# Supplementary material for: Corona or hydrochloric acid modulates embryonic diapause in silkworms by activating different signaling pathways
Source: PeerJ. 2025 Feb 20;13:e18966. doi: 10.7717/peerj.18966 (PMC11847486; doi:10.7717/peerj.18966)
Supplement: Supplemental Information 1 [file peerj-13-18966-s001.xls]

## Sheet: Sheet1
ITEM TO CHECK	IMPORTANCE	CHECKLIST
EXPERIMENTAL DESIGN
Definition of experimental and control groups	E	P3,L75-77
Number within each group	E	P3,L74
Assay carried out by core lab or investigator's lab?	D
Acknowledgement of authors' contributions	D
SAMPLE
Description	E	P3,L75-77
Volume/mass of sample processed	D
Microdissection or macrodissection	E	whole eggs
Processing procedure	E	P3,L68-77
If frozen - how and how quickly?	E	P3,L77-78
If fixed - with what, how quickly?	E	NO
Sample storage conditions and duration (especially for FFPE samples)	E	Liquid nitrogen，P3,L77-78
NUCLEIC ACID EXTRACTION
Procedure and/or instrumentation	E	P4，Line 80
Name of kit and details of any modifications	E	P4，Line 80
Source of additional reagents used	D
Details of DNase or RNAse treatment	E	P4，Line 80
Contamination assessment (DNA or RNA)	E	P4，Line 81
Nucleic acid quantification	E	P4，Line 81
Instrument and method	E	P4，Line 81
Purity (A260/A280)	D
Yield	D
RNA integrity method/instrument	E	P4，Line 81
RIN/RQI or Cq of 3' and 5' transcripts	E	P4，Line 81
Electrophoresis traces	D	P4，Line 81
Inhibition testing (Cq dilutions, spike or other)	E	No
REVERSE TRANSCRIPTION
Complete reaction conditions	E	P5,L106
Amount of RNA and reaction volume	E	according TUREscript 1st Stand cDNA Synthesis Kit (Aidlab, China)， L106
Priming oligonucleotide (if using GSP) and concentration	E	according TUREscript 1st Stand cDNA Synthesis Kit (Aidlab, China)， L106
Reverse transcriptase and concentration	E	according TUREscript 1st Stand cDNA Synthesis Kit (Aidlab, China)， L106
Temperature and time	E	according TUREscript 1st Stand cDNA Synthesis Kit (Aidlab, China)， L106
Manufacturer of reagents and catalogue numbers	D
Cqs with and without RT	D*
Storage conditions of cDNA	D
qPCR TARGET INFORMATION
If multiplex, efficiency and LOD of each assay.	E	No
Sequence accession number	E	Table S1
Location of amplicon	D
Amplicon length	E	200-300bp
In silico specificity screen (BLAST, etc)	E	Blast
Pseudogenes, retropseudogenes or other homologs?	D
Sequence alignment	D
Secondary structure analysis of amplicon	D
Location of each primer by exon or intron (if applicable)	E	NO
What splice variants are targeted?	E	NO
qPCR OLIGONUCLEOTIDES
Primer sequences	E	Table S1
RTPrimerDB Identification Number	D
Probe sequences	D**
Location and identity of any modifications	E	NO
Manufacturer of oligonucleotides	D
Purification method	D
qPCR PROTOCOL
Complete reaction conditions	E	P5,L109-112
Reaction volume and amount of cDNA/DNA	E	P5,L109-112
Primer, (probe), Mg++ and dNTP concentrations	E	P5,L109-112
Polymerase identity and concentration	E	P5,L109-112
Buffer/kit identity and manufacturer	E	P5,L109-112
Exact chemical constitution of the buffer	D
Additives (SYBR Green I, DMSO, etc.)	E	SYBR Green I
Manufacturer of plates/tubes and catalog number	D
Complete thermocycling parameters	E	according to the manufacturer’s instructions
Reaction setup (manual/robotic)	D
Manufacturer of qPCR instrument	E	P5,L109
qPCR VALIDATION
Evidence of optimisation (from gradients)	D
Specificity (gel, sequence, melt, or digest)	E	melt，P5,L110
For SYBR Green I, Cq of the NTC	E	NO
Standard curves with slope and y-intercept	E	NO
PCR efficiency calculated from slope	E	NO
Confidence interval for PCR efficiency or standard error	D
r2 of standard curve	E	NO
Linear dynamic range	E	NO
Cq variation at lower limit	E	NO
Confidence intervals throughout range	D
Evidence for limit of detection	E	NO
If multiplex, efficiency and LOD of each assay.	E	NO
DATA ANALYSIS
qPCR analysis program (source, version)	E	IQ5，P5，L109
Cq method determination	E	Ct
Outlier identification and disposition	E	IQ5，P5，L109
Results of NTCs	E	NO
Justification of number and choice of reference genes	E	IQ5，P5，L109
Description of normalisation method	E	IQ5，P5，L109
Number and concordance of biological replicates	D
Number and stage (RT or qPCR) of technical replicates	E	Three，P5，L112
Repeatability (intra-assay variation)	E	SD，P5，L114
Reproducibility (inter-assay variation, %CV)	D
Power analysis	D
Statistical methods for result significance	E	P5，L114
Software (source, version)	E	P5，L114
Cq or raw data submission using RDML	D
Table 1. MIQE checklist for authors, reviewers and editors. All essential information (E) must be submitted with the manuscript. Desirable
information (D) should be submitted if available. If using primers obtained from RTPrimerDB, information on qPCR target, oligonucleotides,
protocols and validation is available from that source.
*: Assessing the absence of DNA using a no RT assay is essential when first extracting RNA. Once the sample has been validated as
RDNA-free, inclusion of a no-RT control is desirable, but no longer essential.
**: Disclosure of the probe sequence is highly desirable and strongly encouraged. However, since not all commercial pre-designed assay
vendors provide this information, it cannot be an essential requirement. Use of such assays is advised against.
