# Supplementary material for: Corona or hydrochloric acid modulates embryonic diapause in silkworms by activating different signaling pathways
Source: PeerJ. 2025 Feb 20;13:e18966. doi: 10.7717/peerj.18966 (PMC11847486; doi:10.7717/peerj.18966)
Supplement: Table S1 [file peerj-13-18966-s002.xlsx]

## Sheet: Sheet1
Gene_ID	named	F	R
BGIBMGA003777	Cyclin B3	ATGTGACTGCGAAGAGGGC	CCGCTGGAGTTGTTTGGTC
BGIBMGA007169	RAS1	ATTGGTGGTTGTGGGTGCG	AGCCGTGTCCAGGATGTCG
BGIBMGA013453	CDK2	TCTGACGAAGGGACCACTA	GTAAGCACGCACAGGGATA
BGIBMGA003747	Cyclin B2	CGTGGCGTAGTACGAAGCA	ACAGCTCTGGCGGTCAATC
BGIBMGA008092	FOXO3	TGAACTGGCTGAGGTTGGC	CTTCGCTGGTATTGGTGGG
BGIBMGA001790	cyclin G2	GATGCTGCTGAGTGTCGTT	AGTTTCGGCTGAGACTTTT
BGIBMGA014536	HSP70	AAACTGAGCGCACAAGACA	GACTACCCGTAGCGTGGAT
BGIBMGA005784	sHSP20	AGCCAGGATTGCGTGAGGG	TGTGAACCGACGGGACACC
BGIBMGA010403	ALDH	GGCTGCTGGTATCATCACT	ATCTTTGAATCCACCGAAA
BGIBMGA006916	CYP18A1	TCTGGGATGAACCAAACAA	GTCACCTTCAGCCATTTCC
	Actin3	CAAGGCCAACAGAGAGAAGA	CATGGTGATGACCTGACCGT
