# Supplementary material for: Corona or hydrochloric acid modulates embryonic diapause in silkworms by activating different signaling pathways
Source: PeerJ. 2025 Feb 20;13:e18966. doi: 10.7717/peerj.18966 (PMC11847486; doi:10.7717/peerj.18966)
Supplement: Table S2 [file peerj-13-18966-s003.xlsx]

## Sheet: Sheet1
Sample	Reads No.	Bases (bp)	Q30 (bp)	N (%)	Q20 (%)	Q30 (%)
CK1_1	51034138	7655120700	7142555282	0.004294	97.54	93.3
CK1_2	55368230	8305234500	7742618693	0.003627	97.5	93.22
CK6_1	47566380	7134957000	6611935277	0.004344	97.26	92.66
CK6_2	43804734	6570710100	5987766299	0.003621	96.68	91.12
CK20_1	49779022	7466853300	6941124532	0.004249	97.37	92.95
CK20_2	51950584	7792587600	7260654803	0.004247	97.46	93.17
E1_1	43937498	6590624700	6158749274	0.002326	97.67	93.44
E1_2	42870594	6430589100	5999517947	0.002622	97.55	93.29
E6_1	45152798	6772919700	6315894225	0.003808	97.51	93.25
E6_2	49232250	7384837500	6840255660	0.004205	97.22	92.62
E20_1	42629478	6394421700	5971943155	0.003714	97.59	93.39
E20_2	50085084	7512762600	6990074032	0.004226	97.43	93.04
H6_1	43288918	6493337700	6022020258	0.003653	97.3	92.74
H6_2	43092054	6463808100	6007606209	0.004274	97.35	92.94
H20_1	49527242	7429086300	6870519361	0.004256	97.18	92.48
H20_2	42787624	6418143600	5986255520	0.003711	97.52	93.27
