# Supplementary material for: Corona or hydrochloric acid modulates embryonic diapause in silkworms by activating different signaling pathways
Source: PeerJ. 2025 Feb 20;13:e18966. doi: 10.7717/peerj.18966 (PMC11847486; doi:10.7717/peerj.18966)
Supplement: Table S3 [file peerj-13-18966-s004.xlsx]

## Sheet: Sheet1
Sample	Clean Reads No.	Clean Data (bp)	Clean Reads %	Clean Data %
CK1_1	48142910	7221436500	94.33	94.33
CK1_2	52179182	7826877300	94.24	94.24
CK6_1	44875224	6731283600	94.34	94.34
CK6_2	41408320	6211248000	94.52	94.52
CK20_1	46983842	7047576300	94.38	94.38
CK20_2	49124938	7368740700	94.56	94.56
E1_1	41516216	6227432400	94.48	94.48
E1_2	40447000	6067050000	94.34	94.34
E6_1	42660762	6399114300	94.48	94.48
E6_2	46376376	6956456400	94.19	94.19
E20_1	40274712	6041206800	94.47	94.47
E20_2	47338494	7100774100	94.51	94.51
H6_1	40890290	6133543500	94.45	94.45
H6_2	40591184	6088677600	94.19	94.19
H20_1	46747332	7012099800	94.38	94.38
H20_2	40473220	6070983000	94.59	94.59
