# Supplementary material for: Corona or hydrochloric acid modulates embryonic diapause in silkworms by activating different signaling pathways
Source: PeerJ. 2025 Feb 20;13:e18966. doi: 10.7717/peerj.18966 (PMC11847486; doi:10.7717/peerj.18966)
Supplement: Table S4 [file peerj-13-18966-s005.xlsx]

## Sheet: Sheet1
Sample	Clean_Reads	Total_Mapped	Multiple_Mapped	Uniquely_Mapped
E1_1	41516216	35834112 (86.31%)	970070 (2.71%)	34864042 (97.29%)
E1_2	40447000	34784827 (86.00%)	947356 (2.72%)	33837471 (97.28%)
CK1_1	48142910	41676430 (86.57%)	1097222 (2.63%)	40579208 (97.37%)
CK1_2	52179182	44509790 (85.30%)	1195459 (2.69%)	43314331 (97.31%)
CK6_1	44875224	38619482 (86.06%)	1103582 (2.86%)	37515900 (97.14%)
CK6_2	41408320	35654931 (86.11%)	975138 (2.73%)	34679793 (97.27%)
H6_1	40890290	35387582 (86.54%)	1036273 (2.93%)	34351309 (97.07%)
H6_2	40591184	35031062 (86.30%)	971136 (2.77%)	34059926 (97.23%)
E6_1	42660762	37119188 (87.01%)	945135 (2.55%)	36174053 (97.45%)
E6_2	46376376	40116142 (86.50%)	1025624 (2.56%)	39090518 (97.44%)
CK20_1	46983842	39726205 (84.55%)	1309699 (3.30%)	38416506 (96.70%)
CK20_2	49124938	42264086 (86.03%)	1481150 (3.50%)	40782936 (96.50%)
H20_1	46747332	40743148 (87.16%)	1173764 (2.88%)	39569384 (97.12%)
H20_2	40473220	35153101 (86.86%)	1090765 (3.10%)	34062336 (96.90%)
E20_1	40274712	34963521 (86.81%)	965584 (2.76%)	33997937 (97.24%)
E20_2	47338494	41075386 (86.77%)	1087987 (2.65%)	39987399 (97.35%)
