# Supplementary material for: Corona or hydrochloric acid modulates embryonic diapause in silkworms by activating different signaling pathways
Source: PeerJ. 2025 Feb 20;13:e18966. doi: 10.7717/peerj.18966 (PMC11847486; doi:10.7717/peerj.18966)
Supplement: Table S5 [file peerj-13-18966-s006.xlsx]

## Sheet: Sheet1
Sample	Map_Events	Mapped_to_Gene	Mapped_to_InterGene	Mapped_to_Exon
E1_1	34864042	22689205 (65.08%)	12174837 (34.92%)	21678724 (95.55%)
E1_2	33837471	22027770 (65.10%)	11809701 (34.90%)	21025803 (95.45%)
CK1_1	40579208	26938254 (66.38%)	13640954 (33.62%)	25795838 (95.76%)
CK1_2	43314331	27785201 (64.15%)	15529130 (35.85%)	26531595 (95.49%)
CK6_1	37515900	24376518 (64.98%)	13139382 (35.02%)	23282703 (95.51%)
CK6_2	34679793	22947294 (66.17%)	11732499 (33.83%)	21943367 (95.63%)
H6_1	34351309	23167613 (67.44%)	11183696 (32.56%)	22155334 (95.63%)
H6_2	34059926	22928847 (67.32%)	11131079 (32.68%)	21885664 (95.45%)
E6_1	36174053	24305213 (67.19%)	11868840 (32.81%)	23303911 (95.88%)
E6_2	39090518	26271877 (67.21%)	12818641 (32.79%)	25159258 (95.76%)
CK20_1	38416506	26063427 (67.84%)	12353079 (32.16%)	24981287 (95.85%)
CK20_2	40782936	27442261 (67.29%)	13340675 (32.71%)	26329404 (95.94%)
H20_1	39569384	27130381 (68.56%)	12439003 (31.44%)	26133716 (96.33%)
H20_2	34062336	22903647 (67.24%)	11158689 (32.76%)	21916257 (95.69%)
E20_1	33997937	22827781 (67.14%)	11170156 (32.86%)	21845933 (95.70%)
E20_2	39987399	26434118 (66.11%)	13553281 (33.89%)	25352024 (95.91%)
