# Supplementary material for: Corona or hydrochloric acid modulates embryonic diapause in silkworms by activating different signaling pathways
Source: PeerJ. 2025 Feb 20;13:e18966. doi: 10.7717/peerj.18966 (PMC11847486; doi:10.7717/peerj.18966)
Supplement: Table S6 [file peerj-13-18966-s007.xlsx]

## Sheet: Sheet1
id	baseMean	baseMeanA	baseMeanB	foldChange	log2FoldChange	pval	padj	Chromosome	Start Site	End Site	Direction	Length	Name	GO	KEGG	EC	eggNOG Class	eggNOG	Description	NCBI_GI
BGIBMGA011755	1205.44	734.115	1676.76	2.28405	1.1916	1.68415e-45	4.30637e-42	scaf16	495913	498991	+	1587	-	GO:0004672;GO:0004672;GO:0004674;GO:0004674;GO:0005524;GO:0005524;GO:0006468;GO:0006468;	-	-	-	-	-	-
BGIBMGA006839	1183.8	728.355	1639.24	2.25061	1.17031	2.61332e-31	3.40789e-28	scaf70	19878	25368	-	2181	-	GO:0003677;GO:0003677;GO:0003677;GO:0003700;GO:0003700;GO:0003707;GO:0003707;GO:0004887;GO:0004887;GO:0005634;GO:0005634;GO:0005634;GO:0006351;GO:0006351;GO:0006355;GO:0006355;GO:0006355;GO:0008270;GO:0008270;GO:0030522;GO:0043401;GO:0043565;GO:0043565;GO:0046872;	-	-	-	-	-	-
BGIBMGA013639	218.717	88.7248	348.71	3.93024	1.97462	7.282e-26	7.16157e-23	scaf78	1148852	1159587	+	1095	-	GO:0016020;GO:0016021;GO:0016021;	-	-	-	-	-	-
BGIBMGA011084	728.803	470.611	986.994	2.09726	1.06851	4.89272e-25	4.17023e-22	scaf31	3643173	3647090	+	3819	-	GO:0005515;GO:0007165;GO:0007165;GO:0016020;GO:0016021;GO:0016021;	-	-	-	-	-	-
BGIBMGA003079	666.805	370.172	963.438	2.60268	1.38	3.3272e-23	2.12691e-20	scaf13	116074	116814	+	741	-	GO:0003677;GO:0003677;GO:0005634;GO:0005634;	K09267	-	-	-	-	101737080
BGIBMGA013005	2126.34	1200.55	3052.12	2.54226	1.34611	1.2108e-12	3.68575e-10	scaf4	4592193	4595976	+	1812	-	GO:0016614;GO:0016614;GO:0050660;GO:0050660;GO:0055114;GO:0055114;	-	-	-	-	-	-
BGIBMGA009376	381.024	80.4569	681.591	8.4715	3.08262	9.18839e-12	2.34947e-09	scaf53	1921994	1924630	+	1278	-	GO:0005215;GO:0005215;GO:0016020;GO:0016021;GO:0016021;GO:0016021;GO:0022857;GO:0022857;GO:0055085;GO:0055085;	-	-	-	-	-	-
BGIBMGA005208	158.189	82.7909	233.588	2.82142	1.49642	3.16962e-10	5.87299e-08	scaf119	353100	353987	+	888	-	-	-	-	-	-	-	-
BGIBMGA006393	214.427	129.568	299.286	2.30987	1.20781	6.40496e-10	1.07747e-07	scaf11	2679608	2681040	-	1344	-	GO:0003677;GO:0003677;GO:0003677;GO:0005634;GO:0005634;GO:0006355;GO:0006355;GO:0043565;GO:0043565;	-	-	-	-	-	-
BGIBMGA010326	378.743	246.417	511.07	2.07401	1.05242	5.04704e-09	7.86907e-07	scaf109	398166	399163	-	885	-	GO:0016020;GO:0016021;GO:0016021;GO:0022857;GO:0022857;GO:0055085;GO:0055085;	K15109	-	-	-	-	101743934
BGIBMGA008906	178.448	112.248	244.648	2.17953	1.12402	1.67868e-08	2.35226e-06	scaf17	1985060	1997336	-	1233	RUN	GO:0003677;GO:0003677;GO:0003700;GO:0003700;GO:0005524;GO:0005524;GO:0005634;GO:0005634;GO:0006355;GO:0006355;	K20213	-	-	-	Runt [Source:UniProtKB/TrEMBL;Acc:A9QLJ3]"	100126868
BGIBMGA010933	762.411	441.385	1083.44	2.45463	1.29551	2.52598e-07	2.6471e-05	scaf68	173739	183779	-	2052	-	GO:0016020;GO:0016021;GO:0016021;GO:0016021;GO:0055085;GO:0055085;	-	-	-	-	-	-
BGIBMGA007903	128.456	78.9048	178.006	2.25596	1.17374	4.70792e-07	4.55123e-05	scaf3	5844908	5846314	+	1407	-	GO:0003676;GO:0003676;GO:0003677;GO:0003677;	-	-	-	-	-	101739834
BGIBMGA001001	62.728	29.4215	96.0346	3.26409	1.70668	6.94177e-07	6.25004e-05	scaf1	6071748	6072329	-	582	-	GO:0003677;GO:0003677;GO:0006357;GO:0006357;GO:0046983;GO:0046983;	-	-	-	-	-	-
BGIBMGA001148	129.434	80.4569	178.411	2.21748	1.14892	7.74397e-07	6.78128e-05	scaf1	6191216	6191935	+	720	ASH2	GO:0003677;GO:0003677;GO:0006357;GO:0006357;GO:0046983;GO:0046983;	K09067	-	-	-	Achaete-scute-like protein ASH2[Source:UniProtKB/TrEMBL;Acc:A6N867]	100125603
BGIBMGA010213	111.64	67.7866	155.494	2.29388	1.19779	1.73756e-06	0.000139535	scaf15	2062793	2068227	+	951	-	GO:0005615;GO:0005615;	-	-	-	-	-	-
BGIBMGA004361	74.8063	39.9526	109.66	2.74476	1.45668	2.6437e-06	0.000201189	scaf37	3721746	3723266	-	1521	-	GO:0003676;GO:0003676;	K19484	-	-	-	-	101741475
BGIBMGA008100	625.25	374.985	875.516	2.3348	1.2233	3.21295e-06	0.000238823	scaf87	582593	583899	-	372	-	-	-	-	-	-	-	-
BGIBMGA008440	59.4049	29.0645	89.7453	3.0878	1.62658	3.40981e-06	0.000249736	scaf2	1679752	1690553	+	3327	-	GO:0005506;GO:0005506;GO:0009055;GO:0009055;GO:0016491;GO:0016491;GO:0016614;GO:0022900;GO:0046872;GO:0046872;GO:0046872;GO:0050660;GO:0050660;GO:0051536;GO:0051536;GO:0051536;GO:0051537;GO:0051537;GO:0051537;GO:0055114;GO:0055114;GO:0071949;GO:0071949;	-	-	-	-	-	-
BGIBMGA008375	21.3105	5.48831	37.1327	6.76579	2.75826	2.68577e-05	0.00151936	scaf2	2563568	2568780	-	3015	-	GO:0005267;GO:0005267;GO:0006811;GO:0016020;GO:0016020;GO:0016020;GO:0016021;GO:0016021;GO:0071805;GO:0071805;	-	-	-	-	-	-
BGIBMGA005699	105.558	68.2852	142.83	2.09167	1.06466	3.19681e-05	0.00177701	scaf143	66557	67057	-	501	-	GO:0006281;GO:0006281;GO:0008413;GO:0008413;GO:0016787;GO:0016787;	K17816	-	-	-	-	101739539
BGIBMGA000202	244.636	136.697	352.574	2.57923	1.36694	3.33044e-05	0.00181965	BABH01044215	7976	8386	+	411	-	-	-	-	-	-	-	-
BGIBMGA000319	114.593	76.3053	152.88	2.00353	1.00255	4.76481e-05	0.00250692	scaf18	869323	875174	-	3171	-	GO:0003676;GO:0003676;GO:0005515;	-	-	-	-	-	-
BGIBMGA001157	54.6247	29.0999	80.1496	2.75429	1.46168	5.81373e-05	0.00289216	scaf1	6588713	6595793	+	681	-	GO:0046872;GO:0046872;	-	-	-	-	-	-
BGIBMGA002396	337.651	200.757	474.545	2.36378	1.24109	7.62538e-05	0.00362418	scaf14	3534217	3542733	-	657	-	-	-	-	-	-	-	101738673
BGIBMGA013236	16.2392	4.08083	28.3976	6.95878	2.79883	0.000155003	0.0064133	scaf39	1600636	1603780	+	1383	-	GO:0004497;GO:0004497;GO:0005506;GO:0005506;GO:0016020;GO:0016021;GO:0016021;GO:0016491;GO:0016705;GO:0016705;GO:0020037;GO:0020037;GO:0046872;GO:0055114;GO:0055114;GO:0055114;	-	-	-	-	-	-
BGIBMGA007967	83.1316	53.5671	112.696	2.10383	1.07302	0.000208282	0.00827108	scaf3	9114087	9121194	+	1209	-	GO:0004725;GO:0004725;GO:0006470;GO:0006470;GO:0008138;GO:0008138;GO:0016311;GO:0016311;GO:0016787;GO:0016791;GO:0016791;GO:0035335;	-	-	-	-	-	-
BGIBMGA000380	6.81276	0	13.6255	Inf	Inf	0.000225471	0.00878854	scaf18	1112465	1113216	+	492	-	-	-	-	-	-	-	-
BGIBMGA000032	92.2149	61.1947	123.235	2.01382	1.00993	0.000243162	0.00927475	scaf98	74347	87090	+	1971	-	GO:0004445;GO:0016787;GO:0016787;GO:0046856;GO:0046856;	-	-	-	-	-	-
BGIBMGA000830	29.117	12.6703	45.5637	3.59609	1.84643	0.000317613	0.0115034	scaf477	8396	8818	-	423	-	-	-	-	-	-	-	-
BGIBMGA012398	40.2608	21.3661	59.1556	2.76867	1.46919	0.000528955	0.0170345	scaf82	1664306	1668792	+	315	-	GO:0055114;GO:0055114;	-	-	-	-	-	-
BGIBMGA000563	73.0067	43.2662	102.747	2.37477	1.24779	0.000681272	0.0209881	scaf8	3197782	3205069	-	1686	TH	GO:0004497;GO:0004497;GO:0004511;GO:0004511;GO:0004511;GO:0005506;GO:0005506;GO:0009072;GO:0009072;GO:0016491;GO:0016714;GO:0016714;GO:0042423;GO:0042423;GO:0046872;GO:0055114;GO:0055114;GO:0055114;	K00501	EC:1.14.16.2	-	-	Tyrosine hydroxylase[Source:UniProtKB/TrEMBL;Acc:B7XAK2]	100270767
BGIBMGA001276	60.376	37.5832	83.1688	2.21292	1.14595	0.000798977	0.0237005	scaf1	13184825	13200127	+	1377	-	GO:0004497;GO:0004497;GO:0005506;GO:0005506;GO:0016491;GO:0016705;GO:0016705;GO:0020037;GO:0020037;GO:0046872;GO:0055114;GO:0055114;GO:0055114;	K15004	EC:1.14.-.-	-	-	-	101744617
BGIBMGA011545	5.50571	0	11.0114	Inf	Inf	0.000987168	0.028277	scaf22	1955495	1957609	+	1113	-	GO:0004497;GO:0004497;GO:0005506;GO:0005506;GO:0016491;GO:0016705;GO:0016705;GO:0020037;GO:0020037;GO:0046872;GO:0055114;GO:0055114;GO:0055114;	-	-	-	-	-	-
BGIBMGA010698	56.3453	36.6213	76.0694	2.07719	1.05463	0.00288665	0.0649749	scaf148	229358	234728	+	522	-	-	-	-	-	-	-	101736665
BGIBMGA011238	51.9799	33.2869	70.673	2.12315	1.0862	0.00299651	0.0659387	scaf12	3339428	3344930	-	1617	-	GO:0003677;GO:0003677;GO:0005515;	-	-	-	-	-	-
BGIBMGA002238	27.5328	14.5942	40.4715	2.77312	1.47151	0.00419009	0.0846887	scaf34	3939186	3940091	-	906	-	GO:0003676;GO:0003676;	K12379	-	-	-	-	101735539
BGIBMGA006924	42.208	26.3734	58.0426	2.2008	1.13803	0.0053734	0.101626	scaf44	252890	259674	-	315	-	-	-	-	-	-	-	-
BGIBMGA006881	8.31123	1.79994	14.8225	8.23503	3.04177	0.00554305	0.103912	scaf70	1588570	1596460	+	1785	-	GO:0000166;GO:0004672;GO:0004672;GO:0004674;GO:0004674;GO:0004674;GO:0004692;GO:0004692;GO:0005524;GO:0005524;GO:0005524;GO:0006468;GO:0006468;GO:0016301;GO:0016310;GO:0016740;	-	-	-	-	-	-
BGIBMGA007931	48.7412	31.6493	65.833	2.08008	1.05664	0.00575794	0.106689	scaf3	7758415	7761595	+	2649	-	-	-	-	-	-	-	-
BGIBMGA004253	34.5696	20.4218	48.7174	2.38555	1.25432	0.00588925	0.10795	scaf150	375442	376703	+	594	-	-	-	-	-	-	-	-
BGIBMGA006498	85.3228	48.843	121.803	2.49376	1.31832	0.00652445	0.115694	scaf11	4188824	4189197	+	300	-	-	-	-	-	-	-	-
BGIBMGA012385	11.2874	2.74415	19.8306	7.22651	2.8533	0.00698386	0.120641	scaf82	545150	547191	+	1536	-	GO:0004497;GO:0004497;GO:0005506;GO:0005506;GO:0016491;GO:0016705;GO:0016705;GO:0020037;GO:0020037;GO:0046872;GO:0055114;GO:0055114;GO:0055114;	-	-	-	-	-	-
BGIBMGA002934	3.84475	0	7.68949	Inf	Inf	0.00897454	0.143067	scaf30	4007443	4007766	+	324	-	-	-	-	-	-	-	101742431
BGIBMGA013913	26.675	14.9866	38.3634	2.55984	1.35605	0.00959168	0.149366	scaf29	2176903	2181560	-	549	-	GO:0016020;GO:0016021;GO:0016021;	-	-	-	-	-	101745983
BGIBMGA007932	32.5706	18.1941	46.9471	2.58036	1.36757	0.00992563	0.152707	scaf3	7785478	7799225	+	2592	-	GO:0005089;GO:0005089;GO:0005515;GO:0035023;GO:0035023;	-	-	-	-	-	-
BGIBMGA014212	44.0742	28.976	59.1724	2.04212	1.03007	0.0102668	0.156449	BABH01043567	1814	2964	+	921	-	GO:0046332;GO:0046332;	-	-	-	-	-	-
BGIBMGA010717	4.86016	0.445559	9.27477	20.816	4.37962	0.0110104	0.164495	scaf25	3990078	3991110	-	882	OSI20	GO:0016020;GO:0016021;GO:0016021;	-	-	-	-	Osiris 20 [Source:UniProtKB/TrEMBL;Acc:B6DXA7]"	100190961
BGIBMGA002446	17.7346	8.58952	26.8796	3.12935	1.64586	0.012612	0.182197	scaf14	464699	467882	-	699	-	GO:0003924;GO:0003924;GO:0005525;GO:0005525;GO:0007165;GO:0007165;GO:0016020;GO:0016020;	-	-	-	-	-	-
BGIBMGA006244	4.91062	0.445559	9.37569	21.0425	4.39524	0.0128182	0.184759	scaf88	36822	40285	+	2394	-	GO:0005515;GO:0016020;GO:0016021;GO:0016021;	-	-	-	-	-	-
BGIBMGA000554	26.6005	15.3437	37.8574	2.46729	1.30293	0.0135072	0.191578	scaf8	3596005	3597648	-	1287	-	-	-	-	-	-	-	-
BGIBMGA013936	20.0106	10.4603	29.561	2.82603	1.49878	0.0141475	0.197531	scaf29	376650	378176	-	1527	-	-	-	-	-	-	-	-
BGIBMGA006693	7.02643	1.37208	12.6808	9.24204	3.20821	0.0169585	0.220568	scaf10	2346141	2371939	+	3447	-	GO:0005515;	-	-	-	-	-	-
BGIBMGA014536	32.101	20.4927	43.7093	2.13293	1.09283	0.0196225	0.241224	scaf377	13743	15629	-	1887	BMO.7782	GO:0000166;GO:0005524;GO:0005524;	K03283	-	-	-	Heat shock protein 68[Source:UniProtKB/TrEMBL;Acc:F8UN43]	100862772
BGIBMGA002000	26.7895	16.4295	37.1495	2.26115	1.17705	0.0222443	0.264061	scaf23	4701771	4704454	-	1155	-	GO:0003677;GO:0003677;GO:0003677;GO:0003700;GO:0003700;GO:0003707;GO:0003707;GO:0005634;GO:0005634;GO:0005634;GO:0006351;GO:0006351;GO:0006355;GO:0006355;GO:0006355;GO:0008270;GO:0008270;GO:0043401;GO:0043565;GO:0043565;GO:0046872;	-	-	-	-	-	-
BGIBMGA008054	8.98974	3.20741	14.7721	4.6056	2.20339	0.0239037	0.276819	scaf41	794783	796672	+	771	-	-	-	-	-	-	-	-
BGIBMGA005532	52.7837	34.659	70.9084	2.04589	1.03273	0.0261472	0.29479	scaf33	3916037	3922463	-	1860	-	GO:0070403;GO:0070403;	-	-	-	-	-	-
BGIBMGA009350	6.65868	1.79994	11.5174	6.3988	2.6778	0.0268143	0.298415	scaf53	54203	55207	+	504	-	-	-	-	-	-	-	-
BGIBMGA012115	15.1065	7.7515	22.4616	2.8977	1.53491	0.0308211	0.325122	scaf24	3487770	3490167	+	1644	-	GO:0016614;GO:0016614;GO:0050660;GO:0050660;GO:0055114;GO:0055114;	-	-	-	-	-	-
BGIBMGA013844	35.1063	22.4903	47.7222	2.1219	1.08536	0.0363778	0.357755	scaf62	64011	64652	-	510	-	-	-	-	-	-	-	-
BGIBMGA008907	12.0017	5.47061	18.5327	3.38769	1.7603	0.0372943	0.362319	scaf17	1896234	1896870	-	273	-	GO:0003677;GO:0003677;GO:0003700;GO:0003700;GO:0005524;GO:0005524;GO:0005634;GO:0005634;GO:0006355;GO:0006355;	-	-	-	-	-	-
BGIBMGA006956	6.8996	2.29859	11.5006	5.00332	2.32289	0.0422595	0.389818	scaf44	2245489	2251462	+	786	-	GO:0003924;GO:0003924;GO:0005525;GO:0005525;	K07914	-	-	-	-	101736393
BGIBMGA002879	10.2318	4.56179	15.9018	3.48587	1.80152	0.0433332	0.396308	scaf30	1389312	1392381	+	1941	-	GO:0005515;	-	-	-	-	-	-
BGIBMGA004240	4.57782	0.926518	8.22913	8.88178	3.15085	0.0437638	0.397624	scaf150	214932	216682	-	564	-	-	-	-	-	-	-	-
BGIBMGA004399	14.9913	8.16166	21.821	2.6736	1.41878	0.0459798	0.409367	scaf37	1633889	1634659	-	771	LP-C12	GO:0005576;GO:0005576;	-	-	-	-	Low molecular 30 kDa lipoprotein PBMHP-12[Source:UniProtKB/Swiss-Prot;Acc:P09335]	-
BGIBMGA003770	8.19666	3.18971	13.2036	4.13944	2.04943	0.0460207	0.409446	scaf91	171506	171748	-	243	-	-	-	-	-	-	-	-
BGIBMGA013762	15.5698	8.67802	22.4616	2.58833	1.37202	0.0482381	0.419945	scaf47	474316	475546	-	837	-	GO:0004984;GO:0004984;GO:0005549;GO:0005549;GO:0007165;GO:0007608;GO:0007608;GO:0007608;GO:0016020;GO:0016020;GO:0016020;GO:0016021;GO:0016021;GO:0050896;GO:0050911;	-	-	-	-	-	-
BGIBMGA008561	4.52649	0.891117	8.16185	9.15912	3.19521	0.0484036	0.420694	scaf2	10496883	10513506	+	5535	-	GO:0006897;GO:0006897;	-	-	-	-	-	-
BGIBMGA003024	22.3745	14.0247	30.7243	2.19073	1.13141	0.0491879	0.423765	scaf13	3782049	3784077	-	441	-	GO:0016020;GO:0016021;GO:0016021;	-	-	-	-	-	-
BGIBMGA007499	22.3241	14.0247	30.6234	2.18353	1.12666	0.0492761	0.423954	scaf66	1485746	1487768	-	537	-	-	-	-	-	-	-	-
BGIBMGA007397	9772.87	15517.8	4027.93	0.259568	-1.94581	8.2343e-87	1.05276e-82	scaf55	780051	781377	+	645	-	GO:0005737;GO:0005737;GO:0009968;GO:0009968;	-	-	-	-	-	-
BGIBMGA009298	3548.6	5217.31	1879.9	0.36032	-1.47265	6.8073e-48	2.90104e-44	scaf38	3612292	3617247	+	1128	-	GO:0016301;GO:0016301;GO:0016301;GO:0016310;GO:0016740;GO:0032958;GO:0032958;	-	-	-	-	-	-
BGIBMGA005302	414.064	626.801	201.327	0.321198	-1.63847	1.52936e-32	2.44411e-29	scaf19	5245183	5245981	-	507	CPH43	GO:0016020;GO:0016021;GO:0016021;	-	-	-	-	Putative cuticle protein CPH43[Source:UniProtKB/TrEMBL;Acc:D0VEQ4]	-
BGIBMGA006787	1186.53	1762.62	610.437	0.346323	-1.52981	1.02119e-22	5.93449e-20	scaf10	6969461	6969836	+	267	-	-	-	-	-	-	-	-
BGIBMGA004665	245.945	357.003	134.887	0.377832	-1.40418	7.90592e-16	3.26055e-13	scaf135	284105	284491	+	387	-	-	-	-	-	-	-	-
BGIBMGA013475	323.697	440.03	207.364	0.47125	-1.08544	5.35367e-13	1.80123e-10	scaf111	865608	866259	+	381	-	GO:0003700;GO:0003700;GO:0005622;GO:0005622;GO:0005634;GO:0005634;GO:0005667;GO:0005667;GO:0006351;GO:0006355;GO:0006355;GO:0007179;GO:0007179;	-	-	-	-	-	-
BGIBMGA005284	88.7727	134.275	43.2706	0.322254	-1.63373	1.83749e-08	2.52605e-06	scaf19	6056165	6057827	-	339	-	-	-	-	-	-	-	-
BGIBMGA009433	46.9052	75.6827	18.1276	0.239521	-2.06177	5.17874e-07	4.8684e-05	scaf40	3564911	3565402	-	156	-	-	-	-	-	-	-	-
BGIBMGA014033	133.085	180.675	85.4955	0.473201	-1.07947	3.25411e-06	0.000240484	scaf173	12619	15164	-	363	-	-	-	-	-	-	-	-
BGIBMGA005481	29.376	49.9496	8.80241	0.176226	-2.5045	3.65357e-06	0.000263903	scaf19	4305876	4306670	+	612	-	GO:0005515;	-	-	-	-	-	-
BGIBMGA001905	56.7908	86.1961	27.3856	0.317713	-1.65421	5.48697e-06	0.000386492	scaf28	743112	745131	-	1113	-	GO:0003824;GO:0003824;GO:0005515;GO:0006518;GO:0006518;GO:0016020;GO:0016020;	K18200	EC:4.3.2.5	-	-	-	101742958
BGIBMGA000751	94.5639	132.991	56.1364	0.422105	-1.24432	5.81575e-06	0.000406308	scaf89	1409103	1410197	-	195	-	-	-	-	-	-	-	-
BGIBMGA013476	107.031	146.087	67.9748	0.465305	-1.10375	1.95854e-05	0.00118266	scaf111	887348	890345	+	591	-	GO:0005515;GO:0005622;GO:0005622;GO:0006355;GO:0006355;	-	-	-	-	-	-
BGIBMGA011836	47.7236	69.141	26.3063	0.380474	-1.39413	0.000389733	0.01354	scaf16	3135228	3135884	+	657	-	-	-	-	-	-	-	-
BGIBMGA010420	14.85	25.8217	3.87838	0.150199	-2.73505	0.000517833	0.0167184	scaf6	3797137	3802257	-	1029	-	GO:0003676;GO:0003676;	-	-	-	-	-	-
BGIBMGA007259	78.3914	105.317	51.4661	0.488679	-1.03304	0.000595952	0.0189534	scaf92	1393289	1395059	-	735	-	GO:0016491;GO:0016491;GO:0055114;	-	-	-	-	-	-
BGIBMGA003150	62.8558	85.662	40.0496	0.46753	-1.09687	0.00108248	0.0304836	scaf13	4176561	4177109	+	399	-	-	-	-	-	-	-	-
BGIBMGA009432	40.9714	58.486	23.4567	0.401066	-1.31809	0.00188882	0.0467774	scaf40	3612950	3628284	-	552	TOY	GO:0003677;GO:0003677;GO:0003677;GO:0005634;GO:0005634;GO:0006351;GO:0006351;GO:0006355;GO:0006355;GO:0006355;GO:0007275;GO:0007275;	K08031	-	-	-	Pak6 [Source:UniProtKB/TrEMBL;Acc:E9JEI5]"	100529217
BGIBMGA011647	7.84514	14.5942	1.0961	0.075105	-3.73495	0.00282624	0.0637276	scaf16	3129836	3131886	-	441	-	-	-	-	-	-	-	-
BGIBMGA001286	39.1103	60.1266	18.094	0.300932	-1.73249	0.00298038	0.0658103	scaf1	13854864	13862484	+	939	-	-	-	-	-	-	-	-
BGIBMGA005596	76.4266	102.162	50.691	0.49618	-1.01106	0.00329009	0.0708144	scaf33	26486	30038	-	555	-	GO:0003700;GO:0003700;GO:0006355;GO:0006355;GO:0008270;GO:0008270;GO:0043565;GO:0043565;GO:0046872;	-	-	-	-	-	-
BGIBMGA011325	11.6444	19.4776	3.81111	0.195666	-2.35354	0.00736857	0.124778	scaf12	1652306	1652596	+	291	-	-	-	-	-	-	-	-
BGIBMGA012593	82.236	122.906	41.5661	0.338195	-1.56407	0.00802053	0.1315	scaf100	695437	697041	-	348	-	-	-	-	-	-	-	-
BGIBMGA013872	28.5087	40.5928	16.4246	0.404619	-1.30537	0.0110125	0.164495	scaf62	1604691	1627469	+	885	-	GO:0003677;GO:0003677;GO:0003677;GO:0005634;GO:0005634;GO:0006355;GO:0006355;GO:0043565;GO:0043565;GO:0046872;GO:0046872;	-	-	-	-	-	-
BGIBMGA001881	44.2662	59.0555	29.4769	0.499139	-1.00249	0.0131945	0.188483	scaf28	2150169	2150569	-	273	-	-	-	-	-	-	-	-
BGIBMGA002387	24.2849	34.9275	13.6423	0.39059	-1.35627	0.0151408	0.20637	scaf14	4912523	4913430	-	282	-	-	-	-	-	-	-	-
BGIBMGA002192	22.2987	32.5404	12.0571	0.370525	-1.43236	0.0151626	0.206448	scaf64	2028191	2028436	+	246	-	-	-	-	-	-	-	-
BGIBMGA004089	3.63527	7.27054	0	0	-Inf	0.0173583	0.223942	scaf36	1086989	1089023	+	1836	-	-	-	-	-	-	-	-
BGIBMGA006382	5.98325	10.8704	1.0961	0.100833	-3.30996	0.0179216	0.229127	scaf11	4067995	4073314	-	2043	-	GO:0005576;GO:0005576;GO:0006030;GO:0006030;GO:0008061;GO:0008061;	-	-	-	-	-	-
BGIBMGA008196	28.0372	39.0261	17.0484	0.436845	-1.19481	0.0192789	0.239534	scaf52	2445260	2446112	+	318	-	-	-	-	-	-	-	-
BGIBMGA013751	23.6911	33.2338	14.1483	0.425721	-1.23202	0.0300168	0.320338	scaf47	2169278	2169508	-	231	-	GO:0004252;GO:0004252;GO:0006508;GO:0006508;	-	-	-	-	-	-
BGIBMGA004368	21.5595	30.4719	12.6472	0.415043	-1.26867	0.0315971	0.328965	scaf37	3279944	3281155	-	1113	-	-	-	-	-	-	-	-
BGIBMGA000451	24.9942	34.6767	15.3117	0.441556	-1.17933	0.0318808	0.330572	scaf18	4037744	4040406	+	363	-	-	-	-	-	-	-	-
BGIBMGA011564	13.5258	20.4749	6.57658	0.321201	-1.63845	0.034288	0.344904	scaf22	2930813	2933212	+	291	-	GO:0003677;GO:0003677;GO:0003677;GO:0005634;GO:0005634;GO:0006351;GO:0006355;GO:0006355;GO:0007275;GO:0007275;GO:0046872;GO:0046872;	-	-	-	-	-	-
BGIBMGA008149	13.4567	20.4041	6.5093	0.319018	-1.64829	0.0347054	0.34828	scaf52	759048	759788	-	195	-	-	-	-	-	-	-	-
BGIBMGA000449	14.9131	22.2041	7.62222	0.34328	-1.54254	0.0350715	0.350852	scaf18	3961027	3963606	+	618	-	-	-	-	-	-	-	-
BGIBMGA013479	29.116	39.0084	19.2237	0.492811	-1.0209	0.0405325	0.381597	scaf101	1080776	1089915	-	2616	-	-	-	-	-	-	-	-
BGIBMGA008299	17.4672	25.019	9.91532	0.396311	-1.33529	0.0435987	0.396732	scaf2	10766123	10767320	-	1104	-	-	-	-	-	-	-	-
BGIBMGA012987	13.7252	20.351	7.0994	0.348847	-1.51933	0.0461758	0.409791	scaf4	3805821	3810748	+	468	-	GO:0003677;GO:0003677;GO:0003677;GO:0005634;GO:0005634;	-	-	-	-	-	-
