# Supplementary material for: Corona or hydrochloric acid modulates embryonic diapause in silkworms by activating different signaling pathways
Source: PeerJ. 2025 Feb 20;13:e18966. doi: 10.7717/peerj.18966 (PMC11847486; doi:10.7717/peerj.18966)
Supplement: Table S7 [file peerj-13-18966-s008.xlsx]

## Sheet: Sheet1
id	baseMean	baseMeanA	baseMeanB	foldChange	log2FoldChange	pval	padj	Chromosome	Start Site	End Site	Direction	Length	Name	GO	KEGG	EC	eggNOG Class	eggNOG	Description	NCBI_GI
BGIBMGA006021	79.5396	5.92639	153.153	25.8425	4.69167	1.21722e-14	5.15655e-11	scaf5	2336808	2342044	-	594	-	GO:0016020;GO:0016021;GO:0016021;GO:0016021;	-	-	-	-	-	-
BGIBMGA004612	11916.9	5572.86	18261	3.27676	1.71227	2.94952e-07	0.000288349	scaf128	617708	619858	-	2151	HSP90	GO:0000166;GO:0005515;GO:0005524;GO:0005524;GO:0005524;GO:0005737;GO:0005737;GO:0006457;GO:0006457;GO:0006950;GO:0051082;GO:0051082;	K04079	-	-	-	90-kDa heat shock protein[Source:UniProtKB/TrEMBL;Acc:Q9BLC5]	692420
BGIBMGA012526	906.018	576.553	1235.48	2.14288	1.09955	3.42903e-06	0.00229366	scaf77	1554877	1562708	-	1317	-	GO:0003824;GO:0003824;GO:0008483;GO:0008483;GO:0030170;GO:0030170;	-	-	-	-	-	-
BGIBMGA013629	257.911	170.393	345.43	2.02726	1.01953	0.000191857	0.0518789	scaf78	840780	850054	+	1575	-	GO:0016020;GO:0016021;GO:0016021;GO:0016021;GO:0055085;GO:0055085;	-	-	-	-	-	101739498
BGIBMGA011600	83.1783	50.7162	115.64	2.28015	1.18913	0.000348079	0.0804315	scaf16	6226080	6232979	-	1383	-	GO:0003824;GO:0003824;GO:0008483;GO:0008483;GO:0030170;GO:0030170;	-	-	-	-	-	-
BGIBMGA001276	99.5751	65.7828	133.367	2.02739	1.01962	0.000687297	0.132346	scaf1	13184825	13200127	+	1377	-	GO:0004497;GO:0004497;GO:0005506;GO:0005506;GO:0016491;GO:0016705;GO:0016705;GO:0020037;GO:0020037;GO:0046872;GO:0055114;GO:0055114;GO:0055114;	K15004	EC:1.14.-.-	-	-	-	101744617
BGIBMGA006366	98.9497	65.1313	132.768	2.03847	1.02749	0.00142678	0.197097	scaf11	4969425	4970116	-	312	-	-	-	-	-	-	-	-
BGIBMGA005957	84.3895	56.0254	112.754	2.01254	1.00902	0.00231487	0.282881	scaf5	7074482	7095490	-	1275	-	-	-	-	-	-	-	-
BGIBMGA002253	35.5633	18.5628	52.5638	2.83168	1.50166	0.00296225	0.343186	scaf34	3113611	3120863	-	540	-	GO:0016020;GO:0016021;GO:0016021;	-	-	-	-	-	-
BGIBMGA002852	180.118	113.827	246.41	2.16477	1.11421	0.00314987	0.351835	scaf30	77179	80890	+	1440	-	GO:0016020;GO:0016021;GO:0016021;GO:0016021;GO:0022857;GO:0022857;GO:0055085;GO:0055085;	-	-	-	-	-	101747196
BGIBMGA000949	58.4655	35.7247	81.2062	2.27311	1.18467	0.00356703	0.378796	scaf1	8829381	8833096	-	1065	-	GO:0005515;	-	-	-	-	-	-
BGIBMGA010735	35.6398	20.189	51.0906	2.53062	1.33949	0.00776685	0.587553	scaf25	2563689	2578616	-	1440	-	GO:0004553;GO:0004553;GO:0005975;GO:0005975;	-	-	-	-	-	-
BGIBMGA005788	60.3107	39.8177	80.8036	2.02934	1.02101	0.00795883	0.598514	scaf54	157357	157590	+	234	-	-	-	-	-	-	-	-
BGIBMGA006893	15.1434	5.96289	24.3239	4.07922	2.02829	0.00864063	0.636665	scaf44	3062358	3066496	-	729	-	GO:0006508;GO:0006508;GO:0008234;GO:0008234;	-	-	-	-	-	-
BGIBMGA014107	22.1501	10.5432	33.7571	3.20179	1.67888	0.00920745	0.656025	scaf76	1240788	1245251	-	510	-	GO:0005515;	-	-	-	-	-	-
BGIBMGA004043	7.70632	1.53285	13.8798	9.05487	3.17869	0.0129906	0.778765	scaf36	361850	367362	-	375	CSP14	-	-	-	-	-	Chemosensory protein 14; Chemosensory protein CSP2[Source:UniProtKB/TrEMBL;Acc:Q3LB92]	692682
BGIBMGA013705	656.195	275.398	1036.99	3.76542	1.91281	0.0189015	0.957051	scaf104	231065	237540	-	882	-	GO:0008168;GO:0016740;GO:0017174;GO:0017174;GO:0032259;	K00552	EC:2.1.1.20	-	-	-	101738705
BGIBMGA009168	20.8725	10.6183	31.1266	2.9314	1.55159	0.0221084	1	scaf96	1443573	1457855	+	2757	-	-	-	-	-	-	-	-
BGIBMGA005368	36.0183	22.8994	49.1372	2.14578	1.10151	0.0248353	1	scaf19	1289951	1291336	-	282	-	-	-	-	-	-	-	-
BGIBMGA005228	3.64147	0	7.28295	Inf	Inf	0.0282252	1	scaf110	228160	229485	+	579	-	-	-	-	-	-	-	-
BGIBMGA008557	40.8758	27.1062	54.6454	2.01597	1.01148	0.0293585	1	scaf2	10355085	10364709	+	1524	-	GO:0003824;GO:0003824;GO:0008152;	-	-	-	-	-	-
BGIBMGA007403	18.0431	8.91696	27.1693	3.04692	1.60735	0.0309945	1	scaf55	1215158	1219380	+	654	-	GO:0005515;	-	-	-	-	-	-
BGIBMGA005819	20.5488	9.02859	32.069	3.55194	1.82861	0.0317586	1	scaf54	1319476	1321985	+	657	-	GO:0015267;GO:0015267;GO:0016020;GO:0016020;GO:0016020;GO:0016021;GO:0016021;GO:0055085;GO:0055085;	-	-	-	-	-	-
BGIBMGA004678	16.2375	7.73941	24.7356	3.19606	1.67629	0.0345137	1	scaf140	76700	86049	-	1482	-	GO:0004497;GO:0004497;GO:0005506;GO:0005506;GO:0016491;GO:0016705;GO:0016705;GO:0020037;GO:0020037;GO:0046872;GO:0055114;GO:0055114;GO:0055114;	-	-	-	-	-	-
BGIBMGA001034	26.4437	15.292	37.5953	2.45849	1.29777	0.0345523	1	scaf1	4170683	4171693	-	1011	-	-	-	-	-	-	-	101740370
BGIBMGA003571	219.174	138.802	299.546	2.15808	1.10975	0.0351224	1	scaf9	1643025	1644469	-	303	-	GO:0016020;GO:0016021;GO:0016021;	-	-	-	-	-	-
BGIBMGA001973	26.792	16.0391	37.5448	2.34083	1.22702	0.0359772	1	scaf28	3874944	3880273	+	405	-	GO:0016020;GO:0016021;GO:0016021;	-	-	-	-	-	-
BGIBMGA014365	34.6688	22.8994	46.4381	2.02792	1.02	0.0395912	1	scaf155	248228	258130	-	3702	-	GO:0003341;GO:0003341;GO:0003777;GO:0003777;GO:0005524;GO:0005524;GO:0005858;GO:0005858;GO:0007018;GO:0007018;GO:0016887;GO:0016887;	-	-	-	-	-	-
BGIBMGA007547	36.907	24.4892	49.3249	2.01415	1.01017	0.0412091	1	scaf66	165264	169608	-	1668	-	GO:0016787;GO:0016787;	-	-	-	-	-	101737532
BGIBMGA005348	24.6995	14.7682	34.6309	2.34496	1.22956	0.0413972	1	scaf19	3112396	3128337	-	2409	-	GO:0005515;GO:0007275;GO:0007275;	-	-	-	-	-	-
BGIBMGA006671	14.6137	7.12219	22.1051	3.1037	1.63399	0.0417248	1	scaf10	17996	18542	-	186	-	GO:0016020;GO:0016021;GO:0016021;	-	-	-	-	-	-
BGIBMGA004235	16.1742	8.48651	23.8618	2.81173	1.49146	0.0427024	1	scaf150	326526	328803	-	393	-	-	-	-	-	-	-	-
BGIBMGA009416	6.13071	1.34608	10.9154	8.10901	3.01952	0.0450082	1	scaf81	712141	720454	+	1488	-	-	-	-	-	-	-	-
BGIBMGA008538	88.5608	50.0625	127.059	2.53801	1.3437	0.0470294	1	scaf2	8825717	8840501	+	645	-	-	-	-	-	-	-	-
BGIBMGA008709	2193.59	3123.95	1263.24	0.404373	-1.30624	1.44149e-27	1.83199e-23	scaf90	406890	408545	+	1656	-	GO:0004553;GO:0004553;GO:0004568;GO:0004568;GO:0005975;GO:0005975;GO:0006032;GO:0006032;GO:0008061;GO:0008061;GO:0008152;GO:0016787;GO:0016798;	-	-	-	-	-	-
BGIBMGA001725	329.516	442.468	216.563	0.489445	-1.03078	4.90859e-08	5.67121e-05	scaf35	330370	342252	+	1260	-	GO:0008152;	-	-	-	-	-	-
BGIBMGA001726	270.282	365.169	175.395	0.480312	-1.05796	1.4864e-07	0.000157422	scaf35	390941	394350	+	855	-	GO:0008152;	-	-	-	-	-	-
BGIBMGA004683	808.842	1096.8	520.879	0.474906	-1.07428	3.45004e-07	0.000302655	scaf140	62040	64241	+	1449	-	GO:0016787;GO:0016787;	-	-	-	-	-	-
BGIBMGA004515	96.4139	149.834	42.9934	0.28694	-1.80118	6.84297e-06	0.00434836	scaf97	1076410	1077045	-	636	-	GO:0046872;	-	-	-	-	-	-
BGIBMGA001473	95.7145	130.279	61.1503	0.469381	-1.09117	0.000400379	0.0908646	scaf7	418567	433423	-	2304	-	GO:0005215;GO:0005215;GO:0006811;GO:0006811;GO:0016020;GO:0016020;GO:0016020;GO:0016021;GO:0016021;GO:0055085;GO:0055085;	-	-	-	-	-	-
BGIBMGA004605	699.611	1087.88	311.344	0.286194	-1.80494	0.000883559	0.156783	scaf48	2707115	2707675	+	87	-	-	-	-	-	-	-	-
BGIBMGA010014	7.61644	14.6931	0.539814	0.0367393	-4.76653	0.00227736	0.281258	scaf45	1743670	1747351	-	1107	-	-	-	-	-	-	-	-
BGIBMGA004595	71.8276	97.6196	46.0356	0.471581	-1.08442	0.00274892	0.328985	scaf48	1593840	1601712	+	1296	-	GO:0000166;GO:0001678;GO:0001678;GO:0004396;GO:0004396;GO:0004396;GO:0005524;GO:0005524;GO:0005524;GO:0005536;GO:0005536;GO:0005623;GO:0005623;GO:0005975;GO:0005975;GO:0006096;GO:0006096;GO:0006096;GO:0016301;GO:0016310;GO:0016740;GO:0016773;GO:0016773;GO:0046835;	-	-	-	-	-	-
BGIBMGA004248	58.8083	81.3572	36.2594	0.445681	-1.16592	0.00297038	0.343186	scaf150	86667	87351	+	279	-	-	-	-	-	-	-	-
BGIBMGA006775	94.0119	127.962	60.0616	0.46937	-1.0912	0.00416269	0.406951	scaf10	6241444	6241983	+	540	LEB1/2	-	-	-	-	-	Lebocin-3 [Source:UniProtKB/Swiss-Prot;Acc:P55796]	-
BGIBMGA011617	12.5197	21.5351	3.50425	0.162723	-2.61951	0.00667642	0.54045	scaf16	5219643	5222592	-	996	-	GO:0005576;GO:0005576;GO:0052689;GO:0052689;	-	-	-	-	-	-
BGIBMGA014536	50.2429	68.6821	31.8036	0.463055	-1.11074	0.0102744	0.698275	scaf377	13743	15629	-	1887	BMO.7782	GO:0000166;GO:0005524;GO:0005524;	K03283	-	-	-	Heat shock protein 68[Source:UniProtKB/TrEMBL;Acc:F8UN43]	100862772
BGIBMGA002051	84.9661	117.419	52.5133	0.44723	-1.16091	0.0115261	0.755078	scaf23	610058	612900	-	312	-	GO:0006508;GO:0006508;GO:0006508;GO:0008233;GO:0008237;GO:0008237;GO:0016020;GO:0016787;GO:0016805;GO:0016805;GO:0016805;GO:0031225;GO:0031225;GO:0046872;GO:0046872;	-	-	-	-	-	-
BGIBMGA009689	406.399	542.339	270.458	0.498688	-1.00379	0.0121732	0.76907	scaf27	1128425	1132319	-	765	-	GO:0016020;GO:0016021;GO:0016021;GO:0016021;	-	-	-	-	-	-
BGIBMGA008597	33.8245	48.1743	19.4747	0.404254	-1.30666	0.0140715	0.809206	scaf85	391126	393108	+	1872	-	GO:0005515;GO:0016020;GO:0016021;GO:0016021;	-	-	-	-	-	-
BGIBMGA008901	46.1414	62.364	29.9188	0.479746	-1.05966	0.0170337	0.890871	scaf17	2421048	2421642	-	330	-	GO:0016020;GO:0016021;GO:0016021;	-	-	-	-	-	-
BGIBMGA004541	394.335	562.701	225.969	0.40158	-1.31624	0.0179447	0.923315	scaf48	2701904	2702449	-	546	HSP20.4	GO:0046872;	K09542	-	-	-	Heat shock protein hsp20.4[Source:UniProtKB/TrEMBL;Acc:Q9GSB6]	692591
BGIBMGA012885	13.9674	22.1341	5.80073	0.262072	-1.93196	0.0186342	0.947289	scaf4	1739846	1745594	-	657	-	-	-	-	-	-	-	-
BGIBMGA013959	10.1249	17.2167	3.03305	0.176169	-2.50497	0.0204138	0.986462	scaf29	626204	628839	+	762	-	GO:0046983;GO:0046983;	K09068	-	-	-	-	101743147
BGIBMGA013991	40.9253	55.8386	26.012	0.465842	-1.10209	0.0228609	1	scaf29	2799791	2800627	+	837	-	-	-	-	-	-	-	101735900
BGIBMGA014248	3.50528	7.01055	0	0	-Inf	0.0312727	1	scaf80	205759	211533	-	1053	-	GO:0016020;GO:0016021;GO:0016021;GO:0016021;GO:0055085;GO:0055085;	-	-	-	-	-	-
BGIBMGA009874	145.932	213.622	78.2418	0.366263	-1.44905	0.0325051	1	scaf51	433778	453764	+	1677	-	GO:0016787;GO:0016787;	-	-	-	-	-	-
BGIBMGA014161	12.9934	20.8631	5.12369	0.245586	-2.0257	0.0354373	1	scaf99	272503	285392	-	1623	-	GO:0005509;GO:0005509;GO:0016020;GO:0016021;GO:0016021;	-	-	-	-	-	-
BGIBMGA008435	32.1877	43.9493	20.4262	0.464766	-1.10542	0.0378328	1	scaf2	1360568	1362473	+	252	-	-	-	-	-	-	-	-
BGIBMGA002791	28.5335	39.7426	17.3245	0.435918	-1.19787	0.0398249	1	scaf30	2848468	2851233	-	2766	-	-	-	-	-	-	-	101741846
BGIBMGA000861	8.07299	13.5155	2.63046	0.194625	-2.36123	0.0464097	1	scaf1	13449676	13451754	-	450	-	-	-	-	-	-	-	-
BGIBMGA007930	52.359	77.0774	27.6405	0.358607	-1.47952	0.0492017	1	scaf3	7611184	7619399	+	1119	-	GO:0004930;GO:0004930;GO:0004930;GO:0007165;GO:0007186;GO:0007186;GO:0007186;GO:0016020;GO:0016021;GO:0016021;GO:0016021;	-	-	-	-	-	-
