# Supplementary material for: Corona or hydrochloric acid modulates embryonic diapause in silkworms by activating different signaling pathways
Source: PeerJ. 2025 Feb 20;13:e18966. doi: 10.7717/peerj.18966 (PMC11847486; doi:10.7717/peerj.18966)
Supplement: Table S8 [file peerj-13-18966-s009.xlsx]

## Sheet: Sheet1
id	baseMean	baseMeanA	baseMeanB	foldChange	log2FoldChange	pval	padj	Chromosome	Start Site	End Site	Direction	Length	Name	GO	KEGG	EC	eggNOG Class	eggNOG	Description	NCBI_GI
BGIBMGA011575	883.335	28.3122	1738.36	61.3995	5.94015	1.21285e-59	1.55693e-55	scaf22	3636219	3637520	+	504	-	-	-	-	-	-	-	-
BGIBMGA001276	381.264	17.6681	744.86	42.1584	5.39775	1.86585e-36	7.98397e-33	scaf1	13184825	13200127	+	1377	-	GO:0004497;GO:0004497;GO:0005506;GO:0005506;GO:0016491;GO:0016705;GO:0016705;GO:0020037;GO:0020037;GO:0046872;GO:0055114;GO:0055114;GO:0055114;	K15004	EC:1.14.-.-	-	-	-	101744617
BGIBMGA000714	1539.18	643.099	2435.26	3.78676	1.92096	9.95472e-34	2.55578e-30	scaf8	5995152	6001614	+	1395	-	GO:0016020;GO:0016021;GO:0016021;	K14209	-	-	-	-	101746014
BGIBMGA009376	250.365	58.4463	442.283	7.56735	2.91979	4.40111e-31	8.071e-28	scaf53	1921994	1924630	+	1278	-	GO:0005215;GO:0005215;GO:0016020;GO:0016021;GO:0016021;GO:0016021;GO:0022857;GO:0022857;GO:0055085;GO:0055085;	-	-	-	-	-	-
BGIBMGA006322	146.583	20.059	273.106	13.6151	3.76714	1.6229e-30	2.31479e-27	scaf49	1670887	1675983	+	816	-	GO:0004383;GO:0004383;GO:0005622;GO:0005622;GO:0006182;GO:0006182;GO:0009190;GO:0009190;GO:0016849;GO:0016849;GO:0035556;GO:0035556;	-	-	-	-	-	-
BGIBMGA011589	4334.24	2204.88	6463.6	2.93149	1.55163	8.52986e-27	9.95435e-24	scaf22	4875833	4877474	+	351	-	-	-	-	-	-	-	101740613
BGIBMGA009310	853.799	382.847	1324.75	3.46026	1.79088	1.25959e-25	1.34745e-22	scaf53	2519707	2521644	-	1938	-	GO:0004672;GO:0004672;GO:0005524;GO:0005524;GO:0006468;GO:0006468;	-	-	-	-	-	-
BGIBMGA006555	1618.44	820.767	2416.11	2.94373	1.55764	1.36935e-23	1.17189e-20	scaf10	6600624	6624320	-	3819	-	GO:0000166;GO:0000166;GO:0004016;GO:0004016;GO:0005622;GO:0005622;GO:0005886;GO:0005886;GO:0006171;GO:0006171;GO:0009190;GO:0009190;GO:0016020;GO:0016021;GO:0016021;GO:0016829;GO:0016849;GO:0016849;GO:0035556;GO:0035556;	-	-	-	-	-	-
BGIBMGA001621	368.583	125.533	611.633	4.87229	2.2846	2.50255e-23	1.88972e-20	scaf35	3545812	3565702	-	1992	-	GO:0003676;GO:0003676;	-	-	-	-	-	-
BGIBMGA006321	106.035	16.0664	196.003	12.1996	3.60876	1.85804e-22	1.01163e-19	scaf49	1656756	1669293	+	720	-	GO:0004383;GO:0004383;GO:0006182;GO:0006182;GO:0020037;GO:0020037;	-	-	-	-	-	-
BGIBMGA007572	268.798	90.2348	447.361	4.95774	2.30968	1.89135e-22	1.01163e-19	scaf66	858855	869555	+	1362	-	GO:0016020;GO:0016021;GO:0016021;GO:0016021;GO:0055085;GO:0055085;	-	-	-	-	-	-
BGIBMGA011483	236.03	77.0277	395.032	5.12843	2.35852	9.94959e-22	4.91242e-19	scaf22	1139263	1140291	-	1029	-	GO:0016787;GO:0016787;	-	-	-	-	-	-
BGIBMGA004340	490.441	215.781	765.101	3.54572	1.82608	2.05745e-21	9.43267e-19	scaf79	1307756	1309383	+	327	-	GO:0005576;GO:0005576;GO:0010466;GO:0030414;GO:0030414;	-	-	-	-	-	-
BGIBMGA010772	400.145	166.779	633.511	3.7985	1.92543	6.30118e-21	2.78925e-18	scaf25	301924	303170	-	369	-	-	-	-	-	-	-	-
BGIBMGA012609	469.546	207.27	731.823	3.53077	1.81998	8.20819e-21	3.51228e-18	scaf100	712063	713367	+	1305	-	GO:0000166;GO:0005524;GO:0005524;GO:0005524;	K22399	-	-	-	AAA family ATPase[Source:UniProtKB/TrEMBL;Acc:Q1HQ67]	732909
BGIBMGA012521	67.1526	4.73386	129.571	27.3711	4.77458	9.00088e-21	3.71735e-18	scaf183	149994	152645	+	939	-	GO:0005576;GO:0005576;	K19919	-	-	-	-	101746572
BGIBMGA010918	602.913	280.459	925.366	3.29947	1.72224	9.26659e-21	3.71735e-18	scaf68	1318446	1325790	-	762	-	GO:0006629;GO:0006631;GO:0006633;GO:0006633;GO:0016020;GO:0016021;GO:0016021;GO:0016021;GO:0016740;GO:0102336;GO:0102336;GO:0102337;GO:0102337;GO:0102338;GO:0102338;GO:0102756;GO:0102756;	-	-	-	-	-	-
BGIBMGA014193	503.738	225.317	782.159	3.47137	1.79551	1.19392e-20	4.50775e-18	scaf99	1188671	1190266	+	1596	-	GO:0006479;GO:0006479;GO:0008168;GO:0008168;GO:0008168;GO:0016740;GO:0032259;	K05931	EC:2.1.1.319	-	-	-	101737538
BGIBMGA003747	1377.79	742.896	2012.69	2.70925	1.4379	5.39552e-20	1.92395e-17	scaf9	7415673	7421508	+	1578	-	GO:0005634;GO:0005634;	K21770	-	-	-	Cyclin B homolog[Source:UniProtKB/TrEMBL;Acc:P92162]	692763
BGIBMGA005151	915.305	471.882	1358.73	2.87938	1.52576	1.27887e-19	4.32022e-17	scaf32	2848376	2856304	+	2028	-	GO:0000166;GO:0003677;GO:0003677;GO:0003677;GO:0003688;GO:0003688;GO:0004386;GO:0004386;GO:0005524;GO:0005524;GO:0005524;GO:0005634;GO:0005634;GO:0005634;GO:0006260;GO:0006260;GO:0006260;GO:0006270;GO:0006270;GO:0016787;GO:0042555;GO:0042555;	-	-	-	-	-	-
BGIBMGA013623	341.69	144.932	538.447	3.71517	1.89343	8.12757e-19	2.60834e-16	scaf78	548545	551042	+	321	-	GO:0006368;GO:0006368;GO:0030891;GO:0030891;GO:0070449;GO:0070449;	-	-	-	-	-	-
BGIBMGA013134	1199.37	652.71	1746.03	2.67505	1.41957	1.00407e-18	3.1437e-16	scaf124	177740	181773	+	960	CDC2	GO:0000166;GO:0004672;GO:0004672;GO:0004674;GO:0004674;GO:0005524;GO:0005524;GO:0005524;GO:0006468;GO:0006468;	K02087	-	-	-	Bm cdc2 [Source:UniProtKB/TrEMBL;Acc:O17507]"	693060
BGIBMGA004711	1099.55	593.686	1605.42	2.70416	1.43518	1.6844e-18	5.14825e-16	scaf108	400604	406369	+	1371	-	GO:0000166;GO:0003678;GO:0003678;GO:0004386;GO:0005524;GO:0005524;GO:0005524;GO:0005634;GO:0006281;GO:0006281;GO:0006325;GO:0006325;GO:0006351;GO:0006355;GO:0006974;GO:0016787;GO:0031011;GO:0031011;GO:0032508;GO:0035267;GO:0035267;GO:0043141;GO:0043141;GO:0097255;GO:0097255;	K04499	-	-	-	-	101739823
BGIBMGA011897	546.671	264.655	828.686	3.13119	1.64671	1.88744e-18	5.63468e-16	scaf59	2001517	2002739	-	492	-	GO:0006974;GO:0006974;GO:0051726;GO:0051726;	-	-	-	-	-	-
BGIBMGA006763	1430.71	805.728	2055.7	2.55136	1.35127	7.42491e-18	2.07203e-15	scaf10	5624914	5635200	+	5955	-	-	-	-	-	-	-	-
BGIBMGA008397	541.978	155.591	928.366	5.96672	2.57694	6.1813e-17	1.58699e-14	scaf2	877849	879199	-	963	CPG39	-	-	-	-	-	Putative cuticle protein CPG39[Source:UniProtKB/TrEMBL;Acc:D0VEN4]	101745386
BGIBMGA001806	925.327	510.184	1340.47	2.62743	1.39365	7.42433e-17	1.86608e-14	scaf35	3052294	3054233	+	684	-	GO:0003729;GO:0003729;GO:0005849;GO:0005849;GO:0006378;GO:0006378;GO:0016787;GO:0016787;	K14397	-	-	-	Cleavage and polyadenylation specific factor 5[Source:UniProtKB/TrEMBL;Acc:Q1HQ96]	732888
BGIBMGA003927	56.6994	2.7351	110.664	40.4606	5.33844	8.16279e-17	1.97709e-14	scaf249	41510	53374	+	1299	FMO3	GO:0004497;GO:0004499;GO:0004499;GO:0016491;GO:0050660;GO:0050660;GO:0050661;GO:0050661;GO:0055114;GO:0055114;GO:0055114;	-	-	-	-	Flavin-dependent monooxygenase FMO3A[Source:UniProtKB/TrEMBL;Acc:D7PGZ6]	-
BGIBMGA002396	232.102	91.7887	372.415	4.0573	2.02052	1.0298e-16	2.44807e-14	scaf14	3534217	3542733	-	657	-	-	-	-	-	-	-	101738673
BGIBMGA006173	1293.48	740.736	1846.23	2.49243	1.31755	1.14607e-16	2.67492e-14	scaf5	5761547	5762644	+	867	-	GO:0003676;GO:0003676;GO:0003746;GO:0003746;GO:0005634;GO:0005634;GO:0005634;GO:0006351;GO:0006351;GO:0006355;GO:0006355;GO:0006414;GO:0008270;GO:0008270;GO:0046872;	K03145	-	-	-	Transcription elongation factor S-II[Source:UniProtKB/TrEMBL;Acc:Q1HQ13]	732942
BGIBMGA000391	1188.16	681.036	1695.29	2.48928	1.31573	1.38968e-16	3.1297e-14	scaf18	1492145	1508728	+	2928	-	GO:0003824;GO:0003824;GO:0004375;GO:0004375;GO:0004375;GO:0005739;GO:0005739;GO:0006520;GO:0006520;GO:0006544;GO:0006544;GO:0006546;GO:0006546;GO:0016491;GO:0016829;GO:0016829;GO:0055114;GO:0055114;GO:0055114;	-	-	-	-	-	-
BGIBMGA010713	54.8244	4.77689	104.872	21.954	4.45641	1.63221e-16	3.61252e-14	scaf25	4292919	4324576	-	2265	-	GO:0000166;GO:0000166;GO:0004383;GO:0004383;GO:0005622;GO:0005622;GO:0006182;GO:0006182;GO:0009190;GO:0009190;GO:0016829;GO:0016849;GO:0016849;GO:0020037;GO:0020037;GO:0035556;GO:0035556;	-	-	-	-	-	-
BGIBMGA005895	438.819	214.974	662.663	3.08253	1.62412	2.02699e-16	4.41025e-14	scaf67	1304895	1307100	+	513	-	-	-	-	-	-	-	-
BGIBMGA008689	1027.1	581.999	1472.21	2.52957	1.33889	4.31542e-16	9.04737e-14	scaf90	261948	268641	-	1290	-	GO:0001522;GO:0001522;GO:0003723;GO:0003723;GO:0008033;GO:0008033;GO:0009451;GO:0009451;GO:0009982;GO:0009982;GO:0016853;	-	-	-	-	tRNA pseudouridine synthase[Source:UniProtKB/TrEMBL;Acc:H9JGP2]	-
BGIBMGA002988	304.242	137.936	470.548	3.41134	1.77034	5.09625e-16	1.03842e-13	scaf13	4907488	4913847	-	525	-	GO:0016020;GO:0016020;GO:0016020;GO:0016021;GO:0016021;GO:0022857;GO:0022857;GO:0055085;GO:0055085;	-	-	-	-	-	-
BGIBMGA001437	3261.12	2002.27	4519.97	2.25742	1.17467	5.91075e-16	1.14964e-13	scaf7	4137459	4138391	-	933	-	GO:0003743;GO:0003743;GO:0003743;GO:0006413;GO:0006413;GO:0006413;	K03238	-	-	-	Eukaryotic translation initiation factor 2 subunit2 [Source:UniProtKB/TrEMBL;Acc:Q0ZB78]	733143
BGIBMGA003385	1953.97	1176.02	2731.93	2.32303	1.21601	7.84348e-16	1.50279e-13	scaf42	415187	420533	+	1380	-	GO:0004672;GO:0004672;GO:0005515;GO:0005524;GO:0005524;GO:0006468;GO:0006468;	-	-	-	-	-	-
BGIBMGA010333	634.078	340.019	928.138	2.72967	1.44873	8.39956e-16	1.58566e-13	scaf109	84654	88531	+	684	-	GO:0000398;GO:0000398;GO:0003676;GO:0003676;GO:0003723;GO:0003723;GO:0003723;GO:0046872;GO:0046872;GO:0046872;GO:0089701;GO:0089701;	K12836	-	-	-	-	101742886
BGIBMGA002350	657.236	355.124	959.348	2.70145	1.43373	9.50317e-16	1.74275e-13	scaf337	13927	17080	+	759	-	GO:0000166;GO:0000278;GO:0004672;GO:0004672;GO:0004674;GO:0004674;GO:0004674;GO:0005524;GO:0005524;GO:0005524;GO:0006468;GO:0006468;GO:0007094;GO:0007094;GO:0031577;GO:0032133;GO:0032133;GO:0032467;GO:0032467;GO:0043988;GO:0043988;	-	-	-	-	-	-
BGIBMGA010154	798.123	444.058	1152.19	2.59468	1.37556	1.23901e-15	2.24016e-13	scaf15	2534231	2534834	-	444	-	GO:0004170;GO:0004170;GO:0046080;GO:0046080;	K01520	EC:3.6.1.23	-	-	-	101741979
BGIBMGA003004	4115.9	2576	5655.8	2.19557	1.1346	2.98306e-15	5.24569e-13	scaf13	4326807	4327346	-	540	-	-	-	-	-	-	-	-
BGIBMGA002461	1002.84	583.085	1422.6	2.43979	1.28675	5.63754e-15	9.64922e-13	scaf14	804246	805397	+	594	-	GO:0003824;GO:0003824;GO:0005975;GO:0005975;GO:0016857;GO:0016857;	-	-	-	-	-	-
BGIBMGA011834	1069.81	318.97	1820.66	5.70792	2.51297	6.54078e-15	1.09044e-12	scaf16	3063466	3068706	+	678	-	GO:0008113;GO:0008113;GO:0055114;GO:0055114;	-	-	-	-	-	-
BGIBMGA011538	1747.45	1066.58	2428.31	2.27674	1.18697	7.00146e-15	1.15228e-12	scaf22	1466014	1476174	+	4179	-	-	-	-	-	-	-	-
BGIBMGA014117	1012.77	591.161	1434.38	2.42638	1.2788	7.84612e-15	1.27494e-12	scaf76	70699	75695	-	690	-	GO:0016311;GO:0016791;GO:0016791;	-	-	-	-	-	-
BGIBMGA013510	2005.15	509.004	3501.29	6.8787	2.78214	1.25094e-14	1.93473e-12	scaf101	165625	174329	+	1128	BMRNRS	GO:0009263;GO:0009263;GO:0016491;GO:0016491;GO:0055114;GO:0055114;	K10808	EC:1.17.4.1	-	-	Ribonucleoside diphosphate reductase small subunit[Source:UniProtKB/TrEMBL;Acc:H9JVE7]	100873153
BGIBMGA001789	163.187	60.359	266.015	4.40722	2.13987	1.65719e-14	2.50274e-12	scaf35	2325184	2338230	+	2283	-	GO:0008270;GO:0008270;GO:0046872;	-	-	-	-	-	-
BGIBMGA007169	1583.93	968.606	2199.26	2.27054	1.18303	1.90429e-14	2.84248e-12	scaf74	353343	359414	-	579	BRAS1	GO:0000166;GO:0003924;GO:0003924;GO:0005525;GO:0005525;GO:0005525;GO:0007165;GO:0007165;GO:0016020;GO:0016020;	K07827	-	-	-	Ras oncoprotein[Source:UniProtKB/TrEMBL;Acc:Q5KT36]	692520
BGIBMGA008532	1891.57	1171.47	2611.66	2.22938	1.15665	2.68189e-14	3.95717e-12	scaf2	8307607	8308493	+	564	-	-	-	-	-	-	-	-
BGIBMGA002870	307.261	148.279	466.243	3.14436	1.65277	4.15854e-14	5.99811e-12	scaf30	782490	785396	+	2907	-	GO:0000166;GO:0000723;GO:0000723;GO:0003676;GO:0003676;GO:0003677;GO:0003677;GO:0003677;GO:0004003;GO:0004003;GO:0004003;GO:0004386;GO:0005524;GO:0005524;GO:0005524;GO:0005634;GO:0005634;GO:0005634;GO:0006139;GO:0006139;GO:0006260;GO:0006260;GO:0006281;GO:0006281;GO:0006281;GO:0006310;GO:0006310;GO:0006974;GO:0008026;GO:0008026;GO:0010569;GO:0010569;GO:0016787;GO:0016818;GO:0016818;GO:0032508;GO:…	K11136	EC:3.6.4.12	-	-	-	101736870
BGIBMGA010621	1667.4	1038.58	2296.22	2.21093	1.14465	8.24959e-14	1.11474e-11	scaf84	916712	921764	-	2397	BMO.4128	GO:0000166;GO:0004748;GO:0004748;GO:0004748;GO:0005524;GO:0005524;GO:0005524;GO:0006260;GO:0006260;GO:0006260;GO:0016491;GO:0055114;GO:0055114;GO:0055114;	K10807	EC:1.17.4.1	-	-	Ribonucleoside-diphosphate reductase[Source:UniProtKB/TrEMBL;Acc:H9JM68]	101741714
BGIBMGA005594	790.286	458.727	1121.85	2.44556	1.29017	8.87759e-14	1.1871e-11	scaf33	72565	86332	-	2991	-	GO:0005515;GO:0007051;GO:0007051;	-	-	-	-	-	-
BGIBMGA007587	590.899	331.646	850.152	2.56343	1.35808	1.02154e-13	1.35191e-11	scaf66	1556836	1564132	+	2097	-	GO:0004518;GO:0004518;GO:0006281;GO:0006281;GO:0090305;	-	-	-	-	-	-
BGIBMGA014067	258.724	121.703	395.746	3.25174	1.70121	1.38732e-13	1.81725e-11	scaf251	2977	18451	-	1548	-	-	-	-	-	-	-	-
BGIBMGA013010	824.798	436.331	1213.26	2.7806	1.4754	1.58104e-13	2.00948e-11	scaf4	4682802	4687135	+	924	-	GO:0016787;GO:0016787;	K15423	EC:3.1.3.16	-	-	-	101742306
BGIBMGA011521	1130.44	692.885	1567.99	2.26299	1.17823	1.67929e-13	2.11073e-11	scaf22	610251	618137	+	1785	-	GO:0000166;GO:0004066;GO:0004066;GO:0005524;GO:0005524;GO:0006529;GO:0006529;GO:0006529;GO:0006541;GO:0006541;GO:0008652;	-	-	-	-	Asparagine synthetase[Source:UniProtKB/TrEMBL;Acc:H9JPR6]	-
BGIBMGA011193	817.066	484.964	1149.17	2.36959	1.24464	1.69358e-13	2.11073e-11	scaf12	5097413	5100019	-	2607	-	GO:0000166;GO:0000915;GO:0000915;GO:0003774;GO:0003777;GO:0003777;GO:0005524;GO:0005524;GO:0005524;GO:0005874;GO:0005874;GO:0007018;GO:0007018;GO:0008017;GO:0008017;GO:0072383;GO:0072383;	-	-	-	-	-	-
BGIBMGA000680	2057.37	1306.72	2808.01	2.1489	1.1036	1.90022e-13	2.34549e-11	scaf8	4233301	4237337	+	1269	-	GO:0000166;GO:0003824;GO:0003824;GO:0004356;GO:0004356;GO:0004356;GO:0005524;GO:0005524;GO:0006542;GO:0006542;GO:0006807;GO:0006807;GO:0016874;	-	-	-	-	Glutamine synthetase[Source:UniProtKB/TrEMBL;Acc:H9ITV0]	-
BGIBMGA011784	545.293	305.323	785.263	2.57191	1.36284	1.99079e-13	2.43388e-11	scaf16	1300452	1304777	+	3915	-	GO:0003676;GO:0003676;GO:0005524;GO:0005524;GO:0006310;GO:0006310;GO:0008026;GO:0008026;GO:0008270;GO:0008270;	-	-	-	-	-	-
BGIBMGA009323	432.716	233.325	632.108	2.70912	1.43783	2.12976e-13	2.5761e-11	scaf53	1729955	1737712	-	732	-	GO:0004616;GO:0050661;GO:0050661;	-	-	-	-	-	-
BGIBMGA009159	820.088	486.471	1153.71	2.37158	1.24585	2.14725e-13	2.5761e-11	scaf96	1222609	1225793	+	474	-	GO:0016020;GO:0016021;GO:0016021;	-	-	-	-	-	-
BGIBMGA003396	1038.98	635.224	1442.73	2.27121	1.18346	4.66435e-13	5.34609e-11	scaf42	961368	970034	+	4140	-	GO:0000166;GO:0000166;GO:0001882;GO:0001882;GO:0003676;GO:0003676;GO:0003677;GO:0003677;GO:0003677;GO:0003887;GO:0003887;GO:0003887;GO:0005634;GO:0005634;GO:0006260;GO:0006260;GO:0006260;GO:0016740;GO:0016779;GO:0046872;GO:0046872;GO:0051536;GO:0051539;GO:0051539;GO:0071897;	-	-	-	-	DNA polymerase[Source:UniProtKB/TrEMBL;Acc:H9J1K9]	-
BGIBMGA000291	457.089	251.654	662.524	2.63268	1.39653	5.36578e-13	6.00913e-11	scaf18	2818188	2839441	-	852	-	GO:0006629;GO:0006631;GO:0006633;GO:0006633;GO:0016020;GO:0016021;GO:0016021;GO:0016021;GO:0016740;GO:0102336;GO:0102336;GO:0102337;GO:0102337;GO:0102338;GO:0102338;GO:0102756;GO:0102756;	-	-	-	-	-	-
BGIBMGA013204	319.504	162.615	476.394	2.92959	1.5507	6.52816e-13	7.22431e-11	scaf39	158652	162235	-	1755	-	GO:0003723;GO:0003723;	-	-	-	-	-	-
BGIBMGA010931	468.284	260.036	676.533	2.60169	1.37945	7.29985e-13	7.94137e-11	scaf68	660047	665217	-	2529	-	GO:0000166;GO:0003774;GO:0003777;GO:0003777;GO:0005524;GO:0005524;GO:0005524;GO:0007018;GO:0007018;GO:0008017;GO:0008017;	-	-	-	-	-	-
BGIBMGA000475	7231.7	3990.91	10472.5	2.62408	1.39181	9.92142e-13	1.05257e-10	scaf18	5806256	5810434	+	1197	CRT	GO:0005509;GO:0005509;GO:0005515;GO:0005783;GO:0005783;GO:0005783;GO:0006457;GO:0006457;GO:0051082;GO:0051082;	-	-	-	-	Calreticulin [Source:UniProtKB/Swiss-Prot;Acc:Q7Z1E6]	-
BGIBMGA004109	1226.83	769.091	1684.58	2.19035	1.13116	1.25281e-12	1.28658e-10	scaf36	2436436	2438390	+	1893	-	GO:0003676;GO:0003676;GO:0003723;GO:0003723;	-	-	-	-	-	-
BGIBMGA004140	313.397	111.073	515.721	4.64308	2.21508	1.41246e-12	1.40556e-10	scaf36	3943021	3944694	+	1674	-	GO:0016874;GO:0016874;	K01969	EC:6.4.1.4	-	-	-	101744540
BGIBMGA007194	573.481	332.33	814.633	2.45128	1.29354	1.42496e-12	1.40709e-10	scaf74	323731	336549	+	2817	-	GO:0000166;GO:0003677;GO:0004176;GO:0004176;GO:0004176;GO:0004252;GO:0004252;GO:0004252;GO:0005524;GO:0005524;GO:0005524;GO:0005739;GO:0005759;GO:0005759;GO:0006508;GO:0006508;GO:0006508;GO:0006515;GO:0006515;GO:0006515;GO:0008233;GO:0008236;GO:0016787;GO:0016887;GO:0030163;GO:0030163;GO:0034599;GO:0034599;GO:0043565;GO:0043565;GO:0051131;GO:0051131;GO:0070407;GO:0070407;	-	-	-	-	Lon protease homolog, mitochondrial[Source:UniProtKB/TrEMBL;Acc:H9JCE9]	-
BGIBMGA003017	831.523	505.741	1157.31	2.28834	1.1943	1.52155e-12	1.491e-10	scaf13	3978617	3982749	-	1989	-	GO:0003824;GO:0003824;GO:0008152;	-	-	-	-	-	-
BGIBMGA006109	784.513	418.266	1150.76	2.75126	1.46009	1.53416e-12	1.49197e-10	scaf5	1316675	1319087	+	576	-	GO:0005634;GO:0005634;GO:0005634;	-	-	-	-	-	-
BGIBMGA003178	1001.02	623.862	1378.18	2.20911	1.14347	1.71447e-12	1.63027e-10	scaf13	4953361	4971084	+	1494	-	GO:0016020;GO:0016020;GO:0016020;GO:0016021;GO:0016021;GO:0022857;GO:0022857;GO:0055085;GO:0055085;	-	-	-	-	-	101739980
BGIBMGA010298	356.958	189.488	524.429	2.76762	1.46864	1.73064e-12	1.63355e-10	scaf127	486589	492604	-	405	-	-	-	-	-	-	-	-
BGIBMGA001238	669.476	397.193	941.76	2.37104	1.24552	1.82163e-12	1.69451e-10	scaf1	10852173	10868852	+	2058	-	GO:0000166;GO:0000166;GO:0004812;GO:0004812;GO:0004817;GO:0004817;GO:0005524;GO:0005524;GO:0006418;GO:0006418;GO:0006423;GO:0006423;	-	-	-	-	-	-
BGIBMGA003355	291.891	148.714	435.068	2.92553	1.5487	2.32343e-12	2.11531e-10	scaf42	669972	676803	-	924	-	GO:0005525;GO:0005525;	K16185	-	-	-	-	101742921
BGIBMGA000419	290.341	126.212	454.471	3.60087	1.84834	2.37225e-12	2.14455e-10	scaf18	2737892	2745506	+	972	-	GO:0003857;GO:0003857;GO:0006631;GO:0006631;GO:0016491;GO:0016491;GO:0055114;GO:0055114;GO:0070403;GO:0070403;	K13247	EC:1.1.1.45	-	-	-	101740023
BGIBMGA012352	119.391	42.4659	196.316	4.6229	2.2088	2.66547e-12	2.37616e-10	scaf26	3591183	3595945	+	432	-	GO:0003677;GO:0003677;GO:0016589;GO:0016589;GO:0071339;GO:0071339;	-	-	-	-	-	101738367
BGIBMGA004787	602.457	354.856	850.058	2.3955	1.26033	2.85019e-12	2.52331e-10	scaf46	2781271	2787076	-	3498	-	GO:0007052;	-	-	-	-	-	-
BGIBMGA007739	1503.78	912.45	2095.1	2.29613	1.1992	2.90356e-12	2.55294e-10	scaf3	902263	902736	-	474	-	-	K15730	EC:5.3.99.3	-	-	-	101746199
BGIBMGA000964	1071.24	672.741	1469.73	2.18469	1.12743	3.38916e-12	2.93964e-10	scaf1	8153334	8163530	-	5865	-	-	-	-	-	-	-	-
BGIBMGA007186	177.264	77.0326	277.495	3.6023	1.84892	3.47486e-12	2.99375e-10	scaf74	13087	16744	-	2931	-	-	-	-	-	-	-	-
BGIBMGA013005	1004.03	454.032	1554.02	3.42271	1.77514	7.2176e-12	5.82719e-10	scaf4	4592193	4595976	+	1812	-	GO:0016614;GO:0016614;GO:0050660;GO:0050660;GO:0055114;GO:0055114;	-	-	-	-	-	-
BGIBMGA010495	895.951	559.234	1232.67	2.20421	1.14026	8.34828e-12	6.65633e-10	scaf6	99875	104153	+	1722	-	GO:0005515;	-	-	-	-	-	-
BGIBMGA000447	590.838	352.093	829.584	2.35615	1.23643	9.04818e-12	7.12586e-10	scaf18	3845351	3859777	+	2637	-	GO:0005524;GO:0005524;GO:0016887;GO:0035494;	-	-	-	-	-	-
BGIBMGA003746	1099.47	699.809	1499.13	2.1422	1.0991	9.2852e-12	7.22388e-10	scaf9	7400897	7402390	+	1272	-	-	-	-	-	-	-	101740936
BGIBMGA011609	140.531	56.8778	224.184	3.9415	1.97874	9.74832e-12	7.53851e-10	scaf16	5792456	5799259	-	1281	-	GO:0004553;GO:0004553;GO:0005975;GO:0005975;GO:0030246;GO:0030246;	-	-	-	-	-	-
BGIBMGA005052	1131.97	724.865	1539.08	2.12326	1.08628	1.11081e-11	8.43755e-10	scaf32	2702082	2706063	-	792	-	-	-	-	-	-	-	-
BGIBMGA001695	897.149	404.93	1389.37	3.43113	1.77869	1.85938e-11	1.37177e-09	scaf35	496476	501713	-	1953	-	GO:0003824;GO:0003824;GO:0004559;GO:0004559;GO:0005975;GO:0005975;GO:0006013;GO:0006013;GO:0030246;GO:0030246;	-	-	-	-	-	-
BGIBMGA007152	291.211	154.137	428.284	2.7786	1.47436	2.16403e-11	1.57839e-09	scaf74	905871	912714	-	1341	-	GO:0005515;	K11803	-	-	-	-	101740776
BGIBMGA010168	56.4065	11.7246	101.088	8.62187	3.108	3.55668e-11	2.52249e-09	scaf15	1481095	1482625	-	1311	PP-BP	GO:0005576;GO:0005576;	-	-	-	-	30K protein 13; Putative paralytic peptide-bindingprotein [Source:UniProtKB/TrEMBL;Acc:Q2PQU4]	692790
BGIBMGA010003	41.0213	5.34112	76.7015	14.3606	3.84404	3.90777e-11	2.74121e-09	scaf45	3211104	3211639	-	210	-	GO:0003839;GO:0003839;GO:0003839;GO:0006751;GO:0006751;GO:0006751;GO:0016829;	-	-	-	-	-	-
BGIBMGA000408	316.258	172.981	459.534	2.65656	1.40956	4.32924e-11	2.99766e-09	scaf18	2365500	2367032	+	1533	CAMKII	GO:0004672;GO:0004672;GO:0004674;GO:0004674;GO:0004683;GO:0004683;GO:0005516;GO:0005516;GO:0005524;GO:0005524;GO:0006468;GO:0006468;GO:0016301;GO:0016310;	K04515	EC:2.7.11.17	-	-	Ca2+/calmodulin-dependent protein kinase II[Source:UniProtKB/TrEMBL;Acc:D6RVR8]	100462731
BGIBMGA012391	129.652	52.2779	207.027	3.96012	1.98554	5.36971e-11	3.63514e-09	scaf82	997862	1018383	+	1893	-	GO:0005794;GO:0008376;GO:0008376;GO:0016740;GO:0032580;GO:0032580;GO:0032580;	-	-	-	-	-	-
BGIBMGA003229	360.148	203.33	516.966	2.54249	1.34624	6.36186e-11	4.23146e-09	scaf73	984456	986959	-	2358	-	GO:0004420;GO:0004420;GO:0008299;GO:0008299;GO:0015936;GO:0015936;GO:0016020;GO:0016021;GO:0016021;GO:0016021;GO:0016616;GO:0016616;GO:0050661;GO:0050661;GO:0050662;GO:0050662;GO:0055114;GO:0055114;	-	-	-	-	-	-
BGIBMGA005011	244.733	126.393	363.072	2.87256	1.52233	7.31654e-11	4.79196e-09	scaf32	4153137	4153502	-	366	-	-	-	-	-	-	-	101738514
BGIBMGA001273	47.9099	8.76953	87.0504	9.92646	3.31128	8.09208e-11	5.24636e-09	scaf1	12952569	12956594	+	699	-	GO:0016491;GO:0016491;GO:0055114;GO:0055114;	-	-	-	-	-	-
BGIBMGA007950	5042.57	2827.02	7258.11	2.56741	1.36031	1.06334e-10	6.79108e-09	scaf3	8362275	8364610	+	1968	HSP70	GO:0000166;GO:0005524;GO:0005524;	-	-	-	-	Heat shock protein 70-3[Source:UniProtKB/TrEMBL;Acc:F8UN44]	-
BGIBMGA006677	488.994	261.092	716.897	2.74576	1.45721	1.11992e-10	7.11705e-09	scaf10	543515	545744	+	963	-	GO:0000278;GO:0000278;GO:0004672;GO:0004672;GO:0004674;GO:0004674;GO:0005524;GO:0005524;GO:0006468;GO:0006468;	K08865	EC:2.7.12.2	-	-	-	101736944
BGIBMGA011461	564.434	315.494	813.373	2.5781	1.36631	1.307e-10	8.18438e-09	scaf22	2419145	2420212	-	1068	-	GO:0003677;GO:0003677;GO:0006260;GO:0006260;	K10756	-	-	-	-	101735712
BGIBMGA013631	338.176	191.567	484.784	2.53062	1.33949	1.63382e-10	1.01321e-08	scaf78	875763	890597	+	1122	-	GO:0003824;GO:0003824;GO:0050662;GO:0050662;	-	-	-	-	-	692916
BGIBMGA007045	283.251	154.572	411.931	2.66498	1.41412	1.69084e-10	1.04353e-08	scaf21	612053	624850	-	3531	-	GO:0005515;GO:0007009;GO:0007009;	-	-	-	-	-	-
BGIBMGA012953	227.54	118.791	336.29	2.83095	1.50129	2.94682e-10	1.68877e-08	scaf4	2303103	2305431	+	858	-	GO:0016020;GO:0016021;GO:0016021;	-	-	-	-	-	-
BGIBMGA013781	969.556	623.127	1315.98	2.11191	1.07855	3.0713e-10	1.74453e-08	scaf47	544622	544966	+	345	-	-	-	-	-	-	-	101746322
BGIBMGA000799	327.532	187.813	467.25	2.48784	1.31489	3.31514e-10	1.86651e-08	scaf89	611272	615225	+	1407	-	-	-	-	-	-	-	-
BGIBMGA008443	842.191	548.498	1135.88	2.0709	1.05026	3.39544e-10	1.90337e-08	scaf2	1823020	1824613	+	1071	-	GO:0005634;GO:0005634;GO:0031144;GO:0031144;GO:0071630;GO:0071630;	-	-	-	-	-	101738001
BGIBMGA012206	1245.39	584.773	1906.02	3.25942	1.70461	3.88804e-10	2.1332e-08	scaf75	1563569	1571407	+	1335	-	GO:0005515;GO:0046983;GO:0046983;	-	-	-	-	-	-
BGIBMGA004268	107.957	42.552	173.362	4.07412	2.02649	3.96738e-10	2.1672e-08	scaf79	1470860	1486154	-	2646	-	GO:0003676;GO:0003676;	K11268	EC:2.3.1.-	-	-	-	101742011
BGIBMGA007331	296.597	166	427.194	2.57345	1.36371	4.44787e-10	2.40917e-08	scaf55	2487833	2490314	-	1659	-	GO:0003690;GO:0003697;GO:0005634;GO:0005634;GO:0006260;GO:0006260;GO:0006270;	-	-	-	-	-	-
BGIBMGA006681	690.512	443.465	937.56	2.11417	1.08009	5.01099e-10	2.70278e-08	scaf10	1483366	1484322	+	957	-	GO:0000166;GO:0004672;GO:0004672;GO:0004674;GO:0004674;GO:0005524;GO:0005524;GO:0005524;GO:0006468;GO:0006468;GO:0007049;	-	-	-	-	-	-
BGIBMGA006630	223.848	118.183	329.512	2.78814	1.4793	6.27451e-10	3.37012e-08	scaf10	2971867	2973790	-	1314	-	-	-	-	-	-	-	-
BGIBMGA008466	37.4873	5.25507	69.7196	13.2671	3.72978	6.67025e-10	3.55295e-08	scaf2	3708770	3709795	+	1026	-	-	-	-	-	-	-	-
BGIBMGA006942	386.375	212.464	560.286	2.63709	1.39895	6.7759e-10	3.59431e-08	scaf44	873215	874389	+	1008	-	GO:0003676;GO:0003676;	K09195	-	-	-	-	101741557
BGIBMGA013768	142.194	64.5237	219.865	3.4075	1.76871	7.92425e-10	4.13511e-08	scaf47	101209	103046	-	843	-	GO:0016020;GO:0016021;GO:0016021;	-	-	-	-	-	-
BGIBMGA001001	50.1805	11.0744	89.2867	8.06246	3.01122	9.77486e-10	4.90156e-08	scaf1	6071748	6072329	-	582	-	GO:0003677;GO:0003677;GO:0006357;GO:0006357;GO:0046983;GO:0046983;	-	-	-	-	-	-
BGIBMGA006393	253.192	137.951	368.433	2.67075	1.41725	1.0232e-09	5.09103e-08	scaf11	2679608	2681040	-	1344	-	GO:0003677;GO:0003677;GO:0003677;GO:0005634;GO:0005634;GO:0006355;GO:0006355;GO:0043565;GO:0043565;	-	-	-	-	-	-
BGIBMGA003310	774.758	505.89	1043.63	2.06295	1.04471	1.13664e-09	5.63359e-08	scaf42	3124033	3133228	-	4794	-	GO:0003676;GO:0003676;GO:0005634;GO:0005634;GO:0008270;GO:0008270;	-	-	-	-	-	-
BGIBMGA011755	1619.3	907.913	2330.69	2.56709	1.36013	1.68268e-09	8.21312e-08	scaf16	495913	498991	+	1587	-	GO:0004672;GO:0004672;GO:0004674;GO:0004674;GO:0005524;GO:0005524;GO:0006468;GO:0006468;	-	-	-	-	-	-
BGIBMGA011290	437.03	270.311	603.749	2.23353	1.15933	1.82908e-09	8.86036e-08	scaf12	1238482	1242210	-	2208	-	-	-	-	-	-	-	-
BGIBMGA006172	371.052	222.529	519.574	2.33486	1.22334	2.064e-09	9.92342e-08	scaf5	5742994	5744164	+	645	-	-	-	-	-	-	-	101744473
BGIBMGA010912	754.499	497.612	1011.39	2.03248	1.02324	2.09624e-09	9.98125e-08	scaf68	2029458	2033463	-	1290	-	-	-	-	-	-	-	101735996
BGIBMGA003909	189.319	96.9626	281.675	2.90499	1.53853	2.09935e-09	9.98125e-08	scaf114	448445	450932	-	681	-	GO:0000166;GO:0005524;GO:0005524;GO:0005524;GO:0006139;GO:0006139;GO:0009165;GO:0019206;GO:0019206;	K05961	EC:2.7.1.145	-	-	-	101741300
BGIBMGA001130	129.372	58.0111	200.734	3.46027	1.79088	2.18732e-09	1.0323e-07	scaf1	4638260	4660819	+	1062	-	GO:0006812;GO:0006812;GO:0008324;GO:0008324;GO:0016020;GO:0016021;GO:0016021;GO:0016021;GO:0055085;GO:0055085;GO:0098655;	-	-	-	-	-	-
BGIBMGA008354	250.406	140.284	360.529	2.56999	1.36176	2.4906e-09	1.16261e-07	scaf2	4168131	4172842	-	453	-	GO:0005549;GO:0005549;	-	-	-	-	-	100286764
BGIBMGA004775	227.528	91.0572	364	3.99748	1.99909	3.51962e-09	1.59651e-07	scaf57	1599790	1601872	+	636	-	GO:0016787;GO:0016787;GO:0016818;GO:0016818;GO:0046872;GO:0046872;	K08077	EC:3.6.1.45	-	-	-	101741144
BGIBMGA003541	152.551	74.2496	230.853	3.10915	1.63652	3.63502e-09	1.64305e-07	scaf9	2551534	2553778	-	1503	-	-	-	-	-	-	-	-
BGIBMGA005167	903.43	465.844	1341.02	2.87868	1.52541	3.66118e-09	1.64907e-07	scaf32	4025020	4027739	+	792	-	GO:0004497;GO:0004499;GO:0004499;GO:0016491;GO:0050660;GO:0050660;GO:0050661;GO:0050661;GO:0055114;GO:0055114;GO:0055114;	-	-	-	-	-	-
BGIBMGA012406	411.887	255.044	568.73	2.22993	1.157	4.82395e-09	2.15018e-07	scaf190	34535	37978	+	789	-	GO:0005743;GO:0005743;GO:0005744;GO:0005744;GO:0015031;GO:0015031;	-	-	-	-	-	-
BGIBMGA011549	3420.86	1687.22	5154.49	3.05502	1.61118	5.81558e-09	2.53927e-07	scaf22	2392156	2396743	+	732	HJHBP	GO:0046872;GO:0046872;	-	-	-	-	Hemolymph juvenile hormone binding protein[Source:UniProtKB/TrEMBL;Acc:Q9U556]	-
BGIBMGA000222	390.785	242.191	539.38	2.22709	1.15516	7.11041e-09	3.0224e-07	scaf18	5526617	5556253	-	1701	-	GO:0016020;GO:0016021;GO:0016021;	-	-	-	-	-	-
BGIBMGA011289	170.295	87.576	253.014	2.88908	1.53061	7.16089e-09	3.03381e-07	scaf12	1242908	1248180	-	1512	-	GO:0000166;GO:0003774;GO:0003777;GO:0003777;GO:0005524;GO:0005524;GO:0005524;GO:0005874;GO:0005874;GO:0007018;GO:0007018;GO:0008017;GO:0008017;	-	-	-	-	-	-
BGIBMGA000273	43.5648	9.51075	77.6188	8.16117	3.02878	8.6117e-09	3.60092e-07	scaf18	3214718	3218072	-	354	-	GO:0042302;GO:0042302;GO:0042302;	-	-	-	-	-	-
BGIBMGA014238	278.997	163.389	394.605	2.41512	1.2721	8.81492e-09	3.67393e-07	scaf80	1040292	1054444	-	1902	-	GO:0016020;GO:0016020;GO:0016020;GO:0016021;GO:0016021;GO:0022857;GO:0022857;GO:0055085;GO:0055085;	-	-	-	-	-	-
BGIBMGA003129	1783.98	741.072	2826.89	3.81459	1.93153	1.06198e-08	4.31411e-07	scaf13	3212931	3222216	+	648	-	-	-	-	-	-	-	-
BGIBMGA008620	267.969	155.49	380.448	2.44677	1.29088	1.08142e-08	4.37376e-07	scaf136	105740	106123	-	384	-	GO:0005744;GO:0005744;GO:0030150;GO:0030150;	K17805	-	-	-	Mitochondria-associated granulocyte macrophage CSFsignaling molecule [Source:UniProtKB/TrEMBL;Acc:Q2F5Q0]	692951
BGIBMGA000316	321.287	193.958	448.615	2.31295	1.20973	1.19695e-08	4.75704e-07	scaf18	1123831	1126672	-	1395	-	GO:0003676;GO:0003676;GO:0005515;	-	-	-	-	-	101746404
BGIBMGA013110	220.601	123.874	317.328	2.56171	1.35711	1.55284e-08	6.0223e-07	scaf219	63911	70371	-	840	-	-	-	-	-	-	-	101743179
BGIBMGA002754	291.423	174.239	408.608	2.34511	1.22965	1.62575e-08	6.28608e-07	scaf146	159599	163921	-	1503	-	GO:0005524;GO:0005524;	-	-	-	-	-	-
BGIBMGA013453	599.272	396.983	801.562	2.01914	1.01374	1.84617e-08	7.00975e-07	scaf111	34350	40085	-	909	CDK2	GO:0000166;GO:0004672;GO:0004672;GO:0004674;GO:0004674;GO:0005524;GO:0005524;GO:0005524;GO:0006468;GO:0006468;GO:0016301;GO:0016310;	K02206	EC:2.7.11.22	-	-	Cyclin dependent kinase 2[Source:UniProtKB/TrEMBL;Acc:H6VMF4]	101738936
BGIBMGA012164	527.07	345.168	708.973	2.05399	1.03843	1.85114e-08	7.00975e-07	scaf75	581534	583836	-	375	-	-	-	-	-	-	-	-
BGIBMGA014566	159.688	67.3498	252.027	3.74206	1.90383	2.08339e-08	7.75202e-07	scaf479	6356	15974	-	1002	-	GO:0003824;GO:0003824;GO:0004559;GO:0004559;GO:0005975;GO:0005975;GO:0006013;GO:0006013;	-	-	-	-	-	-
BGIBMGA005199	430.123	244.84	615.407	2.51351	1.3297	2.21426e-08	8.19048e-07	scaf119	158686	179748	-	8541	-	GO:0005044;GO:0005044;GO:0006898;GO:0016020;GO:0016020;GO:0016020;GO:0016021;GO:0016021;	-	-	-	-	-	-
BGIBMGA001457	989.466	610.851	1368.08	2.23963	1.16326	2.24935e-08	8.27362e-07	scaf7	1991453	1997168	-	1911	-	-	-	-	-	-	-	-
BGIBMGA006359	472.483	278.44	666.526	2.39378	1.25929	2.28032e-08	8.33262e-07	scaf11	5879590	5884457	-	2433	-	GO:0005515;GO:0006364;GO:0006364;GO:0032040;GO:0032040;	-	-	-	-	-	-
BGIBMGA011439	560.229	371.697	748.762	2.01444	1.01038	2.46037e-08	8.87184e-07	scaf22	4399106	4402144	-	1062	-	GO:0016020;GO:0016020;GO:0016020;GO:0016021;GO:0016021;	-	-	-	-	-	-
BGIBMGA007423	465.868	301.072	630.665	2.09473	1.06676	2.48224e-08	8.90069e-07	scaf55	1773022	1776620	+	801	-	GO:0004014;GO:0004014;GO:0006597;GO:0006597;GO:0008295;GO:0008295;	-	-	-	-	-	-
BGIBMGA003528	339.044	208.987	469.1	2.24463	1.16648	2.52754e-08	9.03789e-07	scaf9	3335410	3336805	-	486	-	GO:0008418;GO:0016811;GO:0016811;GO:0070773;	-	-	-	-	-	-
BGIBMGA004637	631.6	421.006	842.194	2.00043	1.00031	2.55028e-08	9.09386e-07	scaf292	7504	10002	+	1209	-	-	K13205	-	-	-	-	101737610
BGIBMGA010572	286.374	171.638	401.111	2.33696	1.22464	2.57997e-08	9.1489e-07	scaf6	6813793	6815248	+	1083	-	GO:0000166;GO:0004672;GO:0004672;GO:0004674;GO:0004674;GO:0005524;GO:0005524;GO:0005524;GO:0006468;GO:0006468;	K08794	EC:2.7.11.17	-	-	-	101744568
BGIBMGA003777	775.909	473.422	1078.4	2.27788	1.18769	2.83937e-08	1.00411e-06	scaf91	27230	31947	+	1536	-	GO:0000079;GO:0000079;GO:0005634;GO:0005634;GO:0010389;GO:0010389;GO:0019901;GO:0019901;	K21771	-	-	-	-	100126204
BGIBMGA000812	189.177	103.814	274.539	2.64452	1.40301	2.86308e-08	1.00971e-06	scaf89	981916	983889	+	1974	-	GO:0005515;	-	-	-	-	-	-
BGIBMGA006062	50.7823	14.4597	87.1048	6.02395	2.59071	3.94522e-08	1.34336e-06	scaf5	825753	837569	-	1014	-	GO:0005890;GO:0005890;GO:0006813;GO:0006813;GO:0006814;GO:0006814;GO:0016020;GO:0016021;	-	-	-	-	-	-
BGIBMGA001137	480.139	315.436	644.842	2.04429	1.0316	4.60123e-08	1.55029e-06	scaf1	5506756	5509494	+	762	TYMS	GO:0004799;GO:0004799;GO:0006231;GO:0006231;GO:0032259;	-	-	-	-	Thymidylate synthase[Source:UniProtKB/TrEMBL;Acc:H9IV57]	-
BGIBMGA004781	120.959	58.6135	183.304	3.12733	1.64493	5.62816e-08	1.86689e-06	scaf46	2964067	2973567	-	558	-	GO:0004725;GO:0004725;GO:0006470;GO:0008138;GO:0008138;GO:0016311;GO:0016311;GO:0016787;GO:0016791;GO:0016791;GO:0035335;	-	-	-	-	-	-
BGIBMGA010479	70.0356	26.0504	114.021	4.37692	2.12992	5.85668e-08	1.92066e-06	scaf6	416867	417544	-	378	-	-	-	-	-	-	-	-
BGIBMGA003457	2291.16	1480.87	3101.45	2.09434	1.0665	6.08795e-08	1.97351e-06	scaf9	7135623	7136165	-	543	-	GO:0000166;GO:0003924;GO:0003924;GO:0005525;GO:0005525;GO:0005525;GO:0007165;GO:0007165;GO:0016020;GO:0016020;	K07839	-	-	-	Ras-related protein 2[Source:UniProtKB/TrEMBL;Acc:Q2F5M0]	693109
BGIBMGA011324	500.093	331.33	668.857	2.0187	1.01343	6.64732e-08	2.14401e-06	scaf12	1594228	1597386	+	906	-	GO:0003676;GO:0003676;GO:0003677;GO:0003677;	-	-	-	-	-	-
BGIBMGA013629	102.205	46.8458	157.563	3.36345	1.74994	7.0181e-08	2.25793e-06	scaf78	840780	850054	+	1575	-	GO:0016020;GO:0016021;GO:0016021;GO:0016021;GO:0055085;GO:0055085;	-	-	-	-	-	101739498
BGIBMGA007222	227.042	132.304	321.781	2.43214	1.28223	7.54147e-08	2.39037e-06	scaf175	155192	156168	+	630	RPA43_N	GO:0003899;GO:0003899;GO:0006351;GO:0006351;	K03004	-	-	-	RPA43_N protein[Source:UniProtKB/TrEMBL;Acc:D3JSV9]	100379192
BGIBMGA000081	276.597	163.394	389.8	2.38564	1.25438	8.65755e-08	2.68447e-06	scaf43	2010028	2010387	-	360	-	GO:0005634;GO:0005634;GO:0046982;GO:0046982;	K02326	EC:2.7.7.7	-	-	-	101741556
BGIBMGA011180	533.163	311.941	754.385	2.41836	1.27403	8.85894e-08	2.73844e-06	scaf12	6343250	6347182	-	2592	BMO.722	GO:0000139;GO:0000139;GO:0005198;GO:0005198;GO:0005737;GO:0005794;GO:0006886;GO:0006886;GO:0015031;GO:0016020;GO:0016192;GO:0016192;GO:0016192;GO:0030117;GO:0030117;GO:0030126;GO:0030126;GO:0030663;GO:0031410;	K17267	-	-	-	Coatomer subunit gamma[Source:UniProtKB/TrEMBL;Acc:H9JNS6]	692402
BGIBMGA010975	355.933	213.797	498.068	2.32963	1.2201	1.30542e-07	3.82736e-06	scaf83	577428	578953	-	777	-	-	K13122	-	-	-	-	101740319
BGIBMGA009732	143.684	76.0714	211.296	2.7776	1.47384	1.6963e-07	4.82535e-06	scaf27	551930	553655	+	1089	-	GO:0005634;GO:0005634;GO:0006338;GO:0006338;	-	-	-	-	-	-
BGIBMGA011410	296.341	187.168	405.514	2.16658	1.11542	1.69904e-07	4.82535e-06	scaf12	6325461	6338841	+	3129	-	-	-	-	-	-	-	-
BGIBMGA005441	141.708	50.064	233.353	4.66109	2.22067	1.9349e-07	5.447e-06	scaf19	1592336	1602679	+	2457	-	-	-	-	-	-	-	-
BGIBMGA008190	385.52	231.556	539.484	2.32981	1.22021	2.0642e-07	5.78561e-06	scaf52	2019145	2042851	+	1587	-	GO:0007275;GO:0007275;GO:0009966;GO:0009966;GO:0016020;GO:0016020;	-	-	-	-	-	-
BGIBMGA011391	102.373	48.8925	155.853	3.18766	1.6725	2.88802e-07	7.72365e-06	scaf12	4889887	4905400	+	1965	-	GO:0016020;GO:0016021;GO:0016021;GO:0016021;GO:0055085;GO:0055085;	-	-	-	-	-	-
BGIBMGA004343	363.987	237.338	490.635	2.06725	1.04771	2.90816e-07	7.76135e-06	scaf79	1349888	1350841	+	306	DRP	-	-	-	-	-	Death-related protein[Source:UniProtKB/TrEMBL;Acc:B8XWD7]	100216503
BGIBMGA006760	262.76	162.825	362.696	2.22752	1.15544	2.91837e-07	7.77243e-06	scaf10	5311048	5315930	+	720	-	-	-	-	-	-	-	-
BGIBMGA004889	318.772	180.89	456.653	2.52448	1.33599	2.99738e-07	7.94986e-06	scaf144	70340	75335	-	1026	-	GO:0006812;GO:0006812;GO:0008324;GO:0008324;GO:0016020;GO:0016021;GO:0016021;GO:0016021;GO:0055085;GO:0055085;GO:0098655;	K14692	-	-	-	-	101741721
BGIBMGA011380	365.3	236.032	494.568	2.09534	1.06719	3.22219e-07	8.3901e-06	scaf12	4221436	4240618	+	2070	-	GO:0003676;GO:0003676;GO:0003723;GO:0003723;GO:0006397;GO:0006397;GO:0046872;GO:0046872;GO:0046872;	-	-	-	-	-	-
BGIBMGA009609	247.706	152.229	343.183	2.25439	1.17274	3.36191e-07	8.70097e-06	scaf103	405394	406830	+	1437	-	GO:0004583;GO:0004583;GO:0004583;GO:0005789;GO:0005789;GO:0005789;GO:0006488;GO:0006488;GO:0006488;GO:0016020;GO:0016021;GO:0016021;GO:0016757;GO:0106073;GO:0106073;	K03850	EC:2.4.1.256	-	-	-	101745380
BGIBMGA004952	4887.76	2693.42	7082.09	2.6294	1.39474	3.7212e-07	9.53475e-06	scaf65	199919	214806	-	2247	-	GO:0004888;GO:0004888;GO:0007166;GO:0007166;GO:0016020;GO:0016021;GO:0016021;GO:0016021;	-	-	-	-	-	-
BGIBMGA008227	56.9631	20.3651	93.5611	4.59419	2.19981	4.0409e-07	1.02719e-05	scaf121	10588	13484	+	429	-	GO:0007155;GO:0007155;GO:0016020;GO:0016021;GO:0016021;GO:0016021;GO:0042246;GO:0042246;	-	-	-	-	-	-
BGIBMGA000404	307.294	196.732	417.856	2.12399	1.08678	4.09791e-07	1.03962e-05	scaf18	2225404	2238603	+	1413	-	-	-	-	-	-	-	-
BGIBMGA005855	408.743	244.467	573.02	2.34395	1.22894	4.39338e-07	1.11019e-05	scaf125	24203	24825	+	198	-	-	-	-	-	-	-	-
BGIBMGA009012	696.816	334.941	1058.69	3.16083	1.6603	4.55111e-07	1.14554e-05	scaf17	4058313	4059663	+	327	-	GO:0005739;GO:0005739;GO:0009055;GO:0009055;GO:0020037;GO:0020037;GO:0022900;GO:0046872;GO:0046872;GO:0055114;GO:0070469;GO:0070469;	-	-	-	-	-	-
BGIBMGA000582	286.888	182.583	391.193	2.14255	1.09933	4.76487e-07	1.19466e-05	scaf8	1329639	1333212	-	1647	-	GO:0016020;GO:0016021;GO:0016021;	-	-	-	-	-	101744139
BGIBMGA003014	30.0099	5.90535	54.1145	9.16364	3.19592	4.8147e-07	1.2048e-05	scaf13	4022228	4023110	-	468	-	GO:0020037;GO:0020037;GO:0020037;GO:0046872;GO:0046872;	-	-	-	-	-	101746637
BGIBMGA013390	235.184	144.244	326.125	2.26093	1.17692	4.84227e-07	1.2083e-05	scaf50	1408911	1409453	-	543	-	-	-	-	-	-	-	-
BGIBMGA007760	264.761	166.861	362.661	2.17344	1.11998	6.01168e-07	1.45333e-05	scaf3	329993	334534	-	1662	-	GO:0003676;GO:0003676;GO:0005634;GO:0005634;GO:0008270;GO:0008270;GO:0016020;GO:0016021;GO:0016021;	-	-	-	-	-	-
BGIBMGA013605	1132.55	741.659	1523.44	2.0541	1.03851	7.10728e-07	1.67713e-05	scaf78	99520	102832	-	963	-	GO:0003723;GO:0003723;GO:0003723;GO:0003743;GO:0003743;GO:0003743;GO:0005737;GO:0005737;GO:0006412;GO:0006413;GO:0006413;GO:0006413;	-	-	-	-	-	-
BGIBMGA011673	155.343	87.2318	223.455	2.56162	1.35706	7.14348e-07	1.68258e-05	scaf16	1928696	1933970	-	2106	-	GO:0004672;GO:0004672;GO:0005524;GO:0005524;GO:0006468;GO:0006468;	-	-	-	-	-	-
BGIBMGA013227	224.663	105.98	343.346	3.23971	1.69587	7.16577e-07	1.68474e-05	scaf39	1256977	1269360	+	1866	-	GO:0005634;GO:0005634;GO:0006508;GO:0006508;GO:0008233;GO:0008233;	-	-	-	-	-	-
BGIBMGA006308	168.386	96.9577	239.814	2.47338	1.30649	7.37198e-07	1.72375e-05	scaf49	1139807	1172552	+	3645	-	GO:0005515;	-	-	-	-	-	-
BGIBMGA008284	1176.73	713.691	1639.77	2.2976	1.20012	7.49731e-07	1.74543e-05	scaf94	1451220	1452346	+	1071	-	GO:0003676;GO:0003676;GO:0003723;GO:0003723;	-	-	-	-	-	-
BGIBMGA003635	467.807	287.569	648.045	2.25353	1.17219	8.9315e-07	2.00795e-05	scaf9	1946169	1955107	+	2409	-	GO:0005515;GO:0005634;GO:0005634;GO:0006606;GO:0006886;GO:0006886;GO:0008536;GO:0008536;	-	-	-	-	-	-
BGIBMGA000788	461.423	264.526	658.32	2.48867	1.31538	9.92399e-07	2.21555e-05	scaf89	332062	341922	+	642	-	GO:0005375;GO:0005375;GO:0016020;GO:0016021;GO:0016021;GO:0016021;GO:0035434;GO:0035434;	-	-	-	-	-	-
BGIBMGA013971	160.913	92.3959	229.43	2.48312	1.31215	9.99265e-07	2.22701e-05	scaf29	1659544	1661829	+	1263	-	-	-	-	-	-	-	101744771
BGIBMGA011997	293.462	191.08	395.845	2.07162	1.05076	1.01231e-06	2.24053e-05	scaf59	2168703	2173280	+	3381	-	GO:0003676;GO:0003676;	-	-	-	-	-	-
BGIBMGA004001	141.687	78.6344	204.741	2.6037	1.38056	1.03525e-06	2.28736e-05	scaf36	2925047	2926417	-	1371	HMG-S_BM	GO:0003824;GO:0003824;GO:0004421;GO:0004421;GO:0004421;GO:0006629;GO:0006694;GO:0008202;GO:0008299;GO:0008299;GO:0016126;GO:0016126;GO:0016740;GO:0016746;	K01641	EC:2.3.3.10	-	-	3-hydroxy-3-methylglutaryl-CoA synthase[Source:UniProtKB/TrEMBL;Acc:A5A798]	100101203
BGIBMGA006554	100.197	47.898	152.495	3.18376	1.67073	1.03805e-06	2.28959e-05	scaf10	6661445	6663828	-	273	-	GO:0016020;GO:0016021;GO:0016021;	-	-	-	-	-	-
BGIBMGA002216	95.806	46.6786	144.933	3.10492	1.63456	1.06795e-06	2.3315e-05	scaf122	124177	135141	-	897	-	-	-	-	-	-	-	-
BGIBMGA010747	189.132	113.492	264.771	2.33294	1.22215	1.08903e-06	2.36948e-05	scaf25	1910624	1928759	-	1677	-	GO:0000166;GO:0004672;GO:0004672;GO:0004674;GO:0004674;GO:0004674;GO:0004703;GO:0004703;GO:0005524;GO:0005524;GO:0005524;GO:0006468;GO:0006468;GO:0007165;GO:0007165;GO:0016301;GO:0016310;GO:0016740;	-	-	-	-	-	-
BGIBMGA003656	376.617	208.38	544.854	2.61471	1.38665	1.19554e-06	2.57071e-05	scaf9	2976092	2984767	+	1068	-	GO:0003824;GO:0003824;GO:0030170;GO:0030170;	-	-	-	-	-	-
BGIBMGA001690	109.72	56.3184	163.122	2.89642	1.53427	1.28216e-06	2.74319e-05	scaf35	652182	656505	-	1407	-	GO:0003676;GO:0003676;GO:0005634;GO:0005634;GO:0008270;GO:0008270;	-	-	-	-	-	101742376
BGIBMGA012094	336.178	223.652	448.705	2.00626	1.00451	1.32384e-06	2.82295e-05	scaf24	1990666	1998412	+	1494	-	GO:0000166;GO:0004672;GO:0004672;GO:0004713;GO:0004713;GO:0004713;GO:0004715;GO:0004715;GO:0005515;GO:0005524;GO:0005524;GO:0005524;GO:0006468;GO:0006468;GO:0016301;GO:0016310;GO:0016740;GO:0018108;	-	-	-	-	-	-
BGIBMGA003191	145.281	81.8046	208.757	2.5519	1.35157	1.35041e-06	2.87007e-05	scaf13	5422785	5424009	+	894	-	-	K14765	-	-	-	-	101742074
BGIBMGA013507	70.7809	30.5261	111.036	3.6374	1.86291	1.43617e-06	3.04042e-05	scaf101	89629	107742	+	1461	BMCYCE	GO:0005634;GO:0005634;	-	-	-	-	Cyclin E [Source:UniProtKB/TrEMBL;Acc:B6ZL90]"	-
BGIBMGA001025	187.103	112.03	262.177	2.34025	1.22666	1.46266e-06	3.08818e-05	scaf1	4699031	4700302	-	525	-	GO:0005515;	-	-	-	-	-	-
BGIBMGA000963	125.116	67.8661	182.367	2.68716	1.42608	1.52814e-06	3.21586e-05	scaf1	8175091	8185940	-	2040	-	GO:0016020;GO:0016021;GO:0016021;	-	-	-	-	-	-
BGIBMGA002376	246.702	156.92	336.484	2.14431	1.10051	1.61786e-06	3.38249e-05	scaf14	5674545	5677093	-	1047	-	GO:0003860;GO:0003860;GO:0003860;GO:0005739;GO:0005739;GO:0006574;GO:0006574;GO:0009083;GO:0016787;	-	-	-	-	-	-
BGIBMGA009675	598.367	383.752	812.982	2.11851	1.08305	1.662e-06	3.46349e-05	scaf27	1875742	1886365	-	1614	-	GO:0003824;GO:0003824;GO:0008152;	-	-	-	-	-	101735849
BGIBMGA001398	117.933	62.5729	173.292	2.76945	1.4696	1.71257e-06	3.56309e-05	scaf7	6986851	7001451	-	1308	-	GO:0042981;GO:0042981;	-	-	-	-	-	-
BGIBMGA013075	119.319	64.2607	174.378	2.71361	1.44021	1.87239e-06	3.85013e-05	scaf4	7813373	7822152	+	1233	-	GO:0000166;GO:0004496;GO:0004496;GO:0004496;GO:0005524;GO:0005524;GO:0005524;GO:0005737;GO:0005737;GO:0005737;GO:0006629;GO:0006694;GO:0008202;GO:0008299;GO:0008299;GO:0016126;GO:0016126;GO:0016301;GO:0016310;GO:0016740;GO:0019287;GO:0019287;	-	-	-	-	-	-
BGIBMGA006498	73.1912	32.7831	113.599	3.46519	1.79293	1.96649e-06	4.01333e-05	scaf11	4188824	4189197	+	300	-	-	-	-	-	-	-	-
BGIBMGA007824	1183.92	699.299	1668.54	2.38602	1.2546	2.26827e-06	4.54255e-05	scaf3	2369953	2372909	+	1266	-	GO:0000166;GO:0000287;GO:0000287;GO:0003824;GO:0003824;GO:0004775;GO:0004775;GO:0004776;GO:0004776;GO:0004776;GO:0005524;GO:0005524;GO:0005525;GO:0005525;GO:0005739;GO:0005739;GO:0006099;GO:0006099;GO:0006099;GO:0006104;GO:0006104;GO:0016874;GO:0046872;	K01900	-	-	-	-	101740061
BGIBMGA003618	296.09	196.033	396.147	2.02081	1.01494	2.27945e-06	4.55784e-05	scaf9	823879	828466	+	1533	-	GO:0003904;GO:0003904;GO:0006281;GO:0006281;	-	-	-	-	-	-
BGIBMGA012668	215.683	134.91	296.457	2.19745	1.13583	2.33957e-06	4.67078e-05	scaf69	1776679	1787495	-	1857	-	GO:0005042;GO:0005042;GO:0005515;GO:0007165;GO:0007165;GO:0016020;GO:0016021;GO:0016021;GO:0016021;GO:0038007;GO:0038007;	-	-	-	-	-	-
BGIBMGA006075	265.748	172.976	358.52	2.07266	1.05148	2.37975e-06	4.73625e-05	scaf5	427312	431617	-	885	-	GO:0016020;GO:0016021;GO:0016021;GO:0022857;GO:0022857;GO:0055085;GO:0055085;	K15106	-	-	-	-	101743508
BGIBMGA010006	199.353	122.535	276.171	2.25382	1.17237	2.42555e-06	4.79027e-05	scaf45	2954662	2962777	-	1773	-	GO:0004672;GO:0004672;GO:0005524;GO:0005524;GO:0006468;GO:0006468;	-	-	-	-	-	-
BGIBMGA008546	124.982	68.9945	180.968	2.62294	1.39118	2.62358e-06	5.10644e-05	scaf2	9602763	9603305	+	543	-	-	-	-	-	-	-	101745870
BGIBMGA000032	101.275	51.9336	150.616	2.90016	1.53613	2.62542e-06	5.10644e-05	scaf98	74347	87090	+	1971	-	GO:0004445;GO:0016787;GO:0016787;GO:0046856;GO:0046856;	-	-	-	-	-	-
BGIBMGA002238	38.0153	11.2895	64.741	5.73462	2.5197	2.76725e-06	5.35794e-05	scaf34	3939186	3940091	-	906	-	GO:0003676;GO:0003676;	K12379	-	-	-	-	101735539
BGIBMGA013376	347.34	231.169	463.512	2.00507	1.00366	2.82929e-06	5.44522e-05	scaf50	2755395	2774973	-	14184	-	GO:0005509;GO:0005509;	-	-	-	-	-	-
BGIBMGA009361	151.982	89.1777	214.787	2.40853	1.26815	2.92574e-06	5.60323e-05	scaf53	376131	381877	+	609	-	GO:0003924;GO:0003924;GO:0005525;GO:0005525;	K07917	-	-	-	-	101737287
BGIBMGA010190	306.768	196.091	417.445	2.12883	1.09006	2.92885e-06	5.60323e-05	scaf15	198015	201394	+	255	-	GO:0016020;GO:0016021;GO:0016021;	-	-	-	-	-	-
BGIBMGA006371	51.5056	19.4518	83.5594	4.29572	2.1029	2.96553e-06	5.65653e-05	scaf11	4632058	4640503	-	2262	-	GO:0016020;GO:0016021;GO:0016021;	-	-	-	-	-	-
BGIBMGA013017	218.412	137.774	299.05	2.17059	1.11809	3.11404e-06	5.91345e-05	scaf4	4961717	4970742	+	951	-	-	-	-	-	-	-	-
BGIBMGA001204	31.911	8.07622	55.7459	6.90247	2.78711	3.14304e-06	5.94216e-05	scaf1	9062203	9066151	+	705	-	GO:0046872;GO:0046872;	-	-	-	-	-	-
BGIBMGA011212	336.388	145.367	527.41	3.62812	1.85922	3.40677e-06	6.40302e-05	scaf12	4606124	4606501	-	306	-	-	-	-	-	-	-	-
BGIBMGA012672	228.371	145.845	310.897	2.13169	1.092	3.46306e-06	6.48983e-05	scaf69	1390933	1392578	-	879	-	GO:0003676;GO:0003676;GO:0005634;GO:0005643;GO:0005643;GO:0006913;GO:0006913;GO:0015031;GO:0015031;GO:0031965;GO:0031965;GO:0051028;GO:0051028;	K14313	-	-	-	-	101742780
BGIBMGA013463	363.509	237.295	489.723	2.06378	1.04529	3.4986e-06	6.52785e-05	scaf111	147261	151658	+	654	-	-	K06685	-	-	-	-	101739784
BGIBMGA009776	36.6183	10.8113	62.4253	5.77407	2.52959	3.64537e-06	6.76236e-05	scaf27	3408530	3410422	+	501	-	GO:0016020;GO:0016021;GO:0016021;	-	-	-	-	-	-
BGIBMGA012269	41.3289	13.6325	69.0253	5.0633	2.34008	3.92469e-06	7.23868e-05	scaf26	1585166	1588778	-	1923	-	GO:0005085;GO:0005085;GO:0005085;GO:0005622;GO:0005622;GO:0007264;GO:0007264;	-	-	-	-	-	-
BGIBMGA007124	32.1634	8.51137	55.8154	6.55774	2.7132	4.3326e-06	7.90023e-05	scaf21	4659442	4662741	+	630	-	-	-	-	-	-	-	-
BGIBMGA006241	268.08	163.958	372.201	2.2701	1.18275	4.51829e-06	8.1692e-05	scaf88	356648	361279	-	579	-	GO:0016020;GO:0016021;GO:0016021;GO:0022857;	-	-	-	-	-	-
BGIBMGA011596	80.6898	39.5489	121.831	3.08051	1.62317	4.56269e-06	8.22989e-05	scaf197	19832	26051	-	744	-	-	-	-	-	-	-	-
BGIBMGA006690	165.515	99.8649	231.166	2.31478	1.21088	4.56468e-06	8.22989e-05	scaf10	2199404	2205843	+	993	-	-	-	-	-	-	-	-
BGIBMGA001386	3216.48	2044.11	4388.85	2.14708	1.10237	4.63129e-06	8.32659e-05	scaf7	8282876	8284130	-	1098	-	GO:0000287;GO:0000287;GO:0004749;GO:0004749;GO:0009116;GO:0009116;GO:0009156;GO:0009156;GO:0009165;GO:0009165;GO:0044249;GO:0044249;	-	-	-	-	-	-
BGIBMGA013486	213.7	135.99	291.409	2.14287	1.09954	4.94518e-06	8.82911e-05	scaf101	822716	824372	-	549	-	GO:0000166;GO:0005524;GO:0005524;GO:0016740;GO:0016740;	K10687	EC:2.3.2.23	-	-	-	101743026
BGIBMGA001167	2505.65	1635.78	3375.52	2.06355	1.04513	5.07534e-06	9.03636e-05	scaf1	7368907	7370679	+	1431	-	GO:0000122;GO:0000122;GO:0001709;GO:0001709;GO:0003677;GO:0003700;GO:0003700;GO:0005634;GO:0005634;GO:0005634;GO:0006355;GO:0006355;GO:0043565;GO:0043565;GO:0045596;GO:0045596;GO:0045892;GO:0045892;	-	-	-	-	-	-
BGIBMGA004668	129.992	74.2496	185.734	2.50148	1.32278	5.74948e-06	0.000100966	scaf135	368034	369738	+	420	-	-	-	-	-	-	-	-
BGIBMGA012976	261.888	173.249	350.527	2.02325	1.01668	5.92389e-06	0.000103322	scaf4	3266921	3283409	+	2934	-	GO:0004672;GO:0004672;GO:0005524;GO:0005524;GO:0006468;GO:0006468;	-	-	-	-	-	-
BGIBMGA012859	252.511	165.909	339.112	2.04396	1.03137	6.08713e-06	0.000105595	scaf4	3291906	3294773	-	474	-	-	-	-	-	-	-	-
BGIBMGA000863	187.75	118.221	257.278	2.17624	1.12184	6.22092e-06	0.000107336	scaf1	13372307	13374088	-	1554	-	-	-	-	-	-	-	-
BGIBMGA011574	124.52	70.9024	178.137	2.51243	1.32908	6.72678e-06	0.000114222	scaf22	3622377	3634730	+	1746	-	GO:0004867;GO:0005515;	-	-	-	-	-	-
BGIBMGA007932	67.1998	30.311	104.088	3.43402	1.7799	6.84064e-06	0.000116002	scaf3	7785478	7799225	+	2592	-	GO:0005089;GO:0005089;GO:0005515;GO:0035023;GO:0035023;	-	-	-	-	-	-
BGIBMGA010758	246.533	161.874	331.193	2.046	1.0328	6.97402e-06	0.000118108	scaf25	900442	906485	-	3402	-	-	-	-	-	-	-	-
BGIBMGA012333	201.273	128.469	274.078	2.13343	1.09317	7.18572e-06	0.000121213	scaf26	2209629	2218250	+	918	-	-	-	-	-	-	-	-
BGIBMGA013037	211.226	136.076	286.376	2.10452	1.07349	8.33335e-06	0.000138211	scaf4	5864634	5870610	+	708	-	-	-	-	-	-	-	-
BGIBMGA000462	444.392	265.741	623.043	2.34455	1.22931	8.47666e-06	0.000140225	scaf18	4855528	4864623	+	684	-	GO:0005576;GO:0005576;	-	-	-	-	27 kDa glycoprotein [Source:UniProtKB/Swiss-Prot;Acc:Q8T113]	692422
BGIBMGA012390	47.556	16.2385	78.8735	4.85719	2.28012	9.25981e-06	0.000151232	scaf82	940674	941462	+	789	-	GO:0016020;GO:0016020;GO:0016757;GO:0016757;	-	-	-	-	-	-
BGIBMGA002934	16.2431	1.56361	30.9226	19.7764	4.30571	1.02319e-05	0.000165216	scaf30	4007443	4007766	+	324	-	-	-	-	-	-	-	101742431
BGIBMGA000671	115.438	65.7813	165.096	2.50977	1.32755	1.21106e-05	0.000190755	scaf8	3749018	3756326	+	852	-	GO:0016020;GO:0016021;GO:0016021;	-	-	-	-	-	-
BGIBMGA010955	244.693	163.126	326.259	2.00004	1.00003	1.24408e-05	0.000195474	scaf83	1521374	1523179	-	774	-	-	-	-	-	-	-	-
BGIBMGA001847	100.471	55.056	145.886	2.64977	1.40587	1.31854e-05	0.000205165	scaf28	4019052	4034418	-	1815	-	GO:0009966;GO:0009966;GO:0016020;GO:0016020;GO:0016020;GO:0016021;GO:0016021;	-	-	-	-	-	-
BGIBMGA006973	124.995	72.8151	177.175	2.43322	1.28287	1.39518e-05	0.000215781	scaf21	5309631	5313247	-	858	-	GO:0000166;GO:0005524;GO:0005524;GO:0005524;GO:0005737;GO:0005737;GO:0016226;GO:0016226;GO:0016226;GO:0046872;GO:0046872;GO:0051536;GO:0051539;GO:0051539;GO:0051539;	-	-	-	-	-	-
BGIBMGA007838	83.5259	24.8408	142.211	5.72489	2.51725	1.95231e-05	0.000288066	scaf3	3068619	3075477	+	621	-	GO:0003841;GO:0003841;GO:0003841;GO:0006629;GO:0008654;GO:0008654;GO:0008654;GO:0016020;GO:0016020;GO:0016020;GO:0016021;GO:0016021;GO:0016740;GO:0016746;GO:0016746;GO:0016746;	-	-	-	-	-	-
BGIBMGA011288	124.335	70.9933	177.676	2.50271	1.32349	1.99795e-05	0.000294125	scaf12	1264893	1265712	-	387	-	-	-	-	-	-	-	-
BGIBMGA011213	2117.93	1130.5	3105.36	2.7469	1.4578	2.11364e-05	0.000309381	scaf12	4535703	4547239	-	1455	-	GO:0016020;GO:0016020;GO:0016020;GO:0016021;GO:0016021;	-	-	-	-	-	-
BGIBMGA007931	129.114	76.5114	181.717	2.37503	1.24795	2.1559e-05	0.000314135	scaf3	7758415	7761595	+	2649	-	-	-	-	-	-	-	-
BGIBMGA011536	795.786	504.958	1086.61	2.15189	1.1056	2.20705e-05	0.000320496	scaf22	1441390	1448502	+	1302	-	-	-	-	-	-	-	-
BGIBMGA011029	1632.13	1068.2	2196.07	2.05586	1.03974	2.41993e-05	0.000349827	scaf31	2470870	2472657	-	1218	-	GO:0003824;GO:0003824;GO:0008152;GO:0016740;GO:0016746;GO:0016747;GO:0016747;	-	-	-	-	-	-
BGIBMGA004486	51.7589	20.1021	83.4157	4.14961	2.05298	2.43356e-05	0.000350613	scaf37	2733224	2740500	+	1197	-	GO:0016020;GO:0016021;GO:0016021;GO:0016021;GO:0022857;GO:0022857;GO:0055085;GO:0055085;	-	-	-	-	-	-
BGIBMGA006803	31.4154	6.86171	55.969	8.15672	3.02799	2.61595e-05	0.000372916	scaf70	1809328	1810428	-	333	-	-	-	-	-	-	-	-
BGIBMGA011656	186.449	120.837	252.062	2.08596	1.06071	2.77401e-05	0.000393045	scaf16	2621032	2621430	-	399	-	GO:0016020;GO:0016021;GO:0016021;	-	-	-	-	-	101746264
BGIBMGA009947	92.3726	50.8003	133.945	2.63669	1.39873	3.29705e-05	0.000455589	scaf267	27452	28427	-	663	-	-	-	-	-	-	-	-
BGIBMGA009579	70.247	35.2551	105.239	2.98507	1.57776	3.36447e-05	0.000463907	scaf103	769124	776043	-	708	-	GO:0016311;GO:0016791;GO:0016791;	K13248	EC:3.1.3.74	-	-	-	101745817
BGIBMGA008134	195.277	128.698	261.855	2.03464	1.02478	3.41917e-05	0.000470943	scaf52	1719696	1719995	-	300	-	-	-	-	-	-	-	-
BGIBMGA007919	209.822	139.601	280.044	2.00604	1.00435	3.60364e-05	0.000491848	scaf3	6469203	6473984	+	759	-	GO:0016491;GO:0016491;GO:0055114;	-	-	-	-	-	-
BGIBMGA000727	46.2062	19.2366	73.1758	3.80398	1.92751	4.84537e-05	0.000639918	scaf8	6688125	6693403	+	1116	-	-	-	-	-	-	-	-
BGIBMGA005389	139.381	88.0493	190.712	2.16597	1.11502	6.21075e-05	0.000793308	scaf19	533576	542192	-	1548	-	GO:0016020;GO:0016021;GO:0016021;GO:0016021;GO:0055085;GO:0055085;	K12301	-	-	-	-	101741883
BGIBMGA013831	72.0414	16.6736	127.409	7.64135	2.93383	6.74875e-05	0.000852693	scaf62	923862	928783	-	1737	-	GO:0008152;GO:0016020;GO:0016021;GO:0016021;GO:0016740;GO:0016757;GO:0016758;GO:0016758;	-	-	-	-	-	-
BGIBMGA010649	23.0892	5.94838	40.2301	6.7632	2.75771	7.57454e-05	0.000940371	scaf84	153626	156143	+	1674	-	-	-	-	-	-	-	-
BGIBMGA014123	171.796	107.855	235.737	2.18569	1.12809	7.70364e-05	0.000950589	scaf76	234745	235752	+	1008	-	GO:0016020;GO:0016021;GO:0016021;GO:0055085;GO:0055085;	K15278	-	-	-	-	101745518
BGIBMGA000321	1197.29	774.313	1620.26	2.09251	1.06524	7.7132e-05	0.000950589	scaf18	790833	801784	-	1071	-	-	-	-	-	-	-	-
BGIBMGA008509	31.5553	10.5532	52.5574	4.98025	2.31622	7.97842e-05	0.000975418	scaf2	6641153	6641917	+	765	-	GO:0016491;GO:0016491;GO:0055114;	-	-	-	-	-	101735610
BGIBMGA007617	293.426	165.039	421.813	2.55584	1.3538	8.12386e-05	0.00099037	scaf3	9056173	9070959	-	1980	-	GO:0016020;GO:0016021;GO:0016021;GO:0016747;GO:0016747;	-	-	-	-	-	-
BGIBMGA009057	170.763	113.057	228.468	2.02082	1.01494	8.35765e-05	0.00101502	scaf63	1421555	1426711	-	801	-	GO:0016020;GO:0016021;GO:0016021;GO:0022857;	K15104	-	-	-	-	101740913
BGIBMGA012984	145.587	93.5244	197.65	2.11335	1.07953	8.50573e-05	0.00102957	scaf4	3539422	3542650	+	417	-	GO:0016787;GO:0016787;	-	-	-	-	-	-
BGIBMGA011813	128.804	81.0585	176.55	2.17806	1.12304	8.64501e-05	0.00104301	scaf16	2338958	2344877	+	1071	-	GO:0003824;GO:0003824;GO:0009058;GO:0009058;	-	-	-	-	-	-
BGIBMGA007093	16730	6343.78	27116.1	4.27445	2.09574	8.8816e-05	0.00106455	scaf21	3069304	3083971	+	951	-	GO:0005739;GO:0005743;GO:0005743;GO:0005743;GO:0015187;GO:0015187;GO:0015187;GO:0016020;GO:0016021;GO:0016021;GO:0022857;GO:1904983;GO:1904983;GO:1904983;	K15118	-	-	-	-	101745781
BGIBMGA009048	331.32	213.673	448.967	2.10119	1.0712	9.55314e-05	0.00112818	scaf63	1769537	1770433	-	897	-	GO:0016020;GO:0016021;GO:0016021;GO:0022857;	K15109	-	-	-	-	101742633
BGIBMGA003079	407.172	252.591	561.753	2.22396	1.15313	9.73504e-05	0.00114755	scaf13	116074	116814	+	741	-	GO:0003677;GO:0003677;GO:0005634;GO:0005634;	K09267	-	-	-	-	101737080
BGIBMGA014590	49.3336	22.536	76.1312	3.37821	1.75626	0.000100662	0.00118009	BABH01043539	2250	3138	-	567	-	-	-	-	-	-	-	-
BGIBMGA007505	137.365	86.5766	188.154	2.17326	1.11986	0.000101725	0.00119038	scaf66	1363848	1367997	-	372	-	GO:0000166;GO:0003924;GO:0003924;GO:0005525;GO:0005525;GO:0005525;GO:0005622;GO:0005622;GO:0007264;GO:0007264;	-	-	-	-	-	-
BGIBMGA009155	102.115	60.6601	143.57	2.36679	1.24293	0.000104398	0.00121391	scaf96	1000760	1001269	+	510	-	-	K03871	-	-	-	-	101739221
BGIBMGA011082	636.726	421.183	852.269	2.02351	1.01686	0.000107403	0.00124188	scaf31	2569541	2573107	+	3567	-	GO:0002376;GO:0005515;GO:0007165;GO:0007165;GO:0016020;GO:0016021;GO:0016021;GO:0045087;GO:0045087;	-	-	-	-	-	-
BGIBMGA004034	76.9534	12.2459	141.661	11.5681	3.53208	0.000111678	0.00128575	scaf36	820725	841519	-	849	-	GO:0004930;GO:0004930;GO:0007186;GO:0007186;GO:0008528;GO:0008528;GO:0016020;GO:0016021;GO:0016021;GO:0016021;	-	-	-	-	-	-
BGIBMGA013382	105.52	63.2662	147.775	2.33576	1.22389	0.000116472	0.00133376	scaf50	2130613	2140797	-	1743	-	GO:0005267;GO:0005267;GO:0006811;GO:0016020;GO:0016020;GO:0016020;GO:0016021;GO:0016021;GO:0071805;GO:0071805;	K04919	-	-	-	-	101741853
BGIBMGA000977	159.401	105.502	213.299	2.02175	1.0156	0.000117379	0.00134296	scaf1	7380459	7380824	-	366	-	GO:0003677;GO:0003697;GO:0003697;GO:0006260;GO:0006260;	-	-	-	-	Single-stranded DNA-binding protein[Source:UniProtKB/TrEMBL;Acc:H9IUP7]	-
BGIBMGA007636	196.468	119.14	273.795	2.29811	1.20044	0.00011779	0.00134619	scaf3	8268906	8277509	-	1623	-	GO:0005089;GO:0005089;GO:0005515;GO:0005622;GO:0005622;GO:0035023;GO:0035023;GO:0035556;GO:0035556;GO:0046872;GO:0046872;	-	-	-	-	-	-
BGIBMGA005729	103.364	61.8747	144.854	2.34109	1.22718	0.000124164	0.00140431	scaf123	345888	346721	-	834	-	-	-	-	-	-	-	-
BGIBMGA004517	154.654	102.074	207.235	2.03024	1.02165	0.000137313	0.00152746	scaf97	597911	607893	-	1644	-	-	-	-	-	-	-	101744030
BGIBMGA005699	149.882	93.7493	206.015	2.19751	1.13587	0.000138618	0.00153665	scaf143	66557	67057	-	501	-	GO:0006281;GO:0006281;GO:0008413;GO:0008413;GO:0016787;GO:0016787;	K17816	-	-	-	-	101739539
BGIBMGA011287	134.094	80.8962	187.291	2.3152	1.21114	0.000143613	0.00157953	scaf12	1269162	1271582	-	489	-	-	-	-	-	-	-	-
BGIBMGA011151	128.683	81.9718	175.395	2.1397	1.09741	0.000145725	0.00159342	scaf95	1004976	1013166	+	1917	-	GO:0005515;	K21435	-	-	-	-	101736183
BGIBMGA005869	109.857	67.1297	152.585	2.27298	1.18459	0.000146887	0.00160339	scaf125	444667	445014	+	348	-	GO:0000811;GO:0000811;GO:0006260;GO:0006260;	-	-	-	-	-	-
BGIBMGA005897	10850.4	4257.49	17443.3	4.09708	2.0346	0.000151181	0.00164606	scaf67	1375584	1378281	+	864	-	GO:0003824;GO:0003824;GO:0006596;GO:0006596;GO:0016740;GO:0016740;	K00797	EC:2.5.1.16	-	-	-	101742094
BGIBMGA011367	118.761	74.7229	162.8	2.17871	1.12348	0.000163904	0.00175775	scaf12	3511134	3514577	+	1704	-	-	-	-	-	-	-	-
BGIBMGA008440	21.8413	5.9914	37.6913	6.29089	2.65326	0.000171733	0.00182503	scaf2	1679752	1690553	+	3327	-	GO:0005506;GO:0005506;GO:0009055;GO:0009055;GO:0016491;GO:0016491;GO:0016614;GO:0022900;GO:0046872;GO:0046872;GO:0046872;GO:0050660;GO:0050660;GO:0051536;GO:0051536;GO:0051536;GO:0051537;GO:0051537;GO:0051537;GO:0055114;GO:0055114;GO:0071949;GO:0071949;	-	-	-	-	-	-
BGIBMGA012771	149.113	98.7315	199.494	2.02057	1.01476	0.000182946	0.00192973	scaf4	8224637	8230887	-	747	-	-	-	-	-	-	-	-
BGIBMGA000178	114.059	59.9668	168.15	2.80405	1.48751	0.000193682	0.00203129	scaf154	1225	9773	+	858	-	GO:0016020;GO:0016021;GO:0016021;GO:0016021;GO:0055085;GO:0055085;	-	-	-	-	-	-
BGIBMGA012667	70.5842	38.6024	102.566	2.65699	1.40979	0.000205525	0.0021363	scaf69	1834638	1836670	-	651	-	GO:0005042;GO:0005042;GO:0016021;GO:0016021;GO:0038007;GO:0038007;	-	-	-	-	-	-
BGIBMGA014594	147.003	97.1298	196.876	2.02694	1.0193	0.000210251	0.00218027	scaf560	2756	6549	+	486	-	-	-	-	-	-	-	-
BGIBMGA000563	178.799	38.9896	318.608	8.17162	3.03062	0.000211599	0.00219057	scaf8	3197782	3205069	-	1686	TH	GO:0004497;GO:0004497;GO:0004511;GO:0004511;GO:0004511;GO:0005506;GO:0005506;GO:0009072;GO:0009072;GO:0016491;GO:0016714;GO:0016714;GO:0042423;GO:0042423;GO:0046872;GO:0055114;GO:0055114;GO:0055114;	K00501	EC:1.14.16.2	-	-	Tyrosine hydroxylase[Source:UniProtKB/TrEMBL;Acc:B7XAK2]	100270767
BGIBMGA004494	153.261	101.95	204.572	2.0066	1.00475	0.000213865	0.00220913	scaf37	3147484	3148131	+	648	-	GO:0032981;GO:0032981;	K18161	-	-	-	-	101740353
BGIBMGA003547	36.0771	11.1174	61.0368	5.49021	2.45686	0.000228237	0.00233643	scaf9	2353213	2353965	-	753	-	GO:0003677;GO:0003700;GO:0003700;GO:0005634;GO:0005634;GO:0006355;GO:0006355;GO:0043565;GO:0043565;	K09411	-	-	-	-	101741019
BGIBMGA003730	218.118	132.906	303.33	2.28228	1.19048	0.000232229	0.00237351	scaf9	6580515	6582746	+	723	-	GO:0003723;GO:0003723;GO:0005634;GO:0005634;GO:0005737;GO:0005737;GO:0006397;GO:0006397;	K12839	-	-	-	-	101736899
BGIBMGA007924	129.77	83.6743	175.866	2.10179	1.07162	0.000236265	0.002409	scaf3	6901422	6909481	+	1071	-	GO:0005515;GO:0010997;GO:0010997;GO:0097027;GO:0097027;GO:1904668;GO:1904668;	-	-	-	-	-	-
BGIBMGA014257	27.8744	2.60602	53.1427	20.3923	4.34995	0.000238556	0.00242466	scaf80	461743	470879	+	1005	-	GO:0016020;GO:0016021;GO:0016021;GO:0016021;GO:0055085;GO:0055085;	-	-	-	-	-	-
BGIBMGA011531	38.824	16.8888	60.7592	3.59761	1.84704	0.000245016	0.00247676	scaf22	1121163	1138665	+	1338	-	GO:0006629;GO:0006629;GO:0006650;GO:0008081;GO:0008081;GO:0047396;	-	-	-	-	-	101743953
BGIBMGA011551	69.2939	38.1242	100.464	2.63517	1.3979	0.000245108	0.00247676	scaf22	2425435	2428221	+	591	-	GO:0016020;GO:0016021;GO:0016021;	-	-	-	-	-	-
BGIBMGA004467	14.0624	2.17087	25.9539	11.9555	3.57961	0.000245226	0.00247676	scaf37	2185815	2186731	+	750	-	GO:0005576;GO:0005576;	-	-	-	-	-	-
BGIBMGA012934	494.012	321.007	667.017	2.07789	1.05512	0.000249619	0.00251322	scaf4	608181	615695	+	864	-	GO:0004733;GO:0004733;GO:0005885;GO:0005885;GO:0008615;GO:0008615;GO:0010181;GO:0010181;GO:0015629;GO:0015629;GO:0030041;GO:0030041;GO:0030833;GO:0030833;GO:0034314;GO:0034314;GO:0042823;GO:0048037;GO:0048037;	-	-	-	-	-	-
BGIBMGA009882	18.1156	4.21266	32.0185	7.60053	2.9261	0.000293124	0.00289448	scaf51	700581	717077	+	699	-	-	-	-	-	-	-	-
BGIBMGA007658	38.4282	17.1039	59.7526	3.49351	1.80468	0.000305479	0.00299574	scaf3	7309611	7311201	-	285	-	-	-	-	-	-	-	-
BGIBMGA001007	635.22	369	901.44	2.44293	1.28861	0.000308728	0.00302299	scaf1	5739895	5745889	-	2223	-	GO:0016020;GO:0016021;GO:0016021;GO:0016021;GO:0055085;GO:0055085;	-	-	-	-	-	-
BGIBMGA010948	115.681	74.2447	157.117	2.11621	1.08148	0.000313179	0.00305493	scaf68	1954424	1958837	+	2187	-	-	-	-	-	-	-	100327241
BGIBMGA006553	56.0125	29.3928	82.6322	2.81131	1.49124	0.000314225	0.0030628	scaf10	6674546	6674785	-	240	-	GO:0016020;GO:0016021;GO:0016021;	-	-	-	-	-	-
BGIBMGA008215	73.6578	41.7296	105.586	2.53024	1.33928	0.000338379	0.00326199	scaf121	586826	587935	-	1110	-	GO:0016491;GO:0016491;GO:0055114;GO:0055114;	-	-	-	-	-	101744754
BGIBMGA010277	103.486	64.5667	142.404	2.20554	1.14113	0.000339794	0.00327227	scaf15	5281118	5286838	+	705	-	-	-	-	-	-	-	101737964
BGIBMGA008533	95.5917	58.7905	132.393	2.25194	1.17117	0.000346992	0.0033201	scaf2	8342619	8346604	+	1326	-	GO:0005515;	-	-	-	-	-	-
BGIBMGA009377	75.2941	43.2023	107.386	2.48566	1.31363	0.000353567	0.00337453	scaf53	1971619	1972716	+	1098	-	-	-	-	-	-	-	-
BGIBMGA001594	254.195	150.713	357.677	2.37323	1.24685	0.00036019	0.00343264	scaf7	7145417	7158640	+	1215	-	GO:0000166;GO:0005524;GO:0005524;GO:0016301;GO:0016307;GO:0016307;GO:0016307;GO:0016310;GO:0016740;GO:0046488;GO:0046488;GO:0046488;GO:0046854;	-	-	-	-	-	-
BGIBMGA002868	108.235	68.5163	147.953	2.15939	1.11062	0.000363277	0.00345651	scaf30	745112	749831	+	1596	-	GO:0006024;GO:0015012;GO:0016021;GO:0016857;GO:0047464;	-	-	-	-	-	-
BGIBMGA011373	140.56	74.0345	207.086	2.79715	1.48396	0.000369166	0.00349225	scaf12	3757035	3785305	+	2979	-	GO:0004672;GO:0004672;GO:0005524;GO:0005524;GO:0006468;GO:0006468;	-	-	-	-	-	-
BGIBMGA004247	83.4348	49.7149	117.155	2.35653	1.23667	0.000377936	0.00356209	scaf150	33242	40677	+	1032	-	GO:0008152;GO:0016020;GO:0016021;GO:0016021;GO:0016746;GO:0016746;	-	-	-	-	-	-
BGIBMGA001118	428.901	206.821	650.98	3.14755	1.65423	0.000446871	0.00406554	scaf1	3831478	3840079	+	825	-	GO:0000287;GO:0000287;GO:0005737;GO:0005737;GO:0008253;GO:0008253;GO:0016311;	-	-	-	-	-	-
BGIBMGA012770	86.6221	52.3209	120.923	2.31119	1.20863	0.000451329	0.00409739	scaf4	8265089	8267286	-	390	-	-	-	-	-	-	-	-
BGIBMGA001473	684.814	231.003	1138.62	4.92905	2.30131	0.000477146	0.00431346	scaf7	418567	433423	-	2304	-	GO:0005215;GO:0005215;GO:0006811;GO:0006811;GO:0016020;GO:0016020;GO:0016020;GO:0016021;GO:0016021;GO:0055085;GO:0055085;	-	-	-	-	-	-
BGIBMGA005622	29.0087	11.3756	46.6418	4.10018	2.03569	0.00051104	0.00458436	scaf33	1260229	1261048	+	357	-	GO:0003723;GO:0003723;GO:0005739;GO:0005739;GO:0010738;GO:0010738;GO:0034237;GO:0034237;	-	-	-	-	-	-
BGIBMGA004301	23.873	8.07622	39.6697	4.91192	2.29629	0.000573634	0.00506099	scaf79	561128	570337	-	933	-	-	-	-	-	-	-	-
BGIBMGA002542	39.2768	18.4094	60.1443	3.26705	1.70799	0.000606183	0.00529358	scaf14	5535237	5544013	+	1350	-	GO:0000166;GO:0003924;GO:0003924;GO:0003924;GO:0005200;GO:0005200;GO:0005525;GO:0005525;GO:0005525;GO:0005737;GO:0005737;GO:0005856;GO:0005874;GO:0005874;GO:0005874;GO:0007010;GO:0007017;GO:0007017;	-	-	-	-	-	-
BGIBMGA014519	59.0433	32.9503	85.1362	2.58378	1.36948	0.00064116	0.00556872	scaf424	17957	19389	-	420	-	-	-	-	-	-	-	-
BGIBMGA013755	7.18765	0	14.3753	Inf	Inf	0.000647958	0.00561637	scaf47	1044767	1067889	-	924	-	-	-	-	-	-	-	-
BGIBMGA004566	60.3591	33.3903	87.328	2.61537	1.38701	0.000651736	0.00562632	scaf48	974298	975383	-	1086	-	GO:0016020;GO:0016021;GO:0016021;GO:0016021;GO:0022857;GO:0022857;GO:0055085;GO:0055085;	-	-	-	-	-	-
BGIBMGA006029	37.0412	16.7597	57.3227	3.42027	1.77411	0.000654613	0.00563978	scaf5	1711197	1714099	-	711	-	GO:0008146;GO:0008146;GO:0016021;GO:0016021;	-	-	-	-	-	-
BGIBMGA005354	50.7464	26.5716	74.9212	2.81959	1.49549	0.000669153	0.00573808	scaf19	2545421	2549634	-	309	-	-	-	-	-	-	-	-
BGIBMGA000998	62.8131	35.4321	90.1942	2.54555	1.34798	0.000679585	0.00581589	scaf1	6464512	6466428	-	375	-	GO:0030431;GO:0032222;GO:0034235;GO:1903818;	-	-	-	-	-	-
BGIBMGA003814	192.523	90.0862	294.959	3.27419	1.71114	0.000702677	0.00599353	scaf107	729279	737871	-	900	-	GO:0006629;GO:0006629;GO:0008081;GO:0008081;GO:0008889;GO:0008889;	-	-	-	-	-	-
BGIBMGA008522	90.3806	56.7487	124.013	2.1853	1.12783	0.000758444	0.00639007	scaf2	7386266	7386968	+	627	-	GO:0005975;GO:0005975;GO:0016020;GO:0016021;GO:0016021;GO:0016757;GO:0016757;	-	-	-	-	-	-
BGIBMGA014109	361.402	230.781	492.024	2.132	1.0922	0.000769362	0.00644667	scaf76	1014802	1022009	-	1596	-	GO:0007165;GO:0007165;	-	-	-	-	-	-
BGIBMGA012103	366.368	219.76	512.975	2.33425	1.22296	0.000778578	0.00650555	scaf24	2457515	2467047	+	1881	-	GO:0003677;GO:0003677;GO:0003824;GO:0003824;GO:0004518;GO:0004518;GO:0005634;GO:0005634;GO:0006281;GO:0006281;GO:0016788;GO:0016788;GO:0035312;GO:0035312;GO:0090305;	-	-	-	-	-	-
BGIBMGA004814	115.205	71.2945	159.115	2.2318	1.15821	0.000782009	0.00652284	scaf46	1248865	1252268	-	1767	-	GO:0016020;GO:0016021;GO:0016021;GO:0016021;	-	-	-	-	-	-
BGIBMGA012109	116.839	77.2908	156.388	2.02337	1.01676	0.000823551	0.00683151	scaf24	3005073	3006597	+	375	-	-	-	-	-	-	-	-
BGIBMGA003410	98.8935	63.7825	134.004	2.10096	1.07105	0.000824337	0.00683151	scaf42	1440052	1440393	+	342	-	-	-	-	-	-	-	-
BGIBMGA000298	82.4693	50.9724	113.966	2.23584	1.16082	0.000832692	0.00687413	scaf18	1870033	1882127	-	1071	-	GO:0005576;GO:0005576;GO:0006030;GO:0006030;GO:0008061;GO:0008061;	-	-	-	-	-	-
BGIBMGA004033	24.7242	4.81992	44.6285	9.2592	3.21089	0.000861824	0.00703099	scaf36	853436	853871	-	363	-	-	-	-	-	-	-	-
BGIBMGA012067	53.4826	29.1777	77.7875	2.66599	1.41467	0.000868023	0.00705241	scaf24	894766	903481	-	1173	-	-	-	-	-	-	-	-
BGIBMGA010052	14.5356	3.12723	25.944	8.29618	3.05245	0.000876633	0.00710438	scaf45	286595	289123	+	477	-	GO:0003677;GO:0003677;GO:0003677;GO:0005634;GO:0005634;	-	-	-	-	-	-
BGIBMGA009997	10.0015	1.08543	18.9175	17.4285	4.12338	0.000903285	0.00730193	scaf170	42495	46499	+	729	-	-	-	-	-	-	-	-
BGIBMGA013822	6.79097	0	13.5819	Inf	Inf	0.000912497	0.00736712	scaf62	1747829	1757409	-	1641	-	GO:0003824;GO:0003824;GO:0004415;GO:0004415;GO:0004415;GO:0005975;GO:0005975;GO:0006952;GO:0006952;GO:0008152;GO:0016787;GO:0016798;	-	-	-	-	Hyaluronidase[Source:UniProtKB/TrEMBL;Acc:H9JWA8]	-
BGIBMGA005748	87.8232	55.8735	119.773	2.14365	1.10007	0.00094202	0.00756741	scaf54	2180810	2195572	-	1344	-	GO:0005198;GO:0005198;GO:0005515;	-	-	-	-	-	-
BGIBMGA005661	84.4655	45.0719	123.859	2.74803	1.4584	0.00094964	0.00761009	scaf33	2809822	2810172	+	351	-	-	-	-	-	-	-	-
BGIBMGA000941	102.277	65.8292	138.725	2.10735	1.07543	0.00102677	0.0081412	scaf1	9302120	9306751	-	861	-	GO:0005515;	-	-	-	-	-	-
BGIBMGA000305	123.24	78.9404	167.54	2.12236	1.08567	0.00107713	0.00849851	scaf18	1692908	1706179	-	1350	-	GO:0003677;GO:0005634;GO:0005634;GO:0006355;GO:0006355;GO:0043565;GO:0043565;GO:0046872;GO:0046872;	-	-	-	-	-	-
BGIBMGA012065	26.046	10.161	41.9309	4.12664	2.04497	0.00108694	0.00855493	scaf24	969881	971945	-	609	-	GO:0005198;GO:0005198;GO:0005604;GO:0005604;GO:0007155;GO:0007155;	-	-	-	-	-	-
BGIBMGA002672	58.9289	33.9066	83.9511	2.47595	1.30798	0.00109739	0.00862127	scaf20	1637628	1647222	+	444	-	-	-	-	-	-	-	-
BGIBMGA003487	41.7648	20.7572	62.7724	3.02412	1.59652	0.00112814	0.00879288	scaf9	5852849	5860507	-	756	-	-	-	-	-	-	-	-
BGIBMGA009212	85.4192	54.4869	116.351	2.1354	1.09451	0.00113952	0.00887086	scaf38	2519290	2524204	-	600	-	GO:0016020;GO:0016021;GO:0016021;	-	-	-	-	-	-
BGIBMGA013581	33.8687	15.5022	52.2352	3.36954	1.75255	0.00117585	0.009104	scaf78	964209	965276	-	1068	-	GO:0005267;GO:0005267;GO:0006811;GO:0016020;GO:0016020;GO:0016020;GO:0016021;GO:0016021;GO:0071805;GO:0071805;	K05323	-	-	-	-	101739915
BGIBMGA008441	138.151	89.0966	187.206	2.10116	1.07119	0.00119377	0.00922602	scaf2	1732807	1735995	+	1116	-	-	-	-	-	-	-	-
BGIBMGA011637	48.3659	25.7923	70.9394	2.75041	1.45965	0.00120714	0.00931253	scaf16	3475178	3475745	-	288	-	-	-	-	-	-	-	-
BGIBMGA001601	121.025	56.2324	185.818	3.30447	1.72442	0.00123358	0.00948801	scaf7	8241880	8244851	+	948	-	GO:0016020;GO:0016021;GO:0016021;GO:0016021;GO:0022857;GO:0022857;GO:0055085;GO:0055085;	-	-	-	-	-	-
BGIBMGA014043	82.6052	51.6706	113.54	2.19738	1.13578	0.00124826	0.00958945	scaf206	19536	32311	-	1473	-	GO:0004497;GO:0004497;GO:0005506;GO:0005506;GO:0016491;GO:0016705;GO:0016705;GO:0020037;GO:0020037;GO:0046872;GO:0055114;GO:0055114;GO:0055114;	K15001	EC:1.14.-.-	-	-	-	101737305
BGIBMGA009774	62.0913	36.3836	87.7991	2.41315	1.27092	0.00127478	0.00972912	scaf27	3291147	3295935	+	4503	RHL	GO:0003676;GO:0003676;GO:0005524;GO:0005524;	-	-	-	-	RNA helicase-like protein [Source:UniProtKB/Swiss-Prot;Acc:Q1XG89]	-
BGIBMGA004830	100.964	66.6036	135.323	2.03177	1.02274	0.00127624	0.00973444	scaf46	156027	166100	-	2013	-	GO:0004181;GO:0004181;GO:0004930;GO:0004930;GO:0004930;GO:0006508;GO:0006508;GO:0007165;GO:0007186;GO:0007186;GO:0007186;GO:0008270;GO:0008270;GO:0016020;GO:0016021;GO:0016021;GO:0016021;	-	-	-	-	-	-
BGIBMGA013336	52.2171	28.9625	75.4718	2.60584	1.38175	0.00137586	0.0103407	scaf166	127499	144484	-	2091	-	GO:0000166;GO:0003951;GO:0003951;GO:0004143;GO:0004143;GO:0004143;GO:0005509;GO:0005509;GO:0005524;GO:0005524;GO:0005622;GO:0005622;GO:0007165;GO:0007165;GO:0007205;GO:0007205;GO:0016301;GO:0016301;GO:0016301;GO:0016310;GO:0016740;GO:0035556;GO:0035556;	-	-	-	-	-	-
BGIBMGA005728	80.4856	50.5852	110.386	2.18218	1.12577	0.00148794	0.0109585	scaf123	349046	360292	-	975	-	GO:0004725;GO:0004725;GO:0006470;GO:0006470;GO:0008138;GO:0008138;GO:0016311;GO:0016311;GO:0016791;GO:0016791;GO:0035335;	-	-	-	-	-	-
BGIBMGA003559	96.93	64.0406	129.819	2.02714	1.01944	0.00153837	0.0112717	scaf9	1956033	1956932	-	222	-	-	-	-	-	-	-	-
BGIBMGA007527	23.0626	8.7265	37.3986	4.28564	2.09951	0.00161124	0.0117055	scaf66	872115	872945	-	831	-	-	-	-	-	-	-	101742824
BGIBMGA004585	1294.61	422.929	2166.29	5.1221	2.35674	0.00167015	0.0120583	scaf48	860737	871504	+	5349	VG	GO:0005319;GO:0005319;GO:0006869;GO:0006869;	-	-	-	-	Vitellogenin Vitellin light chain Vitellin lightchain rare isoform Vitellin heavy chain rare isoformVitellin heavy chain [Source:UniProtKB/Swiss-Prot;Acc:Q27309]	-
BGIBMGA003130	14.731	3.82053	25.6415	6.7115	2.74664	0.00171501	0.0123225	scaf13	3226262	3226587	+	213	-	-	-	-	-	-	-	-
BGIBMGA010014	11.6144	2.08482	21.144	10.1419	3.34225	0.00171537	0.0123225	scaf45	1743670	1747351	-	1107	-	-	-	-	-	-	-	-
BGIBMGA012060	46.7531	25.185	68.3212	2.71277	1.43977	0.00174194	0.0124784	scaf24	1650326	1667011	-	5142	-	GO:0005089;GO:0005089;GO:0035023;GO:0035023;	-	-	-	-	-	-
BGIBMGA013536	1965.14	1130.68	2799.6	2.47603	1.30803	0.00194144	0.0136411	scaf101	956749	958038	+	1056	DNAJ-5	GO:0006457;GO:0006457;GO:0051082;GO:0051082;	-	-	-	-	DnaJ-5 [Source:UniProtKB/TrEMBL;Acc:H6VTP5]"	692539
BGIBMGA005959	69.8956	42.9871	96.8041	2.25193	1.17116	0.00199287	0.0139262	scaf5	7054892	7057417	-	1206	-	-	-	-	-	-	-	-
BGIBMGA003128	194.206	86.1943	302.219	3.50625	1.80993	0.00235715	0.0159677	scaf13	3202263	3203047	+	234	-	-	-	-	-	-	-	-
BGIBMGA006010	51.7207	29.5268	73.9146	2.50331	1.32384	0.00244333	0.0164732	scaf5	3710396	3710668	-	273	-	-	-	-	-	-	-	-
BGIBMGA000639	27.4022	11.7677	43.0367	3.65719	1.87074	0.00266007	0.0176564	scaf8	2214105	2215018	+	810	-	GO:0003677;GO:0003677;GO:0003677;GO:0005634;GO:0005634;GO:0005634;GO:0006355;GO:0006355;GO:0043565;GO:0043565;	-	-	-	-	-	-
BGIBMGA012491	455.503	298.754	612.253	2.04936	1.03517	0.00286519	0.0187273	scaf56	758638	767858	+	1584	-	-	K19176	EC:3.5.1.99	-	-	-	101741517
BGIBMGA001410	28.9362	13.5464	44.326	3.27216	1.71024	0.00290959	0.0189885	scaf7	6078917	6082848	-	3165	-	GO:0003676;GO:0003676;	-	-	-	-	-	-
BGIBMGA010837	572.206	351.95	792.462	2.25164	1.17097	0.00294939	0.0192111	scaf25	3964696	3976105	+	1389	-	GO:0005337;GO:0005337;GO:0016020;GO:0016021;GO:0016021;GO:0016021;GO:1901642;GO:1901642;	-	-	-	-	-	-
BGIBMGA005472	174.665	88.5372	260.794	2.94558	1.55855	0.00298249	0.0193365	scaf19	3870164	3877893	+	897	PDXK	GO:0008478;GO:0008478;GO:0009443;GO:0009443;GO:0016301;GO:0016310;	K00868	EC:2.7.1.35	-	-	Pyridoxal kinase[Source:UniProtKB/TrEMBL;Acc:Q1PCB1]	693009
BGIBMGA009695	77.0166	49.8009	104.232	2.09298	1.06556	0.00300577	0.0194481	scaf27	700072	711432	-	1440	-	GO:0004553;GO:0004553;GO:0005975;GO:0005975;GO:0008061;GO:0008061;GO:0008152;GO:0016787;GO:0016798;	-	-	-	-	-	-
BGIBMGA004282	386.239	217.513	554.965	2.55141	1.35129	0.00315248	0.0202342	scaf79	936301	938171	-	432	-	-	-	-	-	-	-	-
BGIBMGA000418	18.3251	6.55563	30.0945	4.59063	2.19869	0.00325035	0.0207174	scaf18	2725637	2735090	+	933	-	-	-	-	-	-	-	-
BGIBMGA010050	7.20696	0.56423	13.8497	24.5462	4.61743	0.00343843	0.0216823	scaf45	211770	212336	+	318	-	-	-	-	-	-	-	-
BGIBMGA008736	97.489	64.6528	130.325	2.01577	1.01133	0.00347752	0.0218936	scaf115	820596	825754	-	1152	-	-	-	-	-	-	-	-
BGIBMGA009859	76.3109	49.887	102.735	2.05935	1.04219	0.00349881	0.022006	scaf51	697485	698377	-	426	-	GO:0003824;GO:0003824;	-	-	-	-	-	-
BGIBMGA008958	156.769	51.5845	261.954	5.07815	2.3443	0.00370906	0.0230127	scaf17	1169339	1179920	+	2703	-	GO:0001944;GO:0001944;GO:0005515;GO:0008191;GO:0008191;GO:0060828;GO:0060828;GO:1904684;GO:1904684;	-	-	-	-	-	-
BGIBMGA012848	69.7368	44.3356	95.138	2.14586	1.10156	0.0037677	0.023264	scaf4	3694417	3701924	-	492	-	GO:0005515;	-	-	-	-	-	-
BGIBMGA013237	351.35	37.4788	665.22	17.7493	4.14969	0.00383044	0.0235721	scaf39	1611522	1613971	+	1572	-	GO:0004497;GO:0004497;GO:0005506;GO:0005506;GO:0016020;GO:0016021;GO:0016021;GO:0016491;GO:0016705;GO:0016705;GO:0020037;GO:0020037;GO:0046872;GO:0055114;GO:0055114;GO:0055114;	-	-	-	-	-	-
BGIBMGA005813	49.2707	27.0068	71.5346	2.64876	1.40532	0.00399688	0.0243808	scaf54	1108720	1109586	+	384	-	GO:0005634;GO:0005634;GO:0046982;GO:0046982;	K11656	-	-	-	-	101740858
BGIBMGA006775	30.0772	14.5888	45.5656	3.12332	1.64308	0.0040128	0.0244598	scaf10	6241444	6241983	+	540	LEB1/2	-	-	-	-	-	Lebocin-3 [Source:UniProtKB/Swiss-Prot;Acc:P55796]	-
BGIBMGA011025	1845.28	1205.88	2484.69	2.06048	1.04298	0.00410195	0.0249322	scaf31	3012999	3016598	-	3600	-	GO:0005515;GO:0007165;GO:0007165;GO:0016020;GO:0016021;GO:0016021;	-	-	-	-	-	-
BGIBMGA012205	76.3517	34.9588	117.745	3.3681	1.75193	0.00412711	0.0250377	scaf75	1522153	1526119	+	351	-	-	-	-	-	-	-	-
BGIBMGA013132	31.5845	10.8543	52.3146	4.81969	2.26894	0.00413954	0.0250894	scaf124	3144	9799	-	750	-	GO:0003677;GO:0003677;GO:0003700;GO:0003700;GO:0005634;GO:0005634;GO:0005634;GO:0006351;GO:0006355;GO:0006355;	-	-	-	-	-	-
BGIBMGA000319	110.519	70.477	150.562	2.13632	1.09513	0.00433503	0.0260772	scaf18	869323	875174	-	3171	-	GO:0003676;GO:0003676;GO:0005515;	-	-	-	-	-	-
BGIBMGA000711	53.0452	32.0418	74.0485	2.31099	1.20851	0.00453309	0.0269653	scaf8	5792433	5799601	+	1266	-	GO:0005515;	-	-	-	-	-	-
BGIBMGA000726	25.0351	11.4616	38.6086	3.36852	1.75211	0.00456657	0.0271268	scaf8	6671791	6672971	+	795	-	-	-	-	-	-	-	-
BGIBMGA003387	57.0088	35.1691	78.8486	2.24199	1.16478	0.00465124	0.0275533	scaf42	456715	467611	+	1152	-	GO:0016020;GO:0016021;GO:0016021;GO:0022857;	-	-	-	-	-	-
BGIBMGA002431	50.8252	30.2201	71.4303	2.36367	1.24103	0.00468458	0.0276996	scaf14	1333610	1337105	-	387	-	GO:0004788;GO:0004788;GO:0005524;GO:0005524;GO:0009229;GO:0009229;GO:0030975;GO:0030975;	-	-	-	-	-	-
BGIBMGA009643	32.5083	16.9318	48.0847	2.83991	1.50584	0.00482435	0.0283706	scaf27	4282675	4284238	-	1074	INV	-	-	-	-	-	Homeobox protein invected [Source:UniProtKB/Swiss-Prot;Acc:P27610]	-
BGIBMGA006280	47.9903	28.2643	67.7162	2.39582	1.26052	0.00482457	0.0283706	scaf49	1258263	1259038	-	192	CECA	GO:0002376;GO:0005576;GO:0005576;GO:0005576;GO:0019731;GO:0019731;GO:0042742;GO:0045087;GO:0045087;	-	-	-	-	Cecropin-A [Source:UniProtKB/Swiss-Prot;Acc:Q27239]	-
BGIBMGA010908	36.7429	19.8869	53.5988	2.69518	1.43038	0.0053681	0.030957	scaf195	44377	45666	-	1290	-	GO:0005634;GO:0005634;GO:0005737;GO:0005739;GO:0005759;GO:0005759;GO:0008033;GO:0008168;GO:0009019;GO:0009019;GO:0009019;GO:0016740;GO:0030488;GO:0030488;GO:0030488;GO:0032259;GO:0052906;GO:0052906;	-	-	-	-	tRNA (guanine(37)-N1)-methyltransferase[Source:UniProtKB/TrEMBL;Acc:H9JN05]	-
BGIBMGA010759	199.196	129.789	268.604	2.06955	1.04932	0.00565934	0.0322884	scaf25	887747	889333	-	1587	-	-	-	-	-	-	-	101746023
BGIBMGA013638	17.4093	6.46958	28.349	4.38189	2.13155	0.0056905	0.0323972	scaf78	1123851	1139965	+	1134	-	GO:0016020;GO:0016021;GO:0016021;	-	-	-	-	-	-
BGIBMGA006320	49.2092	29.7849	68.6336	2.30431	1.20433	0.00656828	0.036297	scaf49	1614575	1616841	+	627	-	-	-	-	-	-	-	-
BGIBMGA000637	27.5015	13.6325	41.3706	3.03471	1.60156	0.00671728	0.0368818	scaf8	2010959	2011651	+	564	-	-	-	-	-	-	-	-
BGIBMGA009644	8.75215	1.60664	15.8977	9.89498	3.3067	0.00703885	0.0382981	scaf27	4208266	4209206	-	399	-	GO:0003677;GO:0003677;GO:0003677;GO:0005634;GO:0005634;GO:0005634;GO:0006355;GO:0006355;GO:0007275;GO:0007275;GO:0043565;GO:0043565;	-	-	-	-	Homeobox protein engrailed[Source:UniProtKB/TrEMBL;Acc:H9JJE3]	-
BGIBMGA004560	28.7441	14.4167	43.0714	2.9876	1.57899	0.00705571	0.0383626	scaf48	1080054	1085918	-	1437	-	GO:0005215;GO:0005215;GO:0016020;GO:0016020;GO:0016020;GO:0016021;GO:0016021;GO:0016021;GO:0022857;GO:0022857;GO:0055085;GO:0055085;	-	-	-	-	-	-
BGIBMGA011859	7.68495	1.12846	14.2414	12.6202	3.65767	0.00710288	0.0385212	scaf16	4564322	4570141	+	1887	-	GO:0005515;	K10448	-	-	-	-	101742076
BGIBMGA002266	34.5374	18.8875	50.1872	2.65716	1.40988	0.00723693	0.0390995	scaf34	1402799	1407639	-	597	-	GO:0016020;GO:0016021;GO:0016021;GO:0022857;	-	-	-	-	-	-
BGIBMGA001419	7.61881	1.08543	14.1522	13.0383	3.70468	0.00729669	0.0393561	scaf7	5214603	5217863	-	1089	-	GO:0004497;GO:0004497;GO:0005506;GO:0005506;GO:0016491;GO:0016705;GO:0016705;GO:0020037;GO:0020037;GO:0046872;GO:0055114;GO:0055114;GO:0055114;	-	-	-	-	-	-
BGIBMGA003131	12.6566	3.77751	21.5357	5.70104	2.51122	0.00738371	0.0397754	scaf13	3245347	3247412	+	468	-	-	-	-	-	-	-	-
BGIBMGA009243	42.9912	25.3571	60.6253	2.39086	1.25753	0.00739551	0.0398055	scaf38	747617	750852	-	1800	-	GO:0005794;GO:0006486;GO:0006486;GO:0008417;GO:0008417;GO:0016020;GO:0016020;GO:0016020;GO:0016021;GO:0016021;GO:0016740;GO:0016757;GO:0032580;GO:0032580;GO:0036065;	-	-	-	-	-	-
BGIBMGA000554	61.7353	39.946	83.5246	2.09094	1.06415	0.00744345	0.0399965	scaf8	3596005	3597648	-	1287	-	-	-	-	-	-	-	-
BGIBMGA010427	68.3811	43.7714	92.9909	2.12447	1.0871	0.00749532	0.0402247	scaf6	3134812	3135398	-	153	-	-	-	-	-	-	-	-
BGIBMGA014047	64.0646	37.469	90.6602	2.4196	1.27477	0.00755701	0.0404374	scaf274	24103	32847	-	1401	-	GO:0006629;GO:0006629;GO:0016491;GO:0055114;GO:0080019;GO:0080019;GO:0102965;GO:0102965;	-	-	-	-	-	-
BGIBMGA012133	29.4428	15.11	43.7755	2.89712	1.53462	0.00769967	0.0410638	scaf24	4721118	4725179	+	657	-	-	-	-	-	-	-	-
BGIBMGA013646	26.7175	7.90412	45.5309	5.7604	2.52617	0.00772351	0.0411534	scaf78	1722325	1725658	+	582	-	GO:0016020;GO:0016021;GO:0016021;GO:0016491;GO:0016491;GO:0055114;	-	-	-	-	-	-
BGIBMGA012606	4.84962	0	9.69924	Inf	Inf	0.00781103	0.0414743	scaf100	530434	533506	+	981	-	-	-	-	-	-	-	101744936
BGIBMGA000733	91.6567	58.4032	124.91	2.13876	1.09677	0.00828554	0.0435017	scaf8	6882945	6895778	+	1770	-	GO:0000139;GO:0000139;GO:0005794;GO:0006486;GO:0006486;GO:0016020;GO:0016021;GO:0016021;GO:0016740;GO:0016757;GO:0016757;GO:0030246;GO:0030246;	-	-	-	-	-	-
BGIBMGA011073	86.895	51.2354	122.555	2.39199	1.25821	0.00856848	0.0445509	scaf31	1231289	1235399	+	1155	-	GO:0005515;	-	-	-	-	-	101736384
BGIBMGA005444	250.72	159.751	341.69	2.1389	1.09687	0.00867996	0.0450019	scaf19	1630820	1632747	+	1233	-	GO:0016491;GO:0016627;GO:0016627;GO:0050660;GO:0050660;GO:0050660;GO:0055114;GO:0055114;GO:0055114;	-	-	-	-	-	-
BGIBMGA001449	17.5633	6.99079	28.1357	4.02469	2.00888	0.00887594	0.0458329	scaf7	2713124	2713477	-	354	-	-	-	-	-	-	-	-
BGIBMGA006048	24.5154	11.8107	37.2201	3.15139	1.65599	0.00913979	0.0468747	scaf5	1015603	1022574	-	1038	-	GO:0016020;GO:0016021;GO:0016021;GO:0016491;GO:0016491;GO:0055114;	-	-	-	-	-	-
BGIBMGA009432	55.953	35.9533	75.9528	2.11254	1.07898	0.00923903	0.0471952	scaf40	3612950	3628284	-	552	TOY	GO:0003677;GO:0003677;GO:0003677;GO:0005634;GO:0005634;GO:0006351;GO:0006351;GO:0006355;GO:0006355;GO:0006355;GO:0007275;GO:0007275;	K08031	-	-	-	Pak6 [Source:UniProtKB/TrEMBL;Acc:E9JEI5]"	100529217
BGIBMGA000640	31.9489	17.2809	46.6169	2.69759	1.43167	0.00945199	0.0480536	scaf8	2294412	2306707	+	1326	-	GO:0004497;GO:0004497;GO:0005506;GO:0005506;GO:0016491;GO:0016705;GO:0016705;GO:0020037;GO:0020037;GO:0046872;GO:0055114;GO:0055114;GO:0055114;	-	-	-	-	-	-
BGIBMGA010980	92.3135	48.5101	136.117	2.80595	1.48849	0.00953903	0.0484193	scaf83	193394	194278	-	885	-	GO:0003677;GO:0003677;GO:0003677;GO:0005634;GO:0005634;GO:0006355;GO:0006355;GO:0043565;GO:0043565;	K09310	-	-	-	-	101743730
BGIBMGA010481	358.523	236.219	480.827	2.03551	1.02539	0.00977862	0.0493052	scaf6	356425	362840	-	1269	-	GO:0003677;GO:0003677;GO:0003700;GO:0003700;GO:0005515;GO:0005622;GO:0005622;GO:0005634;GO:0005634;GO:0005667;GO:0005667;GO:0005737;GO:0005737;GO:0006351;GO:0006355;GO:0006355;GO:0007179;GO:0007179;	K04676	-	-	-	-	101742798
BGIBMGA000669	44.5433	26.9638	62.1228	2.30394	1.2041	0.00979465	0.0493655	scaf8	3706977	3711661	+	1935	-	-	-	-	-	-	-	-
BGIBMGA002977	51.2726	32.434	70.1113	2.16166	1.11214	0.0100345	0.0502982	scaf13	5486633	5494117	-	1563	-	GO:0051726;GO:0051726;	-	-	-	-	-	101742364
BGIBMGA006277	62.7098	41.6817	83.7379	2.00899	1.00647	0.0101051	0.0506124	scaf49	1481539	1484552	-	807	-	GO:0003677;GO:0003677;GO:0005634;GO:0005634;GO:0006351;GO:0006351;GO:0006355;GO:0006355;	-	-	-	-	-	105843009
BGIBMGA004612	12180.8	5624.52	18737.1	3.33133	1.7361	0.0103414	0.0515745	scaf128	617708	619858	-	2151	HSP90	GO:0000166;GO:0005515;GO:0005524;GO:0005524;GO:0005524;GO:0005737;GO:0005737;GO:0006457;GO:0006457;GO:0006950;GO:0051082;GO:0051082;	K04079	-	-	-	90-kDa heat shock protein[Source:UniProtKB/TrEMBL;Acc:Q9BLC5]	692420
BGIBMGA005621	31.7076	17.3239	46.0913	2.66055	1.41173	0.0104434	0.0518899	scaf33	1245948	1248403	+	519	-	-	-	-	-	-	-	-
BGIBMGA013236	767.458	27.1887	1507.73	55.4543	5.79323	0.0106416	0.0525207	scaf39	1600636	1603780	+	1383	-	GO:0004497;GO:0004497;GO:0005506;GO:0005506;GO:0016020;GO:0016021;GO:0016021;GO:0016491;GO:0016705;GO:0016705;GO:0020037;GO:0020037;GO:0046872;GO:0055114;GO:0055114;GO:0055114;	-	-	-	-	-	-
BGIBMGA005108	10.1915	2.60602	17.777	6.82152	2.77009	0.0109109	0.0535001	scaf32	616736	617356	+	510	-	GO:0003677;GO:0003700;GO:0003700;GO:0005634;GO:0005634;GO:0005634;GO:0006355;GO:0006355;GO:0043565;GO:0043565;GO:0046872;GO:0046872;	-	-	-	-	-	-
BGIBMGA003858	133.59	80.4894	186.691	2.31944	1.21378	0.0113043	0.0551971	scaf72	1141421	1151389	-	1377	-	GO:0000166;GO:0004672;GO:0004672;GO:0004674;GO:0004674;GO:0004674;GO:0005524;GO:0005524;GO:0005524;GO:0006468;GO:0006468;GO:0016301;GO:0016310;GO:0016740;	-	-	-	-	-	-
BGIBMGA013485	105.819	68.6933	142.945	2.08092	1.05722	0.0119922	0.0577867	scaf101	831864	853742	-	1989	-	GO:0005215;GO:0005215;GO:0005515;GO:0005886;GO:0005886;GO:0006811;GO:0006811;GO:0016020;GO:0016020;GO:0016020;GO:0016021;GO:0016021;GO:0055085;GO:0055085;	-	-	-	-	-	-
BGIBMGA007154	266.598	144.636	388.56	2.68647	1.42571	0.012174	0.0583997	scaf74	832759	838937	-	2208	-	GO:0016020;GO:0016021;GO:0016021;GO:0016021;GO:0055085;GO:0055085;	-	-	-	-	-	101743728
BGIBMGA013585	22.3107	10.7683	33.8532	3.14378	1.6525	0.0125857	0.0598824	scaf78	745488	757918	-	1767	-	GO:0016020;GO:0016021;GO:0016021;GO:0016021;GO:0055085;GO:0055085;	-	-	-	-	-	-
BGIBMGA013015	4.41325	0	8.82651	Inf	Inf	0.0126438	0.0600699	scaf4	4918253	4924585	+	876	-	-	-	-	-	-	-	-
BGIBMGA010693	43.1822	26.9589	59.4055	2.20356	1.13984	0.0126692	0.0601461	scaf148	11230	11796	-	567	-	-	-	-	-	-	-	-
BGIBMGA001902	9.95102	2.60602	17.296	6.63695	2.73052	0.0129444	0.0611806	scaf28	792993	805611	-	771	-	GO:0000139;GO:0000139;GO:0005794;GO:0005975;GO:0008146;GO:0008146;GO:0016021;GO:0016021;GO:0016051;GO:0016051;GO:0016740;	-	-	-	-	-	-
BGIBMGA006142	4.36863	0	8.73726	Inf	Inf	0.0129711	0.0612844	scaf5	4124906	4125103	+	198	-	GO:0003677;GO:0003677;GO:0005634;GO:0005634;GO:0006351;GO:0006351;GO:0006355;GO:0006355;	-	-	-	-	-	-
BGIBMGA010701	16.7732	7.07684	26.4697	3.74032	1.90316	0.0134219	0.0629048	scaf148	270765	282358	+	963	-	GO:0005739;GO:0006811;GO:0006811;GO:0015075;GO:0015075;GO:0016020;GO:0016020;GO:0016020;GO:0016021;GO:0016021;GO:0031966;GO:0031966;GO:0034220;GO:0055085;GO:0055085;	-	-	-	-	-	101736404
BGIBMGA004619	54.9341	36.2115	73.6568	2.03407	1.02437	0.0147939	0.0678605	scaf128	214772	216457	-	912	-	GO:0000139;GO:0000139;GO:0005794;GO:0006486;GO:0006486;GO:0008378;GO:0008378;GO:0016020;GO:0016020;GO:0016020;GO:0016021;GO:0016021;GO:0016740;GO:0016757;	-	-	-	-	-	-
BGIBMGA005259	5.15705	0	10.3141	Inf	Inf	0.0148811	0.0681443	scaf58	599957	601102	-	957	BMORCPT3	-	-	-	-	-	Putative cuticle protein[Source:UniProtKB/TrEMBL;Acc:C0H6Z3]	-
BGIBMGA006737	76.0017	49.8488	102.155	2.04929	1.03512	0.0149497	0.0683682	scaf10	4254391	4255794	+	363	-	-	-	-	-	-	-	-
BGIBMGA004430	159.194	102.992	215.397	2.09139	1.06446	0.01519	0.0692224	scaf37	33262	45878	-	1785	-	GO:0003676;GO:0003676;	-	-	-	-	-	-
BGIBMGA011066	4061.39	2312.36	5810.42	2.51277	1.32928	0.0156783	0.070967	scaf31	684207	684410	+	204	-	-	-	-	-	-	-	101747015
BGIBMGA008514	13.9911	0	27.9821	Inf	Inf	0.0156895	0.0709925	scaf2	7071245	7073795	+	885	-	GO:0004252;GO:0004252;GO:0006508;GO:0006508;GO:0006508;GO:0008233;GO:0008236;GO:0016787;	-	-	-	-	-	-
BGIBMGA007999	27.3571	12.461	42.2532	3.39084	1.76164	0.0157276	0.0711148	scaf41	2079121	2079474	-	354	-	-	-	-	-	-	-	-
BGIBMGA005094	29.3219	16.1524	42.4913	2.63064	1.39542	0.0159359	0.0717535	scaf32	124909	134605	-	2184	-	GO:0000166;GO:0005524;GO:0005524;GO:0005524;GO:0016020;GO:0016020;GO:0016020;GO:0016021;GO:0016021;GO:0016887;GO:0016887;	-	-	-	-	-	-
BGIBMGA002019	69.7505	35.6854	103.816	2.90919	1.54062	0.0162657	0.0725813	scaf23	2453089	2459028	-	1383	-	GO:0003677;GO:0003677;GO:0046872;GO:0046872;	-	-	-	-	-	-
BGIBMGA005109	11.3649	3.77751	18.9523	5.01713	2.32686	0.0166527	0.0739692	scaf32	757839	758775	+	210	-	-	-	-	-	-	-	-
BGIBMGA011962	46.8596	21.5796	72.1396	3.34295	1.74112	0.0167345	0.0742552	scaf59	363719	377372	+	3825	-	GO:0016020;GO:0016021;GO:0016021;	-	-	-	-	-	-
BGIBMGA006394	52.3621	34.3897	70.3344	2.04522	1.03225	0.0169899	0.0751289	scaf11	2628103	2637204	-	819	-	GO:0003677;GO:0003677;GO:0003700;GO:0003700;GO:0006355;GO:0006355;	-	-	-	-	-	-
BGIBMGA011958	7.70665	1.56361	13.8497	8.85749	3.1469	0.0172531	0.0759875	scaf59	288473	291254	+	891	-	-	-	-	-	-	-	-
BGIBMGA008341	26.2117	14.1967	38.2267	2.69265	1.42903	0.0174405	0.07662	scaf2	5587147	5587512	-	366	-	GO:0008033;GO:0008033;GO:0016740;GO:0016740;	-	-	-	-	-	-
BGIBMGA003553	21.5892	10.7683	32.4102	3.00978	1.58966	0.0177395	0.0775092	scaf9	2059544	2070266	-	804	-	GO:0016020;GO:0016021;GO:0016021;	-	-	-	-	-	101740465
BGIBMGA003409	47.953	31.2194	64.6865	2.07199	1.05102	0.0179926	0.0783126	scaf42	1330882	1349271	+	1317	-	GO:0005215;GO:0005215;GO:0016020;GO:0016021;GO:0016021;GO:0016021;GO:0055085;GO:0055085;	-	-	-	-	-	-
BGIBMGA007852	44.5572	28.3553	60.7592	2.14278	1.09949	0.018249	0.0792229	scaf3	3680782	3683014	+	1137	-	GO:0008146;GO:0008146;	-	-	-	-	-	-
BGIBMGA013626	43.9869	28.2213	59.7526	2.11729	1.08222	0.0183651	0.0796461	scaf78	611226	621239	+	1785	-	GO:0003676;GO:0003676;	-	-	-	-	-	-
BGIBMGA006832	39.5858	24.6208	54.5509	2.21564	1.14773	0.0191682	0.0824604	scaf70	277405	278640	-	1236	-	GO:0003676;GO:0003676;GO:0003723;GO:0003723;	-	-	-	-	-	101737436
BGIBMGA004530	1117.76	713.248	1522.27	2.13428	1.09375	0.0196886	0.0839857	scaf97	824715	836990	+	1176	-	GO:0006812;GO:0006812;GO:0008324;GO:0008324;GO:0016020;GO:0016021;GO:0016021;GO:0098655;	-	-	-	-	-	-
BGIBMGA013902	40.9863	25.5771	56.3955	2.20492	1.14072	0.0198255	0.0844392	scaf29	2803916	2805855	-	552	-	GO:0003999;GO:0003999;GO:0005737;GO:0005737;GO:0006168;GO:0006168;GO:0009116;GO:0009116;	K00759	EC:2.4.2.7	-	-	-	101736026
BGIBMGA013780	17.7573	8.16227	27.3523	3.35106	1.74462	0.0200687	0.0850517	scaf47	383422	387706	+	1050	-	-	-	-	-	-	-	-
BGIBMGA009837	48.5228	31.9128	65.1328	2.04096	1.02925	0.020079	0.0850672	scaf51	2094376	2111549	-	1098	-	GO:0016020;GO:0016021;GO:0016021;	-	-	-	-	-	-
BGIBMGA006595	185.868	93.4813	278.254	2.97657	1.57365	0.0203011	0.0855935	scaf10	4891012	4892708	-	1635	-	-	-	-	-	-	-	-
BGIBMGA003274	9.42794	2.7351	16.1208	5.89404	2.55926	0.0203047	0.0855935	scaf73	1275368	1292997	+	876	-	GO:0016020;GO:0016021;GO:0016021;	-	-	-	-	-	-
BGIBMGA007371	42.488	27.0928	57.8831	2.13647	1.09523	0.0203076	0.0855935	scaf55	586451	588873	-	582	-	GO:0003677;GO:0003677;GO:0003677;GO:0005634;GO:0005634;GO:0006351;GO:0006351;GO:0006355;GO:0006355;	-	-	-	-	Bm8 interacting protein 2d-2[Source:UniProtKB/TrEMBL;Acc:D5MTP4]	100500750
BGIBMGA014321	44.131	27.1359	61.126	2.25259	1.17159	0.0238615	0.0970565	scaf1120	957	3658	+	336	-	-	-	-	-	-	-	-
BGIBMGA005208	95.4121	58.4365	132.388	2.2655	1.17983	0.0240097	0.0972895	scaf119	353100	353987	+	888	-	-	-	-	-	-	-	-
BGIBMGA004065	9.07589	2.7351	15.4167	5.6366	2.49483	0.0247308	0.0996764	scaf36	290984	293382	+	378	CSP5	-	-	-	-	-	Chemosensory protein 5; Chemosensory protein4[Source:UniProtKB/TrEMBL;Acc:Q3LBA3]	692615
BGIBMGA005814	22.1956	11.7677	32.6234	2.77229	1.47108	0.0252286	0.10103	scaf54	1143532	1146573	+	492	-	GO:0016020;GO:0016021;GO:0016021;	-	-	-	-	-	-
BGIBMGA011833	47.239	31.3485	63.1294	2.01379	1.00991	0.0253172	0.101245	scaf16	3025738	3036637	+	1131	-	GO:0005515;	-	-	-	-	-	-
BGIBMGA010430	12.8234	4.949	20.6977	4.18221	2.06427	0.0278951	0.109374	scaf6	2440029	2444006	-	324	-	GO:0003676;GO:0003676;GO:0003723;GO:0003723;GO:0016020;GO:0016021;GO:0016021;	-	-	-	-	-	-
BGIBMGA002041	26.4653	15.4973	37.4334	2.41548	1.27231	0.0284647	0.110997	scaf23	1267269	1268326	-	486	-	-	-	-	-	-	-	-
BGIBMGA007327	6.07	1.04241	11.0976	10.6461	3.41226	0.0285648	0.111218	scaf169	234619	237953	+	1665	-	GO:0008152;GO:0016020;GO:0016021;GO:0016021;GO:0016740;GO:0016758;GO:0016758;	-	-	-	-	-	-
BGIBMGA004285	9.71827	1.64967	17.7869	10.7821	3.43057	0.0287609	0.111711	scaf79	826626	828531	-	369	BM122	-	-	-	-	-	Bm122 [Source:UniProtKB/TrEMBL;Acc:C0LZJ2]"	100272181
BGIBMGA005972	135.239	86.7536	183.725	2.11778	1.08255	0.0288969	0.112103	scaf5	5940625	5947929	-	1566	-	GO:0004672;GO:0004672;GO:0004713;GO:0004713;GO:0005524;GO:0005524;GO:0006468;GO:0006468;GO:0016020;GO:0016021;GO:0016021;GO:0018108;	-	-	-	-	-	-
BGIBMGA003856	86.6505	57.485	115.816	2.01472	1.01058	0.0292321	0.113062	scaf72	1196096	1207924	-	1404	-	GO:0016020;GO:0016020;GO:0016020;GO:0016021;GO:0016021;GO:0022857;GO:0022857;GO:0055085;GO:0055085;	-	-	-	-	-	101746325
BGIBMGA008135	31.535	17.673	45.397	2.56872	1.36105	0.0296401	0.114124	scaf52	1702204	1707037	-	1674	-	GO:0005515;	-	-	-	-	-	-
BGIBMGA014097	4.91435	0.521204	9.3075	17.8577	4.15847	0.030352	0.116411	scaf528	11526	12377	+	852	-	GO:0005576;GO:0005576;	-	-	-	-	-	-
BGIBMGA012941	15.7907	7.38291	24.1986	3.27764	1.71266	0.0336589	0.126814	scaf4	1203644	1217615	+	1401	-	GO:0003824;GO:0003824;GO:0008152;GO:0016020;GO:0016021;GO:0016021;	-	-	-	-	-	-
BGIBMGA006143	30.8043	18.9736	42.6351	2.24707	1.16805	0.0341302	0.127977	scaf5	4126755	4127294	+	540	-	GO:0003677;GO:0003677;GO:0005634;GO:0005634;	-	-	-	-	-	-
BGIBMGA001408	20.9078	11.4186	30.397	2.66206	1.41255	0.0341632	0.127986	scaf7	6516581	6518692	-	2112	-	GO:0003676;GO:0003676;	-	-	-	-	-	101741360
BGIBMGA008054	17.2476	8.64045	25.8548	2.9923	1.58125	0.0342767	0.128283	scaf41	794783	796672	+	771	-	-	-	-	-	-	-	-
BGIBMGA011067	7.79369	2.08482	13.5026	6.47662	2.69524	0.034479	0.128665	scaf31	818061	819500	+	1440	-	GO:0004930;GO:0004930;GO:0004930;GO:0004989;GO:0004989;GO:0007165;GO:0007186;GO:0007186;GO:0007186;GO:0016020;GO:0016021;GO:0016021;GO:0016021;	-	-	-	-	Octopamine receptor [Source:UniProtKB/Swiss-Prot;Acc:Q17232]	-
BGIBMGA000156	7.72516	2.17087	13.2794	6.11711	2.61285	0.0351628	0.130533	scaf43	2517967	2518988	+	300	-	-	-	-	-	-	-	-
BGIBMGA000479	33.221	20.8863	45.5558	2.18113	1.12508	0.0353183	0.130921	scaf8	7908396	7914470	-	393	-	-	-	-	-	-	-	-
BGIBMGA011617	18.2578	9.11863	27.3969	3.0045	1.58712	0.0355806	0.131669	scaf16	5219643	5222592	-	996	-	GO:0005576;GO:0005576;GO:0052689;GO:0052689;	-	-	-	-	-	-
BGIBMGA007915	10.2076	3.34236	17.0729	5.10804	2.35277	0.0355814	0.131669	scaf3	6385907	6397711	+	885	-	GO:0004222;GO:0004222;GO:0004222;GO:0006508;GO:0006508;GO:0006508;GO:0008233;GO:0008237;GO:0008237;GO:0008237;GO:0008270;GO:0008270;GO:0016787;GO:0046872;	-	-	-	-	-	-
BGIBMGA014541	918.257	606.99	1229.52	2.02561	1.01836	0.0360543	0.133035	scaf385	6451	11361	-	936	-	GO:0006812;GO:0006812;GO:0008324;GO:0008324;GO:0016020;GO:0016021;GO:0016021;GO:0098655;	-	-	-	-	-	-
BGIBMGA000818	14.1539	6.46958	21.8382	3.37552	1.75511	0.0365544	0.134279	scaf89	1136767	1137372	+	606	-	GO:0008080;	-	-	-	-	-	101735376
BGIBMGA002053	19.4518	10.3762	28.5275	2.74933	1.45908	0.0372225	0.1359	scaf23	539632	540624	-	993	-	GO:0016020;GO:0016021;GO:0016021;	K15281	-	-	-	-	101740028
BGIBMGA003016	4.62843	0.56423	8.69263	15.4062	3.94544	0.0385086	0.139485	scaf13	3985305	3986621	-	1317	-	GO:0003824;GO:0003824;GO:0008152;	-	-	-	-	-	-
BGIBMGA013159	12.6095	5.38415	19.8349	3.68394	1.88125	0.03859	0.139622	scaf39	3093006	3097187	-	906	-	-	-	-	-	-	-	101741197
BGIBMGA011041	14.7658	7.03381	22.4977	3.19851	1.6774	0.0412607	0.14717	scaf31	1125146	1127144	-	408	-	GO:0016020;GO:0016021;GO:0016021;	-	-	-	-	-	-
BGIBMGA014578	16.1597	8.07622	24.2432	3.0018	1.58583	0.0423358	0.149773	scaf576	18710	19552	-	843	-	GO:0000786;GO:0000786;GO:0003677;GO:0003677;GO:0003677;GO:0005634;GO:0005634;GO:0005634;GO:0005694;GO:0006334;GO:0006334;	K11275	-	-	-	-	101740214
BGIBMGA007714	10.7122	2.60602	18.8184	7.22112	2.85222	0.0448697	0.15652	scaf3	2207950	2213707	-	690	-	-	-	-	-	-	-	-
BGIBMGA005443	4.49949	0.56423	8.43476	14.9491	3.90199	0.0455937	0.158571	scaf19	1617251	1621883	+	1461	-	GO:0008152;GO:0015020;GO:0015020;GO:0016020;GO:0016021;GO:0016021;GO:0016740;GO:0016757;GO:0016758;GO:0016758;	-	-	-	-	-	-
BGIBMGA010965	31.3064	19.8439	42.7689	2.15527	1.10787	0.0463247	0.160678	scaf83	1155784	1161528	-	1638	-	GO:0006024;GO:0006024;GO:0006486;GO:0006486;GO:0015012;GO:0015012;GO:0015020;GO:0015020;GO:0016020;GO:0016021;GO:0016021;GO:0016021;GO:0016757;GO:0016757;	K02367	-	-	-	-	101741346
BGIBMGA000741	10.666	4.42779	16.9043	3.81777	1.93273	0.0473913	0.162934	scaf8	7607647	7608988	+	474	-	-	-	-	-	-	-	-
BGIBMGA000091	26.5789	16.1955	36.9623	2.28226	1.19046	0.0481751	0.164825	scaf43	1198756	1206654	-	1107	-	GO:0003677;GO:0003677;GO:0003677;GO:0005634;GO:0005634;GO:0006355;GO:0006355;GO:0043565;GO:0043565;	K15615	-	-	-	-	101745557
BGIBMGA009811	34.0968	21.9238	46.2697	2.11048	1.07757	0.0483758	0.16538	scaf161	184859	190028	-	447	-	GO:0016567;GO:0061630;GO:0061630;	-	-	-	-	-	-
BGIBMGA013057	29.3215	18.5815	40.0615	2.15599	1.10835	0.0484771	0.165631	scaf4	6770337	6773854	+	813	-	GO:0004252;GO:0004252;GO:0006508;GO:0006508;GO:0006508;GO:0008233;GO:0016020;GO:0016021;GO:0016021;GO:0016021;GO:0016787;	-	-	-	-	-	-
BGIBMGA005440	22.2708	6.90473	37.6368	5.45086	2.44649	0.0488125	0.166188	scaf19	1472765	1477146	+	666	-	-	-	-	-	-	-	-
BGIBMGA009298	4012.57	6524.81	1500.32	0.229941	-2.12066	2.75392e-47	1.7676e-43	scaf38	3612292	3617247	+	1128	-	GO:0016301;GO:0016301;GO:0016301;GO:0016310;GO:0016740;GO:0032958;GO:0032958;	-	-	-	-	-	-
BGIBMGA006787	1317.72	2112.42	523.016	0.24759	-2.01397	4.70396e-36	1.50962e-32	scaf10	6969461	6969836	+	267	-	-	-	-	-	-	-	-
BGIBMGA013148	1238.34	1955.39	521.295	0.266593	-1.90729	2.902e-32	6.20884e-29	scaf124	505718	507272	+	1251	-	GO:0016740;GO:0017183;GO:0017183;GO:0017183;	-	-	-	-	Diphthamide biosynthesis protein 1[Source:UniProtKB/TrEMBL;Acc:H9JUD5]	-
BGIBMGA004178	2077.19	3202.49	951.886	0.297233	-1.75033	1.28352e-30	2.05956e-27	scaf60	565557	573691	+	1155	-	GO:0006869;GO:0006869;	-	-	-	-	Oxysterol-binding protein[Source:UniProtKB/TrEMBL;Acc:H9J3T9]	-
BGIBMGA012465	195.125	347.918	42.3326	0.121674	-3.03891	3.73679e-29	4.79691e-26	scaf56	1387596	1391399	-	3621	-	-	-	-	-	-	-	-
BGIBMGA013173	2098.12	3158.5	1037.75	0.328557	-1.60579	3.70316e-24	3.65672e-21	scaf39	2031002	2050733	-	1209	-	GO:0046983;GO:0046983;	-	-	-	-	-	-
BGIBMGA000073	1694.2	2523.9	864.503	0.342526	-1.54571	9.11117e-24	8.35429e-21	scaf43	2389587	2396756	-	951	-	GO:0003677;GO:0003677;GO:0005634;GO:0005634;	-	-	-	-	-	-
BGIBMGA003681	1938.64	2877.64	999.638	0.347381	-1.52541	1.47937e-23	1.18692e-20	scaf9	4023873	4024349	+	477	-	GO:0005515;	-	-	-	-	-	-
BGIBMGA013492	828.796	1354.3	303.295	0.22395	-2.15875	3.4444e-23	2.45643e-20	scaf101	275853	279751	-	2241	-	GO:0005515;GO:0016020;GO:0016021;GO:0016021;	-	-	-	-	-	101741626
BGIBMGA001790	2420.96	3560.92	1280.99	0.359736	-1.47499	4.15729e-23	2.80879e-20	scaf35	2365630	2371657	+	1086	-	-	K10146	-	-	-	-	101739346
BGIBMGA005612	1074.44	1621.04	527.846	0.325622	-1.61873	6.08022e-23	3.90259e-20	scaf33	838415	849849	+	522	GB	GO:0005344;GO:0005344;GO:0015671;GO:0019825;GO:0019825;GO:0020037;GO:0020037;GO:0046872;GO:0046872;	K21894	-	-	-	Globin [Source:UniProtKB/TrEMBL;Acc:B6ZIV8]"	100216496
BGIBMGA006230	1823.31	2698.7	947.914	0.351248	-1.50944	6.72412e-23	4.11036e-20	scaf5	8596627	8598044	+	1128	-	GO:0003676;GO:0003676;	K05706	-	-	-	-	101744234
BGIBMGA014606	406.301	649.563	163.038	0.250996	-1.99426	1.37771e-22	8.03894e-20	scaf583	84	1171	+	516	-	-	-	-	-	-	-	-
BGIBMGA001732	3026.99	4405.76	1648.22	0.374106	-1.41848	2.26506e-22	1.16306e-19	scaf35	572010	575232	+	645	-	GO:0005740;GO:0005740;GO:0016020;GO:0016021;GO:0016021;GO:0016021;GO:0043065;GO:0043065;	-	-	-	-	-	-
BGIBMGA008658	1174.31	1747.25	601.369	0.34418	-1.53876	1.24673e-21	5.92752e-19	scaf132	591349	596996	+	2358	-	-	-	-	-	-	-	-
BGIBMGA010073	106.971	194.073	19.8696	0.102382	-3.28796	1.13045e-20	4.39744e-18	scaf45	1383931	1384780	+	294	-	-	-	-	-	-	-	-
BGIBMGA009132	58652.5	83019.9	34285.1	0.412975	-1.27588	1.28645e-20	4.71834e-18	scaf96	924094	929331	-	1344	BMTUB2	GO:0000166;GO:0003924;GO:0003924;GO:0003924;GO:0005200;GO:0005200;GO:0005525;GO:0005525;GO:0005525;GO:0005737;GO:0005737;GO:0005856;GO:0005874;GO:0005874;GO:0005874;GO:0007010;GO:0007017;GO:0007017;	K07375	-	-	-	Beta-tubulin [Source:UniProtKB/TrEMBL;Acc:Q8T8B2]"	692511
BGIBMGA010596	2496.25	3583.82	1408.68	0.393067	-1.34715	7.61976e-20	2.64365e-17	scaf145	208327	210768	+	2442	-	GO:0003677;GO:0003677;GO:0005634;GO:0005634;GO:0046872;GO:0046872;	K11446	EC:1.14.11.-	-	-	-	100533205
BGIBMGA007487	1000.57	1582.45	418.689	0.264583	-1.91821	3.59435e-19	1.1831e-16	scaf102	942845	951322	+	900	-	GO:0016020;GO:0016021;GO:0016021;GO:0022857;GO:0022857;GO:0055085;GO:0055085;	-	-	-	-	-	-
BGIBMGA007397	11115.7	17460.8	4770.54	0.273215	-1.87189	2.44701e-18	7.13915e-16	scaf55	780051	781377	+	645	-	GO:0005737;GO:0005737;GO:0009968;GO:0009968;	-	-	-	-	-	-
BGIBMGA007396	500.745	760.278	241.212	0.317268	-1.65622	2.55662e-18	7.29317e-16	scaf55	727600	729293	+	789	-	GO:0003677;GO:0003677;GO:0005634;GO:0005634;GO:0006351;GO:0006351;GO:0006355;GO:0006355;	-	-	-	-	-	101739296
BGIBMGA000146	1017.24	1664.76	369.712	0.222081	-2.17084	7.8858e-18	2.15383e-15	scaf43	2072799	2085395	+	1605	-	GO:0005622;GO:0005622;GO:0035556;GO:0035556;GO:0046872;GO:0046872;	-	-	-	-	-	-
BGIBMGA005266	1783.3	3338.54	228.056	0.0683103	-3.87175	1.93662e-17	5.17926e-15	scaf58	56770	61320	-	819	-	GO:0005506;GO:0005506;GO:0016705;GO:0016705;GO:0020037;GO:0020037;GO:0055114;GO:0055114;	-	-	-	-	-	-
BGIBMGA002433	211.435	341.75	81.1197	0.237366	-2.07482	5.77143e-17	1.512e-14	scaf14	1218057	1224476	-	2007	-	-	-	-	-	-	-	-
BGIBMGA012838	5926.24	9757.22	2095.26	0.21474	-2.21934	7.5591e-17	1.86608e-14	scaf4	4244120	4250275	-	726	-	-	-	-	-	-	-	-
BGIBMGA005418	9402.5	12959.8	5845.23	0.451029	-1.14871	1.17566e-16	2.695e-14	scaf19	840197	847409	+	2034	-	GO:0006629;GO:0016020;GO:0016021;GO:0016021;GO:0016042;GO:0016042;GO:0016787;GO:0016787;	-	-	-	-	-	101743473
BGIBMGA000538	4029.12	6159.4	1898.84	0.308284	-1.69767	2.87426e-16	6.14948e-14	scaf8	4633938	4636953	-	1380	-	GO:0016020;GO:0016021;GO:0016021;GO:0016021;GO:0055085;GO:0055085;	-	-	-	-	-	-
BGIBMGA012082	4576.29	6324.16	2828.42	0.44724	-1.16088	4.36969e-16	9.04737e-14	scaf24	421282	423309	+	1395	-	GO:0005215;GO:0005215;GO:0016020;GO:0016020;GO:0016020;GO:0016021;GO:0016021;GO:0016021;GO:0022857;GO:0022857;GO:0055085;GO:0055085;	-	-	-	-	-	-
BGIBMGA002539	3424.23	4747.15	2101.31	0.442647	-1.17577	5.32464e-16	1.06801e-13	scaf14	5424635	5436986	+	1848	-	GO:0006811;GO:0015078;GO:0015078;GO:0015991;GO:0015991;GO:0016020;GO:0016021;GO:0016021;GO:0033179;GO:0033179;	-	-	-	-	-	-
BGIBMGA003682	3342.09	4891.21	1792.96	0.366569	-1.44784	5.68396e-16	1.12254e-13	scaf9	4061133	4063861	+	747	-	GO:0005515;	-	-	-	-	-	-
BGIBMGA007021	772.268	1115.1	429.44	0.385115	-1.37664	9.0765e-16	1.68862e-13	scaf21	2208669	2211985	-	768	-	GO:0003924;GO:0003924;GO:0005525;GO:0005525;	-	-	-	-	-	-
BGIBMGA007724	478.48	732.046	224.913	0.307238	-1.70257	2.31482e-15	4.12713e-13	scaf3	1599886	1605672	-	1737	-	GO:0005315;GO:0005315;GO:0006817;GO:0006817;GO:0006817;GO:0016020;GO:0016020;GO:0016020;GO:0016021;GO:0016021;GO:0055085;	-	-	-	-	-	-
BGIBMGA007573	916.426	1304.67	528.178	0.404836	-1.30459	4.92758e-15	8.54802e-13	scaf66	909979	923292	+	2559	-	GO:0004649;GO:0004649;GO:0005975;GO:0005975;	-	-	-	-	-	-
BGIBMGA004656	2631.84	3624.41	1639.28	0.45229	-1.14468	6.08614e-15	1.028e-12	scaf135	423076	432375	-	2805	-	GO:0000166;GO:0003774;GO:0003774;GO:0003774;GO:0003777;GO:0003779;GO:0003779;GO:0005524;GO:0005524;GO:0005524;GO:0007018;GO:0008017;GO:0016459;GO:0016459;GO:0016459;	-	-	-	-	-	-
BGIBMGA004813	243.719	413.756	73.6817	0.17808	-2.4894	7.95193e-15	1.27599e-12	scaf46	1272178	1274713	-	162	-	-	-	-	-	-	-	-
BGIBMGA002432	1345.36	1956.7	734.019	0.375131	-1.41453	9.24514e-15	1.46518e-12	scaf14	1291644	1312807	-	2511	-	GO:0000220;GO:0000220;GO:0006811;GO:0015078;GO:0015078;GO:0015991;GO:0015991;GO:0016020;GO:0016021;GO:0016021;GO:0033179;GO:0033179;	-	-	-	-	-	-
BGIBMGA003676	785.62	1121.61	449.632	0.400881	-1.31875	9.40877e-15	1.47293e-12	scaf9	3837943	3853447	+	2259	-	GO:0016020;GO:0016021;GO:0016021;	-	-	-	-	-	101737216
BGIBMGA005066	1381.21	1925.37	837.051	0.434747	-1.20175	1.42698e-14	2.18073e-12	scaf32	2150770	2172537	-	2220	-	-	-	-	-	-	-	-
BGIBMGA007911	384.348	585.039	183.656	0.313921	-1.67153	4.05103e-14	5.90943e-12	scaf3	6253212	6268517	+	3018	-	GO:0045216;GO:0045216;	-	-	-	-	-	-
BGIBMGA001399	3257.87	4468.13	2047.61	0.458271	-1.12573	4.45408e-14	6.353e-12	scaf7	6827311	6837724	-	1011	-	GO:0005975;GO:0005975;GO:0005975;GO:0016311;GO:0016787;GO:0016791;GO:0016791;GO:0042132;GO:0042132;GO:0042578;GO:0042578;	K03841	EC:3.1.3.11	-	-	Fructose-1,6-bisphosphatase[Source:UniProtKB/TrEMBL;Acc:Q1HQ57]	732915
BGIBMGA003334	2440.89	3334.65	1547.13	0.463955	-1.10794	4.65966e-14	6.57319e-12	scaf42	1598149	1599909	-	1761	-	GO:0000981;GO:0000981;GO:0003676;GO:0003676;GO:0006357;GO:0006357;GO:0040034;GO:0040034;	-	-	-	-	-	-
BGIBMGA012742	370.064	549.46	190.668	0.347009	-1.52695	6.31052e-14	8.80523e-12	scaf93	461331	467107	+	534	-	GO:0005102;GO:0007399;	-	-	-	-	-	-
BGIBMGA002611	6615.68	10189.7	3041.61	0.298497	-1.74421	6.96634e-14	9.6158e-12	scaf20	2291042	2302639	-	2580	-	GO:0005515;GO:0010468;GO:0010468;GO:0046872;GO:0046872;GO:0071557;GO:0071557;GO:0071558;GO:0071558;	-	-	-	-	-	-
BGIBMGA005120	1052.03	1468.68	635.375	0.432617	-1.20884	8.02573e-14	1.09602e-11	scaf32	1497227	1516204	+	1371	-	GO:0046872;GO:0046872;	-	-	-	-	-	-
BGIBMGA013535	671.8	991.853	351.747	0.354636	-1.49559	1.43537e-13	1.86119e-11	scaf101	937233	951658	+	1758	-	-	-	-	-	-	-	-
BGIBMGA006335	36029.4	48050.5	24008.3	0.499647	-1.00102	1.51945e-13	1.95051e-11	scaf49	2275116	2276597	+	1482	-	-	-	-	-	-	-	101743105
BGIBMGA011477	418.861	610.966	226.757	0.371146	-1.42994	3.50087e-13	4.123e-11	scaf22	1335961	1350007	-	1362	-	GO:0000166;GO:0001678;GO:0001678;GO:0004396;GO:0004396;GO:0004396;GO:0005524;GO:0005524;GO:0005524;GO:0005536;GO:0005536;GO:0005623;GO:0005623;GO:0005975;GO:0005975;GO:0006096;GO:0006096;GO:0006096;GO:0016301;GO:0016310;GO:0016740;GO:0016773;GO:0016773;GO:0046835;	K00844	EC:2.7.1.1	-	-	-	101745054
BGIBMGA001896	1714.28	2340.36	1088.2	0.464972	-1.10479	4.37051e-13	5.07671e-11	scaf28	1356902	1383224	-	4161	-	GO:0016020;GO:0016021;GO:0016021;	-	-	-	-	-	-
BGIBMGA011105	220.133	339.043	101.222	0.298553	-1.74394	4.38977e-13	5.07671e-11	scaf95	1192665	1194568	-	732	-	GO:0003677;GO:0003677;GO:0005634;GO:0005634;GO:0006351;GO:0006351;GO:0006355;GO:0006355;	-	-	-	-	-	-
BGIBMGA002586	818.275	1192.61	443.939	0.372242	-1.42569	5.33273e-13	6.00913e-11	scaf20	4214999	4227566	-	2544	-	GO:0016020;GO:0016021;GO:0016021;	-	-	-	-	-	101742662
BGIBMGA013539	65.2315	116.792	13.6712	0.117056	-3.09473	5.38326e-13	6.00913e-11	scaf101	1210436	1212800	+	411	-	GO:0046983;GO:0046983;	K09091	-	-	-	-	105841640
BGIBMGA006324	442.446	639.455	245.437	0.383822	-1.38149	6.80218e-13	7.46322e-11	scaf49	1761614	1766927	+	720	-	GO:0004252;GO:0004252;GO:0006508;GO:0006508;	-	-	-	-	-	-
BGIBMGA010306	529.119	754.617	303.622	0.402353	-1.31347	7.82402e-13	8.44008e-11	scaf127	110679	115196	+	1188	-	GO:0004252;GO:0004252;GO:0006508;GO:0006508;GO:0006508;GO:0008233;GO:0008236;GO:0016787;	-	-	-	-	-	-
BGIBMGA006238	307.928	458.536	157.32	0.343093	-1.54333	8.97387e-13	9.59979e-11	scaf88	702225	705323	-	423	-	-	-	-	-	-	-	101739535
BGIBMGA012467	316.776	469.176	164.377	0.350352	-1.51312	1.10195e-12	1.15948e-10	scaf56	1295846	1309166	-	2337	-	GO:0005515;GO:0007015;GO:0007015;GO:0007155;GO:0007155;	-	-	-	-	-	-
BGIBMGA010338	2353.28	3167.47	1539.1	0.485907	-1.04125	1.14872e-12	1.19887e-10	scaf109	339058	376457	+	2706	-	GO:0016491;GO:0016491;GO:0055114;GO:0055114;	-	-	-	-	-	-
BGIBMGA003728	196.782	304.749	88.8156	0.291438	-1.77874	1.17094e-12	1.21221e-10	scaf9	6525025	6530932	+	486	-	-	-	-	-	-	-	101736330
BGIBMGA012794	847.926	1180.12	515.732	0.437016	-1.19424	1.26798e-12	1.29183e-10	scaf4	7268799	7282921	-	1638	-	GO:0003677;GO:0003677;GO:0005634;GO:0005634;	-	-	-	-	-	-
BGIBMGA006552	3695.5	4947.16	2443.84	0.493988	-1.01745	1.30464e-12	1.31872e-10	scaf10	6716922	6727114	-	2055	-	GO:0004672;GO:0004672;GO:0005524;GO:0005524;GO:0006468;GO:0006468;	-	-	-	-	-	-
BGIBMGA001237	355.636	521.745	189.527	0.363256	-1.46094	1.38386e-12	1.38786e-10	scaf1	10811745	10821188	+	1281	-	GO:0003824;GO:0003824;GO:0004084;GO:0004084;GO:0004084;GO:0008483;GO:0008652;GO:0009081;GO:0009081;GO:0009082;GO:0009082;GO:0016740;GO:0052654;GO:0052654;GO:0052655;GO:0052655;GO:0052656;GO:0052656;	K00826	EC:2.6.1.42	-	-	Branched-chain-amino-acid aminotransferase[Source:UniProtKB/TrEMBL;Acc:H9IVF7]	101736408
BGIBMGA002660	2136.7	2880.58	1392.81	0.483519	-1.04835	1.61509e-12	1.55887e-10	scaf20	451872	460152	+	1572	-	GO:0004553;GO:0004553;GO:0005975;GO:0005975;	-	-	-	-	-	-
BGIBMGA008948	724.73	1015.65	433.809	0.427124	-1.22727	1.6739e-12	1.60358e-10	scaf17	875239	881981	+	1488	-	GO:0003676;GO:0003676;GO:0005634;GO:0005634;GO:0008270;GO:0008270;	-	-	-	-	-	-
BGIBMGA005233	617.412	936.318	298.505	0.318807	-1.64924	2.17026e-12	2.00429e-10	scaf110	319972	320805	+	699	-	-	-	-	-	-	-	-
BGIBMGA007565	6344.22	9042.29	3646.16	0.403234	-1.31031	2.27309e-12	2.08426e-10	scaf66	580477	586147	+	705	-	-	-	-	-	-	-	-
BGIBMGA013053	2516.34	3373.85	1658.83	0.491674	-1.02423	2.42544e-12	2.1773e-10	scaf4	6457326	6460214	+	2889	-	GO:0003676;GO:0003676;	-	-	-	-	-	-
BGIBMGA007729	608.194	857.03	359.359	0.419307	-1.25392	3.30971e-12	2.89026e-10	scaf3	1284537	1290944	-	1242	-	GO:0005615;GO:0005615;	-	-	-	-	-	100126553
BGIBMGA004699	1157.74	1683.09	632.391	0.375731	-1.41223	3.83031e-12	3.27798e-10	scaf108	12737	28484	+	1575	-	GO:0005515;	-	-	-	-	-	-
BGIBMGA008978	67.1042	118.355	15.853	0.133944	-2.90029	3.91014e-12	3.32414e-10	scaf17	2264842	2267542	+	1119	-	GO:0005576;GO:0005576;GO:0005737;GO:0005737;	-	-	-	-	Putative neuropeptide precursor protein[Source:UniProtKB/Swiss-Prot;Acc:B9WZ56]	100301494
BGIBMGA003935	1075.01	1470.32	679.696	0.462277	-1.11317	4.24929e-12	3.58869e-10	scaf105	979261	995843	-	1662	-	GO:0008271;GO:0008271;GO:0008271;GO:0008272;GO:0008272;GO:0015116;GO:0015116;GO:0016020;GO:0016020;GO:0016020;GO:0016021;GO:0016021;GO:0016021;GO:0055085;GO:0055085;GO:1902358;	-	-	-	-	-	-
BGIBMGA006136	782.075	1084.75	479.404	0.44195	-1.17804	4.27906e-12	3.59021e-10	scaf5	3641106	3647485	+	699	-	GO:0004672;GO:0004672;GO:0005524;GO:0005524;GO:0006468;GO:0006468;	-	-	-	-	-	-
BGIBMGA002435	640.441	940.402	340.481	0.362059	-1.4657	4.39198e-12	3.66103e-10	scaf14	1178019	1195310	-	1467	-	-	-	-	-	-	-	-
BGIBMGA012074	551.502	842.632	260.373	0.308999	-1.69432	4.88535e-12	4.04601e-10	scaf24	297792	299098	-	1056	-	-	-	-	-	-	-	101738147
BGIBMGA013161	1464.33	1980.02	948.628	0.479099	-1.0616	6.4452e-12	5.30365e-10	scaf39	3034644	3036845	-	645	-	GO:0016491;GO:0016491;GO:0055114;	-	-	-	-	-	-
BGIBMGA002877	543.512	768.144	318.881	0.415131	-1.26836	6.52235e-12	5.33295e-10	scaf30	1284023	1287751	+	837	-	-	-	-	-	-	-	-
BGIBMGA002538	877.527	1208.28	546.778	0.452528	-1.14392	7.02769e-12	5.70977e-10	scaf14	5400662	5405806	+	501	-	GO:0006811;GO:0015078;GO:0015078;GO:0015991;GO:0015991;GO:0033179;GO:0033179;	-	-	-	-	-	-
BGIBMGA004745	573.717	806.66	340.773	0.42245	-1.24315	8.28422e-12	6.64654e-10	scaf57	1512237	1521808	-	612	-	GO:0005758;GO:0005758;	-	-	-	-	-	101740359
BGIBMGA011852	353.842	525.332	182.352	0.347117	-1.5265	8.7104e-12	6.90219e-10	scaf16	4257969	4259852	+	624	-	-	-	-	-	-	-	-
BGIBMGA008915	637.567	1072.52	202.613	0.188913	-2.40421	9.16903e-12	7.177e-10	scaf17	1480331	1481056	-	726	-	GO:0003677;GO:0003677;GO:0005634;GO:0005634;GO:0006351;GO:0006351;GO:0006355;GO:0006355;GO:0006355;GO:0046983;GO:0046983;	-	-	-	-	-	-
BGIBMGA004061	621.895	868.429	375.36	0.432229	-1.21013	1.10615e-11	8.43755e-10	scaf36	140513	151613	+	5175	-	-	-	-	-	-	-	-
BGIBMGA006426	22793.7	30812.9	14774.5	0.47949	-1.06043	1.40302e-11	1.05944e-09	scaf11	895454	897614	-	1047	-	GO:0005515;	-	-	-	-	-	-
BGIBMGA002197	2178.1	3144.75	1211.46	0.385233	-1.3762	1.73004e-11	1.29874e-09	scaf64	2183886	2194054	+	3735	-	GO:0000166;GO:0004383;GO:0004383;GO:0004383;GO:0004672;GO:0004672;GO:0005524;GO:0005524;GO:0005622;GO:0005622;GO:0006182;GO:0006182;GO:0006182;GO:0006468;GO:0006468;GO:0009190;GO:0009190;GO:0016020;GO:0016021;GO:0016021;GO:0016829;GO:0016849;GO:0016849;GO:0035556;GO:0035556;	K12322	EC:4.6.1.2	-	-	Guanylate cyclase[Source:UniProtKB/TrEMBL;Acc:H9IY64]	101740270
BGIBMGA012795	1462.76	2044.49	881.021	0.430924	-1.21449	1.80573e-11	1.33989e-09	scaf4	7229541	7239308	-	2055	-	-	-	-	-	-	-	-
BGIBMGA007188	537.044	753.502	320.586	0.425462	-1.2329	2.10419e-11	1.54351e-09	scaf74	167115	171714	+	909	-	GO:0003676;GO:0003676;GO:0005634;GO:0005634;GO:0008270;GO:0008270;	-	-	-	-	-	-
BGIBMGA005211	1253.28	2093.21	413.354	0.197474	-2.34027	2.75641e-11	1.97676e-09	scaf119	530161	531578	+	1254	-	-	-	-	-	-	-	-
BGIBMGA004655	1123.75	1523.2	724.306	0.475514	-1.07244	2.80969e-11	2.00377e-09	scaf135	486724	506352	-	6390	-	GO:0003824;GO:0003824;GO:0009058;GO:0009058;GO:0016491;GO:0016491;GO:0016740;GO:0016740;GO:0016788;GO:0016788;GO:0055114;	-	-	-	-	-	-
BGIBMGA002156	4161.97	5834.8	2489.14	0.426603	-1.22903	4.0352e-11	2.81521e-09	scaf64	2125315	2127939	-	909	-	GO:0003700;GO:0003700;GO:0006355;GO:0006355;GO:0008270;GO:0008270;GO:0043565;GO:0043565;GO:0046872;	-	-	-	-	-	-
BGIBMGA006799	37.3756	70.209	4.54219	0.0646952	-3.9502	4.34342e-11	2.99766e-09	scaf70	1905474	1945501	-	3333	-	GO:0000166;GO:0004383;GO:0004383;GO:0004672;GO:0004672;GO:0005524;GO:0005524;GO:0005622;GO:0005622;GO:0006182;GO:0006468;GO:0006468;GO:0009190;GO:0009190;GO:0016020;GO:0016021;GO:0016021;GO:0016829;GO:0016849;GO:0016849;GO:0035556;GO:0035556;	-	-	-	-	-	-
BGIBMGA006607	1515.3	2027.79	1002.81	0.494534	-1.01586	4.83409e-11	3.31579e-09	scaf10	4216122	4223648	-	1827	-	-	-	-	-	-	-	101735341
BGIBMGA011853	321.007	464.313	177.701	0.382718	-1.38565	4.85603e-11	3.31579e-09	scaf16	4262532	4268351	+	363	-	GO:0016020;GO:0016021;GO:0016021;	-	-	-	-	-	-
BGIBMGA014224	84.8795	142.149	27.6101	0.194234	-2.36413	5.40868e-11	3.63514e-09	scaf80	1524763	1528391	-	1323	-	-	-	-	-	-	Yellow-f [Source:UniProtKB/TrEMBL;Acc:H9JXF8]"	101736658
BGIBMGA007564	4635.88	7487.45	1784.32	0.238308	-2.0691	5.91446e-11	3.95437e-09	scaf66	535288	569257	+	2571	-	-	-	-	-	-	-	-
BGIBMGA013669	872.376	1186.78	557.975	0.47016	-1.08878	6.49214e-11	4.29585e-09	scaf126	219839	226416	-	1440	-	GO:0005856;GO:0005856;	-	-	-	-	-	-
BGIBMGA001988	1555.6	2102.45	1008.76	0.479801	-1.05949	6.5772e-11	4.32982e-09	scaf28	4630208	4678473	+	4155	-	GO:0005216;GO:0005216;GO:0006811;GO:0006811;GO:0016020;GO:0016020;GO:0016020;GO:0016021;GO:0016021;GO:0034220;GO:0051262;GO:0051262;GO:0055085;GO:0055085;	-	-	-	-	-	-
BGIBMGA004346	321.529	463.701	179.357	0.386795	-1.37036	8.26862e-11	5.33388e-09	scaf263	49816	50867	-	456	-	-	-	-	-	-	-	-
BGIBMGA003999	898.579	1215.76	581.395	0.478213	-1.06427	9.37262e-11	6.01582e-09	scaf36	2975117	2986372	-	2028	-	GO:0003676;GO:0003676;	-	-	-	-	-	-
BGIBMGA011691	1252.27	1673.35	831.201	0.496729	-1.00947	1.49435e-10	9.31213e-09	scaf16	1365818	1373814	-	2826	-	GO:0004970;GO:0004970;GO:0005216;GO:0005216;GO:0005234;GO:0005886;GO:0006811;GO:0006811;GO:0006811;GO:0016020;GO:0016020;GO:0016020;GO:0016021;GO:0016021;GO:0030054;GO:0030054;GO:0034220;GO:0035235;GO:0038023;GO:0038023;GO:0045202;GO:0045211;GO:0045211;	-	-	-	-	-	-
BGIBMGA007467	366.837	518.972	214.702	0.413707	-1.27332	2.04033e-10	1.24132e-08	scaf102	220856	221782	-	678	-	GO:0016533;GO:0016533;GO:0016534;GO:0016534;GO:0071902;	-	-	-	-	-	-
BGIBMGA013483	219.803	325.64	113.966	0.349976	-1.51467	2.10886e-10	1.27696e-08	scaf101	970192	973388	-	564	-	GO:0004601;GO:0004601;GO:0006979;GO:0006979;GO:0020037;GO:0020037;GO:0055114;GO:0055114;GO:0098869;	-	-	-	-	-	-
BGIBMGA013562	381.946	540.288	223.604	0.41386	-1.27279	2.19524e-10	1.32302e-08	scaf130	171712	176889	+	1014	-	-	-	-	-	-	-	-
BGIBMGA001435	1094	1465.59	722.416	0.492918	-1.02058	2.26742e-10	1.35381e-08	scaf7	4169229	4177581	-	1431	-	-	-	-	-	-	-	-
BGIBMGA005036	1253.58	1671.59	835.574	0.499868	-1.00038	2.33642e-10	1.38855e-08	scaf32	3038758	3044862	-	657	-	GO:0008152;GO:0016787;GO:0016787;	-	-	-	-	-	-
BGIBMGA010177	474.834	661.546	288.121	0.435527	-1.19916	2.49619e-10	1.46383e-08	scaf15	953725	959295	-	1218	-	GO:0016020;GO:0016021;GO:0016021;GO:0016021;	-	-	-	-	-	-
BGIBMGA012725	954.259	1284.02	624.496	0.48636	-1.0399	2.52232e-10	1.47178e-08	scaf93	1312576	1332790	-	3186	-	GO:0005515;	-	-	-	-	-	-
BGIBMGA009425	1929	2643.47	1214.52	0.459441	-1.12205	2.64737e-10	1.53775e-08	scaf81	1528164	1530701	+	2538	-	GO:0005515;GO:0005622;GO:0005622;GO:0008270;GO:0008270;GO:0046872;	K11997	-	-	-	-	101743927
BGIBMGA002942	99.5361	161.649	37.4235	0.231512	-2.11084	2.78547e-10	1.61068e-08	scaf30	4393941	4396063	+	813	-	-	-	-	-	-	-	-
BGIBMGA004378	788.697	1170.72	406.67	0.347366	-1.52547	2.83516e-10	1.63206e-08	scaf37	2840432	2847390	-	1038	-	-	-	-	-	-	-	101739669
BGIBMGA009278	932.764	1256.23	609.298	0.485021	-1.04388	3.03249e-10	1.73014e-08	scaf38	1815365	1815565	+	201	-	-	-	-	-	-	-	-
BGIBMGA007563	822.492	1428.55	216.438	0.15151	-2.72252	4.25658e-10	2.31532e-08	scaf66	520744	521298	+	555	-	-	-	-	-	-	-	-
BGIBMGA003093	254.093	369.569	138.616	0.375075	-1.41475	6.91573e-10	3.63841e-08	scaf13	1500441	1508008	+	1137	-	GO:0003779;GO:0003779;GO:0016192;GO:0016192;GO:0045010;GO:0045010;GO:0046872;GO:0046872;	-	-	-	-	-	-
BGIBMGA009839	795.274	1166.73	423.822	0.363257	-1.46094	8.11841e-10	4.18538e-08	scaf51	2010356	2022518	-	1452	-	-	-	-	-	-	-	-
BGIBMGA008362	73.1253	122.31	23.9407	0.195738	-2.35301	8.51829e-10	4.35655e-08	scaf2	3738261	3740810	-	699	-	GO:0016020;GO:0016021;GO:0016021;	-	-	-	-	-	-
BGIBMGA003802	95.155	153.615	36.6945	0.238873	-2.06569	8.65672e-10	4.39859e-08	scaf91	1550600	1553371	+	2679	-	GO:0004383;GO:0004383;GO:0004672;GO:0004672;GO:0004713;GO:0004713;GO:0005524;GO:0005524;GO:0006182;GO:0006468;GO:0006468;GO:0018108;	-	-	-	-	-	-
BGIBMGA012693	423.376	592.638	254.115	0.428786	-1.22167	8.66902e-10	4.39859e-08	scaf69	455101	457928	+	1971	-	GO:0006357;	-	-	-	-	-	-
BGIBMGA010248	506.864	693.435	320.293	0.461894	-1.11437	1.57121e-09	7.75756e-08	scaf15	3317140	3327852	+	933	-	GO:0016020;GO:0016021;GO:0016021;GO:0022857;GO:0022857;GO:0055085;GO:0055085;	-	-	-	-	-	-
BGIBMGA003800	433.328	599.767	266.888	0.444986	-1.16817	1.63602e-09	8.01589e-08	scaf91	1513613	1528201	+	1863	-	GO:0004383;GO:0004383;GO:0004672;GO:0004672;GO:0004713;GO:0004713;GO:0005524;GO:0005524;GO:0006182;GO:0006468;GO:0006468;GO:0016020;GO:0016021;GO:0016021;GO:0018108;	-	-	-	-	-	-
BGIBMGA008421	1169.09	1753.99	584.191	0.333065	-1.58613	1.85682e-09	8.96091e-08	scaf2	736972	768509	+	3645	-	GO:0005506;GO:0005506;GO:0016491;GO:0016491;GO:0016614;GO:0046872;GO:0046872;GO:0046872;GO:0050660;GO:0050660;GO:0051536;GO:0051537;GO:0051537;GO:0055114;GO:0055114;GO:0071949;GO:0071949;	-	-	-	-	-	-
BGIBMGA012070	440.358	605.343	275.372	0.454903	-1.13637	2.15574e-09	1.02115e-07	scaf24	681990	690584	-	603	-	GO:0005515;GO:0005634;GO:0005634;GO:0006511;GO:0006511;GO:0007275;GO:0007275;GO:0008270;GO:0008270;GO:0046872;	-	-	-	-	-	-
BGIBMGA012314	221.767	323.201	120.333	0.372317	-1.4254	2.24821e-09	1.05715e-07	scaf26	621386	623193	+	1200	-	GO:0003676;GO:0003676;	-	-	-	-	-	101744006
BGIBMGA013115	309.794	437.87	181.717	0.415002	-1.26881	2.28032e-09	1.06834e-07	scaf124	494923	509060	-	2082	PRO-PO2	GO:0004497;GO:0004503;GO:0004503;GO:0005576;GO:0005576;GO:0006583;GO:0006583;GO:0006952;GO:0006952;GO:0016491;GO:0016491;GO:0016491;GO:0042438;GO:0046872;GO:0046872;GO:0055114;	-	-	-	-	Phenoloxidase subunit 2 [Source:UniProtKB/Swiss-Prot;Acc:Q27452]	693073
BGIBMGA010313	237.995	344.336	131.654	0.382342	-1.38707	2.54762e-09	1.18492e-07	scaf127	475001	480032	+	570	-	-	-	-	-	-	-	-
BGIBMGA001807	109.34	171.671	47.0086	0.27383	-1.86865	2.90413e-09	1.33621e-07	scaf35	3057554	3065764	+	1242	-	GO:0004222;GO:0004222;GO:0006508;GO:0006508;GO:0008237;GO:0008237;	-	-	-	-	-	-
BGIBMGA003020	2014.53	2703.56	1325.5	0.490279	-1.02832	2.93748e-09	1.34673e-07	scaf13	3883661	3892685	-	1509	-	GO:0003676;GO:0003676;GO:0003723;GO:0003723;GO:0008190;GO:0045727;	-	-	-	-	-	-
BGIBMGA005980	5221.48	7991.95	2451	0.306684	-1.70518	3.00148e-09	1.37117e-07	scaf5	5763566	5772183	-	5085	-	GO:0003676;GO:0003676;	-	-	-	-	-	-
BGIBMGA004418	126.014	194.556	57.4716	0.295399	-1.75926	3.88709e-09	1.7447e-07	scaf37	747756	748316	-	561	-	-	-	-	-	-	-	-
BGIBMGA009592	142.011	217.838	66.184	0.303822	-1.7187	5.00212e-09	2.22188e-07	scaf103	342124	345626	-	336	-	-	-	-	-	-	-	101745081
BGIBMGA003739	699.709	936.228	463.189	0.49474	-1.01526	5.12508e-09	2.26864e-07	scaf9	6991490	6997726	+	1776	-	GO:0005215;GO:0005215;GO:0016020;GO:0016020;GO:0016020;GO:0016021;GO:0016021;GO:0016021;GO:0022857;GO:0022857;GO:0055085;GO:0055085;	-	-	-	-	-	-
BGIBMGA010375	100.709	158.827	42.5904	0.268155	-1.89886	5.64335e-09	2.47248e-07	scaf6	7380581	7380820	-	240	-	-	-	-	-	-	-	-
BGIBMGA010256	331.211	471.719	190.702	0.404271	-1.3066	6.70001e-09	2.88617e-07	scaf15	3648176	3662611	+	1770	-	-	-	-	-	-	-	-
BGIBMGA011701	351.25	487.747	214.752	0.440294	-1.18346	6.88403e-09	2.94568e-07	scaf16	1179108	1186424	-	363	-	GO:0016020;GO:0016021;GO:0016021;	-	-	-	-	-	-
BGIBMGA007369	38.9873	70.3332	7.6414	0.108646	-3.2023	7.0351e-09	3.00032e-07	scaf55	742868	745353	-	618	-	GO:0003677;GO:0003677;GO:0005634;GO:0005634;GO:0006351;GO:0006351;GO:0006355;GO:0006355;	-	-	-	-	-	-
BGIBMGA006214	415.166	567.664	262.668	0.462718	-1.11179	9.18665e-09	3.80416e-07	scaf5	8132104	8137598	+	1731	-	GO:0003824;GO:0003824;GO:0005515;GO:0005576;GO:0005576;GO:0005975;GO:0005975;GO:0006030;GO:0006030;GO:0008061;GO:0008061;	-	-	-	-	-	-
BGIBMGA006913	397.215	607.824	186.607	0.307008	-1.70365	9.97187e-09	4.07672e-07	scaf44	742527	750190	-	1752	-	GO:0005515;	-	-	-	-	-	-
BGIBMGA005183	511.858	691.283	332.432	0.480892	-1.05622	1.15888e-08	4.63442e-07	scaf119	638777	642076	-	1440	-	-	-	-	-	-	-	-
BGIBMGA010699	214.689	308.742	120.636	0.390734	-1.35574	1.84024e-08	7.00975e-07	scaf148	237276	245496	+	774	-	GO:0016020;GO:0016020;GO:0016020;GO:0016021;GO:0016021;	K14343	-	-	-	-	101736141
BGIBMGA003998	385.871	528.09	243.652	0.461383	-1.11596	2.06722e-08	7.72418e-07	scaf36	3069071	3070360	-	993	-	-	-	-	-	-	-	-
BGIBMGA003202	1981.48	2982.6	980.374	0.328698	-1.60516	2.139e-08	7.93595e-07	scaf13	5893416	5895464	+	1278	-	GO:0032559;GO:0032559;GO:0071900;GO:0071900;	-	-	-	-	-	-
BGIBMGA011320	77.1762	124.739	29.6135	0.237404	-2.07459	2.22037e-08	8.19048e-07	scaf12	1517283	1522090	+	1515	-	GO:0005515;GO:0016020;GO:0016021;GO:0016021;	-	-	-	-	-	101746016
BGIBMGA009074	100.771	157.34	44.202	0.280933	-1.8317	2.33898e-08	8.5058e-07	scaf63	721220	722636	-	621	-	GO:0003677;GO:0003677;GO:0005634;GO:0005634;	-	-	-	-	-	-
BGIBMGA013563	926.949	1364.44	489.46	0.358727	-1.47904	2.44253e-08	8.83234e-07	scaf130	187154	201497	+	1896	-	GO:0005515;	-	-	-	-	-	-
BGIBMGA008965	6213.34	8491.92	3934.77	0.463355	-1.10981	2.48014e-08	8.90069e-07	scaf17	1683923	1684528	+	606	E(SPL)MBETA	GO:0003677;GO:0003677;GO:0005634;GO:0005634;GO:0006351;GO:0006351;GO:0006355;GO:0006355;GO:0006355;GO:0046983;GO:0046983;	K09090	-	-	-	E(Spl)-like protein[Source:UniProtKB/TrEMBL;Acc:D2KP15]	100302604
BGIBMGA008110	96.7538	151.22	42.2879	0.279646	-1.83833	2.937e-08	1.03294e-06	scaf87	904444	912213	+	1551	-	-	-	-	-	-	-	101735869
BGIBMGA010342	308.445	427.709	189.18	0.44231	-1.17687	3.04057e-08	1.06644e-06	scaf109	478736	480596	+	312	-	-	-	-	-	-	-	-
BGIBMGA005212	1497.2	2468.61	525.803	0.212996	-2.2311	3.4634e-08	1.20161e-06	scaf119	549276	550566	+	1110	-	-	-	-	-	-	-	-
BGIBMGA013849	622.128	879.536	364.719	0.414672	-1.26996	4.36547e-08	1.47862e-06	scaf62	156885	157913	+	1029	-	GO:0005615;GO:0005615;	-	-	-	-	-	-
BGIBMGA006456	388.888	528.353	249.424	0.472077	-1.08291	4.55489e-08	1.53872e-06	scaf11	907751	918874	+	2100	-	-	-	-	-	-	-	-
BGIBMGA003002	142.321	211.655	72.9874	0.344842	-1.53599	5.00998e-08	1.67482e-06	scaf13	4358011	4375650	-	6054	-	GO:0004842;GO:0004842;GO:0016567;GO:0046872;GO:0046872;GO:0071797;GO:0071797;	-	-	-	-	-	-
BGIBMGA003626	326.261	468.028	184.494	0.394195	-1.34302	5.70293e-08	1.88682e-06	scaf9	1292204	1298468	+	1698	-	GO:0005929;GO:0005929;GO:0030992;GO:0030992;GO:0042073;GO:0042073;GO:0048487;GO:0048487;GO:0060271;GO:0060271;	K19679	-	-	-	-	101744094
BGIBMGA000591	81.1171	128.693	33.5408	0.260626	-1.93995	7.43931e-08	2.37558e-06	scaf8	878398	883160	-	3246	-	GO:0005515;	-	-	-	-	-	-
BGIBMGA005852	747.389	1048.16	446.622	0.426102	-1.23073	7.98854e-08	2.50731e-06	scaf125	47362	49893	-	534	-	GO:0005737;GO:0005737;GO:0042325;GO:0042325;	-	-	-	-	-	-
BGIBMGA011679	66.6131	108.323	24.9027	0.229892	-2.12097	8.04182e-08	2.51175e-06	scaf16	1730307	1730833	-	438	-	-	-	-	-	-	-	-
BGIBMGA004541	361.09	490.578	231.602	0.4721	-1.08284	8.49528e-08	2.64053e-06	scaf48	2701904	2702449	-	546	HSP20.4	GO:0046872;	K09542	-	-	-	Heat shock protein hsp20.4[Source:UniProtKB/TrEMBL;Acc:Q9GSB6]	692591
BGIBMGA002944	256.287	357.361	155.213	0.43433	-1.20314	8.87427e-08	2.73844e-06	scaf30	4402221	4406889	+	813	-	GO:0016491;GO:0016491;GO:0055114;	-	-	-	-	-	-
BGIBMGA001958	140.369	207.705	73.032	0.351614	-1.50794	9.55366e-08	2.93398e-06	scaf28	2976517	2977584	+	873	CPG31	-	-	-	-	-	Putative cuticle protein CPG31[Source:UniProtKB/TrEMBL;Acc:D0VEM6]	101738773
BGIBMGA007046	282.946	460.683	105.209	0.228377	-2.13051	1.03711e-07	3.15484e-06	scaf21	538858	543585	-	1380	-	GO:0004252;GO:0004252;GO:0006508;GO:0006508;GO:0006508;GO:0008233;GO:0008236;GO:0016787;	-	-	-	-	-	-
BGIBMGA005790	202.393	330.479	74.3064	0.224845	-2.153	1.0651e-07	3.23232e-06	scaf54	183692	185928	+	321	-	GO:0016020;GO:0016021;GO:0016021;	-	-	-	-	-	-
BGIBMGA003091	106.785	162.734	50.8368	0.312392	-1.67857	1.17356e-07	3.51986e-06	scaf13	1448495	1452692	+	618	-	GO:0003779;GO:0003779;GO:0016192;GO:0016192;GO:0045010;GO:0045010;	-	-	-	-	-	-
BGIBMGA011789	151.371	265.353	37.3888	0.140902	-2.82723	1.19024e-07	3.55327e-06	scaf16	1484611	1486512	+	1362	-	GO:0006508;GO:0006508;GO:0006508;GO:0008233;GO:0008237;GO:0008237;GO:0016020;GO:0016021;GO:0016021;GO:0016787;GO:0016805;GO:0016805;GO:0016805;GO:0031225;GO:0031225;GO:0046872;GO:0046872;	-	-	-	-	-	-
BGIBMGA005121	202.222	299.527	104.917	0.350274	-1.51344	1.36443e-07	3.98979e-06	scaf32	1517897	1528639	+	675	-	GO:0016491;GO:0016491;GO:0055114;GO:0055114;	-	-	-	-	-	-
BGIBMGA013431	127.167	189.559	64.7758	0.341718	-1.54912	1.37396e-07	4.00854e-06	scaf111	709434	732462	-	1677	-	GO:0005515;	-	-	-	-	-	-
BGIBMGA006406	266.078	405.68	126.477	0.311766	-1.68146	1.38633e-07	4.03546e-06	scaf11	1900222	1942379	-	2742	-	GO:0004252;GO:0004252;GO:0005576;GO:0005576;GO:0006508;GO:0006508;GO:0006508;GO:0006956;GO:0006956;GO:0008233;GO:0008236;GO:0016787;	-	-	-	-	-	-
BGIBMGA005722	203.171	287.253	119.089	0.414577	-1.27029	1.55645e-07	4.47984e-06	scaf120	155390	180523	+	2259	-	GO:0004222;GO:0004222;GO:0006508;GO:0006508;GO:0007218;GO:0007218;GO:0008237;GO:0008237;	-	-	-	-	-	-
BGIBMGA002199	290.56	410.491	170.629	0.415672	-1.26648	1.68881e-07	4.82518e-06	BABH01044028	9827	10890	+	453	-	GO:0003824;GO:0003824;GO:0008152;	-	-	-	-	-	-
BGIBMGA008987	63.5476	103.288	23.8068	0.230489	-2.11723	1.69146e-07	4.82518e-06	scaf17	2465063	2476834	+	936	-	GO:0016020;GO:0016021;GO:0016021;	-	-	-	-	-	-
BGIBMGA013001	62.5293	101.644	23.4151	0.230364	-2.11801	1.7454e-07	4.94608e-06	scaf4	4388820	4391606	+	2139	-	GO:0016614;GO:0016614;GO:0050660;GO:0050660;GO:0055114;GO:0055114;	-	-	-	-	-	-
BGIBMGA010407	549.822	763.959	335.686	0.439403	-1.18638	1.92847e-07	5.44082e-06	scaf6	4786990	4789721	-	945	-	-	-	-	-	-	-	-
BGIBMGA013452	65.4007	105.373	25.4283	0.241316	-2.051	2.16563e-07	6.03042e-06	scaf111	84851	93107	-	912	-	GO:0005515;	-	-	-	-	-	-
BGIBMGA001904	247.028	359.312	134.743	0.375004	-1.41502	2.21223e-07	6.13355e-06	scaf28	746744	750782	-	840	-	-	-	-	-	-	-	101743244
BGIBMGA005300	132.412	195.416	69.4072	0.355176	-1.49339	2.42659e-07	6.64181e-06	scaf19	5419679	5437334	-	1515	-	GO:0006508;GO:0006751;GO:0006751;GO:0036374;GO:0036374;	-	-	-	-	-	-
BGIBMGA010235	186.722	275.5	97.9446	0.355516	-1.49201	2.5702e-07	6.99018e-06	scaf15	2854372	2864321	+	2406	-	-	-	-	-	-	-	-
BGIBMGA010929	661.329	1052.39	270.265	0.25681	-1.96123	2.82331e-07	7.61404e-06	scaf68	739663	747047	-	1293	-	GO:0003677;GO:0003677;GO:0005634;GO:0005634;GO:0006351;GO:0006351;GO:0006355;GO:0006355;GO:0006355;GO:0046983;GO:0046983;	-	-	-	-	-	-
BGIBMGA001498	107.337	167.888	46.7855	0.27867	-1.84337	2.84093e-07	7.62949e-06	scaf7	642053	658676	+	1671	-	GO:0005215;GO:0005215;GO:0016020;GO:0016021;GO:0016021;GO:0016021;GO:0055085;GO:0055085;	K06258	-	-	-	-	101745246
BGIBMGA000379	98.9362	150.794	47.0781	0.312201	-1.67945	2.94957e-07	7.83926e-06	scaf18	1047681	1089336	+	4797	-	GO:0005089;GO:0005089;GO:0005515;GO:0007165;GO:0007165;GO:0035023;GO:0035023;	-	-	-	-	-	-
BGIBMGA006366	575.308	908.18	242.436	0.266948	-1.90537	3.13744e-07	8.22763e-06	scaf11	4969425	4970116	-	312	-	-	-	-	-	-	-	-
BGIBMGA009896	170.325	265.357	75.2933	0.283743	-1.81734	3.17625e-07	8.30419e-06	scaf51	1416517	1418997	+	210	-	GO:0003824;GO:0003824;GO:0005524;GO:0005524;GO:0006003;GO:0006003;	-	-	-	-	-	-
BGIBMGA007922	1716.61	2462.26	970.972	0.394342	-1.34248	3.19756e-07	8.3429e-06	scaf3	6832063	6835272	+	3102	-	-	-	-	-	-	-	-
BGIBMGA011644	61.586	100.898	22.2746	0.220764	-2.17942	3.75988e-07	9.61466e-06	scaf16	3329045	3336828	-	3030	-	GO:0060271;GO:0060271;GO:0090162;GO:0090162;GO:0097539;GO:0097539;	-	-	-	-	-	-
BGIBMGA000145	393.608	647.583	139.633	0.215621	-2.21343	4.63892e-07	1.16536e-05	scaf43	2045801	2046564	+	630	-	GO:0016020;GO:0016021;GO:0016021;	-	-	-	-	-	-
BGIBMGA004431	113.176	168.166	58.1856	0.346001	-1.53115	4.84751e-07	1.2083e-05	scaf37	18701	29356	-	1209	-	GO:0003676;GO:0003676;	-	-	-	-	-	-
BGIBMGA013482	292.688	427.992	157.385	0.367729	-1.44329	4.98352e-07	1.2398e-05	scaf101	974145	1001671	-	2100	-	GO:0004601;GO:0004601;GO:0006979;GO:0006979;GO:0016020;GO:0016021;GO:0016021;GO:0020037;GO:0020037;GO:0055114;GO:0055114;GO:0098869;	-	-	-	-	-	-
BGIBMGA007735	531.691	804.675	258.707	0.321505	-1.63709	5.18967e-07	1.2859e-05	scaf3	1010071	1041775	-	3504	-	GO:0000166;GO:0005524;GO:0005524;GO:0005524;GO:0016020;GO:0016021;GO:0016021;GO:0016021;GO:0016887;GO:0016887;GO:0042626;GO:0042626;GO:0055085;GO:0055085;	-	-	-	-	-	-
BGIBMGA008867	410.907	576.872	244.941	0.424602	-1.23582	5.82148e-07	1.42615e-05	scaf17	4459254	4476025	-	588	-	GO:0005509;GO:0005509;	-	-	-	-	-	-
BGIBMGA010934	384.98	513.435	256.524	0.499624	-1.00109	6.4468e-07	1.54399e-05	scaf68	142750	152011	-	1485	-	GO:0016020;GO:0016021;GO:0016021;GO:0016021;GO:0055085;GO:0055085;	-	-	-	-	-	-
BGIBMGA008538	259.125	365.437	152.813	0.418165	-1.25786	6.94014e-07	1.65289e-05	scaf2	8825717	8840501	+	645	-	-	-	-	-	-	-	-
BGIBMGA008482	16.2835	31.6497	0.917363	0.0289849	-5.10856	7.5084e-07	1.74543e-05	scaf2	4459291	4463978	+	606	-	GO:0003677;GO:0003677;GO:0003677;GO:0005634;GO:0005634;GO:0006355;GO:0006355;GO:0043565;GO:0043565;	K09339	-	-	-	-	101744413
BGIBMGA000848	1611.3	2301.83	920.775	0.400018	-1.32186	7.55465e-07	1.75052e-05	scaf1	14773140	14781488	-	3393	-	GO:0003676;GO:0003676;	-	-	-	-	-	-
BGIBMGA013415	11720.5	17665.4	5775.64	0.326947	-1.61287	7.66783e-07	1.77036e-05	scaf50	1072186	1120724	+	6564	-	GO:0004672;GO:0004672;GO:0004674;GO:0004674;GO:0005524;GO:0005524;GO:0006468;GO:0006468;	-	-	-	-	-	-
BGIBMGA013672	911.074	1242.84	579.312	0.466121	-1.10122	8.09954e-07	1.85668e-05	scaf126	51685	53722	-	600	-	-	-	-	-	-	-	-
BGIBMGA012585	227.227	325.215	129.239	0.397396	-1.33135	8.37874e-07	1.91044e-05	scaf100	1016911	1022446	-	1188	-	GO:0008152;GO:0016787;GO:0016787;GO:0016787;	-	-	-	-	-	-
BGIBMGA011614	215.876	299.36	132.393	0.442253	-1.17706	8.48039e-07	1.92337e-05	scaf16	5382902	5388152	-	498	-	GO:0004842;GO:0004842;GO:0016020;GO:0016021;GO:0016021;GO:0016567;GO:0016567;GO:0016740;GO:0046872;GO:0046872;	-	-	-	-	-	-
BGIBMGA011703	1264.38	1707.61	821.144	0.480873	-1.05627	9.22837e-07	2.07106e-05	scaf16	1122511	1130992	-	741	-	-	-	-	-	-	-	-
BGIBMGA009895	2529.85	3868.64	1191.07	0.307877	-1.69958	1.00639e-06	2.23512e-05	scaf51	1409929	1415171	+	1212	-	GO:0003824;GO:0003824;GO:0003873;GO:0003873;GO:0005524;GO:0005524;GO:0006000;GO:0006000;GO:0006003;GO:0006003;GO:0046835;	-	-	-	-	-	-
BGIBMGA005788	170.651	274.949	66.3526	0.241327	-2.05094	1.04079e-06	2.2917e-05	scaf54	157357	157590	+	234	-	-	-	-	-	-	-	-
BGIBMGA006869	206.962	287.081	126.844	0.441841	-1.1784	1.08249e-06	2.35923e-05	scaf70	1180002	1194887	+	795	-	GO:0016020;GO:0016020;GO:0016020;GO:0016021;GO:0016021;	-	-	-	-	-	-
BGIBMGA013107	3055.57	4631.54	1479.59	0.31946	-1.64629	1.1388e-06	2.4694e-05	scaf4	9085120	9087288	+	1557	-	-	-	-	-	-	-	-
BGIBMGA010581	301.473	405.733	197.213	0.486067	-1.04077	1.16741e-06	2.51865e-05	scaf6	7693124	7700622	+	1563	-	-	-	-	-	-	-	-
BGIBMGA002746	834.484	1166.64	502.333	0.430582	-1.21564	1.18993e-06	2.56293e-05	scaf117	22570	24949	-	408	-	-	-	-	-	-	-	-
BGIBMGA012921	462.636	622.422	302.849	0.486564	-1.0393	1.20701e-06	2.5867e-05	scaf4	276800	302844	+	2808	-	GO:0051015;GO:0051015;	-	-	-	-	-	-
BGIBMGA001182	13029.5	18278.6	7780.37	0.425654	-1.23225	1.5974e-06	3.34517e-05	scaf1	7876736	7883446	+	3951	-	-	-	-	-	-	-	-
BGIBMGA009656	313.262	417.945	208.579	0.499057	-1.00272	1.77551e-06	3.67616e-05	scaf27	3477032	3478681	-	1650	-	GO:0008270;GO:0008270;	-	-	-	-	-	101738020
BGIBMGA001347	159.687	225.938	93.4371	0.413553	-1.27386	1.77923e-06	3.67792e-05	scaf118	605960	609092	-	663	P25	GO:0005198;GO:0005198;GO:0005198;GO:0005576;GO:0005576;GO:0005576;	-	-	-	-	Fibrohexamerin [Source:UniProtKB/Swiss-Prot;Acc:P04148]	-
BGIBMGA000514	128.042	184.911	71.1724	0.384901	-1.37744	1.7888e-06	3.69177e-05	scaf8	5914470	5916638	-	357	-	-	-	-	-	-	-	-
BGIBMGA005566	52.0948	84.5778	19.6117	0.231878	-2.10856	1.92829e-06	3.94791e-05	scaf33	1967640	1969175	-	771	-	-	-	-	-	-	-	-
BGIBMGA009168	38.2638	64.9491	11.5786	0.178272	-2.48785	1.97604e-06	4.02003e-05	scaf96	1443573	1457855	+	2757	-	-	-	-	-	-	-	-
BGIBMGA001775	256.126	358.016	154.236	0.430806	-1.21489	2.1458e-06	4.33789e-05	scaf35	1932427	1937904	+	1164	-	GO:0003676;GO:0003676;	-	-	-	-	-	-
BGIBMGA013456	197.839	285.417	110.262	0.38632	-1.37213	2.195e-06	4.43037e-05	scaf111	13579	17910	-	795	-	GO:0016020;GO:0016021;GO:0016021;	-	-	-	-	-	-
BGIBMGA012319	266.607	359.317	173.897	0.483966	-1.04702	2.39507e-06	4.75937e-05	scaf26	1153752	1167537	+	1014	-	-	-	-	-	-	-	-
BGIBMGA010299	53.2293	85.7063	20.7522	0.242132	-2.04614	2.47229e-06	4.86761e-05	scaf127	224417	224931	-	282	-	-	-	-	-	-	-	-
BGIBMGA005321	254.527	344.384	164.669	0.478156	-1.06445	2.47774e-06	4.87086e-05	scaf19	4455585	4457882	-	261	-	-	-	-	-	-	-	-
BGIBMGA011982	3386.6	4851.53	1921.68	0.396099	-1.33607	2.77999e-06	5.36975e-05	scaf59	1392001	1431668	+	12990	-	GO:0005509;GO:0005509;GO:0005515;GO:0016020;GO:0016021;GO:0016021;	-	-	-	-	-	-
BGIBMGA013574	42.9877	71.2084	14.7671	0.207378	-2.26967	2.80163e-06	5.40007e-05	scaf78	1291754	1303120	-	1278	-	GO:0016020;GO:0016021;GO:0016021;GO:0016021;GO:0022857;GO:0022857;GO:0055085;GO:0055085;	-	-	-	-	-	-
BGIBMGA007189	336.105	478.791	193.42	0.403975	-1.30766	2.91507e-06	5.59354e-05	scaf74	173442	179158	+	873	-	GO:0003676;GO:0003676;	-	-	-	-	-	-
BGIBMGA006120	972.384	1510.77	433.997	0.287269	-1.79953	3.27538e-06	6.17416e-05	scaf5	2045275	2046327	+	1053	-	GO:0003676;GO:0003676;	-	-	-	-	-	-
BGIBMGA002677	2490.81	3547.73	1433.89	0.40417	-1.30696	3.51099e-06	6.54144e-05	scaf20	2159330	2161029	+	507	-	-	-	-	-	-	-	101737970
BGIBMGA003276	358.334	488.393	228.274	0.467399	-1.09727	4.0238e-06	7.40021e-05	scaf73	1354098	1356880	+	345	-	-	-	-	-	-	-	-
BGIBMGA008087	274.658	367.173	182.144	0.49607	-1.01138	4.5924e-06	8.26825e-05	scaf41	3686039	3704902	+	2526	-	GO:0000166;GO:0003676;GO:0003676;GO:0003677;GO:0003677;GO:0004003;GO:0004003;GO:0004386;GO:0005524;GO:0005524;GO:0005524;GO:0005634;GO:0005634;GO:0006139;GO:0006139;GO:0008026;GO:0008026;GO:0016787;GO:0016818;GO:0016818;GO:0032508;	-	-	-	-	-	-
BGIBMGA005854	774.487	1100.85	448.119	0.407065	-1.29667	4.92019e-06	8.809e-05	scaf125	5279	14755	-	1998	-	GO:0005515;GO:0016020;GO:0016021;GO:0016021;	-	-	-	-	-	-
BGIBMGA013520	112.413	163.418	61.4088	0.375779	-1.41205	4.96884e-06	8.85902e-05	scaf101	398207	407994	+	336	-	-	-	-	-	-	-	-
BGIBMGA008358	1139.19	1549.62	728.764	0.470285	-1.08839	5.20055e-06	9.24646e-05	scaf2	3863836	3888537	-	4107	-	-	-	-	-	-	-	-
BGIBMGA005227	283.547	435.068	132.026	0.303461	-1.72042	6.38115e-06	0.000109658	scaf110	141484	144389	+	315	-	GO:0005524;GO:0005524;GO:0016887;GO:0016887;	-	-	-	-	-	-
BGIBMGA003967	23.1534	41.8538	4.45294	0.106393	-3.23253	6.5231e-06	0.000111629	scaf36	4055612	4057512	-	303	-	GO:0006644;GO:0006644;GO:0016020;GO:0016021;GO:0016021;GO:0016311;GO:0030111;GO:0030111;GO:0042577;GO:0042577;	-	-	-	-	-	-
BGIBMGA004642	1808.98	2436	1181.96	0.485204	-1.04334	6.53058e-06	0.000111629	scaf164	98369	100234	-	1866	-	GO:0008408;GO:0008408;GO:0008409;GO:0008409;GO:0090503;GO:0090503;	-	-	-	-	-	101739128
BGIBMGA008961	239.421	321.681	157.162	0.488564	-1.03338	6.68022e-06	0.000113883	scaf17	1497293	1499543	+	624	-	GO:0003676;GO:0003676;GO:0003677;GO:0003677;	-	-	-	-	-	101741784
BGIBMGA002265	220.24	298.576	141.904	0.475269	-1.07318	6.71258e-06	0.000114222	scaf34	1475950	1481391	-	519	-	GO:0003779;GO:0003779;GO:0007010;GO:0007010;	-	-	-	-	-	-
BGIBMGA000357	103.369	150.832	55.9046	0.370641	-1.43191	7.16232e-06	0.000120977	scaf18	103721	105420	-	480	PTTH	-	-	-	-	-	Prothoracicotropic hormone P2K P6KProthoracicotropic hormone [Source:UniProtKB/Swiss-Prot;Acc:P17219]	-
BGIBMGA003099	180.499	247.092	113.907	0.460989	-1.1172	7.26928e-06	0.000122462	scaf13	2122871	2163775	+	1626	-	GO:0004114;GO:0004114;GO:0007165;GO:0007165;GO:0008081;GO:0008081;GO:0016787;GO:0046872;GO:0046872;	-	-	-	-	-	-
BGIBMGA012410	82.7692	123.83	41.7078	0.336814	-1.56998	7.97077e-06	0.000133057	scaf86	1458522	1459390	-	255	-	-	-	-	-	-	-	-
BGIBMGA011409	393.708	568.796	218.62	0.384356	-1.37948	8.77271e-06	0.000144936	scaf12	6317622	6320720	+	642	-	GO:0016020;GO:0016020;GO:0016020;GO:0016021;GO:0016021;	-	-	-	-	-	-
BGIBMGA001564	84.4667	141.422	27.511	0.194531	-2.36193	8.80889e-06	0.000145347	scaf7	5545416	5554980	+	1839	-	-	-	-	-	-	-	-
BGIBMGA001879	77.7689	116.964	38.5739	0.329793	-1.60037	8.86718e-06	0.000145746	scaf28	2375223	2379334	-	801	-	-	-	-	-	-	-	-
BGIBMGA010270	166.409	234.793	98.0239	0.417491	-1.26018	8.98394e-06	0.000147477	scaf15	5005066	5008714	+	492	-	-	-	-	-	-	-	-
BGIBMGA003683	47.0985	75.7604	18.4365	0.243353	-2.03888	9.94901e-06	0.000161665	scaf9	4108597	4120435	+	1251	-	GO:0005506;GO:0005506;GO:0016705;GO:0016705;GO:0020037;GO:0020037;GO:0055114;GO:0055114;	-	-	-	-	-	-
BGIBMGA009488	76.9864	115.711	38.2615	0.330664	-1.59656	1.01752e-05	0.000164716	scaf40	621406	637293	+	1188	-	GO:0003993;GO:0003993;GO:0016311;	-	-	-	-	-	-
BGIBMGA003646	354.303	609.497	99.1099	0.162609	-2.62052	1.02139e-05	0.000165134	scaf9	2481791	2505492	+	2919	-	GO:0005515;GO:0016020;GO:0016021;GO:0016021;	-	-	-	-	-	-
BGIBMGA005097	3128.71	5226.71	1030.71	0.197201	-2.34226	1.13325e-05	0.000180291	scaf32	24432	25823	+	1074	-	-	-	-	-	-	-	-
BGIBMGA004427	721.699	1041.61	401.79	0.38574	-1.3743	1.1334e-05	0.000180291	scaf37	339040	341512	-	576	-	GO:0016020;GO:0016021;GO:0016021;GO:0016021;GO:0022857;GO:0022857;GO:0055085;GO:0055085;	-	-	-	-	-	-
BGIBMGA001987	185.571	253.294	117.849	0.465266	-1.10387	1.14368e-05	0.0001817	scaf28	4575848	4583020	+	693	-	-	-	-	-	-	-	-
BGIBMGA002467	69.9506	107.367	32.5342	0.303018	-1.72252	1.21023e-05	0.000190755	scaf14	1260394	1268844	+	741	-	-	-	-	-	-	-	-
BGIBMGA011796	225.486	301.809	149.163	0.494232	-1.01674	1.24667e-05	0.000195642	scaf16	1758579	1763359	+	708	-	-	-	-	-	-	-	-
BGIBMGA005857	82.3306	124.342	40.3193	0.324262	-1.62477	1.29295e-05	0.000201918	scaf125	57202	57669	+	468	-	-	-	-	-	-	-	-
BGIBMGA013066	60.2174	93.0032	27.4316	0.294954	-1.76144	1.39376e-05	0.000215781	scaf4	7255521	7255931	+	411	-	-	-	-	-	-	-	-
BGIBMGA008066	178.902	243.917	113.887	0.466909	-1.09879	1.40988e-05	0.000216944	scaf41	1279672	1293170	+	3186	-	GO:0004177;GO:0004177;GO:0006508;GO:0006508;GO:0008237;GO:0008237;GO:0008270;GO:0008270;	K11140	EC:3.4.11.2	-	-	Aminopeptidase N-8[Source:UniProtKB/TrEMBL;Acc:H9JEW9]	101737565
BGIBMGA000238	17.4327	33.9927	0.872739	0.0256743	-5.28353	1.41114e-05	0.000216944	scaf18	4599000	4611061	-	1458	-	GO:0004601;GO:0004601;GO:0006979;GO:0006979;GO:0020037;GO:0020037;GO:0042600;GO:0042600;GO:0055114;GO:0055114;GO:0098869;	-	-	-	-	-	-
BGIBMGA010362	191.028	259.586	122.471	0.471792	-1.08378	1.49534e-05	0.000228249	scaf6	8035456	8040341	-	1755	-	-	-	-	-	-	-	-
BGIBMGA003741	88.5155	130.166	46.8649	0.360039	-1.47377	1.4986e-05	0.000228474	scaf9	7061952	7070856	+	1407	-	-	-	-	-	-	-	-
BGIBMGA008283	149.631	207.457	91.8058	0.44253	-1.17615	1.53019e-05	0.000232188	scaf94	1411330	1433280	+	2808	-	GO:0004435;GO:0004435;GO:0004435;GO:0005509;GO:0005509;GO:0005622;GO:0005622;GO:0006629;GO:0006629;GO:0006629;GO:0007165;GO:0007165;GO:0007165;GO:0008081;GO:0008081;GO:0016042;GO:0016042;GO:0016787;GO:0035556;GO:0035556;	-	-	-	-	-	-
BGIBMGA007616	399.494	533.498	265.49	0.49764	-1.00683	1.59145e-05	0.000239782	scaf3	9123851	9132289	-	1461	-	GO:0000166;GO:0003676;GO:0003676;GO:0005525;GO:0005525;GO:0005525;	-	-	-	-	-	-
BGIBMGA000592	69.2634	104.986	33.5408	0.319479	-1.64621	1.59594e-05	0.000239896	scaf8	876572	877930	-	1359	-	GO:0004177;GO:0004177;GO:0005622;GO:0005622;GO:0005737;GO:0005737;GO:0006508;GO:0006508;GO:0008235;GO:0008235;GO:0019538;GO:0019538;GO:0030145;GO:0030145;	-	-	-	-	-	-
BGIBMGA005952	179.883	244.615	115.151	0.470745	-1.08698	1.62827e-05	0.000244183	scaf5	7153045	7174834	-	849	-	GO:0000166;GO:0004672;GO:0004672;GO:0004674;GO:0004674;GO:0004674;GO:0005524;GO:0005524;GO:0005524;GO:0006468;GO:0006468;GO:0016301;GO:0016310;GO:0016740;	-	-	-	-	-	-
BGIBMGA010357	57.0232	88.3602	25.6862	0.290698	-1.78241	1.6447e-05	0.000246359	scaf6	8137737	8167553	-	5058	-	GO:0005515;	-	-	-	-	-	-
BGIBMGA001313	106.929	167.865	45.9921	0.273983	-1.86784	1.67873e-05	0.000250871	scaf139	63726	76337	-	1650	-	GO:0005215;GO:0005215;GO:0016020;GO:0016021;GO:0016021;GO:0016021;GO:0022857;GO:0022857;GO:0055085;GO:0055085;	-	-	-	-	-	101741247
BGIBMGA011283	719.316	987.453	451.179	0.456912	-1.13001	1.85604e-05	0.000275763	scaf12	1543366	1550739	-	2448	-	GO:0004672;GO:0004672;GO:0005524;GO:0005524;GO:0006468;GO:0006468;	K17541	-	-	-	-	101743513
BGIBMGA006731	695.057	1001.3	388.818	0.388315	-1.3647	1.89761e-05	0.000281289	scaf10	4019871	4020419	+	549	-	-	-	-	-	-	-	101746349
BGIBMGA012530	58.0827	89.785	26.3804	0.293817	-1.76701	2.17615e-05	0.000316368	scaf77	1084924	1085709	-	786	-	-	-	-	-	-	-	-
BGIBMGA006542	40.7711	66.1255	15.4167	0.233143	-2.10071	2.46416e-05	0.00035383	scaf10	7258575	7259999	-	1425	-	-	-	-	-	-	-	-
BGIBMGA001944	390.92	587.631	194.208	0.330494	-1.5973	2.84105e-05	0.000401658	scaf28	2437585	2444466	+	987	-	GO:0016020;GO:0016021;GO:0016021;	-	-	-	-	-	-
BGIBMGA002356	1023	1391.57	654.432	0.470283	-1.0884	2.84485e-05	0.000401754	scaf116	418669	419283	-	615	-	-	-	-	-	-	-	101741301
BGIBMGA002368	151.892	208.968	94.8158	0.453734	-1.14008	2.87992e-05	0.000405813	scaf248	2860	4292	+	360	-	GO:0005615;GO:0005615;	-	-	-	-	-	-
BGIBMGA012504	36.9665	60.5643	13.3687	0.220736	-2.17961	3.00039e-05	0.00042048	scaf56	1793390	1806247	+	1167	-	GO:0004888;GO:0004888;GO:0005216;GO:0005216;GO:0005230;GO:0005230;GO:0005886;GO:0005886;GO:0006811;GO:0006811;GO:0006811;GO:0016020;GO:0016021;GO:0016021;GO:0016021;GO:0034220;GO:0034220;	-	-	-	-	-	-
BGIBMGA009237	176.155	238.542	113.768	0.47693	-1.06815	3.16289e-05	0.000439415	scaf38	1129731	1130197	-	417	-	GO:0004861;GO:0004861;GO:0005634;GO:0005634;GO:0007050;GO:0007050;GO:0007346;GO:0007346;GO:0045736;GO:0072331;GO:0072331;	-	-	-	-	-	-
BGIBMGA006268	702.922	971.564	434.28	0.446991	-1.16168	3.22953e-05	0.000447705	scaf49	1960237	1963563	-	495	-	-	-	-	-	-	-	-
BGIBMGA007435	101.973	145.19	58.7558	0.404682	-1.30514	3.60543e-05	0.000491848	scaf55	2449905	2451173	+	1269	-	GO:0016020;GO:0016021;GO:0016021;	-	-	-	-	-	-
BGIBMGA008806	35.7697	58.7856	12.7538	0.216955	-2.20453	3.62644e-05	0.000493665	scaf134	68500	95325	-	5772	-	-	-	-	-	-	-	-
BGIBMGA004535	565.579	857.234	273.925	0.319545	-1.64591	4.06695e-05	0.000545533	scaf97	1035659	1036427	+	186	-	-	-	-	-	-	-	-
BGIBMGA007803	651.537	873.966	429.108	0.490989	-1.02624	4.17785e-05	0.000559239	scaf3	1424585	1427776	+	1047	-	GO:0016020;GO:0016021;GO:0016021;	-	-	-	-	-	-
BGIBMGA004667	1551.86	2102.07	1001.64	0.476502	-1.06945	4.18996e-05	0.000559693	scaf135	359585	363932	+	1134	-	-	-	-	-	-	-	-
BGIBMGA012698	55.1734	84.75	25.5969	0.302029	-1.72724	4.46686e-05	0.000593593	scaf69	562942	569901	+	1443	-	GO:0003677;GO:0003677;GO:0008270;GO:0008270;	-	-	-	-	-	-
BGIBMGA014587	185.486	248	122.971	0.495851	-1.01202	4.83508e-05	0.000639217	scaf482	12713	13444	-	732	-	-	-	-	-	-	-	101744156
BGIBMGA010698	131.841	182.348	81.3329	0.446031	-1.16478	4.87432e-05	0.00064308	scaf148	229358	234728	+	522	-	-	-	-	-	-	-	101736665
BGIBMGA002374	73.5363	108.409	38.6631	0.356639	-1.48746	5.11642e-05	0.000670199	scaf14	6554789	6558137	-	945	-	GO:0005515;	-	-	-	-	-	-
BGIBMGA002154	585.333	832.972	337.694	0.405408	-1.30255	5.49837e-05	0.000712236	scaf64	2133463	2138845	-	618	-	-	-	-	-	-	-	-
BGIBMGA005172	37.2523	60.2631	14.2414	0.236321	-2.08118	5.54497e-05	0.000717549	scaf32	4229880	4234953	+	678	-	GO:0004252;GO:0004252;GO:0006508;GO:0006508;	-	-	-	-	-	-
BGIBMGA000508	35.5881	60.6934	10.4827	0.172716	-2.53352	5.6463e-05	0.00072919	scaf8	6289436	6295321	-	2181	-	-	-	-	-	-	-	-
BGIBMGA013794	156.948	213.051	100.846	0.473339	-1.07905	5.68638e-05	0.000733629	scaf47	1846803	1883194	+	3156	-	GO:0005515;	-	-	-	-	-	-
BGIBMGA013215	39.4919	63.2994	15.6844	0.247781	-2.01286	5.86962e-05	0.000754993	scaf39	148305	155924	+	2004	-	GO:0016614;GO:0016614;GO:0050660;GO:0050660;GO:0055114;GO:0055114;	-	-	-	-	-	-
BGIBMGA013924	825.385	1164.05	486.718	0.418125	-1.258	6.04024e-05	0.000775386	scaf29	958527	971675	-	1380	-	-	-	-	-	-	-	-
BGIBMGA012947	63.3087	101.591	25.0267	0.246348	-2.02123	6.25471e-05	0.000798129	scaf4	1341486	1347407	+	534	-	GO:0009166;GO:0009166;GO:0016787;GO:0016787;	-	-	-	-	-	-
BGIBMGA005716	57.5889	87.399	27.7788	0.317838	-1.65363	6.60781e-05	0.000839016	scaf120	82501	83888	-	168	-	GO:0016810;GO:0016810;	-	-	-	-	-	-
BGIBMGA010364	1312.12	1749.84	874.411	0.499709	-1.00084	6.92674e-05	0.000872606	scaf6	7973811	7977748	-	3048	-	-	-	-	-	-	-	-
BGIBMGA006745	68.249	101.122	35.3755	0.349829	-1.51528	7.1627e-05	0.000899683	scaf10	4836432	4840937	+	2130	-	GO:0005507;GO:0005507;GO:0016491;GO:0016491;GO:0016491;GO:0046872;GO:0055114;GO:0055114;GO:0055114;	-	-	-	-	-	-
BGIBMGA000687	59.5496	89.6989	29.4002	0.327766	-1.60926	7.17413e-05	0.000900238	scaf8	4626664	4629813	+	963	-	GO:0016020;GO:0016020;GO:0016020;GO:0016021;GO:0016021;GO:0022857;GO:0022857;GO:0055085;GO:0055085;	-	-	-	-	-	-
BGIBMGA008947	154.154	208.36	99.9479	0.479688	-1.05983	7.24483e-05	0.000907335	scaf17	865010	866891	+	390	-	-	-	-	-	-	-	-
BGIBMGA004938	656.575	887.613	425.538	0.479419	-1.06064	7.37062e-05	0.000919229	scaf65	899015	900529	-	1515	-	-	-	-	-	-	-	-
BGIBMGA006036	2184.2	3190.99	1177.4	0.368977	-1.4384	8.5176e-05	0.00102957	scaf5	1533777	1536667	-	2463	-	GO:0016020;GO:0016021;GO:0016021;	-	-	-	-	-	-
BGIBMGA014033	166.008	222.681	109.335	0.490992	-1.02623	8.81728e-05	0.00105882	scaf173	12619	15164	-	363	-	-	-	-	-	-	-	-
BGIBMGA010681	132.01	212.558	51.4616	0.242106	-2.04629	9.16654e-05	0.00109258	scaf84	1412149	1418779	+	1062	-	GO:0006629;GO:0006629;GO:0006633;GO:0006633;GO:0016020;GO:0016021;GO:0016021;GO:0016491;GO:0016717;GO:0016717;GO:0055114;GO:0055114;GO:0055114;	K00507	EC:1.14.19.1	-	-	-	692568
BGIBMGA002162	159.507	214.142	104.872	0.489732	-1.02994	9.52734e-05	0.00112721	scaf64	1910951	1921041	-	2703	-	GO:0005509;GO:0005509;GO:0007156;GO:0007156;GO:0016020;GO:0016020;GO:0016020;GO:0016021;GO:0016021;	-	-	-	-	-	-
BGIBMGA003213	51.5614	79.1028	24.0201	0.303656	-1.71949	9.60218e-05	0.00113293	scaf73	1895671	1901107	-	4902	-	-	-	-	-	-	-	-
BGIBMGA000130	318.255	426.652	209.858	0.491872	-1.02365	0.000104689	0.00121619	scaf43	1337459	1344452	+	1113	-	GO:0005515;	-	-	-	-	-	-
BGIBMGA000730	160.697	215.738	105.655	0.489739	-1.02992	0.000105768	0.00122651	scaf8	6817689	6819957	+	123	-	-	-	-	-	-	-	-
BGIBMGA005718	807.915	1113.79	502.041	0.45075	-1.1496	0.000109731	0.00126447	scaf120	45060	48800	-	468	-	GO:0016810;GO:0016810;	-	-	-	-	-	-
BGIBMGA013249	123.688	169.758	77.6188	0.457232	-1.129	0.000122654	0.00139214	scaf39	2176093	2176371	+	153	-	-	-	-	-	-	-	-
BGIBMGA014323	93.5187	131.515	55.5228	0.422179	-1.24407	0.000138964	0.00153915	scaf1175	207	4563	+	897	-	GO:0009063;GO:0009063;GO:0016052;GO:0016052;GO:0050023;GO:0050023;	-	-	-	-	-	-
BGIBMGA011535	255.224	383.01	127.439	0.332731	-1.58757	0.000144685	0.00158617	scaf22	1402162	1425993	+	6807	-	GO:0000166;GO:0004672;GO:0004672;GO:0004713;GO:0004713;GO:0004713;GO:0004714;GO:0004714;GO:0004714;GO:0005515;GO:0005524;GO:0005524;GO:0005524;GO:0006468;GO:0006468;GO:0007169;GO:0007169;GO:0016020;GO:0016020;GO:0016020;GO:0016021;GO:0016021;GO:0016301;GO:0016310;GO:0016740;GO:0018108;	-	-	-	-	Tyrosine-protein kinase receptor[Source:UniProtKB/TrEMBL;Acc:H9JPT0]	-
BGIBMGA012796	119.808	163.767	75.8485	0.46315	-1.11045	0.000151842	0.00164906	scaf4	7221004	7223634	-	456	-	-	-	-	-	-	-	101744415
BGIBMGA012479	2438.29	3877.58	998.994	0.257633	-1.95661	0.000153257	0.00165882	scaf56	366145	375670	-	2511	-	GO:0008270;GO:0008270;	-	-	-	-	-	-
BGIBMGA011683	74.1266	107.195	41.0582	0.383024	-1.38449	0.000161891	0.00173959	scaf16	1500150	1508105	-	1272	-	GO:0000166;GO:0000166;GO:0016020;GO:0016021;GO:0016021;	-	-	-	-	-	-
BGIBMGA003120	18.1615	32.1279	4.19507	0.130574	-2.93706	0.000169336	0.00180695	scaf13	2988340	2990533	+	576	-	GO:0003779;GO:0003779;GO:0007010;GO:0007010;GO:0007015;GO:0007015;GO:0007300;GO:0007300;GO:0051015;GO:0051015;	-	-	-	-	-	-
BGIBMGA009866	36.7355	58.1783	15.2927	0.262859	-1.92764	0.000172361	0.00182998	scaf51	302253	311613	-	1314	-	GO:0003824;GO:0003824;GO:0004035;GO:0004035;GO:0016311;GO:0016787;GO:0016791;GO:0016791;	-	-	-	-	Alkaline phosphatase[Source:UniProtKB/TrEMBL;Acc:H9JK15]	-
BGIBMGA006730	485.286	664.783	305.789	0.459984	-1.12034	0.000175299	0.00185823	scaf10	4016427	4017113	+	513	-	-	-	-	-	-	-	101746207
BGIBMGA004060	74.779	107.85	41.7078	0.38672	-1.37064	0.00017948	0.00189941	scaf36	111438	114701	+	2967	-	-	-	-	-	-	-	-
BGIBMGA009867	45.8849	78.2325	13.5373	0.17304	-2.53082	0.000180349	0.00190704	scaf51	220367	225072	-	417	-	GO:0000166;GO:0000166;GO:0005622;GO:0005622;GO:0009190;GO:0009190;GO:0016020;GO:0016021;GO:0016021;GO:0016829;GO:0016849;GO:0016849;GO:0035556;GO:0035556;	-	-	-	-	-	-
BGIBMGA005789	40.9775	68.8987	13.0563	0.1895	-2.39973	0.000185726	0.00195584	scaf54	179684	180130	+	333	-	GO:0016020;GO:0016021;GO:0016021;	-	-	-	-	-	-
BGIBMGA007600	47.1925	72.289	22.0961	0.305663	-1.70998	0.000196319	0.00205391	scaf3	9699212	9702074	-	492	-	GO:0016021;	-	-	-	-	-	-
BGIBMGA012022	92.3161	129.645	54.9873	0.424138	-1.2374	0.000198635	0.00207645	scaf24	4215874	4219332	-	741	-	-	-	-	-	-	-	-
BGIBMGA010735	57.3579	85.147	29.5689	0.347269	-1.52588	0.00019986	0.00208756	scaf25	2563689	2578616	-	1440	-	GO:0004553;GO:0004553;GO:0005975;GO:0005975;	-	-	-	-	-	-
BGIBMGA011093	33.3676	53.2772	13.4579	0.252602	-1.98506	0.000202831	0.00211343	scaf31	4421354	4428986	+	1674	-	GO:0005215;GO:0005215;GO:0016020;GO:0016021;GO:0016021;GO:0016021;GO:0022857;GO:0022857;GO:0055085;GO:0055085;	-	-	-	-	-	-
BGIBMGA010454	91.4118	127.871	54.9525	0.42975	-1.21843	0.000210265	0.00218027	scaf6	1404481	1429006	-	1917	-	GO:0007155;GO:0007155;GO:0007155;GO:0007229;GO:0007229;GO:0008305;GO:0008305;GO:0016020;GO:0016021;	-	-	-	-	-	-
BGIBMGA006579	90.7386	126.996	54.4814	0.429001	-1.22095	0.000211334	0.00218958	scaf10	5326482	5333183	-	822	-	GO:0004888;GO:0004888;GO:0005216;GO:0005216;GO:0005230;GO:0005230;GO:0005886;GO:0005886;GO:0006811;GO:0006811;GO:0006811;GO:0016020;GO:0016021;GO:0016021;GO:0016021;GO:0034220;GO:0034220;	-	-	-	-	-	-
BGIBMGA005941	127.837	183.257	72.4172	0.395168	-1.33946	0.000237021	0.00241479	scaf5	7942791	7949769	-	798	-	GO:0016020;GO:0016021;GO:0016021;	-	-	-	-	-	-
BGIBMGA004925	23.5523	39.855	7.24966	0.181901	-2.45878	0.000237892	0.00242175	scaf65	1199083	1202442	-	516	-	GO:0016020;GO:0016021;GO:0016021;	-	-	-	-	-	101738037
BGIBMGA003049	578.615	838.132	319.099	0.380726	-1.39317	0.00024805	0.00250135	scaf13	2460839	2475391	-	2265	GPD	GO:0004368;GO:0004368;GO:0004368;GO:0005509;GO:0005509;GO:0006072;GO:0006072;GO:0006072;GO:0009331;GO:0009331;GO:0009331;GO:0016491;GO:0016491;GO:0016491;GO:0052590;GO:0052591;GO:0052591;GO:0055114;GO:0055114;GO:0055114;	K00111	EC:1.1.5.3	-	-	Glycerol-3-phosphate dehydrogenase[Source:UniProtKB/TrEMBL;Acc:B0EVL7]	100037430
BGIBMGA002187	582.589	980.203	184.975	0.188711	-2.40575	0.000253342	0.00254871	scaf64	1677927	1683316	+	771	NANOSO	GO:0003723;GO:0003723;GO:0003723;GO:0006417;GO:0006417;GO:0008270;GO:0008270;	K18741	-	-	-	Zinc finger protein NANOS-O[Source:UniProtKB/TrEMBL;Acc:A5LI39]	100101221
BGIBMGA013068	143.321	218.421	68.2221	0.312343	-1.6788	0.000255684	0.00256223	scaf4	7362968	7364874	+	717	-	GO:0003677;GO:0003677;GO:0003677;GO:0005634;GO:0005634;GO:0006351;GO:0006351;GO:0006355;GO:0006355;	-	-	-	-	-	-
BGIBMGA001263	65.3234	94.8249	35.8218	0.377767	-1.40443	0.000256816	0.00256957	scaf1	11752912	11753881	+	885	-	-	-	-	-	-	-	-
BGIBMGA008174	2866.48	4126.29	1606.68	0.389376	-1.36077	0.00025725	0.0025719	scaf52	1035138	1037822	+	816	-	-	-	-	-	-	-	-
BGIBMGA005341	376.556	599.164	153.948	0.256939	-1.9605	0.000295578	0.00291633	scaf19	3432547	3433740	-	555	-	GO:0016020;GO:0016021;GO:0016021;	-	-	-	-	-	101740157
BGIBMGA012622	108.998	148.623	69.3724	0.466767	-1.09923	0.000297635	0.00293226	scaf100	1128516	1138180	+	1317	-	GO:0046872;GO:0046872;	-	-	-	-	-	-
BGIBMGA007766	1649.32	2339.53	959.116	0.409962	-1.28644	0.000303373	0.00298193	scaf3	43287	44423	+	1137	-	GO:0006629;GO:0006629;GO:0008081;GO:0008081;	-	-	-	-	-	101740291
BGIBMGA013435	38.2968	59.9571	16.6365	0.277474	-1.84957	0.000303614	0.00298202	scaf111	624690	640042	-	1500	-	GO:0016020;GO:0016021;GO:0016021;GO:0016021;GO:0055085;GO:0055085;	-	-	-	-	-	-
BGIBMGA002876	177.751	251.983	103.518	0.410814	-1.28344	0.000310094	0.00303174	scaf30	1263115	1279868	+	1461	-	GO:0004222;GO:0004222;GO:0006508;GO:0006508;GO:0008237;GO:0008237;GO:0016020;GO:0016021;GO:0016021;GO:0046872;	-	-	-	-	-	-
BGIBMGA009818	108.617	148.7	68.5345	0.460892	-1.1175	0.000311624	0.00304207	scaf161	109808	111036	+	540	-	GO:0005549;GO:0005549;	-	-	-	-	-	-
BGIBMGA010567	116.088	161.94	70.2353	0.433712	-1.20519	0.000323217	0.00314329	scaf6	6589252	6594094	+	681	-	-	-	-	-	-	-	-
BGIBMGA005182	725.312	989.447	461.176	0.466095	-1.1013	0.000323862	0.00314717	scaf119	665472	678880	-	2202	-	GO:0003824;GO:0003824;GO:0005992;GO:0005992;	-	-	-	-	-	-
BGIBMGA009357	100.679	138.587	62.7724	0.452947	-1.14258	0.000325672	0.00316237	scaf53	264276	275471	+	1524	-	GO:0005515;	-	-	-	-	-	-
BGIBMGA001034	31.524	53.6166	9.4315	0.175907	-2.50712	0.000326488	0.00316789	scaf1	4170683	4171693	-	1011	-	-	-	-	-	-	-	101740370
BGIBMGA003037	55.4531	83.7075	27.1987	0.324925	-1.62182	0.000337315	0.00325572	scaf13	3028011	3036136	-	1230	-	GO:0004181;GO:0004181;GO:0006508;GO:0006508;GO:0008270;GO:0008270;	-	-	-	-	-	-
BGIBMGA006381	38.0824	59.3498	16.815	0.283321	-1.81949	0.000347096	0.0033201	scaf11	4092999	4098870	-	249	-	GO:0005576;GO:0005576;GO:0006030;GO:0006030;GO:0008061;GO:0008061;	-	-	-	-	-	-
BGIBMGA013767	25.1632	41.7677	8.55876	0.204913	-2.28691	0.000347347	0.0033201	scaf47	115456	116945	-	231	-	-	-	-	-	-	-	-
BGIBMGA008851	1787.2	2650.15	924.256	0.348756	-1.51971	0.000366303	0.00347541	scaf17	5599307	5606762	-	1329	-	GO:0004114;GO:0004114;GO:0007165;GO:0007165;GO:0008081;GO:0008081;GO:0016787;GO:0046872;GO:0046872;	-	-	-	-	-	-
BGIBMGA012721	26.6882	43.6325	9.74387	0.223317	-2.16284	0.000386366	0.00362047	scaf93	1452803	1459827	-	714	-	GO:0005634;GO:0005634;GO:0006355;GO:0006355;	-	-	-	-	-	-
BGIBMGA008850	441.583	637.371	245.794	0.385637	-1.37468	0.000399699	0.00371269	scaf17	5658645	5673879	-	477	-	-	-	-	-	-	-	-
BGIBMGA005717	1033.31	1388.31	678.313	0.48859	-1.0333	0.000406575	0.0037711	scaf120	50207	57254	-	1251	-	GO:0005737;GO:0005737;GO:0016787;GO:0016787;GO:0016810;GO:0016810;	-	-	-	-	-	-
BGIBMGA005080	15.1414	27.0498	3.23308	0.119523	-3.06464	0.000408371	0.00378502	scaf32	1329255	1339451	-	1722	-	-	-	-	-	-	-	-
BGIBMGA003705	54.992	80.7622	29.2217	0.361824	-1.46664	0.000416233	0.00384126	scaf9	5598857	5602609	+	1950	-	GO:0003676;GO:0003676;	-	-	-	-	-	-
BGIBMGA001151	27.9056	45.2392	10.572	0.233691	-2.09733	0.000437895	0.0040009	scaf1	6335567	6338393	+	762	-	GO:0016020;GO:0016021;GO:0016021;	-	-	-	-	-	-
BGIBMGA013655	88.4481	122.826	54.0699	0.440215	-1.18372	0.000483707	0.00436663	scaf162	33869	46908	-	1644	-	GO:0005515;	-	-	-	-	-	-
BGIBMGA004665	397.008	661.846	132.17	0.199699	-2.3241	0.000491334	0.00442615	scaf135	284105	284491	+	387	-	-	-	-	-	-	-	-
BGIBMGA000895	53.4892	78.6295	28.349	0.360539	-1.47177	0.000514936	0.0046033	scaf1	11143401	11149906	-	2121	-	-	-	-	-	-	-	-
BGIBMGA001528	347.147	506.567	187.727	0.370587	-1.43212	0.000531494	0.00473476	scaf7	3087089	3091476	+	1998	-	-	-	-	-	-	-	-
BGIBMGA010075	32.9974	51.8427	14.1522	0.272983	-1.87312	0.000532436	0.00473986	scaf45	1508538	1509539	+	1002	-	-	-	-	-	-	-	-
BGIBMGA006070	27.3983	47.1998	7.59678	0.160949	-2.63532	0.000540916	0.00480203	scaf5	492443	499787	-	939	-	GO:0005623;GO:0005623;GO:0045454;GO:0045454;	-	-	-	-	-	-
BGIBMGA010456	81.2594	112.971	49.5475	0.438585	-1.18907	0.000554316	0.0049108	scaf6	1331788	1331997	-	210	-	-	-	-	-	-	-	-
BGIBMGA005447	161.07	215.796	106.345	0.492801	-1.02092	0.000558534	0.00494135	scaf19	2158840	2167161	+	1761	-	GO:0006508;GO:0006751;GO:0006751;GO:0016020;GO:0016021;GO:0016021;GO:0036374;GO:0036374;	-	-	-	-	-	-
BGIBMGA002153	1455.2	1984.26	926.14	0.466742	-1.0993	0.000584803	0.00514538	scaf64	2149395	2152397	-	525	-	-	-	-	-	-	-	-
BGIBMGA009887	24.2117	39.7308	8.69263	0.218788	-2.19239	0.000588247	0.00515801	scaf51	1046943	1048619	+	1233	-	GO:0004930;GO:0004930;GO:0007186;GO:0007186;GO:0016020;GO:0016021;GO:0016021;GO:0016021;GO:0016500;GO:0016500;	-	-	-	-	-	-
BGIBMGA002163	81.338	130.96	31.716	0.24218	-2.04585	0.000593199	0.00518726	scaf64	1896803	1900218	-	1137	-	-	-	-	-	-	-	-
BGIBMGA013639	573.911	777.311	370.51	0.476656	-1.06898	0.00064868	0.00561688	scaf78	1148852	1159587	+	1095	-	GO:0016020;GO:0016021;GO:0016021;	-	-	-	-	-	-
BGIBMGA006288	29.2144	46.4586	11.9703	0.257656	-1.95648	0.000648893	0.00561688	scaf49	218166	219563	-	1398	-	GO:0016020;GO:0016021;GO:0016021;	-	-	-	-	-	-
BGIBMGA006873	1067.68	1611.48	523.879	0.325093	-1.62108	0.000740802	0.00627701	scaf70	1316194	1330235	+	2223	-	GO:0005515;GO:0016020;GO:0016021;GO:0016021;	-	-	-	-	-	-
BGIBMGA006461	3111.04	4561.39	1660.69	0.364076	-1.45769	0.00079312	0.00659409	scaf11	1088208	1106736	+	4998	-	GO:0004672;GO:0004672;GO:0005524;GO:0005524;GO:0006468;GO:0006468;	-	-	-	-	-	-
BGIBMGA003680	341.889	504.794	178.985	0.354571	-1.49585	0.000797255	0.00662419	scaf9	3941440	3944628	+	1122	-	GO:0046872;GO:0046872;GO:0046872;	-	-	-	-	-	-
BGIBMGA010255	85.4511	117.705	53.1972	0.451953	-1.14576	0.000830697	0.00686207	scaf15	3588370	3598887	+	522	-	-	-	-	-	-	-	101746867
BGIBMGA002440	22.2954	36.9048	7.68603	0.208266	-2.2635	0.000833761	0.00687519	scaf14	792351	796956	-	1371	-	-	-	-	-	-	-	-
BGIBMGA006332	29.5378	46.8028	12.2728	0.262225	-1.93112	0.000834814	0.00687712	scaf49	2128602	2143628	+	2022	-	-	-	-	-	-	-	-
BGIBMGA002952	486.255	652.059	320.452	0.491447	-1.02489	0.000852444	0.00697439	scaf13	6302371	6316979	-	5088	-	GO:0005509;GO:0005509;GO:0005886;GO:0005886;GO:0005886;GO:0007155;GO:0007155;GO:0007155;GO:0007156;GO:0007156;GO:0016020;GO:0016020;GO:0016020;GO:0016021;GO:0016021;	-	-	-	-	-	-
BGIBMGA001742	582.358	831.683	333.032	0.400432	-1.32037	0.000920639	0.00742352	scaf35	849609	861673	+	1017	-	GO:0005484;GO:0005484;GO:0005622;GO:0005622;GO:0006886;GO:0006886;GO:0016020;GO:0016020;GO:0016192;GO:0016192;GO:0061025;	-	-	-	-	-	-
BGIBMGA007447	80.1595	125.772	34.5474	0.274684	-1.86416	0.00094401	0.00757865	scaf102	1102914	1106184	-	2157	-	GO:0016620;GO:0016620;GO:0055114;GO:0055114;	-	-	-	-	-	-
BGIBMGA003791	157.43	209.919	104.942	0.499914	-1.00025	0.000945616	0.0075868	scaf91	839519	850971	+	867	-	GO:0016020;GO:0016021;GO:0016021;	K18264	-	-	-	-	101739397
BGIBMGA012587	64.0054	90.4881	37.5226	0.414669	-1.26997	0.000950298	0.00761009	scaf100	832887	839146	-	1158	-	GO:0016020;GO:0016021;GO:0016021;GO:0016021;GO:0022857;GO:0022857;GO:0055085;GO:0055085;	-	-	-	-	-	-
BGIBMGA006083	33.4115	51.7087	15.1142	0.292294	-1.77451	0.000964873	0.00771368	scaf5	64503	65369	-	867	-	-	K00079	-	-	-	-	101742796
BGIBMGA000891	64.2665	94.9922	33.5408	0.35309	-1.50189	0.000967281	0.00772201	scaf1	11339969	11352405	-	1620	-	GO:0004888;GO:0004888;GO:0005216;GO:0005216;GO:0005230;GO:0005230;GO:0005886;GO:0005886;GO:0006811;GO:0006811;GO:0006811;GO:0016020;GO:0016021;GO:0016021;GO:0016021;GO:0034220;GO:0034220;	-	-	-	-	-	-
BGIBMGA009942	78.2784	108.194	48.3624	0.446995	-1.16167	0.00097274	0.00776076	scaf137	327743	332712	+	2412	-	-	-	-	-	-	-	-
BGIBMGA008092	146.534	205.18	87.8883	0.428347	-1.22315	0.000994589	0.00793015	scaf87	1062697	1067825	-	480	-	GO:0003677;GO:0003700;GO:0003700;GO:0005634;GO:0005634;GO:0006351;GO:0006355;GO:0006355;GO:0043565;GO:0043565;	K09408	-	-	-	Fkhr [Source:UniProtKB/TrEMBL;Acc:E9JEH6]"	100529235
BGIBMGA006438	79.9744	110.198	49.7508	0.451468	-1.14731	0.00101651	0.00808481	scaf11	687688	690182	-	441	-	-	-	-	-	-	-	-
BGIBMGA013570	6.23049	12.461	0	0	-Inf	0.00104157	0.00824328	scaf130	498345	499074	+	657	-	-	-	-	-	-	-	101743261
BGIBMGA009825	140.586	199.189	81.9825	0.411582	-1.28075	0.00104895	0.00829145	scaf51	2582891	2586037	-	1074	-	GO:0005515;	-	-	-	-	-	-
BGIBMGA000850	74.9895	104.111	45.8681	0.44057	-1.18256	0.00108859	0.00856263	scaf1	14482149	14492948	-	1302	-	GO:0005515;	-	-	-	-	-	-
BGIBMGA003639	37.6316	57.0499	18.2134	0.319254	-1.64722	0.00113577	0.00884699	scaf9	2171470	2193358	+	3450	-	-	-	-	-	-	-	-
BGIBMGA001592	55.8039	98.7648	12.8431	0.130037	-2.94301	0.0011615	0.0090201	scaf7	7120141	7123385	+	858	-	GO:0042626;GO:0042626;GO:0055085;	K02149	-	-	-	Vacuolar ATP synthase subunit D[Source:UniProtKB/TrEMBL;Acc:Q1HPT6]	733120
BGIBMGA012238	8.96841	16.9748	0.961986	0.0566713	-4.14124	0.00116956	0.00907171	scaf26	3473265	3487282	-	1404	-	GO:0003824;GO:0003824;GO:0005975;GO:0005975;GO:0016853;GO:0016853;GO:0030246;GO:0030246;	-	-	-	-	-	-
BGIBMGA000884	79.0063	109.323	48.6897	0.445376	-1.1669	0.00117263	0.00908675	scaf1	12100205	12103811	-	495	-	-	-	-	-	-	-	-
BGIBMGA012339	89.941	121.999	57.8831	0.474456	-1.07565	0.00123075	0.00947193	scaf26	2567395	2617096	+	6021	-	-	-	-	-	-	-	-
BGIBMGA000981	89.7219	142.268	37.1755	0.261306	-1.93619	0.0012581	0.00964768	scaf1	7187070	7201251	-	3783	-	GO:0003676;GO:0003676;GO:0016020;GO:0016021;GO:0016021;GO:0046872;GO:0046872;	-	-	-	-	-	-
BGIBMGA013128	63.739	96.1636	31.3143	0.325636	-1.61867	0.00126251	0.00966995	scaf124	167050	171851	-	4449	-	-	-	-	-	-	-	-
BGIBMGA010500	49.9886	72.7241	27.2531	0.374747	-1.41601	0.00127117	0.0097217	scaf6	268812	278566	+	1590	-	GO:0042302;GO:0042302;GO:0042302;	-	-	-	-	-	-
BGIBMGA002785	9.94689	18.4954	1.39836	0.0756055	-3.72536	0.00127401	0.009729	scaf30	3138892	3155307	-	2154	-	GO:0005515;GO:0005622;GO:0005622;GO:0035556;GO:0035556;	-	-	-	-	-	-
BGIBMGA003512	57.3415	82.0149	32.6681	0.398319	-1.328	0.00127945	0.00975318	scaf9	4068774	4074436	-	1509	-	GO:0004553;GO:0004553;GO:0005975;GO:0005975;GO:0008152;GO:0016787;GO:0016798;	-	-	-	-	-	-
BGIBMGA014336	52.2441	77.5822	26.906	0.346807	-1.5278	0.00132843	0.0100518	scaf1661	160	2650	+	483	-	GO:0005515;	-	-	-	-	-	-
BGIBMGA001210	2567.27	3761.16	1373.39	0.365152	-1.45343	0.00133361	0.0100822	scaf1	9530481	9532457	+	1551	-	GO:0003677;GO:0003677;GO:0003677;GO:0005515;GO:0005634;GO:0005634;	-	-	-	-	-	101743032
BGIBMGA013455	35.3951	53.7075	17.0828	0.31807	-1.65258	0.00133892	0.0101164	scaf111	19696	21765	-	474	-	GO:0016020;GO:0016021;GO:0016021;GO:0016021;GO:0055085;GO:0055085;	-	-	-	-	-	-
BGIBMGA000378	25.8455	41.0744	10.6166	0.258473	-1.95192	0.00134289	0.0101283	scaf18	987747	1017562	+	2340	-	-	-	-	-	-	-	-
BGIBMGA004708	651.904	915.322	388.486	0.424426	-1.23642	0.00134366	0.0101283	scaf108	340736	342265	+	1530	-	GO:0006629;GO:0006629;	K01052	EC:3.1.1.13	-	-	Acid lipase-2[Source:UniProtKB/TrEMBL;Acc:H9J5B8]	101739402
BGIBMGA013177	20.9288	34.3848	7.47277	0.217328	-2.20206	0.00137735	0.0103458	scaf39	1861841	1862104	-	264	-	-	-	-	-	-	-	-
BGIBMGA009400	18.5353	31.0855	5.98517	0.192539	-2.37678	0.00143329	0.010675	scaf81	602691	605079	-	423	-	GO:0003824;GO:0003824;	-	-	-	-	-	-
BGIBMGA014457	48.3768	70.5963	26.1573	0.370519	-1.43238	0.00144244	0.0107219	scaf264	34621	35991	+	501	-	-	-	-	-	-	-	-
BGIBMGA007829	57.7987	82.3591	33.2383	0.403578	-1.30908	0.00146386	0.0108371	scaf3	2498958	2504482	+	1101	-	GO:0016020;GO:0016021;GO:0016021;	-	-	-	-	-	-
BGIBMGA013163	84.1838	113.976	54.3921	0.477227	-1.06725	0.00152658	0.0112045	scaf39	2961971	2969064	-	552	BMORCPR56	GO:0042302;GO:0042302;GO:0042302;	-	-	-	-	Putative cuticle protein[Source:UniProtKB/TrEMBL;Acc:C0H6P8]	100379415
BGIBMGA013687	36.8115	67.5932	6.02979	0.089207	-3.4867	0.00153362	0.0112498	scaf160	204653	205486	-	834	C/EBP	GO:0003700;GO:0003700;GO:0006355;GO:0006355;	K10052	-	-	-	Chorion specific C/EBP[Source:UniProtKB/TrEMBL;Acc:Q38Q34]	692780
BGIBMGA004894	33.5505	55.3093	11.7918	0.213198	-2.22973	0.0015948	0.0116057	scaf144	98463	109641	+	1641	-	-	-	-	-	-	-	-
BGIBMGA008657	83.3114	112.89	53.7327	0.475973	-1.07105	0.00161941	0.0117581	scaf132	575927	576373	+	375	-	-	-	-	-	-	-	-
BGIBMGA010410	64.1141	89.6989	38.5292	0.429539	-1.21914	0.00163498	0.0118577	scaf6	4584829	4593398	-	735	-	-	-	-	-	-	-	-
BGIBMGA009621	15.0335	26.0504	4.01657	0.154185	-2.69727	0.00166886	0.012058	scaf103	1003421	1005365	+	1311	-	GO:0005576;GO:0005576;	-	-	-	-	30K protein 23[Source:UniProtKB/TrEMBL;Acc:H9JJC0]	101746760
BGIBMGA006179	62.566	87.8772	37.2549	0.423943	-1.23806	0.00169259	0.0121933	scaf5	6055430	6074743	+	2142	-	GO:0006508;GO:0006508;GO:0008236;GO:0008236;	-	-	-	-	-	-
BGIBMGA012699	1559.49	2327.33	791.655	0.340156	-1.55573	0.00172071	0.012347	scaf69	691978	700845	+	5823	-	GO:0006211;GO:0070579;GO:0080111;	-	-	-	-	-	-
BGIBMGA009019	57.0296	82.9233	31.1358	0.375478	-1.4132	0.00180147	0.0128689	scaf17	4483296	4493666	+	1713	-	GO:0005272;GO:0005272;GO:0005272;GO:0006811;GO:0006814;GO:0006814;GO:0006814;GO:0016020;GO:0016020;GO:0016020;GO:0016021;GO:0016021;GO:0035725;	-	-	-	-	-	-
BGIBMGA011909	72.3184	99.4727	45.164	0.454034	-1.13913	0.00182513	0.0130163	scaf59	1750526	1751662	-	558	-	-	-	-	-	-	-	-
BGIBMGA003966	11.448	20.5802	2.31572	0.112522	-3.15173	0.00187701	0.0132976	scaf36	4112702	4116466	-	339	-	-	-	-	-	-	-	-
BGIBMGA008245	390.359	530.71	250.009	0.471084	-1.08594	0.00190352	0.0134114	scaf94	557880	558541	-	264	-	GO:0005198;GO:0005198;GO:0031012;GO:0031012;	-	-	-	-	-	-
BGIBMGA011048	14.0981	24.6159	3.5802	0.145443	-2.78148	0.0019151	0.0134707	scaf31	94749	96920	-	2172	-	-	-	-	-	-	-	-
BGIBMGA014011	30.0401	46.4537	13.6266	0.293337	-1.76937	0.00196815	0.0138061	scaf29	4040525	4050632	+	969	-	GO:0005507;GO:0005507;GO:0016491;GO:0016491;GO:0016491;GO:0046872;GO:0055114;GO:0055114;GO:0055114;	-	-	-	-	-	-
BGIBMGA007370	20.2761	33.2133	7.3389	0.220963	-2.17813	0.00196941	0.0138063	scaf55	701724	702807	-	357	-	-	-	-	-	-	-	-
BGIBMGA003349	59.6747	83.8845	35.4648	0.422781	-1.24202	0.00197153	0.0138072	scaf42	1014613	1018676	-	1722	-	GO:0003676;GO:0003676;GO:0005615;GO:0005615;GO:0008168;GO:0008168;GO:0032259;GO:0032259;	-	-	-	-	-	-
BGIBMGA009993	47.9249	69.2908	26.5589	0.383296	-1.38347	0.00197821	0.0138401	scaf170	70214	71137	-	924	-	GO:0016020;GO:0016021;GO:0016021;GO:0032456;	-	-	-	-	-	-
BGIBMGA006901	53.5998	76.5447	30.6549	0.400483	-1.32019	0.00202249	0.0141072	scaf44	2271815	2275763	-	753	-	-	K14443	-	-	-	-	101744020
BGIBMGA007713	19.4491	32.0849	6.81329	0.212352	-2.23547	0.00202806	0.014123	scaf3	2243267	2252679	-	297	-	GO:0016020;GO:0016021;GO:0016021;	-	-	-	-	-	-
BGIBMGA005695	19.3638	31.8697	6.85791	0.215186	-2.21635	0.00205229	0.0142407	scaf143	419414	420847	-	1434	-	-	-	-	-	-	Acid lipase-1[Source:UniProtKB/TrEMBL;Acc:H9J853]	-
BGIBMGA006686	835.911	1169.91	501.917	0.429023	-1.22087	0.00206229	0.0142946	scaf10	1810409	1815624	+	2598	-	GO:0001104;GO:0003712;GO:0003712;GO:0005634;GO:0006351;GO:0006357;GO:0006357;GO:0016592;GO:0016592;	-	-	-	-	-	-
BGIBMGA002531	49.272	70.9884	27.5556	0.388171	-1.36524	0.00206897	0.0143254	scaf14	5203566	5213879	+	462	-	GO:0006508;GO:0006508;GO:0008237;GO:0008237;GO:0008241;GO:0008241;GO:0016020;GO:0016020;GO:0016020;GO:0016021;GO:0016021;	-	-	-	-	-	-
BGIBMGA013477	251.879	357.088	146.669	0.410736	-1.28372	0.00208341	0.0144098	scaf111	951520	954802	+	1869	-	GO:0016020;GO:0016021;GO:0016021;GO:0016021;GO:0022857;GO:0022857;GO:0055085;GO:0055085;	-	-	-	-	-	-
BGIBMGA007259	67.2031	93.8637	40.5425	0.431929	-1.21113	0.00211309	0.0145525	scaf92	1393289	1395059	-	735	-	GO:0016491;GO:0016491;GO:0055114;	-	-	-	-	-	-
BGIBMGA008832	13.7493	24.7019	2.79671	0.113218	-3.14282	0.00213594	0.0146862	scaf113	675155	680987	+	1398	-	GO:0000943;GO:0000943;GO:0003676;GO:0003676;GO:0008270;GO:0008270;	-	-	-	-	-	-
BGIBMGA009401	155.979	242.381	69.5758	0.287051	-1.80062	0.00215081	0.0147647	scaf81	574816	589067	-	3273	-	-	-	-	-	-	-	-
BGIBMGA010546	44.1866	64.1746	24.1986	0.377074	-1.40708	0.00221359	0.015139	scaf6	4916009	4929651	+	1131	-	GO:0004252;GO:0004252;GO:0006508;GO:0006508;GO:0006508;GO:0008233;GO:0008236;GO:0016787;	-	-	-	-	-	-
BGIBMGA014612	199.864	270.043	129.685	0.480239	-1.05818	0.00225007	0.0153476	scaf590	7410	10581	-	2424	-	GO:0003676;GO:0003676;	-	-	-	-	-	-
BGIBMGA008299	12.9036	22.7081	3.09921	0.136481	-2.87323	0.00230106	0.0156289	scaf2	10766123	10767320	-	1104	-	-	-	-	-	-	-	-
BGIBMGA001424	32.2852	48.9306	15.6398	0.319632	-1.64552	0.00236446	0.0160088	scaf7	4976559	4976897	-	339	-	-	-	-	-	-	-	-
BGIBMGA012466	186.412	268.691	104.133	0.387557	-1.36752	0.00237087	0.0160437	scaf56	1309903	1328322	-	1704	-	-	-	-	-	-	-	-
BGIBMGA000246	6.33806	12.6761	0	0	-Inf	0.00238589	0.0161368	scaf18	3569250	3576697	-	474	BMORCPR129	GO:0042302;GO:0042302;GO:0042302;	-	-	-	-	Putative cuticle protein[Source:UniProtKB/TrEMBL;Acc:C0H6X1]	100379350
BGIBMGA005848	50.3252	71.5526	29.0977	0.406662	-1.2981	0.00247449	0.0166309	scaf125	96637	99746	-	537	-	GO:0016020;GO:0016021;GO:0016021;GO:0016021;GO:0033227;GO:0033227;GO:0051033;GO:0051033;	-	-	-	-	-	-
BGIBMGA002231	64.7805	91.7358	37.8251	0.412327	-1.27814	0.00251812	0.01688	scaf34	4108264	4123983	-	1419	-	GO:0005515;	-	-	-	-	-	-
BGIBMGA006836	28.1294	43.4604	12.7985	0.294485	-1.76373	0.00254648	0.0170256	scaf70	217355	217555	-	201	-	GO:0016020;GO:0016021;GO:0016021;	-	-	-	-	-	-
BGIBMGA002851	3158.03	4504.68	1811.38	0.402111	-1.31433	0.00257218	0.0171776	scaf30	7111	9775	+	1770	-	GO:0004888;GO:0004888;GO:0004930;GO:0004930;GO:0007166;GO:0007166;GO:0007186;GO:0007186;GO:0016020;GO:0016021;GO:0016021;GO:0016021;	K04599	-	-	-	-	101745169
BGIBMGA006578	37.8088	56.0505	19.5671	0.349098	-1.5183	0.0025788	0.0171899	scaf10	5339948	5343868	-	366	-	GO:0004888;GO:0004888;GO:0005216;GO:0005216;GO:0005230;GO:0005230;GO:0006811;GO:0006811;GO:0016021;GO:0016021;GO:0034220;GO:0034220;	-	-	-	-	-	-
BGIBMGA005351	2171.09	3301.74	1040.44	0.31512	-1.66603	0.00272681	0.0179877	scaf19	2603466	2627154	-	3564	-	GO:0005089;GO:0005089;GO:0035023;GO:0035023;	-	-	-	-	-	-
BGIBMGA003703	79.227	106.502	51.9524	0.487808	-1.03561	0.00274156	0.0180665	scaf9	5472627	5482036	+	3630	-	GO:0005515;	-	-	-	-	-	-
BGIBMGA008877	12.7315	22.2299	3.23308	0.145438	-2.78152	0.00277603	0.0182374	scaf17	3819165	3821311	-	690	-	-	-	-	-	-	-	-
BGIBMGA012146	18.9478	31.1715	6.72404	0.215711	-2.21283	0.00284526	0.0186089	scaf75	1263275	1273259	-	915	BMORCPR48	GO:0042302;GO:0042302;GO:0042302;	-	-	-	-	Putative cuticle protein[Source:UniProtKB/TrEMBL;Acc:C0H6P0]	100379423
BGIBMGA012526	1882.16	2629.75	1134.56	0.431434	-1.21279	0.00292792	0.0190949	scaf77	1554877	1562708	-	1317	-	GO:0003824;GO:0003824;GO:0008483;GO:0008483;GO:0030170;GO:0030170;	-	-	-	-	-	-
BGIBMGA007697	943.982	1400.33	487.631	0.348225	-1.52191	0.00296212	0.0192628	scaf3	4387186	4387992	-	807	-	GO:0043565;GO:0043565;	-	-	-	-	-	101736485
BGIBMGA004554	62.8293	87.0499	38.6086	0.443523	-1.17292	0.0029723	0.0192996	scaf48	1481797	1489257	-	1089	-	GO:0006281;GO:0006281;GO:0019104;GO:0019104;	-	-	-	-	-	-
BGIBMGA009296	59.2648	82.45	36.0796	0.437594	-1.19233	0.00297919	0.0193248	scaf38	3169607	3170020	+	225	-	-	-	-	-	-	-	-
BGIBMGA007365	20.954	33.5624	8.34551	0.248656	-2.00777	0.00305995	0.019739	scaf55	1158943	1168708	-	1326	-	GO:0004252;GO:0004252;GO:0006508;GO:0006508;	-	-	-	-	-	-
BGIBMGA002793	90.9127	137.276	44.5492	0.324522	-1.62361	0.00313255	0.0201264	scaf30	2773007	2775298	-	1542	-	GO:0003756;GO:0003756;GO:0005783;GO:0005783;GO:0016671;GO:0016671;GO:0055114;GO:0055114;	-	-	-	-	-	-
BGIBMGA006449	90.3687	132.241	48.4962	0.366726	-1.44723	0.00318872	0.020426	scaf11	425282	427563	+	537	-	-	-	-	-	-	-	-
BGIBMGA002758	22.8438	36.2115	9.47613	0.261689	-1.93408	0.00319984	0.0204767	scaf146	42278	48246	-	441	-	GO:0005509;GO:0005509;	-	-	-	-	-	-
BGIBMGA009059	38.4364	56.7008	20.1721	0.355764	-1.49101	0.00326897	0.020805	scaf63	1395948	1410764	-	1917	-	GO:0016020;GO:0016021;GO:0016021;	-	-	-	-	-	-
BGIBMGA000755	22.1052	35.126	9.08438	0.258622	-1.95108	0.00334005	0.0211735	scaf89	1185359	1186051	-	693	-	-	-	-	-	-	-	101736091
BGIBMGA013746	33.2426	49.7149	16.7704	0.337332	-1.56776	0.00336656	0.0212994	scaf47	2387909	2391158	-	873	-	GO:0004252;GO:0006508;	-	-	-	-	-	-
BGIBMGA006299	152.614	215.772	89.4553	0.414583	-1.27027	0.00350157	0.0220125	scaf49	581009	586212	+	813	-	-	-	-	-	-	-	-
BGIBMGA014250	55.4973	78.1034	32.8912	0.421124	-1.24768	0.00352366	0.0221189	scaf80	181535	195382	-	1449	-	-	-	-	-	-	-	-
BGIBMGA005337	13.2095	22.7941	3.62483	0.159025	-2.65268	0.00356842	0.0223453	scaf19	3707291	3733688	-	3030	-	GO:0005515;	-	-	-	-	-	-
BGIBMGA007533	16.4045	27.394	5.41493	0.197668	-2.33885	0.0035777	0.0223912	scaf66	614742	627626	-	1689	-	-	-	-	-	-	-	-
BGIBMGA010600	56.6141	97.7224	15.5059	0.158673	-2.65587	0.00363413	0.0226683	scaf234	17089	20491	+	678	-	GO:0005576;GO:0005576;GO:0052689;GO:0052689;	-	-	-	-	-	-
BGIBMGA001059	10.6431	19.0596	2.22647	0.116816	-3.09769	0.0036738	0.0228713	scaf1	1716839	1725401	-	1185	-	-	-	-	-	-	-	-
BGIBMGA005054	57.786	80.2312	35.3408	0.440487	-1.18283	0.0036845	0.0228946	scaf32	2620231	2620428	-	198	-	-	-	-	-	-	-	-
BGIBMGA002949	36.9385	54.4438	19.4332	0.356941	-1.48624	0.00371263	0.0230185	scaf13	6635849	6637165	-	1317	-	GO:0005509;GO:0005509;GO:0007156;GO:0007156;GO:0016020;GO:0016020;	-	-	-	-	-	-
BGIBMGA002506	42.8182	61.4825	24.1539	0.392858	-1.34792	0.00386632	0.0237701	scaf14	3187299	3194489	+	918	-	GO:0004930;GO:0004930;GO:0004930;GO:0004995;GO:0004995;GO:0005886;GO:0005886;GO:0007165;GO:0007186;GO:0007186;GO:0007186;GO:0007217;GO:0016020;GO:0016021;GO:0016021;GO:0016021;	-	-	-	-	-	-
BGIBMGA012326	25.3454	39.2908	11.4001	0.290147	-1.78514	0.00397439	0.0242792	scaf26	1798935	1800909	+	435	-	-	-	-	-	-	-	-
BGIBMGA011393	95.8959	130.462	61.3294	0.470093	-1.08898	0.00397561	0.0242792	scaf12	5089761	5122946	+	2478	-	GO:0004672;GO:0004672;GO:0005524;GO:0005524;GO:0006468;GO:0006468;	-	-	-	-	-	-
BGIBMGA012756	22.359	36.6848	8.03315	0.218978	-2.19114	0.00407241	0.0247973	scaf4	8907164	8924248	-	1644	-	GO:0016020;GO:0016021;GO:0016021;	-	-	-	-	-	-
BGIBMGA006383	9.62315	17.367	1.87935	0.108214	-3.20804	0.00407885	0.024813	scaf11	3921734	3926719	-	2349	-	-	-	-	-	-	-	-
BGIBMGA001971	57.9818	80.107	35.8565	0.447608	-1.15969	0.00435914	0.0261854	scaf28	3784515	3787475	+	168	-	-	-	-	-	-	-	-
BGIBMGA001173	14.5822	24.4438	4.72068	0.193124	-2.3724	0.00436907	0.0262328	scaf1	7658744	7660746	+	957	-	GO:0003676;GO:0003676;GO:0016787;GO:0016787;GO:0046872;GO:0046872;	-	-	-	-	-	-
BGIBMGA013910	76.8325	102.595	51.0698	0.49778	-1.00642	0.00437749	0.0262588	scaf29	2504887	2516579	-	1626	-	GO:0006629;GO:0006629;GO:0006629;GO:0016042;GO:0016042;GO:0016787;GO:0016787;	-	-	-	-	-	-
BGIBMGA004237	10.4271	18.5384	2.31572	0.124914	-3.00099	0.00452605	0.026941	scaf150	301542	301802	-	261	-	-	-	-	-	-	-	-
BGIBMGA013912	22.799	35.8193	9.77863	0.272998	-1.87304	0.00478668	0.0282124	scaf29	2295587	2306766	-	1173	-	-	-	-	-	-	-	-
BGIBMGA011000	17.0133	28.5225	5.50418	0.192977	-2.3735	0.00481375	0.0283329	scaf83	1323535	1328371	+	1209	-	GO:0004046;GO:0004046;GO:0005737;GO:0005737;GO:0006508;GO:0006508;GO:0006520;GO:0006520;GO:0008237;GO:0008237;GO:0016787;GO:0016787;	K14677	EC:3.5.1.14	-	-	-	101742389
BGIBMGA013568	4.92748	9.85496	0	0	-Inf	0.00487516	0.0285765	scaf130	405323	405795	+	390	-	-	-	-	-	-	-	-
BGIBMGA006176	22.1066	34.6479	9.56537	0.276074	-1.85687	0.0050114	0.0292283	scaf5	5881760	5886548	+	1167	-	GO:0003993;GO:0003993;GO:0016311;	K19283	-	-	-	-	101745576
BGIBMGA006938	46.4349	71.1556	21.7142	0.305165	-1.71234	0.00509966	0.0296756	scaf44	789848	790033	+	186	-	-	-	-	-	-	-	-
BGIBMGA011886	48.0603	67.603	28.5176	0.42184	-1.24523	0.00515775	0.0299302	scaf59	2243562	2255912	-	1914	-	GO:0004601;GO:0004601;GO:0006979;GO:0006979;GO:0020037;GO:0020037;GO:0042600;GO:0042600;GO:0055114;GO:0055114;GO:0098869;	-	-	-	-	-	-
BGIBMGA009065	19.385	31.1285	7.6414	0.245479	-2.02633	0.00516156	0.0299302	scaf63	1165722	1170415	-	3069	-	GO:0005515;	-	-	-	-	-	-
BGIBMGA005602	21.4541	33.7345	9.17363	0.271936	-1.87866	0.0052176	0.0301976	scaf33	97098	102123	+	1482	-	GO:0004553;GO:0004553;GO:0005975;GO:0005975;	-	-	-	-	-	-
BGIBMGA011241	622.917	845.725	400.109	0.473096	-1.07979	0.0053333	0.0307978	scaf12	3253025	3262330	-	2031	-	-	-	-	-	-	-	-
BGIBMGA004426	372.961	526.528	219.393	0.41668	-1.26299	0.00535919	0.0309195	scaf37	350082	356200	-	657	-	GO:0005215;GO:0005215;GO:0016020;GO:0016021;GO:0016021;GO:0016021;GO:0022857;GO:0022857;GO:0055085;GO:0055085;	-	-	-	-	-	-
BGIBMGA008094	253.65	359.824	147.477	0.409861	-1.2868	0.00543222	0.0312545	scaf87	960987	966490	-	1080	-	GO:0003677;GO:0003700;GO:0003700;GO:0005634;GO:0005634;GO:0006351;GO:0006355;GO:0006355;GO:0043565;GO:0043565;	-	-	-	-	-	-
BGIBMGA001862	6.12433	11.7677	0.480993	0.0408741	-4.61267	0.00551496	0.0316334	scaf28	2957160	2958143	-	285	BMORCPG17	-	-	-	-	-	Putative cuticle protein[Source:UniProtKB/TrEMBL;Acc:C0H6E4]	100379507
BGIBMGA008146	17854.6	26427.7	9281.49	0.351203	-1.50962	0.00557542	0.0319175	scaf52	919601	925319	-	771	-	-	-	-	-	-	-	-
BGIBMGA006071	24.0466	36.8618	11.2315	0.304692	-1.71458	0.00560362	0.0320275	scaf5	490389	492049	-	672	-	-	-	-	-	-	-	-
BGIBMGA013126	343.822	491.453	196.192	0.399208	-1.32479	0.0057087	0.0324834	scaf124	184040	194213	-	1173	-	GO:0003676;GO:0003676;	-	-	-	-	-	-
BGIBMGA006138	184.086	255.541	112.632	0.440761	-1.18193	0.00577764	0.0328175	scaf5	3671943	3673818	+	474	-	GO:0003714;GO:0003714;GO:0004672;GO:0004672;GO:0005524;GO:0005524;GO:0006468;GO:0006468;GO:1903507;	-	-	-	-	-	-
BGIBMGA010652	35.9216	52.1869	19.6564	0.376653	-1.40869	0.00593121	0.033453	scaf84	339464	341350	+	1887	-	-	-	-	-	-	-	-
BGIBMGA004276	6993.54	10429.3	3557.77	0.341131	-1.5516	0.00597972	0.0336674	scaf79	1184485	1196931	-	1914	-	GO:0004611;GO:0004611;GO:0004613;GO:0004613;GO:0005525;GO:0005525;GO:0006094;GO:0006094;GO:0017076;GO:0017076;	-	-	-	-	-	-
BGIBMGA009927	63.3757	87.3941	39.3574	0.450343	-1.1509	0.00601391	0.0338154	scaf51	2761975	2768878	+	1227	-	GO:0004888;GO:0004888;GO:0004930;GO:0004930;GO:0004930;GO:0007165;GO:0007166;GO:0007166;GO:0007186;GO:0007186;GO:0007186;GO:0016020;GO:0016020;GO:0016020;GO:0016021;GO:0016021;GO:0016021;	-	-	-	-	-	-
BGIBMGA000881	34.419	50.3221	18.5159	0.367947	-1.44243	0.00610536	0.0342396	scaf1	12336733	12341463	-	927	-	GO:0016020;GO:0016021;GO:0016021;	-	-	-	-	-	105841917
BGIBMGA008524	142.728	252.442	33.0152	0.130783	-2.93475	0.00642692	0.0356696	scaf2	7430858	7447989	+	1776	-	GO:0003824;GO:0003824;GO:0008152;	-	-	-	-	-	101736671
BGIBMGA000385	20.364	32.2139	8.51414	0.2643	-1.91975	0.00643512	0.0356991	scaf18	1228964	1243944	+	894	-	GO:0004252;GO:0004252;GO:0006508;GO:0006508;GO:0006508;GO:0008233;GO:0008236;GO:0016787;	-	-	-	-	-	-
BGIBMGA005984	19.627	31.0425	8.21164	0.264529	-1.9185	0.00674999	0.0369876	scaf5	5709368	5717952	-	1521	-	-	-	-	-	-	-	-
BGIBMGA014445	181.32	268.083	94.5579	0.352719	-1.50341	0.00677033	0.037078	scaf270	38971	42411	-	741	-	-	-	-	-	-	-	-
BGIBMGA012215	67.6634	92.3001	43.0268	0.466162	-1.1011	0.00697244	0.0380226	scaf168	177116	184721	-	705	-	GO:0005515;	-	-	-	-	-	-
BGIBMGA014562	266.709	415.687	117.73	0.283218	-1.82002	0.0071465	0.0387251	scaf442	6464	12182	-	936	-	GO:0005267;GO:0005267;GO:0006811;GO:0016020;GO:0016020;GO:0016020;GO:0016021;GO:0016021;GO:0016021;GO:0071805;GO:0071805;	-	-	-	-	-	-
BGIBMGA006223	32.5993	47.367	17.8315	0.376454	-1.40945	0.00729258	0.0393505	scaf5	8333591	8335162	+	1572	-	-	-	-	-	-	-	105842077
BGIBMGA008195	10.638	20.4032	0.872739	0.0427746	-4.5471	0.00745948	0.0400658	scaf52	2349807	2372199	+	1830	-	GO:0016020;GO:0016021;GO:0016021;	-	-	-	-	-	-
BGIBMGA014356	45.9338	68.8987	22.9688	0.333371	-1.5848	0.00750718	0.0402715	scaf138	470729	471320	-	492	-	-	-	-	-	-	-	-
BGIBMGA010122	36.1669	51.7948	20.539	0.396545	-1.33444	0.00772786	0.0411534	scaf15	3889857	3898166	-	1440	-	GO:0003824;GO:0003824;GO:0016829;GO:0016831;GO:0016831;GO:0019752;GO:0019752;GO:0030170;GO:0030170;	-	-	-	-	-	101735396
BGIBMGA008973	21.3009	33.1703	9.4315	0.284336	-1.81433	0.00783074	0.0414916	scaf17	2154418	2160393	+	1098	-	GO:0004181;GO:0004181;GO:0006508;GO:0006508;GO:0008270;GO:0008270;	-	-	-	-	-	-
BGIBMGA010994	117.104	178.561	55.6468	0.31164	-1.68205	0.00796574	0.0420288	scaf83	671131	671628	+	390	-	GO:0016020;GO:0016021;GO:0016021;	-	-	-	-	-	-
BGIBMGA005993	66.9967	89.4789	44.5144	0.497485	-1.00728	0.00797449	0.0420577	scaf5	5198609	5202303	-	3519	-	GO:0005515;	-	-	-	-	-	-
BGIBMGA013125	292.959	409.964	175.955	0.429197	-1.22029	0.00806019	0.0424052	scaf124	196439	206402	-	1023	-	GO:0003676;GO:0003676;GO:0005634;GO:0005634;GO:0008270;GO:0008270;	-	-	-	-	-	-
BGIBMGA006694	49.5387	68.7696	30.3077	0.440714	-1.18209	0.00825064	0.0433361	scaf10	2381995	2392515	+	2052	-	GO:0005515;GO:0005576;GO:0005576;	-	-	-	-	-	-
BGIBMGA011836	24.8156	40.5913	9.03976	0.222702	-2.16682	0.0084864	0.0442604	scaf16	3135228	3135884	+	657	-	-	-	-	-	-	-	-
BGIBMGA014559	9.64527	16.9748	2.31572	0.136421	-2.87387	0.00867362	0.0449872	BABH01043176	1665	13344	-	1788	-	GO:0004601;GO:0004601;GO:0006979;GO:0006979;GO:0020037;GO:0020037;GO:0055114;GO:0055114;GO:0098869;	-	-	-	-	-	-
BGIBMGA014561	28.1526	41.9398	14.3654	0.342525	-1.54572	0.00873555	0.0452535	scaf517	1418	3261	+	366	-	-	-	-	-	-	-	-
BGIBMGA012464	18.957	30.0049	7.90914	0.263595	-1.92361	0.00882648	0.0456509	scaf56	1416879	1429465	-	1476	-	GO:0005515;	-	-	-	-	-	-
BGIBMGA006676	582.757	1004.6	160.911	0.160173	-2.6423	0.00885899	0.0457822	scaf10	519122	521807	+	1347	-	GO:0004672;GO:0004672;GO:0005524;GO:0005524;GO:0006468;GO:0006468;	-	-	-	-	-	-
BGIBMGA003486	24.216	36.8187	11.6134	0.31542	-1.66466	0.00886467	0.0457931	scaf9	5942396	5947295	-	2673	-	GO:0005515;	-	-	-	-	-	-
BGIBMGA004693	34.3805	49.4518	19.3092	0.390466	-1.35673	0.00896926	0.0462403	scaf108	228305	232801	-	1113	-	-	-	-	-	-	-	-
BGIBMGA012033	9.47077	16.7597	2.18185	0.130184	-2.94137	0.00902491	0.0464526	scaf24	3732513	3738978	-	627	-	GO:0046983;GO:0046983;	K09072	-	-	-	-	101745055
BGIBMGA010961	359.699	583.559	135.839	0.232776	-2.10298	0.00904546	0.0465397	scaf83	1374978	1376447	-	264	-	-	-	-	-	-	-	-
BGIBMGA008374	45.8219	63.6964	27.9474	0.438759	-1.1885	0.00910681	0.046743	scaf2	2793941	2794918	-	978	-	GO:0003676;GO:0003676;	-	-	-	-	-	-
BGIBMGA005234	14.1469	23.3153	4.97856	0.213532	-2.22748	0.00912152	0.0467997	scaf110	337390	338114	+	189	-	-	-	-	-	-	-	-
BGIBMGA005951	40.4928	57.0547	23.9308	0.419436	-1.25348	0.00917411	0.0469699	scaf5	7207918	7208656	-	198	-	-	-	-	-	-	-	-
BGIBMGA007907	33.1169	47.9312	18.3026	0.381852	-1.38891	0.0091749	0.0469699	scaf3	6056119	6061794	+	1881	-	GO:0005515;	-	-	-	-	-	-
BGIBMGA009747	33.097	47.8021	18.3919	0.38475	-1.37801	0.00918358	0.0469867	scaf27	1253238	1265393	+	1461	-	-	-	-	-	-	-	-
BGIBMGA001392	37.7713	53.7936	21.749	0.404304	-1.30649	0.00930408	0.0474708	scaf7	7277036	7277996	-	534	-	GO:0003677;GO:0003677;GO:0004879;GO:0004879;GO:0005634;GO:0005634;GO:0005634;GO:0006351;GO:0006355;GO:0006355;GO:0030522;	-	-	-	-	-	-
BGIBMGA003288	31.9187	46.4967	17.3406	0.372944	-1.42297	0.00933579	0.047569	scaf73	1815800	1819122	+	1026	-	-	-	-	-	-	-	-
BGIBMGA000858	47.7351	66.6848	28.7854	0.431663	-1.21202	0.00933816	0.047569	scaf1	14181243	14200450	-	4068	-	GO:0016020;GO:0016021;GO:0016021;	-	-	-	-	-	-
BGIBMGA011408	632.292	845.553	419.032	0.495572	-1.01283	0.00934979	0.0476094	scaf12	6299570	6316587	+	1086	-	GO:0016020;GO:0016020;GO:0016020;GO:0016021;GO:0016021;	-	-	-	-	-	-
BGIBMGA014381	88.6898	148.862	28.5176	0.191571	-2.38405	0.00962388	0.0487765	scaf155	335220	344332	+	1794	AIF	GO:0016020;GO:0016021;GO:0016021;GO:0016491;GO:0016491;GO:0046983;GO:0046983;GO:0050660;GO:0050660;GO:0055114;GO:0055114;	K04727	EC:1.-.-.-	-	-	AIF [Source:UniProtKB/TrEMBL;Acc:E9JEG6]"	100529220
BGIBMGA013651	7.10201	13.3313	0.872739	0.0654655	-3.93312	0.00962458	0.0487765	scaf162	106130	119397	-	1443	-	GO:0005215;GO:0005215;GO:0016020;GO:0016021;GO:0016021;GO:0016021;GO:0022857;GO:0022857;GO:0055085;GO:0055085;	-	-	-	-	-	-
BGIBMGA010601	28.0235	41.5477	14.4993	0.34898	-1.51878	0.00983107	0.0494842	scaf234	59744	65493	+	900	-	GO:0005576;GO:0005576;GO:0006629;GO:0006629;GO:0052689;GO:0052689;	-	-	-	-	-	-
BGIBMGA011647	6.66686	12.461	0.872739	0.0700377	-3.83572	0.00983616	0.0494842	scaf16	3129836	3131886	-	441	-	-	-	-	-	-	-	-
BGIBMGA007290	29.742	43.6755	15.8084	0.361951	-1.46613	0.0102669	0.0513026	scaf92	750400	755554	+	1083	-	GO:0004970;GO:0004970;GO:0016020;GO:0016020;GO:0016020;GO:0016021;GO:0016021;GO:0035235;	-	-	-	-	-	-
BGIBMGA001905	47.8174	81.919	13.7158	0.167431	-2.57836	0.0103873	0.0517031	scaf28	743112	745131	-	1113	-	GO:0003824;GO:0003824;GO:0005515;GO:0006518;GO:0006518;GO:0016020;GO:0016020;	K18200	EC:4.3.2.5	-	-	-	101742958
BGIBMGA004955	263.759	355.396	172.122	0.484311	-1.04599	0.0109002	0.0534681	scaf65	14157	25964	-	1611	-	GO:0005615;GO:0005615;GO:0016020;GO:0016020;GO:0016020;GO:0016021;GO:0016021;GO:0030001;GO:0030001;GO:0046873;GO:0046873;GO:0055085;GO:0055085;	-	-	-	-	-	-
BGIBMGA006961	9.23408	16.1524	2.31572	0.143366	-2.80222	0.0111074	0.0543597	scaf44	2799647	2820612	+	3318	-	GO:0003700;GO:0003700;GO:0005634;GO:0005634;GO:0006355;GO:0006355;GO:0008270;GO:0008270;	-	-	-	-	-	-
BGIBMGA014367	103.809	149.388	58.2302	0.389792	-1.35922	0.0114502	0.0557824	scaf155	224070	236925	-	2859	-	GO:0003341;GO:0003341;GO:0003777;GO:0003777;GO:0005858;GO:0005858;GO:0007018;GO:0007018;GO:0016020;GO:0016021;GO:0016021;GO:0016887;GO:0016887;GO:0030286;GO:0030286;	-	-	-	-	-	-
BGIBMGA011116	7.47159	13.5894	1.35373	0.0996165	-3.32747	0.0116077	0.0565069	scaf95	804230	818213	-	1497	-	GO:0006629;GO:0006629;GO:0016491;GO:0055114;GO:0080019;GO:0080019;GO:0102965;GO:0102965;	-	-	-	-	-	-
BGIBMGA005091	32.379	46.5446	18.2134	0.39131	-1.35362	0.0116739	0.0567642	scaf32	414961	444746	-	1677	-	GO:0004252;GO:0004252;GO:0006508;GO:0006508;	-	-	-	-	-	-
BGIBMGA000352	5.47161	10.4622	0.480993	0.0459743	-4.44303	0.0119519	0.057726	scaf18	238861	243191	-	1362	-	GO:0005272;GO:0005272;GO:0005272;GO:0006811;GO:0006814;GO:0006814;GO:0006814;GO:0016020;GO:0016020;GO:0016020;GO:0016021;GO:0016021;GO:0035725;	-	-	-	-	-	-
BGIBMGA010757	590.954	844.845	337.064	0.398966	-1.32566	0.0120554	0.0579606	scaf25	912618	926854	-	2004	-	-	-	-	-	-	-	101746596
BGIBMGA002075	24.5258	36.5557	12.496	0.341834	-1.54863	0.012107	0.0581653	scaf23	62293	62999	+	480	-	-	-	-	-	-	-	105842509
BGIBMGA012374	27.478	47.8403	7.11579	0.14874	-2.74913	0.0125855	0.0598824	scaf82	1112929	1120958	-	1725	-	GO:0016614;GO:0016614;GO:0050660;GO:0050660;GO:0055114;GO:0055114;	-	-	-	-	-	-
BGIBMGA012468	59.0116	78.7204	39.3029	0.499272	-1.0021	0.0128066	0.0606554	scaf56	1268620	1291391	-	5589	-	GO:0005634;GO:0005634;GO:0005813;GO:0005813;GO:0060271;GO:0060271;	-	-	-	-	-	-
BGIBMGA002855	16.3864	26.0935	6.67942	0.25598	-1.96589	0.0128096	0.0606554	scaf30	252392	256234	+	993	-	GO:0004252;GO:0004252;GO:0006508;GO:0006508;GO:0006508;GO:0008233;GO:0016020;GO:0016021;GO:0016021;GO:0016021;GO:0016787;	-	-	-	-	-	101745314
BGIBMGA009919	21.1748	32.2139	10.1356	0.314634	-1.66825	0.012911	0.0610766	scaf51	2418897	2419244	+	285	-	-	-	-	-	-	-	-
BGIBMGA009503	21.0258	31.8267	10.2249	0.321267	-1.63816	0.0130635	0.0615487	scaf40	1665481	1686958	+	3123	-	GO:0000166;GO:0005524;GO:0005524;GO:0005524;GO:0016020;GO:0016021;GO:0016021;GO:0016021;GO:0016887;GO:0016887;GO:0042626;GO:0042626;GO:0055085;GO:0055085;	-	-	-	-	-	-
BGIBMGA014477	39.5373	55.2232	23.8514	0.43191	-1.2112	0.013152	0.0618207	scaf280	30528	35860	+	1365	-	-	-	-	-	-	-	-
BGIBMGA014198	8.12413	14.5028	1.74548	0.120355	-3.05463	0.0132309	0.062146	scaf243	12493	25316	-	1488	-	GO:0000166;GO:0000166;GO:0009166;GO:0009166;GO:0016787;GO:0016787;GO:0016787;	-	-	-	-	-	-
BGIBMGA004630	93.8321	153.811	33.8532	0.220096	-2.1838	0.0132766	0.0622922	scaf276	14902	15468	+	567	-	GO:0046872;	K09542	-	-	-	-	101743710
BGIBMGA005322	12.7142	20.8863	4.54219	0.217472	-2.2011	0.0136571	0.0638207	scaf19	4437898	4438440	-	543	-	-	-	-	-	-	-	-
BGIBMGA009238	947.336	1302.9	591.775	0.454199	-1.1386	0.0136787	0.0638522	scaf38	943936	954364	-	2082	-	-	-	-	-	-	-	-
BGIBMGA000456	31.6619	45.3682	17.9555	0.395773	-1.33726	0.0138594	0.0644847	scaf18	4471647	4501363	+	4347	-	GO:0005515;	-	-	-	-	-	-
BGIBMGA005823	145.508	211.339	79.6767	0.377009	-1.40733	0.0139545	0.0648799	scaf54	1799242	1799982	+	741	-	-	-	-	-	-	-	101742822
BGIBMGA000245	35.87	54.7118	17.0283	0.311236	-1.68392	0.0142251	0.065947	scaf18	3596471	3600742	-	513	BMORCPR130	GO:0042302;GO:0042302;GO:0042302;	-	-	-	-	Putative cuticle protein[Source:UniProtKB/TrEMBL;Acc:C0H6X2]	100379349
BGIBMGA010805	43.872	60.0001	27.744	0.462399	-1.11279	0.0151345	0.0690519	scaf25	2328166	2329965	+	603	-	GO:0003677;GO:0003677;GO:0003899;GO:0003899;GO:0006351;GO:0006351;GO:0032549;GO:0032549;	-	-	-	-	-	-
BGIBMGA010300	245.992	378.39	113.594	0.300204	-1.73599	0.0151369	0.0690519	scaf127	127654	131054	-	747	-	GO:0003677;GO:0003677;GO:0003677;GO:0005634;GO:0005634;	-	-	-	-	-	-
BGIBMGA000059	32.1597	45.9374	18.382	0.400154	-1.32137	0.0153875	0.069922	scaf98	1147441	1148233	+	588	-	-	-	-	-	-	-	-
BGIBMGA007888	8.01731	14.1107	1.92397	0.136349	-2.87462	0.0158921	0.0716317	scaf3	4917549	4929115	+	2124	-	GO:0003677;GO:0003677;GO:0003677;GO:0003700;GO:0003700;GO:0003707;GO:0003707;GO:0005634;GO:0005634;GO:0005634;GO:0006351;GO:0006351;GO:0006355;GO:0006355;GO:0006355;GO:0008270;GO:0008270;GO:0043401;GO:0043565;GO:0043565;GO:0046872;	-	-	-	-	-	-
BGIBMGA012683	20.1294	30.6934	9.56537	0.311643	-1.68203	0.0159098	0.0716862	scaf69	683699	683848	-	150	-	-	-	-	-	-	-	-
BGIBMGA006490	12.605	20.6233	4.58681	0.22241	-2.16871	0.0159473	0.0717545	scaf11	3825274	3826613	+	270	-	GO:0016020;GO:0016021;GO:0016021;	-	-	-	-	-	-
BGIBMGA006989	20.021	30.5212	9.52075	0.311938	-1.68067	0.0160317	0.0719326	scaf21	4442165	4461906	-	6387	-	GO:0005576;GO:0005576;GO:0005975;GO:0005975;GO:0006030;GO:0006030;GO:0008061;GO:0008061;	-	-	-	-	-	-
BGIBMGA004206	12.5158	20.6233	4.40832	0.213755	-2.22597	0.0161493	0.0722834	scaf60	2334397	2335797	+	1299	-	GO:0016787;GO:0016787;	-	-	-	-	-	-
BGIBMGA006437	18.4984	28.5274	8.46952	0.296891	-1.752	0.016179	0.072366	scaf11	713228	719436	-	681	-	-	-	-	-	-	-	-
BGIBMGA011666	50.5697	67.9903	33.1491	0.487556	-1.03636	0.0173747	0.0764094	scaf16	2135744	2156034	-	1296	-	GO:0016020;GO:0016021;GO:0016021;	-	-	-	-	-	-
BGIBMGA005561	3156.87	4215.61	2098.13	0.497704	-1.00664	0.0175885	0.0770857	scaf33	2171286	2195440	-	8526	-	GO:0004672;GO:0004672;GO:0005524;GO:0005524;GO:0006468;GO:0006468;	-	-	-	-	-	-
BGIBMGA005190	32.7086	46.1525	19.2646	0.417412	-1.26045	0.0176402	0.0772594	scaf119	401961	432767	-	2859	-	GO:0004435;GO:0004435;GO:0004435;GO:0005509;GO:0005509;GO:0005622;GO:0005622;GO:0006629;GO:0006629;GO:0006629;GO:0007165;GO:0007165;GO:0007165;GO:0008081;GO:0008081;GO:0016042;GO:0016042;GO:0016042;GO:0016787;GO:0035556;GO:0035556;	-	-	-	-	-	-
BGIBMGA009269	1485.68	2015.26	956.101	0.47443	-1.07573	0.0176567	0.077279	scaf38	1380622	1398931	+	3801	-	-	-	-	-	-	-	-
BGIBMGA005880	46.5703	62.9122	30.2283	0.480485	-1.05744	0.0177586	0.0775386	scaf67	1322074	1340939	-	2691	-	GO:0000166;GO:0000166;GO:0000166;GO:0000287;GO:0000287;GO:0000287;GO:0004012;GO:0004012;GO:0004012;GO:0005524;GO:0005524;GO:0005524;GO:0015914;GO:0015914;GO:0016020;GO:0016021;GO:0016021;GO:0016021;GO:0016787;GO:0045332;	-	-	-	-	-	-
BGIBMGA013934	25.9729	47.4482	4.49757	0.0947891	-3.39914	0.0178983	0.0779905	scaf29	490599	499580	-	1503	-	-	-	-	-	-	-	-
BGIBMGA004521	3.75599	7.51199	0	0	-Inf	0.0179347	0.0781226	scaf97	20239	21399	+	1161	NACHRB2	GO:0004888;GO:0004888;GO:0005216;GO:0005216;GO:0005230;GO:0005230;GO:0006811;GO:0006811;GO:0016020;GO:0016021;GO:0016021;GO:0016021;GO:0034220;GO:0034220;	-	-	-	-	Nicotinic acetylcholine receptor beta 3 subunit[Source:UniProtKB/TrEMBL;Acc:A8HTE3]	-
BGIBMGA006432	54.0683	73.1974	34.9392	0.477328	-1.06695	0.0187173	0.0808458	scaf11	832503	834642	-	297	-	-	-	-	-	-	-	-
BGIBMGA013178	30.3001	42.7241	17.8761	0.418409	-1.25702	0.0187686	0.0810403	scaf39	1852027	1859463	-	1113	-	-	-	-	-	-	-	-
BGIBMGA014376	77.7723	113.961	41.5838	0.364896	-1.45444	0.0193559	0.0829904	scaf155	143194	148093	+	693	-	-	-	-	-	-	-	-
BGIBMGA014009	22.721	33.6054	11.8365	0.352219	-1.50546	0.0195312	0.0835462	scaf29	4010802	4015362	+	1038	-	GO:0005507;GO:0005507;GO:0055114;GO:0055114;	-	-	-	-	-	-
BGIBMGA007178	438.647	586.445	290.849	0.495952	-1.01173	0.0195756	0.0836804	scaf74	144657	147404	-	963	-	-	-	-	-	-	-	-
BGIBMGA006746	18.8911	28.7425	9.03976	0.314508	-1.66883	0.0199059	0.0846791	scaf10	4842377	4844106	+	801	-	GO:0005507;GO:0005507;GO:0016491;GO:0016491;GO:0016491;GO:0046872;GO:0055114;GO:0055114;GO:0055114;	-	-	-	-	-	105842235
BGIBMGA000625	36.4984	50.3651	22.6316	0.44935	-1.15409	0.0201028	0.08514	scaf8	1047536	1053522	+	558	-	-	-	-	-	-	-	-
BGIBMGA010913	15.6955	24.4438	6.94716	0.284209	-1.81497	0.0202958	0.0855935	scaf68	1991982	1996457	-	1122	-	GO:0042302;GO:0042302;GO:0042302;	-	-	-	-	-	-
BGIBMGA002556	32.9028	46.2385	19.5671	0.423178	-1.24066	0.0204179	0.0859077	scaf14	6748945	6753694	+	1482	-	GO:0004888;GO:0004888;GO:0005216;GO:0005216;GO:0005230;GO:0005230;GO:0005886;GO:0006811;GO:0006811;GO:0006811;GO:0016020;GO:0016021;GO:0016021;GO:0016021;GO:0022848;GO:0022848;GO:0030054;GO:0030054;GO:0034220;GO:0034220;GO:0045202;GO:0045211;GO:0045211;GO:0045211;GO:0060078;GO:0060079;	-	-	-	-	-	-
BGIBMGA002315	9.30083	15.7603	2.84134	0.180284	-2.47166	0.0207285	0.0868731	scaf34	1785669	1787093	+	1095	-	-	-	-	-	-	-	-
BGIBMGA010515	8.47299	14.6749	2.2711	0.154761	-2.69189	0.0207518	0.086917	scaf6	1832693	1834237	+	1545	-	GO:0016614;GO:0016614;GO:0050660;GO:0050660;GO:0055114;GO:0055114;	-	-	-	-	-	-
BGIBMGA011547	9.64612	17.0658	2.22647	0.130464	-2.93827	0.0208283	0.0872056	scaf22	1964842	1970133	+	1521	-	-	-	-	-	-	-	-
BGIBMGA009061	13.5005	21.4075	5.59342	0.261283	-1.93631	0.0208501	0.0872686	scaf63	1280754	1282624	-	1764	-	-	-	-	-	-	-	-
BGIBMGA013881	28.0493	40.2902	15.8084	0.392364	-1.34973	0.0210422	0.0878719	scaf62	2141146	2142530	+	555	-	-	-	-	-	-	-	-
BGIBMGA005015	120.21	167.061	73.3594	0.439117	-1.18732	0.0212681	0.088585	scaf32	4031816	4050823	-	1311	-	GO:0004497;GO:0004499;GO:0004499;GO:0016491;GO:0050660;GO:0050660;GO:0050661;GO:0050661;GO:0055114;GO:0055114;GO:0055114;	-	-	-	-	-	-
BGIBMGA010179	31.5552	45.3682	17.7423	0.391072	-1.35449	0.0216165	0.0898031	scaf15	637330	638520	-	465	-	-	-	-	-	-	-	-
BGIBMGA005677	30.2553	42.4659	18.0448	0.424923	-1.23473	0.0220816	0.0913801	scaf33	3676505	3676754	+	192	-	GO:0005576;GO:0005576;GO:0006030;GO:0006030;GO:0008061;GO:0008061;	-	-	-	-	-	-
BGIBMGA001563	20.0662	30.0861	10.0464	0.333921	-1.58242	0.0225601	0.0930005	scaf7	5539475	5542116	+	453	-	-	-	-	-	-	-	-
BGIBMGA001010	45.8047	62.3431	29.2664	0.469441	-1.09099	0.0227974	0.0937437	scaf1	5666627	5667932	-	726	-	GO:0005576;GO:0005576;GO:0006030;GO:0006030;GO:0008061;GO:0008061;	-	-	-	-	-	-
BGIBMGA002541	14.1721	22.359	5.98517	0.267685	-1.90139	0.0227988	0.0937437	scaf14	5496340	5504708	+	1146	-	GO:0004620;GO:0004620;GO:0016788;GO:0016788;	-	-	-	-	-	-
BGIBMGA001516	72.8446	97.2921	48.3971	0.497441	-1.0074	0.0229984	0.0943529	scaf7	2006370	2008255	+	192	-	-	-	-	-	-	-	-
BGIBMGA001764	26.7264	43.9767	9.47613	0.215481	-2.21437	0.0230471	0.0944322	scaf35	1667609	1668908	+	315	-	-	-	-	-	-	-	-
BGIBMGA010876	15.3134	27.0019	3.62483	0.134243	-2.89708	0.0232305	0.0950855	scaf61	14053	15607	-	1311	-	GO:0005576;GO:0005576;	-	-	-	-	30K protein 12[Source:UniProtKB/TrEMBL;Acc:H9B445]	101739532
BGIBMGA002912	221.78	322.78	120.78	0.374185	-1.41817	0.0232726	0.0952039	scaf30	2731274	2745487	+	3396	-	-	-	-	-	-	-	-
BGIBMGA007163	6.58222	11.8107	1.35373	0.114619	-3.12508	0.0239663	0.097268	scaf74	575913	576761	-	849	-	-	-	-	-	-	-	-
BGIBMGA014550	3.51691	7.03381	0	0	-Inf	0.0241889	0.0979226	scaf452	17961	22613	+	684	-	GO:0006629;GO:0006629;GO:0006633;GO:0006633;GO:0016021;GO:0016021;GO:0016491;GO:0016717;GO:0016717;GO:0055114;GO:0055114;GO:0055114;	-	-	-	-	-	-
BGIBMGA010660	3.49539	6.99079	0	0	-Inf	0.0244494	0.0987385	scaf84	714648	715373	+	726	-	-	-	-	-	-	-	101746045
BGIBMGA001031	23.5271	34.2557	12.7985	0.373615	-1.42038	0.0245949	0.0992532	scaf1	4411694	4428740	-	999	-	GO:0005861;GO:0005861;	-	-	-	-	-	-
BGIBMGA003624	13.216	20.9724	5.45955	0.260321	-1.94163	0.0246315	0.0993697	scaf9	1250997	1256748	+	384	-	GO:0005515;GO:0005622;GO:0005622;GO:0006355;GO:0006355;	-	-	-	-	-	-
BGIBMGA009450	7.45148	13.0682	1.83473	0.140396	-2.83243	0.0248382	0.0999209	scaf40	2031637	2042495	-	4092	-	GO:0002098;GO:0002098;GO:0008168;GO:0008168;GO:0016300;GO:0016300;GO:0030488;GO:0032259;	-	-	-	-	-	-
BGIBMGA013051	9.79953	16.4106	3.18846	0.194293	-2.3637	0.0249491	0.100242	scaf4	6397159	6408522	+	1458	-	GO:0004252;GO:0004252;GO:0006508;GO:0006508;	-	-	-	-	-	101746529
BGIBMGA013674	25.3133	36.3405	14.2861	0.393116	-1.34697	0.0250837	0.100656	scaf126	29735	39807	-	8535	-	-	-	-	-	-	-	-
BGIBMGA005364	14.6533	22.7511	6.55541	0.288136	-1.79518	0.0252318	0.10103	scaf19	2044028	2049560	-	615	-	-	-	-	-	-	-	-
BGIBMGA003514	9.64894	16.1094	3.18846	0.197925	-2.33697	0.0255774	0.102031	scaf9	3975384	3976932	-	732	-	-	-	-	-	-	-	-
BGIBMGA001439	15.869	24.4438	7.29428	0.29841	-1.74463	0.0259819	0.103196	scaf7	4109983	4110570	-	588	-	-	-	-	-	-	-	-
BGIBMGA012620	18.2624	27.485	9.03976	0.328898	-1.60429	0.0265369	0.105075	scaf100	1047263	1057851	+	354	-	GO:0008270;GO:0008270;	-	-	-	-	-	-
BGIBMGA014471	31.5347	43.9386	19.1307	0.435397	-1.1996	0.0272677	0.10734	scaf261	26170	26643	+	384	-	-	-	-	-	-	-	-
BGIBMGA010274	4.60295	8.76953	0.43637	0.0497598	-4.32888	0.0278743	0.109338	scaf15	5173433	5179077	+	1143	-	-	-	-	-	-	-	-
BGIBMGA004654	18.9579	28.3504	9.56537	0.337398	-1.56747	0.0279292	0.109474	scaf135	516906	518336	-	426	-	-	-	-	-	-	-	-
BGIBMGA003100	25.0519	35.8624	14.2414	0.397114	-1.33238	0.0282537	0.110429	scaf13	2173261	2180517	+	1389	-	GO:0005515;	-	-	-	-	-	-
BGIBMGA014186	39.122	57.839	20.4051	0.352791	-1.50311	0.0293622	0.11336	scaf99	503529	519254	+	3549	-	GO:0005216;GO:0005216;GO:0005515;GO:0006811;GO:0006811;GO:0006811;GO:0016020;GO:0016020;GO:0016020;GO:0016021;GO:0016021;GO:0016021;GO:0034220;GO:0034220;GO:0055085;GO:0055085;	-	-	-	-	-	-
BGIBMGA013642	401.566	631.467	171.666	0.271852	-1.87911	0.0294009	0.113476	scaf78	1326051	1347024	+	1524	-	GO:0016020;GO:0016021;GO:0016021;GO:0016021;GO:0055085;GO:0055085;	-	-	-	-	-	-
BGIBMGA006538	6.38695	11.3756	1.39836	0.122926	-3.02413	0.0296051	0.114058	scaf11	6813155	6815001	+	603	-	GO:0005515;	-	-	-	-	-	-
BGIBMGA008388	53.4148	72.0689	34.7607	0.482325	-1.05192	0.0301169	0.115752	scaf2	1160837	1162441	-	858	-	-	-	-	-	-	-	101740013
BGIBMGA004682	15.6084	23.9226	7.29428	0.304912	-1.71354	0.0301376	0.115762	scaf140	6967	11875	+	990	-	-	-	-	-	-	-	-
BGIBMGA009521	25.2493	48.2275	2.2711	0.0470913	-4.4084	0.0302847	0.116188	scaf40	2300577	2301053	+	477	-	GO:0005506;GO:0005506;GO:0016705;GO:0016705;GO:0020037;GO:0020037;GO:0055114;GO:0055114;	-	-	-	-	-	-
BGIBMGA002668	24.5117	34.906	14.1174	0.404441	-1.306	0.030653	0.117425	scaf20	1516126	1519029	+	624	-	-	-	-	-	-	-	-
BGIBMGA005481	42.9978	79.093	6.90253	0.0872711	-3.51835	0.0307529	0.117703	scaf19	4305876	4306670	+	612	-	GO:0005515;	-	-	-	-	-	-
BGIBMGA003621	3.29933	6.59866	0	0	-Inf	0.0322916	0.122736	scaf9	1009533	1010328	+	315	-	-	-	-	-	-	-	-
BGIBMGA009479	3.29933	6.59866	0	0	-Inf	0.0322916	0.122736	scaf40	446322	447059	-	738	-	-	-	-	-	-	-	-
BGIBMGA003763	294.609	408.959	180.259	0.440775	-1.18189	0.0326684	0.123852	scaf91	583928	592395	-	813	-	GO:0007165;GO:0007165;	-	-	-	-	-	101738478
BGIBMGA013002	3.2563	6.51261	0	0	-Inf	0.0329813	0.124783	scaf4	4468778	4471848	+	1851	-	GO:0016614;GO:0016614;GO:0050660;GO:0050660;GO:0055114;GO:0055114;	-	-	-	-	-	105842055
BGIBMGA006441	81.5244	113.789	49.26	0.432907	-1.20787	0.0331904	0.125424	scaf11	486106	487995	-	627	-	-	-	-	-	-	-	-
BGIBMGA009824	98.0882	140.877	55.2996	0.392539	-1.34909	0.0335181	0.126402	scaf51	2586360	2589281	-	672	-	GO:0005515;	-	-	-	-	-	-
BGIBMGA010174	163.625	218.55	108.7	0.49737	-1.00761	0.0336274	0.12674	scaf15	1179049	1187681	-	912	-	-	-	-	-	-	-	-
BGIBMGA005678	33.4769	45.6313	21.3225	0.467277	-1.09765	0.0338217	0.127285	scaf33	3679332	3680806	+	573	-	-	-	-	-	-	-	-
BGIBMGA004844	19.2191	28.4364	10.0017	0.351723	-1.50749	0.0338588	0.127387	scaf46	639089	654538	+	2748	-	GO:0004930;GO:0004930;GO:0007186;GO:0016020;GO:0016020;GO:0016020;GO:0016021;GO:0016021;	-	-	-	-	-	-
BGIBMGA006670	14.2404	21.8808	6.60003	0.301636	-1.72912	0.0340107	0.127697	scaf10	88015	89899	-	237	-	-	-	-	-	-	-	-
BGIBMGA006380	31.7791	43.5895	19.9687	0.458109	-1.12624	0.034363	0.128344	scaf11	4115965	4116710	-	285	-	-	-	-	-	-	-	-
BGIBMGA011312	31.5393	43.2883	19.7902	0.457173	-1.12919	0.0346102	0.129079	scaf12	794312	796392	+	327	-	-	-	-	-	-	-	-
BGIBMGA003180	712.824	964.07	461.578	0.478781	-1.06256	0.0348398	0.12971	scaf13	5000396	5003718	+	1119	-	GO:0016020;GO:0016020;GO:0016020;GO:0016021;GO:0016021;GO:0030001;GO:0030001;GO:0046873;GO:0046873;GO:0055085;GO:0055085;	-	-	-	-	-	-
BGIBMGA010059	29.8877	41.1605	18.615	0.452254	-1.14479	0.0350109	0.130196	scaf45	1025170	1028091	+	2922	-	GO:0005216;GO:0005216;GO:0005515;GO:0006811;GO:0006811;GO:0006811;GO:0016020;GO:0016020;GO:0016020;GO:0016021;GO:0016021;GO:0034220;GO:0055085;GO:0055085;	-	-	-	-	-	-
BGIBMGA014348	5.23477	9.59681	0.872739	0.0909406	-3.45893	0.0352837	0.130869	scaf1919	812	2882	-	1353	-	-	-	-	-	-	-	-
BGIBMGA003312	880.273	1262.07	498.475	0.394966	-1.3402	0.0353636	0.131032	scaf42	3047766	3056458	-	1431	-	GO:0003676;GO:0003676;GO:0006139;GO:0006139;GO:0008408;GO:0008408;GO:0090305;	-	-	-	-	-	-
BGIBMGA006666	34.7425	52.6602	16.8249	0.319499	-1.64612	0.0353685	0.131032	scaf10	527986	531316	-	2877	-	-	-	-	-	-	-	-
BGIBMGA011613	39.1647	53.7936	24.5358	0.456111	-1.13254	0.0356284	0.131765	scaf16	5425059	5425226	-	168	-	-	-	-	-	-	-	-
BGIBMGA003889	9.88784	16.1955	3.5802	0.221062	-2.17748	0.0357528	0.132089	scaf72	562671	575103	+	825	-	GO:0015986;GO:0015986;GO:0045261;GO:0045261;GO:0046933;GO:0046933;GO:0099132;	-	-	-	-	-	-
BGIBMGA013757	9.21299	15.2821	3.14383	0.20572	-2.28125	0.0366816	0.134451	scaf47	799000	805975	-	1095	-	GO:0003824;GO:0003824;GO:0005975;GO:0005975;GO:0016810;GO:0016810;	-	-	-	-	-	-
BGIBMGA002926	344.977	478.073	211.881	0.443198	-1.17398	0.0367463	0.134506	scaf30	3673135	3679805	+	1770	-	GO:0005515;	-	-	-	-	-	-
BGIBMGA007029	4.30012	8.11925	0.480993	0.0592411	-4.07726	0.0370172	0.135305	scaf21	1800324	1805217	-	429	-	-	-	-	-	-	-	-
BGIBMGA005737	24.921	35.2981	14.5439	0.412031	-1.27917	0.0373146	0.136121	scaf123	392480	392816	+	177	-	-	-	-	-	-	-	-
BGIBMGA014131	35.4542	47.9743	22.9341	0.47805	-1.06477	0.0374609	0.136383	scaf76	1023084	1023427	+	258	-	GO:0005622;GO:0005622;GO:0035556;GO:0035556;	-	-	-	-	-	-
BGIBMGA004633	13.1313	20.3221	5.94055	0.29232	-1.77438	0.0375759	0.136724	scaf193	8426	10886	-	801	-	-	-	-	-	-	-	-
BGIBMGA013135	6.97331	12.1119	1.83473	0.151481	-2.72279	0.0377698	0.137274	scaf124	194997	196007	+	1011	-	GO:0006457;GO:0006457;GO:0051082;GO:0051082;	K09519	-	-	-	-	101742936
BGIBMGA007424	2713.12	4105.03	1321.2	0.32185	-1.63554	0.0378423	0.137421	scaf55	1805480	1812563	+	1500	-	GO:0016020;GO:0016021;GO:0016021;	-	-	-	-	-	-
BGIBMGA004748	18.5472	33.1224	3.97195	0.119917	-3.05989	0.0380698	0.13813	scaf57	1309906	1346148	-	4254	-	GO:0016020;GO:0016021;GO:0016021;GO:0016021;	-	-	-	-	-	-
BGIBMGA011745	208.798	278.459	139.137	0.499667	-1.00096	0.0385715	0.139622	scaf16	26095	30456	-	339	-	-	-	-	-	-	-	-
BGIBMGA010899	25.509	35.9484	15.0696	0.419199	-1.25429	0.0385836	0.139622	scaf61	1701827	1710303	+	717	BMORCPR78	GO:0042302;GO:0042302;GO:0042302;	-	-	-	-	Putative cuticle protein[Source:UniProtKB/TrEMBL;Acc:C0H6S0]	100379395
BGIBMGA013429	18.8939	27.7861	10.0017	0.359954	-1.47411	0.0387582	0.140112	scaf111	897335	904171	-	1128	-	GO:0016020;GO:0016021;GO:0016021;GO:0016021;GO:0022857;GO:0022857;GO:0055085;GO:0055085;	-	-	-	-	-	-
BGIBMGA002927	464.122	639.616	288.627	0.451251	-1.148	0.0389648	0.140571	scaf30	3786084	3793471	+	2094	-	GO:0005096;GO:0005096;GO:0007165;GO:0007165;GO:0043547;	-	-	-	-	-	-
BGIBMGA009917	978.01	1335.98	620.043	0.464112	-1.10745	0.0392971	0.141542	scaf51	2354137	2371976	+	2196	-	GO:0004407;GO:0005634;GO:0005634;GO:0006325;GO:0006351;GO:0006355;GO:0016575;GO:0016787;GO:0032041;GO:0032041;GO:0070932;	-	-	-	-	-	-
BGIBMGA006313	12.5409	19.6669	5.41493	0.275332	-1.86076	0.039441	0.141862	scaf49	1317110	1320058	+	1980	-	GO:0000166;GO:0005524;GO:0005524;	-	-	-	-	-	-
BGIBMGA000847	16.4815	24.5729	8.39014	0.341439	-1.5503	0.039759	0.142765	scaf1	14983858	14984172	-	315	-	-	-	-	-	-	-	-
BGIBMGA011203	4.38617	8.29135	0.480993	0.0580114	-4.10752	0.0400619	0.143732	scaf12	4916587	4917564	-	978	-	-	-	-	-	-	-	-
BGIBMGA013807	40.8137	57.3941	24.2333	0.422227	-1.24391	0.0415588	0.148109	scaf62	2229430	2239044	-	1488	-	GO:0016020;GO:0016021;GO:0016021;GO:0016021;GO:0055085;GO:0055085;	-	-	-	-	-	-
BGIBMGA008869	11.8246	18.5815	5.06781	0.272734	-1.87443	0.0418278	0.148655	scaf17	4392188	4395617	-	1509	-	GO:0016020;GO:0016021;GO:0016021;GO:0016021;GO:0055085;GO:0055085;	-	-	-	-	-	-
BGIBMGA002426	11.8031	18.5384	5.06781	0.273367	-1.87109	0.0419248	0.148816	scaf14	2002337	2017151	-	1620	-	GO:0003824;GO:0003824;GO:0004571;GO:0004571;GO:0005509;GO:0005509;GO:0008152;GO:0008152;GO:0016020;GO:0016020;GO:0016787;GO:0016798;	K01230	EC:3.2.1.113	-	-	-	101744477
BGIBMGA002612	20.9597	30.3061	11.6134	0.383202	-1.38382	0.0419772	0.148816	scaf20	2249067	2253561	-	828	-	-	-	-	-	-	-	-
BGIBMGA005215	11.7542	19.839	3.66945	0.184961	-2.4347	0.0426382	0.150577	scaf119	585937	588319	+	918	-	-	K19755	-	-	-	-	101740871
BGIBMGA004130	58.3845	88.7573	28.0117	0.315599	-1.66383	0.0428097	0.151016	scaf36	3387161	3391804	+	1071	-	GO:0016491;GO:0016491;GO:0055114;GO:0055114;	-	-	-	-	-	101742189
BGIBMGA008373	19.8507	28.8716	10.8299	0.375104	-1.41464	0.0430023	0.151571	scaf2	2811954	2816742	-	801	-	-	-	-	-	-	-	-
BGIBMGA012645	35.979	48.1512	23.8068	0.494417	-1.0162	0.0432919	0.152257	scaf129	42334	42762	-	429	-	-	-	-	-	-	-	-
BGIBMGA014622	42.5861	58.4893	26.6829	0.456202	-1.13226	0.0436574	0.15326	BABH01043998	3016	8348	-	1266	-	GO:0008152;GO:0015020;GO:0015020;GO:0016020;GO:0016021;GO:0016021;GO:0016740;GO:0016757;GO:0016758;GO:0016758;	-	-	-	-	-	-
BGIBMGA006300	145.858	195.928	95.7876	0.488892	-1.03241	0.0436927	0.153303	scaf49	588504	588809	+	306	-	-	-	-	-	-	-	-
BGIBMGA000405	46.348	69.1569	23.5391	0.340372	-1.55482	0.0436969	0.153303	scaf18	2260383	2261775	+	552	-	-	-	-	-	-	-	-
BGIBMGA005359	36.5	48.8015	24.1986	0.495856	-1.01201	0.0441874	0.154644	scaf19	2258686	2259877	-	1116	-	-	-	-	-	-	-	-
BGIBMGA013569	5.018	9.11863	0.917363	0.100603	-3.31325	0.0443486	0.154954	scaf130	405896	406467	+	258	-	-	-	-	-	-	-	-
BGIBMGA003170	30.3681	46.1476	14.5886	0.316128	-1.66142	0.0443943	0.155072	scaf13	4553556	4557179	+	2862	-	GO:0003810;GO:0003810;GO:0018149;GO:0018149;	-	-	-	-	-	-
BGIBMGA004981	202.508	333.314	71.7032	0.215122	-2.21677	0.04458	0.155678	scaf65	952104	954337	+	2160	-	GO:0005515;	-	-	-	-	-	-
BGIBMGA011660	6070.93	9169.59	2972.27	0.324144	-1.62529	0.0446976	0.156004	scaf16	2492321	2493952	-	1632	-	GO:0005515;	K07189	-	-	-	-	101745881
BGIBMGA008039	25.5535	35.6903	15.4167	0.431957	-1.21104	0.0449719	0.156791	scaf41	25509	43503	+	1137	-	GO:0004930;GO:0004930;GO:0004930;GO:0004983;GO:0004983;GO:0007165;GO:0007186;GO:0007186;GO:0007186;GO:0007218;GO:0016020;GO:0016021;GO:0016021;GO:0016021;	-	-	-	-	-	-
BGIBMGA001543	2.97419	5.94838	0	0	-Inf	0.0454526	0.158209	scaf7	4395231	4395845	+	333	-	GO:0016020;GO:0016021;GO:0016021;	-	-	-	-	-	-
BGIBMGA006397	2.97419	5.94838	0	0	-Inf	0.0454526	0.158209	scaf11	2368815	2369369	-	555	-	GO:0003677;GO:0003677;GO:0003677;GO:0005634;GO:0005634;GO:0006355;GO:0006355;GO:0043565;GO:0043565;	-	-	-	-	-	101741023
BGIBMGA000940	30.191	41.1174	19.2646	0.468527	-1.0938	0.0458296	0.159349	scaf1	9367230	9370373	-	888	-	-	-	-	-	-	-	101741724
BGIBMGA005024	3.88507	7.77015	0	0	-Inf	0.0468723	0.161965	scaf32	3676185	3678517	-	795	-	-	-	-	-	-	-	-
BGIBMGA010582	32.8424	44.4168	21.268	0.478828	-1.06242	0.0470223	0.162091	scaf6	7705573	7713700	+	681	-	GO:0005576;GO:0005576;GO:0052689;GO:0052689;	-	-	-	-	-	-
BGIBMGA008067	13.4555	20.6233	6.28767	0.304882	-1.71368	0.0471081	0.162299	scaf41	1299985	1314597	+	1704	-	GO:0015643;GO:0016020;GO:0016021;GO:0016021;	-	-	-	-	-	-
BGIBMGA009268	104.763	142.311	67.2155	0.472313	-1.08218	0.0473721	0.162934	scaf38	1312816	1313102	+	198	-	GO:0005515;	-	-	-	-	-	-
BGIBMGA002794	5.7789	10.2041	1.35373	0.132666	-2.91413	0.0474319	0.162934	scaf30	2475337	2476341	-	1005	-	GO:0008271;GO:0008271;GO:0008272;GO:0008272;GO:0015116;GO:0015116;GO:0016020;GO:0016020;GO:0016020;GO:0016021;GO:0016021;GO:0016021;GO:0055085;GO:0055085;GO:1902358;	-	-	-	-	-	-
BGIBMGA013806	35.7144	47.8452	23.5837	0.492917	-1.02058	0.0475166	0.163107	scaf62	2271967	2273334	-	789	-	-	-	-	-	-	-	-
BGIBMGA001017	8.53893	14.3258	2.75209	0.192107	-2.38002	0.0478031	0.163858	scaf1	5491868	5494856	-	405	-	-	-	-	-	-	-	-
BGIBMGA006452	24.8372	34.6048	15.0696	0.435475	-1.19934	0.0485137	0.165631	scaf11	561671	564168	+	504	-	-	-	-	-	-	-	-
BGIBMGA001466	23.29	32.8642	13.7158	0.417348	-1.26068	0.0485529	0.165676	scaf7	736162	743385	-	1974	-	-	-	-	-	-	-	-
BGIBMGA005030	23.2462	32.8212	13.6712	0.416536	-1.26349	0.0486384	0.165924	scaf32	3466637	3475173	-	840	-	GO:0016020;GO:0016021;GO:0016021;	-	-	-	-	-	-
BGIBMGA006692	34.0629	45.7173	22.4085	0.490152	-1.0287	0.0489021	0.166342	scaf10	2281033	2294549	+	2325	-	GO:0005515;	-	-	-	-	Hemocytin [Source:UniProtKB/Swiss-Prot;Acc:P98092]	-
