# Supplementary material for: Corona or hydrochloric acid modulates embryonic diapause in silkworms by activating different signaling pathways
Source: PeerJ. 2025 Feb 20;13:e18966. doi: 10.7717/peerj.18966 (PMC11847486; doi:10.7717/peerj.18966)
Supplement: Table S9 [file peerj-13-18966-s010.xlsx]

## Sheet: Sheet1
id	baseMean	baseMeanA	baseMeanB	foldChange	log2FoldChange	pval	padj	Chromosome	Start Site	End Site	Direction	Length	Name	GO	KEGG	EC	eggNOG Class	eggNOG	Description	NCBI_GI
BGIBMGA014618	7684.37	152.453	15216.3	99.8095	6.64111	8.02346e-236	1.0538e-231	scaf624	6671	8814	-	1161	-	GO:0000166;GO:0005524;GO:0005524;	-	-	-	-	-	-
BGIBMGA004614	18489.1	399.308	36578.8	91.6056	6.51736	2.21553e-202	1.45494e-198	scaf128	599080	601061	-	1668	-	GO:0000166;GO:0005524;GO:0005524;	-	-	-	-	-	-
BGIBMGA014536	1847.23	21.8006	3672.66	168.466	7.39632	3.71998e-201	1.62861e-197	scaf377	13743	15629	-	1887	BMO.7782	GO:0000166;GO:0005524;GO:0005524;	K03283	-	-	-	Heat shock protein 68[Source:UniProtKB/TrEMBL;Acc:F8UN43]	100862772
BGIBMGA004613	6877.01	232.367	13521.7	58.191	5.86272	2.10167e-200	6.90083e-197	scaf128	607395	609831	-	762	-	GO:0000166;GO:0005524;GO:0005524;	-	-	-	-	-	-
BGIBMGA001635	1155.56	87.8809	2223.23	25.2982	4.66096	1.30135e-109	3.41839e-106	scaf35	3000016	3001920	-	1905	-	GO:0000166;GO:0005524;GO:0005524;	-	-	-	-	-	-
BGIBMGA006976	12917.2	2301.33	23533.2	10.2259	3.35415	1.14231e-89	2.50051e-86	scaf21	5180778	5191391	-	2064	SAMUI	GO:0051087;GO:0051087;	-	-	-	-	BAG domain-containing protein Samui[Source:UniProtKB/Swiss-Prot;Acc:Q9BLJ6]	-
BGIBMGA013536	5168.69	1031.1	9306.28	9.02558	3.17402	4.31474e-78	8.09569e-75	scaf101	956749	958038	+	1056	DNAJ-5	GO:0006457;GO:0006457;GO:0051082;GO:0051082;	-	-	-	-	DnaJ-5 [Source:UniProtKB/TrEMBL;Acc:H6VTP5]"	692539
BGIBMGA005823	1161.22	192.596	2129.84	11.0586	3.46709	7.03297e-73	1.15464e-69	scaf54	1799242	1799982	+	741	-	-	-	-	-	-	-	101742822
BGIBMGA000563	1788.85	35.5514	3542.14	99.6342	6.63857	2.85413e-44	3.74861e-41	scaf8	3197782	3205069	-	1686	TH	GO:0004497;GO:0004497;GO:0004511;GO:0004511;GO:0004511;GO:0005506;GO:0005506;GO:0009072;GO:0009072;GO:0016491;GO:0016714;GO:0016714;GO:0042423;GO:0042423;GO:0046872;GO:0055114;GO:0055114;GO:0055114;	K00501	EC:1.14.16.2	-	-	Tyrosine hydroxylase[Source:UniProtKB/TrEMBL;Acc:B7XAK2]	100270767
BGIBMGA004612	44080	5128.06	83032	16.1917	4.01718	7.91492e-41	9.45042e-38	scaf128	617708	619858	-	2151	HSP90	GO:0000166;GO:0005515;GO:0005524;GO:0005524;GO:0005524;GO:0005737;GO:0005737;GO:0006457;GO:0006457;GO:0006950;GO:0051082;GO:0051082;	K04079	-	-	-	90-kDa heat shock protein[Source:UniProtKB/TrEMBL;Acc:Q9BLC5]	692420
BGIBMGA002021	622.042	171.53	1072.56	6.25289	2.64452	4.26374e-39	4.66666e-36	scaf23	2300561	2316998	-	2229	-	GO:0016020;GO:0016021;GO:0016021;	-	-	-	-	-	-
BGIBMGA008709	11560.3	4454.14	18666.6	4.19084	2.06724	7.58243e-39	7.66059e-36	scaf90	406890	408545	+	1656	-	GO:0004553;GO:0004553;GO:0004568;GO:0004568;GO:0005975;GO:0005975;GO:0006032;GO:0006032;GO:0008061;GO:0008061;GO:0008152;GO:0016787;GO:0016798;	-	-	-	-	-	-
BGIBMGA004605	4856.71	510.854	9202.57	18.0141	4.17105	2.41535e-38	2.26594e-35	scaf48	2707115	2707675	+	87	-	-	-	-	-	-	-	-
BGIBMGA008090	1391.36	544.71	2238.02	4.10864	2.03866	4.87828e-31	3.7689e-28	scaf87	1195070	1198477	-	825	-	-	-	-	-	-	-	-
BGIBMGA011072	131.627	15.9827	247.272	15.4712	3.95151	9.72645e-30	7.09706e-27	scaf31	1210358	1211626	+	1269	-	GO:0006629;GO:0006629;GO:0016042;GO:0016042;GO:0016787;GO:0016788;GO:0016788;	-	-	-	-	Lipase [Source:UniProtKB/TrEMBL;Acc:H9JNG9]"	-
BGIBMGA013638	92.4158	5.90041	178.931	30.3252	4.92245	1.69981e-28	1.11626e-25	scaf78	1123851	1139965	+	1134	-	GO:0016020;GO:0016021;GO:0016021;	-	-	-	-	-	-
BGIBMGA008397	507.558	141.987	873.129	6.14935	2.62043	7.63947e-28	4.77794e-25	scaf2	877849	879199	-	963	CPG39	-	-	-	-	-	Putative cuticle protein CPG39[Source:UniProtKB/TrEMBL;Acc:D0VEN4]	101745386
BGIBMGA011774	452.223	114.808	789.638	6.87792	2.78197	4.31989e-27	2.57897e-24	scaf16	938936	952575	+	966	-	GO:0003824;GO:0003824;GO:0004731;GO:0004731;GO:0004731;GO:0006139;GO:0006139;GO:0009116;GO:0009116;GO:0016740;GO:0016757;	K03783	EC:2.4.2.1	-	-	Purine nucleoside phosphorylase[Source:UniProtKB/TrEMBL;Acc:H9JQG8]	101736818
BGIBMGA011596	176.502	36.0357	316.968	8.79596	3.13684	5.52045e-27	3.15242e-24	scaf197	19832	26051	-	744	-	-	-	-	-	-	-	-
BGIBMGA004541	3609.4	447.295	6771.51	15.1388	3.92018	1.74117e-25	9.14742e-23	scaf48	2701904	2702449	-	546	HSP20.4	GO:0046872;	K09542	-	-	-	Heat shock protein hsp20.4[Source:UniProtKB/TrEMBL;Acc:Q9GSB6]	692591
BGIBMGA005534	247.285	77.1442	417.425	5.41097	2.43589	2.52415e-22	1.27508e-19	scaf33	3883520	3884509	-	990	BM_BRE5	GO:0000139;GO:0000139;GO:0005794;GO:0006486;GO:0006486;GO:0008378;GO:0008378;GO:0016020;GO:0016020;GO:0016020;GO:0016021;GO:0016021;GO:0016740;GO:0016757;	K02175	-	-	-	Beta-1,3-galactosyltransferase[Source:UniProtKB/TrEMBL;Acc:Q1HPJ8]	733133
BGIBMGA004515	313.433	81.4007	545.465	6.70099	2.74437	2.88257e-22	1.40221e-19	scaf97	1076410	1077045	-	636	-	GO:0046872;	-	-	-	-	-	-
BGIBMGA006916	135.858	27.9245	243.792	8.73039	3.12605	3.19757e-22	1.49989e-19	scaf44	617203	619653	-	1626	CYP18A1	GO:0004497;GO:0004497;GO:0005506;GO:0005506;GO:0016020;GO:0016021;GO:0016021;GO:0016491;GO:0016705;GO:0016705;GO:0020037;GO:0020037;GO:0046872;GO:0055114;GO:0055114;GO:0055114;	K14985	EC:1.14.-.-	-	-	Cytochrome P450[Source:UniProtKB/TrEMBL;Acc:A3RKJ4]	100036578
BGIBMGA014257	68.4799	2.3809	134.579	56.5244	5.8208	1.98436e-19	8.40729e-17	scaf80	461743	470879	+	1005	-	GO:0016020;GO:0016021;GO:0016021;GO:0016021;GO:0055085;GO:0055085;	-	-	-	-	-	-
BGIBMGA003938	870.18	426.067	1314.29	3.08471	1.62514	5.17663e-19	2.0603e-16	scaf105	812156	813079	-	924	-	GO:0005634;GO:0005634;GO:0043565;GO:0043565;	-	-	-	-	-	-
BGIBMGA005208	188.862	53.2607	324.464	6.092	2.60692	1.13028e-18	4.36621e-16	scaf119	353100	353987	+	888	-	-	-	-	-	-	-	-
BGIBMGA007234	124.052	31.444	216.661	6.89037	2.78458	1.00543e-17	3.66813e-15	scaf131	67532	79095	-	1362	-	GO:0000166;GO:0003777;GO:0003777;GO:0005524;GO:0005524;GO:0005524;GO:0005874;GO:0005874;GO:0007018;GO:0007018;GO:0008017;GO:0008017;	-	-	-	-	-	-
BGIBMGA005540	194.077	66.4981	321.656	4.83706	2.27413	1.07782e-17	3.73003e-15	scaf33	3182508	3195622	-	2196	-	GO:0003779;GO:0003779;GO:0016043;GO:0016043;GO:0017048;GO:0017048;GO:0030036;GO:0030036;	-	-	-	-	-	-
BGIBMGA004630	4479.2	140.147	8818.25	62.9214	5.97548	1.10759e-17	3.73003e-15	scaf276	14902	15468	+	567	-	GO:0046872;	K09542	-	-	-	-	101743710
BGIBMGA006718	208.515	75.9019	341.128	4.49433	2.16811	6.92491e-17	2.16552e-14	scaf10	3446836	3454293	+	1020	-	GO:0016020;GO:0016021;GO:0016021;	-	-	-	-	-	-
BGIBMGA007505	208.54	78.9453	338.135	4.28316	2.09868	4.75554e-16	1.38798e-13	scaf66	1363848	1367997	-	372	-	GO:0000166;GO:0003924;GO:0003924;GO:0005525;GO:0005525;GO:0005525;GO:0005622;GO:0005622;GO:0007264;GO:0007264;	-	-	-	-	-	-
BGIBMGA003380	50.9296	4.36012	97.4991	22.3616	4.48295	5.14183e-16	1.46811e-13	scaf42	240570	242465	+	1896	-	-	-	-	-	-	-	-
BGIBMGA006839	1830.75	1031.51	2629.99	2.54966	1.3503	7.33008e-16	2.04837e-13	scaf70	19878	25368	-	2181	-	GO:0003677;GO:0003677;GO:0003677;GO:0003700;GO:0003700;GO:0003707;GO:0003707;GO:0004887;GO:0004887;GO:0005634;GO:0005634;GO:0005634;GO:0006351;GO:0006351;GO:0006355;GO:0006355;GO:0006355;GO:0008270;GO:0008270;GO:0030522;GO:0043401;GO:0043565;GO:0043565;GO:0046872;	-	-	-	-	-	-
BGIBMGA001841	1791.7	1038.72	2544.68	2.44983	1.29268	1.05815e-14	2.72503e-12	scaf28	4474337	4479121	-	1680	-	-	-	-	-	-	Carboxylesterase ae27[Source:UniProtKB/TrEMBL;Acc:H9IX58]	101742710
BGIBMGA004405	708.582	347.624	1069.54	3.07672	1.62139	1.94932e-14	4.74119e-12	scaf37	1533823	1534587	-	765	-	GO:0005576;GO:0005576;	-	-	-	-	-	101743208
BGIBMGA000529	984.116	552.476	1415.76	2.56257	1.35759	2.29037e-14	5.4694e-12	scaf8	5005327	5022320	-	2286	-	GO:0004222;GO:0004222;GO:0006508;GO:0006508;GO:0008237;GO:0008237;GO:0016020;GO:0016021;GO:0016021;	-	-	-	-	-	-
BGIBMGA005780	2483.74	785.47	4182.01	5.32421	2.41257	7.26955e-14	1.64618e-11	scaf54	44889	45521	-	633	-	-	K09542	-	-	-	-	101736652
BGIBMGA011204	268.967	122.993	414.941	3.37369	1.75433	1.00208e-13	2.23072e-11	scaf12	4912688	4913668	-	981	-	-	-	-	-	-	-	-
BGIBMGA011297	433.998	224.298	643.697	2.86983	1.52097	1.79732e-13	3.86985e-11	scaf12	546526	549137	-	1026	-	GO:0001671;GO:0001671;GO:0006950;GO:0032781;GO:0051087;GO:0051087;GO:0051879;	-	-	-	-	-	-
BGIBMGA000202	532.643	108.663	956.623	8.8036	3.13809	3.94623e-13	8.35964e-11	BABH01044215	7976	8386	+	411	-	-	-	-	-	-	-	-
BGIBMGA011420	191.843	83.2762	300.41	3.60739	1.85096	1.39882e-12	2.78365e-10	scaf22	5262985	5263887	-	903	-	-	-	-	-	-	-	101742706
BGIBMGA003622	31.9124	1.46579	62.3589	42.5429	5.41085	1.88007e-12	3.6855e-10	scaf9	1026403	1076135	+	13143	-	GO:0003777;GO:0003777;GO:0005524;GO:0005524;GO:0007018;GO:0007018;GO:0016887;GO:0016887;GO:0030286;GO:0030286;	-	-	-	-	-	-
BGIBMGA008162	664.481	251.664	1077.3	4.28071	2.09785	2.71217e-12	5.08881e-10	scaf52	222594	223358	-	765	-	GO:0016020;GO:0016021;GO:0016021;GO:0016021;	-	-	-	-	-	101735959
BGIBMGA010403	136.275	52.3748	220.176	4.20386	2.07171	3.90082e-12	7.21596e-10	scaf6	5323239	5338975	-	1467	-	GO:0016491;GO:0016491;GO:0016491;GO:0016620;GO:0016620;GO:0055114;GO:0055114;GO:0055114;	K00128	EC:1.2.1.3	-	-	Mitochondrial aldehyde dehydrogenase[Source:UniProtKB/TrEMBL;Acc:Q2F5Y9]	692889
BGIBMGA010934	798.224	468.231	1128.22	2.40953	1.26875	4.36318e-12	7.77157e-10	scaf68	142750	152011	-	1485	-	GO:0016020;GO:0016021;GO:0016021;GO:0016021;GO:0055085;GO:0055085;	-	-	-	-	-	-
BGIBMGA012035	582.602	295.545	869.658	2.94256	1.55707	4.37869e-12	7.77157e-10	scaf24	3599510	3621896	-	1422	-	GO:0000166;GO:0005524;GO:0005524;GO:0005524;GO:0016020;GO:0016020;GO:0016020;GO:0016021;GO:0016021;GO:0016887;GO:0016887;	-	-	-	-	-	-
BGIBMGA011595	2538.62	912.565	4164.68	4.5637	2.19021	5.10606e-12	8.94173e-10	scaf197	54688	61431	-	756	-	-	-	-	-	-	-	-
BGIBMGA008514	23.6133	0	47.2266	Inf	Inf	5.428e-12	9.38044e-10	scaf2	7071245	7073795	+	885	-	GO:0004252;GO:0004252;GO:0006508;GO:0006508;GO:0006508;GO:0008233;GO:0008236;GO:0016787;	-	-	-	-	-	-
BGIBMGA005441	182.727	45.663	319.791	7.00329	2.80803	8.81362e-12	1.48408e-09	scaf19	1592336	1602679	+	2457	-	-	-	-	-	-	-	-
BGIBMGA011809	422.008	223.184	620.833	2.78171	1.47597	9.56252e-12	1.5898e-09	scaf16	2175396	2186614	+	723	-	GO:0016020;GO:0016020;GO:0016020;GO:0016021;GO:0016021;GO:0030001;GO:0030001;GO:0046873;GO:0046873;GO:0055085;GO:0055085;	-	-	-	-	-	-
BGIBMGA008711	142.215	56.8014	227.628	4.00744	2.00268	1.01085e-11	1.65956e-09	scaf90	433351	435163	+	309	-	-	-	-	-	-	-	-
BGIBMGA004301	46.4158	7.3662	85.4654	11.6024	3.53635	1.51048e-11	2.36174e-09	scaf79	561128	570337	-	933	-	-	-	-	-	-	-	-
BGIBMGA002396	932.233	83.7071	1780.76	21.2737	4.411	2.08925e-11	3.19072e-09	scaf14	3534217	3542733	-	657	-	-	-	-	-	-	-	101738673
BGIBMGA012541	3385.9	2206.07	4565.74	2.06963	1.04937	3.79634e-11	5.66603e-09	scaf77	561894	567376	-	1206	-	GO:0005524;GO:0005524;GO:0006457;GO:0006457;GO:0009408;GO:0009408;GO:0031072;GO:0031072;GO:0046872;GO:0046872;GO:0051082;GO:0051082;	-	-	-	-	-	-
BGIBMGA013259	769.228	469.982	1068.47	2.27344	1.18488	9.69298e-11	1.3689e-08	scaf39	2723491	2727372	+	1299	-	-	-	-	-	-	-	-
BGIBMGA009689	540.944	170.926	910.963	5.32959	2.41402	1.14341e-10	1.59761e-08	scaf27	1128425	1132319	-	765	-	GO:0016020;GO:0016021;GO:0016021;GO:0016021;	-	-	-	-	-	-
BGIBMGA011377	43.5895	7.2917	79.8872	10.9559	3.45364	1.24587e-10	1.7045e-08	scaf12	3978381	3981471	+	1815	-	-	-	-	-	-	-	-
BGIBMGA004540	14385.3	6916.89	21853.7	3.15947	1.65968	1.50125e-10	2.01198e-08	scaf48	2718195	2718728	-	534	HSP19.9	GO:0046872;	K09542	-	-	-	Heat shock protein hsp 19.9[Source:UniProtKB/TrEMBL;Acc:Q5R1P7]	692533
BGIBMGA001636	538.905	29.0259	1048.78	36.1327	5.17524	1.78863e-10	2.37291e-08	scaf35	2986562	2998105	-	1923	-	-	-	-	-	-	-	-
BGIBMGA001896	3226.04	2133.91	4318.17	2.02359	1.01692	1.86745e-10	2.45052e-08	scaf28	1356902	1383224	-	4161	-	GO:0016020;GO:0016021;GO:0016021;	-	-	-	-	-	-
BGIBMGA013860	538.004	235.62	840.389	3.56672	1.8346	3.26141e-10	4.11878e-08	scaf62	965862	979897	+	3087	-	GO:0008152;GO:0016020;GO:0016021;GO:0016021;GO:0016740;GO:0016758;GO:0016758;	-	-	-	-	-	-
BGIBMGA007950	4216.68	2578.24	5855.12	2.27098	1.18331	3.48983e-10	4.3241e-08	scaf3	8362275	8364610	+	1968	HSP70	GO:0000166;GO:0005524;GO:0005524;	-	-	-	-	Heat shock protein 70-3[Source:UniProtKB/TrEMBL;Acc:F8UN44]	-
BGIBMGA007194	508.414	303.057	713.771	2.35524	1.23587	4.2283e-10	5.19014e-08	scaf74	323731	336549	+	2817	-	GO:0000166;GO:0003677;GO:0004176;GO:0004176;GO:0004176;GO:0004252;GO:0004252;GO:0004252;GO:0005524;GO:0005524;GO:0005524;GO:0005739;GO:0005759;GO:0005759;GO:0006508;GO:0006508;GO:0006508;GO:0006515;GO:0006515;GO:0006515;GO:0008233;GO:0008236;GO:0016787;GO:0016887;GO:0030163;GO:0030163;GO:0034599;GO:0034599;GO:0043565;GO:0043565;GO:0051131;GO:0051131;GO:0070407;GO:0070407;	-	-	-	-	Lon protease homolog, mitochondrial[Source:UniProtKB/TrEMBL;Acc:H9JCE9]	-
BGIBMGA003383	23.8569	0.95236	46.7615	49.1006	5.61767	5.17134e-10	6.28893e-08	scaf42	248480	253914	+	1824	-	-	-	-	-	-	-	-
BGIBMGA009064	19.3277	0	38.6555	Inf	Inf	5.3875e-10	6.49169e-08	scaf63	1177389	1181819	-	474	-	-	-	-	-	-	-	-
BGIBMGA012521	34.3041	4.32287	64.2854	14.871	3.89443	5.58032e-10	6.60287e-08	scaf183	149994	152645	+	939	-	GO:0005576;GO:0005576;	K19919	-	-	-	-	101746572
BGIBMGA001075	736.399	461.908	1010.89	2.18851	1.12995	8.77087e-10	1.01944e-07	scaf1	217988	219319	-	1332	-	GO:0016020;GO:0016021;GO:0016021;	K04714	EC:2.7.8.27	-	-	-	101746851
BGIBMGA001398	129.806	57.0913	202.52	3.54731	1.82672	1.52782e-09	1.71976e-07	scaf7	6986851	7001451	-	1308	-	GO:0042981;GO:0042981;	-	-	-	-	-	-
BGIBMGA006555	1149.28	748.548	1550.01	2.07069	1.05011	1.56777e-09	1.74501e-07	scaf10	6600624	6624320	-	3819	-	GO:0000166;GO:0000166;GO:0004016;GO:0004016;GO:0005622;GO:0005622;GO:0005886;GO:0005886;GO:0006171;GO:0006171;GO:0009190;GO:0009190;GO:0016020;GO:0016021;GO:0016021;GO:0016829;GO:0016849;GO:0016849;GO:0035556;GO:0035556;	-	-	-	-	-	-
BGIBMGA008964	2588.09	1596.21	3579.97	2.24279	1.16529	2.11399e-09	2.29464e-07	scaf17	1616566	1617042	+	477	E(SPL)MALPHA	GO:0007219;GO:0007219;GO:0007423;GO:0007423;	-	-	-	-	M4-like protein[Source:UniProtKB/TrEMBL;Acc:B7U628]	100216502
BGIBMGA003939	267.679	148.433	386.924	2.60672	1.38224	2.65253e-09	2.8556e-07	scaf105	782434	782643	-	210	-	GO:0003677;GO:0003700;GO:0003700;GO:0005634;GO:0005634;GO:0006355;GO:0006355;GO:0043565;GO:0043565;	-	-	-	-	-	-
BGIBMGA006315	1087.85	714.71	1460.99	2.04417	1.03151	3.37401e-09	3.49642e-07	scaf49	1397190	1398584	+	1395	-	-	-	-	-	-	-	101740768
BGIBMGA012577	436.456	263.771	609.141	2.30936	1.20749	3.38089e-09	3.49642e-07	scaf77	1604961	1624863	+	3153	-	GO:0004842;GO:0004842;GO:0016020;GO:0016021;GO:0016021;GO:0016567;GO:0016740;	-	-	-	-	-	-
BGIBMGA010546	160.584	58.5279	262.641	4.48744	2.16589	3.65205e-09	3.71829e-07	scaf6	4916009	4929651	+	1131	-	GO:0004252;GO:0004252;GO:0006508;GO:0006508;GO:0006508;GO:0008233;GO:0008236;GO:0016787;	-	-	-	-	-	-
BGIBMGA000273	42.2729	8.68299	75.8628	8.73695	3.12713	3.76772e-09	3.80656e-07	scaf18	3214718	3218072	-	354	-	GO:0042302;GO:0042302;GO:0042302;	-	-	-	-	-	-
BGIBMGA002937	24.8597	1.97922	47.7401	24.1207	4.5922	5.14103e-09	5.07686e-07	scaf30	4180464	4212898	+	3294	NSL	GO:0004517;GO:0004517;GO:0004517;GO:0005516;GO:0005516;GO:0005516;GO:0006809;GO:0006809;GO:0010181;GO:0010181;GO:0016491;GO:0016491;GO:0016491;GO:0020037;GO:0020037;GO:0046872;GO:0046872;GO:0050660;GO:0050660;GO:0050661;GO:0050661;GO:0055114;GO:0055114;GO:0055114;	K13240	EC:1.14.13.39	-	-	Nitric oxide synthase-like protein[Source:UniProtKB/Swiss-Prot;Acc:B1B557]	100144542
BGIBMGA002934	30.3906	1.42854	59.3527	41.5478	5.3767	5.54204e-09	5.43203e-07	scaf30	4007443	4007766	+	324	-	-	-	-	-	-	-	101742431
BGIBMGA013639	1460.67	708.956	2212.38	3.12062	1.64183	5.77823e-09	5.62157e-07	scaf78	1148852	1159587	+	1095	-	GO:0016020;GO:0016021;GO:0016021;	-	-	-	-	-	-
BGIBMGA011333	470.514	289.224	651.803	2.25363	1.17225	6.16638e-09	5.92264e-07	scaf12	2101251	2104921	+	987	-	-	K06643	EC:2.3.2.27	-	-	MDM2-like protein[Source:UniProtKB/TrEMBL;Acc:H9JP79]	101745393
BGIBMGA013829	29.6126	0	59.2252	Inf	Inf	6.43893e-09	6.12819e-07	scaf62	951277	954869	-	1545	UGT33D8	GO:0008152;GO:0015020;GO:0015020;GO:0016020;GO:0016021;GO:0016021;GO:0016740;GO:0016757;GO:0016758;GO:0016758;	-	-	-	-	UDP-glycosyltransferase UGT33D8[Source:UniProtKB/TrEMBL;Acc:G9LPS9]	-
BGIBMGA002670	54.7234	2.5299	106.917	42.2614	5.40127	7.00509e-09	6.57177e-07	scaf20	1558555	1561963	+	999	-	GO:0005576;GO:0005576;GO:0006629;GO:0006629;GO:0052689;GO:0052689;	-	-	-	-	-	-
BGIBMGA007961	279.624	160.822	398.427	2.47744	1.30885	1.04897e-08	9.50148e-07	scaf3	8977825	8979285	+	1461	-	GO:0003676;GO:0003676;GO:0003723;GO:0003723;	-	-	-	-	-	-
BGIBMGA006016	513.637	310.958	716.317	2.30358	1.20388	1.18976e-08	1.05583e-06	scaf5	3257593	3261652	-	753	-	GO:0008474;GO:0008474;GO:0016790;GO:0016790;GO:0098599;GO:0098599;GO:0098734;	-	-	-	-	-	-
BGIBMGA009155	121.14	55.3356	186.945	3.37839	1.75633	1.2463e-08	1.09859e-06	scaf96	1000760	1001269	+	510	-	-	K03871	-	-	-	-	101739221
BGIBMGA003355	297.078	135.635	458.521	3.38055	1.75726	2.33739e-08	1.943e-06	scaf42	669972	676803	-	924	-	GO:0005525;GO:0005525;	K16185	-	-	-	-	101742921
BGIBMGA010385	410.106	253.01	567.202	2.24182	1.16467	2.9816e-08	2.42495e-06	scaf6	6627155	6642180	-	2631	-	GO:0003824;GO:0003824;GO:0004553;GO:0004553;	-	-	-	-	-	-
BGIBMGA004474	445.145	201.276	689.014	3.42323	1.77536	4.23181e-08	3.32818e-06	scaf37	2264910	2265779	+	870	-	GO:0005576;GO:0005576;	-	-	-	-	-	101737529
BGIBMGA013585	54.6148	9.8216	99.408	10.1214	3.33933	4.26517e-08	3.33445e-06	scaf78	745488	757918	-	1767	-	GO:0016020;GO:0016021;GO:0016021;GO:0016021;GO:0055085;GO:0055085;	-	-	-	-	-	-
BGIBMGA001276	52.2479	16.0945	88.4012	5.49264	2.4575	4.6081e-08	3.58123e-06	scaf1	13184825	13200127	+	1377	-	GO:0004497;GO:0004497;GO:0005506;GO:0005506;GO:0016491;GO:0016705;GO:0016705;GO:0020037;GO:0020037;GO:0046872;GO:0055114;GO:0055114;GO:0055114;	K15004	EC:1.14.-.-	-	-	-	101744617
BGIBMGA008451	972.367	628.726	1316.01	2.09313	1.06566	5.16432e-08	3.9435e-06	scaf2	2556596	2562617	+	981	-	GO:0016301;GO:0016301;GO:0016301;GO:0016310;GO:0016740;GO:0032958;GO:0032958;	-	-	-	-	-	-
BGIBMGA000032	105.559	47.3814	163.737	3.45573	1.78899	5.78188e-08	4.36432e-06	scaf98	74347	87090	+	1971	-	GO:0004445;GO:0016787;GO:0016787;GO:0046856;GO:0046856;	-	-	-	-	-	-
BGIBMGA006280	68.8787	25.7671	111.99	4.34626	2.11977	6.36734e-08	4.77878e-06	scaf49	1258263	1259038	-	192	CECA	GO:0002376;GO:0005576;GO:0005576;GO:0005576;GO:0019731;GO:0019731;GO:0042742;GO:0045087;GO:0045087;	-	-	-	-	Cecropin-A [Source:UniProtKB/Swiss-Prot;Acc:Q27239]	-
BGIBMGA011217	45.0705	12.277	77.864	6.34227	2.665	6.63764e-08	4.95334e-06	scaf12	4393693	4419225	-	2085	-	GO:0006629;GO:0006629;GO:0016491;GO:0055114;GO:0080019;GO:0080019;GO:0102965;GO:0102965;	-	-	-	-	-	-
BGIBMGA002314	17.0829	0.513429	33.6524	65.5444	6.0344	7.21126e-08	5.351e-06	scaf34	1765228	1765974	+	747	-	-	-	-	-	-	-	101739569
BGIBMGA004606	17.0709	0.47618	33.6656	70.6993	6.14362	7.25251e-08	5.35137e-06	scaf48	2714653	2715159	+	507	-	GO:0046872;	K09542	-	-	-	-	101745277
BGIBMGA006308	256.872	88.4316	425.311	4.8095	2.26589	7.33844e-08	5.38453e-06	scaf49	1139807	1172552	+	3645	-	GO:0005515;	-	-	-	-	-	-
BGIBMGA008161	449.931	142.028	757.835	5.33583	2.41571	7.63385e-08	5.57016e-06	scaf52	227977	228771	-	795	-	GO:0016020;GO:0016021;GO:0016021;GO:0016021;	-	-	-	-	-	101736086
BGIBMGA007714	23.531	2.3809	44.6811	18.7665	4.23009	8.68546e-08	6.30248e-06	scaf3	2207950	2213707	-	690	-	-	-	-	-	-	-	-
BGIBMGA010844	108.612	42.9629	174.261	4.05609	2.02009	9.34791e-08	6.70904e-06	scaf25	4427330	4432480	+	612	-	GO:0004984;GO:0004984;GO:0005549;GO:0005549;GO:0007165;GO:0007608;GO:0007608;GO:0007608;GO:0016020;GO:0016020;GO:0016020;GO:0016021;GO:0016021;GO:0050896;GO:0050911;	-	-	-	-	-	-
BGIBMGA003703	176.194	97.0935	255.294	2.62937	1.39472	1.18217e-07	8.38452e-06	scaf9	5472627	5482036	+	3630	-	GO:0005515;	-	-	-	-	-	-
BGIBMGA000610	19.8577	1.50304	38.2123	25.4234	4.66808	1.39153e-07	9.67001e-06	scaf8	254914	256146	+	1233	-	-	-	-	-	-	-	-
BGIBMGA008106	381.309	149.489	613.13	4.10149	2.03615	1.44952e-07	1.002e-05	scaf87	188529	198168	+	2349	-	GO:0003677;GO:0003677;	-	-	-	-	-	-
BGIBMGA010647	14.0591	0	28.1183	Inf	Inf	1.72742e-07	1.18166e-05	scaf84	134928	138328	+	717	-	-	-	-	-	-	-	-
BGIBMGA008375	66.1075	16.2354	115.98	7.14361	2.83665	1.82786e-07	1.23748e-05	scaf2	2563568	2568780	-	3015	-	GO:0005267;GO:0005267;GO:0006811;GO:0016020;GO:0016020;GO:0016020;GO:0016021;GO:0016021;GO:0071805;GO:0071805;	-	-	-	-	-	-
BGIBMGA008710	22.3395	2.4554	42.2236	17.1962	4.10402	1.91731e-07	1.2848e-05	scaf90	422237	426078	+	309	-	-	-	-	-	-	-	-
BGIBMGA006322	53.8411	18.2891	89.3931	4.88777	2.28918	2.22003e-07	1.45064e-05	scaf49	1670887	1675983	+	816	-	GO:0004383;GO:0004383;GO:0005622;GO:0005622;GO:0006182;GO:0006182;GO:0009190;GO:0009190;GO:0016849;GO:0016849;GO:0035556;GO:0035556;	-	-	-	-	-	-
BGIBMGA013623	224.082	132.161	316.003	2.39105	1.25764	2.44465e-07	1.58168e-05	scaf78	548545	551042	+	321	-	GO:0006368;GO:0006368;GO:0030891;GO:0030891;GO:0070449;GO:0070449;	-	-	-	-	-	-
BGIBMGA001473	1064.91	210.943	1918.87	9.09664	3.18533	2.93498e-07	1.87127e-05	scaf7	418567	433423	-	2304	-	GO:0005215;GO:0005215;GO:0006811;GO:0006811;GO:0016020;GO:0016020;GO:0016020;GO:0016021;GO:0016021;GO:0055085;GO:0055085;	-	-	-	-	-	-
BGIBMGA009376	535.612	53.3191	1017.91	19.0908	4.25481	3.20479e-07	2.02364e-05	scaf53	1921994	1924630	+	1278	-	GO:0005215;GO:0005215;GO:0016020;GO:0016021;GO:0016021;GO:0016021;GO:0022857;GO:0022857;GO:0055085;GO:0055085;	-	-	-	-	-	-
BGIBMGA011735	468.053	309.003	627.104	2.02944	1.02108	3.24304e-07	2.038e-05	scaf16	366450	371905	-	1767	-	GO:0003676;GO:0003676;GO:0003723;GO:0003723;GO:0007624;GO:0007624;GO:0009897;GO:0009897;GO:0016491;GO:0016491;GO:0055114;	-	-	-	-	-	-
BGIBMGA004385	32.9511	7.58969	58.3125	7.68312	2.94169	3.62024e-07	2.24284e-05	scaf37	2279326	2280207	-	882	-	GO:0005576;GO:0005576;	-	-	-	-	-	-
BGIBMGA009732	131.898	69.3763	194.419	2.80238	1.48665	4.38137e-07	2.64416e-05	scaf27	551930	553655	+	1089	-	GO:0005634;GO:0005634;GO:0006338;GO:0006338;	-	-	-	-	-	-
BGIBMGA007186	152.53	70.2834	234.777	3.34044	1.74004	4.53584e-07	2.70789e-05	scaf74	13087	16744	-	2931	-	-	-	-	-	-	-	-
BGIBMGA007804	423.564	136.662	710.466	5.19872	2.37816	5.16305e-07	3.00051e-05	scaf3	1504945	1520164	+	1563	-	GO:0004222;GO:0004222;GO:0006508;GO:0006508;GO:0006508;GO:0008233;GO:0008237;GO:0008237;GO:0008237;GO:0008270;GO:0008270;GO:0016787;GO:0031012;GO:0031012;GO:0046872;	-	-	-	-	-	-
BGIBMGA002414	49.6992	17.0096	82.3888	4.84366	2.2761	5.66709e-07	3.26454e-05	scaf14	2300198	2306007	-	732	-	GO:0005515;	-	-	-	-	-	101746587
BGIBMGA013204	244.047	148.343	339.75	2.29031	1.19554	6.4164e-07	3.64818e-05	scaf39	158652	162235	-	1755	-	GO:0003723;GO:0003723;	-	-	-	-	-	-
BGIBMGA014097	51.669	0.47618	102.862	216.014	7.75498	6.46172e-07	3.65811e-05	scaf528	11526	12377	+	852	-	GO:0005576;GO:0005576;	-	-	-	-	-	-
BGIBMGA006498	70.9602	29.9037	112.017	3.74591	1.90532	7.37503e-07	4.05648e-05	scaf11	4188824	4189197	+	300	-	-	-	-	-	-	-	-
BGIBMGA000177	1325.33	691.363	1959.31	2.83397	1.50283	7.96503e-07	4.34078e-05	scaf154	15270	16340	-	642	-	GO:0016020;GO:0016021;GO:0016021;	K17966	-	-	-	-	101745764
BGIBMGA007903	156.491	82.2332	230.749	2.80603	1.48853	8.76116e-07	4.6967e-05	scaf3	5844908	5846314	+	1407	-	GO:0003676;GO:0003676;GO:0003677;GO:0003677;	-	-	-	-	-	101739834
BGIBMGA013005	2837.24	414.034	5260.45	12.7053	3.66736	9.22877e-07	4.88742e-05	scaf4	4592193	4595976	+	1812	-	GO:0016614;GO:0016614;GO:0050660;GO:0050660;GO:0055114;GO:0055114;	-	-	-	-	-	-
BGIBMGA010713	25.2777	4.36012	46.1953	10.595	3.40531	9.303e-07	4.88742e-05	scaf25	4292919	4324576	-	2265	-	GO:0000166;GO:0000166;GO:0004383;GO:0004383;GO:0005622;GO:0005622;GO:0006182;GO:0006182;GO:0009190;GO:0009190;GO:0016829;GO:0016849;GO:0016849;GO:0020037;GO:0020037;GO:0035556;GO:0035556;	-	-	-	-	-	-
BGIBMGA007757	252.743	158.644	346.843	2.1863	1.12849	1.14575e-06	5.9245e-05	scaf3	405320	410329	-	708	-	GO:0015267;GO:0015267;GO:0016020;GO:0016020;GO:0016020;GO:0016021;GO:0016021;GO:0055085;GO:0055085;	-	-	-	-	-	-
BGIBMGA010922	154.855	57.65	252.059	4.37224	2.12837	1.2593e-06	6.48613e-05	scaf68	1230610	1233139	-	756	-	GO:0006629;GO:0006631;GO:0006633;GO:0006633;GO:0016020;GO:0016021;GO:0016021;GO:0016021;GO:0016740;GO:0102336;GO:0102336;GO:0102337;GO:0102337;GO:0102338;GO:0102338;GO:0102756;GO:0102756;	-	-	-	-	-	-
BGIBMGA011575	466.813	25.8335	907.793	35.1401	5.13505	1.29022e-06	6.61946e-05	scaf22	3636219	3637520	+	504	-	-	-	-	-	-	-	-
BGIBMGA009544	163.415	32.0772	294.753	9.18887	3.19989	1.45796e-06	7.45091e-05	scaf153	130684	141782	+	1905	-	GO:0016787;GO:0016787;	-	-	-	-	-	-
BGIBMGA000582	263.975	166.528	361.422	2.17033	1.11792	1.51538e-06	7.68456e-05	scaf8	1329639	1333212	-	1647	-	GO:0016020;GO:0016021;GO:0016021;	-	-	-	-	-	101744139
BGIBMGA005213	217.622	133.746	301.498	2.25426	1.17265	1.54019e-06	7.75051e-05	scaf119	565015	566916	+	318	-	GO:0003676;GO:0003676;GO:0003723;GO:0003723;	-	-	-	-	-	-
BGIBMGA001087	196.624	118.447	274.802	2.32004	1.21415	1.82247e-06	9.0326e-05	scaf1	216376	216615	+	240	-	-	-	-	-	-	-	-
BGIBMGA002947	274.19	175.145	373.236	2.13101	1.09154	1.91344e-06	9.41242e-05	scaf13	6653191	6655767	-	2478	-	GO:0003676;GO:0003676;GO:0006139;GO:0006139;GO:0008408;GO:0008408;GO:0090305;	-	-	-	-	-	-
BGIBMGA008908	51.4943	19.1298	83.8589	4.38369	2.13215	1.95989e-06	9.52534e-05	scaf17	1847596	1850186	-	597	-	-	-	-	-	-	-	-
BGIBMGA002287	25.8297	3.37051	48.2888	14.3269	3.84065	2.20718e-06	0.000106187	scaf34	149079	150712	-	996	-	GO:0004930;GO:0004930;GO:0004930;GO:0004935;GO:0004935;GO:0007165;GO:0007186;GO:0007186;GO:0007186;GO:0016020;GO:0016021;GO:0016021;GO:0016021;GO:0071875;	-	-	-	-	-	-
BGIBMGA009030	18.2953	1.94197	34.6486	17.842	4.15721	2.22865e-06	0.000106829	scaf17	5361761	5363595	+	1005	-	GO:0046872;GO:0046872;	-	-	-	-	-	-
BGIBMGA013004	13.5468	0.47618	26.6174	55.8977	5.80472	2.86913e-06	0.000135634	scaf4	4537549	4539461	+	228	-	-	-	-	-	-	-	-
BGIBMGA001789	105.933	55.0748	156.79	2.84686	1.50937	2.92202e-06	0.000137555	scaf35	2325184	2338230	+	2283	-	GO:0008270;GO:0008270;GO:0046872;	-	-	-	-	-	-
BGIBMGA004066	44.7455	15.0676	74.4234	4.93929	2.3043	2.94327e-06	0.00013806	scaf36	299991	300940	+	384	CSP3	-	-	-	-	-	Chemosensory protein 3[Source:UniProtKB/TrEMBL;Acc:Q3LBA2]	692616
BGIBMGA004247	90.7562	45.3358	136.177	3.00373	1.58676	3.27374e-06	0.000151934	scaf150	33242	40677	+	1032	-	GO:0008152;GO:0016020;GO:0016021;GO:0016021;GO:0016746;GO:0016746;	-	-	-	-	-	-
BGIBMGA006716	15.0488	0.95236	29.1453	30.6032	4.93561	3.33394e-06	0.000153642	scaf10	3404604	3417571	+	2124	-	GO:0007155;GO:0007155;GO:0007155;GO:0007229;GO:0007229;GO:0008305;GO:0008305;GO:0016020;GO:0016021;	-	-	-	-	-	-
BGIBMGA011100	11.2965	0	22.5929	Inf	Inf	3.7245e-06	0.000170051	scaf187	23276	33517	-	1557	-	GO:0005515;GO:0016020;GO:0016021;GO:0016021;	-	-	-	-	-	-
BGIBMGA010036	11.2943	0	22.5885	Inf	Inf	3.72884e-06	0.000170051	scaf45	124384	125232	-	849	-	GO:0005515;	-	-	-	-	-	105842978
BGIBMGA010213	153.173	89.3467	216.998	2.42872	1.2802	3.9655e-06	0.000178979	scaf15	2062793	2068227	+	951	-	GO:0005615;GO:0005615;	-	-	-	-	-	-
BGIBMGA007113	79.1748	37.7088	120.641	3.19927	1.67774	4.03868e-06	0.000181658	scaf21	4048903	4051771	+	438	-	-	-	-	-	-	-	-
BGIBMGA003171	583.242	247.73	918.755	3.7087	1.89091	4.20131e-06	0.000188328	scaf13	4579316	4594025	+	2244	-	GO:0003810;GO:0003810;GO:0018149;GO:0018149;GO:0046872;GO:0046872;	K05619	EC:2.3.2.13	-	-	-	101738407
BGIBMGA013971	149.349	84.2577	214.44	2.54505	1.34769	4.4938e-06	0.000200073	scaf29	1659544	1661829	+	1263	-	-	-	-	-	-	-	101744771
BGIBMGA013245	127.816	71.6455	183.987	2.56802	1.36066	4.73054e-06	0.000209902	scaf39	1826783	1836012	+	1248	-	GO:0016787;GO:0016787;GO:0016787;	-	-	-	-	-	-
BGIBMGA009067	21.0744	3.44501	38.7038	11.2348	3.4899	4.80068e-06	0.000211584	scaf63	1128396	1129856	-	675	-	-	-	-	-	-	-	-
BGIBMGA013865	26.2301	5.75141	46.7088	8.12127	3.02171	4.98987e-06	0.000218456	scaf62	1043361	1045591	+	516	BGLOV2	-	-	-	-	-	Antibacterial peptide; Gloverin4[Source:UniProtKB/TrEMBL;Acc:Q2WGL0]	692477
BGIBMGA001130	143.448	52.9174	233.978	4.42157	2.14456	5.23878e-06	0.000227083	scaf1	4638260	4660819	+	1062	-	GO:0006812;GO:0006812;GO:0008324;GO:0008324;GO:0016020;GO:0016021;GO:0016021;GO:0016021;GO:0055085;GO:0055085;GO:0098655;	-	-	-	-	-	-
BGIBMGA003883	14.3093	0.95236	27.6663	29.0503	4.86048	7.00069e-06	0.000290394	scaf72	155177	157251	+	1092	-	-	-	-	-	-	-	-
BGIBMGA008100	797.521	477.622	1117.42	2.33955	1.22623	7.00889e-06	0.000290394	scaf87	582593	583899	-	372	-	-	-	-	-	-	-	-
BGIBMGA001117	545.362	359.842	730.883	2.03112	1.02228	7.0621e-06	0.000291678	scaf1	3815166	3824861	+	1818	-	-	-	-	-	-	-	-
BGIBMGA001001	33.9619	10.1115	57.8122	5.71745	2.51537	7.68103e-06	0.00031233	scaf1	6071748	6072329	-	582	-	GO:0003677;GO:0003677;GO:0006357;GO:0006357;GO:0046983;GO:0046983;	-	-	-	-	-	-
BGIBMGA000954	92.8603	48.5654	137.155	2.82414	1.49781	7.74429e-06	0.00031393	scaf1	8669797	8671527	-	261	-	-	-	-	-	-	-	-
BGIBMGA008322	34.7517	10.6995	58.804	5.49598	2.45838	8.25868e-06	0.000332441	scaf2	8442304	8442519	-	216	-	GO:0016020;GO:0016021;GO:0016021;GO:0016021;	-	-	-	-	-	-
BGIBMGA009127	154.979	93.3585	216.599	2.32008	1.21417	8.38757e-06	0.00033484	scaf96	1027154	1032753	-	1419	-	-	-	-	-	-	-	-
BGIBMGA014004	16.8086	1.97922	31.638	15.9851	3.99866	8.78396e-06	0.000349602	scaf29	3611870	3621515	+	585	-	-	-	-	-	-	-	-
BGIBMGA011112	80.7963	40.0525	121.54	3.03452	1.60147	9.12068e-06	0.000359733	scaf95	1048964	1051675	-	540	-	-	-	-	-	-	-	-
BGIBMGA001118	373.077	188.685	557.468	2.95449	1.56291	9.58235e-06	0.000374554	scaf1	3831478	3840079	+	825	-	GO:0000287;GO:0000287;GO:0005737;GO:0005737;GO:0008253;GO:0008253;GO:0016311;	-	-	-	-	-	-
BGIBMGA002910	30.0996	8.4303	51.769	6.14082	2.61843	9.87407e-06	0.000383687	scaf30	2480629	2482323	+	1695	-	GO:0008271;GO:0008271;GO:0008271;GO:0008272;GO:0008272;GO:0015116;GO:0015116;GO:0016020;GO:0016020;GO:0016020;GO:0016021;GO:0016021;GO:0016021;GO:0055085;GO:0055085;GO:1902358;	-	-	-	-	-	-
BGIBMGA014117	894.588	539.14	1250.04	2.31858	1.21324	1.0144e-05	0.000390716	scaf76	70699	75695	-	690	-	GO:0016311;GO:0016791;GO:0016791;	-	-	-	-	-	-
BGIBMGA001911	178.012	110.911	245.112	2.21	1.14404	1.08126e-05	0.000415241	scaf28	347305	348291	+	987	-	GO:0016020;GO:0016021;GO:0016021;GO:0016021;GO:0055085;GO:0055085;	-	-	-	-	-	-
BGIBMGA007777	147.102	87.6947	206.51	2.35487	1.23565	1.16576e-05	0.000446386	scaf3	472925	478767	+	870	-	-	-	-	-	-	-	-
BGIBMGA011180	461.005	284.557	637.452	2.24015	1.1636	1.32872e-05	0.000507307	scaf12	6343250	6347182	-	2592	BMO.722	GO:0000139;GO:0000139;GO:0005198;GO:0005198;GO:0005737;GO:0005794;GO:0006886;GO:0006886;GO:0015031;GO:0016020;GO:0016192;GO:0016192;GO:0016192;GO:0030117;GO:0030117;GO:0030126;GO:0030126;GO:0030663;GO:0031410;	K17267	-	-	-	Coatomer subunit gamma[Source:UniProtKB/TrEMBL;Acc:H9JNS6]	692402
BGIBMGA010908	46.2312	18.1402	74.3223	4.09712	2.03461	1.37962e-05	0.000523696	scaf195	44377	45666	-	1290	-	GO:0005634;GO:0005634;GO:0005737;GO:0005739;GO:0005759;GO:0005759;GO:0008033;GO:0008168;GO:0009019;GO:0009019;GO:0009019;GO:0016740;GO:0030488;GO:0030488;GO:0030488;GO:0032259;GO:0052906;GO:0052906;	-	-	-	-	tRNA (guanine(37)-N1)-methyltransferase[Source:UniProtKB/TrEMBL;Acc:H9JN05]	-
BGIBMGA003920	20.8593	4.03294	37.6857	9.34447	3.22411	1.43119e-05	0.000538602	scaf114	253061	254981	+	1032	-	GO:0005576;GO:0005576;GO:0052689;GO:0052689;	K19404	EC:3.1.1.-	-	-	-	101740870
BGIBMGA009065	61.4388	28.3715	94.506	3.33102	1.73596	1.56016e-05	0.000580486	scaf63	1165722	1170415	-	3069	-	GO:0005515;	-	-	-	-	-	-
BGIBMGA009872	17.3791	2.56715	32.1911	12.5396	3.64842	1.63349e-05	0.000603942	scaf51	171878	192917	+	1680	-	GO:0003824;GO:0003824;GO:0004035;GO:0004035;GO:0016311;GO:0016787;GO:0016791;GO:0016791;	-	-	-	-	Alkaline phosphatase[Source:UniProtKB/TrEMBL;Acc:H9JK21]	-
BGIBMGA005696	36.8703	0.989609	72.7511	73.5149	6.19997	1.637e-05	0.000603942	scaf143	396817	398283	-	1467	BMSUC1	GO:0004553;GO:0004553;GO:0004564;GO:0004564;GO:0004564;GO:0005737;GO:0005737;GO:0005975;GO:0005975;GO:0008152;GO:0016787;GO:0016798;	-	-	-	-	Beta-fructofuranosidase[Source:UniProtKB/TrEMBL;Acc:B2DD57]	100145905
BGIBMGA013793	14.7866	1.42854	28.1447	19.7017	4.30025	1.70643e-05	0.000626041	scaf47	1685152	1692120	+	1188	-	GO:0003824;GO:0003824;GO:0005783;GO:0005789;GO:0005789;GO:0016020;GO:0016787;GO:0019439;GO:0019439;GO:0033961;GO:0033961;GO:0033961;	-	-	-	-	-	-
BGIBMGA008907	28.2751	7.80513	48.7451	6.24527	2.64276	1.7776e-05	0.000650332	scaf17	1896234	1896870	-	273	-	GO:0003677;GO:0003677;GO:0003700;GO:0003700;GO:0005524;GO:0005524;GO:0005634;GO:0005634;GO:0006355;GO:0006355;	-	-	-	-	-	-
BGIBMGA013831	453.338	15.2086	891.467	58.6161	5.87322	1.80668e-05	0.000659137	scaf62	923862	928783	-	1737	-	GO:0008152;GO:0016020;GO:0016021;GO:0016021;GO:0016740;GO:0016757;GO:0016758;GO:0016758;	-	-	-	-	-	-
BGIBMGA003771	190.628	121.416	259.841	2.14009	1.09767	1.84917e-05	0.000671124	scaf91	157823	168260	-	1200	-	GO:0006629;GO:0006629;GO:0008374;GO:0008374;	-	-	-	-	-	-
BGIBMGA003293	5050.26	2023.71	8076.81	3.99108	1.99678	1.84975e-05	0.000671124	scaf42	3801476	3804918	-	1467	CYP337A2	GO:0004497;GO:0004497;GO:0005506;GO:0005506;GO:0016491;GO:0016705;GO:0016705;GO:0020037;GO:0020037;GO:0046872;GO:0055114;GO:0055114;GO:0055114;	K14999	EC:1.14.-.-	-	-	Cytochrome P450[Source:UniProtKB/TrEMBL;Acc:H9J1A6]	101739293
BGIBMGA011483	120.511	70.2542	170.768	2.43072	1.28138	2.27772e-05	0.00080635	scaf22	1139263	1140291	-	1029	-	GO:0016787;GO:0016787;	-	-	-	-	-	-
BGIBMGA008795	77.2333	39.8824	114.584	2.87306	1.52259	2.33183e-05	0.000822377	scaf115	734504	737865	+	2799	-	GO:0003676;GO:0003676;	-	-	-	-	-	-
BGIBMGA011813	124.644	73.8935	175.394	2.3736	1.24708	2.46188e-05	0.000855407	scaf16	2338958	2344877	+	1071	-	GO:0003824;GO:0003824;GO:0009058;GO:0009058;	-	-	-	-	-	-
BGIBMGA004775	162.068	83.0738	241.062	2.90177	1.53694	3.15447e-05	0.00105691	scaf57	1599790	1601872	+	636	-	GO:0016787;GO:0016787;GO:0016818;GO:0016818;GO:0046872;GO:0046872;	K08077	EC:3.6.1.45	-	-	-	101741144
BGIBMGA007391	60.3975	28.8477	91.9474	3.18734	1.67235	3.40943e-05	0.00113079	scaf55	364401	371599	+	1434	-	GO:0003824;GO:0003824;GO:0009058;GO:0009058;GO:0030170;GO:0030170;	K00825	-	-	-	-	101738563
BGIBMGA009690	54.0145	19.167	88.862	4.63619	2.21294	3.53648e-05	0.00116996	scaf27	1114732	1123034	-	885	-	GO:0016020;GO:0016021;GO:0016021;GO:0016021;	-	-	-	-	-	101745264
BGIBMGA004340	472.649	196.717	748.582	3.80538	1.92804	3.6396e-05	0.00119806	scaf79	1307756	1309383	+	327	-	GO:0005576;GO:0005576;GO:0010466;GO:0030414;GO:0030414;	-	-	-	-	-	-
BGIBMGA000419	178.111	115.055	241.167	2.09609	1.0677	3.72102e-05	0.0012218	scaf18	2737892	2745506	+	972	-	GO:0003857;GO:0003857;GO:0006631;GO:0006631;GO:0016491;GO:0016491;GO:0055114;GO:0055114;GO:0070403;GO:0070403;	K13247	EC:1.1.1.45	-	-	-	101740023
BGIBMGA008134	181.314	117.383	245.244	2.08927	1.063	4.53057e-05	0.00145844	scaf52	1719696	1719995	-	300	-	-	-	-	-	-	-	-
BGIBMGA003969	25.8481	7.44069	44.2556	5.94778	2.57235	5.22539e-05	0.00165774	scaf36	4009308	4012175	-	399	-	GO:0016020;GO:0016021;GO:0016021;	-	-	-	-	-	-
BGIBMGA008415	1030.31	572.983	1487.64	2.5963	1.37646	5.94323e-05	0.00185412	scaf2	479588	485797	+	801	-	GO:0016020;GO:0016021;GO:0016021;GO:0022857;GO:0022857;GO:0055085;GO:0055085;	-	-	-	-	-	-
BGIBMGA000178	96.1873	54.7104	137.664	2.51624	1.33127	6.28807e-05	0.00194324	scaf154	1225	9773	+	858	-	GO:0016020;GO:0016021;GO:0016021;GO:0016021;GO:0055085;GO:0055085;	-	-	-	-	-	-
BGIBMGA005682	125.315	77.1976	173.432	2.2466	1.16774	6.68459e-05	0.00203702	scaf33	3891167	3896243	+	1242	-	GO:0005887;GO:0005887;GO:0016020;GO:0016021;GO:0016021;	-	-	-	-	-	-
BGIBMGA002771	73.7498	39.4062	108.093	2.74306	1.45579	6.87816e-05	0.00207083	scaf30	4423548	4432643	-	2460	-	-	-	-	-	-	-	-
BGIBMGA013059	107.531	63.8112	151.252	2.3703	1.24507	7.14256e-05	0.00213691	scaf4	6863849	6865506	+	1113	-	-	-	-	-	-	-	-
BGIBMGA001219	594.132	359.167	829.097	2.30839	1.20689	7.38152e-05	0.00219341	scaf1	10226311	10239841	+	1032	-	-	-	-	-	-	-	-
BGIBMGA006690	155.763	91.0733	220.452	2.4206	1.27537	8.37203e-05	0.00242199	scaf10	2199404	2205843	+	993	-	-	-	-	-	-	-	-
BGIBMGA008695	10.0501	0.513429	19.5867	38.1488	5.25356	0.000111897	0.00311367	scaf90	101843	102178	-	336	-	-	-	-	-	-	-	-
BGIBMGA010285	23.8338	6.92727	40.7402	5.88114	2.5561	0.000112269	0.00311743	scaf15	5510257	5511213	+	957	-	GO:0003824;GO:0003824;GO:0050662;GO:0050662;	-	-	-	-	-	101738995
BGIBMGA000812	148.023	94.6673	201.379	2.12723	1.08898	0.000118499	0.00325599	scaf89	981916	983889	+	1974	-	GO:0005515;	-	-	-	-	-	-
BGIBMGA011266	63.2193	32.9551	93.4835	2.83669	1.50421	0.000120099	0.00327938	scaf12	2400318	2405086	-	2244	SP1	-	-	-	-	-	Sex-specific storage-protein 1[Source:UniProtKB/Swiss-Prot;Acc:P09179]	-
BGIBMGA006321	36.709	14.6579	58.7601	4.00877	2.00316	0.000120759	0.00328148	scaf49	1656756	1669293	+	720	-	GO:0004383;GO:0004383;GO:0006182;GO:0006182;GO:0020037;GO:0020037;	-	-	-	-	-	-
BGIBMGA005571	225.725	150.115	301.336	2.00737	1.00531	0.00012496	0.003377	scaf33	1705755	1711929	-	735	-	GO:0003676;GO:0003676;	-	-	-	-	-	-
BGIBMGA013782	799.035	426.055	1172.01	2.75085	1.45988	0.000134404	0.00355185	scaf47	566821	567177	+	357	-	-	-	-	-	-	-	101746461
BGIBMGA003381	11.2811	0.95236	21.6099	22.6909	4.50404	0.00013739	0.0036162	scaf42	244093	245155	+	219	-	-	-	-	-	-	-	-
BGIBMGA000304	112.675	69.5334	155.816	2.24088	1.16407	0.000140486	0.0036779	scaf18	1714624	1716365	-	543	-	GO:0016180;GO:0016180;GO:0046872;GO:0046872;	-	-	-	-	-	-
BGIBMGA012764	67.6191	36.1766	99.0616	2.73828	1.45327	0.000140575	0.0036779	scaf4	8755222	8771020	-	1914	-	GO:0016491;GO:0016491;GO:0046872;GO:0046872;GO:0055114;	-	-	-	-	-	-
BGIBMGA010427	73.9665	39.9408	107.992	2.70381	1.435	0.000146403	0.00381519	scaf6	3134812	3135398	-	153	-	-	-	-	-	-	-	-
BGIBMGA010933	2934.93	1396.91	4472.94	3.20202	1.67898	0.00015882	0.00409008	scaf68	173739	183779	-	2052	-	GO:0016020;GO:0016021;GO:0016021;GO:0016021;GO:0055085;GO:0055085;	-	-	-	-	-	-
BGIBMGA012394	257.07	165.19	348.949	2.11241	1.07889	0.00016075	0.00412361	scaf82	1423873	1424400	+	528	-	-	-	-	-	-	-	-
BGIBMGA006993	1237.24	772.059	1702.41	2.20503	1.1408	0.000162886	0.00416215	scaf21	4033812	4045494	-	1299	-	GO:0016311;GO:0016791;GO:0016791;	-	-	-	-	-	-
BGIBMGA008698	13.5084	1.90472	25.112	13.1841	3.72073	0.00016842	0.00427858	scaf90	86809	87440	-	522	-	-	-	-	-	-	-	-
BGIBMGA003343	271.677	165.211	378.142	2.28884	1.19461	0.000170529	0.00430717	scaf42	1263802	1266079	-	1635	-	-	-	-	-	-	-	101744109
BGIBMGA011525	316.653	170.362	462.944	2.71742	1.44224	0.000170942	0.00430932	scaf22	783747	788277	+	2997	-	-	-	-	-	-	-	-
BGIBMGA001793	8.52939	0	17.0588	Inf	Inf	0.000173798	0.00435622	scaf35	2466446	2476567	+	2304	-	-	-	-	-	-	-	-
BGIBMGA006501	107.602	65.9313	149.272	2.26406	1.17891	0.000179649	0.00447725	scaf11	4233503	4243411	+	4131	-	-	-	-	-	-	-	-
BGIBMGA001847	86.8688	50.2093	123.528	2.46026	1.29881	0.00019699	0.00480013	scaf28	4019052	4034418	-	1815	-	GO:0009966;GO:0009966;GO:0016020;GO:0016020;GO:0016020;GO:0016021;GO:0016021;	-	-	-	-	-	-
BGIBMGA004001	114.973	71.72	158.225	2.20615	1.14153	0.000199005	0.0048313	scaf36	2925047	2926417	-	1371	HMG-S_BM	GO:0003824;GO:0003824;GO:0004421;GO:0004421;GO:0004421;GO:0006629;GO:0006694;GO:0008202;GO:0008299;GO:0008299;GO:0016126;GO:0016126;GO:0016740;GO:0016746;	K01641	EC:2.3.3.10	-	-	3-hydroxy-3-methylglutaryl-CoA synthase[Source:UniProtKB/TrEMBL;Acc:A5A798]	100101203
BGIBMGA013227	146.791	96.6173	196.964	2.0386	1.02758	0.000204308	0.00494178	scaf39	1256977	1269360	+	1866	-	GO:0005634;GO:0005634;GO:0006508;GO:0006508;GO:0008233;GO:0008233;	-	-	-	-	-	-
BGIBMGA012996	27.0681	9.41991	44.7163	4.747	2.24702	0.000215146	0.00515643	scaf4	4308042	4318747	+	4215	-	GO:0016614;GO:0016614;GO:0050660;GO:0050660;GO:0055114;GO:0055114;	-	-	-	-	-	-
BGIBMGA005440	39.6299	6.30209	72.9577	11.5767	3.53316	0.000220031	0.00523529	scaf19	1472765	1477146	+	666	-	-	-	-	-	-	-	-
BGIBMGA010948	121.599	67.6951	175.504	2.59256	1.37438	0.000234584	0.00549204	scaf68	1954424	1958837	+	2187	-	-	-	-	-	-	-	100327241
BGIBMGA011066	4410.14	2110.6	6709.68	3.17905	1.66859	0.000235863	0.00551214	scaf31	684207	684410	+	204	-	-	-	-	-	-	-	101747015
BGIBMGA005897	9980.99	3885.25	16076.7	4.13789	2.04889	0.000237572	0.00554222	scaf67	1375584	1378281	+	864	-	GO:0003824;GO:0003824;GO:0006596;GO:0006596;GO:0016740;GO:0016740;	K00797	EC:2.5.1.16	-	-	-	101742094
BGIBMGA003382	9.28317	0.47618	18.0902	37.9902	5.24755	0.000246558	0.00573148	scaf42	247341	248172	+	750	-	-	-	-	-	-	-	-
BGIBMGA002254	28.3496	4.50912	52.1901	11.5744	3.53286	0.000253941	0.0058611	scaf34	2836382	2837940	-	570	-	-	-	-	-	-	-	-
BGIBMGA009418	969.472	459.563	1479.38	3.2191	1.68666	0.000254163	0.0058611	scaf81	773624	774784	+	1161	-	GO:0016020;GO:0016021;GO:0016021;GO:0016021;	-	-	-	-	-	-
BGIBMGA005602	60.1343	30.7524	89.5162	2.91087	1.54145	0.000258619	0.0059176	scaf33	97098	102123	+	1482	-	GO:0004553;GO:0004553;GO:0005975;GO:0005975;	-	-	-	-	-	-
BGIBMGA001860	34.1622	10.5958	57.7287	5.44828	2.4458	0.00028767	0.00650303	scaf28	2983851	2999620	-	537	-	-	-	-	-	-	-	-
BGIBMGA011135	15.006	2.89433	27.1177	9.36924	3.22793	0.000292783	0.00657759	scaf95	117684	118148	+	261	-	GO:0016020;GO:0016021;GO:0016021;	-	-	-	-	-	-
BGIBMGA005306	1698.5	1069.73	2327.26	2.17555	1.12138	0.000302462	0.00676752	scaf19	5092746	5121809	-	2391	-	GO:0005515;GO:0016020;GO:0016021;GO:0016021;	-	-	-	-	-	-
BGIBMGA001938	145.812	96.7129	194.91	2.01535	1.01103	0.000314536	0.00701377	scaf28	2046256	2050259	+	804	-	GO:0006479;GO:0006479;GO:0008168;GO:0008168;GO:0008168;GO:0016740;GO:0032259;	-	-	-	-	-	-
BGIBMGA008297	18.021	3.92119	32.1207	8.19158	3.03414	0.000374141	0.00816274	scaf2	10915573	10927483	-	1383	-	-	-	-	-	-	-	-
BGIBMGA008333	13.5401	0.989609	26.0907	26.3646	4.72053	0.000380149	0.00826636	scaf2	6559432	6560277	-	846	BMORCPR10	GO:0042302;GO:0042302;GO:0042302;	-	-	-	-	Putative cuticle protein[Source:UniProtKB/TrEMBL;Acc:C0H6K1]	100379456
BGIBMGA011335	30.713	12.2025	49.2235	4.03389	2.01217	0.000395042	0.00850571	scaf12	2159105	2160588	+	801	-	-	-	-	-	-	-	-
BGIBMGA003541	113.205	67.7243	158.686	2.34312	1.22843	0.000445122	0.00938401	scaf9	2551534	2553778	-	1503	-	-	-	-	-	-	-	-
BGIBMGA004566	56.9285	30.4544	83.4026	2.73861	1.45344	0.000451885	0.00948986	scaf48	974298	975383	-	1086	-	GO:0016020;GO:0016021;GO:0016021;GO:0016021;GO:0022857;GO:0022857;GO:0055085;GO:0055085;	-	-	-	-	-	-
BGIBMGA003458	81.722	25.9161	137.528	5.30666	2.40781	0.000453033	0.00948986	scaf9	7019149	7027132	-	2139	-	-	-	-	-	-	-	-
BGIBMGA009283	7.03946	0	14.0789	Inf	Inf	0.000454161	0.00949833	scaf38	2136136	2138509	+	402	-	-	-	-	-	-	-	-
BGIBMGA005784	63.2132	29.8665	96.56	3.23306	1.6929	0.000455291	0.00950682	scaf54	41801	42337	+	537	-	-	K09542	-	-	-	-	101736792
BGIBMGA004118	10.0512	0.989609	19.1128	19.3134	4.27153	0.000461839	0.00959777	scaf36	2772106	2792618	+	4701	-	GO:0001518;GO:0001518;GO:0001518;GO:0005216;GO:0005216;GO:0005244;GO:0005244;GO:0005248;GO:0005248;GO:0005272;GO:0005515;GO:0005886;GO:0006811;GO:0006811;GO:0006811;GO:0006814;GO:0006814;GO:0006814;GO:0016020;GO:0016020;GO:0016020;GO:0016021;GO:0034220;GO:0034765;GO:0034765;GO:0035725;GO:0055085;GO:0055085;	-	-	-	-	-	-
BGIBMGA005683	82.2003	49.3687	115.032	2.33005	1.22036	0.000478438	0.00990487	scaf33	3903457	3909321	+	720	-	GO:0005887;GO:0005887;GO:0016020;GO:0016021;GO:0016021;GO:0016021;	-	-	-	-	-	-
BGIBMGA013768	94.9879	58.8551	131.121	2.22786	1.15566	0.000487899	0.0100433	scaf47	101209	103046	-	843	-	GO:0016020;GO:0016021;GO:0016021;	-	-	-	-	-	-
BGIBMGA004209	83.3776	50.2093	116.546	2.3212	1.21487	0.000489558	0.0100467	scaf60	2419630	2428881	+	1236	-	-	-	-	-	-	-	-
BGIBMGA007235	33.3877	14.4797	52.2957	3.61165	1.85266	0.000515989	0.0104583	scaf131	62828	66954	-	387	-	-	-	-	-	-	-	-
BGIBMGA013581	33.2047	14.1445	52.2649	3.69508	1.8856	0.000527477	0.0105769	scaf78	964209	965276	-	1068	-	GO:0005267;GO:0005267;GO:0006811;GO:0016020;GO:0016020;GO:0016020;GO:0016021;GO:0016021;GO:0071805;GO:0071805;	K05323	-	-	-	-	101739915
BGIBMGA012080	25.6493	9.60616	41.6925	4.34018	2.11776	0.000533516	0.0106492	scaf24	338465	339242	+	372	-	-	-	-	-	-	-	-
BGIBMGA005844	9.79004	0.989609	18.5905	18.7857	4.23156	0.000591296	0.0115912	scaf125	237259	238127	-	339	-	GO:0005634;GO:0005634;GO:0043565;GO:0043565;	-	-	-	-	-	-
BGIBMGA005167	669.851	425.034	914.668	2.15199	1.10567	0.00059481	0.0116253	scaf32	4025020	4027739	+	792	-	GO:0004497;GO:0004499;GO:0004499;GO:0016491;GO:0050660;GO:0050660;GO:0050661;GO:0050661;GO:0055114;GO:0055114;GO:0055114;	-	-	-	-	-	-
BGIBMGA003909	132.913	88.4608	177.364	2.00501	1.00361	0.00064747	0.0125057	scaf114	448445	450932	-	681	-	GO:0000166;GO:0005524;GO:0005524;GO:0005524;GO:0006139;GO:0006139;GO:0009165;GO:0019206;GO:0019206;	K05961	EC:2.7.1.145	-	-	-	101741300
BGIBMGA001724	9.27985	0	18.5597	Inf	Inf	0.000680081	0.0130293	scaf35	285665	295417	+	1407	-	-	-	-	-	-	-	-
BGIBMGA003324	8.29459	0.513429	16.0758	31.3106	4.96858	0.000693592	0.0131833	scaf42	2452380	2456442	-	477	-	-	-	-	-	-	-	-
BGIBMGA004467	19.8039	1.97922	37.6285	19.0118	4.24882	0.000712709	0.0134687	scaf37	2185815	2186731	+	750	-	GO:0005576;GO:0005576;	-	-	-	-	-	-
BGIBMGA010854	71.13	38.1558	104.104	2.7284	1.44805	0.00072308	0.0135865	scaf61	1990401	1992788	-	1479	-	GO:0004497;GO:0004497;GO:0005506;GO:0005506;GO:0016491;GO:0016705;GO:0016705;GO:0020037;GO:0020037;GO:0046872;GO:0055114;GO:0055114;GO:0055114;	-	-	-	-	-	-
BGIBMGA008167	15.7916	3.92119	27.6619	7.05448	2.81854	0.000737207	0.0138124	scaf52	257693	275087	+	849	-	GO:0006508;GO:0006508;GO:0008236;GO:0008236;	-	-	-	-	-	-
BGIBMGA003128	119.464	78.6392	160.288	2.03827	1.02735	0.0007648	0.0142683	scaf13	3202263	3203047	+	234	-	-	-	-	-	-	-	-
BGIBMGA013549	17.5053	4.87355	30.1371	6.18381	2.6285	0.000771046	0.0143606	scaf284	25596	25814	+	219	-	-	-	-	-	-	-	-
BGIBMGA012679	12.7941	2.4554	23.1328	9.4212	3.23591	0.000804835	0.0148049	scaf69	910811	911969	-	1110	-	-	-	-	-	-	-	-
BGIBMGA004268	66.6405	38.8102	94.4709	2.43418	1.28343	0.000848709	0.0155338	scaf79	1470860	1486154	-	2646	-	GO:0003676;GO:0003676;	K11268	EC:2.3.1.-	-	-	-	101742011
BGIBMGA001912	96.8314	62.5024	131.16	2.09848	1.06935	0.000849191	0.0155338	scaf28	362864	366542	+	315	-	GO:0016020;GO:0016021;GO:0016021;	-	-	-	-	-	-
BGIBMGA011073	76.8594	46.7271	106.992	2.28972	1.19517	0.00091582	0.0166598	scaf31	1231289	1235399	+	1155	-	GO:0005515;	-	-	-	-	-	101736384
BGIBMGA014193	314.485	205.546	423.425	2.06	1.04265	0.000926008	0.0168055	scaf99	1188671	1190266	+	1596	-	GO:0006479;GO:0006479;GO:0008168;GO:0008168;GO:0008168;GO:0016740;GO:0032259;	K05931	EC:2.1.1.319	-	-	-	101737538
BGIBMGA011367	104.442	68.134	140.75	2.06578	1.04668	0.000926388	0.0168055	scaf12	3511134	3514577	+	1704	-	-	-	-	-	-	-	-
BGIBMGA013009	11.5072	1.90472	21.1096	11.0828	3.47025	0.000979287	0.017571	scaf4	4670794	4678169	+	1974	-	GO:0016614;GO:0016614;GO:0050660;GO:0050660;GO:0055114;GO:0055114;	-	-	-	-	-	-
BGIBMGA001859	109.79	72.9412	146.639	2.01037	1.00746	0.00103762	0.0183421	scaf28	3008256	3091445	-	12462	-	GO:0003777;GO:0003777;GO:0005524;GO:0005524;GO:0007018;GO:0007018;GO:0016887;GO:0016887;GO:0030286;GO:0030286;	-	-	-	-	-	-
BGIBMGA004686	46.7117	24.5912	68.8321	2.79905	1.48494	0.00104215	0.0183727	scaf140	359957	373823	+	2082	-	GO:0016020;GO:0016021;GO:0016021;	-	-	-	-	-	-
BGIBMGA003431	109.482	72.7549	146.209	2.00961	1.00692	0.00110937	0.0193242	scaf42	3102003	3113343	+	972	-	GO:0003779;GO:0003779;GO:0007015;GO:0007015;GO:2000601;GO:2000601;	-	-	-	-	-	-
BGIBMGA014420	11.2438	1.90472	20.5829	10.8063	3.4338	0.00122141	0.0206994	scaf198	68847	70516	-	951	-	GO:0003777;GO:0003777;GO:0007018;GO:0007018;	-	-	-	-	-	-
BGIBMGA005869	94.91	61.236	128.584	2.09981	1.07026	0.001237	0.0208827	scaf125	444667	445014	+	348	-	GO:0000811;GO:0000811;GO:0006260;GO:0006260;	-	-	-	-	-	-
BGIBMGA011298	49.0386	26.7567	71.3205	2.66552	1.41442	0.00126219	0.0212245	scaf12	525153	541324	-	1884	-	-	-	-	-	-	-	-
BGIBMGA010408	6.02786	0	12.0557	Inf	Inf	0.00142978	0.0233276	scaf6	4680992	4682796	-	1443	-	-	-	-	-	-	-	101738897
BGIBMGA003160	42.5709	22.3221	62.8197	2.81424	1.49274	0.0014718	0.0238061	scaf13	4347161	4349019	+	1047	-	GO:0003676;GO:0003676;	-	-	-	-	-	-
BGIBMGA007331	238.422	151.423	325.421	2.14908	1.10372	0.00153859	0.0246738	scaf55	2487833	2490314	-	1659	-	GO:0003690;GO:0003697;GO:0005634;GO:0005634;GO:0006260;GO:0006260;GO:0006270;	-	-	-	-	-	-
BGIBMGA002782	8.79163	0.989609	16.5936	16.7679	4.06763	0.00155027	0.0248005	scaf30	3206449	3208612	-	1077	-	GO:0005515;	-	-	-	-	-	105842557
BGIBMGA004366	70.7042	43.4311	97.9774	2.25593	1.17372	0.0016007	0.0254216	scaf37	3449852	3457574	-	546	-	GO:0006750;GO:0006750;GO:0035226;GO:0035226;	-	-	-	-	-	-
BGIBMGA000953	100.734	52.859	148.609	2.81143	1.4913	0.00169534	0.0265394	scaf1	8675164	8675343	-	180	-	-	-	-	-	-	-	-
BGIBMGA001296	721.774	470.875	972.673	2.06567	1.04661	0.00172891	0.0269047	scaf1	15200514	15217202	+	1410	-	GO:0003677;GO:0003700;GO:0003700;GO:0005634;GO:0005634;GO:0005634;GO:0006355;GO:0006355;GO:0043565;GO:0043565;	K09442	-	-	-	-	101746525
BGIBMGA002816	92.5586	60.5444	124.573	2.05755	1.04092	0.00174257	0.027053	scaf30	1592480	1601098	-	891	-	GO:0006355;GO:0006355;	-	-	-	-	-	-
BGIBMGA014098	9.79221	1.50304	18.0814	12.0299	3.58855	0.00176505	0.0271911	scaf528	15978	16880	+	903	-	GO:0005576;GO:0005576;	-	-	-	-	-	101737326
BGIBMGA001058	44.6919	24.0406	65.3432	2.71804	1.44257	0.00182024	0.0278963	scaf1	1736418	1737245	-	294	-	-	-	-	-	-	-	-
BGIBMGA004298	11.7847	2.4554	21.114	8.59901	3.10417	0.00184958	0.0280837	scaf79	604968	613004	-	1143	-	GO:0005515;	-	-	-	-	-	-
BGIBMGA003941	16.2414	4.87355	27.6092	5.66511	2.5021	0.00187599	0.0283535	scaf105	388815	389576	-	762	-	-	K00069	EC:1.1.1.141	-	-	-	101735322
BGIBMGA005442	5.7843	0	11.5686	Inf	Inf	0.00189621	0.0285606	scaf19	1606883	1608667	+	1263	-	GO:0008152;GO:0016020;GO:0016021;GO:0016021;GO:0016740;GO:0016758;GO:0016758;	-	-	-	-	-	-
BGIBMGA010969	5.77551	0	11.551	Inf	Inf	0.00190518	0.02863	scaf83	761737	764291	-	1005	-	GO:0016787;GO:0016787;	-	-	-	-	-	-
BGIBMGA009487	19.0435	0.47618	37.6109	78.9846	6.3035	0.00197912	0.0294381	scaf40	518820	527964	+	1287	-	GO:0004180;GO:0004180;GO:0004181;GO:0004181;GO:0006508;GO:0006508;GO:0008270;GO:0008270;	-	-	-	-	-	-
BGIBMGA011109	20.2011	7.25445	33.1477	4.5693	2.19197	0.00198578	0.0294703	scaf95	1143563	1148570	-	708	-	GO:0016020;GO:0016021;GO:0016021;GO:0016021;	-	-	-	-	-	-
BGIBMGA012206	806.944	533.285	1080.6	2.02632	1.01886	0.00210083	0.030795	scaf75	1563569	1571407	+	1335	-	GO:0005515;GO:0046983;GO:0046983;	-	-	-	-	-	-
BGIBMGA014377	78.742	50.3956	107.088	2.12496	1.08743	0.00215248	0.0312728	scaf155	205746	208559	+	453	-	GO:0005184;GO:0005184;GO:0010469;	-	-	-	-	-	-
BGIBMGA003656	324.509	190.085	458.933	2.41436	1.27164	0.00220645	0.0317455	scaf9	2976092	2984767	+	1068	-	GO:0003824;GO:0003824;GO:0030170;GO:0030170;	-	-	-	-	-	-
BGIBMGA011371	354.747	230.443	479.051	2.07883	1.05577	0.00220677	0.0317455	scaf12	3609204	3611272	+	384	-	-	-	-	-	-	-	-
BGIBMGA011025	1736.07	1100.32	2371.83	2.15558	1.10807	0.00221865	0.0318467	scaf31	3012999	3016598	-	3600	-	GO:0005515;GO:0007165;GO:0007165;GO:0016020;GO:0016021;GO:0016021;	-	-	-	-	-	-
BGIBMGA012885	9.5158	1.42854	17.6031	12.3224	3.62321	0.00223106	0.031955	scaf4	1739846	1745594	-	657	-	-	-	-	-	-	-	-
BGIBMGA003662	14.2643	3.92119	24.6073	6.27548	2.64973	0.00227717	0.0325799	scaf9	3211715	3215452	+	1479	-	GO:0005515;	-	-	-	-	-	101745626
BGIBMGA009281	22.2582	8.83199	35.6844	4.04036	2.01448	0.00239058	0.033834	scaf38	2079763	2080110	+	348	-	-	-	-	-	-	-	-
BGIBMGA006319	49.166	27.999	70.3331	2.51199	1.32883	0.00255921	0.0358727	scaf49	1594424	1599642	+	675	-	-	-	-	-	-	-	-
BGIBMGA001690	95.9777	51.3771	140.578	2.7362	1.45217	0.00259589	0.0361936	scaf35	652182	656505	-	1407	-	GO:0003676;GO:0003676;GO:0005634;GO:0005634;GO:0008270;GO:0008270;	-	-	-	-	-	101742376
BGIBMGA004029	610.679	395.373	825.985	2.08913	1.0629	0.00260445	0.0362745	scaf36	1185687	1195164	-	807	-	GO:0046872;GO:0046872;GO:0046872;	-	-	-	-	-	-
BGIBMGA013959	46.3453	25.908	66.7826	2.57768	1.36607	0.00267724	0.0369746	scaf29	626204	628839	+	762	-	GO:0046983;GO:0046983;	K09068	-	-	-	-	101743147
BGIBMGA008079	44.7677	24.7322	64.8033	2.6202	1.38968	0.00288318	0.0392818	scaf41	2077539	2077763	+	225	-	GO:0016020;GO:0016021;GO:0016021;GO:0016021;GO:0022857;GO:0022857;GO:0055085;GO:0055085;	-	-	-	-	-	-
BGIBMGA002807	67.0681	42.1888	91.9474	2.17943	1.12395	0.00289576	0.0393716	scaf30	1840259	1840804	-	546	-	GO:0004725;GO:0004725;GO:0006470;GO:0006470;GO:0008138;GO:0008138;GO:0016311;GO:0016311;GO:0016787;GO:0016791;GO:0016791;GO:0035335;	-	-	-	-	-	-
BGIBMGA013192	9.78672	0.513429	19.06	37.1229	5.21424	0.00301774	0.0405681	scaf39	1037619	1038365	-	747	-	-	-	-	-	-	-	101741281
BGIBMGA013237	1198.91	34.2185	2363.6	69.0738	6.11007	0.0031356	0.0418526	scaf39	1611522	1613971	+	1572	-	GO:0004497;GO:0004497;GO:0005506;GO:0005506;GO:0016020;GO:0016021;GO:0016021;GO:0016491;GO:0016705;GO:0016705;GO:0020037;GO:0020037;GO:0046872;GO:0055114;GO:0055114;GO:0055114;	-	-	-	-	-	-
BGIBMGA004034	27.4237	11.1756	43.6717	3.90776	1.96634	0.00315	0.0420022	scaf36	820725	841519	-	849	-	GO:0004930;GO:0004930;GO:0007186;GO:0007186;GO:0008528;GO:0008528;GO:0016020;GO:0016021;GO:0016021;GO:0016021;	-	-	-	-	-	-
BGIBMGA009882	13.7179	3.84669	23.5891	6.13232	2.61643	0.00331884	0.0438265	scaf51	700581	717077	+	699	-	-	-	-	-	-	-	-
BGIBMGA003387	53.6895	32.0692	75.3097	2.34835	1.23165	0.00335844	0.0442869	scaf42	456715	467611	+	1152	-	GO:0016020;GO:0016021;GO:0016021;GO:0022857;	-	-	-	-	-	-
BGIBMGA001890	5.2796	0	10.5592	Inf	Inf	0.00336939	0.0443867	scaf28	1748861	1752190	-	1062	-	GO:0004181;GO:0004181;GO:0006508;GO:0006508;GO:0008270;GO:0008270;	-	-	-	-	-	-
BGIBMGA005942	456.392	252.616	660.167	2.61332	1.38588	0.00337478	0.0444131	scaf5	7933821	7934963	-	1143	-	-	-	-	-	-	-	101738895
BGIBMGA013755	5.2686	0	10.5372	Inf	Inf	0.00338933	0.0444748	scaf47	1044767	1067889	-	924	-	-	-	-	-	-	-	-
BGIBMGA000462	540.58	242.414	838.747	3.45998	1.79076	0.00345143	0.0448823	scaf18	4855528	4864623	+	684	-	GO:0005576;GO:0005576;	-	-	-	-	27 kDa glycoprotein [Source:UniProtKB/Swiss-Prot;Acc:Q8T113]	692422
BGIBMGA008782	60.5732	37.2699	83.8765	2.25052	1.17026	0.00346482	0.0449674	scaf115	365379	371311	+	1788	-	GO:0003676;GO:0003676;GO:0005634;GO:0005634;GO:0008270;GO:0008270;	-	-	-	-	-	-
BGIBMGA008160	17.762	6.41384	29.1101	4.53864	2.18226	0.0035232	0.0456348	scaf52	233387	234142	-	756	-	GO:0016020;GO:0016021;GO:0016021;GO:0016021;	K06537	-	-	-	-	101736223
BGIBMGA001459	20.8515	8.54205	33.1609	3.88208	1.95683	0.00365144	0.0466518	scaf7	1650564	1650719	-	156	-	-	-	-	-	-	-	-
BGIBMGA011834	490.149	290.942	689.356	2.36939	1.24452	0.00365728	0.046681	scaf16	3063466	3068706	+	678	-	GO:0008113;GO:0008113;GO:0055114;GO:0055114;	-	-	-	-	-	-
BGIBMGA003199	720.952	416.766	1025.14	2.45974	1.29851	0.0037173	0.0472633	scaf13	5817263	5833807	+	2736	-	GO:0003824;GO:0003824;GO:0006520;GO:0006520;GO:0016491;GO:0016491;GO:0016831;GO:0016831;GO:0019752;GO:0019752;GO:0030170;GO:0030170;GO:0055114;GO:0055114;	-	-	-	-	-	-
BGIBMGA003079	356.068	230.456	481.68	2.09012	1.06358	0.00393471	0.0493116	scaf13	116074	116814	+	741	-	GO:0003677;GO:0003677;GO:0005634;GO:0005634;	K09267	-	-	-	-	101737080
BGIBMGA012864	6.53692	0.513429	12.5604	24.4638	4.61258	0.00422798	0.0522392	scaf4	3067565	3070773	-	273	-	GO:0008745;GO:0008745;GO:0009253;GO:0009253;	-	-	-	-	-	-
BGIBMGA005028	9.76152	1.94197	17.5811	9.05321	3.17843	0.00437133	0.0535437	scaf32	3510119	3511534	-	282	-	GO:0016020;GO:0016021;GO:0016021;	-	-	-	-	-	-
BGIBMGA006717	8.75654	1.42854	16.0845	11.2594	3.49306	0.00437258	0.0535437	scaf10	3435605	3445591	+	1203	-	GO:0007155;GO:0007155;GO:0007155;GO:0007229;GO:0007229;GO:0008305;GO:0008305;GO:0016020;	-	-	-	-	-	-
BGIBMGA002446	55.5009	34.0856	76.9162	2.25656	1.17412	0.00448683	0.0546661	scaf14	464699	467882	-	699	-	GO:0003924;GO:0003924;GO:0005525;GO:0005525;GO:0007165;GO:0007165;GO:0016020;GO:0016020;	-	-	-	-	-	-
BGIBMGA008938	5.02285	0	10.0457	Inf	Inf	0.00450368	0.0548205	scaf17	167428	171291	+	843	-	GO:0004252;GO:0004252;GO:0006508;GO:0006508;	-	-	-	-	-	-
BGIBMGA008428	21.4067	8.10312	34.7102	4.28356	2.09881	0.00492118	0.0587506	scaf2	1119196	1120764	+	1569	-	-	-	-	-	-	-	-
BGIBMGA006512	21.2039	5.27523	37.1326	7.03904	2.81538	0.00492496	0.0587506	scaf11	5118821	5119381	+	339	-	-	-	-	-	-	-	101745920
BGIBMGA009700	14.0535	4.50912	23.5979	5.23338	2.38774	0.00497214	0.0591573	scaf27	537357	539126	-	225	-	GO:0004129;GO:0004129;GO:0016020;GO:0016021;GO:0016021;GO:0022900;GO:1902600;	K02272	-	-	-	-	101743428
BGIBMGA002945	557.905	365.118	750.693	2.05603	1.03986	0.00497257	0.0591573	scaf30	4445855	4451906	+	825	-	GO:0004022;GO:0004022;GO:0055114;GO:0055114;	-	-	-	-	-	-
BGIBMGA006554	82.1131	43.7129	120.513	2.75692	1.46306	0.005011	0.0595068	scaf10	6661445	6663828	-	273	-	GO:0016020;GO:0016021;GO:0016021;	-	-	-	-	-	-
BGIBMGA011825	7.5375	1.02686	14.0481	13.6807	3.77407	0.00509829	0.0604887	scaf16	2730700	2731917	+	1218	-	GO:0005515;	-	-	-	-	-	101747005
BGIBMGA004702	72.4359	47.3814	97.4903	2.05756	1.04094	0.0051311	0.0608229	scaf108	183133	191300	+	1179	-	GO:0004128;GO:0004128;GO:0016491;GO:0016491;GO:0016491;GO:0055114;GO:0055114;GO:0055114;	-	-	-	-	-	-
BGIBMGA011984	14.8237	5.02254	24.6249	4.90288	2.29363	0.00518828	0.0611695	scaf59	1466324	1480211	+	1389	-	GO:0003824;GO:0003824;GO:0009058;GO:0009058;GO:0030170;GO:0030170;	-	-	-	-	-	-
BGIBMGA002041	28.165	14.1153	42.2148	2.99072	1.58049	0.00524492	0.0615061	scaf23	1267269	1268326	-	486	-	-	-	-	-	-	-	-
BGIBMGA006559	63.3037	40.6857	85.9217	2.11184	1.0785	0.00526662	0.0617055	scaf10	6463760	6475532	-	1542	-	GO:0006629;GO:0006629;GO:0016787;GO:0016787;	-	-	-	-	-	-
BGIBMGA003976	86.2441	54.503	117.985	2.16475	1.1142	0.00562612	0.0644233	scaf36	3756285	3765807	-	1437	-	GO:0004672;GO:0004672;GO:0004713;GO:0004713;GO:0005524;GO:0005524;GO:0006468;GO:0006468;GO:0018108;	-	-	-	-	-	-
BGIBMGA006336	20.0155	8.39306	31.638	3.76955	1.91439	0.00572618	0.0650028	scaf49	2305085	2306198	+	756	-	-	-	-	-	-	-	-
BGIBMGA011653	4.7705	0	9.54099	Inf	Inf	0.00600707	0.0676726	scaf16	2735217	2735654	-	438	-	-	-	-	-	-	-	101747140
BGIBMGA001071	4.7683	0	9.5366	Inf	Inf	0.00601417	0.0676726	scaf1	467029	469259	-	1260	-	-	-	-	-	-	-	-
BGIBMGA004473	4.7661	0	9.5322	Inf	Inf	0.00602127	0.0676726	scaf37	2244108	2244989	+	882	-	GO:0005576;GO:0005576;	-	-	-	-	-	101737238
BGIBMGA000111	10.2816	2.4554	18.1078	7.37467	2.88258	0.00623619	0.0695538	scaf43	260691	263667	-	918	-	-	-	-	-	-	-	-
BGIBMGA011108	30.5494	7.91687	53.182	6.71754	2.74793	0.00629046	0.0700754	scaf95	1157313	1162906	-	750	-	-	-	-	-	-	-	-
BGIBMGA009589	68.3885	41.8455	94.9316	2.26862	1.18182	0.00632757	0.0703099	scaf103	456587	458530	-	1944	-	GO:0003677;GO:0003677;	-	-	-	-	-	-
BGIBMGA000068	5.53854	0	11.0771	Inf	Inf	0.00638239	0.0706219	scaf43	2731580	2735730	-	1743	-	GO:0016614;GO:0016614;GO:0050660;GO:0050660;GO:0055114;GO:0055114;	-	-	-	-	-	-
BGIBMGA004457	7.30274	1.02686	13.5786	13.2235	3.72503	0.00641326	0.0707235	scaf37	1619314	1621349	+	675	-	GO:0005576;GO:0005576;	-	-	-	-	-	-
BGIBMGA001419	9.022	0.989609	17.0544	17.2334	4.10714	0.00647425	0.0712765	scaf7	5214603	5217863	-	1089	-	GO:0004497;GO:0004497;GO:0005506;GO:0005506;GO:0016491;GO:0016705;GO:0016705;GO:0020037;GO:0020037;GO:0046872;GO:0055114;GO:0055114;GO:0055114;	-	-	-	-	-	-
BGIBMGA007097	30.2981	15.871	44.7251	2.81804	1.49469	0.00672243	0.0732717	scaf21	3410493	3433041	+	3210	-	GO:0004222;GO:0004222;GO:0006508;GO:0006508;GO:0008237;GO:0008237;	-	-	-	-	-	-
BGIBMGA014000	39.409	22.5375	56.2805	2.49719	1.32031	0.00695042	0.0750714	scaf29	3337237	3359217	+	2361	-	GO:0005515;GO:0016020;GO:0016021;GO:0016021;	-	-	-	-	-	101737175
BGIBMGA000873	37.5744	21.3697	53.779	2.5166	1.33147	0.00697432	0.0752236	scaf1	12661126	12662843	-	252	-	-	-	-	-	-	-	-
BGIBMGA008215	65.7322	38.0733	93.3911	2.45293	1.29451	0.00697597	0.0752236	scaf121	586826	587935	-	1110	-	GO:0016491;GO:0016491;GO:0055114;GO:0055114;	-	-	-	-	-	101744754
BGIBMGA009406	6.03442	0.513429	11.5554	22.5063	4.49226	0.00705116	0.0758476	scaf81	347921	348634	-	714	-	GO:0046872;GO:0046872;	-	-	-	-	-	-
BGIBMGA010111	179.504	115.827	243.181	2.09953	1.07007	0.00708116	0.0760458	scaf15	4917962	4922381	-	2202	-	-	-	-	-	-	-	-
BGIBMGA012086	13.5138	4.43462	22.5929	5.09467	2.34899	0.00708726	0.0760491	scaf24	752583	781202	+	1908	-	GO:0000166;GO:0000166;GO:0005622;GO:0005622;GO:0009190;GO:0009190;GO:0016020;GO:0016021;GO:0016021;GO:0016829;GO:0016849;GO:0016849;GO:0035556;GO:0035556;	-	-	-	-	-	-
BGIBMGA013902	48.0658	23.3409	72.7906	3.11859	1.64089	0.00745661	0.0785365	scaf29	2803916	2805855	-	552	-	GO:0003999;GO:0003999;GO:0005737;GO:0005737;GO:0006168;GO:0006168;GO:0009116;GO:0009116;	K00759	EC:2.4.2.7	-	-	-	101736026
BGIBMGA004147	15.0596	5.49873	24.6205	4.4775	2.16269	0.00747265	0.0786424	scaf60	2299208	2304932	-	1650	-	GO:0008152;GO:0016787;GO:0016787;GO:0016787;	-	-	-	-	-	-
BGIBMGA007680	37.9793	21.6969	54.2617	2.5009	1.32245	0.0074815	0.0786725	scaf3	5611359	5621357	-	3741	-	-	-	-	-	-	-	-
BGIBMGA007670	10.0665	2.5299	17.6031	6.95801	2.79867	0.00753616	0.0790575	scaf3	6374036	6376376	-	1680	-	GO:0016020;GO:0016021;GO:0016021;	-	-	-	-	-	-
BGIBMGA008038	206.414	131.179	281.648	2.14705	1.10235	0.00754454	0.0790822	scaf41	12918	15706	+	657	PGRP-S1	GO:0002376;GO:0008270;GO:0008270;GO:0008745;GO:0008745;GO:0009253;GO:0009253;GO:0042834;GO:0042834;GO:0045087;GO:0045087;GO:0045087;	-	-	-	-	Peptidoglycan recognition protein[Source:UniProtKB/Swiss-Prot;Acc:Q9XTN0]	-
BGIBMGA007498	35.9233	20.0821	51.7646	2.57764	1.36605	0.00760791	0.0794089	scaf66	1530222	1532041	-	507	-	-	-	-	-	-	-	-
BGIBMGA008227	33.9233	18.5791	49.2674	2.65177	1.40696	0.00766774	0.0797921	scaf121	10588	13484	+	429	-	GO:0007155;GO:0007155;GO:0016020;GO:0016021;GO:0016021;GO:0016021;GO:0042246;GO:0042246;	-	-	-	-	-	-
BGIBMGA005444	301.75	145.738	457.761	3.14098	1.65121	0.00800385	0.0816169	scaf19	1630820	1632747	+	1233	-	GO:0016491;GO:0016627;GO:0016627;GO:0050660;GO:0050660;GO:0050660;GO:0055114;GO:0055114;GO:0055114;	-	-	-	-	-	-
BGIBMGA008101	8.04553	1.50304	14.588	9.70569	3.27883	0.00835622	0.0844885	scaf87	525883	532293	-	759	-	GO:0004252;GO:0004252;GO:0006508;GO:0006508;	-	-	-	-	-	-
BGIBMGA005230	59.3299	38.7065	79.9532	2.06563	1.04658	0.00849089	0.0854555	scaf110	249160	256189	+	939	-	GO:0005623;GO:0005623;GO:0045454;GO:0045454;	-	-	-	-	-	-
BGIBMGA003406	6.27914	0.47618	12.0821	25.3729	4.66522	0.00855232	0.0859419	scaf42	1288232	1291642	+	621	-	-	-	-	-	-	-	-
BGIBMGA014580	56.6562	36.4666	76.8458	2.1073	1.07539	0.00856832	0.0860287	scaf576	13570	13881	-	312	H4-L	GO:0000786;GO:0000786;GO:0000786;GO:0003677;GO:0003677;GO:0003677;GO:0005634;GO:0005634;GO:0005634;GO:0005694;GO:0006334;GO:0006334;GO:0006352;GO:0006352;GO:0046982;GO:0046982;	K11254	-	-	-	Histone H4 [Source:UniProtKB/TrEMBL;Acc:B9X1S5]"	100301501
BGIBMGA003444	20.0583	8.94373	31.1729	3.48544	1.80134	0.00862124	0.0862387	scaf9	8072944	8073949	-	333	-	-	-	-	-	-	-	-
BGIBMGA011637	40.1584	23.5271	56.7896	2.41379	1.2713	0.00863971	0.0862931	scaf16	3475178	3475745	-	288	-	-	-	-	-	-	-	-
BGIBMGA013236	1222.32	24.8359	2419.8	97.4317	6.60632	0.00876615	0.0872893	scaf39	1600636	1603780	+	1383	-	GO:0004497;GO:0004497;GO:0005506;GO:0005506;GO:0016020;GO:0016021;GO:0016021;GO:0016491;GO:0016705;GO:0016705;GO:0020037;GO:0020037;GO:0046872;GO:0055114;GO:0055114;GO:0055114;	-	-	-	-	-	-
BGIBMGA006892	458.686	232.47	684.902	2.9462	1.55886	0.00885464	0.0878375	scaf44	3181417	3197080	-	963	-	GO:0016020;GO:0016020;GO:0016757;GO:0016757;	-	-	-	-	-	-
BGIBMGA008972	5.76564	0.47618	11.0551	23.2162	4.53706	0.00916368	0.0900437	scaf17	2110151	2110363	+	213	-	-	-	-	-	-	-	-
BGIBMGA010977	9.81516	2.56715	17.0632	6.64675	2.73265	0.00918347	0.0901462	scaf83	437782	438360	-	579	-	-	-	-	-	-	-	101739955
BGIBMGA013945	9.72863	2.3809	17.0764	7.17223	2.84242	0.00939029	0.0913166	scaf29	9944	11074	+	1131	A1	GO:0000166;GO:0005524;GO:0005524;	-	-	-	-	Actin, muscle-type A1 [Source:UniProtKB/Swiss-Prot;Acc:P07836]	-
BGIBMGA012073	12.2542	3.92119	20.5873	5.25027	2.39239	0.00962253	0.0927287	scaf24	340207	340440	-	234	-	-	-	-	-	-	-	-
BGIBMGA001677	239.785	148.625	330.946	2.22672	1.15492	0.00973703	0.0933003	scaf35	1390600	1391883	-	1284	-	GO:0005515;	-	-	-	-	-	-
BGIBMGA001838	12.9718	4.36012	21.5835	4.95021	2.30749	0.0100543	0.0956216	scaf28	4597104	4601511	-	1086	-	GO:0003677;GO:0003677;GO:0005634;GO:0005634;GO:0006351;GO:0006351;GO:0006355;GO:0006355;	-	-	-	-	-	-
BGIBMGA002819	10.5503	3.00608	18.0946	6.01933	2.5896	0.0101238	0.0960739	scaf30	1509048	1527187	-	2688	-	GO:0005515;	-	-	-	-	-	-
BGIBMGA004300	28.566	5.78866	51.3434	8.86965	3.14888	0.0101696	0.096351	scaf79	575594	578580	-	543	-	-	-	-	-	-	-	-
BGIBMGA011489	14.5527	5.49873	23.6067	4.29313	2.10203	0.0103336	0.0974311	scaf22	810406	816340	-	1455	-	GO:0016020;GO:0016021;GO:0016021;GO:0016021;GO:0055085;GO:0055085;	-	-	-	-	-	-
BGIBMGA000270	6.75419	0.95236	12.556	13.1841	3.72073	0.0104099	0.0980805	scaf18	3237438	3239613	-	852	BMORCPR94	GO:0042302;GO:0042302;GO:0042302;	-	-	-	-	Putative cuticle protein[Source:UniProtKB/TrEMBL;Acc:C0H6T6]	100379381
BGIBMGA001204	17.4987	7.3662	27.6312	3.75108	1.9073	0.0104192	0.0980971	scaf1	9062203	9066151	+	705	-	GO:0046872;GO:0046872;	-	-	-	-	-	-
BGIBMGA002584	7.77236	1.46579	14.0789	9.60501	3.26379	0.0104652	0.0982485	scaf20	4351949	4352275	-	327	-	-	-	-	-	-	-	-
BGIBMGA004519	4.27898	0	8.55797	Inf	Inf	0.0106189	0.0986337	scaf97	142616	143539	-	924	-	GO:0008146;GO:0008146;	-	-	-	-	-	101745521
BGIBMGA010053	21.9982	3.37051	40.6259	12.0533	3.59136	0.0106421	0.0987794	scaf45	320162	321066	+	360	-	GO:0016020;GO:0016021;GO:0016021;	-	-	-	-	-	105842975
BGIBMGA005031	4.26579	0	8.53159	Inf	Inf	0.0106942	0.0991229	scaf32	3288044	3295600	-	468	-	-	-	-	-	-	-	-
BGIBMGA005958	24.5545	12.3887	36.7202	2.964	1.56754	0.0107162	0.099257	scaf5	7059983	7068731	-	846	-	-	-	-	-	-	-	101735520
BGIBMGA012923	27.7362	14.8069	40.6655	2.74639	1.45754	0.0115014	0.103893	scaf4	373656	379075	+	894	-	GO:0004252;GO:0004252;GO:0006508;GO:0006508;	-	-	-	-	-	-
BGIBMGA009012	471.786	305.467	638.105	2.08895	1.06278	0.0115439	0.104068	scaf17	4058313	4059663	+	327	-	GO:0005739;GO:0005739;GO:0009055;GO:0009055;GO:0020037;GO:0020037;GO:0022900;GO:0046872;GO:0046872;GO:0055114;GO:0070469;GO:0070469;	-	-	-	-	-	-
BGIBMGA008404	9.55747	0.989609	18.1253	18.3157	4.19501	0.0115447	0.104068	scaf2	537025	543446	-	516	-	-	-	-	-	-	-	-
BGIBMGA001104	91.8083	60.9088	122.708	2.01462	1.01051	0.0116421	0.104588	scaf1	1732572	1732742	+	171	-	-	-	-	-	-	-	-
BGIBMGA008649	9.27325	0	18.5465	Inf	Inf	0.0123455	0.109484	scaf132	8944	13214	-	1335	-	-	-	-	-	-	-	-
BGIBMGA001621	175.51	114.518	236.502	2.06519	1.04628	0.0125948	0.110946	scaf35	3545812	3565702	-	1992	-	GO:0003676;GO:0003676;	-	-	-	-	-	-
BGIBMGA010470	6.51063	0.95236	12.0689	12.6726	3.66364	0.0130918	0.114285	scaf6	863737	866106	-	702	-	-	-	-	-	-	-	-
BGIBMGA001246	27.7866	13.4156	42.1576	3.14243	1.65188	0.0132285	0.115214	scaf1	11095909	11102176	+	741	-	GO:0004867;GO:0004867;GO:0010951;	-	-	-	-	-	-
BGIBMGA009377	62.4515	39.3981	85.5049	2.17028	1.11788	0.0133256	0.115753	scaf53	1971619	1972716	+	1098	-	-	-	-	-	-	-	-
BGIBMGA003248	8.02029	0	16.0406	Inf	Inf	0.0141202	0.121133	scaf73	84634	87024	-	495	-	GO:0005213;GO:0005213;GO:0007275;GO:0007275;GO:0007304;GO:0007304;GO:0042600;GO:0042600;	-	-	-	-	-	101736313
BGIBMGA004387	12.4409	4.28562	20.5961	4.80586	2.26479	0.0141563	0.121288	scaf37	2252589	2253500	-	912	-	GO:0005576;GO:0005576;	-	-	-	-	-	-
BGIBMGA013510	840.441	464.62	1216.26	2.61776	1.38833	0.0141686	0.121311	scaf101	165625	174329	+	1128	BMRNRS	GO:0009263;GO:0009263;GO:0016491;GO:0016491;GO:0055114;GO:0055114;	K10808	EC:1.17.4.1	-	-	Ribonucleoside diphosphate reductase small subunit[Source:UniProtKB/TrEMBL;Acc:H9JVE7]	100873153
BGIBMGA013002	14.7766	5.93766	23.6155	3.97725	1.99177	0.0142733	0.12189	scaf4	4468778	4471848	+	1851	-	GO:0016614;GO:0016614;GO:0050660;GO:0050660;GO:0055114;GO:0055114;	-	-	-	-	-	105842055
BGIBMGA012886	4.01344	0	8.02688	Inf	Inf	0.0142734	0.12189	scaf4	1720126	1722792	-	384	-	-	-	-	-	-	-	-
BGIBMGA010432	63.7769	38.5203	89.0335	2.31134	1.20873	0.0143616	0.122563	scaf6	2272851	2273618	-	768	-	GO:0008152;GO:0016740;GO:0016758;GO:0016758;	-	-	-	-	-	-
BGIBMGA004089	10.0851	3.08058	17.0896	5.54752	2.47184	0.0145896	0.124106	scaf36	1086989	1089023	+	1836	-	-	-	-	-	-	-	-
BGIBMGA013859	403.593	239.831	567.355	2.36565	1.24224	0.0147848	0.125523	scaf62	958364	961032	+	1185	-	GO:0008152;GO:0015020;GO:0015020;GO:0016020;GO:0016021;GO:0016021;GO:0016740;GO:0016757;GO:0016758;GO:0016758;	-	-	-	-	-	-
BGIBMGA002485	56.0727	37.2699	74.8754	2.009	1.00648	0.0149251	0.126143	scaf14	1893666	1894619	+	624	-	GO:0016020;GO:0016021;GO:0016021;	-	-	-	-	-	-
BGIBMGA010770	9.96452	2.85708	17.072	5.97532	2.57902	0.0149911	0.126538	scaf25	408945	418004	-	2097	-	GO:0016020;GO:0016020;GO:0016798;GO:0016798;	-	-	-	-	-	101744388
BGIBMGA005399	8.26384	1.97922	14.5485	7.3506	2.87786	0.0151015	0.127225	scaf19	238017	239359	-	540	-	-	-	-	-	-	-	-
BGIBMGA001728	23.8051	12.426	35.1841	2.83149	1.50156	0.0154545	0.129204	scaf35	413702	418076	+	2022	-	GO:0003824;GO:0003824;GO:0004559;GO:0004559;GO:0005975;GO:0005975;GO:0006013;GO:0006013;GO:0030246;GO:0030246;	-	-	-	-	-	-
BGIBMGA013795	96.3447	49.1533	143.536	2.92017	1.54605	0.0155364	0.129573	scaf47	2124008	2149923	+	4278	-	GO:0005515;GO:0016020;GO:0016021;GO:0016021;	-	-	-	-	-	-
BGIBMGA010039	16.7208	7.32895	26.1127	3.56295	1.83307	0.0161286	0.132977	scaf45	69310	73162	+	453	-	GO:0005549;GO:0005549;	-	-	-	-	-	-
BGIBMGA000709	33.5555	19.8667	47.2442	2.37806	1.24979	0.0161532	0.133033	scaf8	5736665	5741523	+	468	-	GO:0005509;GO:0005509;	-	-	-	-	-	-
BGIBMGA004615	12.262	4.39737	20.1266	4.57696	2.19439	0.0165041	0.135225	scaf128	555452	558946	-	1515	-	GO:0005215;GO:0005215;GO:0016020;GO:0016021;GO:0016021;GO:0016021;GO:0022857;GO:0022857;GO:0055085;GO:0055085;	-	-	-	-	-	-
BGIBMGA003014	13.7618	5.38698	22.1366	4.10928	2.03888	0.0167334	0.136263	scaf13	4022228	4023110	-	468	-	GO:0020037;GO:0020037;GO:0020037;GO:0046872;GO:0046872;	-	-	-	-	-	101746637
BGIBMGA005250	46.11	29.949	62.271	2.07923	1.05605	0.0167539	0.136336	scaf58	1197744	1198536	-	255	-	-	-	-	-	-	-	-
BGIBMGA007658	27.6538	15.5811	39.7264	2.54966	1.35031	0.0171549	0.138569	scaf3	7309611	7311201	-	285	-	-	-	-	-	-	-	-
BGIBMGA009604	23.4979	12.3515	34.6442	2.80486	1.48793	0.0175186	0.1406	scaf103	236635	253307	+	3363	-	GO:0004435;GO:0004435;GO:0005622;GO:0005622;GO:0006629;GO:0006629;GO:0006629;GO:0007165;GO:0007165;GO:0007165;GO:0008081;GO:0008081;GO:0016042;GO:0016042;GO:0016787;GO:0035556;GO:0035556;	-	-	-	-	-	-
BGIBMGA014285	88.317	54.9047	121.729	2.2171	1.14867	0.017608	0.1411	scaf821	1402	2514	-	192	CECA	GO:0002376;GO:0005576;GO:0005576;GO:0005576;GO:0019731;GO:0019731;GO:0042742;GO:0045087;GO:0045087;	K20696	-	-	-	Cecropin-A [Source:UniProtKB/Swiss-Prot;Acc:Q27239]	693029
BGIBMGA005622	20.7726	10.3723	31.1729	3.0054	1.58756	0.0178294	0.142377	scaf33	1260229	1261048	+	357	-	GO:0003723;GO:0003723;GO:0005739;GO:0005739;GO:0010738;GO:0010738;GO:0034237;GO:0034237;	-	-	-	-	-	-
BGIBMGA004887	22.765	11.8381	33.692	2.84607	1.50897	0.0181604	0.14447	scaf144	131767	156229	-	2157	-	GO:0016020;GO:0016021;GO:0016021;	-	-	-	-	-	-
BGIBMGA007088	10.4714	3.37051	17.5723	5.21354	2.38226	0.0187941	0.148164	scaf21	2479897	2481540	+	1644	-	GO:0016020;GO:0016021;GO:0016021;	-	-	-	-	-	-
BGIBMGA013821	11.3347	4.07018	18.5993	4.56964	2.19208	0.0189083	0.148835	scaf62	1815695	1825833	-	1758	-	GO:0005242;GO:0005242;GO:0005244;GO:0006811;GO:0006813;GO:0006813;GO:0006813;GO:0016020;GO:0016021;GO:0016021;GO:0016021;GO:0034220;GO:0034765;GO:0034765;GO:0071805;	K05330	-	-	-	-	101742050
BGIBMGA001869	37.1536	5.82591	68.4813	11.7546	3.55516	0.0189132	0.148835	scaf28	2752488	2764695	-	11394	-	GO:0003777;GO:0003777;GO:0005524;GO:0005524;GO:0007018;GO:0007018;GO:0016887;GO:0016887;GO:0030286;GO:0030286;	-	-	-	-	-	-
BGIBMGA005633	119.792	79.8443	159.739	2.00064	1.00046	0.0191299	0.150091	scaf33	1882559	1912317	+	3174	-	-	-	-	-	-	-	-
BGIBMGA002225	46.7651	30.2762	63.254	2.08923	1.06297	0.0192201	0.150439	scaf122	308790	311894	+	348	-	GO:0005739;GO:0005743;GO:0005743;GO:0005743;GO:0006850;GO:0006850;	K22138	-	-	-	-	101736572
BGIBMGA002883	5.03381	0.513429	9.55418	18.6086	4.2179	0.0193825	0.151256	scaf30	1463554	1475850	+	1878	-	GO:0004591;GO:0004591;GO:0006099;GO:0006099;GO:0016624;GO:0016624;GO:0030976;GO:0030976;GO:0055114;GO:0055114;	-	-	-	-	-	-
BGIBMGA005959	62.5294	39.2119	85.847	2.18931	1.13048	0.0193935	0.151256	scaf5	7054892	7057417	-	1206	-	-	-	-	-	-	-	-
BGIBMGA005193	16.3116	4.43462	28.1886	6.35649	2.66823	0.0197772	0.153247	scaf119	355667	365941	-	1116	-	GO:0016702;GO:0016702;GO:0046872;GO:0046872;GO:0055114;GO:0055114;	-	-	-	-	-	-
BGIBMGA008829	7.03832	1.50304	12.5736	8.36546	3.06444	0.0198481	0.153705	scaf113	451589	459716	+	660	-	-	-	-	-	-	-	-
BGIBMGA003755	8.80472	2.5299	15.0795	5.96053	2.57544	0.0199974	0.154589	scaf91	1455200	1464261	-	1083	-	GO:0007165;GO:0007165;	-	-	-	-	-	-
BGIBMGA012398	20.61	10.5958	30.6242	2.89023	1.53118	0.0200635	0.154917	scaf82	1664306	1668792	+	315	-	GO:0055114;GO:0055114;	-	-	-	-	-	-
BGIBMGA006553	41.7786	26.794	56.7632	2.11851	1.08305	0.0201653	0.15552	scaf10	6674546	6674785	-	240	-	GO:0016020;GO:0016021;GO:0016021;	-	-	-	-	-	-
BGIBMGA006775	24.4853	13.3039	35.6668	2.68094	1.42274	0.0204974	0.157434	scaf10	6241444	6241983	+	540	LEB1/2	-	-	-	-	-	Lebocin-3 [Source:UniProtKB/Swiss-Prot;Acc:P55796]	-
BGIBMGA000700	6.03115	0.989609	11.0727	11.1889	3.484	0.0205751	0.157846	scaf8	5155450	5156525	+	612	-	-	-	-	-	-	-	-
BGIBMGA010921	6.01576	0.989609	11.0419	11.1578	3.47999	0.0206837	0.158495	scaf68	1249280	1255093	-	1041	-	GO:0006629;GO:0006631;GO:0006633;GO:0006633;GO:0016020;GO:0016021;GO:0016021;GO:0016021;GO:0016740;GO:0102336;GO:0102336;GO:0102337;GO:0102337;GO:0102338;GO:0102338;GO:0102756;GO:0102756;	-	-	-	-	-	-
BGIBMGA006662	21.3913	10.0823	32.7002	3.24331	1.69747	0.0207708	0.158699	scaf10	1110690	1111540	-	600	BMORCPG14	-	-	-	-	-	Putative cuticle protein[Source:UniProtKB/TrEMBL;Acc:C0H6E1]	100379509
BGIBMGA002123	37.2529	23.2372	51.2687	2.20632	1.14164	0.021172	0.16055	scaf23	3182566	3199867	+	2988	-	GO:0016316;GO:0016316;GO:0036092;	-	-	-	-	-	-
BGIBMGA004342	16.2413	7.3662	25.1164	3.40969	1.76964	0.0213516	0.161518	scaf79	1343247	1346699	+	408	-	-	-	-	-	-	-	-
BGIBMGA014519	45.4034	30.0235	60.7833	2.02452	1.01758	0.0215567	0.162436	scaf424	17957	19389	-	420	-	-	-	-	-	-	-	-
BGIBMGA003790	14.7525	6.37659	23.1284	3.62708	1.85881	0.0222404	0.166158	scaf91	828686	829886	+	273	-	-	-	-	-	-	-	-
BGIBMGA006762	8.99136	2.3809	15.6018	6.55291	2.71214	0.0230671	0.170491	scaf10	5605328	5609746	+	621	-	-	-	-	-	-	-	-
BGIBMGA002960	16.7986	7.95412	25.6431	3.22388	1.6888	0.0237234	0.173681	scaf13	6077636	6088965	-	2406	-	GO:0016020;GO:0016021;GO:0016021;GO:0016758;GO:0016758;	-	-	-	-	-	-
BGIBMGA012606	11.7748	0	23.5496	Inf	Inf	0.0243784	0.177306	scaf100	530434	533506	+	981	-	-	-	-	-	-	-	101744936
BGIBMGA003792	3.51094	0	7.02188	Inf	Inf	0.0254105	0.182272	scaf91	877934	878716	+	735	-	-	-	-	-	-	-	-
BGIBMGA001449	14.4848	6.37659	22.5929	3.54311	1.82501	0.0257938	0.183677	scaf7	2713124	2713477	-	354	-	-	-	-	-	-	-	-
BGIBMGA012882	28.4648	16.7116	40.218	2.40659	1.26699	0.0260789	0.185447	scaf4	1845510	1849576	-	1755	-	GO:0005267;GO:0005267;GO:0006811;GO:0016020;GO:0016020;GO:0016020;GO:0016021;GO:0016021;GO:0071805;GO:0071805;	-	-	-	-	-	-
BGIBMGA005263	49.728	31.5849	67.8711	2.14884	1.10356	0.0265981	0.188425	scaf58	333743	334555	-	813	-	-	-	-	-	-	-	-
BGIBMGA005340	12.9992	5.42423	20.5741	3.793	1.92334	0.0266521	0.188706	scaf19	3510929	3512393	-	1143	-	GO:0008270;GO:0008270;	-	-	-	-	-	-
BGIBMGA013936	21.2718	11.3619	31.1817	2.74441	1.4565	0.0270996	0.190948	scaf29	376650	378176	-	1527	-	-	-	-	-	-	-	-
BGIBMGA006881	8.53592	1.02686	16.045	15.6253	3.96581	0.0278619	0.194545	scaf70	1588570	1596460	+	1785	-	GO:0000166;GO:0004672;GO:0004672;GO:0004674;GO:0004674;GO:0004674;GO:0004692;GO:0004692;GO:0005524;GO:0005524;GO:0005524;GO:0006468;GO:0006468;GO:0016301;GO:0016310;GO:0016740;	-	-	-	-	-	-
BGIBMGA008045	59.71	21.7714	97.6486	4.48518	2.16516	0.0280243	0.19516	scaf41	303132	313769	+	1323	-	GO:0016787;GO:0016787;	-	-	-	-	-	-
BGIBMGA014578	15.7278	7.3662	24.0894	3.27027	1.70941	0.0282515	0.196014	scaf576	18710	19552	-	843	-	GO:0000786;GO:0000786;GO:0003677;GO:0003677;GO:0003677;GO:0005634;GO:0005634;GO:0005634;GO:0005694;GO:0006334;GO:0006334;	K11275	-	-	-	-	101740214
BGIBMGA013003	15.0136	6.89002	23.1372	3.35808	1.74763	0.0289386	0.199412	scaf4	4510412	4514698	+	1869	-	GO:0016614;GO:0016614;GO:0050660;GO:0050660;GO:0055114;GO:0055114;	-	-	-	-	-	-
BGIBMGA007041	14.9884	6.85277	23.124	3.3744	1.75463	0.0290287	0.199823	scaf21	1024898	1048855	-	1902	-	GO:0008271;GO:0008271;GO:0008271;GO:0008272;GO:0008272;GO:0015116;GO:0015116;GO:0016020;GO:0016020;GO:0016020;GO:0016021;GO:0016021;GO:0016021;GO:0055085;GO:0055085;GO:1902358;	K14708	-	-	-	-	101738233
BGIBMGA010441	6.53362	1.50304	11.5642	7.69388	2.94371	0.0303205	0.205485	scaf6	2093427	2100530	-	639	-	-	-	-	-	-	-	-
BGIBMGA009670	6.78921	1.54029	12.0381	7.81551	2.96634	0.030655	0.20711	scaf27	2625970	2626752	-	783	-	GO:0016020;GO:0016020;GO:0016020;GO:0016021;GO:0016021;	K05463	-	-	-	-	101736464
BGIBMGA009556	10.5382	3.99569	17.0808	4.2748	2.09586	0.0315543	0.210801	scaf157	49498	52613	+	1020	-	GO:0006629;GO:0006629;GO:0006633;GO:0006633;GO:0016020;GO:0016021;GO:0016021;GO:0016491;GO:0016717;GO:0016717;GO:0055114;GO:0055114;GO:0055114;	K00507	EC:1.14.19.1	-	-	-	692458
BGIBMGA004299	5.27077	0.513429	10.0281	19.5316	4.28774	0.0320331	0.212746	scaf79	599351	601356	-	372	-	-	-	-	-	-	-	-
BGIBMGA006832	35.3561	22.463	48.2492	2.14794	1.10295	0.0322567	0.213108	scaf70	277405	278640	-	1236	-	GO:0003676;GO:0003676;GO:0003723;GO:0003723;	-	-	-	-	-	101737436
BGIBMGA004011	4.50169	0.47618	8.52719	17.9075	4.16249	0.0323443	0.213258	scaf36	2507628	2508416	-	789	-	-	-	-	-	-	-	101737936
BGIBMGA001798	5.52205	0.989609	10.0545	10.1601	3.34484	0.0324766	0.213594	scaf35	2718696	2746630	+	2718	-	GO:0016020;GO:0016021;GO:0016021;	-	-	-	-	-	-
BGIBMGA002715	59.5331	36.2431	82.8231	2.28521	1.19233	0.0325221	0.213787	scaf20	4898171	4899712	+	1410	-	-	-	-	-	-	-	101743952
BGIBMGA000317	5.50342	0.95236	10.0545	10.5574	3.40019	0.0326767	0.214481	scaf18	1098469	1100489	-	486	-	-	-	-	-	-	-	-
BGIBMGA012973	14.7809	6.96451	22.5973	3.24464	1.69806	0.0332255	0.216736	scaf4	3109861	3112904	+	2655	-	-	-	-	-	-	-	-
BGIBMGA011777	7.2446	1.94197	12.5472	6.46108	2.69178	0.0337086	0.218416	scaf16	980521	982328	+	1254	-	GO:0006629;GO:0006629;GO:0016042;GO:0016042;GO:0016787;GO:0016788;GO:0016788;	-	-	-	-	Lipase [Source:UniProtKB/TrEMBL;Acc:H9JQH1]"	-
BGIBMGA010442	3.26958	0	6.53916	Inf	Inf	0.033734	0.218473	scaf6	2074961	2078860	-	345	-	GO:0016020;GO:0016021;GO:0016021;	-	-	-	-	-	-
BGIBMGA002936	3.26298	0	6.52597	Inf	Inf	0.0338526	0.219025	scaf30	4166282	4167514	+	363	-	-	-	-	-	-	-	-
BGIBMGA004538	8.04003	2.49265	13.5874	5.45099	2.44652	0.0353154	0.225052	scaf97	1288940	1290491	+	1386	-	GO:0005215;GO:0005215;GO:0016020;GO:0016021;GO:0016021;GO:0016021;GO:0022857;GO:0022857;GO:0055085;GO:0055085;	-	-	-	-	-	-
BGIBMGA012092	8.5578	2.56715	14.5485	5.66717	2.50263	0.0354489	0.225628	scaf24	1838154	1871284	+	5133	-	GO:0005509;GO:0005509;GO:0016020;GO:0016021;GO:0016021;	-	-	-	-	-	-
BGIBMGA000465	8.01261	2.4554	13.5698	5.52653	2.46637	0.0355299	0.225871	scaf18	4961522	4965661	+	1920	-	-	-	-	-	-	-	-
BGIBMGA003872	7.98959	2.41815	13.561	5.60802	2.48749	0.0357114	0.226477	scaf72	149967	150182	-	216	-	-	-	-	-	-	-	-
BGIBMGA003352	28.8719	17.5522	40.1916	2.28983	1.19524	0.0358019	0.226723	scaf42	920172	920866	-	420	-	-	-	-	-	-	-	-
BGIBMGA007999	30.7622	11.3619	50.1625	4.41498	2.14241	0.0360357	0.227436	scaf41	2079121	2079474	-	354	-	-	-	-	-	-	-	-
BGIBMGA010717	3.25859	0	6.51717	Inf	Inf	0.0360777	0.227591	scaf25	3990078	3991110	-	882	OSI20	GO:0016020;GO:0016021;GO:0016021;	-	-	-	-	Osiris 20 [Source:UniProtKB/TrEMBL;Acc:B6DXA7]"	100190961
BGIBMGA009217	11.0615	4.54636	17.5767	3.86609	1.95088	0.0368517	0.230733	scaf38	2307342	2307814	-	387	-	-	-	-	-	-	-	-
BGIBMGA008822	8.3231	1.54029	15.1059	9.8072	3.29384	0.0369846	0.231028	scaf113	36837	41846	+	1050	-	-	-	-	-	-	-	-
BGIBMGA011227	6.2889	1.54029	11.0375	7.16588	2.84114	0.0372981	0.231947	scaf12	3955521	3961496	-	2904	-	-	-	-	-	-	-	-
BGIBMGA000524	6.26484	1.46579	11.0639	7.54808	2.91611	0.0375484	0.232746	scaf8	5296150	5302039	-	630	-	GO:0005515;GO:0007165;GO:0007165;	-	-	-	-	-	-
BGIBMGA004576	6.25825	1.46579	11.0507	7.53908	2.91439	0.0376175	0.233051	scaf48	350480	374286	+	4515	-	GO:0005515;	-	-	-	-	-	-
BGIBMGA002500	6.24402	1.42854	11.0595	7.74182	2.95267	0.0377671	0.233647	scaf14	2515169	2518153	+	1815	-	-	-	-	-	-	-	-
BGIBMGA013828	6.24289	0.95236	11.5334	12.1104	3.59817	0.0382918	0.235341	scaf62	1003572	1006575	-	903	-	-	-	-	-	-	-	-
BGIBMGA001085	38.1294	24.4503	51.8085	2.11893	1.08334	0.0385547	0.236596	scaf1	182125	197958	+	3075	-	GO:0005216;GO:0005216;GO:0005262;GO:0005262;GO:0005515;GO:0006811;GO:0006811;GO:0006811;GO:0016020;GO:0016020;GO:0016020;GO:0016021;GO:0016021;GO:0016021;GO:0055085;GO:0055085;GO:0070588;GO:0070588;	-	-	-	-	-	-
BGIBMGA008530	25.0514	14.9186	35.1841	2.3584	1.23781	0.0386271	0.236804	scaf2	8202617	8222449	+	2919	-	GO:0004252;GO:0004252;GO:0006508;GO:0006508;	-	-	-	-	-	-
BGIBMGA000554	55.6106	36.4293	74.7919	2.05307	1.03778	0.038638	0.236804	scaf8	3596005	3597648	-	1287	-	-	-	-	-	-	-	-
BGIBMGA010339	40.4863	26.645	54.3277	2.03895	1.02782	0.0386619	0.23684	scaf109	379378	391800	+	2061	-	GO:0005515;	-	-	-	-	-	-
BGIBMGA000417	26.2408	15.7965	36.685	2.32235	1.21559	0.0390541	0.238575	scaf18	2699234	2705473	+	2373	-	-	-	-	-	-	-	-
BGIBMGA000152	31.2196	19.7549	42.6843	2.16069	1.11149	0.0391377	0.238864	scaf43	2255961	2279633	+	3351	-	GO:0004672;GO:0004672;GO:0004713;GO:0004713;GO:0005515;GO:0005524;GO:0005524;GO:0005887;GO:0005887;GO:0006468;GO:0006468;GO:0016020;GO:0016020;GO:0016020;GO:0016021;GO:0018108;	-	-	-	-	-	-
BGIBMGA000727	28.613	17.5522	39.6737	2.26032	1.17653	0.0395344	0.240058	scaf8	6688125	6693403	+	1116	-	-	-	-	-	-	-	-
BGIBMGA000418	13.0397	5.97491	20.1046	3.36484	1.75054	0.0405334	0.243423	scaf18	2725637	2735090	+	933	-	-	-	-	-	-	-	-
BGIBMGA002617	25.5911	15.5066	35.6756	2.30068	1.20206	0.04076	0.244124	scaf20	1878717	1881061	-	2262	-	GO:0005515;GO:0016020;GO:0016021;GO:0016021;	-	-	-	-	-	-
BGIBMGA000746	30.5481	19.3905	41.7057	2.15083	1.10489	0.040954	0.245019	scaf8	7834347	7835660	+	1314	-	-	-	-	-	-	-	-
BGIBMGA004282	304.627	198.491	410.763	2.06943	1.04924	0.0411864	0.245883	scaf79	936301	938171	-	432	-	-	-	-	-	-	-	-
BGIBMGA011216	4.26252	0.47618	8.04887	16.903	4.07921	0.0412477	0.246025	scaf12	4447738	4457601	-	2268	-	GO:0005515;GO:0007165;GO:0007165;GO:0016020;GO:0016021;GO:0016021;	-	-	-	-	-	105842301
BGIBMGA004689	26.695	16.2354	37.1546	2.28849	1.19439	0.0412964	0.246204	scaf108	407237	422983	-	2751	-	GO:0005576;GO:0005576;GO:0006629;GO:0006629;GO:0052689;GO:0052689;	-	-	-	-	-	-
BGIBMGA010938	4.25373	0.47618	8.03128	16.8661	4.07605	0.0413912	0.246433	scaf68	43206	45641	+	1125	-	GO:0016020;GO:0016021;GO:0016021;GO:0016021;GO:0055085;GO:0055085;	-	-	-	-	-	-
BGIBMGA007240	33.6014	21.9949	45.2078	2.05538	1.0394	0.0421236	0.249212	scaf131	37190	55104	+	1722	-	GO:0004888;GO:0004888;GO:0005216;GO:0005216;GO:0005230;GO:0005230;GO:0005886;GO:0005886;GO:0006811;GO:0006811;GO:0006811;GO:0016020;GO:0016021;GO:0016021;GO:0016021;GO:0034220;GO:0034220;	-	-	-	-	-	-
BGIBMGA008645	7.77669	2.49265	13.0607	5.2397	2.38948	0.0426114	0.250965	scaf132	142492	143882	-	543	-	-	-	-	-	-	-	-
BGIBMGA000239	7.76026	2.4554	13.0651	5.32098	2.41169	0.042762	0.251458	scaf18	4532223	4545078	-	1290	-	GO:0004601;GO:0004601;GO:0006979;GO:0006979;GO:0020037;GO:0020037;GO:0042600;GO:0042600;GO:0055114;GO:0055114;GO:0098869;	-	-	-	-	-	-
BGIBMGA007093	8735.43	5789.97	11680.9	2.01744	1.01252	0.0431973	0.252606	scaf21	3069304	3083971	+	951	-	GO:0005739;GO:0005743;GO:0005743;GO:0005743;GO:0015187;GO:0015187;GO:0015187;GO:0016020;GO:0016021;GO:0016021;GO:0022857;GO:1904983;GO:1904983;GO:1904983;	K15118	-	-	-	-	101745781
BGIBMGA010003	11.7474	4.87355	18.6212	3.82088	1.93391	0.0435013	0.25424	scaf45	3211104	3211639	-	210	-	GO:0003839;GO:0003839;GO:0003839;GO:0006751;GO:0006751;GO:0006751;GO:0016829;	-	-	-	-	-	-
BGIBMGA013229	14.3311	7.03901	21.6231	3.07189	1.61913	0.0435618	0.254355	scaf39	1402613	1411450	+	1650	-	-	-	-	-	-	-	101738429
BGIBMGA012157	3.01942	0	6.03885	Inf	Inf	0.0450001	0.259224	scaf75	795090	795967	-	681	-	-	-	-	-	-	-	-
BGIBMGA006064	3.01723	0	6.03445	Inf	Inf	0.0450525	0.259299	scaf5	665136	665939	-	282	-	-	-	-	-	-	-	-
BGIBMGA010070	3.01503	0	6.03006	Inf	Inf	0.0451051	0.259344	scaf45	1296484	1308703	+	1413	-	GO:0003824;GO:0003824;GO:0008152;	-	-	-	-	-	-
BGIBMGA000004	3.01283	0	6.02566	Inf	Inf	0.0451578	0.259344	scaf98	1046524	1055009	-	936	-	GO:0004497;GO:0004497;GO:0005506;GO:0005506;GO:0016491;GO:0016705;GO:0016705;GO:0020037;GO:0020037;GO:0046872;GO:0055114;GO:0055114;GO:0055114;	-	-	-	-	-	-
BGIBMGA011376	22.651	13.1549	32.1471	2.44374	1.28909	0.0451592	0.259344	scaf12	3884440	3885240	+	354	-	GO:0016020;GO:0016021;GO:0016021;	-	-	-	-	-	-
BGIBMGA011750	3.00843	0	6.01687	Inf	Inf	0.0452634	0.259829	scaf16	125217	145668	+	2865	-	GO:0005515;	-	-	-	-	-	-
BGIBMGA002815	13.5226	6.41384	20.6313	3.21668	1.68557	0.0454	0.260325	scaf30	1616134	1616442	-	309	-	-	-	-	-	-	-	-
BGIBMGA013762	19.4966	10.8485	28.1447	2.59435	1.37537	0.0455769	0.260695	scaf47	474316	475546	-	837	-	GO:0004984;GO:0004984;GO:0005549;GO:0005549;GO:0007165;GO:0007608;GO:0007608;GO:0007608;GO:0016020;GO:0016020;GO:0016020;GO:0016021;GO:0016021;GO:0050896;GO:0050911;	-	-	-	-	-	-
BGIBMGA008153	6.03551	1.50304	10.568	7.03108	2.81375	0.0459071	0.261808	scaf52	589487	599205	-	1044	-	GO:0016020;GO:0016021;GO:0016021;	-	-	-	-	-	-
BGIBMGA001273	15.5423	7.99137	23.0932	2.88977	1.53095	0.0463179	0.263606	scaf1	12952569	12956594	+	699	-	GO:0016491;GO:0016491;GO:0055114;GO:0055114;	-	-	-	-	-	-
BGIBMGA014362	5.98068	1.42854	10.5328	7.37313	2.88228	0.047172	0.266277	scaf155	320873	321127	-	255	-	-	-	-	-	-	-	-
BGIBMGA004455	14.7941	7.47794	22.1102	2.95672	1.564	0.0482096	0.269785	scaf37	1594245	1595009	+	765	-	GO:0005576;GO:0005576;	-	-	-	-	-	-
BGIBMGA013298	14.6845	7.25445	22.1146	3.04842	1.60806	0.0487692	0.27222	scaf71	678943	726421	-	5442	-	GO:0005216;GO:0005216;GO:0005219;GO:0005219;GO:0005623;GO:0005623;GO:0006811;GO:0006811;GO:0006816;GO:0006816;GO:0006874;GO:0006874;GO:0016020;GO:0016020;GO:0016020;GO:0016021;GO:0016021;GO:0016021;GO:0034220;GO:0051209;GO:0055085;GO:0055085;	-	-	-	-	-	-
BGIBMGA004399	107.399	61.7041	153.095	2.48111	1.31099	0.0495522	0.274955	scaf37	1633889	1634659	-	771	LP-C12	GO:0005576;GO:0005576;	-	-	-	-	Low molecular 30 kDa lipoprotein PBMHP-12[Source:UniProtKB/Swiss-Prot;Acc:P09335]	-
BGIBMGA012637	11.2459	4.9108	17.5811	3.58008	1.83999	0.0498108	0.275343	scaf129	227613	233611	-	1038	-	GO:0016020;GO:0016021;GO:0016021;GO:0016747;GO:0016747;	-	-	-	-	-	-
BGIBMGA011859	5.27733	1.02686	9.5278	9.2786	3.21391	0.049982	0.275838	scaf16	4564322	4570141	+	1887	-	GO:0005515;	K10448	-	-	-	-	101742076
BGIBMGA004445	22.4983	13.3411	31.6556	2.37279	1.24658	0.0499844	0.275838	scaf37	1111761	1118603	+	909	-	GO:0004252;GO:0004252;GO:0006508;GO:0006508;	-	-	-	-	-	-
BGIBMGA003847	3837.48	6832.74	842.216	0.123262	-3.0202	1.62948e-70	2.37795e-67	scaf72	1880462	1883502	-	1089	-	-	-	-	-	-	-	-
BGIBMGA003848	1712.44	2770.66	654.217	0.236124	-2.08239	8.95934e-34	7.8448e-31	scaf72	1877441	1878370	-	930	-	-	-	-	-	-	-	-
BGIBMGA007038	577.883	976.646	179.12	0.183404	-2.44691	1.58225e-33	1.29883e-30	scaf21	1424809	1446318	-	1692	-	GO:0008271;GO:0008271;GO:0008272;GO:0008272;GO:0015116;GO:0015116;GO:0016020;GO:0016020;GO:0016020;GO:0016021;GO:0016021;GO:0016021;GO:0055085;GO:0055085;GO:1902358;	-	-	-	-	-	-
BGIBMGA010599	743.273	1210.4	276.145	0.228144	-2.13198	5.08689e-29	3.51638e-26	scaf234	9026	11038	+	2013	-	GO:0016020;GO:0016021;GO:0016021;	-	-	-	-	-	-
BGIBMGA014347	158.02	285.893	30.1459	0.105444	-3.24544	5.82307e-26	3.18668e-23	scaf2644	54	659	-	606	-	-	-	-	-	-	-	-
BGIBMGA010596	2198.44	3267.55	1129.32	0.345619	-1.53275	1.81906e-20	8.23848e-18	scaf145	208327	210768	+	2442	-	GO:0003677;GO:0003677;GO:0005634;GO:0005634;GO:0046872;GO:0046872;	K11446	EC:1.14.11.-	-	-	-	100533205
BGIBMGA011213	671.159	1030.89	311.425	0.302093	-1.72694	1.22033e-19	5.34262e-17	scaf12	4535703	4547239	-	1455	-	GO:0016020;GO:0016020;GO:0016020;GO:0016021;GO:0016021;	-	-	-	-	-	-
BGIBMGA007397	9373.75	15917.7	2829.82	0.177778	-2.49185	3.39253e-19	1.39242e-16	scaf55	780051	781377	+	645	-	GO:0005737;GO:0005737;GO:0009968;GO:0009968;	-	-	-	-	-	-
BGIBMGA002638	962.593	1434.06	491.129	0.342476	-1.54593	7.16405e-18	2.68836e-15	scaf20	402429	410607	-	876	-	GO:0006812;GO:0006812;GO:0015297;GO:0015299;GO:0015299;GO:0016021;GO:0016021;GO:0055085;GO:0055085;GO:1902600;	-	-	-	-	-	-
BGIBMGA004194	272.354	437.673	107.036	0.244556	-2.03176	1.08214e-17	3.73003e-15	scaf60	1110910	1129796	+	1623	-	GO:0004553;GO:0004553;GO:0004563;GO:0004563;GO:0004563;GO:0005975;GO:0005975;GO:0008152;GO:0016787;GO:0016798;GO:0102148;GO:0102148;	-	-	-	-	Beta-hexosaminidase[Source:UniProtKB/TrEMBL;Acc:H9J3V5]	-
BGIBMGA014351	89.7917	162.511	17.072	0.105051	-3.25084	2.05604e-17	6.75102e-15	scaf2895	35	406	+	372	-	-	-	-	-	-	-	-
BGIBMGA008774	1377.15	2014.34	739.95	0.36734	-1.44481	3.75005e-17	1.2013e-14	scaf115	55158	57755	-	2598	BMO.10612	GO:0005634;GO:0005634;	K06709	EC:1.14.11.-	-	-	KDM4 [Source:UniProtKB/TrEMBL;Acc:E9JTY1]"	100862759
BGIBMGA008538	201.538	333.142	69.9339	0.209922	-2.25207	1.93816e-16	5.91996e-14	scaf2	8825717	8840501	+	645	-	-	-	-	-	-	-	-
BGIBMGA000073	1591.79	2301.12	882.452	0.383487	-1.38275	2.61738e-16	7.81287e-14	scaf43	2389587	2396756	-	951	-	GO:0003677;GO:0003677;GO:0005634;GO:0005634;	-	-	-	-	-	-
BGIBMGA004545	1066.96	1642.51	491.401	0.299177	-1.74093	8.10805e-16	2.21857e-13	scaf48	2016597	2030390	-	3768	-	GO:0003676;GO:0003676;	-	-	-	-	-	-
BGIBMGA004813	221.517	377.169	65.8655	0.174631	-2.51762	1.99579e-15	5.34953e-13	scaf46	1272178	1274713	-	162	-	-	-	-	-	-	-	-
BGIBMGA008442	5347.88	7492.19	3203.56	0.427587	-1.22571	6.41765e-15	1.68579e-12	scaf2	1781078	1805623	+	3612	BMO.10827	GO:0000166;GO:0003824;GO:0003824;GO:0004736;GO:0004736;GO:0004736;GO:0005524;GO:0005524;GO:0005524;GO:0006090;GO:0006090;GO:0006094;GO:0006094;GO:0009374;GO:0009374;GO:0016874;GO:0046872;GO:0046872;GO:0046872;	-	-	-	-	Pyruvate carboxylase[Source:UniProtKB/TrEMBL;Acc:H9JFZ5]	-
BGIBMGA003099	134.771	225.296	44.2468	0.196394	-2.34818	1.35342e-14	3.41843e-12	scaf13	2122871	2163775	+	1626	-	GO:0004114;GO:0004114;GO:0007165;GO:0007165;GO:0008081;GO:0008081;GO:0016787;GO:0046872;GO:0046872;	-	-	-	-	-	-
BGIBMGA002483	2634.29	3708.26	1560.33	0.420771	-1.24889	1.454e-14	3.60317e-12	scaf14	1868570	1881772	+	4845	-	-	-	-	-	-	-	101744043
BGIBMGA011477	368.905	557.009	180.801	0.324592	-1.6233	5.06077e-14	1.18693e-11	scaf22	1335961	1350007	-	1362	-	GO:0000166;GO:0001678;GO:0001678;GO:0004396;GO:0004396;GO:0004396;GO:0005524;GO:0005524;GO:0005524;GO:0005536;GO:0005536;GO:0005623;GO:0005623;GO:0005975;GO:0005975;GO:0006096;GO:0006096;GO:0006096;GO:0016301;GO:0016310;GO:0016740;GO:0016773;GO:0016773;GO:0046835;	K00844	EC:2.7.1.1	-	-	-	101745054
BGIBMGA013148	1256.08	1783.02	729.133	0.408932	-1.29007	6.19477e-14	1.42741e-11	scaf124	505718	507272	+	1251	-	GO:0016740;GO:0017183;GO:0017183;GO:0017183;	-	-	-	-	Diphthamide biosynthesis protein 1[Source:UniProtKB/TrEMBL;Acc:H9JUD5]	-
BGIBMGA006189	692.386	1000.6	384.169	0.383937	-1.38106	1.54056e-13	3.37228e-11	scaf5	6605196	6615937	+	1635	-	GO:0003824;GO:0003824;GO:0008152;	-	-	-	-	-	-
BGIBMGA001150	176.314	280.259	72.3695	0.258224	-1.95331	4.98918e-13	1.04013e-10	scaf1	6317611	6328140	+	759	-	GO:0016020;GO:0016021;GO:0016021;	-	-	-	-	-	-
BGIBMGA013914	607.612	874.596	340.628	0.389469	-1.36042	1.16638e-12	2.39362e-10	scaf29	2114163	2117483	-	1107	-	-	-	-	-	-	-	-
BGIBMGA012585	181.471	296.598	66.3438	0.223683	-2.16047	1.31354e-12	2.65416e-10	scaf100	1016911	1022446	-	1188	-	GO:0008152;GO:0016787;GO:0016787;GO:0016787;	-	-	-	-	-	-
BGIBMGA014203	4694.05	6406.93	2981.17	0.465304	-1.10375	2.24036e-12	4.32719e-10	scaf464	18541	19533	-	993	-	-	-	-	-	-	-	101742613
BGIBMGA005120	951.417	1339.02	563.819	0.42107	-1.24787	2.51576e-12	4.7887e-10	scaf32	1497227	1516204	+	1371	-	GO:0046872;GO:0046872;	-	-	-	-	-	-
BGIBMGA010338	2102.18	2888.28	1316.08	0.455662	-1.13396	4.26431e-12	7.77157e-10	scaf109	339058	376457	+	2706	-	GO:0016491;GO:0016491;GO:0055114;GO:0055114;	-	-	-	-	-	-
BGIBMGA004178	2132.53	2919.87	1345.2	0.460707	-1.11808	8.80082e-12	1.48408e-09	scaf60	565557	573691	+	1155	-	GO:0006869;GO:0006869;	-	-	-	-	Oxysterol-binding protein[Source:UniProtKB/TrEMBL;Acc:H9J3T9]	-
BGIBMGA010919	642.509	911.145	373.872	0.410332	-1.28514	1.06651e-11	1.72933e-09	scaf68	1285147	1297491	-	861	-	GO:0006629;GO:0006631;GO:0006633;GO:0006633;GO:0016020;GO:0016021;GO:0016021;GO:0016021;GO:0016740;GO:0102336;GO:0102336;GO:0102337;GO:0102337;GO:0102338;GO:0102338;GO:0102756;GO:0102756;	-	-	-	-	-	-
BGIBMGA005036	1097.45	1524.12	670.776	0.440108	-1.18407	1.15333e-11	1.8473e-09	scaf32	3038758	3044862	-	657	-	GO:0008152;GO:0016787;GO:0016787;	-	-	-	-	-	-
BGIBMGA002199	235.907	374.367	97.4463	0.260296	-1.94177	1.22003e-11	1.93059e-09	BABH01044028	9827	10890	+	453	-	GO:0003824;GO:0003824;GO:0008152;	-	-	-	-	-	-
BGIBMGA007487	998.297	1442.6	553.993	0.384024	-1.38073	1.63353e-11	2.52409e-09	scaf102	942845	951322	+	900	-	GO:0016020;GO:0016021;GO:0016021;GO:0022857;GO:0022857;GO:0055085;GO:0055085;	-	-	-	-	-	-
BGIBMGA003999	795.061	1108.6	481.518	0.434346	-1.20308	3.75027e-11	5.66162e-09	scaf36	2975117	2986372	-	2028	-	GO:0003676;GO:0003676;	-	-	-	-	-	-
BGIBMGA006426	20903.9	28090.5	13717.3	0.488327	-1.03408	4.0619e-11	5.99427e-09	scaf11	895454	897614	-	1047	-	GO:0005515;	-	-	-	-	-	-
BGIBMGA003185	1652.84	2253.77	1051.92	0.466738	-1.09931	4.5142e-11	6.58773e-09	scaf13	5215534	5229600	+	3558	-	-	-	-	-	-	-	-
BGIBMGA006627	1110.64	1647.95	573.334	0.347907	-1.52323	5.90541e-11	8.52326e-09	scaf10	3017846	3025726	-	1443	-	-	-	-	-	-	-	-
BGIBMGA001288	64.5972	112.592	16.6024	0.147457	-2.76164	6.31291e-11	9.01237e-09	scaf1	14261057	14271026	+	912	-	GO:0016020;GO:0016021;GO:0016021;	-	-	-	-	-	-
BGIBMGA003846	111.361	179.923	42.7986	0.237872	-2.07174	1.23487e-10	1.7045e-08	scaf72	2001012	2004966	-	579	-	-	-	-	-	-	-	-
BGIBMGA009282	1850.85	2502.67	1199.04	0.479106	-1.06158	1.29191e-10	1.74928e-08	scaf38	2084495	2097031	+	918	-	GO:0005515;	-	-	-	-	-	-
BGIBMGA013649	2348.68	3157.85	1539.5	0.487515	-1.03648	1.88444e-10	2.45052e-08	scaf162	145538	158992	-	2703	-	GO:0072659;	-	-	-	-	-	-
BGIBMGA010297	2223.93	2982.55	1465.31	0.491295	-1.02534	3.15435e-10	4.02225e-08	scaf127	579101	580033	-	933	-	GO:0003677;GO:0003700;GO:0003700;GO:0005634;GO:0005634;GO:0006351;GO:0006355;GO:0006355;GO:0043565;GO:0043565;	-	-	-	-	-	-
BGIBMGA003864	1928.83	2590.78	1266.89	0.488999	-1.0321	3.36183e-10	4.20516e-08	scaf72	586474	590838	-	1107	-	GO:0016020;GO:0016021;GO:0016021;	-	-	-	-	-	-
BGIBMGA008592	1841.55	2480.9	1202.2	0.484582	-1.04519	6.87844e-10	8.0662e-08	scaf85	97269	100726	+	1503	-	GO:0005515;	-	-	-	-	-	101738737
BGIBMGA005500	1494.66	2002.86	986.454	0.492523	-1.02174	1.40366e-09	1.61717e-07	scaf19	4997351	5006791	+	1593	-	GO:0004553;GO:0004553;GO:0004566;GO:0004566;GO:0005764;GO:0005764;GO:0005975;GO:0005975;GO:0008152;GO:0016787;GO:0016798;	-	-	-	-	-	-
BGIBMGA013562	345.806	492.602	199.009	0.403996	-1.30759	1.45808e-09	1.66526e-07	scaf130	171712	176889	+	1014	-	-	-	-	-	-	-	-
BGIBMGA010471	1451.39	1996.7	906.072	0.453785	-1.13992	1.53199e-09	1.71976e-07	scaf6	731951	828001	-	40530	-	GO:0003779;GO:0005515;GO:0005635;GO:0005635;GO:0034993;GO:0034993;GO:0051015;GO:0051015;GO:0090286;GO:0090286;	-	-	-	-	-	-
BGIBMGA010240	285.461	455.244	115.677	0.254099	-1.97654	1.98214e-09	2.18768e-07	scaf15	3001155	3015837	+	1632	-	GO:0004553;GO:0004553;GO:0005576;GO:0005576;GO:0005975;GO:0005975;GO:0006030;GO:0006030;GO:0008061;GO:0008061;GO:0008152;GO:0016787;GO:0016798;	-	-	-	-	-	-
BGIBMGA006230	1802.69	2460.71	1144.67	0.465179	-1.10414	3.28202e-09	3.47629e-07	scaf5	8596627	8598044	+	1128	-	GO:0003676;GO:0003676;	K05706	-	-	-	-	101744234
BGIBMGA005266	1835.66	3043.14	628.18	0.206425	-2.27631	3.3158e-09	3.48398e-07	scaf58	56770	61320	-	819	-	GO:0005506;GO:0005506;GO:0016705;GO:0016705;GO:0020037;GO:0020037;GO:0055114;GO:0055114;	-	-	-	-	-	-
BGIBMGA009904	461.499	640.556	282.443	0.440934	-1.18137	3.6395e-09	3.71829e-07	scaf51	1642567	1663359	+	3117	-	-	-	-	-	-	-	-
BGIBMGA010597	136.254	209.127	63.3815	0.303077	-1.72224	3.89063e-09	3.90073e-07	scaf145	254873	260152	+	4224	-	GO:0005509;GO:0005509;GO:0005886;GO:0005886;GO:0007155;GO:0007155;GO:0007156;GO:0007156;GO:0016020;GO:0016020;GO:0016020;GO:0016021;GO:0016021;	-	-	-	-	-	-
BGIBMGA008490	806.207	1088.73	523.685	0.481005	-1.05588	5.07549e-09	5.05011e-07	scaf2	4795244	4800762	+	2295	-	GO:0005515;	-	-	-	-	-	-
BGIBMGA005612	1107.1	1478.18	736.022	0.497924	-1.006	6.17787e-09	5.92264e-07	scaf33	838415	849849	+	522	GB	GO:0005344;GO:0005344;GO:0015671;GO:0019825;GO:0019825;GO:0020037;GO:0020037;GO:0046872;GO:0046872;	K21894	-	-	-	Globin [Source:UniProtKB/TrEMBL;Acc:B6ZIV8]"	100216496
BGIBMGA008105	427.062	593.265	260.859	0.439701	-1.18541	6.51421e-09	6.15523e-07	scaf87	353983	359856	-	1932	-	GO:0005515;	-	-	-	-	-	-
BGIBMGA013669	802.619	1082.04	523.202	0.483534	-1.04831	7.58443e-09	7.06482e-07	scaf126	219839	226416	-	1440	-	GO:0005856;GO:0005856;	-	-	-	-	-	-
BGIBMGA013026	167.715	249.983	85.4478	0.341815	-1.54871	8.70261e-09	8.0493e-07	scaf4	5632479	5635018	+	1005	-	GO:0016020;GO:0016021;GO:0016021;	-	-	-	-	-	-
BGIBMGA013563	838.268	1243.78	432.755	0.347936	-1.52311	9.99845e-09	9.18319e-07	scaf130	187154	201497	+	1896	-	GO:0005515;	-	-	-	-	-	-
BGIBMGA009298	3969.27	5949.47	1989.07	0.334328	-1.58067	1.17651e-08	1.05118e-06	scaf38	3612292	3617247	+	1128	-	GO:0016301;GO:0016301;GO:0016301;GO:0016310;GO:0016740;GO:0032958;GO:0032958;	-	-	-	-	-	-
BGIBMGA002946	423.415	585.08	261.75	0.447375	-1.16044	1.34179e-08	1.16709e-06	scaf13	6669103	6695563	-	4188	-	GO:0003676;GO:0003676;	-	-	-	-	-	-
BGIBMGA009381	333.15	466.728	199.571	0.427596	-1.22568	1.48305e-08	1.2731e-06	scaf53	2497862	2500828	+	684	-	GO:0016020;GO:0016021;GO:0016021;	-	-	-	-	-	101744784
BGIBMGA010073	114.323	176.925	51.7206	0.292331	-1.77432	1.7289e-08	1.47451e-06	scaf45	1383931	1384780	+	294	-	-	-	-	-	-	-	-
BGIBMGA010874	641.299	866.815	415.784	0.479668	-1.05989	1.85018e-08	1.55771e-06	scaf61	42052	57907	-	4449	-	GO:0005509;GO:0005509;GO:0005886;GO:0005886;GO:0007155;GO:0007155;GO:0007156;GO:0007156;GO:0016020;GO:0016020;GO:0016020;GO:0016021;GO:0016021;	-	-	-	-	-	-
BGIBMGA012477	497.964	680.926	315.002	0.462609	-1.11214	1.94354e-08	1.62589e-06	scaf56	645851	647271	-	678	-	GO:0003677;GO:0003677;GO:0003677;GO:0005634;GO:0005634;GO:0006351;GO:0006351;GO:0006355;GO:0006355;	-	-	-	-	-	101741286
BGIBMGA005183	459.594	630.211	288.978	0.458541	-1.12488	2.42431e-08	2.00257e-06	scaf119	638777	642076	-	1440	-	-	-	-	-	-	-	-
BGIBMGA012795	1389.09	1863.82	914.362	0.490585	-1.02742	2.99103e-08	2.42495e-06	scaf4	7229541	7239308	-	2055	-	-	-	-	-	-	-	-
BGIBMGA010875	94.0061	147.816	40.196	0.271932	-1.87868	3.56534e-08	2.87283e-06	scaf61	28248	40894	-	1362	-	GO:0005509;GO:0005509;GO:0016020;GO:0016020;	-	-	-	-	-	-
BGIBMGA008915	636.55	978.18	294.92	0.301498	-1.72978	4.80063e-08	3.70891e-06	scaf17	1480331	1481056	-	726	-	GO:0003677;GO:0003677;GO:0005634;GO:0005634;GO:0006351;GO:0006351;GO:0006355;GO:0006355;GO:0006355;GO:0046983;GO:0046983;	-	-	-	-	-	-
BGIBMGA009488	64.0741	105.516	22.6325	0.214494	-2.22099	5.01849e-08	3.85455e-06	scaf40	621406	637293	+	1188	-	GO:0003993;GO:0003993;GO:0016311;	-	-	-	-	-	-
BGIBMGA001566	170.635	249.804	91.4646	0.366145	-1.44951	5.51474e-08	4.18674e-06	scaf7	5745769	5763125	+	5877	-	GO:0005622;GO:0005622;GO:0007268;GO:0007268;GO:0019992;GO:0019992;GO:0035556;GO:0035556;GO:0046872;GO:0046872;	-	-	-	-	-	-
BGIBMGA012467	308.097	427.793	188.402	0.440404	-1.1831	9.3333e-08	6.70904e-06	scaf56	1295846	1309166	-	2337	-	GO:0005515;GO:0007015;GO:0007015;GO:0007155;GO:0007155;	-	-	-	-	-	-
BGIBMGA013380	2909.21	4330.36	1488.06	0.343635	-1.54105	1.16184e-07	8.29325e-06	scaf50	2491067	2517157	-	10671	-	-	-	-	-	-	-	-
BGIBMGA006406	248.257	369.803	126.71	0.342643	-1.54522	1.54621e-07	1.06324e-05	scaf11	1900222	1942379	-	2742	-	GO:0004252;GO:0004252;GO:0005576;GO:0005576;GO:0006508;GO:0006508;GO:0006508;GO:0006956;GO:0006956;GO:0008233;GO:0008236;GO:0016787;	-	-	-	-	-	-
BGIBMGA006467	398.582	585.13	212.035	0.362372	-1.46445	1.98347e-07	1.32238e-05	scaf11	1422916	1434299	+	3978	-	GO:0005515;GO:0016020;GO:0016021;GO:0016021;	-	-	-	-	-	-
BGIBMGA003998	352.267	481.493	223.042	0.46323	-1.1102	2.08876e-07	1.37858e-05	scaf36	3069071	3070360	-	993	-	-	-	-	-	-	-	-
BGIBMGA002051	53.376	88.6179	18.1341	0.204633	-2.28889	2.35887e-07	1.53373e-05	scaf23	610058	612900	-	312	-	GO:0006508;GO:0006508;GO:0006508;GO:0008233;GO:0008237;GO:0008237;GO:0016020;GO:0016787;GO:0016805;GO:0016805;GO:0016805;GO:0031225;GO:0031225;GO:0046872;GO:0046872;	-	-	-	-	-	-
BGIBMGA008857	348.446	475.667	221.225	0.465084	-1.10444	2.53308e-07	1.63086e-05	scaf17	5355320	5355886	-	267	-	-	-	-	-	-	-	-
BGIBMGA010407	495.074	696.448	293.7	0.421711	-1.24567	2.85989e-07	1.83228e-05	scaf6	4786990	4789721	-	945	-	-	-	-	-	-	-	-
BGIBMGA011212	85.3785	132.562	38.1947	0.288127	-1.79522	3.37414e-07	2.11016e-05	scaf12	4606124	4606501	-	306	-	-	-	-	-	-	-	-
BGIBMGA007249	185.394	264.731	106.057	0.400622	-1.31969	3.39001e-07	2.11016e-05	scaf131	418551	419374	+	762	-	-	-	-	-	-	-	-
BGIBMGA007922	1582.83	2244.51	921.142	0.410398	-1.28491	3.7363e-07	2.29311e-05	scaf3	6832063	6835272	+	3102	-	-	-	-	-	-	-	-
BGIBMGA000210	392.196	529.598	254.794	0.481108	-1.05557	4.18156e-07	2.55445e-05	scaf295	540	3675	+	669	-	GO:0016020;GO:0016021;GO:0016021;	-	-	-	-	-	-
BGIBMGA007037	31.9737	56.9212	7.02627	0.123439	-3.01813	4.27527e-07	2.5996e-05	scaf21	1464574	1465514	-	216	-	GO:0008271;GO:0008271;GO:0008272;GO:0008272;GO:0015116;GO:0015116;GO:0016020;GO:0016020;GO:0016020;GO:0016021;GO:0016021;GO:0016021;GO:0055085;GO:0055085;GO:1902358;	-	-	-	-	-	-
BGIBMGA014224	83.3781	129.602	37.1546	0.286683	-1.80247	4.38882e-07	2.64416e-05	scaf80	1524763	1528391	-	1323	-	-	-	-	-	-	Yellow-f [Source:UniProtKB/TrEMBL;Acc:H9JXF8]"	101736658
BGIBMGA003928	936.393	1296.66	576.125	0.444315	-1.17035	4.99514e-07	2.92884e-05	scaf278	7492	14995	-	3966	-	GO:0003682;GO:0003682;GO:0030154;GO:0030154;	-	-	-	-	-	-
BGIBMGA004110	107.149	161.038	53.2611	0.330737	-1.59624	5.19292e-07	3.00457e-05	scaf36	2446016	2452925	+	1014	-	GO:0005622;GO:0005622;GO:0009190;GO:0009190;GO:0016849;GO:0016849;GO:0035556;GO:0035556;	-	-	-	-	-	-
BGIBMGA014033	138.917	202.99	74.8446	0.368711	-1.43944	6.22404e-07	3.56972e-05	scaf173	12619	15164	-	363	-	-	-	-	-	-	-	-
BGIBMGA002611	6849.88	9289.04	4410.72	0.47483	-1.07452	6.33046e-07	3.61497e-05	scaf20	2291042	2302639	-	2580	-	GO:0005515;GO:0010468;GO:0010468;GO:0046872;GO:0046872;GO:0071557;GO:0071557;GO:0071558;GO:0071558;	-	-	-	-	-	-
BGIBMGA006787	1313.37	1926.13	700.612	0.363742	-1.45901	6.80465e-07	3.78696e-05	scaf10	6969461	6969836	+	267	-	-	-	-	-	-	-	-
BGIBMGA007046	271.494	419.917	123.072	0.293087	-1.7706	7.66199e-07	4.19303e-05	scaf21	538858	543585	-	1380	-	GO:0004252;GO:0004252;GO:0006508;GO:0006508;GO:0006508;GO:0008233;GO:0008236;GO:0016787;	-	-	-	-	-	-
BGIBMGA013539	67.0734	106.476	27.6707	0.259877	-1.9441	8.00681e-07	4.34552e-05	scaf101	1210436	1212800	+	411	-	GO:0046983;GO:0046983;	K09091	-	-	-	-	105841640
BGIBMGA008339	286.06	390.201	181.92	0.466221	-1.10091	9.17853e-07	4.88742e-05	scaf2	5802369	5805125	-	2757	-	-	-	-	-	-	-	-
BGIBMGA001289	55.1851	89.7565	20.6137	0.229662	-2.12241	9.22005e-07	4.88742e-05	scaf1	14276537	14284810	+	510	-	GO:0016020;GO:0016021;GO:0016021;	-	-	-	-	-	-
BGIBMGA006983	335.9	509.994	161.806	0.317271	-1.65621	1.08138e-06	5.63605e-05	scaf21	4854672	4859357	-	1239	-	GO:0016020;GO:0016021;GO:0016021;	-	-	-	-	-	-
BGIBMGA003960	421.137	603.433	238.841	0.395804	-1.33714	1.10024e-06	5.7117e-05	scaf105	896463	905692	+	1680	-	GO:0008271;GO:0008271;GO:0008271;GO:0008272;GO:0008272;GO:0015116;GO:0015116;GO:0016020;GO:0016020;GO:0016020;GO:0016021;GO:0016021;GO:0016021;GO:0055085;GO:0055085;GO:1902358;	-	-	-	-	-	-
BGIBMGA005980	5031.56	7285.23	2777.88	0.381303	-1.39099	1.48252e-06	7.54704e-05	scaf5	5763566	5772183	-	5085	-	GO:0003676;GO:0003676;	-	-	-	-	-	-
BGIBMGA002942	98.3414	147.406	49.2762	0.334288	-1.58084	1.52798e-06	7.71863e-05	scaf30	4393941	4396063	+	813	-	-	-	-	-	-	-	-
BGIBMGA003341	283.871	383.364	184.377	0.480946	-1.05605	2.78001e-06	0.000132292	scaf42	1456067	1464355	-	1326	-	GO:0003676;GO:0003676;	-	-	-	-	-	-
BGIBMGA003240	307.756	415.814	199.699	0.48026	-1.05811	4.23916e-06	0.000189378	scaf73	345638	347718	-	1290	-	-	-	-	-	-	-	-
BGIBMGA000928	174.055	242.558	105.552	0.435163	-1.20037	5.09511e-06	0.000222142	scaf1	10158967	10174306	-	1608	-	GO:0005515;GO:0007605;GO:0007605;GO:0051015;GO:0051015;	-	-	-	-	-	-
BGIBMGA003503	104.888	153.448	56.3289	0.367088	-1.4458	5.3764e-06	0.000231753	scaf9	4829086	4860765	-	4860	-	GO:0005509;GO:0005509;GO:0005515;	-	-	-	-	-	-
BGIBMGA012587	51.579	82.5312	20.6269	0.249928	-2.00041	5.71423e-06	0.000244465	scaf100	832887	839146	-	1158	-	GO:0016020;GO:0016021;GO:0016021;GO:0016021;GO:0022857;GO:0022857;GO:0055085;GO:0055085;	-	-	-	-	-	-
BGIBMGA000779	249.614	337.449	161.78	0.479421	-1.06063	5.91384e-06	0.000252183	scaf89	222696	232112	-	1983	-	GO:0000166;GO:0004672;GO:0004672;GO:0004674;GO:0004674;GO:0004674;GO:0004697;GO:0004697;GO:0004697;GO:0005524;GO:0005524;GO:0005524;GO:0005622;GO:0005622;GO:0006468;GO:0006468;GO:0016301;GO:0016310;GO:0016740;GO:0035556;GO:0035556;GO:0046872;GO:0046872;	-	-	-	-	-	-
BGIBMGA012677	464.007	632.861	295.153	0.466379	-1.10043	6.15519e-06	0.000260781	scaf69	1000877	1002754	-	732	-	-	-	-	-	-	-	-
BGIBMGA012465	234.029	317.276	150.782	0.47524	-1.07327	6.34317e-06	0.000267882	scaf56	1387596	1391399	-	3621	-	-	-	-	-	-	-	-
BGIBMGA006226	230.019	311.889	148.149	0.475005	-1.07399	7.16247e-06	0.000294896	scaf5	8446688	8453069	+	2025	-	-	-	-	-	-	-	-
BGIBMGA008421	1176.09	1599.64	752.537	0.47044	-1.08792	7.64888e-06	0.000311989	scaf2	736972	768509	+	3645	-	GO:0005506;GO:0005506;GO:0016491;GO:0016491;GO:0016614;GO:0046872;GO:0046872;GO:0046872;GO:0050660;GO:0050660;GO:0051536;GO:0051537;GO:0051537;GO:0055114;GO:0055114;GO:0071949;GO:0071949;	-	-	-	-	-	-
BGIBMGA013249	106.275	154.752	57.799	0.373496	-1.42084	8.30787e-06	0.00033267	scaf39	2176093	2176371	+	153	-	-	-	-	-	-	-	-
BGIBMGA010581	276.965	369.898	184.031	0.497518	-1.00718	9.53489e-06	0.000373824	scaf6	7693124	7700622	+	1563	-	-	-	-	-	-	-	-
BGIBMGA011614	191.306	272.917	109.695	0.401938	-1.31496	1.37127e-05	0.000522038	scaf16	5382902	5388152	-	498	-	GO:0004842;GO:0004842;GO:0016020;GO:0016021;GO:0016021;GO:0016567;GO:0016567;GO:0016740;GO:0046872;GO:0046872;	-	-	-	-	-	-
BGIBMGA004339	257.007	343.022	170.992	0.498488	-1.00437	1.45425e-05	0.000545717	scaf79	1155489	1159781	+	1134	-	GO:0007064;GO:0007064;GO:0031390;GO:0031390;	-	-	-	-	-	-
BGIBMGA000848	1485.61	2098.26	872.95	0.416035	-1.26522	1.4771e-05	0.000552712	scaf1	14773140	14781488	-	3393	-	GO:0003676;GO:0003676;	-	-	-	-	-	-
BGIBMGA002578	916.877	1224.76	608.992	0.497232	-1.00801	1.69449e-05	0.000623401	scaf20	4899996	4912007	-	999	-	GO:0003997;GO:0003997;GO:0005777;GO:0005777;GO:0006635;GO:0006635;GO:0016627;GO:0016627;GO:0055114;GO:0055114;	-	-	-	-	-	-
BGIBMGA011409	384.686	518.505	250.866	0.483826	-1.04744	1.92969e-05	0.000696278	scaf12	6317622	6320720	+	642	-	GO:0016020;GO:0016020;GO:0016020;GO:0016021;GO:0016021;	-	-	-	-	-	-
BGIBMGA003202	2010.8	2718.82	1302.79	0.479176	-1.06137	2.37591e-05	0.000834365	scaf13	5893416	5895464	+	1278	-	GO:0032559;GO:0032559;GO:0071900;GO:0071900;	-	-	-	-	-	-
BGIBMGA001347	148.468	205.959	90.9775	0.441727	-1.17877	2.45766e-05	0.000855407	scaf118	605960	609092	-	663	P25	GO:0005198;GO:0005198;GO:0005198;GO:0005576;GO:0005576;GO:0005576;	-	-	-	-	Fibrohexamerin [Source:UniProtKB/Swiss-Prot;Acc:P04148]	-
BGIBMGA002952	407.021	594.357	219.685	0.369618	-1.43589	2.53839e-05	0.000877347	scaf13	6302371	6316979	-	5088	-	GO:0005509;GO:0005509;GO:0005886;GO:0005886;GO:0005886;GO:0007155;GO:0007155;GO:0007155;GO:0007156;GO:0007156;GO:0016020;GO:0016020;GO:0016020;GO:0016021;GO:0016021;	-	-	-	-	-	-
BGIBMGA014209	75.5351	112.331	38.739	0.344864	-1.5359	2.58682e-05	0.000891739	BABH01042926	15731	21870	+	867	-	GO:0016020;GO:0016021;GO:0016021;	-	-	-	-	-	-
BGIBMGA005284	86.7238	126.699	46.7483	0.368971	-1.43842	2.85704e-05	0.000977196	scaf19	6056165	6057827	-	339	-	-	-	-	-	-	-	-
BGIBMGA011789	153.096	241.853	64.3382	0.266022	-1.91039	2.92325e-05	0.000991891	scaf16	1484611	1486512	+	1362	-	GO:0006508;GO:0006508;GO:0006508;GO:0008233;GO:0008237;GO:0008237;GO:0016020;GO:0016021;GO:0016021;GO:0016787;GO:0016805;GO:0016805;GO:0016805;GO:0031225;GO:0031225;GO:0046872;GO:0046872;	-	-	-	-	-	-
BGIBMGA003093	247.205	336.943	157.466	0.467338	-1.09746	3.02226e-05	0.0010152	scaf13	1500441	1508008	+	1137	-	GO:0003779;GO:0003779;GO:0016192;GO:0016192;GO:0045010;GO:0045010;GO:0046872;GO:0046872;	-	-	-	-	-	-
BGIBMGA002050	49.2098	77.3013	21.1184	0.273196	-1.87199	3.20477e-05	0.00107103	scaf23	659798	661061	-	369	-	GO:0006508;GO:0006508;GO:0006508;GO:0008233;GO:0008237;GO:0008237;GO:0016020;GO:0016787;GO:0016805;GO:0016805;GO:0016805;GO:0031225;GO:0031225;GO:0046872;GO:0046872;	-	-	-	-	-	-
BGIBMGA008002	391.906	579.773	204.039	0.351929	-1.50664	4.76517e-05	0.00152648	scaf41	1880326	1894488	-	1575	-	-	K19176	EC:3.5.1.99	-	-	-	101740261
BGIBMGA002677	2401.37	3233.93	1568.82	0.485111	-1.04361	5.19789e-05	0.001653	scaf20	2159330	2161029	+	507	-	-	-	-	-	-	-	101737970
BGIBMGA003705	47.1224	73.662	20.5829	0.279424	-1.83947	5.37432e-05	0.00169679	scaf9	5598857	5602609	+	1950	-	GO:0003676;GO:0003676;	-	-	-	-	-	-
BGIBMGA013389	76.8716	112.547	41.1966	0.36604	-1.44993	5.77965e-05	0.00180738	scaf50	1476327	1476827	-	501	-	-	-	-	-	-	-	-
BGIBMGA003680	321.565	460.126	183.004	0.397726	-1.33015	6.72882e-05	0.00204226	scaf9	3941440	3944628	+	1122	-	GO:0046872;GO:0046872;GO:0046872;	-	-	-	-	-	-
BGIBMGA010966	60.1023	90.5679	29.6368	0.327233	-1.61161	7.30681e-05	0.00217655	scaf83	895022	898069	-	453	-	-	-	-	-	-	-	-
BGIBMGA005121	194.105	273.037	115.172	0.421821	-1.2453	7.77334e-05	0.00229427	scaf32	1517897	1528639	+	675	-	GO:0016491;GO:0016491;GO:0055114;GO:0055114;	-	-	-	-	-	-
BGIBMGA001034	27.9536	48.8633	7.04386	0.144154	-2.79431	7.94228e-05	0.00232844	scaf1	4170683	4171693	-	1011	-	-	-	-	-	-	-	101740370
BGIBMGA012698	50.205	77.264	23.146	0.29957	-1.73903	8.53359e-05	0.0024579	scaf69	562942	569901	+	1443	-	GO:0003677;GO:0003677;GO:0008270;GO:0008270;	-	-	-	-	-	-
BGIBMGA006438	68.0998	100.493	35.7064	0.355312	-1.49284	8.84296e-05	0.00254143	scaf11	687688	690182	-	441	-	-	-	-	-	-	-	-
BGIBMGA003802	99.173	140.078	58.2686	0.415974	-1.26544	9.33017e-05	0.0026756	scaf91	1550600	1553371	+	2679	-	GO:0004383;GO:0004383;GO:0004672;GO:0004672;GO:0004713;GO:0004713;GO:0005524;GO:0005524;GO:0006182;GO:0006468;GO:0006468;GO:0018108;	-	-	-	-	-	-
BGIBMGA001479	120.494	166.582	74.4059	0.446663	-1.16274	0.000105421	0.00297124	scaf7	244051	253518	-	1443	-	GO:0016020;GO:0016021;GO:0016021;	-	-	-	-	-	-
BGIBMGA010735	50.8977	77.6577	24.1378	0.310823	-1.68583	0.0001103	0.00309546	scaf25	2563689	2578616	-	1440	-	GO:0004553;GO:0004553;GO:0005975;GO:0005975;	-	-	-	-	-	-
BGIBMGA005875	140.347	197.238	83.4553	0.423119	-1.24086	0.000112565	0.00311906	scaf67	1578457	1601227	-	3366	-	GO:0000166;GO:0003774;GO:0003777;GO:0003777;GO:0005524;GO:0005524;GO:0005524;GO:0007018;GO:0007018;GO:0008017;GO:0008017;	-	-	-	-	-	-
BGIBMGA005719	156.901	211.255	102.546	0.485414	-1.04271	0.000119369	0.00327305	scaf120	28413	33642	+	393	-	GO:0003677;GO:0003677;GO:0005634;GO:0005634;GO:0016055;GO:0016055;	-	-	-	-	-	-
BGIBMGA012796	106.819	149.29	64.347	0.43102	-1.21417	0.000120866	0.00328148	scaf4	7221004	7223634	-	456	-	-	-	-	-	-	-	101744415
BGIBMGA003287	116.049	160.689	71.4084	0.444388	-1.17011	0.000127383	0.00340743	scaf73	1800573	1806474	+	1404	-	GO:0005515;GO:0016021;GO:0016021;	-	-	-	-	-	-
BGIBMGA003286	189.486	268.338	110.635	0.412295	-1.27825	0.000132657	0.00352695	scaf73	1784481	1797984	+	2763	-	GO:0005515;	-	-	-	-	-	-
BGIBMGA005790	212.179	301.23	123.129	0.408754	-1.29069	0.000134134	0.00355185	scaf54	183692	185928	+	321	-	GO:0016020;GO:0016021;GO:0016021;	-	-	-	-	-	-
BGIBMGA006599	58.3364	87.0403	29.6324	0.340444	-1.55451	0.000140012	0.00367784	scaf10	4853362	4865580	-	1218	-	GO:0005507;GO:0005507;GO:0055114;GO:0055114;	-	-	-	-	-	-
BGIBMGA011612	148.409	199.864	96.9548	0.485104	-1.04363	0.000169181	0.00428961	scaf16	5497538	5498367	-	765	-	-	-	-	-	-	-	-
BGIBMGA005172	34.2537	54.9419	13.5654	0.246905	-2.01797	0.000170347	0.00430717	scaf32	4229880	4234953	+	678	-	GO:0004252;GO:0004252;GO:0006508;GO:0006508;	-	-	-	-	-	-
BGIBMGA011613	30.0615	49.0415	11.0815	0.225961	-2.14585	0.000191949	0.00473883	scaf16	5425059	5425226	-	168	-	-	-	-	-	-	-	-
BGIBMGA004182	116.239	159.617	72.861	0.456474	-1.1314	0.000195322	0.00479313	scaf60	757139	768012	+	1029	-	GO:0004252;GO:0004252;GO:0005777;GO:0005777;GO:0016485;GO:0016485;	-	-	-	-	-	-
BGIBMGA013431	126.881	172.817	80.945	0.468385	-1.09423	0.000199504	0.00483447	scaf111	709434	732462	-	1677	-	GO:0005515;	-	-	-	-	-	-
BGIBMGA013574	41.9965	64.9417	19.0512	0.293359	-1.76926	0.000224453	0.00531166	scaf78	1291754	1303120	-	1278	-	GO:0016020;GO:0016021;GO:0016021;GO:0016021;GO:0022857;GO:0022857;GO:0055085;GO:0055085;	-	-	-	-	-	-
BGIBMGA012680	695.147	954.963	435.332	0.455862	-1.13333	0.000261935	0.00597267	scaf69	889206	899447	-	570	-	GO:0046872;GO:0046872;	-	-	-	-	-	-
BGIBMGA000891	58.3653	86.5803	30.1503	0.348235	-1.52187	0.000308018	0.00688012	scaf1	11339969	11352405	-	1620	-	GO:0004888;GO:0004888;GO:0005216;GO:0005216;GO:0005230;GO:0005230;GO:0005886;GO:0005886;GO:0006811;GO:0006811;GO:0006811;GO:0016020;GO:0016021;GO:0016021;GO:0016021;GO:0034220;GO:0034220;	-	-	-	-	-	-
BGIBMGA001259	57.1416	83.6326	30.6506	0.366491	-1.44815	0.000411702	0.00880789	scaf1	11542177	11551479	+	1761	-	GO:0016020;GO:0016021;GO:0016021;	-	-	-	-	-	-
BGIBMGA005478	118.889	160.362	77.4165	0.482761	-1.05062	0.000508831	0.0103773	scaf19	4162460	4188651	+	4287	-	GO:0004601;GO:0004601;GO:0005509;GO:0005509;GO:0006979;GO:0006979;GO:0016020;GO:0016021;GO:0016021;GO:0016174;GO:0016174;GO:0016491;GO:0016491;GO:0016491;GO:0020037;GO:0020037;GO:0050665;GO:0050665;GO:0055114;GO:0055114;GO:0055114;GO:0098869;	-	-	-	-	-	-
BGIBMGA004544	64.8337	92.978	36.6894	0.394604	-1.34152	0.000511206	0.0104017	scaf48	2031301	2037019	-	678	-	-	-	-	-	-	-	-
BGIBMGA008489	63.9847	93.2679	34.7014	0.372062	-1.42639	0.000526516	0.0105769	scaf2	4754962	4759992	+	1680	-	-	-	-	-	-	-	-
BGIBMGA010929	677.532	959.257	395.807	0.412619	-1.27712	0.000560304	0.0110662	scaf68	739663	747047	-	1293	-	GO:0003677;GO:0003677;GO:0005634;GO:0005634;GO:0006351;GO:0006351;GO:0006355;GO:0006355;GO:0006355;GO:0046983;GO:0046983;	-	-	-	-	-	-
BGIBMGA003239	73.1408	103.031	43.2506	0.419782	-1.25229	0.000668699	0.0128402	scaf73	352653	355973	-	429	-	-	-	-	-	-	-	-
BGIBMGA009797	64.569	91.9219	37.2161	0.404867	-1.30448	0.000771932	0.0143606	scaf27	4122971	4123783	+	813	EN	-	-	-	-	-	Segmentation polarity homeobox protein engrailed[Source:UniProtKB/Swiss-Prot;Acc:P27609]	-
BGIBMGA010270	158.307	214.024	102.59	0.479338	-1.06088	0.000832626	0.0152733	scaf15	5005066	5008714	+	492	-	-	-	-	-	-	-	-
BGIBMGA013128	57.9011	87.6444	28.1578	0.321274	-1.63812	0.000869053	0.015831	scaf124	167050	171851	-	4449	-	-	-	-	-	-	-	-
BGIBMGA010453	463.009	648.346	277.673	0.428279	-1.22338	0.000963135	0.0173285	scaf6	1484720	1498974	-	7578	-	GO:0005509;GO:0005509;GO:0005886;GO:0005886;GO:0007155;GO:0007155;GO:0007156;GO:0007156;GO:0016020;GO:0016020;GO:0016020;GO:0016021;GO:0016021;	-	-	-	-	-	-
BGIBMGA014586	117.453	157.981	76.925	0.486925	-1.03823	0.0009699	0.0174263	scaf482	16543	17280	-	738	-	-	-	-	-	-	-	101744296
BGIBMGA012842	99.4217	134.483	64.3602	0.478574	-1.06319	0.00102173	0.0181383	scaf4	4037917	4047584	-	465	-	-	-	-	-	-	-	-
BGIBMGA010152	7.94976	15.3948	0.504703	0.0327839	-4.93087	0.00107322	0.0188193	scaf15	2612919	2614998	-	720	-	-	-	-	-	-	-	-
BGIBMGA007834	80.6287	111.06	50.1977	0.451988	-1.14564	0.00118851	0.0203719	scaf3	2775708	2789570	+	1476	-	-	-	-	-	-	-	-
BGIBMGA001971	50.338	73.0448	27.6312	0.378277	-1.40249	0.00124859	0.0210513	scaf28	3784515	3787475	+	168	-	-	-	-	-	-	-	-
BGIBMGA006856	1958.29	2698.24	1218.35	0.451535	-1.14709	0.00126684	0.0212245	scaf70	734157	825505	+	56262	-	GO:0003700;GO:0003700;GO:0005509;GO:0005509;GO:0005576;GO:0005576;GO:0005634;GO:0005634;GO:0006355;GO:0006355;GO:0008270;GO:0008270;GO:0010466;GO:0016020;GO:0016021;GO:0016021;GO:0030414;GO:0030414;	-	-	-	-	Notch-like protein[Source:UniProtKB/TrEMBL;Acc:Q2F5X6]	-
BGIBMGA005788	183.585	250.611	116.559	0.4651	-1.10439	0.00127804	0.021356	scaf54	157357	157590	+	234	-	-	-	-	-	-	-	-
BGIBMGA007563	944.253	1302.12	586.382	0.450327	-1.15095	0.00128636	0.0214405	scaf66	520744	521298	+	555	-	-	-	-	-	-	-	-
BGIBMGA012466	165.029	245.093	84.9651	0.346665	-1.52839	0.00134176	0.0220836	scaf56	1309903	1328322	-	1704	-	-	-	-	-	-	-	-
BGIBMGA010567	110.248	147.609	72.8874	0.493787	-1.01804	0.00142696	0.0233106	scaf6	6589252	6594094	+	681	-	-	-	-	-	-	-	-
BGIBMGA013024	218.742	342.386	95.0987	0.277753	-1.84813	0.00146033	0.0237082	scaf4	5510589	5519071	+	675	-	GO:0016020;GO:0016021;GO:0016021;	-	-	-	-	-	-
BGIBMGA003111	47.9988	69.8233	26.1742	0.374863	-1.41556	0.0014681	0.023805	scaf13	2599343	2607681	+	1209	-	GO:0004180;GO:0004185;GO:0004185;GO:0004185;GO:0006508;GO:0006508;GO:0006508;GO:0008233;GO:0016020;GO:0016021;GO:0016021;GO:0016787;	K09645	EC:3.4.16.-	-	-	-	101738672
BGIBMGA007853	100.337	134.334	66.3394	0.493839	-1.01789	0.00156661	0.0249706	scaf3	3730080	3732341	+	240	-	-	-	-	-	-	-	-
BGIBMGA005227	284.803	396.568	173.037	0.436338	-1.19648	0.0016518	0.0260146	scaf110	141484	144389	+	315	-	GO:0005524;GO:0005524;GO:0016887;GO:0016887;	-	-	-	-	-	-
BGIBMGA013066	60.2354	84.8084	35.6624	0.420506	-1.2498	0.00171291	0.0267826	scaf4	7255521	7255931	+	411	-	-	-	-	-	-	-	-
BGIBMGA007428	21.4229	34.8145	8.03128	0.230688	-2.11599	0.00171659	0.0267926	scaf55	1961306	1963950	+	600	-	GO:0016020;GO:0016021;GO:0016021;	-	-	-	-	-	-
BGIBMGA010066	53.0105	75.8355	30.1855	0.398039	-1.32902	0.00175618	0.0271911	scaf45	1250011	1251562	+	408	-	GO:0005543;GO:0005543;GO:0005545;GO:0005545;GO:0030136;GO:0030136;GO:0030276;GO:0030276;GO:0048268;GO:0048268;	-	-	-	-	-	-
BGIBMGA001287	23.0103	36.98	9.04069	0.244475	-2.03224	0.00177592	0.0273125	scaf1	14233795	14234245	+	315	-	-	-	-	-	-	-	-
BGIBMGA010357	57.1208	80.5892	33.6524	0.41758	-1.25988	0.00193947	0.0290788	scaf6	8137737	8167553	-	5058	-	GO:0005515;	-	-	-	-	-	-
BGIBMGA006622	58.6269	82.5393	34.7146	0.420583	-1.24954	0.00196888	0.0293806	scaf10	3533440	3541682	-	318	-	GO:0016020;GO:0016021;GO:0016021;	-	-	-	-	-	-
BGIBMGA011679	71.7309	98.7455	44.7163	0.452844	-1.14291	0.00207637	0.0305387	scaf16	1730307	1730833	-	438	-	-	-	-	-	-	-	-
BGIBMGA002035	19.6595	32.2927	7.02627	0.217581	-2.20038	0.00209464	0.0307386	scaf23	1606823	1626905	-	10284	-	GO:0005515;	-	-	-	-	-	-
BGIBMGA013662	131.957	178.436	85.4785	0.479044	-1.06177	0.00211261	0.0308987	scaf162	255891	256676	+	639	-	-	-	-	-	-	-	-
BGIBMGA007697	860.497	1276.23	444.767	0.348501	-1.52076	0.00243111	0.0342967	scaf3	4387186	4387992	-	807	-	GO:0043565;GO:0043565;	-	-	-	-	-	101736485
BGIBMGA001879	78.7209	106.625	50.8167	0.476592	-1.06917	0.00262686	0.0365479	scaf28	2375223	2379334	-	801	-	-	-	-	-	-	-	-
BGIBMGA000929	62.5533	86.9074	38.1991	0.439538	-1.18594	0.00263888	0.0366375	scaf1	10146118	10146883	-	375	-	-	-	-	-	-	-	-
BGIBMGA010410	58.461	81.7731	35.1489	0.429835	-1.21815	0.00269964	0.0371667	scaf6	4584829	4593398	-	735	-	-	-	-	-	-	-	-
BGIBMGA008999	593.55	798.456	388.645	0.486746	-1.03876	0.00286046	0.0390532	scaf17	3307298	3317498	+	2949	-	-	-	-	-	-	-	-
BGIBMGA011644	61.5942	91.9672	31.2212	0.339482	-1.55859	0.00296209	0.0400661	scaf16	3329045	3336828	-	3030	-	GO:0060271;GO:0060271;GO:0090162;GO:0090162;GO:0097539;GO:0097539;	-	-	-	-	-	-
BGIBMGA013390	96.4153	131.565	61.266	0.465672	-1.10261	0.00305209	0.0409686	scaf50	1408911	1409453	-	543	-	-	-	-	-	-	-	-
BGIBMGA005097	3358.72	4763.69	1953.76	0.410136	-1.28583	0.00305377	0.0409686	scaf32	24432	25823	+	1074	-	-	-	-	-	-	-	-
BGIBMGA008482	17.4389	28.8477	6.03006	0.209031	-2.25821	0.00308825	0.0413046	scaf2	4459291	4463978	+	606	-	GO:0003677;GO:0003677;GO:0003677;GO:0005634;GO:0005634;GO:0006355;GO:0006355;GO:0043565;GO:0043565;	K09339	-	-	-	-	101744413
BGIBMGA012699	1450.28	2121.11	779.449	0.367473	-1.44429	0.00323667	0.0429832	scaf69	691978	700845	+	5823	-	GO:0006211;GO:0070579;GO:0080111;	-	-	-	-	-	-
BGIBMGA012947	63.6513	92.5924	34.7102	0.374871	-1.41553	0.00338445	0.0444748	scaf4	1341486	1347407	+	534	-	GO:0009166;GO:0009166;GO:0016787;GO:0016787;	-	-	-	-	-	-
BGIBMGA003646	381.069	555.488	206.65	0.372016	-1.42656	0.00353848	0.0457078	scaf9	2481791	2505492	+	2919	-	GO:0005515;GO:0016020;GO:0016021;GO:0016021;	-	-	-	-	-	-
BGIBMGA006288	27.7072	42.367	13.0475	0.307965	-1.69916	0.00353927	0.0457078	scaf49	218166	219563	-	1398	-	GO:0016020;GO:0016021;GO:0016021;	-	-	-	-	-	-
BGIBMGA005789	42.4535	62.7924	22.1146	0.352186	-1.50559	0.00354641	0.0457498	scaf54	179684	180130	+	333	-	GO:0016020;GO:0016021;GO:0016021;	-	-	-	-	-	-
BGIBMGA004535	564.187	781.342	347.032	0.444148	-1.17089	0.00359058	0.0461435	scaf97	1035659	1036427	+	186	-	-	-	-	-	-	-	-
BGIBMGA012479	2453.92	3534.04	1373.79	0.388731	-1.36316	0.00370068	0.047106	scaf56	366145	375670	-	2511	-	GO:0008270;GO:0008270;	-	-	-	-	-	-
BGIBMGA001523	61.315	84.444	38.186	0.452205	-1.14495	0.00372356	0.0472966	scaf7	2646606	2647557	+	210	-	-	-	-	-	-	-	-
BGIBMGA008797	58.8898	81.595	36.1847	0.443468	-1.1731	0.00384705	0.0485248	scaf115	749047	749379	+	333	-	GO:0003676;GO:0003676;	-	-	-	-	-	101742865
BGIBMGA001742	562.18	758.598	365.762	0.482155	-1.05243	0.00391214	0.0492165	scaf35	849609	861673	+	1017	-	GO:0005484;GO:0005484;GO:0005622;GO:0005622;GO:0006886;GO:0006886;GO:0016020;GO:0016020;GO:0016192;GO:0016192;GO:0061025;	-	-	-	-	-	-
BGIBMGA003851	19.688	31.3403	8.03568	0.256401	-1.96353	0.0053756	0.0625914	scaf72	1473937	1483913	-	1749	-	GO:0005216;GO:0005216;GO:0005244;GO:0005249;GO:0005249;GO:0005267;GO:0006811;GO:0006811;GO:0006811;GO:0006813;GO:0006813;GO:0006813;GO:0008076;GO:0008076;GO:0016020;GO:0016020;GO:0016020;GO:0016021;GO:0034765;GO:0034765;GO:0051260;GO:0051260;GO:0055085;GO:0055085;GO:0071805;	-	-	-	-	-	-
BGIBMGA006461	3003.08	4157.38	1848.78	0.4447	-1.1691	0.00545047	0.0630586	scaf11	1088208	1106736	+	4998	-	GO:0004672;GO:0004672;GO:0005524;GO:0005524;GO:0006468;GO:0006468;	-	-	-	-	-	-
BGIBMGA003683	49.3668	69.0572	29.6764	0.429736	-1.21848	0.00545413	0.0630586	scaf9	4108597	4120435	+	1251	-	GO:0005506;GO:0005506;GO:0016705;GO:0016705;GO:0020037;GO:0020037;GO:0055114;GO:0055114;	-	-	-	-	-	-
BGIBMGA000850	70.5712	94.8988	46.2436	0.487294	-1.03714	0.00547714	0.0632689	scaf1	14482149	14492948	-	1302	-	GO:0005515;	-	-	-	-	-	-
BGIBMGA006449	84.9006	120.525	49.2762	0.408847	-1.29037	0.0057204	0.0650028	scaf11	425282	427563	+	537	-	-	-	-	-	-	-	-
BGIBMGA013757	7.46702	13.929	1.00501	0.0721521	-3.79281	0.00589565	0.0666955	scaf47	799000	805975	-	1095	-	GO:0003824;GO:0003824;GO:0005975;GO:0005975;GO:0016810;GO:0016810;	-	-	-	-	-	-
BGIBMGA008146	16086.1	24084.8	8087.45	0.335791	-1.57437	0.0062971	0.0700899	scaf52	919601	925319	-	771	-	-	-	-	-	-	-	-
BGIBMGA003660	19.2867	30.5289	8.04447	0.263504	-1.92411	0.00635128	0.0704541	scaf9	3076051	3083667	+	1113	-	-	-	-	-	-	-	-
BGIBMGA000245	32.0017	49.9113	14.0921	0.282343	-1.82448	0.00639367	0.0706261	scaf18	3596471	3600742	-	513	BMORCPR130	GO:0042302;GO:0042302;GO:0042302;	-	-	-	-	Putative cuticle protein[Source:UniProtKB/TrEMBL;Acc:C0H6X2]	100379349
BGIBMGA010216	61.33	82.9862	39.6737	0.478075	-1.06469	0.0074003	0.0782482	scaf15	2101934	2108675	+	1509	-	GO:0005615;GO:0005615;	-	-	-	-	-	-
BGIBMGA007833	58.455	79.1979	37.712	0.476174	-1.07044	0.00740953	0.0782482	scaf3	2763215	2764909	+	1695	-	-	-	-	-	-	-	-
BGIBMGA005013	4328.32	5833.34	2823.3	0.483994	-1.04694	0.00768973	0.0797921	scaf32	4127914	4131055	-	1386	-	-	-	-	-	-	-	-
BGIBMGA000378	24.7669	37.4562	12.0777	0.322449	-1.63286	0.00769222	0.0797921	scaf18	987747	1017562	+	2340	-	-	-	-	-	-	-	-
BGIBMGA007533	15.2467	24.9637	5.52975	0.221511	-2.17455	0.00770438	0.0797921	scaf66	614742	627626	-	1689	-	-	-	-	-	-	-	-
BGIBMGA006283	554.556	743.166	365.946	0.492415	-1.02205	0.00773206	0.0798545	scaf49	603134	617064	-	5526	-	-	-	-	-	-	-	105843010
BGIBMGA013604	43.6809	61.7494	25.6123	0.414779	-1.26959	0.00775862	0.0799343	scaf78	119642	122829	-	1065	-	GO:0003676;GO:0003676;GO:0003723;GO:0003730;GO:0003730;GO:0006417;GO:0006417;GO:0045182;GO:0045182;	-	-	-	-	-	-
BGIBMGA005029	15.158	24.7775	5.53854	0.223531	-2.16145	0.00782848	0.0803276	scaf32	3487316	3502276	-	1329	-	GO:0016020;GO:0016021;GO:0016021;	-	-	-	-	-	-
BGIBMGA000238	18.7465	30.9759	6.51717	0.210395	-2.24883	0.00784456	0.0804297	scaf18	4599000	4611061	-	1458	-	GO:0004601;GO:0004601;GO:0006979;GO:0006979;GO:0020037;GO:0020037;GO:0042600;GO:0042600;GO:0055114;GO:0055114;GO:0098869;	-	-	-	-	-	-
BGIBMGA013570	5.93329	11.3619	0.504703	0.0444207	-4.49262	0.00814065	0.0827428	scaf130	498345	499074	+	657	-	-	-	-	-	-	-	101743261
BGIBMGA007365	19.5829	30.6034	8.56236	0.279785	-1.83761	0.00836703	0.0845328	scaf55	1158943	1168708	-	1326	-	GO:0004252;GO:0004252;GO:0006508;GO:0006508;	-	-	-	-	-	-
BGIBMGA014614	24.611	37.1662	12.0557	0.324373	-1.62427	0.00862122	0.0862387	scaf590	1786	2838	-	1053	-	GO:0003676;GO:0003676;	-	-	-	-	-	-
BGIBMGA012530	60.7848	81.8476	39.722	0.485317	-1.043	0.00865947	0.0863862	scaf77	1084924	1085709	-	786	-	-	-	-	-	-	-	-
BGIBMGA000716	61.3066	82.8956	39.7177	0.479128	-1.06152	0.00879789	0.0875271	scaf8	6138564	6151644	+	1629	-	GO:0003677;GO:0003677;GO:0003677;GO:0003700;GO:0003700;GO:0003707;GO:0003707;GO:0005634;GO:0005634;GO:0005634;GO:0006351;GO:0006351;GO:0006355;GO:0006355;GO:0006355;GO:0008270;GO:0008270;GO:0043401;GO:0043565;GO:0043565;GO:0046872;	-	-	-	-	-	-
BGIBMGA012111	11.7162	19.9039	3.52852	0.177278	-2.49592	0.0089511	0.0885269	scaf24	3056671	3074928	+	1575	-	GO:0016020;GO:0016020;GO:0016020;GO:0016021;GO:0016021;GO:0022857;GO:0022857;GO:0055085;GO:0055085;	-	-	-	-	-	-
BGIBMGA008419	22.478	34.3836	10.5724	0.307483	-1.70142	0.00899489	0.0887662	scaf2	682499	685542	+	339	-	GO:0016020;GO:0016021;GO:0016021;	-	-	-	-	-	-
BGIBMGA011903	225.422	303.656	147.188	0.484718	-1.04478	0.00910061	0.0895336	scaf59	1870560	1870754	-	195	-	GO:0016020;GO:0016021;GO:0016021;	-	-	-	-	-	-
BGIBMGA014523	50.9688	69.7861	32.1515	0.460715	-1.11805	0.00925525	0.09058	scaf357	12706	18604	+	924	-	GO:0003824;GO:0003824;GO:0008152;GO:0016829;GO:0016829;	-	-	-	-	-	-
BGIBMGA005337	12.4097	20.7818	4.03762	0.194287	-2.36374	0.00965747	0.0927287	scaf19	3707291	3733688	-	3030	-	GO:0005515;	-	-	-	-	-	-
BGIBMGA013912	21.3492	32.6571	10.0413	0.307477	-1.70145	0.0105722	0.0985579	scaf29	2295587	2306766	-	1173	-	-	-	-	-	-	-	-
BGIBMGA008869	9.72711	16.9351	2.51912	0.148751	-2.74903	0.0107611	0.0993574	scaf17	4392188	4395617	-	1509	-	GO:0016020;GO:0016021;GO:0016021;GO:0016021;GO:0055085;GO:0055085;	-	-	-	-	-	-
BGIBMGA000895	52.9503	71.6908	34.2099	0.477187	-1.06737	0.0111206	0.10157	scaf1	11143401	11149906	-	2121	-	-	-	-	-	-	-	-
BGIBMGA001151	28.147	41.2364	15.0576	0.365152	-1.45343	0.0117615	0.105516	scaf1	6335567	6338393	+	762	-	GO:0016020;GO:0016021;GO:0016021;	-	-	-	-	-	-
BGIBMGA006901	51.4757	69.7861	33.1653	0.475242	-1.07326	0.0119759	0.107074	scaf44	2271815	2275763	-	753	-	-	K14443	-	-	-	-	101744020
BGIBMGA009747	30.0737	43.5801	16.5673	0.380157	-1.39533	0.0120109	0.107314	scaf27	1253238	1265393	+	1461	-	-	-	-	-	-	-	-
BGIBMGA006188	65.2882	87.3303	43.2462	0.495203	-1.01391	0.0125022	0.110327	scaf5	6593474	6593653	+	180	-	-	-	-	-	-	-	-
BGIBMGA003903	13.2576	22.5083	4.00685	0.178016	-2.48992	0.0127245	0.111788	scaf200	12264	14966	-	621	-	-	-	-	-	-	-	-
BGIBMGA012645	30.4962	43.9072	17.0852	0.389119	-1.36172	0.0130138	0.113797	scaf129	42334	42762	-	429	-	-	-	-	-	-	-	-
BGIBMGA008850	431.296	581.342	281.25	0.483794	-1.04754	0.0145048	0.123545	scaf17	5658645	5673879	-	477	-	-	-	-	-	-	-	-
BGIBMGA006299	140.845	196.658	85.031	0.432379	-1.20963	0.0148463	0.125882	scaf49	581009	586212	+	813	-	-	-	-	-	-	-	-
BGIBMGA009585	26.9489	39.3317	14.566	0.370339	-1.43308	0.0151331	0.127384	scaf103	556802	566460	-	1323	-	-	-	-	-	-	-	-
BGIBMGA009887	24.6607	36.2431	13.0783	0.36085	-1.47053	0.0152342	0.12777	scaf51	1046943	1048619	+	1233	-	GO:0004930;GO:0004930;GO:0007186;GO:0007186;GO:0016020;GO:0016021;GO:0016021;GO:0016021;GO:0016500;GO:0016500;	-	-	-	-	-	-
BGIBMGA006799	47.3584	64.0266	30.6902	0.479334	-1.0609	0.0158476	0.131518	scaf70	1905474	1945501	-	3333	-	GO:0000166;GO:0004383;GO:0004383;GO:0004672;GO:0004672;GO:0005524;GO:0005524;GO:0005622;GO:0005622;GO:0006182;GO:0006468;GO:0006468;GO:0009190;GO:0009190;GO:0016020;GO:0016021;GO:0016021;GO:0016829;GO:0016849;GO:0016849;GO:0035556;GO:0035556;	-	-	-	-	-	-
BGIBMGA008104	41.5556	57.0249	26.0863	0.457455	-1.1283	0.0160392	0.132514	scaf87	381126	383913	-	339	-	-	-	-	-	-	-	-
BGIBMGA008349	52.2561	69.8153	34.697	0.496983	-1.00873	0.0160979	0.132891	scaf2	4250477	4251715	-	1239	-	-	-	-	-	-	-	-
BGIBMGA001857	9.09974	15.6848	2.51472	0.160329	-2.64089	0.0162734	0.133752	scaf28	3117016	3121153	-	3831	-	GO:0005576;GO:0005576;GO:0006030;GO:0006030;GO:0008061;GO:0008061;	-	-	-	-	-	-
BGIBMGA012215	61.6403	84.1249	39.1558	0.465449	-1.10331	0.0163163	0.133936	scaf168	177116	184721	-	705	-	GO:0005515;	-	-	-	-	-	-
BGIBMGA002637	41.9605	59.8447	24.0763	0.402312	-1.31361	0.0163805	0.134379	scaf20	411675	412963	-	339	-	GO:0006812;GO:0006812;GO:0015297;GO:0015299;GO:0015299;GO:0016020;GO:0016021;GO:0016021;GO:0016021;GO:0055085;GO:0055085;GO:1902600;	-	-	-	-	-	-
BGIBMGA001528	343.283	461.712	224.855	0.487003	-1.038	0.0170626	0.138097	scaf7	3087089	3091476	+	1998	-	-	-	-	-	-	-	-
BGIBMGA009838	48.5923	65.5377	31.6468	0.482879	-1.05027	0.0170912	0.138224	scaf51	2071792	2080950	-	1704	-	-	-	-	-	-	-	-
BGIBMGA009269	1365.71	1836.69	894.731	0.487142	-1.03758	0.0175238	0.1406	scaf38	1380622	1398931	+	3801	-	-	-	-	-	-	-	-
BGIBMGA013435	39.6209	54.652	24.5898	0.449933	-1.15222	0.0177421	0.141829	scaf111	624690	640042	-	1500	-	GO:0016020;GO:0016021;GO:0016021;GO:0016021;GO:0055085;GO:0055085;	-	-	-	-	-	-
BGIBMGA010961	340.682	532.409	148.956	0.279777	-1.83765	0.018416	0.145796	scaf83	1374978	1376447	-	264	-	-	-	-	-	-	-	-
BGIBMGA006490	11.4069	18.8026	4.01124	0.213335	-2.22881	0.0190306	0.149656	scaf11	3825274	3826613	+	270	-	GO:0016020;GO:0016021;GO:0016021;	-	-	-	-	-	-
BGIBMGA013033	11.3576	18.6908	4.02443	0.215316	-2.21547	0.0192142	0.150439	scaf4	5802915	5805457	+	411	-	-	-	-	-	-	-	-
BGIBMGA011312	27.5372	39.4726	15.6018	0.395257	-1.33914	0.0198888	0.15393	scaf12	794312	796392	+	327	-	-	-	-	-	-	-	-
BGIBMGA005091	30.0266	42.4415	17.6118	0.414968	-1.26893	0.0211007	0.160413	scaf32	414961	444746	-	1677	-	GO:0004252;GO:0004252;GO:0006508;GO:0006508;	-	-	-	-	-	-
BGIBMGA007369	47.9022	64.1092	31.6952	0.494394	-1.01627	0.0217275	0.163333	scaf55	742868	745353	-	618	-	GO:0003677;GO:0003677;GO:0005634;GO:0005634;GO:0006351;GO:0006351;GO:0006355;GO:0006355;	-	-	-	-	-	-
BGIBMGA005184	47.1407	63.1568	31.1245	0.492813	-1.02089	0.0226336	0.168234	scaf119	600667	601375	-	180	-	-	-	-	-	-	-	-
BGIBMGA003967	26.6243	38.1558	15.0927	0.395555	-1.33805	0.0228293	0.169282	scaf36	4055612	4057512	-	303	-	GO:0006644;GO:0006644;GO:0016020;GO:0016021;GO:0016021;GO:0016311;GO:0030111;GO:0030111;GO:0042577;GO:0042577;	-	-	-	-	-	-
BGIBMGA012721	27.921	39.7706	16.0714	0.404101	-1.30721	0.0234491	0.172442	scaf93	1452803	1459827	-	714	-	GO:0005634;GO:0005634;GO:0006355;GO:0006355;	-	-	-	-	-	-
BGIBMGA002748	20.7619	33.5058	8.01809	0.239305	-2.06308	0.0236707	0.173488	scaf117	469424	486163	+	4560	-	GO:0005509;GO:0005509;GO:0005886;GO:0005886;GO:0007155;GO:0007155;GO:0007156;GO:0007156;GO:0016020;GO:0016020;GO:0016020;GO:0016021;GO:0016021;	-	-	-	-	-	-
BGIBMGA012683	18.2485	27.9698	8.52719	0.304871	-1.71373	0.0240387	0.175793	scaf69	683699	683848	-	150	-	-	-	-	-	-	-	-
BGIBMGA004276	6806.91	9504.58	4109.24	0.432343	-1.20975	0.0241866	0.17649	scaf79	1184485	1196931	-	1914	-	GO:0004611;GO:0004611;GO:0004613;GO:0004613;GO:0005525;GO:0005525;GO:0006094;GO:0006094;GO:0017076;GO:0017076;	-	-	-	-	-	-
BGIBMGA005351	2197.02	3009.04	1385	0.460279	-1.11942	0.0243725	0.177306	scaf19	2603466	2627154	-	3564	-	GO:0005089;GO:0005089;GO:0035023;GO:0035023;	-	-	-	-	-	-
BGIBMGA004925	25.1891	36.3256	14.0525	0.386849	-1.37016	0.0244711	0.177768	scaf65	1199083	1202442	-	516	-	GO:0016020;GO:0016021;GO:0016021;	-	-	-	-	-	101738037
BGIBMGA002148	53.8559	76.9952	30.7165	0.398941	-1.32575	0.0245433	0.178013	scaf23	4589526	4616211	+	9339	-	GO:0003777;GO:0003777;GO:0005524;GO:0005524;GO:0007018;GO:0007018;GO:0016887;GO:0016887;GO:0030286;GO:0030286;	K10408	-	-	-	-	101738460
BGIBMGA002506	41.6083	56.0725	27.144	0.484088	-1.04666	0.0248266	0.179457	scaf14	3187299	3194489	+	918	-	GO:0004930;GO:0004930;GO:0004930;GO:0004995;GO:0004995;GO:0005886;GO:0005886;GO:0007165;GO:0007186;GO:0007186;GO:0007186;GO:0007217;GO:0016020;GO:0016021;GO:0016021;GO:0016021;	-	-	-	-	-	-
BGIBMGA006740	42.5389	65.4471	19.6307	0.299947	-1.73722	0.0249364	0.179867	scaf10	4413306	4415258	+	1332	-	GO:0005507;GO:0005507;GO:0016020;GO:0016021;GO:0016021;GO:0055114;GO:0055114;	-	-	-	-	-	-
BGIBMGA007947	39.7583	53.8778	25.6387	0.475868	-1.07137	0.025618	0.183261	scaf3	8260076	8263410	+	333	-	GO:0000166;GO:0005524;GO:0005524;GO:0016209;GO:0016491;GO:0032542;GO:0032542;GO:0032542;GO:0055114;GO:0055114;GO:0055114;GO:0098869;	-	-	-	-	Sulfiredoxin [Source:UniProtKB/TrEMBL;Acc:H9JEK0]"	-
BGIBMGA010611	290.454	398.422	182.486	0.458022	-1.12651	0.0256975	0.183445	scaf84	1205881	1218629	-	1083	BMORKPAE	GO:0006629;GO:0006629;GO:0006633;GO:0006633;GO:0016020;GO:0016021;GO:0016021;GO:0016491;GO:0016717;GO:0016717;GO:0055114;GO:0055114;GO:0055114;	K00507	EC:1.14.19.1	-	-	Acyl-CoA desaturase BmorKPAE[Source:UniProtKB/TrEMBL;Acc:H9JM59]	101736567
BGIBMGA004459	18.7908	28.0362	9.54539	0.340466	-1.55442	0.0266812	0.188708	scaf37	1701271	1708573	+	744	-	GO:0060271;	-	-	-	-	-	-
BGIBMGA006948	40.2421	54.354	26.1302	0.480742	-1.05667	0.0268026	0.189464	scaf44	1186320	1192366	+	1746	-	-	-	-	-	-	-	-
BGIBMGA009784	4.72422	8.94373	0.504703	0.0564309	-4.14737	0.0275814	0.193512	scaf27	3762122	3762777	+	231	-	-	-	-	-	-	-	-
BGIBMGA012214	26.1547	37.2035	15.1059	0.406035	-1.30032	0.0282105	0.196014	scaf239	12449	13118	-	222	-	-	-	-	-	-	-	-
BGIBMGA010221	745.301	1001.37	489.23	0.488561	-1.03339	0.0293612	0.201268	scaf15	2480277	2503263	+	12657	-	GO:0003677;GO:0003700;GO:0003700;GO:0005515;GO:0005634;GO:0005634;GO:0005634;GO:0006351;GO:0006351;GO:0006355;GO:0006355;GO:0006355;GO:0008168;GO:0008168;GO:0008270;GO:0008270;GO:0016740;GO:0032259;GO:0043565;GO:0043565;GO:0046872;	-	-	-	-	-	-
BGIBMGA003288	29.9692	42.375	17.5635	0.414477	-1.27064	0.0302221	0.205221	scaf73	1815800	1819122	+	1026	-	-	-	-	-	-	-	-
BGIBMGA000686	29.7316	41.3773	18.0858	0.437094	-1.19399	0.0303536	0.205492	scaf8	4610849	4619793	+	1590	-	-	-	-	-	-	-	-
BGIBMGA012504	40.1859	55.2027	25.1692	0.455942	-1.13308	0.0309233	0.208708	scaf56	1793390	1806247	+	1167	-	GO:0004888;GO:0004888;GO:0005216;GO:0005216;GO:0005230;GO:0005230;GO:0005886;GO:0005886;GO:0006811;GO:0006811;GO:0006811;GO:0016020;GO:0016021;GO:0016021;GO:0016021;GO:0034220;GO:0034220;	-	-	-	-	-	-
BGIBMGA003821	41.1383	55.1282	27.1484	0.49246	-1.02192	0.0315182	0.210723	scaf107	342424	348537	-	672	-	GO:0003700;GO:0003700;GO:0005634;GO:0005634;GO:0005634;GO:0005667;GO:0005667;GO:0005737;GO:0005737;GO:0006351;GO:0006355;GO:0006355;GO:0046983;GO:0046983;	-	-	-	-	-	-
BGIBMGA014561	27.1684	38.2303	16.1065	0.421302	-1.24707	0.0320251	0.212746	scaf517	1418	3261	+	366	-	-	-	-	-	-	-	-
BGIBMGA008617	11.2952	18.0657	4.52474	0.250461	-1.99734	0.0320447	0.212746	scaf136	181378	185559	-	1305	-	-	-	-	-	-	-	-
BGIBMGA014527	23.7726	34.9716	12.5736	0.359538	-1.47578	0.0329262	0.21558	scaf411	6710	11674	+	318	-	GO:0005524;GO:0005524;	-	-	-	-	-	-
BGIBMGA013051	8.98326	14.9559	3.01063	0.201301	-2.31258	0.0347037	0.222705	scaf4	6397159	6408522	+	1458	-	GO:0004252;GO:0004252;GO:0006508;GO:0006508;	-	-	-	-	-	101746529
BGIBMGA008765	31.2171	42.8431	19.5911	0.457275	-1.12887	0.0356689	0.226317	scaf115	243296	245252	-	1137	-	GO:0003676;GO:0003676;	-	-	-	-	-	-
BGIBMGA004237	10.4655	16.8979	4.03323	0.238683	-2.06683	0.0362716	0.228375	scaf150	301542	301802	-	261	-	-	-	-	-	-	-	-
BGIBMGA001937	18.7554	28.4832	9.0275	0.316941	-1.65771	0.0368302	0.230733	scaf28	2000158	2007545	+	399	-	GO:0005515;	-	-	-	-	-	-
BGIBMGA014550	3.20692	6.41384	0	0	-Inf	0.0369679	0.231028	scaf452	17961	22613	+	684	-	GO:0006629;GO:0006629;GO:0006633;GO:0006633;GO:0016021;GO:0016021;GO:0016491;GO:0016717;GO:0016717;GO:0055114;GO:0055114;GO:0055114;	-	-	-	-	-	-
BGIBMGA004665	435.865	603.154	268.575	0.445284	-1.1672	0.0370706	0.231189	scaf135	284105	284491	+	387	-	-	-	-	-	-	-	-
BGIBMGA002949	36.8814	49.6295	24.1334	0.486272	-1.04016	0.0374733	0.232597	scaf13	6635849	6637165	-	1317	-	GO:0005509;GO:0005509;GO:0007156;GO:0007156;GO:0016020;GO:0016020;	-	-	-	-	-	-
BGIBMGA014603	15.44	23.3489	7.53097	0.32254	-1.63245	0.0380843	0.234973	scaf577	4201	5586	+	384	-	-	-	-	-	-	-	-
BGIBMGA013651	7.08763	12.1652	2.01002	0.165226	-2.59748	0.0387966	0.237444	scaf162	106130	119397	-	1443	-	GO:0005215;GO:0005215;GO:0016020;GO:0016021;GO:0016021;GO:0016021;GO:0022857;GO:0022857;GO:0055085;GO:0055085;	-	-	-	-	-	-
BGIBMGA012258	7.53279	13.0512	2.01442	0.154348	-2.69575	0.0388174	0.23746	scaf26	2073585	2076213	-	1470	-	GO:0005509;GO:0005509;GO:0016020;GO:0016021;GO:0016021;GO:0016021;GO:0016079;GO:0016079;GO:0045202;GO:0098793;GO:0098793;	-	-	-	-	-	-
BGIBMGA011000	17.5222	25.9906	9.05388	0.348352	-1.52138	0.0391235	0.238864	scaf83	1323535	1328371	+	1209	-	GO:0004046;GO:0004046;GO:0005737;GO:0005737;GO:0006508;GO:0006508;GO:0006520;GO:0006520;GO:0008237;GO:0008237;GO:0016787;GO:0016787;	K14677	EC:3.5.1.14	-	-	-	101742389
BGIBMGA009268	96.2471	129.692	62.8021	0.48424	-1.04621	0.0402036	0.242328	scaf38	1312816	1313102	+	198	-	GO:0005515;	-	-	-	-	-	-
BGIBMGA004094	29.082	40.0606	18.1034	0.4519	-1.14593	0.0403746	0.243028	scaf36	1687451	1692203	+	810	-	GO:0016020;GO:0016021;GO:0016021;	-	-	-	-	-	-
BGIBMGA002315	8.6893	14.368	3.01063	0.209538	-2.25472	0.0416536	0.247659	scaf34	1785669	1787093	+	1095	-	-	-	-	-	-	-	-
BGIBMGA000858	43.6812	60.7759	26.5866	0.437453	-1.1928	0.0420805	0.24907	scaf1	14181243	14200450	-	4068	-	GO:0016020;GO:0016021;GO:0016021;	-	-	-	-	-	-
BGIBMGA008731	17.2239	25.4027	9.04508	0.356068	-1.48977	0.044483	0.257569	scaf90	1452388	1459597	+	954	-	GO:0005576;GO:0005576;GO:0052689;GO:0052689;	-	-	-	-	-	-
BGIBMGA000763	4.21079	7.91687	0.504703	0.0637503	-3.97142	0.0451373	0.259344	scaf89	916560	916877	-	318	-	-	-	-	-	-	-	-
BGIBMGA005030	19.9963	29.9118	10.0809	0.33702	-1.56909	0.0456417	0.260747	scaf32	3466637	3475173	-	840	-	GO:0016020;GO:0016021;GO:0016021;	-	-	-	-	-	-
BGIBMGA005432	5.13577	9.27092	1.00061	0.10793	-3.21183	0.0460466	0.26249	scaf19	1095201	1101652	+	1896	-	GO:0016020;GO:0016021;GO:0016021;	-	-	-	-	-	-
BGIBMGA012979	2.98745	5.97491	0	0	-Inf	0.0482855	0.270095	scaf4	3431819	3436275	+	525	-	-	-	-	-	-	-	-
BGIBMGA003504	10.7485	16.9724	4.52474	0.266595	-1.90728	0.0492994	0.274131	scaf9	4812411	4817961	-	1065	-	GO:0005509;GO:0005509;GO:0005515;	-	-	-	-	-	-
BGIBMGA006002	2.93158	5.86316	0	0	-Inf	0.0497649	0.275301	scaf5	4502310	4508762	-	2217	-	GO:0007155;GO:0007155;GO:0007229;GO:0007229;GO:0016020;GO:0016021;GO:0016021;	-	-	-	-	Integrin beta[Source:UniProtKB/TrEMBL;Acc:H9J910]	-
