# Supplementary material for: Corona or hydrochloric acid modulates embryonic diapause in silkworms by activating different signaling pathways
Source: PeerJ. 2025 Feb 20;13:e18966. doi: 10.7717/peerj.18966 (PMC11847486; doi:10.7717/peerj.18966)
Supplement: Table S10 [file peerj-13-18966-s011.xlsx]

## Sheet: Sheet1
id	baseMean	baseMeanA	baseMeanB	foldChange	log2FoldChange	pval	padj	Chromosome	Start Site	End Site	Direction	Length	Name	GO	KEGG	EC	eggNOG Class	eggNOG	Description	NCBI_GI
BGIBMGA007093	4520.65	1750.97	7290.33	4.16359	2.05783	3.89533e-63	1.25478e-59	scaf21	3069304	3083971	+	951	-	GO:0005739;GO:0005743;GO:0005743;GO:0005743;GO:0015187;GO:0015187;GO:0015187;GO:0016020;GO:0016021;GO:0016021;GO:0022857;GO:1904983;GO:1904983;GO:1904983;	K15118	-	-	-	-	101745781
BGIBMGA004950	1432.53	596.342	2268.72	3.8044	1.92767	1.655e-44	2.13247e-41	scaf65	285749	299325	-	2799	-	GO:0003824;GO:0003824;GO:0004329;GO:0004329;GO:0004488;GO:0004488;GO:0005524;GO:0005524;GO:0055114;GO:0055114;	K00288	-	-	-	-	101743494
BGIBMGA014115	2936.44	1405.25	4467.63	3.17925	1.66869	1.48049e-39	1.58968e-36	scaf76	114373	123093	-	1149	-	GO:0004553;GO:0004553;GO:0004563;GO:0004563;GO:0005975;GO:0005975;	-	-	-	-	-	-
BGIBMGA003865	397.777	125.132	670.423	5.35773	2.42162	3.20159e-36	2.9466e-33	scaf72	577935	582712	-	486	-	GO:0005739;GO:0005739;GO:0005960;GO:0005960;GO:0005960;GO:0019464;GO:0019464;GO:0019464;	K02437	-	-	-	-	101743217
BGIBMGA010933	585.988	225.217	946.759	4.20377	2.07168	7.80003e-35	5.58352e-32	scaf68	173739	183779	-	2052	-	GO:0016020;GO:0016021;GO:0016021;GO:0016021;GO:0055085;GO:0055085;	-	-	-	-	-	-
BGIBMGA012491	347.142	126.59	567.694	4.48452	2.16495	7.46401e-28	3.56199e-25	scaf56	758638	767858	+	1584	-	-	K19176	EC:3.5.1.99	-	-	-	101741517
BGIBMGA010772	342.673	125.318	560.028	4.46884	2.1599	1.42277e-27	6.32151e-25	scaf25	301924	303170	-	369	-	-	-	-	-	-	-	-
BGIBMGA014116	1283.6	501.237	2065.95	4.12171	2.04324	1.52015e-26	6.31845e-24	scaf76	79490	97045	-	1611	GLCNACASE3	GO:0004553;GO:0004553;GO:0004563;GO:0004563;GO:0004563;GO:0005975;GO:0005975;GO:0008152;GO:0016787;GO:0016798;GO:0102148;GO:0102148;	-	-	-	-	Beta-hexosaminidase[Source:UniProtKB/TrEMBL;Acc:H9JX51]	-
BGIBMGA014578	100.912	13.9089	187.914	13.5104	3.756	2.52751e-24	8.57026e-22	scaf576	18710	19552	-	843	-	GO:0000786;GO:0000786;GO:0003677;GO:0003677;GO:0003677;GO:0005634;GO:0005634;GO:0005634;GO:0005694;GO:0006334;GO:0006334;	K11275	-	-	-	-	101740214
BGIBMGA000475	6110.83	3330.44	8891.22	2.66968	1.41667	7.20846e-24	2.38156e-21	scaf18	5806256	5810434	+	1197	CRT	GO:0005509;GO:0005509;GO:0005515;GO:0005783;GO:0005783;GO:0005783;GO:0006457;GO:0006457;GO:0051082;GO:0051082;	-	-	-	-	Calreticulin [Source:UniProtKB/Swiss-Prot;Acc:Q7Z1E6]	-
BGIBMGA001386	2594.52	1334.18	3854.85	2.8893	1.53072	1.90531e-22	5.5321e-20	scaf7	8282876	8284130	-	1098	-	GO:0000287;GO:0000287;GO:0004749;GO:0004749;GO:0009116;GO:0009116;GO:0009156;GO:0009156;GO:0009165;GO:0009165;GO:0044249;GO:0044249;	-	-	-	-	-	-
BGIBMGA013449	5415.54	2554.71	8276.37	3.23966	1.69584	2.83675e-22	7.94597e-20	scaf111	177836	179225	-	396	HIS2AV	GO:0000786;GO:0000786;GO:0000786;GO:0003677;GO:0003677;GO:0003677;GO:0005634;GO:0005634;GO:0005634;GO:0005694;GO:0046982;GO:0046982;	-	-	-	-	Histone H2A [Source:UniProtKB/TrEMBL;Acc:H9JV86]"	-
BGIBMGA004140	230.312	81.6274	378.996	4.643	2.21506	5.63443e-22	1.54467e-19	scaf36	3943021	3944694	+	1674	-	GO:0016874;GO:0016874;	K01969	EC:6.4.1.4	-	-	-	101744540
BGIBMGA009514	917.993	507.798	1328.19	2.61558	1.38713	2.45671e-21	6.33095e-19	scaf40	1897883	1909990	+	1674	-	GO:0003824;GO:0003824;GO:0004474;GO:0004474;GO:0006097;GO:0006097;	-	-	-	-	Malate synthase[Source:UniProtKB/TrEMBL;Acc:H9JJ13]	-
BGIBMGA001621	295.382	122.014	468.749	3.84175	1.94176	4.00508e-21	1.01187e-18	scaf35	3545812	3565702	-	1992	-	GO:0003676;GO:0003676;	-	-	-	-	-	-
BGIBMGA011308	1044.2	595.675	1492.73	2.50595	1.32536	1.18879e-20	2.63701e-18	scaf12	568603	576257	+	1059	-	GO:0003995;GO:0003995;GO:0016491;GO:0016627;GO:0016627;GO:0050660;GO:0050660;GO:0050660;GO:0055114;GO:0055114;GO:0055114;	-	-	-	-	-	-
BGIBMGA004998	477.841	234.029	721.652	3.08361	1.62462	1.35956e-20	2.91965e-18	scaf65	1643091	1651704	+	2661	-	-	-	-	-	-	-	-
BGIBMGA013134	1097.72	630.942	1564.49	2.47961	1.31011	2.04442e-20	4.24878e-18	scaf124	177740	181773	+	960	CDC2	GO:0000166;GO:0004672;GO:0004672;GO:0004674;GO:0004674;GO:0005524;GO:0005524;GO:0005524;GO:0006468;GO:0006468;	K02087	-	-	-	Bm cdc2 [Source:UniProtKB/TrEMBL;Acc:O17507]"	693060
BGIBMGA006536	1027.61	591.785	1463.44	2.47292	1.30621	6.27844e-20	1.20743e-17	scaf11	6799690	6799911	+	222	-	-	-	-	-	-	-	-
BGIBMGA004034	69.776	8.15741	131.395	16.1074	4.00965	1.65345e-19	2.98753e-17	scaf36	820725	841519	-	849	-	GO:0004930;GO:0004930;GO:0007186;GO:0007186;GO:0008528;GO:0008528;GO:0016020;GO:0016021;GO:0016021;GO:0016021;	-	-	-	-	-	-
BGIBMGA004952	4113.58	2544.85	5682.31	2.23287	1.1589	1.6694e-19	2.98753e-17	scaf65	199919	214806	-	2247	-	GO:0004888;GO:0004888;GO:0007166;GO:0007166;GO:0016020;GO:0016021;GO:0016021;GO:0016021;	-	-	-	-	-	-
BGIBMGA009323	341.955	156.932	526.979	3.35801	1.74761	3.26459e-19	5.60857e-17	scaf53	1729955	1737712	-	732	-	GO:0004616;GO:0050661;GO:0050661;	-	-	-	-	-	-
BGIBMGA008215	105.236	23.2959	187.175	8.03469	3.00624	3.81065e-19	6.46055e-17	scaf121	586826	587935	-	1110	-	GO:0016491;GO:0016491;GO:0055114;GO:0055114;	-	-	-	-	-	101744754
BGIBMGA007072	2640.56	943.009	4338.11	4.60029	2.20172	1.20799e-18	1.97025e-16	scaf21	1678853	1680196	+	1344	-	-	-	-	-	-	-	-
BGIBMGA011589	5788.79	2607.78	8969.81	3.43964	1.78226	1.57415e-18	2.53537e-16	scaf22	4875833	4877474	+	351	-	-	-	-	-	-	-	101740613
BGIBMGA000425	792.695	452.623	1132.77	2.50268	1.32347	1.80276e-18	2.83275e-16	scaf18	3040504	3051120	+	933	-	GO:0008152;GO:0016020;GO:0016021;GO:0016021;GO:0016746;GO:0016746;	-	-	-	-	-	-
BGIBMGA002602	6699.51	4434.29	8964.74	2.02169	1.01556	2.75491e-18	4.22583e-16	scaf20	2581921	2585372	-	579	-	-	-	-	-	-	-	-
BGIBMGA012441	534.966	285.874	784.058	2.74267	1.45558	3.90855e-18	5.78869e-16	scaf86	249541	256444	+	882	-	-	-	-	-	-	-	101742052
BGIBMGA007424	1581.59	985.954	2177.23	2.20825	1.1429	5.66707e-18	8.11336e-16	scaf55	1805480	1812563	+	1500	-	GO:0016020;GO:0016021;GO:0016021;	-	-	-	-	-	-
BGIBMGA010154	1250.43	529.16	1971.7	3.7261	1.89766	6.05947e-18	8.5157e-16	scaf15	2534231	2534834	-	444	-	GO:0004170;GO:0004170;GO:0046080;GO:0046080;	K01520	EC:3.6.1.23	-	-	-	101741979
BGIBMGA007000	732.278	415.771	1048.79	2.52251	1.33486	6.08028e-18	8.5157e-16	scaf21	3459444	3464365	-	1140	-	GO:0005515;	-	-	-	-	-	-
BGIBMGA010464	5832.52	3126.11	8538.92	2.73149	1.44969	7.38217e-18	1.01779e-15	scaf6	1045301	1047007	-	345	-	-	-	-	-	-	-	101744904
BGIBMGA001202	753.346	274.588	1232.1	4.48711	2.16579	7.4251e-18	1.01779e-15	scaf1	8961319	8968471	+	1554	-	GO:0046872;GO:0046872;	-	-	-	-	-	-
BGIBMGA006539	391.632	196.104	587.16	2.99412	1.58213	1.37093e-17	1.82107e-15	scaf11	6817663	6828908	+	1944	-	GO:0006508;GO:0006508;GO:0008237;GO:0008237;GO:0008241;GO:0008241;GO:0016020;GO:0016020;GO:0016020;GO:0016021;GO:0016021;	-	-	-	-	-	-
BGIBMGA008415	868.141	296.479	1439.8	4.85634	2.27987	3.35698e-17	4.28264e-15	scaf2	479588	485797	+	801	-	GO:0016020;GO:0016021;GO:0016021;GO:0022857;GO:0022857;GO:0055085;GO:0055085;	-	-	-	-	-	-
BGIBMGA004560	114.492	32.7629	196.221	5.9891	2.58234	1.3019e-16	1.56775e-14	scaf48	1080054	1085918	-	1437	-	GO:0005215;GO:0005215;GO:0016020;GO:0016020;GO:0016020;GO:0016021;GO:0016021;GO:0016021;GO:0022857;GO:0022857;GO:0055085;GO:0055085;	-	-	-	-	-	-
BGIBMGA004302	1942.44	1171.81	2713.06	2.31527	1.21118	2.59398e-16	3.0385e-14	scaf79	526019	530206	-	999	-	GO:0003676;GO:0003676;GO:0003723;GO:0003723;GO:0003743;GO:0003743;GO:0006413;	K03237	-	-	-	-	693063
BGIBMGA011755	1372.48	825.002	1919.96	2.32721	1.2186	5.99539e-16	6.43755e-14	scaf16	495913	498991	+	1587	-	GO:0004672;GO:0004672;GO:0004674;GO:0004674;GO:0005524;GO:0005524;GO:0006468;GO:0006468;	-	-	-	-	-	-
BGIBMGA004612	9703.78	1679.28	17728.3	10.557	3.40013	7.58473e-16	7.88139e-14	scaf128	617708	619858	-	2151	HSP90	GO:0000166;GO:0005515;GO:0005524;GO:0005524;GO:0005524;GO:0005737;GO:0005737;GO:0006457;GO:0006457;GO:0006950;GO:0051082;GO:0051082;	K04079	-	-	-	90-kDa heat shock protein[Source:UniProtKB/TrEMBL;Acc:Q9BLC5]	692420
BGIBMGA006173	1195.58	761.111	1630.05	2.14167	1.09874	1.46639e-15	1.51156e-13	scaf5	5761547	5762644	+	867	-	GO:0003676;GO:0003676;GO:0003746;GO:0003746;GO:0005634;GO:0005634;GO:0005634;GO:0006351;GO:0006351;GO:0006355;GO:0006355;GO:0006414;GO:0008270;GO:0008270;GO:0046872;	K03145	-	-	-	Transcription elongation factor S-II[Source:UniProtKB/TrEMBL;Acc:Q1HQ13]	732942
BGIBMGA000391	1185.78	486.112	1885.44	3.87862	1.95554	3.01161e-15	3.05548e-13	scaf18	1492145	1508728	+	2928	-	GO:0003824;GO:0003824;GO:0004375;GO:0004375;GO:0004375;GO:0005739;GO:0005739;GO:0006520;GO:0006520;GO:0006544;GO:0006544;GO:0006546;GO:0006546;GO:0016491;GO:0016829;GO:0016829;GO:0055114;GO:0055114;GO:0055114;	-	-	-	-	-	-
BGIBMGA005428	1020.19	646.546	1393.83	2.15582	1.10823	5.8569e-15	5.71714e-13	scaf19	1023845	1030288	+	1227	-	-	-	-	-	-	-	-
BGIBMGA001950	1584.5	1045.09	2123.92	2.0323	1.02311	6.11455e-15	5.92376e-13	scaf28	2714552	2718850	+	696	-	GO:0003676;GO:0003676;GO:0003723;GO:0003723;GO:0003723;GO:1904247;GO:1904247;	-	-	-	-	-	-
BGIBMGA001695	1274.5	821.44	1727.56	2.10309	1.07251	6.8185e-15	6.50788e-13	scaf35	496476	501713	-	1953	-	GO:0003824;GO:0003824;GO:0004559;GO:0004559;GO:0005975;GO:0005975;GO:0006013;GO:0006013;GO:0030246;GO:0030246;	-	-	-	-	-	-
BGIBMGA010352	2007.68	923.593	3091.77	3.34755	1.74311	7.79461e-15	7.38482e-13	scaf109	853867	867351	+	1284	-	GO:0004046;GO:0004046;GO:0005737;GO:0005737;GO:0006508;GO:0006508;GO:0006520;GO:0006520;GO:0008237;GO:0008237;GO:0016787;GO:0016787;	-	-	-	-	-	-
BGIBMGA014049	488.717	278.611	698.823	2.50824	1.32667	9.04698e-15	8.50878e-13	scaf218	51002	76771	+	5295	-	GO:0009166;GO:0009166;GO:0016787;GO:0016787;	-	-	-	-	-	-
BGIBMGA006120	1787.22	1189.29	2385.15	2.00552	1.00398	1.00646e-14	9.32968e-13	scaf5	2045275	2046327	+	1053	-	GO:0003676;GO:0003676;	-	-	-	-	-	-
BGIBMGA006405	6565.92	2786.73	10345.1	3.71228	1.89231	1.05591e-14	9.69521e-13	scaf11	1954699	1958794	-	1086	-	GO:0003676;GO:0003676;GO:0003723;GO:0003723;	-	-	-	-	-	-
BGIBMGA008222	166.458	66.972	265.944	3.97098	1.9895	1.16268e-14	1.05501e-12	scaf121	181241	183625	-	345	-	-	-	-	-	-	-	-
BGIBMGA009096	32.0716	0.521502	63.6218	121.997	6.9307	1.28037e-14	1.15367e-12	scaf63	970619	974589	+	528	-	-	-	-	-	-	-	-
BGIBMGA005726	588.897	349.809	827.985	2.36697	1.24304	1.36259e-14	1.21924e-12	scaf123	567680	586782	-	2910	-	GO:0000166;GO:0000166;GO:0000166;GO:0005524;GO:0005524;GO:0006812;GO:0006812;GO:0016020;GO:0016021;GO:0016021;GO:0016021;GO:0016787;GO:0016887;GO:0016887;GO:0046872;GO:0046872;	-	-	-	-	-	-
BGIBMGA001118	654.833	245.14	1064.53	4.34251	2.11853	1.39826e-14	1.24253e-12	scaf1	3831478	3840079	+	825	-	GO:0000287;GO:0000287;GO:0005737;GO:0005737;GO:0008253;GO:0008253;GO:0016311;	-	-	-	-	-	-
BGIBMGA004109	845.986	528.825	1163.15	2.1995	1.13717	1.52989e-14	1.33194e-12	scaf36	2436436	2438390	+	1893	-	GO:0003676;GO:0003676;GO:0003723;GO:0003723;	-	-	-	-	-	-
BGIBMGA007393	2925.06	1624.3	4225.82	2.60162	1.37941	1.60518e-14	1.37885e-12	scaf55	508118	508483	+	366	-	GO:0003677;GO:0003677;GO:0005634;GO:0005634;	K11295	-	-	-	-	101739065
BGIBMGA008532	1581.68	1047.73	2115.63	2.01925	1.01382	1.73366e-14	1.47181e-12	scaf2	8307607	8308493	+	564	-	-	-	-	-	-	-	-
BGIBMGA001137	437.865	242.174	633.557	2.61612	1.38743	2.09991e-14	1.75697e-12	scaf1	5506756	5509494	+	762	TYMS	GO:0004799;GO:0004799;GO:0006231;GO:0006231;GO:0032259;	-	-	-	-	Thymidylate synthase[Source:UniProtKB/TrEMBL;Acc:H9IV57]	-
BGIBMGA008821	511.469	294.13	728.808	2.47785	1.30909	4.34748e-14	3.5231e-12	scaf113	24135	32365	+	1368	-	GO:0008152;GO:0016740;GO:0016746;GO:0016746;GO:0016746;	-	-	-	-	-	-
BGIBMGA000582	258.188	128.086	388.29	3.03148	1.60002	5.33526e-14	4.26986e-12	scaf8	1329639	1333212	-	1647	-	GO:0016020;GO:0016021;GO:0016021;	-	-	-	-	-	101744139
BGIBMGA004566	68.1956	14.3354	122.056	8.51426	3.08988	5.52023e-14	4.39063e-12	scaf48	974298	975383	-	1086	-	GO:0016020;GO:0016021;GO:0016021;GO:0016021;GO:0022857;GO:0022857;GO:0055085;GO:0055085;	-	-	-	-	-	-
BGIBMGA003229	378.464	208.525	548.404	2.62991	1.39502	7.53008e-14	5.84489e-12	scaf73	984456	986959	-	2358	-	GO:0004420;GO:0004420;GO:0008299;GO:0008299;GO:0015936;GO:0015936;GO:0016020;GO:0016021;GO:0016021;GO:0016021;GO:0016616;GO:0016616;GO:0050661;GO:0050661;GO:0050662;GO:0050662;GO:0055114;GO:0055114;	-	-	-	-	-	-
BGIBMGA009310	675.308	416.666	933.951	2.24149	1.16446	9.97918e-14	7.56363e-12	scaf53	2519707	2521644	-	1938	-	GO:0004672;GO:0004672;GO:0005524;GO:0005524;GO:0006468;GO:0006468;	-	-	-	-	-	-
BGIBMGA013536	1672.41	691.988	2652.84	3.83365	1.93872	1.10936e-13	8.31056e-12	scaf101	956749	958038	+	1056	DNAJ-5	GO:0006457;GO:0006457;GO:0051082;GO:0051082;	-	-	-	-	DnaJ-5 [Source:UniProtKB/TrEMBL;Acc:H6VTP5]"	692539
BGIBMGA006813	1039.83	679.56	1400.1	2.0603	1.04285	1.50969e-13	1.10525e-11	scaf70	1336534	1344733	-	2826	-	GO:0005515;GO:0005643;GO:0005643;GO:0006913;GO:0006913;GO:0017056;GO:0017056;	-	-	-	-	-	-
BGIBMGA010333	489.171	289.581	688.762	2.37848	1.25004	2.39138e-13	1.72139e-11	scaf109	84654	88531	+	684	-	GO:0000398;GO:0000398;GO:0003676;GO:0003676;GO:0003723;GO:0003723;GO:0003723;GO:0046872;GO:0046872;GO:0046872;GO:0089701;GO:0089701;	K12836	-	-	-	-	101742886
BGIBMGA002988	264.486	131.911	397.062	3.01006	1.58979	3.62167e-13	2.53615e-11	scaf13	4907488	4913847	-	525	-	GO:0016020;GO:0016020;GO:0016020;GO:0016021;GO:0016021;GO:0022857;GO:0022857;GO:0055085;GO:0055085;	-	-	-	-	-	-
BGIBMGA009467	269.459	139.627	399.29	2.85969	1.51586	4.26327e-13	2.95451e-11	scaf40	1117760	1124646	-	837	-	GO:0004342;GO:0004342;GO:0004342;GO:0005737;GO:0005737;GO:0005975;GO:0005975;GO:0005975;GO:0006044;GO:0006044;GO:0016787;	K02564	EC:3.5.99.6	-	-	-	101746460
BGIBMGA010523	518.523	313.985	723.061	2.30285	1.20342	5.56095e-13	3.7712e-11	scaf6	2170520	2177388	+	1644	-	GO:0000139;GO:0000139;GO:0005794;GO:0006486;GO:0006486;GO:0016020;GO:0016021;GO:0016021;GO:0016740;GO:0016757;GO:0016757;GO:0030246;GO:0030246;	-	-	-	-	-	-
BGIBMGA009342	361.245	203.337	519.154	2.55317	1.35229	6.58092e-13	4.41641e-11	scaf53	255370	263236	-	1437	-	GO:0000030;GO:0005783;GO:0005789;GO:0005789;GO:0006506;GO:0016020;GO:0016021;GO:0016021;GO:0016757;GO:0016757;GO:0016757;	-	-	-	-	-	-
BGIBMGA005167	859.124	561.493	1156.76	2.06014	1.04274	1.19048e-12	7.74716e-11	scaf32	4025020	4027739	+	792	-	GO:0004497;GO:0004499;GO:0004499;GO:0016491;GO:0050660;GO:0050660;GO:0050661;GO:0050661;GO:0055114;GO:0055114;GO:0055114;	-	-	-	-	-	-
BGIBMGA005426	409.866	239.887	579.845	2.41716	1.27331	1.5784e-12	1.01688e-10	scaf19	1015805	1020139	+	1296	-	GO:0003677;GO:0003677;GO:0005634;GO:0005634;	-	-	-	-	-	-
BGIBMGA007777	292.321	77.2687	507.374	6.56636	2.71509	1.70845e-12	1.09519e-10	scaf3	472925	478767	+	870	-	-	-	-	-	-	-	-
BGIBMGA004029	476.462	288.6	664.325	2.30189	1.20282	1.87048e-12	1.19313e-10	scaf36	1185687	1195164	-	807	-	GO:0046872;GO:0046872;GO:0046872;	-	-	-	-	-	-
BGIBMGA008443	927.971	613.033	1242.91	2.02747	1.01968	2.35746e-12	1.46743e-10	scaf2	1823020	1824613	+	1071	-	GO:0005634;GO:0005634;GO:0031144;GO:0031144;GO:0071630;GO:0071630;	-	-	-	-	-	101738001
BGIBMGA012133	48.0646	7.55592	88.5733	11.7224	3.55119	2.91372e-12	1.7793e-10	scaf24	4721118	4725179	+	657	-	-	-	-	-	-	-	-
BGIBMGA013453	521.467	322.196	720.738	2.23696	1.16154	3.41423e-12	2.07511e-10	scaf111	34350	40085	-	909	CDK2	GO:0000166;GO:0004672;GO:0004672;GO:0004674;GO:0004674;GO:0005524;GO:0005524;GO:0005524;GO:0006468;GO:0006468;GO:0016301;GO:0016310;	K02206	EC:2.7.11.22	-	-	Cyclin dependent kinase 2[Source:UniProtKB/TrEMBL;Acc:H6VMF4]	101738936
BGIBMGA005594	718.234	446.957	989.511	2.21388	1.14658	7.22617e-12	4.25156e-10	scaf33	72565	86332	-	2991	-	GO:0005515;GO:0007051;GO:0007051;	-	-	-	-	-	-
BGIBMGA009043	104.836	36.6683	173.004	4.71807	2.2382	8.32149e-12	4.87375e-10	scaf63	1897384	1906396	-	1032	-	GO:0016491;GO:0016616;GO:0016616;GO:0051287;GO:0051287;GO:0055114;GO:0055114;GO:0055114;	-	-	-	-	-	-
BGIBMGA005444	287.961	137.769	438.152	3.18033	1.66918	1.15994e-11	6.64259e-10	scaf19	1630820	1632747	+	1233	-	GO:0016491;GO:0016627;GO:0016627;GO:0050660;GO:0050660;GO:0050660;GO:0055114;GO:0055114;GO:0055114;	-	-	-	-	-	-
BGIBMGA007952	381.4	226.286	536.514	2.37095	1.24547	1.25207e-11	7.07586e-10	scaf3	8389276	8400178	+	816	-	GO:0005375;GO:0005375;GO:0016020;GO:0016021;GO:0016021;GO:0016021;GO:0035434;GO:0035434;	-	-	-	-	-	-
BGIBMGA011483	369.654	44.5058	694.803	15.6115	3.96454	1.60141e-11	8.85589e-10	scaf22	1139263	1140291	-	1029	-	GO:0016787;GO:0016787;	-	-	-	-	-	-
BGIBMGA007045	208.845	106.156	311.533	2.93467	1.5532	1.6211e-11	8.92646e-10	scaf21	612053	624850	-	3531	-	GO:0005515;GO:0007009;GO:0007009;	-	-	-	-	-	-
BGIBMGA014117	681.667	447.351	915.983	2.04757	1.03391	2.14932e-11	1.15875e-09	scaf76	70699	75695	-	690	-	GO:0016311;GO:0016791;GO:0016791;	-	-	-	-	-	-
BGIBMGA005226	348.567	204.087	493.047	2.41587	1.27254	2.20391e-11	1.17345e-09	scaf110	44749	63074	-	1596	-	GO:0000166;GO:0005524;GO:0005524;GO:0005524;GO:0016020;GO:0016020;GO:0016020;GO:0016021;GO:0016021;GO:0016887;GO:0016887;	-	-	-	-	-	-
BGIBMGA001238	524.806	286.955	762.657	2.65776	1.41021	2.23689e-11	1.17726e-09	scaf1	10852173	10868852	+	2058	-	GO:0000166;GO:0000166;GO:0004812;GO:0004812;GO:0004817;GO:0004817;GO:0005524;GO:0005524;GO:0006418;GO:0006418;GO:0006423;GO:0006423;	-	-	-	-	-	-
BGIBMGA011246	562.494	360.82	764.167	2.11786	1.08261	4.44314e-11	2.24509e-09	scaf12	3033742	3035895	-	228	-	GO:0006221;GO:0006221;GO:0007049;GO:0045747;GO:0045747;	-	-	-	-	-	-
BGIBMGA000926	1254.85	823.046	1686.65	2.04928	1.03511	4.50322e-11	2.26656e-09	scaf1	10198866	10205197	-	999	-	GO:0003824;GO:0003824;GO:0004801;GO:0004801;GO:0004801;GO:0005737;GO:0005737;GO:0005975;GO:0005975;GO:0006098;GO:0006098;GO:0006098;GO:0016740;	-	-	-	-	Transaldolase[Source:UniProtKB/TrEMBL;Acc:H9IUJ6]	-
BGIBMGA009235	599.622	388.916	810.328	2.08355	1.05905	5.10182e-11	2.51866e-09	scaf38	1554493	1556832	-	2340	-	-	-	-	-	-	-	-
BGIBMGA005151	864.952	502.898	1227.01	2.43987	1.2868	5.14925e-11	2.53237e-09	scaf32	2848376	2856304	+	2028	-	GO:0000166;GO:0003677;GO:0003677;GO:0003677;GO:0003688;GO:0003688;GO:0004386;GO:0004386;GO:0005524;GO:0005524;GO:0005524;GO:0005634;GO:0005634;GO:0005634;GO:0006260;GO:0006260;GO:0006260;GO:0006270;GO:0006270;GO:0016787;GO:0042555;GO:0042555;	-	-	-	-	-	-
BGIBMGA013236	30.8143	2.50087	59.1278	23.6429	4.56334	8.08526e-11	3.90182e-09	scaf39	1600636	1603780	+	1383	-	GO:0004497;GO:0004497;GO:0005506;GO:0005506;GO:0016020;GO:0016021;GO:0016021;GO:0016491;GO:0016705;GO:0016705;GO:0020037;GO:0020037;GO:0046872;GO:0055114;GO:0055114;GO:0055114;	-	-	-	-	-	-
BGIBMGA003355	251.736	139.387	364.085	2.61204	1.38518	8.23779e-11	3.9606e-09	scaf42	669972	676803	-	924	-	GO:0005525;GO:0005525;	K16185	-	-	-	-	101742921
BGIBMGA009732	145.409	57.4783	233.34	4.05961	2.02134	9.78759e-11	4.58593e-09	scaf27	551930	553655	+	1089	-	GO:0005634;GO:0005634;GO:0006338;GO:0006338;	-	-	-	-	-	-
BGIBMGA000480	160.293	77.6836	242.903	3.12683	1.6447	1.27069e-10	5.8684e-09	scaf8	7900451	7903168	-	1185	-	-	-	-	-	-	-	-
BGIBMGA004711	845.488	458.815	1232.16	2.68553	1.42521	1.34375e-10	6.13981e-09	scaf108	400604	406369	+	1371	-	GO:0000166;GO:0003678;GO:0003678;GO:0004386;GO:0005524;GO:0005524;GO:0005524;GO:0005634;GO:0006281;GO:0006281;GO:0006325;GO:0006325;GO:0006351;GO:0006355;GO:0006974;GO:0016787;GO:0031011;GO:0031011;GO:0032508;GO:0035267;GO:0035267;GO:0043141;GO:0043141;GO:0097255;GO:0097255;	K04499	-	-	-	-	101739823
BGIBMGA001490	9533.89	6322.53	12745.3	2.01585	1.01139	1.60289e-10	7.2214e-09	scaf7	115147	120033	+	1209	FKBP45	GO:0000412;GO:0000413;GO:0003755;GO:0003755;GO:0005528;GO:0005730;GO:0016853;	K14826	EC:5.2.1.8	-	-	Peptidyl-prolyl cis-trans isomerase[Source:UniProtKB/TrEMBL;Acc:Q4JI71]	692771
BGIBMGA000714	1443.16	597.453	2288.87	3.83105	1.93774	2.22161e-10	9.80323e-09	scaf8	5995152	6001614	+	1395	-	GO:0016020;GO:0016021;GO:0016021;	K14209	-	-	-	-	101746014
BGIBMGA000964	910.21	471.035	1349.38	2.86472	1.51839	2.54541e-10	1.11178e-08	scaf1	8153334	8163530	-	5865	-	-	-	-	-	-	-	-
BGIBMGA002939	513.13	255.182	771.078	3.02168	1.59535	2.56956e-10	1.11854e-08	scaf30	4346099	4349398	+	672	-	-	-	-	-	-	-	-
BGIBMGA000404	272.079	156.852	387.306	2.46925	1.30407	2.73147e-10	1.18104e-08	scaf18	2225404	2238603	+	1413	-	-	-	-	-	-	-	-
BGIBMGA014350	53.9784	13.1058	94.851	7.23732	2.85546	3.03326e-10	1.30005e-08	scaf2320	298	816	+	519	-	GO:0016020;GO:0016021;GO:0016021;	-	-	-	-	-	-
BGIBMGA001001	66.0143	13.0792	118.95	9.09459	3.18501	3.15207e-10	1.34485e-08	scaf1	6071748	6072329	-	582	-	GO:0003677;GO:0003677;GO:0006357;GO:0006357;GO:0046983;GO:0046983;	-	-	-	-	-	-
BGIBMGA004614	202.598	107.507	297.688	2.769	1.46937	3.45445e-10	1.469e-08	scaf128	599080	601061	-	1668	-	GO:0000166;GO:0005524;GO:0005524;	-	-	-	-	-	-
BGIBMGA009675	455.063	291.169	618.956	2.12576	1.08798	3.51499e-10	1.48982e-08	scaf27	1875742	1886365	-	1614	-	GO:0003824;GO:0003824;GO:0008152;	-	-	-	-	-	101735849
BGIBMGA001219	504.444	329.923	678.966	2.05795	1.04121	4.67575e-10	1.931e-08	scaf1	10226311	10239841	+	1032	-	-	-	-	-	-	-	-
BGIBMGA000081	267.053	155.314	378.792	2.43888	1.28622	4.98171e-10	2.04424e-08	scaf43	2010028	2010387	-	360	-	GO:0005634;GO:0005634;GO:0046982;GO:0046982;	K02326	EC:2.7.7.7	-	-	-	101741556
BGIBMGA011578	501.72	327.079	676.361	2.06788	1.04816	5.27291e-10	2.13652e-08	scaf22	3764285	3765619	+	765	-	GO:0001525;GO:0001525;GO:0016765;GO:0016765;GO:0019408;GO:0019408;GO:1904423;GO:1904423;	K19177	EC:2.5.1.87	-	-	-	101738415
BGIBMGA008284	1089.48	544.66	1634.3	3.00059	1.58525	5.64423e-10	2.27981e-08	scaf94	1451220	1452346	+	1071	-	GO:0003676;GO:0003676;GO:0003723;GO:0003723;	-	-	-	-	-	-
BGIBMGA001157	134.698	63.3748	206.021	3.25083	1.70081	7.19462e-10	2.87005e-08	scaf1	6588713	6595793	+	681	-	GO:0046872;GO:0046872;	-	-	-	-	-	-
BGIBMGA001148	88.0034	33.7793	142.228	4.2105	2.07399	7.99237e-10	3.14929e-08	scaf1	6191216	6191935	+	720	ASH2	GO:0003677;GO:0003677;GO:0006357;GO:0006357;GO:0046983;GO:0046983;	K09067	-	-	-	Achaete-scute-like protein ASH2[Source:UniProtKB/TrEMBL;Acc:A6N867]	100125603
BGIBMGA012953	212.687	116.788	308.586	2.64228	1.40178	8.10251e-10	3.18295e-08	scaf4	2303103	2305431	+	858	-	GO:0016020;GO:0016021;GO:0016021;	-	-	-	-	-	-
BGIBMGA014067	192.666	103.187	282.145	2.7343	1.45117	8.52357e-10	3.32806e-08	scaf251	2977	18451	-	1548	-	-	-	-	-	-	-	-
BGIBMGA006195	353.167	218.704	487.631	2.22964	1.15681	8.78255e-10	3.39829e-08	scaf5	7310042	7315094	+	1119	-	GO:0006270;GO:0006270;GO:0051301;GO:0051301;	-	-	-	-	-	-
BGIBMGA011834	717.178	344.357	1090	3.16532	1.66235	9.52771e-10	3.64286e-08	scaf16	3063466	3068706	+	678	-	GO:0008113;GO:0008113;GO:0055114;GO:0055114;	-	-	-	-	-	-
BGIBMGA005897	4177.34	1161.92	7192.76	6.1904	2.63003	1.00668e-09	3.82628e-08	scaf67	1375584	1378281	+	864	-	GO:0003824;GO:0003824;GO:0006596;GO:0006596;GO:0016740;GO:0016740;	K00797	EC:2.5.1.16	-	-	-	101742094
BGIBMGA002532	411.438	262.406	560.469	2.13588	1.09483	1.03482e-09	3.92165e-08	scaf14	5228298	5236053	+	2562	-	GO:0005515;GO:0016020;GO:0016021;GO:0016021;	-	-	-	-	-	101740249
BGIBMGA013782	1035.71	548.049	1523.37	2.77962	1.47489	1.2553e-09	4.71561e-08	scaf47	566821	567177	+	357	-	-	-	-	-	-	-	101746461
BGIBMGA009414	241.397	34.9972	447.797	12.7952	3.67754	1.28332e-09	4.80684e-08	scaf81	569808	571800	+	324	-	-	-	-	-	-	-	-
BGIBMGA007090	715.897	434.826	996.968	2.2928	1.19711	1.46871e-09	5.41758e-08	scaf21	2664675	2668241	+	915	-	GO:0003729;GO:0003729;GO:0005685;GO:0005685;GO:0006376;GO:0006376;	-	-	-	-	-	-
BGIBMGA008427	373.331	235.46	511.203	2.17108	1.11841	1.4716e-09	5.41758e-08	scaf2	1075212	1075658	+	447	-	-	K12592	-	-	-	-	101746392
BGIBMGA001161	329.824	198.777	460.871	2.31854	1.21321	1.52722e-09	5.59039e-08	scaf1	6865682	6866263	+	360	-	-	-	-	-	-	-	-
BGIBMGA012803	450.805	243.428	658.182	2.70381	1.43499	1.649e-09	6.0191e-08	scaf4	6948732	6950632	-	1695	-	-	-	-	-	-	-	-
BGIBMGA007739	1204.04	716.667	1691.4	2.3601	1.23885	3.44227e-09	1.21185e-07	scaf3	902263	902736	-	474	-	-	K15730	EC:5.3.99.3	-	-	-	101746199
BGIBMGA003129	2298.21	966.021	3630.39	3.75809	1.91	4.21639e-09	1.46833e-07	scaf13	3212931	3222216	+	648	-	-	-	-	-	-	-	-
BGIBMGA000462	1172.8	469.687	1875.91	3.99397	1.99782	6.12573e-09	2.06623e-07	scaf18	4855528	4864623	+	684	-	GO:0005576;GO:0005576;	-	-	-	-	27 kDa glycoprotein [Source:UniProtKB/Swiss-Prot;Acc:Q8T113]	692422
BGIBMGA011066	1494.74	486.476	2503	5.14516	2.36322	6.98793e-09	2.3206e-07	scaf31	684207	684410	+	204	-	-	-	-	-	-	-	101747015
BGIBMGA006021	87.9041	27.5479	148.26	5.38191	2.42812	7.61688e-09	2.50366e-07	scaf5	2336808	2342044	-	594	-	GO:0016020;GO:0016021;GO:0016021;GO:0016021;	-	-	-	-	-	-
BGIBMGA000963	106.81	48.183	165.436	3.4335	1.77968	8.19956e-09	2.66124e-07	scaf1	8175091	8185940	-	2040	-	GO:0016020;GO:0016021;GO:0016021;	-	-	-	-	-	-
BGIBMGA002870	352.834	226.781	478.888	2.11168	1.07839	8.67528e-09	2.79452e-07	scaf30	782490	785396	+	2907	-	GO:0000166;GO:0000723;GO:0000723;GO:0003676;GO:0003676;GO:0003677;GO:0003677;GO:0003677;GO:0004003;GO:0004003;GO:0004003;GO:0004386;GO:0005524;GO:0005524;GO:0005524;GO:0005634;GO:0005634;GO:0005634;GO:0006139;GO:0006139;GO:0006260;GO:0006260;GO:0006281;GO:0006281;GO:0006281;GO:0006310;GO:0006310;GO:0006974;GO:0008026;GO:0008026;GO:0010569;GO:0010569;GO:0016787;GO:0016818;GO:0016818;GO:0032508;GO:…	K11136	EC:3.6.4.12	-	-	-	101736870
BGIBMGA005895	331.143	211.011	451.275	2.13863	1.09669	9.36406e-09	2.99394e-07	scaf67	1304895	1307100	+	513	-	-	-	-	-	-	-	-
BGIBMGA008958	136.23	68.2966	204.164	2.98937	1.57984	9.70922e-09	3.08897e-07	scaf17	1169339	1179920	+	2703	-	GO:0001944;GO:0001944;GO:0005515;GO:0008191;GO:0008191;GO:0060828;GO:0060828;GO:1904684;GO:1904684;	-	-	-	-	-	-
BGIBMGA004023	998.879	661.468	1336.29	2.02019	1.01449	9.84151e-09	3.11705e-07	scaf36	1748630	1750290	-	753	-	-	-	-	-	-	-	101735856
BGIBMGA005966	399.237	262.486	535.987	2.04196	1.02996	1.08894e-08	3.38914e-07	scaf5	6413288	6414769	-	1482	-	GO:0004345;GO:0004345;GO:0004345;GO:0005975;GO:0006006;GO:0006006;GO:0006006;GO:0006098;GO:0006098;GO:0016491;GO:0050661;GO:0050661;GO:0055114;GO:0055114;GO:0055114;	K00036	-	-	-	Glucose-6-phosphate 1-dehydrogenase[Source:UniProtKB/TrEMBL;Acc:H9J8X4]	101746394
BGIBMGA003941	34.5803	0	69.1607	Inf	Inf	1.10693e-08	3.43682e-07	scaf105	388815	389576	-	762	-	-	K00069	EC:1.1.1.141	-	-	-	101735322
BGIBMGA001795	97.4272	42.5531	152.301	3.57909	1.83959	1.12606e-08	3.48779e-07	scaf35	2563377	2569464	+	1152	-	GO:0016020;GO:0016021;GO:0016021;	-	-	-	-	-	105842074
BGIBMGA011581	8033.2	5232.86	10833.5	2.07029	1.04983	1.20927e-08	3.70986e-07	scaf22	4387289	4388301	+	276	SMT3	GO:0005515;GO:0005634;GO:0005634;GO:0016925;GO:0016925;	K12160	-	-	-	SUMO; Small ubiquitin-like modifier protein;Ubiquitin-like protein SMT3[Source:UniProtKB/TrEMBL;Acc:Q2VEW6]	692976
BGIBMGA006905	399.327	237.291	561.363	2.36572	1.24228	2.10058e-08	6.15135e-07	scaf44	1915190	1921244	-	1605	-	GO:0004560;GO:0004560;GO:0005975;GO:0005975;GO:0006004;GO:0006004;	-	-	-	-	-	-
BGIBMGA002138	178.702	100.671	256.732	2.5502	1.35061	2.18235e-08	6.36189e-07	scaf23	3851038	3883630	+	3276	-	GO:0016020;GO:0016021;GO:0016021;	-	-	-	-	-	-
BGIBMGA010701	42.5052	10.5516	74.4588	7.05661	2.81898	2.6931e-08	7.72843e-07	scaf148	270765	282358	+	963	-	GO:0005739;GO:0006811;GO:0006811;GO:0015075;GO:0015075;GO:0016020;GO:0016020;GO:0016020;GO:0016021;GO:0016021;GO:0031966;GO:0031966;GO:0034220;GO:0055085;GO:0055085;	-	-	-	-	-	101736404
BGIBMGA000638	60.6264	21.2099	100.043	4.71681	2.23781	4.19616e-08	1.1594e-06	scaf8	2038062	2044417	+	1389	-	GO:0003677;GO:0003677;GO:0003677;GO:0005634;GO:0005634;GO:0005634;GO:0006355;GO:0006355;GO:0043565;GO:0043565;	-	-	-	-	-	-
BGIBMGA011082	539.57	336.131	743.008	2.21047	1.14435	4.79584e-08	1.30093e-06	scaf31	2569541	2573107	+	3567	-	GO:0002376;GO:0005515;GO:0007165;GO:0007165;GO:0016020;GO:0016021;GO:0016021;GO:0045087;GO:0045087;	-	-	-	-	-	-
BGIBMGA002603	74.1178	29.7555	118.48	3.98179	1.99342	5.79388e-08	1.54564e-06	scaf20	2545898	2546431	-	246	-	-	-	-	-	-	-	-
BGIBMGA007961	282.74	149.684	415.797	2.77783	1.47396	6.75293e-08	1.78302e-06	scaf3	8977825	8979285	+	1461	-	GO:0003676;GO:0003676;GO:0003723;GO:0003723;	-	-	-	-	-	-
BGIBMGA001276	82.2865	35.1988	129.374	3.67553	1.87795	6.84055e-08	1.79879e-06	scaf1	13184825	13200127	+	1377	-	GO:0004497;GO:0004497;GO:0005506;GO:0005506;GO:0016491;GO:0016705;GO:0016705;GO:0020037;GO:0020037;GO:0046872;GO:0055114;GO:0055114;GO:0055114;	K15004	EC:1.14.-.-	-	-	-	101744617
BGIBMGA001324	4093.6	2132.11	6055.08	2.83995	1.50586	7.15889e-08	1.87104e-06	scaf139	325065	333260	+	711	-	-	-	-	-	-	-	692495
BGIBMGA010298	379.128	239.834	518.423	2.1616	1.1121	7.3244e-08	1.91042e-06	scaf127	486589	492604	-	405	-	-	-	-	-	-	-	-
BGIBMGA010771	78.7411	33.406	124.076	3.71419	1.89305	8.14419e-08	2.08624e-06	scaf25	306683	308272	-	1026	-	-	-	-	-	-	-	101744818
BGIBMGA005067	207.991	125.49	290.492	2.31486	1.21092	8.81234e-08	2.23959e-06	scaf32	2139931	2141619	-	789	-	-	-	-	-	-	-	-
BGIBMGA000291	553.632	300.221	807.042	2.68816	1.42662	9.12239e-08	2.30927e-06	scaf18	2818188	2839441	-	852	-	GO:0006629;GO:0006631;GO:0006633;GO:0006633;GO:0016020;GO:0016021;GO:0016021;GO:0016021;GO:0016740;GO:0102336;GO:0102336;GO:0102337;GO:0102337;GO:0102338;GO:0102338;GO:0102756;GO:0102756;	-	-	-	-	-	-
BGIBMGA002754	310.506	203.497	417.515	2.0517	1.03682	9.92085e-08	2.49668e-06	scaf146	159599	163921	-	1503	-	GO:0005524;GO:0005524;	-	-	-	-	-	-
BGIBMGA014109	303.65	196.786	410.515	2.0861	1.06081	1.00197e-07	2.51665e-06	scaf76	1014802	1022009	-	1596	-	GO:0007165;GO:0007165;	-	-	-	-	-	-
BGIBMGA014005	78.474	33.5127	123.435	3.68324	1.88098	1.10181e-07	2.746e-06	scaf29	3823309	3835709	+	1056	-	GO:0005230;GO:0005230;GO:0006811;GO:0006811;GO:0016021;GO:0016021;GO:0034220;	-	-	-	-	-	-
BGIBMGA004695	5418.36	3506.39	7330.33	2.09056	1.06389	1.1179e-07	2.77536e-06	scaf108	177246	177724	-	345	HMGA	GO:0003677;GO:0003677;	K09283	-	-	-	HMGA [Source:UniProtKB/TrEMBL;Acc:A9X4T2]"	100134920
BGIBMGA004613	115.626	49.7742	181.477	3.64602	1.86632	1.40288e-07	3.42999e-06	scaf128	607395	609831	-	762	-	GO:0000166;GO:0005524;GO:0005524;	-	-	-	-	-	-
BGIBMGA013510	1522.32	822.584	2222.06	2.70131	1.43366	1.62287e-07	3.91585e-06	scaf101	165625	174329	+	1128	BMRNRS	GO:0009263;GO:0009263;GO:0016491;GO:0016491;GO:0055114;GO:0055114;	K10808	EC:1.17.4.1	-	-	Ribonucleoside diphosphate reductase small subunit[Source:UniProtKB/TrEMBL;Acc:H9JVE7]	100873153
BGIBMGA003954	147.864	82.792	212.935	2.57193	1.36285	1.76089e-07	4.20168e-06	scaf105	198729	200341	+	381	-	GO:0000045;GO:0000045;GO:0005737;GO:0005737;GO:0005737;GO:0006914;	K08336	-	-	-	Autophagy related protein Atg12-like protein[Source:UniProtKB/TrEMBL;Acc:B7TYK6]	100216353
BGIBMGA001550	317.671	210.626	424.715	2.01644	1.01181	1.77692e-07	4.23209e-06	scaf7	4905624	4911209	+	1017	CDK7	GO:0004672;GO:0004672;GO:0005524;GO:0005524;GO:0005675;GO:0005675;GO:0006468;GO:0006468;GO:0008353;GO:0008353;GO:0016301;GO:0016310;GO:0070985;GO:0070985;	K02202	-	-	-	Cyclin dependent kinase 7[Source:UniProtKB/TrEMBL;Acc:D2IGZ5]	100379321
BGIBMGA003319	413.533	259.997	567.069	2.18106	1.12503	1.91151e-07	4.50271e-06	scaf42	2655007	2669966	-	1176	-	GO:0003824;GO:0003824;GO:0004069;GO:0004069;GO:0006520;GO:0006520;GO:0008483;GO:0008483;GO:0008483;GO:0009058;GO:0009058;GO:0016740;GO:0030170;GO:0030170;	-	-	-	-	Aspartate aminotransferase[Source:UniProtKB/TrEMBL;Acc:H9J1D2]	-
BGIBMGA014238	239.759	151.222	328.297	2.17096	1.11833	1.9606e-07	4.59316e-06	scaf80	1040292	1054444	-	1902	-	GO:0016020;GO:0016020;GO:0016020;GO:0016021;GO:0016021;GO:0022857;GO:0022857;GO:0055085;GO:0055085;	-	-	-	-	-	-
BGIBMGA008620	201.915	120.583	283.247	2.34897	1.23203	1.97768e-07	4.62476e-06	scaf136	105740	106123	-	384	-	GO:0005744;GO:0005744;GO:0030150;GO:0030150;	K17805	-	-	-	Mitochondria-associated granulocyte macrophage CSFsignaling molecule [Source:UniProtKB/TrEMBL;Acc:Q2F5Q0]	692951
BGIBMGA000868	165.503	95.6578	235.348	2.46031	1.29884	2.05398e-07	4.76691e-06	scaf1	13260902	13263113	-	441	-	GO:0004497;GO:0004497;GO:0005506;GO:0005506;GO:0016491;GO:0016705;GO:0016705;GO:0020037;GO:0020037;GO:0046872;GO:0055114;GO:0055114;GO:0055114;	-	-	-	-	-	-
BGIBMGA001130	139.352	76.6139	202.09	2.63777	1.39932	2.17948e-07	5.03273e-06	scaf1	4638260	4660819	+	1062	-	GO:0006812;GO:0006812;GO:0008324;GO:0008324;GO:0016020;GO:0016021;GO:0016021;GO:0016021;GO:0055085;GO:0055085;GO:0098655;	-	-	-	-	-	-
BGIBMGA005177	4799.48	2975.08	6623.87	2.22645	1.15475	2.34493e-07	5.38581e-06	scaf290	26603	36938	-	1953	-	GO:0003676;GO:0003676;GO:0003723;GO:0003723;	-	-	-	-	-	-
BGIBMGA007541	1026.06	618.841	1433.28	2.31608	1.21168	2.41595e-07	5.52922e-06	scaf66	301158	302929	-	990	-	-	-	-	-	-	-	-
BGIBMGA000298	80.5459	36.0402	125.052	3.46978	1.79485	2.45267e-07	5.60332e-06	scaf18	1870033	1882127	-	1071	-	GO:0005576;GO:0005576;GO:0006030;GO:0006030;GO:0008061;GO:0008061;	-	-	-	-	-	-
BGIBMGA004268	93.0673	44.0376	142.097	3.22672	1.69007	2.49046e-07	5.67957e-06	scaf79	1470860	1486154	-	2646	-	GO:0003676;GO:0003676;	K11268	EC:2.3.1.-	-	-	-	101742011
BGIBMGA006109	834.007	546.153	1121.86	2.05412	1.03852	2.61144e-07	5.924e-06	scaf5	1316675	1319087	+	576	-	GO:0005634;GO:0005634;GO:0005634;	-	-	-	-	-	-
BGIBMGA006892	91.684	44.1976	139.17	3.14882	1.65481	3.66218e-07	8.13572e-06	scaf44	3181417	3197080	-	963	-	GO:0016020;GO:0016020;GO:0016757;GO:0016757;	-	-	-	-	-	-
BGIBMGA013776	192.532	116.773	268.291	2.29755	1.2001	3.75932e-07	8.33714e-06	scaf47	266394	288604	+	2202	-	GO:0016020;GO:0016021;GO:0016021;	-	-	-	-	-	-
BGIBMGA001601	123.649	67.1586	180.139	2.68228	1.42346	4.83135e-07	1.04978e-05	scaf7	8241880	8244851	+	948	-	GO:0016020;GO:0016021;GO:0016021;GO:0016021;GO:0022857;GO:0022857;GO:0055085;GO:0055085;	-	-	-	-	-	-
BGIBMGA011373	116.84	61.677	172.004	2.78878	1.47964	4.87683e-07	1.05788e-05	scaf12	3757035	3785305	+	2979	-	GO:0004672;GO:0004672;GO:0005524;GO:0005524;GO:0006468;GO:0006468;	-	-	-	-	-	-
BGIBMGA003398	793.739	491.374	1096.11	2.2307	1.15749	4.90348e-07	1.06187e-05	scaf42	1034768	1036378	+	441	-	GO:0005634;GO:0005634;	K12877	-	-	-	Mago nashi; Mago-nashi-like protein[Source:UniProtKB/TrEMBL;Acc:Q5I200]	733069
BGIBMGA009377	80.0872	30.1021	130.072	4.32103	2.11138	5.19751e-07	1.12177e-05	scaf53	1971619	1972716	+	1098	-	-	-	-	-	-	-	-
BGIBMGA013204	186.324	113.217	259.43	2.29144	1.19625	5.45549e-07	1.16574e-05	scaf39	158652	162235	-	1755	-	GO:0003723;GO:0003723;	-	-	-	-	-	-
BGIBMGA006393	206.542	129.384	283.7	2.1927	1.13271	5.90053e-07	1.24433e-05	scaf11	2679608	2681040	-	1344	-	GO:0003677;GO:0003677;GO:0003677;GO:0005634;GO:0005634;GO:0006355;GO:0006355;GO:0043565;GO:0043565;	-	-	-	-	-	-
BGIBMGA002541	22.0565	3.02237	41.0907	13.5955	3.76506	8.22255e-07	1.66584e-05	scaf14	5496340	5504708	+	1146	-	GO:0004620;GO:0004620;GO:0016788;GO:0016788;	-	-	-	-	-	-
BGIBMGA003291	210.612	133.156	288.067	2.16338	1.11329	9.4038e-07	1.87277e-05	scaf73	1888199	1889740	+	525	-	-	-	-	-	-	-	-
BGIBMGA011897	487.905	294.358	681.451	2.31505	1.21104	1.05293e-06	2.08083e-05	scaf59	2001517	2002739	-	492	-	GO:0006974;GO:0006974;GO:0051726;GO:0051726;	-	-	-	-	-	-
BGIBMGA007572	171.499	62.2785	280.72	4.5075	2.17233	1.09052e-06	2.14524e-05	scaf66	858855	869555	+	1362	-	GO:0016020;GO:0016021;GO:0016021;GO:0016021;GO:0055085;GO:0055085;	-	-	-	-	-	-
BGIBMGA005922	215.616	136.247	294.986	2.16509	1.11443	1.12429e-06	2.19324e-05	scaf5	8479497	8481573	-	360	-	GO:0005856;GO:0005885;GO:0005885;GO:0015629;GO:0015629;GO:0030833;GO:0030833;GO:0034314;GO:0034314;	-	-	-	-	Actin-related protein 2/3 complex subunit 5[Source:UniProtKB/TrEMBL;Acc:H9J8T0]	-
BGIBMGA013623	264.578	176.189	352.967	2.00334	1.00241	1.12513e-06	2.19324e-05	scaf78	548545	551042	+	321	-	GO:0006368;GO:0006368;GO:0030891;GO:0030891;GO:0070449;GO:0070449;	-	-	-	-	-	-
BGIBMGA006359	398.666	260.116	537.216	2.0653	1.04635	1.15706e-06	2.25208e-05	scaf11	5879590	5884457	-	2433	-	GO:0005515;GO:0006364;GO:0006364;GO:0032040;GO:0032040;	-	-	-	-	-	-
BGIBMGA013237	61.3136	1.01634	121.611	119.655	6.90274	1.18985e-06	2.3124e-05	scaf39	1611522	1613971	+	1572	-	GO:0004497;GO:0004497;GO:0005506;GO:0005506;GO:0016020;GO:0016021;GO:0016021;GO:0016491;GO:0016705;GO:0016705;GO:0020037;GO:0020037;GO:0046872;GO:0055114;GO:0055114;GO:0055114;	-	-	-	-	-	-
BGIBMGA007919	187.524	116.879	258.169	2.20885	1.14329	1.19536e-06	2.31961e-05	scaf3	6469203	6473984	+	759	-	GO:0016491;GO:0016491;GO:0055114;	-	-	-	-	-	-
BGIBMGA014150	186.01	115.81	256.21	2.21233	1.14557	1.2485e-06	2.40103e-05	scaf99	884115	901868	-	3273	-	GO:0000049;GO:0000049;GO:0000166;GO:0000166;GO:0000166;GO:0002161;GO:0002161;GO:0004553;GO:0004553;GO:0004812;GO:0004812;GO:0004812;GO:0004822;GO:0004822;GO:0005524;GO:0005524;GO:0005524;GO:0005737;GO:0005737;GO:0005975;GO:0005975;GO:0006412;GO:0006418;GO:0006418;GO:0006428;GO:0006428;GO:0016874;GO:0106074;	-	-	-	-	-	-
BGIBMGA009155	109.669	58.7346	160.603	2.73439	1.45122	1.26456e-06	2.42109e-05	scaf96	1000760	1001269	+	510	-	-	K03871	-	-	-	-	101739221
BGIBMGA012032	715.819	379.084	1052.55	2.77657	1.4733	1.49396e-06	2.78578e-05	scaf24	3749419	3749730	-	312	-	GO:0005524;GO:0005524;GO:0005737;GO:0005737;GO:0006457;GO:0006457;	K04078	-	-	-	-	101745352
BGIBMGA011307	40.8509	13.2391	68.4627	5.17124	2.37051	1.72658e-06	3.16008e-05	scaf12	560195	560470	+	183	-	-	-	-	-	-	-	-
BGIBMGA007518	1317.73	781.571	1853.89	2.372	1.2461	1.93743e-06	3.50614e-05	scaf66	1008988	1010343	-	1356	-	GO:0003676;GO:0003676;GO:0003723;GO:0003723;	-	-	-	-	-	-
BGIBMGA014618	88.9921	44.814	133.17	2.97162	1.57125	2.32336e-06	4.12917e-05	scaf624	6671	8814	-	1161	-	GO:0000166;GO:0005524;GO:0005524;	-	-	-	-	-	-
BGIBMGA002350	592.981	372.986	812.977	2.17964	1.12409	2.52034e-06	4.46693e-05	scaf337	13927	17080	+	759	-	GO:0000166;GO:0000278;GO:0004672;GO:0004672;GO:0004674;GO:0004674;GO:0004674;GO:0005524;GO:0005524;GO:0005524;GO:0006468;GO:0006468;GO:0007094;GO:0007094;GO:0031577;GO:0032133;GO:0032133;GO:0032467;GO:0032467;GO:0043988;GO:0043988;	-	-	-	-	-	-
BGIBMGA010918	460.448	306.927	613.968	2.00037	1.00027	2.54012e-06	4.49324e-05	scaf68	1318446	1325790	-	762	-	GO:0006629;GO:0006631;GO:0006633;GO:0006633;GO:0016020;GO:0016021;GO:0016021;GO:0016021;GO:0016740;GO:0102336;GO:0102336;GO:0102337;GO:0102337;GO:0102338;GO:0102338;GO:0102756;GO:0102756;	-	-	-	-	-	-
BGIBMGA001789	155.488	93.96	217.017	2.30967	1.20769	2.65008e-06	4.65209e-05	scaf35	2325184	2338230	+	2283	-	GO:0008270;GO:0008270;GO:0046872;	-	-	-	-	-	-
BGIBMGA011920	2049.97	1171.84	2928.11	2.49873	1.3212	2.77766e-06	4.8365e-05	scaf59	941566	947300	-	1140	-	GO:0003676;GO:0003676;GO:0003723;GO:0003723;GO:0005730;GO:0005730;GO:0008270;GO:0008270;GO:0042254;GO:0042254;GO:0046872;GO:0046872;GO:0046872;GO:1990904;GO:1990904;	-	-	-	-	-	-
BGIBMGA001457	739.701	451.005	1028.4	2.28024	1.18918	2.82515e-06	4.91257e-05	scaf7	1991453	1997168	-	1911	-	-	-	-	-	-	-	-
BGIBMGA006485	54.6307	21.3165	87.9448	4.12566	2.04462	2.88765e-06	5.00099e-05	scaf11	2459966	2462279	+	555	-	GO:0003677;GO:0003677;GO:0003700;GO:0003700;GO:0006355;GO:0006355;	-	-	-	-	-	-
BGIBMGA010479	74.3277	35.412	113.243	3.19787	1.67711	3.17871e-06	5.4465e-05	scaf6	416867	417544	-	378	-	-	-	-	-	-	-	-
BGIBMGA000419	227.804	119.22	336.387	2.82156	1.49649	3.2508e-06	5.55524e-05	scaf18	2737892	2745506	+	972	-	GO:0003857;GO:0003857;GO:0006631;GO:0006631;GO:0016491;GO:0016491;GO:0055114;GO:0055114;GO:0070403;GO:0070403;	K13247	EC:1.1.1.45	-	-	-	101740023
BGIBMGA013646	18.032	2.00603	34.0579	16.9778	4.08558	3.39212e-06	5.75098e-05	scaf78	1722325	1725658	+	582	-	GO:0016020;GO:0016021;GO:0016021;GO:0016491;GO:0016491;GO:0055114;	-	-	-	-	-	-
BGIBMGA012960	188.987	120.732	257.242	2.1307	1.09133	3.56369e-06	6.00237e-05	scaf4	2677906	2688171	+	411	-	GO:0005548;GO:0005548;GO:0005622;GO:0005622;GO:0015914;GO:0015914;	-	-	-	-	-	-
BGIBMGA002518	188.732	120.225	257.238	2.13964	1.09737	3.80723e-06	6.38753e-05	scaf14	3838683	3858467	+	1944	-	GO:0004222;GO:0004222;GO:0004222;GO:0006508;GO:0006508;GO:0006508;GO:0008233;GO:0008237;GO:0008237;GO:0008237;GO:0008270;GO:0008270;GO:0016787;GO:0046872;	-	-	-	-	-	-
BGIBMGA012995	124.465	71.7871	177.143	2.46761	1.30311	3.92343e-06	6.54913e-05	scaf4	4231647	4238932	+	1122	-	GO:0004067;GO:0004067;	-	-	-	-	-	-
BGIBMGA009232	47.8038	18.2142	77.3935	4.24908	2.08715	4.03632e-06	6.70206e-05	scaf38	1762143	1767186	-	1092	-	GO:0003824;GO:0003824;GO:0004034;GO:0004034;GO:0005975;GO:0005975;GO:0005975;GO:0016853;GO:0016853;GO:0016853;GO:0019318;GO:0019318;GO:0019318;GO:0030246;GO:0030246;	K01785	EC:5.1.3.3	-	-	Aldose 1-epimerase[Source:UniProtKB/TrEMBL;Acc:H9JI83]	101741280
BGIBMGA004889	220.129	145.672	294.586	2.02226	1.01597	4.32536e-06	7.13602e-05	scaf144	70340	75335	-	1026	-	GO:0006812;GO:0006812;GO:0008324;GO:0008324;GO:0016020;GO:0016021;GO:0016021;GO:0016021;GO:0055085;GO:0055085;GO:0098655;	K14692	-	-	-	-	101741721
BGIBMGA014607	182.201	117.001	247.401	2.11452	1.08033	5.27909e-06	8.49203e-05	scaf583	4565	5031	+	270	-	GO:0005739;GO:0005739;GO:0005758;GO:0005758;GO:0015031;GO:0015031;GO:0046872;GO:0046872;GO:0072321;GO:0072321;	K17780	-	-	-	Translocase of inner mitochondrial membrane 8homolog b [Source:UniProtKB/TrEMBL;Acc:Q2F5V6]	692908
BGIBMGA012948	62.5695	28.3776	96.7613	3.40977	1.76968	5.33476e-06	8.54955e-05	scaf4	1392963	1404127	+	1485	-	GO:0000166;GO:0000166;GO:0009166;GO:0009166;GO:0016787;GO:0016787;GO:0016787;	-	-	-	-	-	-
BGIBMGA002683	1548.97	1019.14	2078.8	2.03975	1.02839	5.35248e-06	8.56231e-05	scaf20	2410300	2414905	+	963	-	GO:0016310;GO:0016310;GO:0016772;GO:0016772;	-	-	-	-	-	-
BGIBMGA002238	40.5941	12.6643	68.5239	5.4108	2.43584	5.69933e-06	9.0327e-05	scaf34	3939186	3940091	-	906	-	GO:0003676;GO:0003676;	K12379	-	-	-	-	101735539
BGIBMGA003128	233.909	104.283	363.534	3.48602	1.80158	6.02134e-06	9.48471e-05	scaf13	3202263	3203047	+	234	-	-	-	-	-	-	-	-
BGIBMGA004661	1194.76	747.452	1642.08	2.1969	1.13547	6.52726e-06	0.000101549	scaf135	175300	175587	+	288	-	GO:0000398;GO:0000398;GO:0005681;GO:0005681;	-	-	-	-	-	-
BGIBMGA013110	192.573	125.36	259.785	2.07231	1.05124	6.69174e-06	0.000103634	scaf219	63911	70371	-	840	-	-	-	-	-	-	-	101743179
BGIBMGA003547	41.9992	6.53958	77.4588	11.8446	3.56616	7.35767e-06	0.000112861	scaf9	2353213	2353965	-	753	-	GO:0003677;GO:0003700;GO:0003700;GO:0005634;GO:0005634;GO:0006355;GO:0006355;GO:0043565;GO:0043565;	K09411	-	-	-	-	101741019
BGIBMGA011391	119.966	69.941	169.991	2.4305	1.28125	8.10213e-06	0.000123692	scaf12	4889887	4905400	+	1965	-	GO:0016020;GO:0016021;GO:0016021;GO:0016021;GO:0055085;GO:0055085;	-	-	-	-	-	-
BGIBMGA002542	39.3353	13.8406	64.83	4.68404	2.22775	8.12373e-06	0.000123729	scaf14	5535237	5544013	+	1350	-	GO:0000166;GO:0003924;GO:0003924;GO:0003924;GO:0005200;GO:0005200;GO:0005525;GO:0005525;GO:0005525;GO:0005737;GO:0005737;GO:0005856;GO:0005874;GO:0005874;GO:0005874;GO:0007010;GO:0007017;GO:0007017;	-	-	-	-	-	-
BGIBMGA014266	23.8126	1.97936	45.6459	23.0609	4.52738	8.37563e-06	0.000127414	scaf80	1007418	1014870	+	1710	-	GO:0016020;GO:0016020;GO:0016020;GO:0016021;GO:0016021;GO:0022857;GO:0022857;GO:0055085;GO:0055085;	-	-	-	-	-	-
BGIBMGA008875	94.0271	51.4186	136.636	2.65732	1.40997	8.72387e-06	0.000132088	scaf17	4066733	4075129	-	1455	-	-	-	-	-	-	-	-
BGIBMGA005972	158.679	99.9898	217.368	2.1739	1.12029	8.79009e-06	0.000132935	scaf5	5940625	5947929	-	1566	-	GO:0004672;GO:0004672;GO:0004713;GO:0004713;GO:0005524;GO:0005524;GO:0006468;GO:0006468;GO:0016020;GO:0016021;GO:0016021;GO:0018108;	-	-	-	-	-	-
BGIBMGA013605	995.248	629.176	1361.32	2.16365	1.11347	9.11351e-06	0.000137022	scaf78	99520	102832	-	963	-	GO:0003723;GO:0003723;GO:0003723;GO:0003743;GO:0003743;GO:0003743;GO:0005737;GO:0005737;GO:0006412;GO:0006413;GO:0006413;GO:0006413;	-	-	-	-	-	-
BGIBMGA006056	363.818	221.139	506.497	2.29039	1.1956	9.86118e-06	0.000146553	scaf5	911589	912287	-	699	-	GO:0001522;GO:0001522;GO:0003723;GO:0003723;GO:0005634;GO:0005730;GO:0006364;GO:0006364;GO:0031429;GO:0031429;GO:0042254;GO:0042254;GO:0042254;	K11128	-	-	-	-	101746301
BGIBMGA006486	116.213	68.4149	164.012	2.39731	1.26142	9.93712e-06	0.000147511	scaf11	2477649	2478269	+	621	-	GO:0003677;GO:0003677;GO:0003677;GO:0005634;GO:0005634;GO:0006355;GO:0006355;GO:0043565;GO:0043565;	-	-	-	-	-	-
BGIBMGA003373	29.1924	8.13075	50.2542	6.18076	2.62778	1.02531e-05	0.000151331	scaf42	306837	307933	-	864	-	-	-	-	-	-	-	-
BGIBMGA006322	65.277	29.5273	101.027	3.42147	1.77462	1.0338e-05	0.000152235	scaf49	1670887	1675983	+	816	-	GO:0004383;GO:0004383;GO:0005622;GO:0005622;GO:0006182;GO:0006182;GO:0009190;GO:0009190;GO:0016849;GO:0016849;GO:0035556;GO:0035556;	-	-	-	-	-	-
BGIBMGA004033	17.9326	2.55419	33.3109	13.0417	3.70506	1.08127e-05	0.000158681	scaf36	853436	853871	-	363	-	-	-	-	-	-	-	-
BGIBMGA010948	126.503	32.3897	220.617	6.81134	2.76794	1.19978e-05	0.00017331	scaf68	1954424	1958837	+	2187	-	-	-	-	-	-	-	100327241
BGIBMGA010207	199.786	130.91	268.663	2.05227	1.03722	1.22777e-05	0.000176956	scaf15	1812415	1815570	+	642	-	GO:0016429;GO:0016429;GO:0030488;GO:0030488;GO:0031515;GO:0031515;	-	-	-	-	-	-
BGIBMGA012045	1351.37	743.418	1959.31	2.63554	1.3981	1.25871e-05	0.000180808	scaf24	3002575	3003271	-	267	-	GO:0000387;GO:0000387;GO:0000398;GO:0000398;GO:0003723;GO:0003723;GO:0005634;GO:0005681;GO:0005681;GO:0005681;GO:0005732;GO:0005732;GO:0006397;GO:0008380;	K11098	-	-	-	Small nuclear ribonucleoprotein protein F[Source:UniProtKB/TrEMBL;Acc:Q1HPQ7]	100101178
BGIBMGA010052	13.9064	1.01634	26.7965	26.3656	4.72058	1.2603e-05	0.000180835	scaf45	286595	289123	+	477	-	GO:0003677;GO:0003677;GO:0003677;GO:0005634;GO:0005634;	-	-	-	-	-	-
BGIBMGA002767	44.2596	17.0645	71.4546	4.18731	2.06602	1.27572e-05	0.000182438	scaf146	282083	306627	+	1218	-	GO:0004930;GO:0004930;GO:0004930;GO:0007165;GO:0007186;GO:0007186;GO:0007186;GO:0016020;GO:0016021;GO:0016021;GO:0016021;GO:0016500;GO:0016500;	-	-	-	-	-	-
BGIBMGA000639	27.9388	7.58258	48.2949	6.36919	2.67111	1.27954e-05	0.000182781	scaf8	2214105	2215018	+	810	-	GO:0003677;GO:0003677;GO:0003677;GO:0005634;GO:0005634;GO:0005634;GO:0006355;GO:0006355;GO:0043565;GO:0043565;	-	-	-	-	-	-
BGIBMGA014193	372.49	221.071	523.909	2.36987	1.24481	1.28931e-05	0.000183769	scaf99	1188671	1190266	+	1596	-	GO:0006479;GO:0006479;GO:0008168;GO:0008168;GO:0008168;GO:0016740;GO:0032259;	K05931	EC:2.1.1.319	-	-	-	101737538
BGIBMGA006638	143.049	89.13	196.968	2.20989	1.14397	1.2916e-05	0.000183893	scaf10	2759256	2759723	-	186	-	GO:0000166;GO:0000166;GO:0003824;GO:0003824;GO:0005666;GO:0005666;GO:0006352;GO:0006352;GO:0006384;GO:0006384;GO:0030880;GO:0030880;GO:0044237;GO:0044237;	-	-	-	-	-	-
BGIBMGA007822	757.237	409.593	1104.88	2.69751	1.43163	1.35274e-05	0.00019175	scaf3	2269766	2271640	+	807	-	GO:0003676;GO:0003676;GO:0003723;GO:0003723;	-	-	-	-	-	-
BGIBMGA013037	177.687	115.931	239.442	2.06538	1.0464	1.36355e-05	0.000193059	scaf4	5864634	5870610	+	708	-	-	-	-	-	-	-	-
BGIBMGA007586	1888.89	1239.79	2538	2.04712	1.03359	1.3932e-05	0.000195975	scaf66	1438521	1444509	+	1308	-	GO:0000287;GO:0000287;GO:0004450;GO:0004450;GO:0004450;GO:0006099;GO:0006099;GO:0006102;GO:0006102;GO:0016491;GO:0016616;GO:0016616;GO:0046872;GO:0051287;GO:0051287;GO:0055114;GO:0055114;GO:0055114;	K00031	EC:1.1.1.42	-	-	Isocitrate dehydrogenase [NADP][Source:UniProtKB/TrEMBL;Acc:Q1HQ47]	100101164
BGIBMGA012333	297.37	144.241	450.5	3.12325	1.64305	1.57506e-05	0.000218268	scaf26	2209629	2218250	+	918	-	-	-	-	-	-	-	-
BGIBMGA001796	152.133	96.8608	207.404	2.14126	1.09846	1.69655e-05	0.00023206	scaf35	2654528	2656208	+	819	-	-	-	-	-	-	-	101740622
BGIBMGA003032	2563	1702.45	3423.56	2.01096	1.00788	1.78681e-05	0.000242348	scaf13	3257634	3268869	-	906	-	-	-	-	-	-	-	-
BGIBMGA008227	63.3244	30.357	96.2919	3.17198	1.66539	1.80474e-05	0.000244213	scaf121	10588	13484	+	429	-	GO:0007155;GO:0007155;GO:0016020;GO:0016021;GO:0016021;GO:0016021;GO:0042246;GO:0042246;	-	-	-	-	-	-
BGIBMGA007231	190.712	121.401	260.022	2.14184	1.09885	1.82835e-05	0.000246169	scaf131	160142	162041	-	636	-	-	-	-	-	-	-	101745476
BGIBMGA006075	188.24	124.755	251.724	2.01774	1.01274	1.95282e-05	0.000261288	scaf5	427312	431617	-	885	-	GO:0016020;GO:0016021;GO:0016021;GO:0022857;GO:0022857;GO:0055085;GO:0055085;	K15106	-	-	-	-	101743508
BGIBMGA007342	16.0156	2.00603	30.0251	14.9675	3.90376	2.06828e-05	0.000275024	scaf55	1871788	1888233	-	1791	-	GO:0003676;GO:0003676;GO:0003723;GO:0003723;GO:0005515;	-	-	-	-	-	-
BGIBMGA007950	3966.93	2476.67	5457.19	2.20344	1.13976	2.21466e-05	0.000290544	scaf3	8362275	8364610	+	1968	HSP70	GO:0000166;GO:0005524;GO:0005524;	-	-	-	-	Heat shock protein 70-3[Source:UniProtKB/TrEMBL;Acc:F8UN44]	-
BGIBMGA014590	32.5431	10.6849	54.4012	5.09139	2.34806	2.23096e-05	0.000292074	BABH01043539	2250	3138	-	567	-	-	-	-	-	-	-	-
BGIBMGA009874	48.2786	20.6617	75.8955	3.67324	1.87705	2.57474e-05	0.00033242	scaf51	433778	453764	+	1677	-	GO:0016787;GO:0016787;	-	-	-	-	-	-
BGIBMGA000601	385.259	246.731	523.787	2.1229	1.08604	2.79543e-05	0.000357688	scaf8	529573	545423	-	1434	-	GO:0000166;GO:0004672;GO:0004672;GO:0004674;GO:0004675;GO:0004675;GO:0005524;GO:0005524;GO:0005524;GO:0006468;GO:0006468;GO:0007178;GO:0007178;GO:0016020;GO:0016020;GO:0016020;GO:0016021;GO:0016021;GO:0016301;GO:0016310;GO:0016740;GO:0046872;GO:0046872;	-	-	-	-	-	-
BGIBMGA012199	146.289	48.6778	243.899	5.01048	2.32495	3.19879e-05	0.000405674	scaf75	1361831	1394203	+	3402	-	-	-	-	-	-	-	-
BGIBMGA012630	100.648	57.3983	143.897	2.50699	1.32596	3.32058e-05	0.000419467	scaf100	1341021	1342369	+	1155	-	-	-	-	-	-	-	-
BGIBMGA004042	2457.98	1398.03	3517.93	2.51635	1.33133	3.80178e-05	0.000468765	scaf36	379526	380653	-	360	CSP6	-	-	-	-	-	Antennal-specific protein 3c; Chemosensory protein6; Chemosensory protein7[Source:UniProtKB/TrEMBL;Acc:Q3LB94]	692895
BGIBMGA000896	976.319	573.797	1378.84	2.40301	1.26485	3.885e-05	0.000476292	scaf1	11104273	11114597	-	969	-	GO:0006812;GO:0006812;GO:0008324;GO:0008324;GO:0016020;GO:0016021;GO:0016021;GO:0016021;GO:0055085;GO:0055085;GO:0098655;	-	-	-	-	-	-
BGIBMGA005869	150.554	97.7972	203.311	2.0789	1.05582	3.93944e-05	0.000481134	scaf125	444667	445014	+	348	-	GO:0000811;GO:0000811;GO:0006260;GO:0006260;	-	-	-	-	-	-
BGIBMGA009763	1202.63	789.1	1616.17	2.04811	1.03429	5.02538e-05	0.000597894	scaf27	2772166	2772887	+	195	-	-	-	-	-	-	-	101736864
BGIBMGA006308	96.541	56.6219	136.46	2.41002	1.26905	5.46857e-05	0.000644671	scaf49	1139807	1172552	+	3645	-	GO:0005515;	-	-	-	-	-	-
BGIBMGA007731	1321.46	527.9	2115.03	4.0065	2.00234	5.51116e-05	0.000648505	scaf3	1155833	1159849	-	915	-	-	-	-	-	-	-	-
BGIBMGA007838	119.241	4.53355	233.948	51.6037	5.6894	5.70826e-05	0.000668644	scaf3	3068619	3075477	+	621	-	GO:0003841;GO:0003841;GO:0003841;GO:0006629;GO:0008654;GO:0008654;GO:0008654;GO:0016020;GO:0016020;GO:0016020;GO:0016021;GO:0016021;GO:0016740;GO:0016746;GO:0016746;GO:0016746;	-	-	-	-	-	-
BGIBMGA003840	1952.39	1253.24	2651.54	2.11575	1.08117	5.77991e-05	0.000675809	scaf107	1047811	1048191	+	381	-	GO:0000387;GO:0000387;GO:0006396;GO:0006396;	-	-	-	-	-	-
BGIBMGA006394	56.273	27.2013	85.3447	3.13752	1.64963	5.94618e-05	0.00069139	scaf11	2628103	2637204	-	819	-	GO:0003677;GO:0003677;GO:0003700;GO:0003700;GO:0006355;GO:0006355;	-	-	-	-	-	-
BGIBMGA009227	378.98	207.417	550.543	2.65428	1.40832	6.12598e-05	0.000707922	scaf38	1912056	1912349	-	294	-	-	-	-	-	-	-	-
BGIBMGA004001	129.441	82.6053	176.277	2.13397	1.09354	7.12153e-05	0.000810608	scaf36	2925047	2926417	-	1371	HMG-S_BM	GO:0003824;GO:0003824;GO:0004421;GO:0004421;GO:0004421;GO:0006629;GO:0006694;GO:0008202;GO:0008299;GO:0008299;GO:0016126;GO:0016126;GO:0016740;GO:0016746;	K01641	EC:2.3.3.10	-	-	3-hydroxy-3-methylglutaryl-CoA synthase[Source:UniProtKB/TrEMBL;Acc:A5A798]	100101203
BGIBMGA004494	146.488	96.5793	196.396	2.03352	1.02398	7.32015e-05	0.000826645	scaf37	3147484	3148131	+	648	-	GO:0032981;GO:0032981;	K18161	-	-	-	-	101740353
BGIBMGA002090	33.1423	12.1161	54.1685	4.47078	2.16053	7.52427e-05	0.000845921	scaf23	1383448	1385428	+	693	-	GO:0003676;GO:0003676;	-	-	-	-	-	-
BGIBMGA001938	139.335	72.2937	206.376	2.85469	1.51333	7.7313e-05	0.000866242	scaf28	2046256	2050259	+	804	-	GO:0006479;GO:0006479;GO:0008168;GO:0008168;GO:0008168;GO:0016740;GO:0032259;	-	-	-	-	-	-
BGIBMGA003814	114.32	71.0374	157.603	2.2186	1.14965	7.91253e-05	0.000884241	scaf107	729279	737871	-	900	-	GO:0006629;GO:0006629;GO:0008081;GO:0008081;GO:0008889;GO:0008889;	-	-	-	-	-	-
BGIBMGA006943	71.0549	38.781	103.329	2.66442	1.41382	8.03566e-05	0.000896446	scaf44	961193	962287	+	1095	-	GO:0003676;GO:0003676;	-	-	-	-	-	-
BGIBMGA000991	831.144	550.553	1111.73	2.0193	1.01386	8.20399e-05	0.000913643	scaf1	6804421	6811604	-	1476	-	GO:0004812;GO:0004812;GO:0005524;GO:0005524;GO:0005737;GO:0005737;GO:0006418;GO:0006418;	-	-	-	-	-	-
BGIBMGA013485	115.114	57.2768	172.951	3.01956	1.59434	8.283e-05	0.000919573	scaf101	831864	853742	-	1989	-	GO:0005215;GO:0005215;GO:0005515;GO:0005886;GO:0005886;GO:0006811;GO:0006811;GO:0016020;GO:0016020;GO:0016020;GO:0016021;GO:0016021;GO:0055085;GO:0055085;	-	-	-	-	-	-
BGIBMGA014123	148.093	97.6105	198.576	2.03437	1.02458	8.67965e-05	0.000959662	scaf76	234745	235752	+	1008	-	GO:0016020;GO:0016021;GO:0016021;GO:0055085;GO:0055085;	K15278	-	-	-	-	101745518
BGIBMGA012942	77.6115	43.5961	111.627	2.56048	1.35641	8.70897e-05	0.000961569	scaf4	1222649	1229435	+	414	-	GO:0008289;GO:0008289;	-	-	-	-	-	101743601
BGIBMGA010738	173.629	89.1332	258.124	2.89594	1.53403	8.90019e-05	0.000977655	scaf25	2345886	2347933	-	1023	-	GO:0016020;GO:0016021;GO:0016021;	-	-	-	-	-	101737271
BGIBMGA003004	4174.39	2454.18	5894.61	2.40187	1.26416	8.9679e-05	0.000983416	scaf13	4326807	4327346	-	540	-	-	-	-	-	-	-	-
BGIBMGA011324	450.215	296.136	604.295	2.0406	1.02899	9.16877e-05	0.00100203	scaf12	1594228	1597386	+	906	-	GO:0003676;GO:0003676;GO:0003677;GO:0003677;	-	-	-	-	-	-
BGIBMGA003117	281.308	182.477	380.139	2.08322	1.05881	9.83183e-05	0.00106636	scaf13	2794788	2798345	+	633	-	GO:0000776;GO:0000776;GO:0034508;GO:0034508;	-	-	-	-	-	-
BGIBMGA013971	145.679	96.8608	194.498	2.00802	1.00577	0.000100699	0.00108851	scaf29	1659544	1661829	+	1263	-	-	-	-	-	-	-	101744771
BGIBMGA014107	18.4423	4.09203	32.7925	8.01375	3.00248	0.000106594	0.00114075	scaf76	1240788	1245251	-	510	-	GO:0005515;	-	-	-	-	-	-
BGIBMGA006319	33.2602	12.6376	53.8828	4.26368	2.0921	0.000106957	0.00114368	scaf49	1594424	1599642	+	675	-	-	-	-	-	-	-	-
BGIBMGA009947	78.3789	44.6125	112.145	2.51377	1.32985	0.000109813	0.00116938	scaf267	27452	28427	-	663	-	-	-	-	-	-	-	-
BGIBMGA011452	79.7065	45.6555	113.758	2.49165	1.3171	0.000113908	0.00120998	scaf22	3142641	3143551	-	399	-	GO:0008083;GO:0008083;GO:0010469;	-	-	-	-	-	-
BGIBMGA001144	538.406	354.825	721.987	2.03477	1.02486	0.00014594	0.00150315	scaf1	5726387	5728730	+	2268	-	-	-	-	-	-	-	-
BGIBMGA005181	39.6626	17.0912	62.234	3.64129	1.86445	0.000160566	0.0016329	scaf119	688854	693372	-	327	-	GO:0003824;GO:0003824;GO:0005992;GO:0005992;	-	-	-	-	-	-
BGIBMGA013507	55.4775	28.3776	82.5773	2.90994	1.54099	0.000173502	0.00175064	scaf101	89629	107742	+	1461	BMCYCE	GO:0005634;GO:0005634;	-	-	-	-	Cyclin E [Source:UniProtKB/TrEMBL;Acc:B6ZL90]"	-
BGIBMGA002253	31.5453	12.0895	51.0011	4.21864	2.07678	0.000183844	0.00184777	scaf34	3113611	3120863	-	540	-	GO:0016020;GO:0016021;GO:0016021;	-	-	-	-	-	-
BGIBMGA012609	309.754	199.846	419.662	2.09992	1.07034	0.000222432	0.00216468	scaf100	712063	713367	+	1305	-	GO:0000166;GO:0005524;GO:0005524;GO:0005524;	K22399	-	-	-	AAA family ATPase[Source:UniProtKB/TrEMBL;Acc:Q1HQ67]	732909
BGIBMGA006630	151.091	98.3453	203.837	2.07267	1.05149	0.000223308	0.00217156	scaf10	2971867	2973790	-	1314	-	-	-	-	-	-	-	-
BGIBMGA009419	362.861	236.328	489.394	2.07083	1.05021	0.000255735	0.00243184	scaf81	797698	805479	+	615	-	GO:0003723;GO:0003723;GO:0005737;GO:0005737;	-	-	-	-	-	-
BGIBMGA000029	544.215	352.381	736.049	2.08879	1.06266	0.000287907	0.00268818	scaf98	110692	111813	-	471	-	GO:0003723;GO:0003723;GO:0005730;GO:0005730;	K11129	-	-	-	Nucleolar protein family A member 2[Source:UniProtKB/TrEMBL;Acc:Q1HPV4]	732976
BGIBMGA009817	362.922	209.702	516.142	2.46132	1.29943	0.000295693	0.0027509	scaf161	98786	99190	+	405	BMRPA3	GO:0003677;GO:0003677;GO:0005634;GO:0005634;GO:0006260;GO:0006260;GO:0006281;GO:0006281;GO:0006310;GO:0006310;	K10740	-	-	-	Replication protein A small subunit[Source:UniProtKB/TrEMBL;Acc:Q5TLD1]	692486
BGIBMGA009361	104.531	66.8387	142.223	2.12786	1.0894	0.000297928	0.0027677	scaf53	376131	381877	+	609	-	GO:0003924;GO:0003924;GO:0005525;GO:0005525;	K07917	-	-	-	-	101737287
BGIBMGA003374	75.7564	44.6125	106.9	2.3962	1.26075	0.000298547	0.00276946	scaf42	151804	163030	-	1767	-	GO:0005509;GO:0005509;	-	-	-	-	-	-
BGIBMGA005699	128.449	76.9755	179.922	2.3374	1.2249	0.000330053	0.00299488	scaf143	66557	67057	-	501	-	GO:0006281;GO:0006281;GO:0008413;GO:0008413;GO:0016787;GO:0016787;	K17816	-	-	-	-	101739539
BGIBMGA000470	120.952	79.8645	162.04	2.02894	1.02073	0.000339625	0.00306447	scaf18	5431781	5447496	+	1200	-	GO:0004046;GO:0004046;GO:0005737;GO:0005737;GO:0006508;GO:0006508;GO:0006520;GO:0006520;GO:0008237;GO:0008237;GO:0016787;GO:0016787;	-	-	-	-	-	-
BGIBMGA004775	166.076	84.0483	248.103	2.95191	1.56165	0.000348625	0.00313909	scaf57	1599790	1601872	+	636	-	GO:0016787;GO:0016787;GO:0016818;GO:0016818;GO:0046872;GO:0046872;	K08077	EC:3.6.1.45	-	-	-	101741144
BGIBMGA010403	271.004	135.938	406.07	2.98716	1.57878	0.000350032	0.00314832	scaf6	5323239	5338975	-	1467	-	GO:0016491;GO:0016491;GO:0016491;GO:0016620;GO:0016620;GO:0055114;GO:0055114;GO:0055114;	K00128	EC:1.2.1.3	-	-	Mitochondrial aldehyde dehydrogenase[Source:UniProtKB/TrEMBL;Acc:Q2F5Y9]	692889
BGIBMGA003730	195.763	126.83	264.696	2.08702	1.06144	0.00037556	0.00333271	scaf9	6580515	6582746	+	723	-	GO:0003723;GO:0003723;GO:0005634;GO:0005634;GO:0005737;GO:0005737;GO:0006397;GO:0006397;	K12839	-	-	-	-	101736899
BGIBMGA003387	97.1378	62.0769	132.199	2.1296	1.09058	0.000404943	0.00355187	scaf42	456715	467611	+	1152	-	GO:0016020;GO:0016021;GO:0016021;GO:0022857;	-	-	-	-	-	-
BGIBMGA013463	386.337	253.076	519.599	2.05313	1.03783	0.000415816	0.00362129	scaf111	147261	151658	+	654	-	-	K06685	-	-	-	-	101739784
BGIBMGA012352	94.1434	59.8309	128.456	2.14698	1.10231	0.000430081	0.0037167	scaf26	3591183	3595945	+	432	-	GO:0003677;GO:0003677;GO:0016589;GO:0016589;GO:0071339;GO:0071339;	-	-	-	-	-	101738367
BGIBMGA005249	84.5809	52.4083	116.754	2.22777	1.1556	0.00044959	0.00386714	scaf58	1199215	1201698	-	735	-	GO:0005525;GO:0005525;	-	-	-	-	-	-
BGIBMGA000941	113.669	72.3353	155.003	2.14285	1.09953	0.000504915	0.00428297	scaf1	9302120	9306751	-	861	-	GO:0005515;	-	-	-	-	-	-
BGIBMGA004618	23.5245	2.55419	44.4949	17.4203	4.1227	0.000525117	0.0044339	scaf128	329522	342278	-	1086	-	GO:0005576;GO:0005576;GO:0008083;GO:0008083;GO:0008083;GO:0010469;	K04669	-	-	-	-	101735420
BGIBMGA002216	78.9576	48.023	109.892	2.28832	1.19429	0.000526528	0.00444291	scaf122	124177	135141	-	897	-	-	-	-	-	-	-	-
BGIBMGA008135	122.32	34.6239	210.017	6.06566	2.60066	0.000557039	0.00465621	scaf52	1702204	1707037	-	1674	-	GO:0005515;	-	-	-	-	-	-
BGIBMGA011012	100.737	65.8757	135.599	2.05841	1.04153	0.00062501	0.00513928	scaf31	4476465	4480564	-	1560	-	GO:0016020;GO:0016021;GO:0016021;GO:0016021;GO:0022857;GO:0022857;GO:0055085;GO:0055085;	-	-	-	-	-	-
BGIBMGA013448	483.827	308.995	658.659	2.13162	1.09195	0.000627061	0.00515286	scaf111	182006	188797	-	954	SPARC	GO:0005509;GO:0005509;GO:0005515;GO:0005518;GO:0005518;GO:0005615;GO:0005615;GO:0007165;GO:0050840;GO:0062023;GO:0062023;	-	-	-	-	Secreted protein acidic and rich in cysteine[Source:UniProtKB/TrEMBL;Acc:Q1HPY3]	732958
BGIBMGA014598	96.0647	62.1185	130.011	2.09295	1.06554	0.000631425	0.00518211	scaf512	2435	4470	-	492	-	-	-	-	-	-	-	101735771
BGIBMGA013872	17.9289	5.08172	30.7762	6.05626	2.59843	0.00063293	0.00519116	scaf62	1604691	1627469	+	885	-	GO:0003677;GO:0003677;GO:0003677;GO:0005634;GO:0005634;GO:0006355;GO:0006355;GO:0043565;GO:0043565;GO:0046872;GO:0046872;	-	-	-	-	-	-
BGIBMGA009745	56.7255	31.8532	81.5977	2.56168	1.35709	0.000645399	0.00526994	scaf27	1156905	1161640	+	420	-	GO:0016020;GO:0016021;GO:0016021;	-	-	-	-	-	-
BGIBMGA003568	24.7034	9.0671	40.3396	4.44901	2.15348	0.000646551	0.00527601	scaf9	1681632	1687999	-	771	-	GO:0004252;GO:0004252;GO:0006508;GO:0006508;GO:0006508;GO:0008233;GO:0008236;GO:0016787;	K01312	EC:3.4.21.4	-	-	-	101738495
BGIBMGA004678	13.2631	2.55419	23.9719	9.38535	3.23041	0.000665079	0.00541203	scaf140	76700	86049	-	1482	-	GO:0004497;GO:0004497;GO:0005506;GO:0005506;GO:0016491;GO:0016705;GO:0016705;GO:0020037;GO:0020037;GO:0046872;GO:0055114;GO:0055114;GO:0055114;	-	-	-	-	-	-
BGIBMGA014580	90.7219	27.5628	153.881	5.58291	2.48102	0.000668192	0.00543196	scaf576	13570	13881	-	312	H4-L	GO:0000786;GO:0000786;GO:0000786;GO:0003677;GO:0003677;GO:0003677;GO:0005634;GO:0005634;GO:0005634;GO:0005694;GO:0006334;GO:0006334;GO:0006352;GO:0006352;GO:0046982;GO:0046982;	K11254	-	-	-	Histone H4 [Source:UniProtKB/TrEMBL;Acc:B9X1S5]"	100301501
BGIBMGA011468	44.8883	22.9344	66.8422	2.9145	1.54325	0.000689229	0.00556343	scaf22	1886359	1891536	-	1206	-	GO:0003824;GO:0003824;GO:0005783;GO:0005789;GO:0005789;GO:0016020;GO:0016787;GO:0019439;GO:0019439;GO:0033961;GO:0033961;GO:0033961;	-	-	-	-	-	-
BGIBMGA004702	76.138	46.6451	105.631	2.26456	1.17923	0.000689546	0.00556343	scaf108	183133	191300	+	1179	-	GO:0004128;GO:0004128;GO:0016491;GO:0016491;GO:0016491;GO:0055114;GO:0055114;GO:0055114;	-	-	-	-	-	-
BGIBMGA003541	70.2556	42.0316	98.4797	2.34299	1.22835	0.000752382	0.00595482	scaf9	2551534	2553778	-	1503	-	-	-	-	-	-	-	-
BGIBMGA013975	14.1584	3.02237	25.2944	8.36907	3.06507	0.000790599	0.00620017	scaf29	1836398	1837621	+	1224	-	GO:0003723;GO:0003723;GO:0003723;GO:0005634;GO:0005634;GO:0006396;GO:0006396;GO:1990904;GO:1990904;	K18733	-	-	-	-	101745593
BGIBMGA000618	38.5657	18.869	58.2625	3.08774	1.62655	0.00081424	0.00633543	scaf8	807938	809125	+	192	-	GO:0000413;GO:0003755;GO:0003755;GO:0016853;	-	-	-	-	-	-
BGIBMGA003328	9.61245	1.01634	18.2086	17.9158	4.16316	0.000865106	0.00667879	scaf42	2053484	2054128	-	645	-	GO:0005576;GO:0005576;	-	-	-	-	-	-
BGIBMGA003656	285.25	118.082	452.418	3.83137	1.93786	0.000869193	0.00669829	scaf9	2976092	2984767	+	1068	-	GO:0003824;GO:0003824;GO:0030170;GO:0030170;	-	-	-	-	-	-
BGIBMGA009012	469.629	289.296	649.961	2.2467	1.16781	0.000904749	0.00692673	scaf17	4058313	4059663	+	327	-	GO:0005739;GO:0005739;GO:0009055;GO:0009055;GO:0020037;GO:0020037;GO:0022900;GO:0046872;GO:0046872;GO:0055114;GO:0070469;GO:0070469;	-	-	-	-	-	-
BGIBMGA008398	78.1167	48.7045	107.529	2.20778	1.1426	0.000911996	0.00696566	scaf2	863499	866651	-	525	-	GO:0016020;GO:0016021;GO:0016021;	-	-	-	-	-	-
BGIBMGA007947	74.4993	45.6821	103.316	2.26164	1.17737	0.000917304	0.00700205	scaf3	8260076	8263410	+	333	-	GO:0000166;GO:0005524;GO:0005524;GO:0016209;GO:0016491;GO:0032542;GO:0032542;GO:0032542;GO:0055114;GO:0055114;GO:0055114;GO:0098869;	-	-	-	-	Sulfiredoxin [Source:UniProtKB/TrEMBL;Acc:H9JEK0]"	-
BGIBMGA008235	153.918	100.138	207.698	2.07412	1.0525	0.000925529	0.0070523	scaf121	558529	561388	+	468	-	GO:0005344;GO:0005344;GO:0015671;GO:0019825;GO:0019825;GO:0020037;GO:0020037;GO:0046872;GO:0046872;	-	-	-	-	-	-
BGIBMGA012993	16.557	4.58687	28.5271	6.2193	2.63675	0.000936285	0.00713004	scaf4	4178256	4179238	+	264	-	-	-	-	-	-	-	-
BGIBMGA012771	100.261	66.5305	133.991	2.01397	1.01004	0.000978691	0.00742664	scaf4	8224637	8230887	-	747	-	-	-	-	-	-	-	-
BGIBMGA004070	46.634	12.6376	80.6303	6.38018	2.6736	0.000983966	0.00745788	scaf36	373741	376819	+	372	-	-	-	-	-	-	-	101744061
BGIBMGA007012	225.985	144.857	307.113	2.12011	1.08414	0.00103014	0.0077531	scaf21	2509332	2531167	-	1356	-	-	-	-	-	-	-	-
BGIBMGA010980	78.1983	49.4393	106.957	2.16341	1.11331	0.00105066	0.00788917	scaf83	193394	194278	-	885	-	GO:0003677;GO:0003677;GO:0003677;GO:0005634;GO:0005634;GO:0006355;GO:0006355;GO:0043565;GO:0043565;	K09310	-	-	-	-	101743730
BGIBMGA001410	42.0573	21.7581	62.3565	2.8659	1.51899	0.00106641	0.00797946	scaf7	6078917	6082848	-	3165	-	GO:0003676;GO:0003676;	-	-	-	-	-	-
BGIBMGA013075	84.5004	53.4513	115.549	2.16177	1.11221	0.00118848	0.00872922	scaf4	7813373	7822152	+	1233	-	GO:0000166;GO:0004496;GO:0004496;GO:0004496;GO:0005524;GO:0005524;GO:0005524;GO:0005737;GO:0005737;GO:0005737;GO:0006629;GO:0006694;GO:0008202;GO:0008299;GO:0008299;GO:0016126;GO:0016126;GO:0016301;GO:0016310;GO:0016740;GO:0019287;GO:0019287;	-	-	-	-	-	-
BGIBMGA014208	77.4037	48.8378	105.97	2.16983	1.11758	0.00124967	0.00910234	scaf207	94788	96662	+	504	-	GO:0016020;GO:0016021;GO:0016021;GO:0020037;GO:0020037;GO:0020037;GO:0046872;GO:0046872;	-	-	-	-	-	-
BGIBMGA006893	13.2991	2.96905	23.6291	7.95848	2.99249	0.00130162	0.00943275	scaf44	3062358	3066496	-	729	-	GO:0006508;GO:0006508;GO:0008234;GO:0008234;	-	-	-	-	-	-
BGIBMGA009688	59.1534	34.9172	83.3896	2.38821	1.25593	0.00131166	0.0094895	scaf27	1212348	1228317	-	1809	-	GO:0003677;GO:0003677;GO:0003677;GO:0003700;GO:0003700;GO:0003707;GO:0003707;GO:0004887;GO:0004887;GO:0005634;GO:0005634;GO:0005634;GO:0006351;GO:0006351;GO:0006355;GO:0006355;GO:0006355;GO:0008270;GO:0008270;GO:0030522;GO:0043401;GO:0043565;GO:0043565;GO:0046872;	-	-	-	-	-	-
BGIBMGA006062	32.6085	12.7709	52.446	4.10667	2.03797	0.00133645	0.00963003	scaf5	825753	837569	-	1014	-	GO:0005890;GO:0005890;GO:0006813;GO:0006813;GO:0006814;GO:0006814;GO:0016020;GO:0016021;	-	-	-	-	-	-
BGIBMGA007505	119.555	72.4419	166.669	2.30072	1.20209	0.00141003	0.0100823	scaf66	1363848	1367997	-	372	-	GO:0000166;GO:0003924;GO:0003924;GO:0005525;GO:0005525;GO:0005525;GO:0005622;GO:0005622;GO:0007264;GO:0007264;	-	-	-	-	-	-
BGIBMGA003641	15.0575	4.06537	26.0495	6.40766	2.6798	0.00143361	0.0102338	scaf9	2319969	2320688	+	720	-	GO:0003677;GO:0003700;GO:0003700;GO:0005634;GO:0005634;GO:0006351;GO:0006355;GO:0006355;GO:0043565;GO:0043565;	-	-	-	-	-	-
BGIBMGA000915	86.3878	55.324	117.452	2.12297	1.08609	0.0014351	0.0102364	scaf1	10684547	10689945	-	984	-	-	-	-	-	-	-	-
BGIBMGA013705	556.607	104.47	1008.74	9.65582	3.2714	0.00143556	0.0102364	scaf104	231065	237540	-	882	-	GO:0008168;GO:0016740;GO:0017174;GO:0017174;GO:0032259;	K00552	EC:2.1.1.20	-	-	-	101738705
BGIBMGA001198	48.3447	21.998	74.6914	3.39537	1.76357	0.00148019	0.0105139	scaf1	8859742	8873984	+	861	-	GO:0005634;GO:0005634;	-	-	-	-	-	-
BGIBMGA008021	63.2162	38.4877	87.9448	2.28501	1.1922	0.00152365	0.0107751	scaf41	737875	738732	-	858	-	-	-	-	-	-	-	101735824
BGIBMGA010430	24.2131	9.58861	38.8376	4.05039	2.01806	0.0015431	0.0108769	scaf6	2440029	2444006	-	324	-	GO:0003676;GO:0003676;GO:0003723;GO:0003723;GO:0016020;GO:0016021;GO:0016021;	-	-	-	-	-	-
BGIBMGA005813	62.2694	37.5247	87.0141	2.31885	1.21341	0.00157159	0.0110354	scaf54	1108720	1109586	+	384	-	GO:0005634;GO:0005634;GO:0046982;GO:0046982;	K11656	-	-	-	-	101740858
BGIBMGA008721	80.6243	51.9401	109.308	2.10451	1.07348	0.00163257	0.0113707	scaf90	1023915	1030050	+	1230	-	GO:0004888;GO:0004888;GO:0005216;GO:0005216;GO:0005230;GO:0005230;GO:0005886;GO:0005886;GO:0006811;GO:0006811;GO:0006811;GO:0016020;GO:0016021;GO:0016021;GO:0016021;GO:0034220;GO:0034220;	-	-	-	-	-	-
BGIBMGA010908	34.7852	15.1652	54.4053	3.58752	1.84299	0.00164968	0.0114707	scaf195	44377	45666	-	1290	-	GO:0005634;GO:0005634;GO:0005737;GO:0005739;GO:0005759;GO:0005759;GO:0008033;GO:0008168;GO:0009019;GO:0009019;GO:0009019;GO:0016740;GO:0030488;GO:0030488;GO:0030488;GO:0032259;GO:0052906;GO:0052906;	-	-	-	-	tRNA (guanine(37)-N1)-methyltransferase[Source:UniProtKB/TrEMBL;Acc:H9JN05]	-
BGIBMGA008499	30.5738	14.1222	47.0255	3.32991	1.73548	0.00166989	0.0115743	scaf2	5946441	5954166	+	684	-	-	-	-	-	-	-	-
BGIBMGA013132	20.6926	7.55592	33.8293	4.47719	2.16259	0.00169616	0.0117335	scaf124	3144	9799	-	750	-	GO:0003677;GO:0003677;GO:0003700;GO:0003700;GO:0005634;GO:0005634;GO:0005634;GO:0006351;GO:0006355;GO:0006355;	-	-	-	-	-	-
BGIBMGA008251	76.4793	48.8911	104.068	2.12856	1.08988	0.00172413	0.011899	scaf94	247216	250358	-	759	-	-	-	-	-	-	-	-
BGIBMGA014579	16.5757	5.02839	28.1231	5.59285	2.48358	0.00173709	0.0119564	scaf576	17419	17793	-	375	H2A-L2	GO:0000786;GO:0000786;GO:0000786;GO:0003677;GO:0003677;GO:0003677;GO:0005634;GO:0005634;GO:0005634;GO:0005694;GO:0046982;GO:0046982;	-	-	-	-	Histone H2A [Source:UniProtKB/TrEMBL;Acc:B9A9Z3]"	-
BGIBMGA012702	86.3985	55.5373	117.26	2.11137	1.07818	0.00176083	0.0120747	scaf69	852802	855503	+	606	-	GO:0006629;GO:0006631;GO:0006633;GO:0006633;GO:0016020;GO:0016021;GO:0016021;GO:0016021;GO:0016740;GO:0102336;GO:0102336;GO:0102337;GO:0102337;GO:0102338;GO:0102338;GO:0102756;GO:0102756;	-	-	-	-	-	-
BGIBMGA001058	64.6331	39.7174	89.5489	2.25465	1.17291	0.00178306	0.0122141	scaf1	1736418	1737245	-	294	-	-	-	-	-	-	-	-
BGIBMGA003657	32.4254	15.6333	49.2174	3.14823	1.65454	0.00186263	0.0127253	scaf9	2987036	2987236	+	201	-	GO:0003824;GO:0003824;GO:0030170;GO:0030170;	-	-	-	-	-	-
BGIBMGA012534	50.8687	29.299	72.4383	2.47238	1.3059	0.00187024	0.0127638	scaf77	1025741	1027775	-	456	-	GO:0007267;GO:0007267;	-	-	-	-	-	-
BGIBMGA000451	22.4551	5.60322	39.307	7.01507	2.81046	0.00192899	0.0131161	scaf18	4037744	4040406	+	363	-	-	-	-	-	-	-	-
BGIBMGA000619	94.9328	43.0746	146.791	3.40783	1.76885	0.00194866	0.0132359	scaf8	840181	842206	+	447	-	GO:0000413;GO:0003755;GO:0003755;GO:0005509;GO:0005509;GO:0016853;	-	-	-	-	-	-
BGIBMGA006629	796.523	503.821	1089.22	2.16192	1.11232	0.00204653	0.0137772	scaf10	2979227	2986329	-	855	-	-	-	-	-	-	-	-
BGIBMGA006280	26.8059	6.17804	47.4337	7.67779	2.94069	0.0020831	0.0139942	scaf49	1258263	1259038	-	192	CECA	GO:0002376;GO:0005576;GO:0005576;GO:0005576;GO:0019731;GO:0019731;GO:0042742;GO:0045087;GO:0045087;	-	-	-	-	Cecropin-A [Source:UniProtKB/Swiss-Prot;Acc:Q27239]	-
BGIBMGA009703	119.202	73.5233	164.881	2.24257	1.16515	0.00209276	0.0140074	scaf27	462604	472649	-	1113	-	-	-	-	-	-	-	-
BGIBMGA006498	83.718	54.4826	112.953	2.0732	1.05186	0.00209328	0.0140074	scaf11	4188824	4189197	+	300	-	-	-	-	-	-	-	-
BGIBMGA014285	77.881	50.7638	104.998	2.06837	1.04849	0.00212425	0.0141745	scaf821	1402	2514	-	192	CECA	GO:0002376;GO:0005576;GO:0005576;GO:0005576;GO:0019731;GO:0019731;GO:0042742;GO:0045087;GO:0045087;	K20696	-	-	-	Cecropin-A [Source:UniProtKB/Swiss-Prot;Acc:Q27239]	693029
BGIBMGA007853	57.3031	34.5023	80.1038	2.32169	1.21518	0.00213146	0.0142152	scaf3	3730080	3732341	+	240	-	-	-	-	-	-	-	-
BGIBMGA006942	347.514	175.241	519.787	2.96613	1.56858	0.00213545	0.0142345	scaf44	873215	874389	+	1008	-	GO:0003676;GO:0003676;	K09195	-	-	-	-	101741557
BGIBMGA004668	82.9228	55.0841	110.762	2.01077	1.00775	0.00247178	0.0160711	scaf135	368034	369738	+	420	-	-	-	-	-	-	-	-
BGIBMGA008049	844.194	518.125	1170.26	2.25865	1.17546	0.00247457	0.0160791	scaf41	613874	621186	+	1047	-	GO:0016020;GO:0016021;GO:0016021;GO:0016747;GO:0016747;	-	-	-	-	-	-
BGIBMGA004619	55.6666	33.5926	77.7405	2.31421	1.21052	0.00248104	0.0161049	scaf128	214772	216457	-	912	-	GO:0000139;GO:0000139;GO:0005794;GO:0006486;GO:0006486;GO:0008378;GO:0008378;GO:0016020;GO:0016020;GO:0016020;GO:0016021;GO:0016021;GO:0016740;GO:0016757;	-	-	-	-	-	-
BGIBMGA001204	24.7481	10.7116	38.7845	3.6208	1.85631	0.00248521	0.0161238	scaf1	9062203	9066151	+	705	-	GO:0046872;GO:0046872;	-	-	-	-	-	-
BGIBMGA012941	26.2263	11.5946	40.858	3.52387	1.81716	0.00249213	0.0161545	scaf4	1203644	1217615	+	1401	-	GO:0003824;GO:0003824;GO:0008152;GO:0016020;GO:0016021;GO:0016021;	-	-	-	-	-	-
BGIBMGA008036	163.095	91.8591	234.332	2.55099	1.35106	0.00265547	0.0170227	scaf41	64319	75212	-	948	-	GO:0004672;GO:0004672;GO:0004713;GO:0004713;GO:0005524;GO:0005524;GO:0006468;GO:0006468;GO:0018108;	-	-	-	-	-	-
BGIBMGA013330	132.602	82.6853	182.518	2.20738	1.14234	0.00267078	0.0170954	scaf142	216639	217646	+	1008	CROC	GO:0003677;GO:0003700;GO:0003700;GO:0005634;GO:0005634;GO:0006355;GO:0006355;GO:0043565;GO:0043565;	K09396	-	-	-	Transcription factor crocodile[Source:UniProtKB/TrEMBL;Acc:G5EI84]	100852390
BGIBMGA006321	35.4666	13.7606	57.1727	4.1548	2.05478	0.00289169	0.0183049	scaf49	1656756	1669293	+	720	-	GO:0004383;GO:0004383;GO:0006182;GO:0006182;GO:0020037;GO:0020037;	-	-	-	-	-	-
BGIBMGA009433	35.1965	18.2409	52.1521	2.85908	1.51555	0.00296881	0.0186427	scaf40	3564911	3565402	-	156	-	-	-	-	-	-	-	-
BGIBMGA007527	20.6902	8.13075	33.2497	4.08938	2.03188	0.00305094	0.0189727	scaf66	872115	872945	-	831	-	-	-	-	-	-	-	101742824
BGIBMGA010162	23.3563	8.73223	37.9804	4.34945	2.12083	0.00310867	0.0192203	scaf15	2109180	2111198	-	726	-	GO:0016020;GO:0016021;GO:0016021;GO:0016021;GO:0022857;GO:0022857;GO:0055085;GO:0055085;	-	-	-	-	-	-
BGIBMGA003927	498.886	7.06108	990.712	140.306	7.13243	0.003282	0.0200374	scaf249	41510	53374	+	1299	FMO3	GO:0004497;GO:0004499;GO:0004499;GO:0016491;GO:0050660;GO:0050660;GO:0050661;GO:0050661;GO:0055114;GO:0055114;GO:0055114;	-	-	-	-	Flavin-dependent monooxygenase FMO3A[Source:UniProtKB/TrEMBL;Acc:D7PGZ6]	-
BGIBMGA007547	32.0895	16.2882	47.8908	2.94023	1.55593	0.00328281	0.0200374	scaf66	165264	169608	-	1668	-	GO:0016787;GO:0016787;	-	-	-	-	-	101737532
BGIBMGA008964	1738.59	1140.83	2336.36	2.04795	1.03418	0.0032911	0.020069	scaf17	1616566	1617042	+	477	E(SPL)MALPHA	GO:0007219;GO:0007219;GO:0007423;GO:0007423;	-	-	-	-	M4-like protein[Source:UniProtKB/TrEMBL;Acc:B7U628]	100216502
BGIBMGA002121	76.7983	50.7372	102.859	2.0273	1.01956	0.00331702	0.0201863	scaf23	3121783	3122283	+	501	-	GO:0016020;GO:0016021;GO:0016021;	-	-	-	-	-	101736593
BGIBMGA002120	75.242	49.6942	100.79	2.0282	1.0202	0.00334895	0.0203256	scaf23	3025721	3039204	+	1533	-	GO:0004198;GO:0004198;GO:0005622;GO:0005622;GO:0006508;GO:0006508;GO:0016020;GO:0016021;GO:0016021;	-	-	-	-	-	-
BGIBMGA005011	172.463	102.757	242.169	2.3567	1.23677	0.00337136	0.020452	scaf32	4153137	4153502	-	366	-	-	-	-	-	-	-	101738514
BGIBMGA000479	34.4362	18.2142	50.6582	2.78125	1.47573	0.00382548	0.0225715	scaf8	7908396	7914470	-	393	-	-	-	-	-	-	-	-
BGIBMGA006990	220.19	145.26	295.121	2.03167	1.02266	0.00382585	0.0225715	scaf21	4414527	4417516	-	447	-	GO:0016020;GO:0016021;GO:0016021;GO:0019991;GO:0019991;	-	-	-	-	-	-
BGIBMGA008901	17.7792	6.51292	29.0455	4.45968	2.15694	0.0039527	0.0231187	scaf17	2421048	2421642	-	330	-	GO:0016020;GO:0016021;GO:0016021;	-	-	-	-	-	-
BGIBMGA001908	45.155	18.2675	72.0424	3.94374	1.97957	0.00396497	0.0231589	scaf28	311730	312696	-	882	-	GO:0016020;GO:0016021;GO:0016021;GO:0016021;GO:0055085;GO:0055085;	-	-	-	-	-	-
BGIBMGA011880	20.1871	8.10408	32.2701	3.98195	1.99348	0.00409845	0.0237342	scaf16	6082961	6087484	+	1053	-	GO:0008270;GO:0008270;GO:0009056;GO:0009056;GO:0016788;GO:0016788;GO:0046872;	K07048	-	-	-	Phosphotriesterase-like protein[Source:UniProtKB/TrEMBL;Acc:E5LAN2]	100526775
BGIBMGA005855	330.675	189.976	471.374	2.48122	1.31105	0.00412358	0.0238262	scaf125	24203	24825	+	198	-	-	-	-	-	-	-	-
BGIBMGA005958	27.3268	13.1058	41.5478	3.17018	1.66457	0.00456016	0.0258162	scaf5	7059983	7068731	-	846	-	-	-	-	-	-	-	101735520
BGIBMGA000223	19.7584	8.05076	31.466	3.90845	1.9666	0.00488282	0.0273901	scaf18	5460692	5479652	-	1368	-	GO:0005215;GO:0005215;GO:0016020;GO:0016021;GO:0016021;GO:0016021;GO:0022857;GO:0022857;GO:0055085;GO:0055085;	-	-	-	-	-	-
BGIBMGA008509	33.9939	18.4275	49.5603	2.68947	1.42732	0.00519559	0.028817	scaf2	6641153	6641917	+	765	-	GO:0016491;GO:0016491;GO:0055114;	-	-	-	-	-	101735610
BGIBMGA000637	22.6576	10.1634	35.1518	3.45865	1.79021	0.00551231	0.030267	scaf8	2010959	2011651	+	564	-	-	-	-	-	-	-	-
BGIBMGA006718	53.3586	33.6993	73.0179	2.16675	1.11553	0.0056075	0.0305763	scaf10	3446836	3454293	+	1020	-	GO:0016020;GO:0016021;GO:0016021;	-	-	-	-	-	-
BGIBMGA010017	266.561	176.097	357.024	2.02743	1.01965	0.00607143	0.0324877	scaf45	1476732	1488364	-	585	-	-	-	-	-	-	-	-
BGIBMGA009448	199.727	107.374	292.08	2.72021	1.44372	0.00607484	0.0324925	scaf40	2208520	2214076	-	657	-	-	-	-	-	-	-	101736168
BGIBMGA002030	85.8205	47.5282	124.113	2.61135	1.3848	0.00607862	0.0324992	scaf23	1743586	1752184	-	375	-	GO:0005096;GO:0005096;GO:0043547;GO:0046872;GO:0046872;	-	-	-	-	-	-
BGIBMGA004355	64.3435	42.1382	86.5488	2.05392	1.03838	0.00613327	0.0327506	scaf37	3978131	3983924	-	3696	-	GO:0003676;GO:0003676;	-	-	-	-	-	-
BGIBMGA011442	22.3303	9.56195	35.0987	3.67067	1.87604	0.0062018	0.0330344	scaf22	3799150	3800488	-	876	-	-	-	-	-	-	-	-
BGIBMGA006064	4.78378	0	9.56756	Inf	Inf	0.00630047	0.0335045	scaf5	665136	665939	-	282	-	-	-	-	-	-	-	-
BGIBMGA005254	58.5777	37.9129	79.2425	2.09012	1.06359	0.00647041	0.0341405	scaf58	839751	840643	-	222	-	GO:0003677;GO:0003677;GO:0003677;GO:0005634;GO:0005634;	-	-	-	-	-	-
BGIBMGA004169	48.343	29.8355	66.8504	2.24063	1.16391	0.00665729	0.0349369	scaf60	603695	606087	-	561	-	GO:0005737;GO:0005737;GO:0120009;GO:0120009;GO:0120013;GO:0120013;	-	-	-	-	-	-
BGIBMGA000449	17.4816	6.95443	28.0088	4.02747	2.00987	0.00745702	0.0384951	scaf18	3961027	3963606	+	618	-	-	-	-	-	-	-	-
BGIBMGA001599	57.7924	37.7913	77.7935	2.0585	1.04159	0.00799317	0.040612	scaf7	8131495	8135385	+	1317	-	GO:0005215;GO:0005215;GO:0016020;GO:0016021;GO:0016021;GO:0016021;GO:0022857;GO:0022857;GO:0055085;GO:0055085;	-	-	-	-	-	-
BGIBMGA009376	279.743	184.883	374.604	2.02617	1.01876	0.00818171	0.0414067	scaf53	1921994	1924630	+	1278	-	GO:0005215;GO:0005215;GO:0016020;GO:0016021;GO:0016021;GO:0016021;GO:0022857;GO:0022857;GO:0055085;GO:0055085;	-	-	-	-	-	-
BGIBMGA004445	25.1756	4.58687	45.7643	9.97722	3.31864	0.00860293	0.0431878	scaf37	1111761	1118603	+	909	-	GO:0004252;GO:0004252;GO:0006508;GO:0006508;	-	-	-	-	-	-
BGIBMGA000901	45.9234	28.4576	63.3891	2.22749	1.15542	0.00875929	0.0437625	scaf1	11006009	11009820	-	465	-	-	-	-	-	-	-	-
BGIBMGA009432	38.7668	22.961	54.5726	2.37675	1.24899	0.00895399	0.0445624	scaf40	3612950	3628284	-	552	TOY	GO:0003677;GO:0003677;GO:0003677;GO:0005634;GO:0005634;GO:0006351;GO:0006351;GO:0006355;GO:0006355;GO:0006355;GO:0007275;GO:0007275;	K08031	-	-	-	Pak6 [Source:UniProtKB/TrEMBL;Acc:E9JEI5]"	100529217
BGIBMGA007371	58.118	38.0995	78.1364	2.05085	1.03622	0.00902393	0.0447532	scaf55	586451	588873	-	582	-	GO:0003677;GO:0003677;GO:0003677;GO:0005634;GO:0005634;GO:0006351;GO:0006351;GO:0006355;GO:0006355;	-	-	-	-	Bm8 interacting protein 2d-2[Source:UniProtKB/TrEMBL;Acc:D5MTP4]	100500750
BGIBMGA004485	14.9477	5.57656	24.3189	4.36092	2.12463	0.00922874	0.045508	scaf37	2705509	2706489	+	207	-	-	-	-	-	-	-	-
BGIBMGA012269	48.8533	30.6236	67.0831	2.19057	1.13131	0.00926341	0.045644	scaf26	1585166	1588778	-	1923	-	GO:0005085;GO:0005085;GO:0005085;GO:0005622;GO:0005622;GO:0007264;GO:0007264;	-	-	-	-	-	-
BGIBMGA011587	46.1862	28.9791	63.3932	2.18755	1.12932	0.00937189	0.0460201	scaf22	4617858	4623628	+	4320	-	GO:0005615;GO:0005615;	-	-	-	-	-	100272001
BGIBMGA009128	20.3007	9.25373	31.3476	3.38756	1.76025	0.0094232	0.0462368	scaf96	1014763	1016618	-	1677	-	-	-	-	-	-	-	-
BGIBMGA003014	73.1291	11.1531	135.105	12.1137	3.59856	0.00945532	0.0463768	scaf13	4022228	4023110	-	468	-	GO:0020037;GO:0020037;GO:0020037;GO:0046872;GO:0046872;	-	-	-	-	-	101746637
BGIBMGA010693	41.347	18.3742	64.3198	3.50056	1.80758	0.00968877	0.0472878	scaf148	11230	11796	-	567	-	-	-	-	-	-	-	-
BGIBMGA008440	47.582	11.648	83.5161	7.17002	2.84198	0.0103518	0.0499938	scaf2	1679752	1690553	+	3327	-	GO:0005506;GO:0005506;GO:0009055;GO:0009055;GO:0016491;GO:0016491;GO:0016614;GO:0022900;GO:0046872;GO:0046872;GO:0046872;GO:0050660;GO:0050660;GO:0051536;GO:0051536;GO:0051536;GO:0051537;GO:0051537;GO:0051537;GO:0055114;GO:0055114;GO:0071949;GO:0071949;	-	-	-	-	-	-
BGIBMGA009439	4.37969	0	8.75937	Inf	Inf	0.0104084	0.0502465	scaf40	2588902	2605343	-	924	-	GO:0003677;GO:0003677;GO:0005634;GO:0005634;	-	-	-	-	-	-
BGIBMGA007254	56.1107	36.3217	75.8996	2.08965	1.06326	0.0104909	0.0505515	scaf92	1472039	1485956	-	1407	-	-	-	-	-	-	-	-
BGIBMGA011335	20.0034	9.12043	30.8864	3.38651	1.7598	0.0108583	0.0519722	scaf12	2159105	2160588	+	801	-	-	-	-	-	-	-	-
BGIBMGA003773	9.65157	2.4742	16.8289	6.80176	2.76591	0.0109587	0.052375	scaf91	98467	113887	-	1041	-	GO:0005576;GO:0005576;GO:0006030;GO:0006030;GO:0008061;GO:0008061;	-	-	-	-	-	-
BGIBMGA001419	7.8854	1.53785	14.233	9.25513	3.21025	0.0111739	0.0531863	scaf7	5214603	5217863	-	1089	-	GO:0004497;GO:0004497;GO:0005506;GO:0005506;GO:0016491;GO:0016705;GO:0016705;GO:0020037;GO:0020037;GO:0046872;GO:0055114;GO:0055114;GO:0055114;	-	-	-	-	-	-
BGIBMGA000882	98.408	55.8456	140.97	2.52429	1.33588	0.0113611	0.053931	scaf1	12329356	12330213	-	405	-	GO:0003735;GO:0003735;GO:0005622;GO:0005622;GO:0005840;GO:0005840;GO:0006412;GO:0006412;	-	-	-	-	-	-
BGIBMGA012521	13.1191	1.51118	24.7271	16.3627	4.03234	0.0116154	0.0549025	scaf183	149994	152645	+	939	-	GO:0005576;GO:0005576;	K19919	-	-	-	-	101746572
BGIBMGA012398	9.50667	2.4742	16.5391	6.68463	2.74085	0.0128604	0.0594444	scaf82	1664306	1668792	+	315	-	GO:0055114;GO:0055114;	-	-	-	-	-	-
BGIBMGA005472	171.783	69.1647	274.402	3.96737	1.98818	0.0129568	0.0598168	scaf19	3870164	3877893	+	897	PDXK	GO:0008478;GO:0008478;GO:0009443;GO:0009443;GO:0016301;GO:0016310;	K00868	EC:2.7.1.35	-	-	Pyridoxal kinase[Source:UniProtKB/TrEMBL;Acc:Q1PCB1]	693009
BGIBMGA011962	26.3657	14.1755	38.5559	2.7199	1.44356	0.0131037	0.0603437	scaf59	363719	377372	+	3825	-	GO:0016020;GO:0016021;GO:0016021;	-	-	-	-	-	-
BGIBMGA012426	11.8728	4.09203	19.6535	4.80287	2.2639	0.0137522	0.0627245	scaf86	487119	492430	-	642	-	GO:0004252;GO:0004252;GO:0006508;GO:0006508;	-	-	-	-	-	-
BGIBMGA012988	12.7643	4.66686	20.8617	4.47018	2.16033	0.0138731	0.0630973	scaf4	3844688	3845532	+	348	-	-	-	-	-	-	-	-
BGIBMGA006803	10.1715	2.99571	17.3473	5.79073	2.53374	0.0143912	0.064972	scaf70	1809328	1810428	-	333	-	-	-	-	-	-	-	-
BGIBMGA000655	16.5933	7.14106	26.0455	3.64728	1.86682	0.0145574	0.0655159	scaf8	3180051	3184604	+	783	-	-	-	-	-	-	-	-
BGIBMGA006048	23.0672	10.6316	35.5028	3.33936	1.73957	0.0152126	0.0677656	scaf5	1015603	1022574	-	1038	-	GO:0016020;GO:0016021;GO:0016021;GO:0016491;GO:0016491;GO:0055114;	-	-	-	-	-	-
BGIBMGA005162	169.644	110.835	228.454	2.06121	1.04349	0.0153731	0.0683984	scaf32	3035333	3037793	+	591	-	GO:0003735;GO:0003735;GO:0005840;GO:0005840;GO:0005840;GO:0006412;GO:0006412;	K02867	-	-	-	-	101736605
BGIBMGA010286	21.2223	10.6316	31.8129	2.9923	1.58125	0.0157317	0.0697772	scaf15	5534102	5540082	+	972	-	GO:0008152;GO:0015020;GO:0015020;GO:0016020;GO:0016021;GO:0016021;GO:0016740;GO:0016757;GO:0016758;GO:0016758;	-	-	-	-	-	-
BGIBMGA008662	4.03478	0	8.06957	Inf	Inf	0.0157672	0.0698461	scaf90	1341537	1342574	-	288	-	-	-	-	-	-	-	-
BGIBMGA007655	5.44706	0	10.8941	Inf	Inf	0.0159039	0.0702354	scaf3	7374495	7375466	-	972	-	-	-	-	-	-	-	-
BGIBMGA014469	41.9248	25.5952	58.2543	2.27598	1.18649	0.0162733	0.0715772	scaf261	29452	34048	-	1350	-	-	-	-	-	-	-	101738727
BGIBMGA003553	22.708	11.648	33.7681	2.89906	1.53558	0.0164532	0.0721332	scaf9	2059544	2070266	-	804	-	GO:0016020;GO:0016021;GO:0016021;	-	-	-	-	-	101740465
BGIBMGA013534	46.1553	29.6073	62.7034	2.11784	1.08259	0.0166455	0.0728031	scaf101	932338	936453	+	1152	-	GO:0006508;GO:0006508;GO:0008236;GO:0008236;	-	-	-	-	-	-
BGIBMGA000583	15.6559	6.5929	24.7189	3.74932	1.90663	0.0166776	0.0729186	scaf8	1310185	1321781	-	915	-	GO:0008270;GO:0008270;GO:0008745;GO:0008745;GO:0009253;GO:0009253;GO:0016020;GO:0016021;GO:0016021;	K01446	-	-	-	-	101743847
BGIBMGA005443	12.4799	0	24.9597	Inf	Inf	0.0168228	0.0733541	scaf19	1617251	1621883	+	1461	-	GO:0008152;GO:0015020;GO:0015020;GO:0016020;GO:0016021;GO:0016021;GO:0016740;GO:0016757;GO:0016758;GO:0016758;	-	-	-	-	-	-
BGIBMGA004486	41.3393	26.3183	56.3604	2.14149	1.09862	0.0177487	0.0764856	scaf37	2733224	2740500	+	1197	-	GO:0016020;GO:0016021;GO:0016021;GO:0016021;GO:0022857;GO:0022857;GO:0055085;GO:0055085;	-	-	-	-	-	-
BGIBMGA000091	20.3782	10.2701	30.4864	2.96847	1.56972	0.0179327	0.077021	scaf43	1198756	1206654	-	1107	-	GO:0003677;GO:0003677;GO:0003677;GO:0005634;GO:0005634;GO:0006355;GO:0006355;GO:0043565;GO:0043565;	K15615	-	-	-	-	101745557
BGIBMGA004452	33.2602	15.6867	50.8338	3.24057	1.69625	0.01877	0.0799246	scaf37	1444573	1452984	+	1191	-	GO:0008654;GO:0008654;GO:0016020;GO:0016020;GO:0016020;GO:0016021;GO:0016021;GO:0016740;GO:0016780;GO:0016780;	-	-	-	-	-	-
BGIBMGA000586	16.5702	7.60924	25.5312	3.35528	1.74643	0.0198951	0.0838836	scaf8	1245500	1250087	-	762	-	GO:0008270;GO:0008270;GO:0008745;GO:0008745;GO:0009253;GO:0009253;GO:0016020;GO:0016021;GO:0016021;	-	-	-	-	-	-
BGIBMGA002583	22.6583	12.0628	33.2538	2.75672	1.46295	0.0209307	0.0872791	scaf20	4373867	4374115	-	249	-	-	-	-	-	-	-	-
BGIBMGA006386	20.1208	10.1634	30.0782	2.95945	1.56533	0.0224027	0.092076	scaf11	3420329	3420949	-	621	-	-	-	-	-	-	-	-
BGIBMGA012060	47.9166	31.24	64.5932	2.06764	1.04799	0.0243373	0.0984262	scaf24	1650326	1667011	-	5142	-	GO:0005089;GO:0005089;GO:0035023;GO:0035023;	-	-	-	-	-	-
BGIBMGA013902	37.914	24.3656	51.4623	2.11209	1.07867	0.0249528	0.100474	scaf29	2803916	2805855	-	552	-	GO:0003999;GO:0003999;GO:0005737;GO:0005737;GO:0006168;GO:0006168;GO:0009116;GO:0009116;	K00759	EC:2.4.2.7	-	-	-	101736026
BGIBMGA001582	25.0982	14.1222	36.0742	2.55444	1.35301	0.0251538	0.101094	scaf7	6867620	6870135	+	267	-	-	-	-	-	-	-	-
BGIBMGA002993	5.99713	1.043	10.9513	10.4997	3.39228	0.025614	0.10259	scaf13	4789203	4793691	-	534	-	GO:0003677;GO:0003677;GO:0003700;GO:0003700;GO:0005634;GO:0005634;GO:0005634;GO:0006355;GO:0006355;	-	-	-	-	-	-
BGIBMGA002573	22.4599	12.3028	32.617	2.6512	1.40664	0.0256329	0.10259	scaf20	4982970	5004755	-	2061	-	GO:0003997;GO:0003997;GO:0005777;GO:0005777;GO:0006631;GO:0006631;GO:0006635;GO:0006635;GO:0016627;GO:0016627;GO:0050660;GO:0050660;GO:0055114;GO:0055114;GO:0071949;GO:0071949;	-	-	-	-	Acyl-coenzyme A oxidase[Source:UniProtKB/TrEMBL;Acc:H9IZ88]	-
BGIBMGA010883	15.5717	7.1144	24.0291	3.37753	1.75597	0.0256374	0.10259	scaf61	322677	324423	+	429	H2AX-L	GO:0000786;GO:0000786;GO:0000786;GO:0003677;GO:0003677;GO:0003677;GO:0005634;GO:0005634;GO:0005634;GO:0005694;GO:0046982;GO:0046982;	-	-	-	-	Histone H2A [Source:UniProtKB/TrEMBL;Acc:H9JMY0]"	-
BGIBMGA004168	23.0821	11.1798	34.9844	3.12926	1.64582	0.0261495	0.104186	scaf60	656003	657569	-	333	CHHL	GO:0005179;GO:0005184;GO:0005184;GO:0005576;GO:0005576;GO:0005576;GO:0007218;GO:0007218;GO:0010469;	-	-	-	-	CHH-like protein [Source:UniProtKB/Swiss-Prot;Acc:Q9NL55]	100127118
BGIBMGA014378	1592.28	542.867	2641.69	4.86619	2.28279	0.0266129	0.105542	scaf155	310943	317264	+	924	-	-	-	-	-	-	-	-
BGIBMGA004313	5.81033	1.01634	10.6043	10.4338	3.38319	0.0269787	0.106636	scaf79	10582	13155	+	738	-	GO:0016020;GO:0016021;GO:0016021;GO:0016021;GO:0022857;GO:0022857;GO:0055085;GO:0055085;	-	-	-	-	-	-
BGIBMGA011521	990.997	637.647	1344.35	2.10829	1.07608	0.0279224	0.109622	scaf22	610251	618137	+	1785	-	GO:0000166;GO:0004066;GO:0004066;GO:0005524;GO:0005524;GO:0006529;GO:0006529;GO:0006529;GO:0006541;GO:0006541;GO:0008652;	-	-	-	-	Asparagine synthetase[Source:UniProtKB/TrEMBL;Acc:H9JPR6]	-
BGIBMGA005052	2477.61	1339.8	3615.42	2.69847	1.43214	0.0287205	0.112073	scaf32	2702082	2706063	-	792	-	-	-	-	-	-	-	-
BGIBMGA013822	7.61635	1.97936	13.2533	6.69576	2.74325	0.0290583	0.112971	scaf62	1747829	1757409	-	1641	-	GO:0003824;GO:0003824;GO:0004415;GO:0004415;GO:0004415;GO:0005975;GO:0005975;GO:0006952;GO:0006952;GO:0008152;GO:0016787;GO:0016798;	-	-	-	-	Hyaluronidase[Source:UniProtKB/TrEMBL;Acc:H9JWA8]	-
BGIBMGA003476	15.2878	7.00776	23.5679	3.36311	1.7498	0.0295543	0.114322	scaf9	6332507	6333372	-	471	-	-	-	-	-	-	-	-
BGIBMGA005819	21.1934	11.2064	31.1803	2.78235	1.47631	0.0305465	0.117085	scaf54	1319476	1321985	+	657	-	GO:0015267;GO:0015267;GO:0016020;GO:0016020;GO:0016020;GO:0016021;GO:0016021;GO:0055085;GO:0055085;	-	-	-	-	-	-
BGIBMGA001979	24.1359	13.8139	34.4579	2.49443	1.31871	0.0317205	0.120459	scaf28	4134246	4146732	+	1998	-	-	-	-	-	-	-	-
BGIBMGA009687	9.00127	3.07569	14.9269	4.85317	2.27893	0.0339969	0.127045	scaf27	1239351	1239851	-	339	-	-	-	-	-	-	-	-
BGIBMGA007854	111.72	67.2536	156.187	2.32236	1.21559	0.0340864	0.127254	scaf3	3735638	3737257	+	684	-	GO:0008152;GO:0016787;GO:0016787;	-	-	-	-	-	-
BGIBMGA008655	14.8819	7.1144	22.6495	3.18361	1.67066	0.0345794	0.128587	scaf132	400208	404876	+	675	-	GO:0003676;GO:0003676;	-	-	-	-	-	-
BGIBMGA006354	7.41049	2.08601	12.735	6.10494	2.60998	0.0347345	0.128973	scaf11	6148250	6154413	-	552	-	-	-	-	-	-	-	-
BGIBMGA005223	28.6655	15.0852	42.2458	2.80049	1.48568	0.0382068	0.139264	scaf110	201820	202719	-	303	-	GO:0016021;GO:0016021;GO:0022857;GO:0022857;GO:0055085;GO:0055085;	-	-	-	-	-	-
BGIBMGA011918	6.37217	1.56451	11.1798	7.14592	2.83712	0.0384611	0.139943	scaf59	964154	967076	-	1218	-	GO:0004930;GO:0004930;GO:0004930;GO:0007165;GO:0007186;GO:0007186;GO:0007186;GO:0016020;GO:0016021;GO:0016021;GO:0016021;	K04134	-	-	-	-	101746094
BGIBMGA013288	47.4162	30.0637	64.7687	2.15438	1.10727	0.0386147	0.140194	scaf225	78214	79500	+	1155	-	-	-	-	-	-	-	101746987
BGIBMGA000585	3.2266	0	6.4532	Inf	Inf	0.0396227	0.142848	scaf8	1256295	1264595	-	915	-	GO:0008270;GO:0008270;GO:0008745;GO:0008745;GO:0009253;GO:0009253;GO:0016020;GO:0016021;GO:0016021;	K01446	-	-	-	-	101739748
BGIBMGA011451	32.3226	20.8484	43.7969	2.10073	1.07089	0.0400402	0.143987	scaf22	3160683	3161932	-	291	-	-	-	-	-	-	-	-
BGIBMGA014006	16.9181	8.59892	25.2373	2.93493	1.55333	0.0400503	0.143987	scaf29	3837876	3839421	+	333	-	GO:0016020;GO:0016021;GO:0016021;	-	-	-	-	-	-
BGIBMGA008430	6.23122	1.51118	10.9513	7.24681	2.85735	0.0401057	0.144145	scaf2	1150296	1155033	+	489	-	-	-	-	-	-	-	-
BGIBMGA001146	11.0681	4.56021	17.5759	3.85418	1.94642	0.0413803	0.147943	scaf1	5862583	5873196	+	1155	-	GO:0016020;GO:0016021;GO:0016021;GO:0016021;GO:0055085;GO:0055085;	-	-	-	-	-	-
BGIBMGA008466	3.14088	0	6.28177	Inf	Inf	0.0415221	0.148285	scaf2	3708770	3709795	+	1026	-	-	-	-	-	-	-	-
BGIBMGA000181	6.98369	1.97936	11.988	6.0565	2.59848	0.0438993	0.155126	scaf154	285157	292491	+	1239	-	GO:0005515;	-	-	-	-	-	-
BGIBMGA012899	33.2347	21.8114	44.6581	2.04747	1.03384	0.0475821	0.164678	scaf4	750583	751435	-	225	-	GO:0005524;GO:0005524;	-	-	-	-	-	-
BGIBMGA000675	4.22301	0.494841	7.95119	16.0682	4.00613	0.0488065	0.167789	scaf8	3862407	3867368	+	1269	-	GO:0016020;GO:0016021;GO:0016021;GO:0016021;GO:0055085;GO:0055085;	-	-	-	-	-	-
BGIBMGA008108	24.724	15.2718	34.1763	2.23787	1.16212	0.0490095	0.168307	scaf87	688472	694555	+	762	-	-	-	-	-	-	-	-
BGIBMGA009579	61.1374	32.7096	89.5652	2.73819	1.45322	0.0490457	0.168349	scaf103	769124	776043	-	708	-	GO:0016311;GO:0016791;GO:0016791;	K13248	EC:3.1.3.74	-	-	-	101745817
BGIBMGA001399	1874.99	3270.72	479.268	0.146533	-2.7707	1.13681e-88	1.46477e-84	scaf7	6827311	6837724	-	1011	-	GO:0005975;GO:0005975;GO:0005975;GO:0016311;GO:0016787;GO:0016791;GO:0016791;GO:0042132;GO:0042132;GO:0042578;GO:0042578;	K03841	EC:3.1.3.11	-	-	Fructose-1,6-bisphosphatase[Source:UniProtKB/TrEMBL;Acc:Q1HQ57]	732915
BGIBMGA004276	7963.79	13063.3	2864.23	0.219257	-2.18931	2e-74	1.2885e-70	scaf79	1184485	1196931	-	1914	-	GO:0004611;GO:0004611;GO:0004613;GO:0004613;GO:0005525;GO:0005525;GO:0006094;GO:0006094;GO:0017076;GO:0017076;	-	-	-	-	-	-
BGIBMGA013492	1108.2	1900.96	315.448	0.165941	-2.59125	1.86145e-67	7.99494e-64	scaf101	275853	279751	-	2241	-	GO:0005515;GO:0016020;GO:0016021;GO:0016021;	-	-	-	-	-	101741626
BGIBMGA007675	2840.33	4622.09	1058.56	0.229022	-2.12644	7.74022e-62	1.99465e-58	scaf3	5988208	5988738	-	228	-	GO:0016020;GO:0016021;GO:0016021;	-	-	-	-	-	-
BGIBMGA012838	4706.86	7423.22	1990.5	0.268145	-1.89891	5.2218e-55	1.12138e-51	scaf4	4244120	4250275	-	726	-	-	-	-	-	-	-	-
BGIBMGA008421	1776.35	2869.07	683.639	0.238279	-2.06927	3.09154e-53	5.69065e-50	scaf2	736972	768509	+	3645	-	GO:0005506;GO:0005506;GO:0016491;GO:0016491;GO:0016614;GO:0046872;GO:0046872;GO:0046872;GO:0050660;GO:0050660;GO:0051536;GO:0051537;GO:0051537;GO:0055114;GO:0055114;GO:0071949;GO:0071949;	-	-	-	-	-	-
BGIBMGA006017	9096.52	13888.4	4304.69	0.30995	-1.68989	5.08965e-47	8.19752e-44	scaf5	3248067	3248396	-	330	-	-	-	-	-	-	-	-
BGIBMGA001182	17880	26863.7	8896.34	0.331166	-1.59437	1.63938e-44	2.13247e-41	scaf1	7876736	7883446	+	3951	-	-	-	-	-	-	-	-
BGIBMGA007697	1022.69	1628.32	417.062	0.256131	-1.96505	1.37783e-40	1.61394e-37	scaf3	4387186	4387992	-	807	-	GO:0043565;GO:0043565;	-	-	-	-	-	101736485
BGIBMGA005211	669.258	1126.97	211.543	0.187709	-2.41343	5.22444e-37	5.17823e-34	scaf119	530161	531578	+	1254	-	-	-	-	-	-	-	-
BGIBMGA006018	2232.08	3361.44	1102.72	0.328049	-1.60802	7.00511e-36	6.01739e-33	scaf5	3182792	3183163	-	372	-	-	K20701	-	-	-	-	101738751
BGIBMGA013616	2040.77	3070.93	1010.61	0.32909	-1.60345	1.8011e-35	1.45045e-32	scaf78	449789	476684	+	3360	-	GO:0005509;GO:0005509;GO:0005886;GO:0005886;GO:0007155;GO:0007155;GO:0007156;GO:0007156;GO:0016020;GO:0016020;GO:0016020;GO:0016021;GO:0016021;	-	-	-	-	-	-
BGIBMGA006335	20495	29801.4	11188.7	0.375441	-1.41334	3.66737e-35	2.77965e-32	scaf49	2275116	2276597	+	1482	-	-	-	-	-	-	-	101743105
BGIBMGA002197	1266.09	1935.22	596.964	0.308473	-1.69678	5.33001e-34	3.61459e-31	scaf64	2183886	2194054	+	3735	-	GO:0000166;GO:0004383;GO:0004383;GO:0004383;GO:0004672;GO:0004672;GO:0005524;GO:0005524;GO:0005622;GO:0005622;GO:0006182;GO:0006182;GO:0006182;GO:0006468;GO:0006468;GO:0009190;GO:0009190;GO:0016020;GO:0016021;GO:0016021;GO:0016829;GO:0016849;GO:0016849;GO:0035556;GO:0035556;	K12322	EC:4.6.1.2	-	-	Guanylate cyclase[Source:UniProtKB/TrEMBL;Acc:H9IY64]	101740270
BGIBMGA009298	2689.25	3990.28	1388.22	0.3479	-1.52326	8.81565e-34	5.67948e-31	scaf38	3612292	3617247	+	1128	-	GO:0016301;GO:0016301;GO:0016301;GO:0016310;GO:0016740;GO:0032958;GO:0032958;	-	-	-	-	-	-
BGIBMGA005097	2490.41	3664.94	1315.87	0.359043	-1.47777	7.68915e-32	4.71785e-29	scaf32	24432	25823	+	1074	-	-	-	-	-	-	-	-
BGIBMGA009066	2471.68	3603.63	1339.72	0.37177	-1.42752	7.29186e-30	4.27071e-27	scaf63	1140807	1142628	-	720	-	-	-	-	-	-	-	-
BGIBMGA007573	1177.55	1766.48	588.621	0.333217	-1.58547	8.19929e-30	4.59339e-27	scaf66	909979	923292	+	2559	-	GO:0004649;GO:0004649;GO:0005975;GO:0005975;	-	-	-	-	-	-
BGIBMGA006415	7566.79	11419.5	3714.06	0.325238	-1.62043	1.06786e-29	5.73306e-27	scaf11	1240114	1242300	-	1539	CBZ	GO:0003700;GO:0003700;GO:0006355;GO:0006355;	-	-	-	-	Chorion b-ZIP transcription factor[Source:UniProtKB/TrEMBL;Acc:Q538A5]	692648
BGIBMGA001347	243.057	417.934	68.1811	0.163139	-2.61583	2.13778e-29	1.10181e-26	scaf118	605960	609092	-	663	P25	GO:0005198;GO:0005198;GO:0005198;GO:0005576;GO:0005576;GO:0005576;	-	-	-	-	Fibrohexamerin [Source:UniProtKB/Swiss-Prot;Acc:P04148]	-
BGIBMGA005266	1813.95	2710.37	917.534	0.338528	-1.56265	1.3006e-28	6.44548e-26	scaf58	56770	61320	-	819	-	GO:0005506;GO:0005506;GO:0016705;GO:0016705;GO:0020037;GO:0020037;GO:0055114;GO:0055114;	-	-	-	-	-	-
BGIBMGA012479	1860.27	2706.89	1013.64	0.374466	-1.4171	1.22186e-27	5.62272e-25	scaf56	366145	375670	-	2511	-	GO:0008270;GO:0008270;	-	-	-	-	-	-
BGIBMGA006613	9756.76	13727.8	5785.71	0.421459	-1.24654	3.84248e-27	1.65035e-24	scaf10	4040363	4054326	-	4554	-	-	-	-	-	-	-	-
BGIBMGA013173	2221.09	3240.17	1202.01	0.370973	-1.43061	3.21538e-26	1.29469e-23	scaf39	2031002	2050733	-	1209	-	GO:0046983;GO:0046983;	-	-	-	-	-	-
BGIBMGA002635	35068.8	48545.2	21592.5	0.444791	-1.1688	1.31514e-25	5.13504e-23	scaf20	460294	466597	-	1404	-	GO:0005215;GO:0005215;GO:0016020;GO:0016020;GO:0016020;GO:0016021;GO:0016021;GO:0016021;GO:0022857;GO:0022857;GO:0055085;GO:0055085;	-	-	-	-	-	-
BGIBMGA011276	3867.97	5463.04	2272.91	0.416053	-1.26516	1.40466e-25	5.32325e-23	scaf12	1916600	1921739	-	501	-	-	-	-	-	-	-	-
BGIBMGA009933	22820.9	31548.9	14093	0.446703	-1.16261	3.84094e-25	1.41402e-22	scaf137	275089	296011	-	2346	-	-	-	-	-	-	-	-
BGIBMGA004806	801.738	1197.72	405.752	0.338769	-1.56163	9.86715e-25	3.53162e-22	scaf46	1466982	1506269	-	8526	-	GO:0031409;GO:0031409;	-	-	-	-	-	-
BGIBMGA002611	5521.43	7706.15	3336.72	0.432994	-1.20758	1.40344e-24	4.88738e-22	scaf20	2291042	2302639	-	2580	-	GO:0005515;GO:0010468;GO:0010468;GO:0046872;GO:0046872;GO:0071557;GO:0071557;GO:0071558;GO:0071558;	-	-	-	-	-	-
BGIBMGA014370	1550.54	2215.77	885.317	0.399553	-1.32354	2.93773e-23	9.46317e-21	scaf155	50598	59265	-	3057	-	GO:0005515;GO:0007165;GO:0007165;GO:0016020;GO:0016021;GO:0016021;	-	-	-	-	-	-
BGIBMGA000146	645.7	969.316	322.085	0.33228	-1.58953	4.26808e-23	1.34132e-20	scaf43	2072799	2085395	+	1605	-	GO:0005622;GO:0005622;GO:0035556;GO:0035556;GO:0046872;GO:0046872;	-	-	-	-	-	-
BGIBMGA007087	6412.69	8806.87	4018.52	0.456294	-1.13196	1.80675e-22	5.5321e-20	scaf21	2474064	2477412	+	225	-	GO:0016020;GO:0016021;GO:0016021;GO:0019991;GO:0019991;	-	-	-	-	-	-
BGIBMGA000073	1268.58	1822.38	714.779	0.392223	-1.35025	1.863e-22	5.5321e-20	scaf43	2389587	2396756	-	951	-	GO:0003677;GO:0003677;GO:0005634;GO:0005634;	-	-	-	-	-	-
BGIBMGA003682	2676.73	3736.46	1616.99	0.43276	-1.20836	1.93205e-22	5.5321e-20	scaf9	4061133	4063861	+	747	-	GO:0005515;	-	-	-	-	-	-
BGIBMGA010338	3157.06	4656.09	1658.03	0.356098	-1.48965	2.19462e-21	5.89119e-19	scaf109	339058	376457	+	2706	-	GO:0016491;GO:0016491;GO:0055114;GO:0055114;	-	-	-	-	-	-
BGIBMGA012070	459.641	701.212	218.07	0.31099	-1.68506	2.30599e-21	6.06381e-19	scaf24	681990	690584	-	603	-	GO:0005515;GO:0005634;GO:0005634;GO:0006511;GO:0006511;GO:0007275;GO:0007275;GO:0008270;GO:0008270;GO:0046872;	-	-	-	-	-	-
BGIBMGA011477	319.341	502.74	135.942	0.270402	-1.88682	5.81299e-21	1.44039e-18	scaf22	1335961	1350007	-	1362	-	GO:0000166;GO:0001678;GO:0001678;GO:0004396;GO:0004396;GO:0004396;GO:0005524;GO:0005524;GO:0005524;GO:0005536;GO:0005536;GO:0005623;GO:0005623;GO:0005975;GO:0005975;GO:0006096;GO:0006096;GO:0006096;GO:0016301;GO:0016310;GO:0016740;GO:0016773;GO:0016773;GO:0046835;	K00844	EC:2.7.1.1	-	-	-	101745054
BGIBMGA004178	2739.58	3783.77	1695.39	0.448069	-1.15821	5.9629e-21	1.44966e-18	scaf60	565557	573691	+	1155	-	GO:0006869;GO:0006869;	-	-	-	-	Oxysterol-binding protein[Source:UniProtKB/TrEMBL;Acc:H9J3T9]	-
BGIBMGA002596	4342.94	6230.4	2455.49	0.394115	-1.34331	6.27259e-21	1.49671e-18	scaf20	2906245	2920578	-	3858	-	GO:0016740;GO:0016757;GO:0016757;	-	-	-	-	-	-
BGIBMGA002432	1817.21	2538.29	1096.14	0.431842	-1.21143	9.07346e-21	2.12566e-18	scaf14	1291644	1312807	-	2511	-	GO:0000220;GO:0000220;GO:0006811;GO:0015078;GO:0015078;GO:0015991;GO:0015991;GO:0016020;GO:0016021;GO:0016021;GO:0033179;GO:0033179;	-	-	-	-	-	-
BGIBMGA013098	3733.9	5185.99	2281.8	0.439993	-1.18445	1.00298e-20	2.30776e-18	scaf4	8823434	8827610	+	768	-	-	-	-	-	-	-	-
BGIBMGA012680	1140.58	1623.7	657.455	0.404912	-1.30432	1.0549e-20	2.38462e-18	scaf69	889206	899447	-	570	-	GO:0046872;GO:0046872;	-	-	-	-	-	-
BGIBMGA011198	1310.33	1852.95	767.702	0.414312	-1.27121	1.20748e-20	2.63701e-18	scaf12	4955422	4975881	-	3429	-	-	-	-	-	-	-	-
BGIBMGA007729	961.743	1377.5	545.987	0.396362	-1.33511	2.02814e-20	4.24878e-18	scaf3	1284537	1290944	-	1242	-	GO:0005615;GO:0005615;	-	-	-	-	-	100126553
BGIBMGA011614	374.194	577.535	170.853	0.295831	-1.75715	2.37358e-20	4.85454e-18	scaf16	5382902	5388152	-	498	-	GO:0004842;GO:0004842;GO:0016020;GO:0016021;GO:0016021;GO:0016567;GO:0016567;GO:0016740;GO:0046872;GO:0046872;	-	-	-	-	-	-
BGIBMGA013849	718.336	1048.08	388.588	0.37076	-1.43144	3.39571e-20	6.83652e-18	scaf62	156885	157913	+	1029	-	GO:0005615;GO:0005615;	-	-	-	-	-	-
BGIBMGA008803	28073	40918.1	15227.8	0.372154	-1.42603	3.68923e-20	7.31318e-18	scaf134	755216	755530	-	315	-	-	-	-	-	-	-	101741350
BGIBMGA005599	2172.1	3003.7	1340.5	0.446283	-1.16397	3.92876e-20	7.67e-18	scaf33	41273	44809	+	561	-	GO:0005515;	-	-	-	-	-	-
BGIBMGA008915	681.29	994.695	367.885	0.369848	-1.435	6.59765e-20	1.25016e-17	scaf17	1480331	1481056	-	726	-	GO:0003677;GO:0003677;GO:0005634;GO:0005634;GO:0006351;GO:0006351;GO:0006355;GO:0006355;GO:0006355;GO:0046983;GO:0046983;	-	-	-	-	-	-
BGIBMGA011701	371.771	570.26	173.281	0.303864	-1.7185	1.04384e-19	1.94926e-17	scaf16	1179108	1186424	-	363	-	GO:0016020;GO:0016021;GO:0016021;	-	-	-	-	-	-
BGIBMGA001513	5007.57	6778.8	3236.34	0.47742	-1.06667	1.36447e-19	2.51161e-17	scaf7	1751051	1791156	+	3459	-	GO:0004252;GO:0004252;GO:0006508;GO:0006508;GO:0006508;GO:0008233;GO:0008236;GO:0016020;GO:0016021;GO:0016021;GO:0016787;	-	-	-	-	-	-
BGIBMGA004665	292.39	457.781	126.999	0.277422	-1.84984	1.98245e-19	3.49916e-17	scaf135	284105	284491	+	387	-	-	-	-	-	-	-	-
BGIBMGA012892	1291.17	1806.68	775.666	0.429332	-1.21984	2.89104e-19	5.03393e-17	scaf4	1134195	1147579	-	1338	-	GO:0003824;GO:0003824;GO:0008152;	-	-	-	-	-	-
BGIBMGA013160	1475.73	2240.77	710.685	0.31716	-1.65672	8.32368e-19	1.39286e-16	scaf39	3057410	3058162	-	753	-	GO:0016491;GO:0016491;GO:0055114;	-	-	-	-	-	105842801
BGIBMGA013299	1568.86	2170.68	967.049	0.445506	-1.16648	9.63504e-19	1.59163e-16	scaf71	612593	627389	-	1980	-	GO:0005975;GO:0005975;GO:0016773;GO:0016773;	-	-	-	-	-	-
BGIBMGA000590	2777.96	3778.4	1777.52	0.470442	-1.08791	1.69876e-18	2.70229e-16	scaf8	1029153	1031000	-	345	-	GO:0008083;GO:0008083;GO:0010469;	-	-	-	-	-	-
BGIBMGA009132	71563.9	95635.6	47492.2	0.496596	-1.00986	2.73555e-18	4.22583e-16	scaf96	924094	929331	-	1344	BMTUB2	GO:0000166;GO:0003924;GO:0003924;GO:0003924;GO:0005200;GO:0005200;GO:0005525;GO:0005525;GO:0005525;GO:0005737;GO:0005737;GO:0005856;GO:0005874;GO:0005874;GO:0005874;GO:0007010;GO:0007017;GO:0007017;	K07375	-	-	-	Beta-tubulin [Source:UniProtKB/TrEMBL;Acc:Q8T8B2]"	692511
BGIBMGA013819	5102.83	6843.47	3362.19	0.4913	-1.02533	3.24039e-18	4.91205e-16	scaf62	1849842	1858940	-	2001	-	GO:0005737;GO:0005737;GO:0006629;GO:0006629;GO:0016020;GO:0016021;GO:0016021;GO:0016021;GO:0016627;GO:0016627;GO:0055114;	-	-	-	-	-	-
BGIBMGA012677	744.488	1065.08	423.895	0.397993	-1.32918	3.49124e-18	5.23076e-16	scaf69	1000877	1002754	-	732	-	-	-	-	-	-	-	-
BGIBMGA008245	690.365	992.331	388.4	0.391402	-1.35328	4.11461e-18	6.02463e-16	scaf94	557880	558541	-	264	-	GO:0005198;GO:0005198;GO:0031012;GO:0031012;	-	-	-	-	-	-
BGIBMGA002539	3412.06	4593.75	2230.36	0.485521	-1.0424	5.61588e-18	8.11336e-16	scaf14	5424635	5436986	+	1848	-	GO:0006811;GO:0015078;GO:0015078;GO:0015991;GO:0015991;GO:0016020;GO:0016021;GO:0016021;GO:0033179;GO:0033179;	-	-	-	-	-	-
BGIBMGA013604	199.081	320.776	77.3853	0.241244	-2.05144	9.46461e-18	1.2837e-15	scaf78	119642	122829	-	1065	-	GO:0003676;GO:0003676;GO:0003723;GO:0003730;GO:0003730;GO:0006417;GO:0006417;GO:0045182;GO:0045182;	-	-	-	-	-	-
BGIBMGA005342	2417.85	3269.72	1565.98	0.478933	-1.06211	1.70051e-17	2.23582e-15	scaf19	3420475	3426241	-	1326	-	GO:0004843;GO:0004843;GO:0005622;GO:0005622;GO:0006508;GO:0006511;GO:0006511;GO:0006511;GO:0008233;GO:0008234;GO:0016787;GO:0036459;	-	-	-	-	-	-
BGIBMGA010306	717.683	1021.95	413.413	0.404532	-1.30567	2.70488e-17	3.52044e-15	scaf127	110679	115196	+	1188	-	GO:0004252;GO:0004252;GO:0006508;GO:0006508;GO:0006508;GO:0008233;GO:0008236;GO:0016787;	-	-	-	-	-	-
BGIBMGA001178	781.975	1104.53	459.422	0.415944	-1.26554	2.98619e-17	3.8477e-15	scaf1	7760377	7762584	+	312	-	GO:0016020;GO:0016021;GO:0016021;	-	-	-	-	-	-
BGIBMGA013421	1519.32	2107.74	930.91	0.441663	-1.17898	4.38772e-17	5.54272e-15	scaf50	2459389	2460679	+	1164	-	GO:0003700;GO:0003700;GO:0006355;GO:0006355;	-	-	-	-	-	-
BGIBMGA008174	5650.62	8356.28	2944.97	0.352425	-1.50461	6.09575e-17	7.6256e-15	scaf52	1035138	1037822	+	816	-	-	-	-	-	-	-	-
BGIBMGA010929	602.48	865.083	339.877	0.392883	-1.34783	7.16487e-17	8.87686e-15	scaf68	739663	747047	-	1293	-	GO:0003677;GO:0003677;GO:0005634;GO:0005634;GO:0006351;GO:0006351;GO:0006355;GO:0006355;GO:0006355;GO:0046983;GO:0046983;	-	-	-	-	-	-
BGIBMGA007487	847.436	1190.13	504.746	0.424111	-1.23749	7.26421e-17	8.91422e-15	scaf102	942845	951322	+	900	-	GO:0016020;GO:0016021;GO:0016021;GO:0022857;GO:0022857;GO:0055085;GO:0055085;	-	-	-	-	-	-
BGIBMGA003681	1550.93	2113.19	988.678	0.467861	-1.09585	9.88068e-17	1.20106e-14	scaf9	4023873	4024349	+	477	-	GO:0005515;	-	-	-	-	-	-
BGIBMGA004104	1421.9	1937.4	906.399	0.467844	-1.0959	1.53077e-16	1.82629e-14	scaf36	2048115	2056517	+	1056	-	GO:0003677;GO:0003677;GO:0005634;GO:0005634;	-	-	-	-	-	-
BGIBMGA003680	467.739	741.67	193.808	0.261313	-1.93615	1.5712e-16	1.85733e-14	scaf9	3941440	3944628	+	1122	-	GO:0046872;GO:0046872;GO:0046872;	-	-	-	-	-	-
BGIBMGA013021	45950.7	61489.6	30411.8	0.494584	-1.01571	3.04788e-16	3.53801e-14	scaf4	5085639	5098856	+	1095	-	GO:0003824;GO:0003824;GO:0004332;GO:0004332;GO:0004332;GO:0006096;GO:0006096;GO:0006096;GO:0016829;	K01623	EC:4.1.2.13	-	-	Fructose-bisphosphate aldolase[Source:UniProtKB/TrEMBL;Acc:Q1HPN7]	778467
BGIBMGA013483	163.517	266.24	60.7931	0.228339	-2.13075	3.16497e-16	3.64113e-14	scaf101	970192	973388	-	564	-	GO:0004601;GO:0004601;GO:0006979;GO:0006979;GO:0020037;GO:0020037;GO:0055114;GO:0055114;GO:0098869;	-	-	-	-	-	-
BGIBMGA003999	1062.07	1465.66	658.488	0.449279	-1.15432	3.34039e-16	3.79149e-14	scaf36	2975117	2986372	-	2028	-	GO:0003676;GO:0003676;	-	-	-	-	-	-
BGIBMGA006787	863.085	1256.96	469.21	0.37329	-1.42163	3.35452e-16	3.79149e-14	scaf10	6969461	6969836	+	267	-	-	-	-	-	-	-	-
BGIBMGA002433	225.727	353.942	97.5123	0.275503	-1.85986	3.70368e-16	4.14973e-14	scaf14	1218057	1224476	-	2007	-	-	-	-	-	-	-	-
BGIBMGA012699	1280	1750.18	809.813	0.462703	-1.11184	3.80395e-16	4.22534e-14	scaf69	691978	700845	+	5823	-	GO:0006211;GO:0070579;GO:0080111;	-	-	-	-	-	-
BGIBMGA013619	419.331	614.568	224.095	0.364638	-1.45546	3.87476e-16	4.2672e-14	scaf78	503773	512198	+	672	-	GO:0016020;GO:0016021;GO:0016021;	-	-	-	-	-	-
BGIBMGA008006	545.962	783.292	308.631	0.394018	-1.34367	4.0985e-16	4.47536e-14	scaf41	1574565	1577208	-	1272	-	GO:1990817;GO:1990817;	-	-	-	-	-	-
BGIBMGA002851	2695.05	3676.93	1713.18	0.465926	-1.10183	4.85063e-16	5.25213e-14	scaf30	7111	9775	+	1770	-	GO:0004888;GO:0004888;GO:0004930;GO:0004930;GO:0007166;GO:0007166;GO:0007186;GO:0007186;GO:0016020;GO:0016021;GO:0016021;GO:0016021;	K04599	-	-	-	-	101745169
BGIBMGA014040	752.526	1055.96	449.091	0.425292	-1.23347	6.35942e-16	6.772e-14	scaf204	45078	57727	+	5307	-	GO:0005201;GO:0005201;GO:0005581;GO:0005581;GO:0005581;GO:0005604;	-	-	-	-	-	-
BGIBMGA003874	1843.47	2528.45	1158.49	0.458183	-1.126	6.51271e-16	6.87838e-14	scaf72	114424	122687	-	858	-	GO:0003700;GO:0003700;GO:0006355;GO:0006355;GO:0006357;	-	-	-	-	-	-
BGIBMGA010681	156.288	255.235	57.34	0.224655	-2.15421	7.55777e-16	7.88139e-14	scaf84	1412149	1418779	+	1062	-	GO:0006629;GO:0006629;GO:0006633;GO:0006633;GO:0016020;GO:0016021;GO:0016021;GO:0016491;GO:0016717;GO:0016717;GO:0055114;GO:0055114;GO:0055114;	K00507	EC:1.14.19.1	-	-	-	692568
BGIBMGA006686	910.006	1256.89	563.118	0.448024	-1.15835	1.98348e-15	2.02835e-13	scaf10	1810409	1815624	+	2598	-	GO:0001104;GO:0003712;GO:0003712;GO:0005634;GO:0006351;GO:0006357;GO:0006357;GO:0016592;GO:0016592;	-	-	-	-	-	-
BGIBMGA010256	384.246	563.054	205.437	0.364862	-1.45458	3.71005e-15	3.73469e-13	scaf15	3648176	3662611	+	1770	-	-	-	-	-	-	-	-
BGIBMGA010598	1941.4	2589.87	1292.93	0.499223	-1.00224	5.34108e-15	5.25342e-13	scaf234	45340	47340	-	966	-	-	-	-	-	-	-	105841884
BGIBMGA006238	177.809	282.597	73.022	0.258396	-1.95234	1.06094e-14	9.69521e-13	scaf88	702225	705323	-	423	-	-	-	-	-	-	-	101739535
BGIBMGA012336	2102.66	3400.07	805.254	0.236834	-2.07805	1.50243e-14	1.31974e-12	scaf26	2276001	2284775	+	996	LDH	GO:0003824;GO:0003824;GO:0004459;GO:0004459;GO:0004459;GO:0005737;GO:0005737;GO:0005975;GO:0005975;GO:0016491;GO:0016491;GO:0016491;GO:0016616;GO:0016616;GO:0019752;GO:0019752;GO:0055114;GO:0055114;GO:0055114;	K00016	EC:1.1.1.27	-	-	L-lactate dehydrogenase[Source:UniProtKB/TrEMBL;Acc:A7LBQ0]	100124423
BGIBMGA002746	626.474	877.682	375.265	0.427564	-1.22579	1.50565e-14	1.31974e-12	scaf117	22570	24949	-	408	-	-	-	-	-	-	-	-
BGIBMGA009857	1572.3	2098.79	1045.82	0.498296	-1.00492	1.54197e-14	1.33345e-12	scaf51	815915	840215	-	3660	-	GO:0000166;GO:0003774;GO:0003774;GO:0003774;GO:0003779;GO:0003779;GO:0005515;GO:0005524;GO:0005524;GO:0005524;GO:0016459;GO:0016459;GO:0016459;	-	-	-	-	-	-
BGIBMGA012504	60.4089	110.675	10.1431	0.0916476	-3.44776	1.94701e-14	1.63969e-12	scaf56	1793390	1806247	+	1167	-	GO:0004888;GO:0004888;GO:0005216;GO:0005216;GO:0005230;GO:0005230;GO:0005886;GO:0005886;GO:0006811;GO:0006811;GO:0006811;GO:0016020;GO:0016021;GO:0016021;GO:0016021;GO:0034220;GO:0034220;	-	-	-	-	-	-
BGIBMGA001566	216.425	333.106	99.745	0.299439	-1.73966	2.34167e-14	1.92869e-12	scaf7	5745769	5763125	+	5877	-	GO:0005622;GO:0005622;GO:0007268;GO:0007268;GO:0019992;GO:0019992;GO:0035556;GO:0035556;GO:0046872;GO:0046872;	-	-	-	-	-	-
BGIBMGA006324	343.902	503.641	184.163	0.365663	-1.45141	2.35005e-14	1.92869e-12	scaf49	1761614	1766927	+	720	-	GO:0004252;GO:0004252;GO:0006508;GO:0006508;	-	-	-	-	-	-
BGIBMGA007432	346.152	514.234	178.069	0.34628	-1.52999	5.16802e-14	4.16187e-12	scaf55	2353318	2359901	+	498	-	-	-	-	-	-	-	-
BGIBMGA011691	1485.9	2078.56	893.235	0.429738	-1.21847	5.87798e-14	4.62796e-12	scaf16	1365818	1373814	-	2826	-	GO:0004970;GO:0004970;GO:0005216;GO:0005216;GO:0005234;GO:0005886;GO:0006811;GO:0006811;GO:0006811;GO:0016020;GO:0016020;GO:0016020;GO:0016021;GO:0016021;GO:0030054;GO:0030054;GO:0034220;GO:0035235;GO:0038023;GO:0038023;GO:0045202;GO:0045211;GO:0045211;	-	-	-	-	-	-
BGIBMGA004378	521.338	780.291	262.385	0.336266	-1.57233	6.02604e-14	4.70579e-12	scaf37	2840432	2847390	-	1038	-	-	-	-	-	-	-	101739669
BGIBMGA011603	630.287	875.231	385.343	0.440276	-1.18352	9.38918e-14	7.15855e-12	scaf16	6156650	6174686	-	3345	-	GO:0000166;GO:0005524;GO:0005524;GO:0016301;GO:0016307;GO:0016307;GO:0016307;GO:0016310;GO:0016740;GO:0046488;GO:0046488;GO:0046488;GO:0046854;	-	-	-	-	-	-
BGIBMGA009881	771.547	1178.61	364.485	0.30925	-1.69315	1.08395e-13	8.16764e-12	scaf51	664194	691500	+	3420	-	GO:0003779;GO:0003779;GO:0016043;GO:0016043;GO:0017048;GO:0017048;GO:0030036;GO:0030036;	-	-	-	-	-	-
BGIBMGA006136	608.918	848.543	369.294	0.435209	-1.20022	1.15625e-13	8.61172e-12	scaf5	3641106	3647485	+	699	-	GO:0004672;GO:0004672;GO:0005524;GO:0005524;GO:0006468;GO:0006468;	-	-	-	-	-	-
BGIBMGA007397	7024.76	9894.78	4154.74	0.419892	-1.25191	1.40703e-13	1.03659e-11	scaf55	780051	781377	+	645	-	GO:0005737;GO:0005737;GO:0009968;GO:0009968;	-	-	-	-	-	-
BGIBMGA001732	3686.91	5546.59	1827.23	0.329433	-1.60194	1.40787e-13	1.03659e-11	scaf35	572010	575232	+	645	-	GO:0005740;GO:0005740;GO:0016020;GO:0016021;GO:0016021;GO:0016021;GO:0043065;GO:0043065;	-	-	-	-	-	-
BGIBMGA002435	773.469	1056.89	490.047	0.463669	-1.10883	1.89026e-13	1.37605e-11	scaf14	1178019	1195310	-	1467	-	-	-	-	-	-	-	-
BGIBMGA003646	311.943	456.715	167.171	0.366029	-1.44997	2.10351e-13	1.52268e-11	scaf9	2481791	2505492	+	2919	-	GO:0005515;GO:0016020;GO:0016021;GO:0016021;	-	-	-	-	-	-
BGIBMGA014562	349.179	505.709	192.649	0.380948	-1.39233	3.19557e-13	2.27486e-11	scaf442	6464	12182	-	936	-	GO:0005267;GO:0005267;GO:0006811;GO:0016020;GO:0016020;GO:0016020;GO:0016021;GO:0016021;GO:0016021;GO:0071805;GO:0071805;	-	-	-	-	-	-
BGIBMGA013161	1205.39	1801.63	609.144	0.338107	-1.56445	3.24699e-13	2.29876e-11	scaf39	3034644	3036845	-	645	-	GO:0016491;GO:0016491;GO:0055114;	-	-	-	-	-	-
BGIBMGA003349	100.836	168.941	32.7313	0.193744	-2.36778	3.36287e-13	2.36779e-11	scaf42	1014613	1018676	-	1722	-	GO:0003676;GO:0003676;GO:0005615;GO:0005615;GO:0008168;GO:0008168;GO:0032259;GO:0032259;	-	-	-	-	-	-
BGIBMGA010407	628.06	889.022	367.098	0.412923	-1.27606	4.38646e-13	3.00636e-11	scaf6	4786990	4789721	-	945	-	-	-	-	-	-	-	-
BGIBMGA004335	708.117	965.103	451.132	0.467445	-1.09713	6.63589e-13	4.43023e-11	scaf79	1042179	1046966	+	984	-	-	-	-	-	-	-	-
BGIBMGA006676	511.925	714.969	308.88	0.432019	-1.21083	7.12926e-13	4.73508e-11	scaf10	519122	521807	+	1347	-	GO:0004672;GO:0004672;GO:0005524;GO:0005524;GO:0006468;GO:0006468;	-	-	-	-	-	-
BGIBMGA004404	26176.3	41406.2	10946.4	0.264366	-1.91939	8.80742e-13	5.81967e-11	scaf37	1568113	1568868	-	756	-	GO:0005576;GO:0005576;	-	-	-	-	30K protein 5[Source:UniProtKB/TrEMBL;Acc:H9J4G4]	101746510
BGIBMGA001564	132.812	216.881	48.7439	0.224749	-2.15361	1.00254e-12	6.5907e-11	scaf7	5545416	5554980	+	1839	-	-	-	-	-	-	-	-
BGIBMGA011982	2045.18	2836.96	1253.39	0.441807	-1.17851	1.49404e-12	9.67371e-11	scaf59	1392001	1431668	+	12990	-	GO:0005509;GO:0005509;GO:0005515;GO:0016020;GO:0016021;GO:0016021;	-	-	-	-	-	-
BGIBMGA012074	642.1	876.906	407.294	0.464468	-1.10635	2.04594e-12	1.29225e-10	scaf24	297792	299098	-	1056	-	-	-	-	-	-	-	101738147
BGIBMGA004955	351.271	500.337	202.204	0.404136	-1.30709	3.98409e-12	2.39883e-10	scaf65	14157	25964	-	1611	-	GO:0005615;GO:0005615;GO:0016020;GO:0016020;GO:0016020;GO:0016021;GO:0016021;GO:0030001;GO:0030001;GO:0046873;GO:0046873;GO:0055085;GO:0055085;	-	-	-	-	-	-
BGIBMGA004110	244.246	361.661	126.831	0.350691	-1.51173	4.94972e-12	2.96638e-10	scaf36	2446016	2452925	+	1014	-	GO:0005622;GO:0005622;GO:0009190;GO:0009190;GO:0016849;GO:0016849;GO:0035556;GO:0035556;	-	-	-	-	-	-
BGIBMGA005980	5704.39	7626.52	3782.26	0.495935	-1.01178	1.50715e-11	8.40677e-10	scaf5	5763566	5772183	-	5085	-	GO:0003676;GO:0003676;	-	-	-	-	-	-
BGIBMGA008072	712.665	956.329	469.002	0.490419	-1.02791	1.56535e-11	8.69379e-10	scaf41	1380811	1389272	+	963	-	GO:0004089;GO:0004089;GO:0008270;GO:0008270;	K01672	EC:4.2.1.1	-	-	-	101738069
BGIBMGA014360	234.679	356.467	112.892	0.316698	-1.65882	1.80161e-11	9.87822e-10	scaf138	4319	5799	+	516	IRP1	GO:0002376;GO:0003674;GO:0005576;GO:0005576;GO:0042742;GO:0042742;GO:0042832;GO:0042832;GO:0045087;GO:0045087;	-	-	-	-	Putative defense protein [Source:UniProtKB/Swiss-Prot;Acc:Q008X1]	778525
BGIBMGA006425	215.558	319.212	111.904	0.350565	-1.51225	2.16236e-11	1.16092e-09	scaf11	921672	925194	-	471	-	GO:0005515;	-	-	-	-	-	-
BGIBMGA012314	240.039	389.778	90.2999	0.23167	-2.10986	2.17996e-11	1.16551e-09	scaf26	621386	623193	+	1200	-	GO:0003676;GO:0003676;	-	-	-	-	-	101744006
BGIBMGA004595	112.896	181.191	44.601	0.246155	-2.02236	2.22971e-11	1.17726e-09	scaf48	1593840	1601712	+	1296	-	GO:0000166;GO:0001678;GO:0001678;GO:0004396;GO:0004396;GO:0004396;GO:0005524;GO:0005524;GO:0005524;GO:0005536;GO:0005536;GO:0005623;GO:0005623;GO:0005975;GO:0005975;GO:0006096;GO:0006096;GO:0006096;GO:0016301;GO:0016310;GO:0016740;GO:0016773;GO:0016773;GO:0046835;	-	-	-	-	-	-
BGIBMGA008543	985.915	1375.67	596.156	0.433356	-1.20638	2.30849e-11	1.20914e-09	scaf2	9344540	9345019	+	480	-	-	-	-	-	-	-	101744991
BGIBMGA007046	598.084	864.046	332.121	0.384379	-1.3794	2.32609e-11	1.21343e-09	scaf21	538858	543585	-	1380	-	GO:0004252;GO:0004252;GO:0006508;GO:0006508;GO:0006508;GO:0008233;GO:0008236;GO:0016787;	-	-	-	-	-	-
BGIBMGA005212	737.049	1202.04	272.055	0.226327	-2.14352	2.92776e-11	1.51639e-09	scaf119	549276	550566	+	1110	-	-	-	-	-	-	-	-
BGIBMGA001613	366.992	515.917	218.066	0.422676	-1.24238	2.9304e-11	1.51639e-09	scaf35	3904904	3910983	-	1137	BMO.9491	GO:0005975;GO:0006012;GO:0006012;GO:0006012;GO:0008108;GO:0008108;GO:0008108;GO:0008270;GO:0008270;GO:0016740;GO:0016779;GO:0033499;GO:0033499;GO:0046872;	-	-	-	-	Galactose-1-phosphate uridylyltransferase[Source:UniProtKB/TrEMBL;Acc:H9IWI1]	-
BGIBMGA013452	52.8689	94.7865	10.9513	0.115536	-3.11358	3.19589e-11	1.6406e-09	scaf111	84851	93107	-	912	-	GO:0005515;	-	-	-	-	-	-
BGIBMGA006268	642.963	866.571	419.356	0.483926	-1.04714	3.2877e-11	1.68103e-09	scaf49	1960237	1963563	-	495	-	-	-	-	-	-	-	-
BGIBMGA001272	474.447	651.654	297.239	0.45613	-1.13248	3.91002e-11	1.98349e-09	scaf1	12900308	12922336	+	2214	-	GO:0006508;GO:0006508;GO:0008236;GO:0008236;GO:0016020;GO:0016021;GO:0016021;	-	-	-	-	-	-
BGIBMGA001807	94.4253	154.564	34.2864	0.221827	-2.1725	5.01052e-11	2.4831e-09	scaf35	3057554	3065764	+	1242	-	GO:0004222;GO:0004222;GO:0006508;GO:0006508;GO:0008237;GO:0008237;	-	-	-	-	-	-
BGIBMGA000591	86.697	143.544	29.8496	0.207947	-2.26571	5.88148e-11	2.87056e-09	scaf8	878398	883160	-	3246	-	GO:0005515;	-	-	-	-	-	-
BGIBMGA008709	1851.65	2479.37	1223.94	0.493648	-1.01845	6.02185e-11	2.92798e-09	scaf90	406890	408545	+	1656	-	GO:0004553;GO:0004553;GO:0004568;GO:0004568;GO:0005975;GO:0005975;GO:0006032;GO:0006032;GO:0008061;GO:0008061;GO:0008152;GO:0016787;GO:0016798;	-	-	-	-	-	-
BGIBMGA005852	495.008	676.523	313.492	0.463388	-1.10971	6.55599e-11	3.17571e-09	scaf125	47362	49893	-	534	-	GO:0005737;GO:0005737;GO:0042325;GO:0042325;	-	-	-	-	-	-
BGIBMGA013642	494.231	751.086	237.377	0.316044	-1.6618	9.11448e-11	4.33016e-09	scaf78	1326051	1347024	+	1524	-	GO:0016020;GO:0016021;GO:0016021;GO:0016021;GO:0055085;GO:0055085;	-	-	-	-	-	-
BGIBMGA004813	327.704	524.776	130.631	0.248928	-2.0062	9.14088e-11	4.33016e-09	scaf46	1272178	1274713	-	162	-	-	-	-	-	-	-	-
BGIBMGA010067	221.366	324.08	118.652	0.366118	-1.44962	9.46612e-11	4.4515e-09	scaf45	1252039	1256864	+	1059	-	GO:0005545;GO:0005545;GO:0030136;GO:0030136;GO:0030276;GO:0030276;GO:0048268;GO:0048268;	-	-	-	-	-	-
BGIBMGA009263	563.557	784.225	342.889	0.437233	-1.19353	1.25429e-10	5.81352e-09	scaf38	907304	910597	+	3294	-	-	-	-	-	-	-	105842505
BGIBMGA003791	172.451	258.699	86.2018	0.333212	-1.58549	1.27735e-10	5.87808e-09	scaf91	839519	850971	+	867	-	GO:0016020;GO:0016021;GO:0016021;	K18264	-	-	-	-	101739397
BGIBMGA006579	95.7912	155.394	36.1885	0.232883	-2.10232	1.2968e-10	5.94637e-09	scaf10	5326482	5333183	-	822	-	GO:0004888;GO:0004888;GO:0005216;GO:0005216;GO:0005230;GO:0005230;GO:0005886;GO:0005886;GO:0006811;GO:0006811;GO:0006811;GO:0016020;GO:0016021;GO:0016021;GO:0016021;GO:0034220;GO:0034220;	-	-	-	-	-	-
BGIBMGA006338	427.776	586.273	269.279	0.459307	-1.12247	1.6789e-10	7.51134e-09	scaf49	2347163	2374400	+	4497	-	-	-	-	-	-	-	-
BGIBMGA011449	127.993	200.205	55.7808	0.278619	-1.84364	1.72107e-10	7.67334e-09	scaf22	3399966	3407139	-	1410	-	-	-	-	-	-	-	-
BGIBMGA003253	120.312	188.305	52.3195	0.277844	-1.84765	1.81322e-10	8.05631e-09	scaf73	244285	246733	+	291	-	-	-	-	-	-	-	-
BGIBMGA001958	57.5745	100.336	14.8126	0.147629	-2.75995	2.8496e-10	1.228e-08	scaf28	2976517	2977584	+	873	CPG31	-	-	-	-	-	Putative cuticle protein CPG31[Source:UniProtKB/TrEMBL;Acc:D0VEM6]	101738773
BGIBMGA010521	153.717	231.78	75.6547	0.326408	-1.61525	3.83107e-10	1.61318e-08	scaf6	1998552	2009556	+	1560	-	GO:0004114;GO:0004114;GO:0005515;GO:0007165;GO:0007165;	-	-	-	-	-	-
BGIBMGA004745	553.945	740.263	367.628	0.496619	-1.00979	4.02955e-10	1.68029e-08	scaf57	1512237	1521808	-	612	-	GO:0005758;GO:0005758;	-	-	-	-	-	101740359
BGIBMGA003093	251.222	358.731	143.713	0.400616	-1.31971	4.21827e-10	1.74767e-08	scaf13	1500441	1508008	+	1137	-	GO:0003779;GO:0003779;GO:0016192;GO:0016192;GO:0045010;GO:0045010;GO:0046872;GO:0046872;	-	-	-	-	-	-
BGIBMGA007911	415.921	568.204	263.638	0.463985	-1.10785	4.888e-10	2.0122e-08	scaf3	6253212	6268517	+	3018	-	GO:0045216;GO:0045216;	-	-	-	-	-	-
BGIBMGA001944	396.244	544.123	248.365	0.456449	-1.13147	5.00532e-10	2.04741e-08	scaf28	2437585	2444466	+	987	-	GO:0016020;GO:0016021;GO:0016021;	-	-	-	-	-	-
BGIBMGA000145	261.684	388.475	134.893	0.347237	-1.52601	6.72218e-10	2.6983e-08	scaf43	2045801	2046564	+	630	-	GO:0016020;GO:0016021;GO:0016021;	-	-	-	-	-	-
BGIBMGA008857	525.169	723.951	326.387	0.450841	-1.14931	8.48852e-10	3.32446e-08	scaf17	5355320	5355886	-	267	-	-	-	-	-	-	-	-
BGIBMGA003684	145.898	220.908	70.8873	0.32089	-1.63985	1.07388e-09	4.05775e-08	scaf9	4150961	4155043	+	1566	-	GO:0004359;GO:0004359;GO:0005515;GO:0006541;GO:0006541;	-	-	-	-	-	-
BGIBMGA014224	149.025	223.314	74.7363	0.334669	-1.57919	1.7105e-09	6.19724e-08	scaf80	1524763	1528391	-	1323	-	-	-	-	-	-	Yellow-f [Source:UniProtKB/TrEMBL;Acc:H9JXF8]"	101736658
BGIBMGA000891	65.1897	109.404	20.976	0.19173	-2.38285	2.15691e-09	7.65615e-08	scaf1	11339969	11352405	-	1620	-	GO:0004888;GO:0004888;GO:0005216;GO:0005216;GO:0005230;GO:0005230;GO:0005886;GO:0005886;GO:0006811;GO:0006811;GO:0006811;GO:0016020;GO:0016021;GO:0016021;GO:0016021;GO:0034220;GO:0034220;	-	-	-	-	-	-
BGIBMGA003123	463.456	645.976	280.937	0.434903	-1.20124	2.2203e-09	7.85949e-08	scaf13	3106441	3116296	+	831	-	-	-	-	-	-	-	-
BGIBMGA007987	124.42	189.884	58.9564	0.310486	-1.6874	4.06281e-09	1.42254e-07	scaf41	3540320	3543929	-	588	-	GO:0002376;GO:0008270;GO:0008270;GO:0008745;GO:0008745;GO:0009253;GO:0009253;GO:0042834;GO:0042834;GO:0045087;GO:0045087;GO:0045087;	-	-	-	-	-	-
BGIBMGA001583	414.644	557.238	272.051	0.488213	-1.03442	5.98456e-09	2.02924e-07	scaf7	6873483	6874217	+	735	-	-	-	-	-	-	-	-
BGIBMGA003802	110.946	170.666	51.2256	0.300152	-1.73624	6.21423e-09	2.09061e-07	scaf91	1550600	1553371	+	2679	-	GO:0004383;GO:0004383;GO:0004672;GO:0004672;GO:0004713;GO:0004713;GO:0005524;GO:0005524;GO:0006182;GO:0006468;GO:0006468;GO:0018108;	-	-	-	-	-	-
BGIBMGA010961	541.292	995.259	87.3244	0.0877403	-3.51062	6.64095e-09	2.22256e-07	scaf83	1374978	1376447	-	264	-	-	-	-	-	-	-	-
BGIBMGA010251	12892.1	17314.9	8469.22	0.489128	-1.03172	7.26332e-09	2.39969e-07	scaf15	3397188	3402331	+	738	-	GO:0005737;GO:0005737;GO:0006914;GO:0006914;GO:0006914;	-	-	-	-	-	-
BGIBMGA005788	150.638	222.902	78.3731	0.351603	-1.50798	7.84573e-09	2.57232e-07	scaf54	157357	157590	+	234	-	-	-	-	-	-	-	-
BGIBMGA000895	52.9579	92.8338	13.0819	0.140918	-2.82708	8.08342e-09	2.63017e-07	scaf1	11143401	11149906	-	2121	-	-	-	-	-	-	-	-
BGIBMGA013617	147.121	218.46	75.7812	0.346888	-1.52746	8.51037e-09	2.74827e-07	scaf78	483939	488725	+	690	-	GO:0016020;GO:0016021;GO:0016021;	-	-	-	-	-	-
BGIBMGA009656	389.951	525.133	254.769	0.485151	-1.04349	8.73533e-09	2.80685e-07	scaf27	3477032	3478681	-	1650	-	GO:0008270;GO:0008270;	-	-	-	-	-	101738020
BGIBMGA009238	876.452	1175.3	577.6	0.491447	-1.02489	1.07894e-08	3.36614e-07	scaf38	943936	954364	-	2082	-	-	-	-	-	-	-	-
BGIBMGA011612	229.966	323.304	136.627	0.422598	-1.24264	1.28526e-08	3.91504e-07	scaf16	5497538	5498367	-	765	-	-	-	-	-	-	-	-
BGIBMGA005170	133.091	199.618	66.5647	0.33346	-1.58441	1.32611e-08	4.02045e-07	scaf32	4186077	4195039	+	2241	-	GO:0005216;GO:0005216;GO:0005515;GO:0006811;GO:0006811;GO:0006811;GO:0016020;GO:0016020;GO:0016020;GO:0016021;GO:0016021;GO:0034220;GO:0055085;GO:0055085;	-	-	-	-	-	-
BGIBMGA008538	450.87	778.17	123.57	0.158796	-2.65476	1.35722e-08	4.10513e-07	scaf2	8825717	8840501	+	645	-	-	-	-	-	-	-	-
BGIBMGA001917	56.1831	94.7332	17.633	0.186134	-2.42559	1.40818e-08	4.24926e-07	scaf28	766146	772938	+	1479	-	GO:0005515;	-	-	-	-	-	-
BGIBMGA008146	13206.8	18080	8333.57	0.460927	-1.11739	1.47938e-08	4.43297e-07	scaf52	919601	925319	-	771	-	-	-	-	-	-	-	-
BGIBMGA006502	313.552	428.459	198.645	0.463627	-1.10896	1.51768e-08	4.53719e-07	scaf11	4278055	4284711	+	1131	-	GO:0004185;GO:0004185;GO:0006508;GO:0006508;	-	-	-	-	-	-
BGIBMGA012721	40.4259	71.7455	9.10632	0.126925	-2.97795	1.55595e-08	4.64084e-07	scaf93	1452803	1459827	-	714	-	GO:0005634;GO:0005634;GO:0006355;GO:0006355;	-	-	-	-	-	-
BGIBMGA004981	133.926	199.283	68.5688	0.344077	-1.5392	1.65684e-08	4.90768e-07	scaf65	952104	954337	+	2160	-	GO:0005515;	-	-	-	-	-	-
BGIBMGA013607	261.228	360.828	161.628	0.447936	-1.15864	1.956e-08	5.74101e-07	scaf78	9804	38500	-	2556	-	GO:0004601;GO:0004601;GO:0005506;GO:0005506;GO:0006979;GO:0006979;GO:0008610;GO:0008610;GO:0016020;GO:0016021;GO:0016021;GO:0016491;GO:0016491;GO:0020037;GO:0020037;GO:0046983;GO:0046983;GO:0055114;GO:0055114;GO:0098869;	-	-	-	-	-	-
BGIBMGA008978	59.6087	99.1068	20.1106	0.202919	-2.30103	2.2267e-08	6.46193e-07	scaf17	2264842	2267542	+	1119	-	GO:0005576;GO:0005576;GO:0005737;GO:0005737;	-	-	-	-	Putative neuropeptide precursor protein[Source:UniProtKB/Swiss-Prot;Acc:B9WZ56]	100301494
BGIBMGA005140	1053.9	1447.06	660.749	0.456615	-1.13095	2.41769e-08	6.98473e-07	scaf32	2441242	2445918	+	1143	-	GO:0003677;GO:0003677;GO:0003677;GO:0003700;GO:0003700;GO:0006355;GO:0006355;GO:0006357;GO:0006357;	K09031	-	-	-	-	101743155
BGIBMGA010073	81.0804	143.891	18.2698	0.12697	-2.97744	2.82611e-08	8.05961e-07	scaf45	1383931	1384780	+	294	-	-	-	-	-	-	-	-
BGIBMGA009586	348.911	468.024	229.797	0.490993	-1.02623	3.66317e-08	1.02164e-06	scaf103	540160	554123	-	3246	-	-	-	-	-	-	-	-
BGIBMGA005341	269.871	370.607	169.134	0.456371	-1.13172	3.74406e-08	1.04195e-06	scaf19	3432547	3433740	-	555	-	GO:0016020;GO:0016021;GO:0016021;	-	-	-	-	-	101740157
BGIBMGA002912	271.035	383.834	158.236	0.412251	-1.27841	3.90395e-08	1.0841e-06	scaf30	2731274	2745487	+	3396	-	-	-	-	-	-	-	-
BGIBMGA004062	491.029	658.56	323.497	0.491218	-1.02556	4.61124e-08	1.25615e-06	scaf36	196928	210787	+	1368	-	GO:0005975;GO:0005975;GO:0016301;GO:0016301;GO:0016310;GO:0016740;GO:0016773;GO:0016773;	-	-	-	-	-	-
BGIBMGA012374	61.5358	110.218	12.8533	0.116617	-3.10015	4.74549e-08	1.28999e-06	scaf82	1112929	1120958	-	1725	-	GO:0016614;GO:0016614;GO:0050660;GO:0050660;GO:0055114;GO:0055114;	-	-	-	-	-	-
BGIBMGA005717	1164.91	1579.16	750.649	0.475346	-1.07295	5.20187e-08	1.40222e-06	scaf120	50207	57254	-	1251	-	GO:0005737;GO:0005737;GO:0016787;GO:0016787;GO:0016810;GO:0016810;	-	-	-	-	-	-
BGIBMGA003091	134.219	197.505	70.9321	0.35914	-1.47738	5.33199e-08	1.43429e-06	scaf13	1448495	1452692	+	618	-	GO:0003779;GO:0003779;GO:0016192;GO:0016192;GO:0045010;GO:0045010;	-	-	-	-	-	-
BGIBMGA008362	79.8594	125.665	34.0538	0.270989	-1.8837	6.67418e-08	1.76948e-06	scaf2	3738261	3740810	-	699	-	GO:0016020;GO:0016021;GO:0016021;	-	-	-	-	-	-
BGIBMGA011277	328.067	460.167	195.967	0.425862	-1.23154	7.67066e-08	1.97868e-06	scaf12	1856161	1908680	-	10212	-	-	-	-	-	-	-	-
BGIBMGA003254	135.164	197.384	72.9444	0.369556	-1.43613	9.38433e-08	2.37092e-06	scaf73	257644	260854	+	252	-	-	-	-	-	-	-	-
BGIBMGA004418	139.799	203.592	76.0057	0.373324	-1.4215	9.75763e-08	2.46041e-06	scaf37	747756	748316	-	561	-	-	-	-	-	-	-	-
BGIBMGA000592	64.2806	103.614	24.9475	0.240774	-2.05425	1.08495e-07	2.70922e-06	scaf8	876572	877930	-	1359	-	GO:0004177;GO:0004177;GO:0005622;GO:0005622;GO:0005737;GO:0005737;GO:0006508;GO:0006508;GO:0008235;GO:0008235;GO:0019538;GO:0019538;GO:0030145;GO:0030145;	-	-	-	-	-	-
BGIBMGA004130	56.5595	93.237	19.8821	0.213242	-2.22943	1.21066e-07	2.98838e-06	scaf36	3387161	3391804	+	1071	-	GO:0016491;GO:0016491;GO:0055114;GO:0055114;	-	-	-	-	-	101742189
BGIBMGA011860	65.6915	105.795	25.5883	0.241868	-2.04771	1.41483e-07	3.45267e-06	scaf16	4572611	4580420	+	759	-	-	K00069	EC:1.1.1.141	-	-	-	101742233
BGIBMGA002877	957.818	1339.31	576.331	0.430321	-1.21652	1.51964e-07	3.69444e-06	scaf30	1284023	1287751	+	837	-	-	-	-	-	-	-	-
BGIBMGA010235	115.885	172.47	59.2992	0.343823	-1.54026	1.59309e-07	3.86263e-06	scaf15	2854372	2864321	+	2406	-	-	-	-	-	-	-	-
BGIBMGA002153	1661.27	2317.96	1004.58	0.433392	-1.20625	1.64231e-07	3.95536e-06	scaf64	2149395	2152397	-	525	-	-	-	-	-	-	-	-
BGIBMGA000538	2963.52	4418.31	1508.72	0.34147	-1.55017	1.66317e-07	3.99813e-06	scaf8	4633938	4636953	-	1380	-	GO:0016020;GO:0016021;GO:0016021;GO:0016021;GO:0055085;GO:0055085;	-	-	-	-	-	-
BGIBMGA000030	81.4367	129.505	33.3681	0.257658	-1.95647	1.69815e-07	4.07462e-06	scaf98	47871	59327	-	1524	-	GO:0005509;GO:0005509;GO:0016012;GO:0016012;GO:0016020;GO:0016020;GO:0016020;GO:0016021;GO:0016021;	-	-	-	-	-	-
BGIBMGA001904	219.023	302.455	135.591	0.4483	-1.15746	1.83278e-07	4.34105e-06	scaf28	746744	750782	-	840	-	-	-	-	-	-	-	101743244
BGIBMGA011320	59.7053	97.2223	22.1882	0.228222	-2.13149	1.89463e-07	4.47111e-06	scaf12	1517283	1522090	+	1515	-	GO:0005515;GO:0016020;GO:0016021;GO:0016021;	-	-	-	-	-	101746016
BGIBMGA002265	205.174	284.043	126.305	0.444668	-1.1692	2.02165e-07	4.71047e-06	scaf34	1475950	1481391	-	519	-	GO:0003779;GO:0003779;GO:0007010;GO:0007010;	-	-	-	-	-	-
BGIBMGA002187	479.131	722.587	235.674	0.326154	-1.61638	2.05697e-07	4.76691e-06	scaf64	1677927	1683316	+	771	NANOSO	GO:0003723;GO:0003723;GO:0003723;GO:0006417;GO:0006417;GO:0008270;GO:0008270;	K18741	-	-	-	Zinc finger protein NANOS-O[Source:UniProtKB/TrEMBL;Acc:A5LI39]	100101221
BGIBMGA003882	716.721	1027.49	405.948	0.395085	-1.33976	2.81663e-07	6.3448e-06	scaf72	100930	104692	+	1380	-	GO:0016020;GO:0016021;GO:0016021;	K14209	-	-	-	-	101741858
BGIBMGA003041	306.252	474.039	138.464	0.292094	-1.77549	2.98193e-07	6.70544e-06	scaf13	2784853	2790408	-	2988	-	GO:0006355;GO:0006355;	-	-	-	-	-	-
BGIBMGA013099	426.439	578.978	273.9	0.473075	-1.07986	3.07995e-07	6.88978e-06	scaf4	8885497	8891720	+	756	-	GO:0005759;GO:0005759;GO:0006974;GO:0006974;GO:1902445;GO:1902445;	-	-	-	-	-	-
BGIBMGA002368	211.676	291.051	132.301	0.454563	-1.13745	3.26003e-07	7.27997e-06	scaf248	2860	4292	+	360	-	GO:0005615;GO:0005615;	-	-	-	-	-	-
BGIBMGA009825	202.212	279.441	124.982	0.447258	-1.16082	3.28071e-07	7.31348e-06	scaf51	2582891	2586037	-	1074	-	GO:0005515;	-	-	-	-	-	-
BGIBMGA001034	80.8149	125.09	36.5396	0.292106	-1.77544	4.23885e-07	9.32041e-06	scaf1	4170683	4171693	-	1011	-	-	-	-	-	-	-	101740370
BGIBMGA011702	679.633	1038.77	320.493	0.30853	-1.69652	4.34431e-07	9.53601e-06	scaf16	1158684	1169081	-	714	-	-	-	-	-	-	-	-
BGIBMGA002264	292.705	390.409	195	0.499476	-1.00151	4.53614e-07	9.92328e-06	scaf34	1485780	1489947	-	654	-	-	-	-	-	-	-	-
BGIBMGA009168	78.8652	127.473	30.2578	0.237367	-2.07481	4.66976e-07	1.0181e-05	scaf96	1443573	1457855	+	2757	-	-	-	-	-	-	-	-
BGIBMGA006138	104.126	155.006	53.246	0.34351	-1.54157	4.82263e-07	1.04965e-05	scaf5	3671943	3673818	+	474	-	GO:0003714;GO:0003714;GO:0004672;GO:0004672;GO:0005524;GO:0005524;GO:0006468;GO:0006468;GO:1903507;	-	-	-	-	-	-
BGIBMGA011703	1493.9	2255.06	732.75	0.324937	-1.62177	5.48405e-07	1.1699e-05	scaf16	1122511	1130992	-	741	-	-	-	-	-	-	-	-
BGIBMGA003683	61.3344	97.8356	24.8332	0.253826	-1.97809	5.63273e-07	1.19765e-05	scaf9	4108597	4120435	+	1251	-	GO:0005506;GO:0005506;GO:0016705;GO:0016705;GO:0020037;GO:0020037;GO:0055114;GO:0055114;	-	-	-	-	-	-
BGIBMGA003213	118.451	173.395	63.5075	0.36626	-1.44906	5.66185e-07	1.20053e-05	scaf73	1895671	1901107	-	4902	-	-	-	-	-	-	-	-
BGIBMGA001859	98.8572	147.811	49.9031	0.337614	-1.56655	5.66489e-07	1.20053e-05	scaf28	3008256	3091445	-	12462	-	GO:0003777;GO:0003777;GO:0005524;GO:0005524;GO:0007018;GO:0007018;GO:0016887;GO:0016887;GO:0030286;GO:0030286;	-	-	-	-	-	-
BGIBMGA014253	43.2856	73.2567	13.3146	0.181752	-2.45995	5.74511e-07	1.21553e-05	scaf80	123643	127493	-	528	-	-	-	-	-	-	-	-
BGIBMGA004790	219.035	299.593	138.476	0.462215	-1.11336	5.83451e-07	1.23242e-05	scaf46	2663992	2681786	-	1038	-	GO:0000166;GO:0004672;GO:0004672;GO:0004674;GO:0004674;GO:0005524;GO:0005524;GO:0005524;GO:0006468;GO:0006468;	-	-	-	-	-	-
BGIBMGA008854	1429.05	2029.77	828.324	0.408088	-1.29305	6.1036e-07	1.28295e-05	scaf17	5443261	5443752	-	492	-	-	-	-	-	-	-	-
BGIBMGA007610	234.45	318.199	150.701	0.473607	-1.07824	7.16786e-07	1.48485e-05	scaf3	9524922	9527026	-	558	-	GO:0005509;GO:0005509;GO:0016020;GO:0016021;GO:0016021;	-	-	-	-	-	-
BGIBMGA002154	558.816	766.572	351.061	0.457962	-1.1267	7.56074e-07	1.54881e-05	scaf64	2133463	2138845	-	618	-	-	-	-	-	-	-	-
BGIBMGA004474	252.043	399.325	104.761	0.262346	-1.93045	7.92669e-07	1.61351e-05	scaf37	2264910	2265779	+	870	-	GO:0005576;GO:0005576;	-	-	-	-	-	101737529
BGIBMGA000368	138.113	197.106	79.1201	0.40141	-1.31685	8.89118e-07	1.78169e-05	scaf18	278276	286911	+	1554	DIB	GO:0004497;GO:0004497;GO:0004497;GO:0005506;GO:0005506;GO:0016491;GO:0016705;GO:0016705;GO:0020037;GO:0020037;GO:0046872;GO:0055114;GO:0055114;GO:0055114;	K10721	-	-	-	Cyp302a1; Cytochrome P450[Source:UniProtKB/TrEMBL;Acc:Q4W6L7]	692499
BGIBMGA006799	73.8771	128.619	19.1351	0.148773	-2.74881	9.72876e-07	1.93151e-05	scaf70	1905474	1945501	-	3333	-	GO:0000166;GO:0004383;GO:0004383;GO:0004672;GO:0004672;GO:0005524;GO:0005524;GO:0005622;GO:0005622;GO:0006182;GO:0006468;GO:0006468;GO:0009190;GO:0009190;GO:0016020;GO:0016021;GO:0016021;GO:0016829;GO:0016849;GO:0016849;GO:0035556;GO:0035556;	-	-	-	-	-	-
BGIBMGA003239	198.451	272.087	124.815	0.458732	-1.12428	9.95365e-07	1.97312e-05	scaf73	352653	355973	-	429	-	-	-	-	-	-	-	-
BGIBMGA003715	243.574	332.656	154.493	0.464424	-1.10649	1.10512e-06	2.16734e-05	scaf9	6001579	6011854	+	1494	ACHRA7	GO:0004888;GO:0004888;GO:0005216;GO:0005216;GO:0005230;GO:0005230;GO:0005886;GO:0006811;GO:0006811;GO:0006811;GO:0016020;GO:0016021;GO:0016021;GO:0016021;GO:0022848;GO:0022848;GO:0030054;GO:0030054;GO:0034220;GO:0034220;GO:0045202;GO:0045211;GO:0045211;GO:0045211;GO:0060078;GO:0060079;	K05312	-	-	-	Nicotinic acetylcholine receptor subunit alpha 7[Source:UniProtKB/TrEMBL;Acc:A8CGM5]	100126156
BGIBMGA003658	235.765	318.074	153.456	0.482455	-1.05153	1.11886e-06	2.18763e-05	scaf9	2992189	2994985	+	1011	-	GO:0016491;GO:0016491;GO:0055114;	K00078	-	-	-	-	101744141
BGIBMGA000981	80.6194	123.434	37.8049	0.306276	-1.70709	1.39414e-06	2.62928e-05	scaf1	7187070	7201251	-	3783	-	GO:0003676;GO:0003676;GO:0016020;GO:0016021;GO:0016021;GO:0046872;GO:0046872;	-	-	-	-	-	-
BGIBMGA005418	7463.49	11238.3	3688.67	0.328223	-1.60725	1.39575e-06	2.62928e-05	scaf19	840197	847409	+	2034	-	GO:0006629;GO:0016020;GO:0016021;GO:0016021;GO:0016042;GO:0016042;GO:0016787;GO:0016787;	-	-	-	-	-	101743473
BGIBMGA004334	790.069	1081.36	498.778	0.46125	-1.11638	1.46959e-06	2.76031e-05	scaf79	1025725	1035416	+	1329	-	-	-	-	-	-	-	-
BGIBMGA003947	158.763	221.015	96.5123	0.436678	-1.19536	1.57843e-06	2.91795e-05	scaf105	202402	221084	-	2343	-	GO:0005515;	-	-	-	-	-	-
BGIBMGA002876	301.36	442.708	160.012	0.361439	-1.46818	1.61435e-06	2.9758e-05	scaf30	1263115	1279868	+	1461	-	GO:0004222;GO:0004222;GO:0006508;GO:0006508;GO:0008237;GO:0008237;GO:0016020;GO:0016021;GO:0016021;GO:0046872;	-	-	-	-	-	-
BGIBMGA008961	180.034	247.988	112.08	0.451958	-1.14574	1.68146e-06	3.09067e-05	scaf17	1497293	1499543	+	624	-	GO:0003676;GO:0003676;GO:0003677;GO:0003677;	-	-	-	-	-	101741784
BGIBMGA007563	485.887	695.348	276.426	0.397537	-1.33084	1.76448e-06	3.20882e-05	scaf66	520744	521298	+	555	-	-	-	-	-	-	-	-
BGIBMGA004535	452.52	673.856	231.185	0.343077	-1.54339	1.76558e-06	3.20882e-05	scaf97	1035659	1036427	+	186	-	-	-	-	-	-	-	-
BGIBMGA001498	78.5527	119.019	38.0865	0.320004	-1.64384	2.03516e-06	3.65224e-05	scaf7	642053	658676	+	1671	-	GO:0005215;GO:0005215;GO:0016020;GO:0016021;GO:0016021;GO:0016021;GO:0055085;GO:0055085;	K06258	-	-	-	-	101745246
BGIBMGA000379	80.2912	121.226	39.3559	0.324648	-1.62305	2.19466e-06	3.91666e-05	scaf18	1047681	1089336	+	4797	-	GO:0005089;GO:0005089;GO:0005515;GO:0007165;GO:0007165;GO:0035023;GO:0035023;	-	-	-	-	-	-
BGIBMGA010757	535.844	738.288	333.399	0.451584	-1.14694	2.64087e-06	4.64859e-05	scaf25	912618	926854	-	2004	-	-	-	-	-	-	-	101746596
BGIBMGA006306	87.451	130.587	44.3152	0.339355	-1.55913	2.65505e-06	4.65352e-05	scaf49	944974	954022	+	3345	-	GO:0005576;GO:0005576;GO:0005615;GO:0005615;	-	-	-	-	-	-
BGIBMGA007724	373.753	623.21	124.297	0.199446	-2.32593	2.72078e-06	4.74511e-05	scaf3	1599886	1605672	-	1737	-	GO:0005315;GO:0005315;GO:0006817;GO:0006817;GO:0006817;GO:0016020;GO:0016020;GO:0016020;GO:0016021;GO:0016021;GO:0055085;	-	-	-	-	-	-
BGIBMGA000687	90.9685	148.108	33.8293	0.22841	-2.1303	2.87961e-06	4.99378e-05	scaf8	4626664	4629813	+	963	-	GO:0016020;GO:0016020;GO:0016020;GO:0016021;GO:0016021;GO:0022857;GO:0022857;GO:0055085;GO:0055085;	-	-	-	-	-	-
BGIBMGA010362	237.165	316.486	157.844	0.49874	-1.00364	3.34484e-06	5.6783e-05	scaf6	8035456	8040341	-	1755	-	-	-	-	-	-	-	-
BGIBMGA013818	13655.4	18363.1	8947.76	0.487268	-1.03721	3.86848e-06	6.48185e-05	scaf62	1863420	1867877	-	1713	-	-	-	-	-	-	-	-
BGIBMGA013539	85.6571	141.983	29.3312	0.206583	-2.27521	4.03029e-06	6.70069e-05	scaf101	1210436	1212800	+	411	-	GO:0046983;GO:0046983;	K09091	-	-	-	-	105841640
BGIBMGA003800	338.081	476.991	199.172	0.417558	-1.25995	4.1432e-06	6.85304e-05	scaf91	1513613	1528201	+	1863	-	GO:0004383;GO:0004383;GO:0004672;GO:0004672;GO:0004713;GO:0004713;GO:0005524;GO:0005524;GO:0006182;GO:0006468;GO:0006468;GO:0016020;GO:0016021;GO:0016021;GO:0018108;	-	-	-	-	-	-
BGIBMGA002793	103.028	149.524	56.5318	0.378079	-1.40324	4.41697e-06	7.26854e-05	scaf30	2773007	2775298	-	1542	-	GO:0003756;GO:0003756;GO:0005783;GO:0005783;GO:0016671;GO:0016671;GO:0055114;GO:0055114;	-	-	-	-	-	-
BGIBMGA011796	195.369	264.649	126.088	0.476436	-1.06965	4.49669e-06	7.37148e-05	scaf16	1758579	1763359	+	708	-	-	-	-	-	-	-	-
BGIBMGA006070	23.1468	41.8567	4.43683	0.106	-3.23786	4.54235e-06	7.43687e-05	scaf5	492443	499787	-	939	-	GO:0005623;GO:0005623;GO:0045454;GO:0045454;	-	-	-	-	-	-
BGIBMGA005015	197.164	337.514	56.8135	0.168329	-2.57064	4.7393e-06	7.72111e-05	scaf32	4031816	4050823	-	1311	-	GO:0004497;GO:0004499;GO:0004499;GO:0016491;GO:0050660;GO:0050660;GO:0050661;GO:0050661;GO:0055114;GO:0055114;GO:0055114;	-	-	-	-	-	-
BGIBMGA002467	71.6185	108.722	34.515	0.317461	-1.65535	4.74592e-06	7.72111e-05	scaf14	1260394	1268844	+	741	-	-	-	-	-	-	-	-
BGIBMGA009942	89.1218	131.336	46.9071	0.357152	-1.48539	5.39614e-06	8.61577e-05	scaf137	327743	332712	+	2412	-	-	-	-	-	-	-	-
BGIBMGA000681	178.119	269.636	86.6018	0.321181	-1.63854	5.45422e-06	8.69772e-05	scaf8	4319191	4320840	+	1470	-	-	-	-	-	-	-	-
BGIBMGA013661	206.412	275.859	136.966	0.496508	-1.01011	6.01425e-06	9.48471e-05	scaf162	232979	238508	+	3228	-	-	-	-	-	-	-	-
BGIBMGA012453	1035.6	1398.25	672.945	0.481277	-1.05506	6.09326e-06	9.58628e-05	scaf56	2204487	2207542	-	1317	-	GO:0004888;GO:0004888;GO:0004930;GO:0004930;GO:0007166;GO:0007166;GO:0007186;GO:0007186;GO:0016020;GO:0016021;GO:0016021;GO:0016021;	-	-	-	-	-	-
BGIBMGA003728	116.676	186.162	47.1888	0.253482	-1.98005	6.59267e-06	0.000102222	scaf9	6525025	6530932	+	486	-	-	-	-	-	-	-	101736330
BGIBMGA000411	125.837	192.145	59.5278	0.309806	-1.69056	7.34251e-06	0.000112861	scaf18	2400976	2405022	+	759	-	GO:0005576;GO:0005576;GO:0052689;GO:0052689;	-	-	-	-	-	-
BGIBMGA011291	76.6538	114.299	39.009	0.34129	-1.55093	8.46744e-06	0.000128659	scaf12	1222673	1236042	-	2169	-	GO:0004114;GO:0004114;GO:0005515;GO:0007165;GO:0007165;GO:0008081;GO:0008081;GO:0016787;GO:0046872;GO:0046872;	-	-	-	-	-	-
BGIBMGA010994	150.054	207.494	92.6143	0.446347	-1.16376	9.16306e-06	0.000137606	scaf83	671131	671628	+	390	-	GO:0016020;GO:0016021;GO:0016021;	-	-	-	-	-	-
BGIBMGA008419	82.8404	122.631	43.0499	0.351053	-1.51024	9.21509e-06	0.000138066	scaf2	682499	685542	+	339	-	GO:0016020;GO:0016021;GO:0016021;	-	-	-	-	-	-
BGIBMGA009357	127.527	178.302	76.7527	0.430465	-1.21603	9.56472e-06	0.000142806	scaf53	264276	275471	+	1524	-	GO:0005515;	-	-	-	-	-	-
BGIBMGA013456	157.599	216.306	98.8919	0.457185	-1.12915	1.00681e-05	0.000149059	scaf111	13579	17910	-	795	-	GO:0016020;GO:0016021;GO:0016021;	-	-	-	-	-	-
BGIBMGA005952	128.744	179.238	78.2507	0.436574	-1.1957	1.19855e-05	0.00017331	scaf5	7153045	7174834	-	849	-	GO:0000166;GO:0004672;GO:0004672;GO:0004674;GO:0004674;GO:0004674;GO:0005524;GO:0005524;GO:0005524;GO:0006468;GO:0006468;GO:0016301;GO:0016310;GO:0016740;	-	-	-	-	-	-
BGIBMGA008349	77.1455	114.645	39.6457	0.345813	-1.53194	1.24045e-05	0.000178584	scaf2	4250477	4251715	-	1239	-	-	-	-	-	-	-	-
BGIBMGA012210	31.953	54.0528	9.85327	0.18229	-2.4557	1.27241e-05	0.000182167	scaf75	1629770	1646915	+	2226	-	-	-	-	-	-	-	-
BGIBMGA002932	142.887	197.144	88.6305	0.449573	-1.15337	1.28602e-05	0.000183503	scaf30	3972819	3975674	+	780	-	GO:0016020;GO:0016021;GO:0016021;GO:0016491;GO:0016491;GO:0055114;GO:0055114;	-	-	-	-	-	-
BGIBMGA003851	110.841	157.48	64.2014	0.40768	-1.29449	1.44481e-05	0.000202351	scaf72	1473937	1483913	-	1749	-	GO:0005216;GO:0005216;GO:0005244;GO:0005249;GO:0005249;GO:0005267;GO:0006811;GO:0006811;GO:0006811;GO:0006813;GO:0006813;GO:0006813;GO:0008076;GO:0008076;GO:0016020;GO:0016020;GO:0016020;GO:0016021;GO:0034765;GO:0034765;GO:0051260;GO:0051260;GO:0055085;GO:0055085;GO:0071805;	-	-	-	-	-	-
BGIBMGA005091	54.8308	85.1713	24.4903	0.287542	-1.79815	1.57663e-05	0.000218268	scaf32	414961	444746	-	1677	-	GO:0004252;GO:0004252;GO:0006508;GO:0006508;	-	-	-	-	-	-
BGIBMGA003115	158.986	235.167	82.8059	0.352116	-1.50588	1.61685e-05	0.000222814	scaf13	2748472	2750388	+	1686	-	GO:0005576;GO:0005576;GO:0006030;GO:0006030;GO:0008061;GO:0008061;	-	-	-	-	-	101740021
BGIBMGA008575	81.9083	119.795	44.0213	0.367472	-1.44429	1.65366e-05	0.000227209	scaf85	1430966	1437705	-	2559	-	-	-	-	-	-	-	-
BGIBMGA004844	30.3804	51.5402	9.22061	0.178901	-2.48277	1.78141e-05	0.00024187	scaf46	639089	654538	+	2748	-	GO:0004930;GO:0004930;GO:0007186;GO:0016020;GO:0016020;GO:0016020;GO:0016021;GO:0016021;	-	-	-	-	-	-
BGIBMGA006869	234.706	325.12	144.293	0.443814	-1.17197	1.81925e-05	0.000245456	scaf70	1180002	1194887	+	795	-	GO:0016020;GO:0016020;GO:0016020;GO:0016021;GO:0016021;	-	-	-	-	-	-
BGIBMGA003589	115.693	161.948	69.4382	0.428768	-1.22173	2.07633e-05	0.000275809	scaf9	459032	461116	-	1362	-	-	-	-	-	-	-	101747185
BGIBMGA012467	301.654	408.173	195.135	0.478069	-1.06471	2.09532e-05	0.000277182	scaf56	1295846	1309166	-	2337	-	GO:0005515;GO:0007015;GO:0007015;GO:0007155;GO:0007155;	-	-	-	-	-	-
BGIBMGA005875	403.56	567.168	239.952	0.423071	-1.24103	2.10216e-05	0.000277523	scaf67	1578457	1601227	-	3366	-	GO:0000166;GO:0003774;GO:0003777;GO:0003777;GO:0005524;GO:0005524;GO:0005524;GO:0007018;GO:0007018;GO:0008017;GO:0008017;	-	-	-	-	-	-
BGIBMGA010812	52.6698	81.829	23.5107	0.287315	-1.79929	2.12885e-05	0.00028076	scaf25	2601494	2604918	+	1524	-	GO:0004553;GO:0004553;GO:0005975;GO:0005975;	-	-	-	-	-	-
BGIBMGA003217	79.953	117.093	42.8132	0.365635	-1.45153	2.16033e-05	0.00028433	scaf73	1537487	1541848	-	1551	-	GO:0003676;GO:0003676;	-	-	-	-	-	-
BGIBMGA002148	96.7031	154.054	39.3519	0.255441	-1.96894	2.28484e-05	0.000297676	scaf23	4589526	4616211	+	9339	-	GO:0003777;GO:0003777;GO:0005524;GO:0005524;GO:0007018;GO:0007018;GO:0016887;GO:0016887;GO:0030286;GO:0030286;	K10408	-	-	-	-	101738460
BGIBMGA012306	107.698	151.663	63.732	0.42022	-1.25078	2.4532e-05	0.000318323	scaf26	326377	335668	+	2034	-	-	-	-	-	-	-	-
BGIBMGA005300	115.549	162.227	68.8709	0.424535	-1.23605	2.59377e-05	0.000334541	scaf19	5419679	5437334	-	1515	-	GO:0006508;GO:0006751;GO:0006751;GO:0036374;GO:0036374;	-	-	-	-	-	-
BGIBMGA002156	4554.51	6276.78	2832.24	0.451225	-1.14808	2.68942e-05	0.000345496	scaf64	2125315	2127939	-	909	-	GO:0003700;GO:0003700;GO:0006355;GO:0006355;GO:0008270;GO:0008270;GO:0043565;GO:0043565;GO:0046872;	-	-	-	-	-	-
BGIBMGA003140	44.9348	75.0611	14.8085	0.197286	-2.34164	2.96914e-05	0.000378785	scaf13	3796947	3797477	+	285	-	-	-	-	-	-	-	-
BGIBMGA000357	57.3372	87.4738	27.2006	0.310957	-1.68521	3.13036e-05	0.000397778	scaf18	103721	105420	-	480	PTTH	-	-	-	-	-	Prothoracicotropic hormone P2K P6KProthoracicotropic hormone [Source:UniProtKB/Swiss-Prot;Acc:P17219]	-
BGIBMGA006745	75.5508	110.995	40.107	0.361341	-1.46857	3.15817e-05	0.000400916	scaf10	4836432	4840937	+	2130	-	GO:0005507;GO:0005507;GO:0016491;GO:0016491;GO:0016491;GO:0046872;GO:0055114;GO:0055114;GO:0055114;	-	-	-	-	-	-
BGIBMGA012466	149.325	208.339	90.3122	0.433487	-1.20594	3.39429e-05	0.000426272	scaf56	1309903	1328322	-	1704	-	-	-	-	-	-	-	-
BGIBMGA006578	30.4931	51.0187	9.96756	0.195371	-2.35571	3.4256e-05	0.000429366	scaf10	5339948	5343868	-	366	-	GO:0004888;GO:0004888;GO:0005216;GO:0005216;GO:0005230;GO:0005230;GO:0006811;GO:0006811;GO:0016021;GO:0016021;GO:0034220;GO:0034220;	-	-	-	-	-	-
BGIBMGA012765	389.855	531.447	248.263	0.467144	-1.09806	3.52971e-05	0.000440701	scaf4	8734595	8737487	-	2010	-	-	-	-	-	-	-	-
BGIBMGA013482	218.805	327.669	109.941	0.335525	-1.57551	3.64692e-05	0.000452779	scaf101	974145	1001671	-	2100	-	GO:0004601;GO:0004601;GO:0006979;GO:0006979;GO:0016020;GO:0016021;GO:0016021;GO:0020037;GO:0020037;GO:0055114;GO:0055114;GO:0098869;	-	-	-	-	-	-
BGIBMGA008524	101.608	149.909	53.3073	0.355598	-1.49168	3.64753e-05	0.000452779	scaf2	7430858	7447989	+	1776	-	GO:0003824;GO:0003824;GO:0008152;	-	-	-	-	-	101736671
BGIBMGA009592	49.9302	77.8436	22.0168	0.282834	-1.82197	3.76061e-05	0.000465471	scaf103	342124	345626	-	336	-	-	-	-	-	-	-	101745081
BGIBMGA000493	274.954	373.496	176.412	0.472326	-1.08214	3.79594e-05	0.000468722	scaf8	6869897	6871487	-	606	-	-	-	-	-	-	-	101736369
BGIBMGA002231	62.6665	101.071	24.2617	0.240046	-2.05862	3.83826e-05	0.000471458	scaf34	4108264	4123983	-	1419	-	GO:0005515;	-	-	-	-	-	-
BGIBMGA001424	41.1714	65.4608	16.882	0.257895	-1.95515	4.0333e-05	0.000490275	scaf7	4976559	4976897	-	339	-	-	-	-	-	-	-	-
BGIBMGA011228	1053.49	1559.34	547.653	0.351209	-1.5096	4.06634e-05	0.000493825	scaf12	3891903	3918977	-	3936	-	GO:0000166;GO:0005524;GO:0005524;GO:0005524;GO:0016020;GO:0016021;GO:0016021;GO:0016021;GO:0016887;GO:0016887;GO:0042626;GO:0042626;GO:0055085;GO:0055085;	-	-	-	-	-	-
BGIBMGA003040	556.152	827.678	284.627	0.343886	-1.54	4.13902e-05	0.00050158	scaf13	2842492	2842968	-	477	-	GO:0003677;GO:0003677;GO:0003677;GO:0005634;GO:0005634;	-	-	-	-	-	-
BGIBMGA005941	122.067	186.737	57.3972	0.307368	-1.70196	4.58028e-05	0.000551044	scaf5	7942791	7949769	-	798	-	GO:0016020;GO:0016021;GO:0016021;	-	-	-	-	-	-
BGIBMGA001255	131.359	179.851	82.8671	0.460754	-1.11793	4.59203e-05	0.000551943	scaf1	11332386	11334209	+	1824	-	GO:0000166;GO:0000166;GO:0005622;GO:0005622;GO:0009190;GO:0009190;GO:0016020;GO:0016021;GO:0016021;GO:0016829;GO:0016849;GO:0016849;GO:0035556;GO:0035556;	-	-	-	-	-	-
BGIBMGA010410	78.3088	113.229	43.3887	0.383194	-1.38385	5.28701e-05	0.000625263	scaf6	4584829	4593398	-	735	-	-	-	-	-	-	-	-
BGIBMGA006846	157.925	213.154	102.696	0.481794	-1.05351	5.87859e-05	0.000686102	scaf70	419038	429248	+	9168	-	GO:0005515;	-	-	-	-	-	-
BGIBMGA013574	24.3302	42.0316	6.62872	0.157708	-2.66467	5.91815e-05	0.000689122	scaf78	1291754	1303120	-	1278	-	GO:0016020;GO:0016021;GO:0016021;GO:0016021;GO:0022857;GO:0022857;GO:0055085;GO:0055085;	-	-	-	-	-	-
BGIBMGA010600	36.0326	58.0649	14.0003	0.241115	-2.05221	5.92052e-05	0.000689122	scaf234	17089	20491	+	678	-	GO:0005576;GO:0005576;GO:0052689;GO:0052689;	-	-	-	-	-	-
BGIBMGA008806	50.2371	83.2452	17.2289	0.206966	-2.27253	5.95073e-05	0.00069139	scaf134	68500	95325	-	5772	-	-	-	-	-	-	-	-
BGIBMGA010313	223.035	320.166	125.905	0.393248	-1.34649	7.22226e-05	0.000819902	scaf127	475001	480032	+	570	-	-	-	-	-	-	-	-
BGIBMGA011176	72.8956	105.86	39.9315	0.377211	-1.40655	7.45534e-05	0.000839703	scaf12	6443453	6446509	-	630	-	GO:0003779;GO:0003779;GO:0007015;GO:0007015;GO:0007049;	-	-	-	-	-	-
BGIBMGA012698	52.9853	80.5577	25.4128	0.315461	-1.66447	7.71685e-05	0.000865375	scaf69	562942	569901	+	1443	-	GO:0003677;GO:0003677;GO:0008270;GO:0008270;	-	-	-	-	-	-
BGIBMGA012451	1478.53	2133.39	823.683	0.386092	-1.37298	8.29175e-05	0.000919573	scaf56	2262218	2266020	-	651	-	GO:0005576;GO:0005576;	K19919	-	-	-	SCP-related protein[Source:UniProtKB/TrEMBL;Acc:Q152R4]	733073
BGIBMGA011752	35.1322	56.607	13.6574	0.241268	-2.05129	9.43696e-05	0.00102699	scaf16	357798	365343	+	1635	-	GO:0005515;	-	-	-	-	-	-
BGIBMGA003846	228.819	323.843	133.795	0.413146	-1.27528	9.58119e-05	0.0010418	scaf72	2001012	2004966	-	579	-	-	-	-	-	-	-	-
BGIBMGA004405	290.069	407.375	172.763	0.424088	-1.23757	9.64248e-05	0.00104758	scaf37	1533823	1534587	-	765	-	GO:0005576;GO:0005576;	-	-	-	-	-	101743208
BGIBMGA001562	11.7496	22.5195	0.979613	0.0435006	-4.52282	9.88303e-05	0.00106921	scaf7	5509681	5512808	+	261	-	GO:0007268;GO:0007268;GO:0019992;GO:0019992;	-	-	-	-	-	-
BGIBMGA014250	97.3578	135.882	58.8339	0.432979	-1.20763	0.000101395	0.00109512	scaf80	181535	195382	-	1449	-	-	-	-	-	-	-	-
BGIBMGA010374	150.236	201.343	99.1287	0.492338	-1.02228	0.000101772	0.00109826	scaf6	7405043	7406660	-	249	-	GO:0046872;GO:0046872;GO:0046872;	-	-	-	-	-	105842113
BGIBMGA009824	144.449	192.957	95.9408	0.497214	-1.00806	0.000101985	0.00109964	scaf51	2586360	2589281	-	672	-	GO:0005515;	-	-	-	-	-	-
BGIBMGA014606	478.833	645.373	312.292	0.483895	-1.04723	0.000102416	0.00110265	scaf583	84	1171	+	516	-	-	-	-	-	-	-	-
BGIBMGA006160	57.1595	85.1062	29.2129	0.343252	-1.54266	0.000102435	0.00110265	scaf5	5218232	5224116	+	1038	-	GO:0003824;GO:0003824;GO:0050662;GO:0050662;	-	-	-	-	-	-
BGIBMGA006381	30.4685	51.0838	9.85327	0.192885	-2.37419	0.000103391	0.00111201	scaf11	4092999	4098870	-	249	-	GO:0005576;GO:0005576;GO:0006030;GO:0006030;GO:0008061;GO:0008061;	-	-	-	-	-	-
BGIBMGA011266	22.6988	39.1159	6.28177	0.160594	-2.63851	0.000108535	0.00115767	scaf12	2400318	2405086	-	2244	SP1	-	-	-	-	-	Sex-specific storage-protein 1[Source:UniProtKB/Swiss-Prot;Acc:P09179]	-
BGIBMGA001563	24.2411	41.3352	7.1471	0.172906	-2.53194	0.000125181	0.00131757	scaf7	5539475	5542116	+	453	-	-	-	-	-	-	-	-
BGIBMGA002163	27.6037	45.8154	9.39204	0.204997	-2.28632	0.000126473	0.00132704	scaf64	1896803	1900218	-	1137	-	-	-	-	-	-	-	-
BGIBMGA014470	169.042	243.297	94.7857	0.389588	-1.35998	0.00013255	0.00137957	scaf261	16997	22942	+	3372	-	GO:0005509;GO:0005509;	-	-	-	-	-	-
BGIBMGA002293	43.204	67.1586	19.2494	0.286626	-1.80276	0.000132873	0.00138182	scaf34	435123	441066	+	1515	-	GO:0015929;GO:0015929;GO:0016020;GO:0016021;GO:0016021;	-	-	-	-	-	-
BGIBMGA014364	13.7125	25.4086	2.01637	0.0793578	-3.65548	0.000139331	0.00144431	scaf155	259463	278689	-	3720	-	GO:0003341;GO:0003341;GO:0003777;GO:0003777;GO:0005858;GO:0005858;GO:0007018;GO:0007018;GO:0016887;GO:0016887;	-	-	-	-	-	-
BGIBMGA007564	2791.08	3816.48	1765.67	0.462645	-1.11202	0.00014008	0.0014509	scaf66	535288	569257	+	2571	-	-	-	-	-	-	-	-
BGIBMGA007609	1286.74	1730.05	843.434	0.487519	-1.03647	0.000147778	0.00151723	scaf3	9527927	9545017	-	3969	-	GO:0005509;GO:0005509;	-	-	-	-	-	-
BGIBMGA013938	1731.88	2463.96	999.805	0.405771	-1.30126	0.000155549	0.00158564	scaf29	318459	319441	-	495	-	GO:0005634;GO:0005634;GO:0006950;GO:0051726;GO:0051726;	K04402	-	-	-	-	101742570
BGIBMGA009270	53.464	79.9029	27.0251	0.338224	-1.56395	0.000162935	0.00165439	scaf38	1549465	1550181	+	717	-	-	-	-	-	-	-	101740122
BGIBMGA002441	38.5163	60.3791	16.6534	0.275814	-1.85823	0.000165265	0.00167409	scaf14	774674	774946	-	273	-	-	-	-	-	-	-	-
BGIBMGA007766	454.148	764.828	143.468	0.187583	-2.4144	0.000196885	0.00195746	scaf3	43287	44423	+	1137	-	GO:0006629;GO:0006629;GO:0008081;GO:0008081;	-	-	-	-	-	101740291
BGIBMGA000378	19.2777	33.486	5.06949	0.151391	-2.72364	0.000198786	0.00197179	scaf18	987747	1017562	+	2340	-	-	-	-	-	-	-	-
BGIBMGA011644	48.2296	72.9485	23.5107	0.322292	-1.63356	0.000200217	0.00198446	scaf16	3329045	3336828	-	3030	-	GO:0060271;GO:0060271;GO:0090162;GO:0090162;GO:0097539;GO:0097539;	-	-	-	-	-	-
BGIBMGA013690	69.5759	99.6816	39.4702	0.395963	-1.33656	0.000214419	0.00210398	scaf160	55322	68788	+	1623	-	GO:0004888;GO:0004888;GO:0004890;GO:0004890;GO:0005216;GO:0005216;GO:0005230;GO:0005230;GO:0005886;GO:0005886;GO:0006811;GO:0006811;GO:0006811;GO:0016020;GO:0016020;GO:0016020;GO:0016021;GO:0016021;GO:0016021;GO:0034220;GO:0034220;	-	-	-	-	-	-
BGIBMGA000885	79.918	112.186	47.65	0.424741	-1.23534	0.000220824	0.00215391	scaf1	12092585	12097497	-	411	-	-	-	-	-	-	-	-
BGIBMGA006071	24.2263	40.787	7.66547	0.187939	-2.41166	0.000221898	0.00216275	scaf5	490389	492049	-	672	-	-	-	-	-	-	-	-
BGIBMGA011742	487.934	651.404	324.464	0.498099	-1.00549	0.0002257	0.00218986	scaf16	77441	79981	-	411	-	-	-	-	-	-	-	101745002
BGIBMGA012339	125.975	168.111	83.8385	0.498708	-1.00373	0.00023514	0.0022712	scaf26	2567395	2617096	+	6021	-	-	-	-	-	-	-	-
BGIBMGA007598	42.0698	64.6044	19.5351	0.30238	-1.72556	0.000250062	0.0023938	scaf3	9755739	9760895	-	1062	-	GO:0004888;GO:0004888;GO:0004890;GO:0004890;GO:0005216;GO:0005216;GO:0005230;GO:0005230;GO:0005886;GO:0005886;GO:0006811;GO:0006811;GO:0006811;GO:0016020;GO:0016020;GO:0016020;GO:0016021;GO:0016021;GO:0016021;GO:0034220;GO:0034220;	-	-	-	-	-	-
BGIBMGA004399	81.2266	121.946	40.507	0.332171	-1.59	0.000252645	0.00241136	scaf37	1633889	1634659	-	771	LP-C12	GO:0005576;GO:0005576;	-	-	-	-	Low molecular 30 kDa lipoprotein PBMHP-12[Source:UniProtKB/Swiss-Prot;Acc:P09335]	-
BGIBMGA006249	84.3226	117.762	50.8827	0.432079	-1.21063	0.000255185	0.0024302	scaf88	780442	781520	+	615	-	-	-	-	-	-	-	-
BGIBMGA002195	94.7674	130.868	58.6666	0.448287	-1.15751	0.000255375	0.00243021	scaf64	2178488	2180068	+	615	-	GO:0016020;GO:0016021;GO:0016021;	-	-	-	-	-	-
BGIBMGA001010	31.0868	50.0141	12.1594	0.24312	-2.04026	0.000263398	0.00249773	scaf1	5666627	5667932	-	726	-	GO:0005576;GO:0005576;GO:0006030;GO:0006030;GO:0008061;GO:0008061;	-	-	-	-	-	-
BGIBMGA007467	182.258	250.359	114.158	0.455976	-1.13297	0.000281043	0.00263363	scaf102	220856	221782	-	678	-	GO:0016533;GO:0016533;GO:0016534;GO:0016534;GO:0071902;	-	-	-	-	-	-
BGIBMGA006337	93.3434	128.314	58.3727	0.45492	-1.13631	0.000297748	0.0027677	scaf49	2340355	2346387	+	1224	-	-	-	-	-	-	-	-
BGIBMGA009488	112.815	159.368	66.2626	0.415785	-1.26609	0.000302316	0.002797	scaf40	621406	637293	+	1188	-	GO:0003993;GO:0003993;GO:0016311;	-	-	-	-	-	-
BGIBMGA013767	33.5564	53.4513	13.6615	0.255588	-1.96811	0.000311524	0.00286509	scaf47	115456	116945	-	231	-	-	-	-	-	-	-	-
BGIBMGA008373	16.0222	28.6442	3.40007	0.1187	-3.07461	0.00032926	0.00298979	scaf2	2811954	2816742	-	801	-	-	-	-	-	-	-	-
BGIBMGA008388	43.3193	65.8341	20.8045	0.316015	-1.66194	0.000381753	0.00337836	scaf2	1160837	1162441	-	858	-	-	-	-	-	-	-	101740013
BGIBMGA012231	35.558	55.2707	15.8452	0.286684	-1.80247	0.000382637	0.00338386	scaf26	4022650	4023967	-	1056	-	GO:0005515;	-	-	-	-	-	-
BGIBMGA001742	743.687	1069.54	417.829	0.390661	-1.35601	0.000394441	0.00347156	scaf35	849609	861673	+	1017	-	GO:0005484;GO:0005484;GO:0005622;GO:0005622;GO:0006886;GO:0006886;GO:0016020;GO:0016020;GO:0016192;GO:0016192;GO:0061025;	-	-	-	-	-	-
BGIBMGA002440	26.4468	43.1546	9.73899	0.225677	-2.14767	0.00040761	0.00356797	scaf14	792351	796956	-	1371	-	-	-	-	-	-	-	-
BGIBMGA004051	16.5002	29.1391	3.86131	0.132513	-2.91579	0.000409048	0.0035757	scaf36	152753	156479	-	1860	-	-	-	-	-	-	-	-
BGIBMGA003763	356.198	549.425	162.971	0.296621	-1.75331	0.000416793	0.00362129	scaf91	583928	592395	-	813	-	GO:0007165;GO:0007165;	-	-	-	-	-	101738478
BGIBMGA006494	83.0933	114.847	51.3399	0.447029	-1.16156	0.000428562	0.00370606	scaf11	4064790	4065068	+	279	-	GO:0003676;GO:0003676;GO:0003677;GO:0003677;	-	-	-	-	-	-
BGIBMGA000886	108.937	146.019	71.8546	0.492092	-1.023	0.000465944	0.00399181	scaf1	12017707	12022620	-	390	-	-	K19363	-	-	-	-	101740969
BGIBMGA003508	26.9915	43.7827	10.2002	0.232974	-2.10176	0.000477707	0.00408173	scaf9	4262335	4263076	-	432	-	-	-	-	-	-	-	101739838
BGIBMGA005143	19.6799	33.5393	5.82053	0.173544	-2.52663	0.000506956	0.00429181	scaf32	2645290	2646009	+	720	-	GO:0016020;GO:0016021;GO:0016021;	-	-	-	-	-	-
BGIBMGA007907	32.0204	50.269	13.7717	0.273961	-1.86796	0.000537074	0.00452301	scaf3	6056119	6061794	+	1881	-	GO:0005515;	-	-	-	-	-	-
BGIBMGA013128	31.1844	49.1727	13.1962	0.268365	-1.89773	0.000549551	0.00461	scaf124	167050	171851	-	4449	-	-	-	-	-	-	-	-
BGIBMGA005264	14.2004	25.4619	2.93884	0.115421	-3.11502	0.00055414	0.00464246	scaf58	218539	219159	-	297	-	-	-	-	-	-	-	-
BGIBMGA013163	90.6166	128.044	53.1889	0.415395	-1.26745	0.000555952	0.00465461	scaf39	2961971	2969064	-	552	BMORCPR56	GO:0042302;GO:0042302;GO:0042302;	-	-	-	-	Putative cuticle protein[Source:UniProtKB/TrEMBL;Acc:C0H6P8]	100379415
BGIBMGA013766	18.747	32.1348	5.3593	0.166776	-2.58402	0.000557228	0.00465621	scaf47	122963	126227	-	594	-	GO:0008017;GO:0008017;	-	-	-	-	-	-
BGIBMGA010963	22.7475	37.658	7.8369	0.208107	-2.2646	0.000600241	0.00496413	scaf83	1249402	1253591	-	1002	-	-	-	-	-	-	-	101745759
BGIBMGA003591	33.142	51.6469	14.637	0.283406	-1.81906	0.000607303	0.00500966	scaf9	424451	429635	-	408	-	-	-	-	-	-	-	-
BGIBMGA006542	23.4748	38.5944	8.35528	0.21649	-2.20763	0.000618291	0.00509378	scaf10	7258575	7259999	-	1425	-	-	-	-	-	-	-	-
BGIBMGA001905	27.7679	45.4539	10.0818	0.221804	-2.17264	0.000624496	0.00513854	scaf28	743112	745131	-	1113	-	GO:0003824;GO:0003824;GO:0005515;GO:0006518;GO:0006518;GO:0016020;GO:0016020;	K18200	EC:4.3.2.5	-	-	-	101742958
BGIBMGA006769	22.6043	37.8329	7.37567	0.194954	-2.3588	0.00063541	0.00520512	scaf10	6042951	6050173	+	1269	-	-	-	-	-	-	-	-
BGIBMGA012465	163.222	234.017	92.4265	0.394956	-1.34024	0.000635441	0.00520512	scaf56	1387596	1391399	-	3621	-	-	-	-	-	-	-	-
BGIBMGA003090	94.0378	127.511	60.5646	0.474975	-1.07408	0.000644891	0.00526913	scaf13	1295454	1295774	+	321	-	-	-	-	-	-	-	-
BGIBMGA009585	59.5478	84.9846	34.1109	0.401378	-1.31697	0.000677994	0.00548741	scaf103	556802	566460	-	1323	-	-	-	-	-	-	-	-
BGIBMGA005839	77.6066	117.359	37.8539	0.322547	-1.63242	0.000699949	0.00562272	scaf125	330328	332481	-	1389	-	GO:0005515;	-	-	-	-	-	101738213
BGIBMGA010164	1648.61	2465.72	831.5	0.337223	-1.56822	0.000703629	0.00564876	scaf15	1969190	1970416	-	1227	-	-	-	-	-	-	-	-
BGIBMGA009019	74.4887	103.225	45.752	0.443224	-1.17389	0.000756518	0.00598388	scaf17	4483296	4493666	+	1713	-	GO:0005272;GO:0005272;GO:0005272;GO:0006811;GO:0006814;GO:0006814;GO:0006814;GO:0016020;GO:0016020;GO:0016020;GO:0016021;GO:0016021;GO:0035725;	-	-	-	-	-	-
BGIBMGA002615	657.38	983.345	331.415	0.337029	-1.56906	0.000759783	0.00600233	scaf20	1952727	1965788	-	2001	-	GO:0003677;GO:0003677;GO:0003677;GO:0005634;GO:0005634;GO:0006338;	-	-	-	-	-	-
BGIBMGA002614	107.694	157.643	57.7441	0.366297	-1.44892	0.000772562	0.00609208	scaf20	2083206	2084669	-	162	-	-	-	-	-	-	-	-
BGIBMGA002442	51.4104	78.2734	24.5475	0.313612	-1.67295	0.000773865	0.00609863	scaf14	680838	683307	-	570	-	GO:0004930;GO:0004930;GO:0004930;GO:0007165;GO:0007186;GO:0007186;GO:0007186;GO:0016020;GO:0016021;GO:0016021;GO:0016021;	-	-	-	-	-	-
BGIBMGA009522	33.1476	54.4826	11.8125	0.216812	-2.20548	0.000794479	0.00622301	scaf40	2317300	2337538	+	1104	-	GO:0005506;GO:0005506;GO:0016705;GO:0016705;GO:0020037;GO:0020037;GO:0055114;GO:0055114;	-	-	-	-	-	-
BGIBMGA012562	80.948	111.356	50.5399	0.453858	-1.13969	0.000798767	0.00624298	scaf77	675405	688802	+	1008	-	GO:0004888;GO:0004888;GO:0005216;GO:0005216;GO:0005230;GO:0005230;GO:0005886;GO:0006811;GO:0006811;GO:0006811;GO:0016020;GO:0016021;GO:0016021;GO:0016021;GO:0022848;GO:0022848;GO:0030054;GO:0030054;GO:0034220;GO:0034220;GO:0045202;GO:0045211;GO:0045211;GO:0045211;GO:0060078;GO:0060079;	-	-	-	-	-	-
BGIBMGA009879	97.4378	130.107	64.7687	0.497812	-1.00633	0.000999257	0.00756488	scaf51	580672	584555	+	927	-	GO:0003723;GO:0003723;GO:0005515;	-	-	-	-	-	-
BGIBMGA008598	38.4875	57.9582	19.0167	0.328111	-1.60774	0.00102817	0.00774282	scaf85	441603	442907	+	1305	-	-	-	-	-	-	-	101738207
BGIBMGA011831	9.14396	17.2512	1.03676	0.0600977	-4.05655	0.00111356	0.00826987	scaf16	2991985	3005991	+	2415	-	GO:0006811;GO:0006812;GO:0006812;GO:0006814;GO:0006814;GO:0006814;GO:0006885;GO:0006885;GO:0015297;GO:0015299;GO:0015299;GO:0015385;GO:0015385;GO:0016020;GO:0016021;GO:0016021;GO:0016021;GO:0035725;GO:0055085;GO:0055085;GO:1902600;	-	-	-	-	Sodium/hydrogen exchanger[Source:UniProtKB/TrEMBL;Acc:H9JQM5]	-
BGIBMGA012150	36.3702	54.9359	17.8045	0.324095	-1.62551	0.00111741	0.00828891	scaf75	1120735	1122997	-	264	-	-	-	-	-	-	-	-
BGIBMGA005320	368.331	504.542	232.119	0.460059	-1.12011	0.00112052	0.00830719	scaf19	4460757	4466564	-	852	-	GO:0004181;GO:0004181;GO:0006508;GO:0006508;GO:0008270;GO:0008270;	-	-	-	-	-	-
BGIBMGA002196	27.0855	42.8197	11.3513	0.265094	-1.91542	0.00114918	0.00848062	scaf64	2180636	2180869	+	234	-	-	-	-	-	-	-	-
BGIBMGA005982	14.2388	25.0204	3.45722	0.138176	-2.85542	0.00117277	0.00863496	scaf5	5722928	5727338	-	1770	-	GO:0005509;GO:0005509;	-	-	-	-	-	-
BGIBMGA005321	288.997	399.403	178.592	0.447147	-1.16118	0.00118327	0.00870229	scaf19	4455585	4457882	-	261	-	-	-	-	-	-	-	-
BGIBMGA012031	14.195	25.047	3.34293	0.133466	-2.90546	0.00118608	0.00871796	scaf24	3754558	3758752	-	1623	AE13	-	-	-	-	-	Carboxylesterase[Source:UniProtKB/TrEMBL;Acc:Q2F622]	692864
BGIBMGA003210	40.1424	59.8843	20.4004	0.340664	-1.55358	0.00118964	0.00872922	scaf13	6354391	6356823	+	2433	-	GO:0000943;GO:0000943;GO:0003676;GO:0003676;GO:0008270;GO:0008270;GO:0015074;GO:0015074;	-	-	-	-	-	-
BGIBMGA012315	57.5868	87.8588	27.3149	0.310895	-1.6855	0.00121937	0.00893211	scaf26	631511	636967	+	2154	-	GO:0003676;GO:0003676;GO:0008270;GO:0008270;GO:0046872;	-	-	-	-	-	-
BGIBMGA008657	57.7643	81.589	33.9395	0.415981	-1.26541	0.00125707	0.00915104	scaf132	575927	576373	+	375	-	-	-	-	-	-	-	-
BGIBMGA013290	85.2108	114.873	55.5481	0.483559	-1.04824	0.00132031	0.00954133	scaf71	1753620	1761667	-	1074	-	GO:0016020;GO:0016021;GO:0016021;	-	-	-	-	-	-
BGIBMGA003099	71.2141	98.3987	44.0295	0.447461	-1.16017	0.00132115	0.00954206	scaf13	2122871	2163775	+	1626	-	GO:0004114;GO:0004114;GO:0007165;GO:0007165;GO:0008081;GO:0008081;GO:0016787;GO:0046872;GO:0046872;	-	-	-	-	-	-
BGIBMGA010500	21.5942	35.2371	7.95119	0.225648	-2.14785	0.00132907	0.00958847	scaf6	268812	278566	+	1590	-	GO:0042302;GO:0042302;GO:0042302;	-	-	-	-	-	-
BGIBMGA010346	41.9077	61.9169	21.8984	0.353674	-1.49951	0.00134172	0.00965274	scaf109	689753	708649	+	906	-	GO:0016020;GO:0016021;GO:0016021;	-	-	-	-	-	-
BGIBMGA001891	59.6183	84.8929	34.3436	0.404552	-1.3056	0.00135207	0.00971634	scaf28	1733256	1736620	-	1257	-	GO:0004180;GO:0004180;GO:0004181;GO:0004181;GO:0006508;GO:0006508;GO:0008270;GO:0008270;	-	-	-	-	-	-
BGIBMGA005566	43.9854	66.7704	21.2004	0.317512	-1.65512	0.00138266	0.00990858	scaf33	1967640	1969175	-	771	-	-	-	-	-	-	-	-
BGIBMGA001013	24.357	39.0892	9.6247	0.246224	-2.02196	0.0014047	0.0100609	scaf1	5592649	5596393	-	1083	-	GO:0000166;GO:0004672;GO:0004672;GO:0004674;GO:0004674;GO:0005524;GO:0005524;GO:0005524;GO:0006468;GO:0006468;	-	-	-	-	-	-
BGIBMGA006435	64.378	89.5715	39.1845	0.437466	-1.19276	0.00148752	0.0105544	scaf11	770939	774022	-	483	-	-	-	-	-	-	-	-
BGIBMGA009369	43.0314	63.0133	23.0495	0.365788	-1.45092	0.00154241	0.0108769	scaf53	1490029	1495432	+	753	-	-	-	-	-	-	-	101738382
BGIBMGA014139	30.5281	47.4599	13.5962	0.286478	-1.80351	0.00155443	0.0109387	scaf99	1266329	1282590	-	1848	-	GO:0000166;GO:0000166;GO:0009166;GO:0009166;GO:0016787;GO:0016787;GO:0016787;	-	-	-	-	-	-
BGIBMGA000530	30.7112	47.2466	14.1758	0.300039	-1.73678	0.00158015	0.0110654	scaf8	4928410	4941126	-	1086	-	GO:0016020;GO:0016021;GO:0016021;GO:0016021;	-	-	-	-	-	-
BGIBMGA011679	58.9732	92.4723	25.474	0.275477	-1.85999	0.0015829	0.0110726	scaf16	1730307	1730833	-	438	-	-	-	-	-	-	-	-
BGIBMGA006214	383.903	605.248	162.559	0.268582	-1.89657	0.00161379	0.0112642	scaf5	8132104	8137598	+	1731	-	GO:0003824;GO:0003824;GO:0005515;GO:0005576;GO:0005576;GO:0005975;GO:0005975;GO:0006030;GO:0006030;GO:0008061;GO:0008061;	-	-	-	-	-	-
BGIBMGA002286	22.5615	36.535	8.58794	0.235061	-2.0889	0.00165138	0.0114707	scaf34	442509	450494	-	3354	-	GO:0005267;GO:0005267;GO:0006811;GO:0016020;GO:0016020;GO:0016020;GO:0016021;GO:0016021;GO:0071805;GO:0071805;	-	-	-	-	-	-
BGIBMGA011260	17.868	29.9155	5.82053	0.194566	-2.36167	0.00174321	0.0119857	scaf12	2655605	2662546	-	2262	-	GO:0004970;GO:0004970;GO:0005234;GO:0005886;GO:0005886;GO:0006811;GO:0016020;GO:0016020;GO:0016020;GO:0016021;GO:0016021;GO:0035235;GO:0098794;	-	-	-	-	-	-
BGIBMGA011832	7.35835	14.2555	0.461235	0.032355	-4.94987	0.00184378	0.0126099	scaf16	3007127	3009150	+	783	-	-	-	-	-	-	-	-
BGIBMGA007829	34.6322	51.8068	17.4575	0.336973	-1.56929	0.00190032	0.0129417	scaf3	2498958	2504482	+	1101	-	GO:0016020;GO:0016021;GO:0016021;	-	-	-	-	-	-
BGIBMGA011740	29.3612	45.5222	13.2003	0.289975	-1.786	0.00192755	0.0131132	scaf16	149609	155743	-	513	-	GO:0006887;GO:0006887;GO:0016020;GO:0016020;GO:0017137;GO:0017137;GO:0048786;GO:0048786;	-	-	-	-	-	-
BGIBMGA000245	30.0945	46.0703	14.1187	0.306459	-1.70623	0.00208475	0.0139979	scaf18	3596471	3600742	-	513	BMORCPR130	GO:0042302;GO:0042302;GO:0042302;	-	-	-	-	Putative cuticle protein[Source:UniProtKB/TrEMBL;Acc:C0H6X2]	100379349
BGIBMGA003530	4254.45	6342.09	2166.82	0.341657	-1.54938	0.00209003	0.0140074	scaf9	3162419	3164333	-	888	-	-	-	-	-	-	-	-
BGIBMGA012146	32.2939	48.9711	15.6167	0.318895	-1.64884	0.00211894	0.014161	scaf75	1263275	1273259	-	915	BMORCPR48	GO:0042302;GO:0042302;GO:0042302;	-	-	-	-	Putative cuticle protein[Source:UniProtKB/TrEMBL;Acc:C0H6P0]	100379423
BGIBMGA003478	131.329	175.522	87.1366	0.496441	-1.0103	0.0022014	0.0146206	scaf9	6248419	6260451	-	954	-	GO:0003700;GO:0006357;	-	-	-	-	-	-
BGIBMGA005481	22.1274	35.7853	8.46957	0.236677	-2.07901	0.00227526	0.0150265	scaf19	4305876	4306670	+	612	-	GO:0005515;	-	-	-	-	-	-
BGIBMGA010420	27.2155	42.2716	12.1594	0.287651	-1.79761	0.00228388	0.0150544	scaf6	3797137	3802257	-	1029	-	GO:0003676;GO:0003676;	-	-	-	-	-	-
BGIBMGA011683	34.2326	50.9505	17.5147	0.343758	-1.54053	0.00241016	0.0157639	scaf16	1500150	1508105	-	1272	-	GO:0000166;GO:0000166;GO:0016020;GO:0016021;GO:0016021;	-	-	-	-	-	-
BGIBMGA012135	38.5759	56.8086	20.3433	0.358103	-1.48156	0.00241216	0.015769	scaf24	4892155	4892994	+	840	-	-	-	-	-	-	-	-
BGIBMGA000914	31.8122	48.2363	15.3881	0.319015	-1.64831	0.00246136	0.0160255	scaf1	10696099	10704065	-	831	-	GO:0003777;GO:0003777;GO:0007018;GO:0007018;	-	-	-	-	-	-
BGIBMGA006901	66.9209	91.4858	42.356	0.462979	-1.11098	0.00246485	0.0160402	scaf44	2271815	2275763	-	753	-	-	K14443	-	-	-	-	101744020
BGIBMGA007516	175.82	242.849	108.79	0.447973	-1.15852	0.00248043	0.0161049	scaf66	1042600	1045518	-	1389	BMO.4342	GO:0000166;GO:0003746;GO:0003746;GO:0003746;GO:0003924;GO:0003924;GO:0003924;GO:0005525;GO:0005525;GO:0005525;GO:0005737;GO:0005737;GO:0006414;GO:0006414;GO:0006414;	K03231	-	-	-	Elongation factor 1-alpha[Source:UniProtKB/TrEMBL;Acc:H9JDB9]	101743635
BGIBMGA001815	43.1176	62.4918	23.7434	0.379944	-1.39614	0.00249741	0.0161623	scaf35	3305411	3306037	+	627	-	-	-	-	-	-	-	-
BGIBMGA003453	20.5626	33.2311	7.89405	0.23755	-2.0737	0.00251819	0.0162768	scaf9	7359432	7362114	-	252	-	GO:0005739;GO:0005739;GO:0005747;GO:0005747;	-	-	-	-	-	-
BGIBMGA007255	23.3406	37.0565	9.6247	0.25973	-1.94491	0.0025455	0.0164322	scaf92	1443891	1449149	-	1137	-	-	-	-	-	-	-	-
BGIBMGA010179	26.9148	41.6701	12.1594	0.291803	-1.77693	0.00263467	0.0169147	scaf15	637330	638520	-	465	-	-	-	-	-	-	-	-
BGIBMGA011535	407.545	638.52	176.571	0.276532	-1.85448	0.00274342	0.0174735	scaf22	1402162	1425993	+	6807	-	GO:0000166;GO:0004672;GO:0004672;GO:0004713;GO:0004713;GO:0004713;GO:0004714;GO:0004714;GO:0004714;GO:0005515;GO:0005524;GO:0005524;GO:0005524;GO:0006468;GO:0006468;GO:0007169;GO:0007169;GO:0016020;GO:0016020;GO:0016020;GO:0016021;GO:0016021;GO:0016301;GO:0016310;GO:0016740;GO:0018108;	-	-	-	-	Tyrosine-protein kinase receptor[Source:UniProtKB/TrEMBL;Acc:H9JPT0]	-
BGIBMGA005789	38.9654	61.0488	16.882	0.276532	-1.85448	0.00285433	0.0181172	scaf54	179684	180130	+	333	-	GO:0016020;GO:0016021;GO:0016021;	-	-	-	-	-	-
BGIBMGA007256	42.3676	60.7673	23.9679	0.39442	-1.34219	0.00285864	0.0181357	scaf92	1431640	1433520	-	1230	-	-	-	-	-	-	-	-
BGIBMGA004693	28.0706	43.2879	12.8533	0.296927	-1.75182	0.00288449	0.0182727	scaf108	228305	232801	-	1113	-	-	-	-	-	-	-	-
BGIBMGA012861	8.12571	15.2718	0.979613	0.0641452	-3.96252	0.00295327	0.0185715	scaf4	3182622	3188724	-	633	BMORCPH30	-	-	-	-	-	Putative cuticle protein[Source:UniProtKB/TrEMBL;Acc:C0H6I7]	100379466
BGIBMGA011749	44.8088	63.9763	25.6414	0.400795	-1.31906	0.00297369	0.0186543	scaf16	83819	88656	+	882	-	GO:0005515;	-	-	-	-	-	-
BGIBMGA000751	80.3485	110.218	50.4786	0.457988	-1.12662	0.00299978	0.0187632	scaf89	1409103	1410197	-	195	-	-	-	-	-	-	-	-
BGIBMGA005602	19.205	31.32	7.08995	0.226371	-2.14324	0.00310839	0.0192203	scaf33	97098	102123	+	1482	-	GO:0004553;GO:0004553;GO:0005975;GO:0005975;	-	-	-	-	-	-
BGIBMGA000405	43.2473	62.1185	24.376	0.392412	-1.34956	0.00313024	0.0193352	scaf18	2260383	2261775	+	552	-	-	-	-	-	-	-	-
BGIBMGA006128	3729.39	5003.96	2454.82	0.490576	-1.02745	0.00315058	0.0194328	scaf5	2307137	2322063	+	1479	-	-	-	-	-	-	-	-
BGIBMGA001672	25.1726	39.2225	11.1227	0.283579	-1.81818	0.00317028	0.019517	scaf35	1567228	1569192	-	621	-	-	-	-	-	-	-	-
BGIBMGA004633	10.1419	18.2675	2.01637	0.11038	-3.17945	0.00318838	0.0195859	scaf193	8426	10886	-	801	-	-	-	-	-	-	-	-
BGIBMGA006694	70.4804	95.7762	45.1847	0.471773	-1.08383	0.00320972	0.0197033	scaf10	2381995	2392515	+	2052	-	GO:0005515;GO:0005576;GO:0005576;	-	-	-	-	-	-
BGIBMGA008285	49.2249	69.3513	29.0986	0.419582	-1.25297	0.00321672	0.0197128	scaf94	1565878	1569752	+	588	-	-	-	-	-	-	-	-
BGIBMGA014457	61.9684	85.038	38.8988	0.457429	-1.12838	0.00338548	0.0205279	scaf264	34621	35991	+	501	-	-	-	-	-	-	-	-
BGIBMGA007316	64.92	91.3493	38.4906	0.421356	-1.24689	0.00340073	0.0205817	scaf209	28240	29401	-	417	-	-	-	-	-	-	-	-
BGIBMGA004894	19.3309	31.1718	7.48995	0.24028	-2.05721	0.0034272	0.020703	scaf144	98463	109641	+	1641	-	-	-	-	-	-	-	-
BGIBMGA001173	17.6857	29.0324	6.33891	0.218339	-2.19536	0.00345214	0.0208439	scaf1	7658744	7660746	+	957	-	GO:0003676;GO:0003676;GO:0016787;GO:0016787;GO:0046872;GO:0046872;	-	-	-	-	-	-
BGIBMGA003945	11.8784	20.875	2.8817	0.138045	-2.85679	0.00350304	0.0211177	scaf105	315279	327628	-	1611	-	GO:0004497;GO:0004497;GO:0005506;GO:0005506;GO:0016491;GO:0016705;GO:0016705;GO:0020037;GO:0020037;GO:0046872;GO:0055114;GO:0055114;GO:0055114;	-	-	-	-	-	-
BGIBMGA001031	19.1671	30.9585	7.37567	0.238244	-2.06949	0.00351689	0.0211559	scaf1	4411694	4428740	-	999	-	GO:0005861;GO:0005861;	-	-	-	-	-	-
BGIBMGA008320	76.2926	102.102	50.4827	0.494432	-1.01616	0.00353547	0.0212475	scaf2	9044414	9051267	-	1488	-	GO:0016020;GO:0016021;GO:0016021;	-	-	-	-	-	-
BGIBMGA012258	13.4948	23.2426	3.74702	0.161214	-2.63295	0.00355811	0.0213636	scaf26	2073585	2076213	-	1470	-	GO:0005509;GO:0005509;GO:0016020;GO:0016021;GO:0016021;GO:0016021;GO:0016079;GO:0016079;GO:0045202;GO:0098793;GO:0098793;	-	-	-	-	-	-
BGIBMGA013714	61.1496	83.5801	38.7192	0.463259	-1.11011	0.00357032	0.0214269	scaf104	312754	326336	+	2328	-	GO:0004222;GO:0004222;GO:0006508;GO:0006508;GO:0008237;GO:0008237;GO:0016020;GO:0016021;GO:0016021;	-	-	-	-	-	-
BGIBMGA006950	58.5693	80.9459	36.1926	0.447121	-1.16126	0.00361783	0.0216336	scaf44	1750276	1752747	+	261	-	-	-	-	-	-	-	-
BGIBMGA003712	7.86305	14.8036	0.92247	0.0623138	-4.00431	0.00377128	0.0223416	scaf9	5767467	5774317	+	711	-	-	-	-	-	-	-	-
BGIBMGA010081	16.0197	26.4516	5.58787	0.211249	-2.24298	0.00385456	0.0226786	scaf45	1947609	1948571	+	963	-	GO:0016020;GO:0016021;GO:0016021;	-	-	-	-	-	101737011
BGIBMGA003270	12.621	21.7847	3.45722	0.158699	-2.65563	0.00386773	0.0227386	scaf73	1092524	1097071	+	804	-	GO:0005576;GO:0005576;GO:0006030;GO:0006030;GO:0008061;GO:0008061;	-	-	-	-	-	101740538
BGIBMGA007163	6.64466	12.7709	0.518378	0.0405904	-4.62272	0.00394905	0.0231101	scaf74	575913	576761	-	849	-	-	-	-	-	-	-	-
BGIBMGA007370	24.8816	38.1262	11.637	0.305223	-1.71207	0.00407812	0.0236696	scaf55	701724	702807	-	357	-	-	-	-	-	-	-	-
BGIBMGA012464	36.2858	53.0365	19.5351	0.368334	-1.44092	0.0040827	0.0236855	scaf56	1416879	1429465	-	1476	-	GO:0005515;	-	-	-	-	-	-
BGIBMGA008962	18.9577	30.5969	7.31852	0.239191	-2.06376	0.00408767	0.0237037	scaf17	1529348	1530737	+	525	-	-	-	-	-	-	-	-
BGIBMGA001351	32.2222	47.8481	16.5963	0.346853	-1.5276	0.00417279	0.0240458	scaf118	269885	277683	-	1023	-	GO:0016491;GO:0016491;GO:0055114;GO:0055114;	-	-	-	-	-	-
BGIBMGA002764	42.1148	59.8576	24.3719	0.407165	-1.29631	0.00420049	0.024173	scaf146	146260	153323	+	1449	-	GO:0005515;GO:0034464;GO:0034464;GO:1905515;GO:1905515;	-	-	-	-	-	-
BGIBMGA009047	3527.25	5364.26	1690.24	0.315094	-1.66615	0.00430452	0.0246396	scaf63	1785779	1787323	-	585	-	GO:0005515;	-	-	-	-	-	101742927
BGIBMGA006288	26.7896	40.787	12.7921	0.313632	-1.67286	0.0043187	0.0246988	scaf49	218166	219563	-	1398	-	GO:0016020;GO:0016021;GO:0016021;	-	-	-	-	-	-
BGIBMGA013746	41.5221	60.2191	22.825	0.379032	-1.39961	0.00436088	0.0249179	scaf47	2387909	2391158	-	873	-	GO:0004252;GO:0006508;	-	-	-	-	-	-
BGIBMGA002923	38.3596	58.2248	18.4943	0.317635	-1.65456	0.00439221	0.0250414	scaf30	3309111	3311236	+	327	-	-	-	-	-	-	-	-
BGIBMGA005848	41.1264	59.0279	23.225	0.393458	-1.34572	0.0044699	0.0254057	scaf125	96637	99746	-	537	-	GO:0016020;GO:0016021;GO:0016021;GO:0016021;GO:0033227;GO:0033227;GO:0051033;GO:0051033;	-	-	-	-	-	-
BGIBMGA007329	165.935	221.814	110.055	0.49616	-1.01112	0.00449155	0.0255062	scaf55	2592830	2598025	-	690	-	GO:0005515;	-	-	-	-	-	-
BGIBMGA007680	15.6771	25.8234	5.53073	0.214175	-2.22314	0.00464805	0.0262561	scaf3	5611359	5621357	-	3741	-	-	-	-	-	-	-	-
BGIBMGA011836	31.8738	47.3799	16.3677	0.345456	-1.53342	0.00474673	0.0267315	scaf16	3135228	3135884	+	657	-	-	-	-	-	-	-	-
BGIBMGA003024	16.393	27.0797	5.70625	0.21072	-2.2466	0.00476403	0.0268172	scaf13	3782049	3784077	-	441	-	GO:0016020;GO:0016021;GO:0016021;	-	-	-	-	-	-
BGIBMGA003258	311.531	490.05	133.011	0.271423	-1.88138	0.004827	0.0271243	scaf73	474170	481189	+	1299	-	GO:0004672;GO:0004672;GO:0006468;	-	-	-	-	-	-
BGIBMGA008839	26.2812	39.9989	12.5635	0.314097	-1.67072	0.00506114	0.0282796	scaf174	139254	145425	+	1464	-	GO:0005515;GO:0046872;GO:0046872;	-	-	-	-	-	-
BGIBMGA003688	35.8976	51.8602	19.9351	0.384401	-1.37931	0.00508084	0.0283651	scaf9	4264215	4267947	+	1050	-	GO:0004521;GO:0004521;GO:0090502;	K14648	EC:3.1.-.-	-	-	-	101740108
BGIBMGA004243	53.2416	73.4049	33.0783	0.450627	-1.14999	0.00509412	0.0284023	scaf150	99980	110695	-	1104	-	GO:0016020;GO:0016021;GO:0016021;	-	-	-	-	-	-
BGIBMGA008194	64.0215	86.9523	41.0907	0.472566	-1.08141	0.00514522	0.02865	scaf52	2330965	2336740	+	693	-	-	-	-	-	-	-	-
BGIBMGA009846	6.34201	12.2228	0.461235	0.0377357	-4.72793	0.00522765	0.0289589	scaf51	1370652	1377038	-	570	-	-	-	-	-	-	-	-
BGIBMGA012706	52.8323	72.7618	32.9027	0.452198	-1.14497	0.00526231	0.0291043	scaf69	1322129	1329917	+	2148	-	-	-	-	-	-	-	-
BGIBMGA011699	24.9713	38.0729	11.8696	0.311761	-1.68149	0.00529443	0.0292533	scaf16	1217883	1220354	-	468	-	-	-	-	-	-	-	-
BGIBMGA011789	130.429	187.967	72.8914	0.387788	-1.36666	0.00530079	0.0292759	scaf16	1484611	1486512	+	1362	-	GO:0006508;GO:0006508;GO:0006508;GO:0008233;GO:0008237;GO:0008237;GO:0016020;GO:0016021;GO:0016021;GO:0016787;GO:0016805;GO:0016805;GO:0016805;GO:0031225;GO:0031225;GO:0046872;GO:0046872;	-	-	-	-	-	-
BGIBMGA011350	14.6356	24.2589	5.01235	0.206619	-2.27496	0.00541544	0.0298069	scaf12	2740370	2753615	+	1728	-	GO:0016020;GO:0016020;GO:0016020;GO:0016021;GO:0016021;	-	-	-	-	-	-
BGIBMGA014436	15.4792	25.5419	5.41644	0.212061	-2.23745	0.0054509	0.0299893	scaf212	19836	31115	-	852	-	GO:0004252;GO:0004252;GO:0006508;GO:0006508;	-	-	-	-	-	-
BGIBMGA004991	20.4945	32.6296	8.35937	0.25619	-1.96472	0.00552527	0.0302971	scaf65	1422376	1428267	+	1131	-	-	-	-	-	-	-	-
BGIBMGA007369	19.2093	30.4103	8.00833	0.263343	-1.92499	0.00552567	0.0302971	scaf55	742868	745353	-	618	-	GO:0003677;GO:0003677;GO:0005634;GO:0005634;GO:0006351;GO:0006351;GO:0006355;GO:0006355;	-	-	-	-	-	-
BGIBMGA010093	16.2351	26.4782	5.99196	0.226298	-2.14371	0.00552841	0.0302993	scaf15	6091886	6095317	-	597	-	GO:0005515;	-	-	-	-	-	-
BGIBMGA006501	49.5817	68.9098	30.2537	0.439034	-1.1876	0.00556935	0.0304718	scaf11	4233503	4243411	+	4131	-	-	-	-	-	-	-	-
BGIBMGA005482	73.3545	101.071	45.6377	0.45154	-1.14707	0.00557797	0.0304981	scaf19	4323128	4327090	+	1665	-	GO:0004930;GO:0004930;GO:0007186;GO:0007186;GO:0016020;GO:0016021;GO:0016021;GO:0016021;	-	-	-	-	-	-
BGIBMGA002758	19.1045	30.5436	7.66547	0.250968	-1.99442	0.0056098	0.0305763	scaf146	42278	48246	-	441	-	GO:0005509;GO:0005509;	-	-	-	-	-	-
BGIBMGA006666	29.551	43.8894	15.2126	0.346612	-1.52861	0.00596514	0.0319854	scaf10	527986	531316	-	2877	-	-	-	-	-	-	-	-
BGIBMGA001051	29.4482	43.5694	15.3269	0.35178	-1.50726	0.00602035	0.0322411	scaf1	1998421	1999473	-	207	-	GO:0005515;	-	-	-	-	-	-
BGIBMGA007668	7.69943	14.3621	1.03676	0.0721869	-3.79212	0.00615593	0.0328308	scaf3	6492346	6495310	-	525	-	GO:0004252;GO:0004252;GO:0006508;GO:0006508;	-	-	-	-	-	-
BGIBMGA006429	62.2437	83.6334	40.8539	0.488488	-1.0336	0.00630423	0.0335107	scaf11	857849	858724	-	387	-	-	-	-	-	-	-	-
BGIBMGA004925	28.6682	49.8424	7.49404	0.150355	-2.73356	0.00631172	0.0335229	scaf65	1199083	1202442	-	516	-	GO:0016020;GO:0016021;GO:0016021;	-	-	-	-	-	101738037
BGIBMGA002506	30.1281	44.4109	15.8452	0.356787	-1.48686	0.00641906	0.0339391	scaf14	3187299	3194489	+	918	-	GO:0004930;GO:0004930;GO:0004930;GO:0004995;GO:0004995;GO:0005886;GO:0005886;GO:0007165;GO:0007186;GO:0007186;GO:0007186;GO:0007217;GO:0016020;GO:0016021;GO:0016021;GO:0016021;	-	-	-	-	-	-
BGIBMGA013102	40.4627	68.1334	12.7921	0.187751	-2.41311	0.00677653	0.0354078	scaf4	8971222	8982494	+	1959	-	GO:0016020;GO:0016021;GO:0016021;	-	-	-	-	-	-
BGIBMGA003943	88.8432	120.983	56.7033	0.468687	-1.0933	0.00682809	0.0356157	scaf105	350236	359852	-	1596	-	GO:0004497;GO:0004497;GO:0005506;GO:0005506;GO:0016491;GO:0016705;GO:0016705;GO:0020037;GO:0020037;GO:0046872;GO:0055114;GO:0055114;GO:0055114;	K15003	EC:1.14.-.-	-	-	-	100126160
BGIBMGA003817	43.9872	61.5821	26.3924	0.428573	-1.22239	0.00683014	0.0356157	scaf107	689681	704396	-	1707	-	GO:0008152;GO:0016740;GO:0016757;GO:0016758;GO:0016758;	-	-	-	-	-	-
BGIBMGA003512	28.4997	45.5339	11.4655	0.251803	-1.98963	0.00702825	0.0365157	scaf9	4068774	4074436	-	1509	-	GO:0004553;GO:0004553;GO:0005975;GO:0005975;GO:0008152;GO:0016787;GO:0016798;	-	-	-	-	-	-
BGIBMGA013215	22.8388	35.1305	10.5472	0.300228	-1.73587	0.00749435	0.0385793	scaf39	148305	155924	+	2004	-	GO:0016614;GO:0016614;GO:0050660;GO:0050660;GO:0055114;GO:0055114;	-	-	-	-	-	-
BGIBMGA011678	4.60021	9.20041	0	0	-Inf	0.0076676	0.0392675	scaf16	1752617	1752892	-	276	-	-	-	-	-	-	-	-
BGIBMGA004483	53.3565	72.6552	34.0579	0.46876	-1.09308	0.00790465	0.0402257	scaf37	2674575	2680979	+	471	-	GO:0016020;GO:0016021;GO:0016021;GO:0016021;GO:0022857;GO:0022857;GO:0055085;GO:0055085;	-	-	-	-	-	-
BGIBMGA001896	2394.53	4087.45	701.611	0.17165	-2.54246	0.00794695	0.040425	scaf28	1356902	1383224	-	4161	-	GO:0016020;GO:0016021;GO:0016021;	-	-	-	-	-	-
BGIBMGA012326	39.7124	56.0855	23.3393	0.416137	-1.26487	0.00832165	0.0419994	scaf26	1798935	1800909	+	435	-	-	-	-	-	-	-	-
BGIBMGA001857	11.0028	19.1239	2.8817	0.150686	-2.73039	0.00858501	0.0431427	scaf28	3117016	3121153	-	3831	-	GO:0005576;GO:0005576;GO:0006030;GO:0006030;GO:0008061;GO:0008061;	-	-	-	-	-	-
BGIBMGA013427	129.737	176.909	82.565	0.46671	-1.0994	0.00860405	0.0431878	scaf50	2680493	2737063	+	16398	-	GO:0005515;GO:0007165;GO:0007165;	-	-	-	-	-	-
BGIBMGA000363	19.0801	29.8621	8.29814	0.277881	-1.84746	0.00863089	0.0432383	scaf18	122489	124917	+	483	-	-	-	-	-	-	-	-
BGIBMGA012011	17.7549	27.9628	7.5471	0.269898	-1.88951	0.00875559	0.043761	scaf141	39912	44334	+	1389	-	GO:0000166;GO:0004672;GO:0004672;GO:0004674;GO:0004674;GO:0005524;GO:0005524;GO:0005524;GO:0006468;GO:0006468;	-	-	-	-	-	-
BGIBMGA002531	58.1214	77.9235	38.3192	0.491754	-1.02399	0.00882019	0.0440156	scaf14	5203566	5213879	+	462	-	GO:0006508;GO:0006508;GO:0008237;GO:0008237;GO:0008241;GO:0008241;GO:0016020;GO:0016020;GO:0016020;GO:0016021;GO:0016021;	-	-	-	-	-	-
BGIBMGA013431	174.339	237.353	111.325	0.469027	-1.09226	0.00884838	0.0441391	scaf111	709434	732462	-	1677	-	GO:0005515;	-	-	-	-	-	-
BGIBMGA013687	17.6121	27.9628	7.26138	0.25968	-1.94519	0.00893419	0.0444811	scaf160	204653	205486	-	834	C/EBP	GO:0003700;GO:0003700;GO:0006355;GO:0006355;	K10052	-	-	-	Chorion specific C/EBP[Source:UniProtKB/TrEMBL;Acc:Q38Q34]	692780
BGIBMGA009511	35.8507	50.8438	20.8576	0.410229	-1.2855	0.00899086	0.0446656	scaf40	1860073	1861245	+	489	-	-	-	-	-	-	-	-
BGIBMGA002194	14.655	23.9507	5.3593	0.223764	-2.15995	0.00909828	0.0450197	scaf64	2165894	2166785	+	369	-	-	-	-	-	-	-	-
BGIBMGA008241	55.4858	74.9545	36.0171	0.48052	-1.05733	0.00913069	0.0451627	scaf94	1472193	1479519	-	1251	-	-	-	-	-	-	-	-
BGIBMGA009084	40.7676	56.7019	24.8332	0.43796	-1.19113	0.00919626	0.0453999	scaf63	39115	45321	+	1245	-	GO:0005515;	-	-	-	-	-	-
BGIBMGA013479	32.4364	46.7784	18.0943	0.386808	-1.37031	0.00930002	0.0457544	scaf101	1080776	1089915	-	2616	-	-	-	-	-	-	-	-
BGIBMGA010913	8.75247	15.66	1.84494	0.117812	-3.08544	0.00957274	0.0468635	scaf68	1991982	1996457	-	1122	-	GO:0042302;GO:0042302;GO:0042302;	-	-	-	-	-	-
BGIBMGA013113	42.9479	59.736	26.1597	0.437922	-1.19125	0.009688	0.0472878	scaf124	567981	581743	-	1359	-	-	-	-	-	-	-	-
BGIBMGA004172	7.83483	14.2288	1.44085	0.101263	-3.30382	0.00986048	0.0479623	scaf60	336676	340121	-	2133	-	GO:0005515;	-	-	-	-	-	-
BGIBMGA005090	11.3458	19.1772	3.51436	0.183257	-2.44806	0.00992143	0.0481916	scaf32	449268	449922	-	258	-	GO:0004252;GO:0004252;GO:0006508;GO:0006508;	-	-	-	-	-	-
BGIBMGA000749	16.7947	27.6546	5.93482	0.214606	-2.22024	0.0100366	0.0486696	scaf8	7891768	7892082	+	315	-	-	-	-	-	-	-	-
BGIBMGA000148	18.1358	28.3776	7.89405	0.278179	-1.84592	0.0101384	0.0490736	scaf43	2109927	2110303	+	330	-	GO:0003676;GO:0003676;	-	-	-	-	-	-
BGIBMGA004556	57.4189	76.7472	38.0906	0.496313	-1.01068	0.0105135	0.0506416	scaf48	1466647	1474004	-	900	-	-	-	-	-	-	-	-
BGIBMGA014471	23.0239	34.5823	11.4655	0.331544	-1.59273	0.0105724	0.0508114	scaf261	26170	26643	+	384	-	-	-	-	-	-	-	-
BGIBMGA007660	24.9872	37.2965	12.6778	0.33992	-1.55673	0.0106978	0.0513375	scaf3	7096714	7099408	-	1221	-	-	-	-	-	-	-	-
BGIBMGA011739	20.1962	31.1718	9.22061	0.2958	-1.75731	0.0107098	0.0513758	scaf16	157349	163633	-	891	-	GO:0006887;GO:0006887;GO:0016020;GO:0016020;GO:0017137;GO:0017137;GO:0048786;GO:0048786;	-	-	-	-	-	-
BGIBMGA013639	34.5102	49.2527	19.7678	0.401355	-1.31705	0.0107521	0.0515405	scaf78	1148852	1159587	+	1095	-	GO:0016020;GO:0016021;GO:0016021;	-	-	-	-	-	-
BGIBMGA008919	13.5717	22.3595	4.78378	0.213948	-2.22467	0.0108115	0.0517673	scaf17	1211927	1216274	-	1041	-	-	-	-	-	-	-	-
BGIBMGA013881	28.053	41.1219	14.984	0.36438	-1.45648	0.0111112	0.0530057	scaf62	2141146	2142530	+	555	-	-	-	-	-	-	-	-
BGIBMGA012530	29.4717	42.5798	16.3636	0.384305	-1.37968	0.0112182	0.0533578	scaf77	1084924	1085709	-	786	-	-	-	-	-	-	-	-
BGIBMGA009880	30.1965	47.3682	13.0248	0.274969	-1.86266	0.0113641	0.053931	scaf51	590759	591894	+	174	-	-	-	-	-	-	-	-
BGIBMGA013797	673.036	1002.33	343.746	0.342948	-1.54394	0.0113722	0.053931	scaf47	2281147	2289247	+	837	-	GO:0004252;GO:0004252;GO:0006508;GO:0006508;	-	-	-	-	-	-
BGIBMGA007428	18.6005	28.8458	8.35528	0.289653	-1.7876	0.0114874	0.0544172	scaf55	1961306	1963950	+	600	-	GO:0016020;GO:0016021;GO:0016021;	-	-	-	-	-	-
BGIBMGA000908	25.4309	37.5514	13.3105	0.354461	-1.4963	0.0116685	0.0550931	scaf1	10829388	10831559	-	633	-	GO:0005515;	-	-	-	-	-	-
BGIBMGA011886	35.8777	50.3223	21.4331	0.425917	-1.23136	0.0117394	0.055367	scaf59	2243562	2255912	-	1914	-	GO:0004601;GO:0004601;GO:0006979;GO:0006979;GO:0020037;GO:0020037;GO:0042600;GO:0042600;GO:0055114;GO:0055114;GO:0098869;	-	-	-	-	-	-
BGIBMGA002419	39.492	55.0692	23.9148	0.434268	-1.20334	0.0118349	0.0556253	scaf14	2188923	2214317	-	3921	-	GO:0005515;	-	-	-	-	-	-
BGIBMGA011617	11.1212	18.8423	3.40007	0.180449	-2.47034	0.0118516	0.055672	scaf16	5219643	5222592	-	996	-	GO:0005576;GO:0005576;GO:0052689;GO:0052689;	-	-	-	-	-	-
BGIBMGA010275	38.1952	53.398	22.9923	0.430584	-1.21563	0.0118918	0.0558243	scaf15	5261785	5270500	+	1218	-	GO:0016020;GO:0016021;GO:0016021;	-	-	-	-	-	-
BGIBMGA005080	11.0393	18.7357	3.34293	0.178426	-2.4866	0.0120605	0.0564678	scaf32	1329255	1339451	-	1722	-	-	-	-	-	-	-	-
BGIBMGA011706	20.4952	31.48	9.51041	0.30211	-1.72685	0.0121609	0.056876	scaf16	995181	1000286	-	648	-	-	-	-	-	-	-	-
BGIBMGA008794	48.1585	65.2593	31.0578	0.475914	-1.07123	0.0121677	0.0568873	scaf115	680170	687159	+	1518	-	GO:0003676;GO:0003676;	-	-	-	-	-	-
BGIBMGA002942	70.6897	107.436	33.9436	0.315943	-1.66226	0.0121815	0.0569309	scaf30	4393941	4396063	+	813	-	-	-	-	-	-	-	-
BGIBMGA003678	6.61453	12.2494	0.979613	0.079972	-3.64436	0.0122893	0.0573518	scaf9	3866809	3873202	+	795	-	GO:0016020;GO:0016021;GO:0016021;	-	-	-	-	-	105842196
BGIBMGA005123	7.56265	13.6273	1.49799	0.109926	-3.1854	0.0123573	0.0576063	scaf32	1535711	1541329	+	807	-	GO:0005515;	-	-	-	-	-	-
BGIBMGA001248	13.4766	21.998	4.95521	0.225257	-2.15036	0.0124327	0.0578114	scaf1	11151977	11163703	+	2097	-	-	-	-	-	-	-	-
BGIBMGA005048	13.2823	21.838	4.72664	0.21644	-2.20796	0.0128584	0.0594444	scaf32	2807134	2845074	-	12735	-	GO:0003777;GO:0003777;GO:0005524;GO:0005524;GO:0007018;GO:0007018;GO:0016887;GO:0016887;GO:0030286;GO:0030286;	-	-	-	-	-	-
BGIBMGA011312	34.2516	48.0497	20.4535	0.425674	-1.23218	0.0130948	0.0603437	scaf12	794312	796392	+	327	-	-	-	-	-	-	-	-
BGIBMGA009452	20.1746	34.8756	5.47359	0.156946	-2.67166	0.0132266	0.0607573	scaf40	1945005	1971694	-	3939	-	GO:0000166;GO:0005524;GO:0005524;GO:0005524;GO:0016020;GO:0016021;GO:0016021;GO:0016021;GO:0016887;GO:0016887;GO:0042626;GO:0042626;GO:0055085;GO:0055085;	-	-	-	-	-	-
BGIBMGA013934	22.6744	41.6018	3.74702	0.0900687	-3.47283	0.0133831	0.0612797	scaf29	490599	499580	-	1503	-	-	-	-	-	-	-	-
BGIBMGA005790	193.487	284.396	102.578	0.360686	-1.47118	0.013415	0.0613821	scaf54	183692	185928	+	321	-	GO:0016020;GO:0016021;GO:0016021;	-	-	-	-	-	-
BGIBMGA014225	4.0787	8.15741	0	0	-Inf	0.013808	0.0628854	scaf80	1510553	1517860	-	1239	-	GO:0005272;GO:0005272;GO:0005272;GO:0006811;GO:0006814;GO:0006814;GO:0006814;GO:0016020;GO:0016020;GO:0016020;GO:0016021;GO:0016021;GO:0035725;	-	-	-	-	-	-
BGIBMGA007678	39.416	54.8559	23.976	0.437073	-1.19405	0.0139287	0.0632832	scaf3	5719200	5731481	-	873	-	GO:0005576;GO:0005576;GO:0006030;GO:0006030;GO:0008061;GO:0008061;	-	-	-	-	-	-
BGIBMGA002911	22.2624	33.4593	11.0655	0.330716	-1.59633	0.0140686	0.0637839	scaf30	2539725	2540536	+	189	-	-	-	-	-	-	-	-
BGIBMGA007126	23.7973	35.2638	12.3309	0.349675	-1.51591	0.0142693	0.0645123	scaf21	4746331	4748592	+	918	-	-	-	-	-	-	-	-
BGIBMGA011547	12.4923	20.4335	4.55112	0.222728	-2.16664	0.0145398	0.0654595	scaf22	1964842	1970133	+	1521	-	-	-	-	-	-	-	-
BGIBMGA008973	15.3542	24.3123	6.39606	0.26308	-1.92643	0.0145792	0.065568	scaf17	2154418	2160393	+	1098	-	GO:0004181;GO:0004181;GO:0006508;GO:0006508;GO:0008270;GO:0008270;	-	-	-	-	-	-
BGIBMGA003227	14.6439	23.2959	5.99196	0.257211	-1.95898	0.0147069	0.0660505	scaf73	1065980	1068862	-	288	-	GO:0005515;	-	-	-	-	-	-
BGIBMGA009328	13.8156	22.3862	5.24501	0.234297	-2.09359	0.0150296	0.067265	scaf53	1496880	1498479	-	819	-	-	-	-	-	-	-	-
BGIBMGA008496	50.3519	68.095	32.6088	0.478873	-1.06229	0.0150689	0.0673749	scaf2	5548624	5561095	+	1917	-	-	-	-	-	-	-	-
BGIBMGA007758	48.9891	65.8224	32.1558	0.488524	-1.0335	0.0151155	0.0675324	scaf3	358556	369202	-	765	-	GO:0003677;GO:0003677;GO:0003700;GO:0006355;GO:0006355;	-	-	-	-	-	-
BGIBMGA006313	17.3631	26.9464	7.77976	0.288712	-1.7923	0.015715	0.069727	scaf49	1317110	1320058	+	1980	-	GO:0000166;GO:0005524;GO:0005524;	-	-	-	-	-	-
BGIBMGA006801	48.3398	65.0993	31.5803	0.485109	-1.04362	0.0158559	0.0701111	scaf70	1833659	1849284	-	2430	-	GO:0000166;GO:0004383;GO:0004383;GO:0004672;GO:0004672;GO:0005524;GO:0005524;GO:0006182;GO:0006468;GO:0006468;GO:0016020;GO:0016021;GO:0016021;GO:0016829;	-	-	-	-	-	-
BGIBMGA011119	39.8008	54.9359	24.6658	0.448994	-1.15523	0.0159273	0.0703059	scaf95	583494	625777	-	5952	-	-	-	-	-	-	-	-
BGIBMGA002729	9.88949	16.783	2.99598	0.178513	-2.4859	0.0163054	0.0716805	scaf20	5386218	5390561	+	867	-	GO:0000166;GO:0005524;GO:0005524;GO:0005524;GO:0016021;GO:0016021;GO:0016887;GO:0016887;GO:0042626;GO:0042626;GO:0055085;GO:0055085;	-	-	-	-	-	-
BGIBMGA007305	25.2065	36.8699	13.5432	0.367323	-1.44488	0.0163443	0.0717654	scaf92	1427138	1431555	+	1068	-	GO:0016020;GO:0016021;GO:0016021;	-	-	-	-	-	-
BGIBMGA008500	29.8533	48.0614	11.6452	0.242298	-2.04515	0.0167738	0.0731902	scaf2	6164534	6169389	+	1239	-	GO:0016020;GO:0016021;GO:0016021;	-	-	-	-	-	101746716
BGIBMGA007290	22.7521	33.406	12.0982	0.362157	-1.46531	0.0169758	0.0738466	scaf92	750400	755554	+	1083	-	GO:0004970;GO:0004970;GO:0016020;GO:0016020;GO:0016020;GO:0016021;GO:0016021;GO:0035235;	-	-	-	-	-	-
BGIBMGA013912	14.3527	22.8277	5.87768	0.25748	-1.95747	0.0172958	0.0749853	scaf29	2295587	2306766	-	1173	-	-	-	-	-	-	-	-
BGIBMGA008318	8.07877	14.2555	1.90208	0.133428	-2.90586	0.0173846	0.0753196	scaf2	9126450	9127880	-	513	-	-	-	-	-	-	-	-
BGIBMGA009936	17.9268	27.4413	8.41242	0.306561	-1.70575	0.0174033	0.0753466	scaf137	211266	213183	-	1605	-	-	-	-	-	-	-	-
BGIBMGA013289	51.1538	69.3396	32.9681	0.475458	-1.07261	0.0176356	0.0760745	scaf71	1772969	1777053	-	558	-	GO:0016020;GO:0016021;GO:0016021;	-	-	-	-	-	-
BGIBMGA000113	3.85794	7.71589	0	0	-Inf	0.0181442	0.0777926	scaf43	247571	248203	-	384	-	-	-	-	-	-	-	-
BGIBMGA002005	3.85794	7.71589	0	0	-Inf	0.0181442	0.0777926	scaf23	4616836	4619857	-	930	-	GO:0005743;GO:0005743;GO:0016020;GO:0016021;GO:0016021;GO:0022857;GO:0022857;GO:0055085;GO:0055085;	K05863	-	-	-	-	101738591
BGIBMGA003914	23.1406	34.0075	12.2737	0.360912	-1.47028	0.0185446	0.0792004	scaf114	349677	357926	-	2319	-	GO:0016020;GO:0016021;GO:0016021;GO:0016021;GO:0055085;GO:0055085;	-	-	-	-	-	101742394
BGIBMGA003967	5.09348	9.66859	0.518378	0.0536146	-4.22123	0.018691	0.0796144	scaf36	4055612	4057512	-	303	-	GO:0006644;GO:0006644;GO:0016020;GO:0016021;GO:0016021;GO:0016311;GO:0030111;GO:0030111;GO:0042577;GO:0042577;	-	-	-	-	-	-
BGIBMGA002668	8.8328	15.2451	2.42046	0.158769	-2.655	0.0188668	0.0803099	scaf20	1516126	1519029	+	624	-	-	-	-	-	-	-	-
BGIBMGA013378	15.72	24.5255	6.91443	0.281928	-1.8266	0.0189655	0.0805704	scaf50	2584177	2597418	-	1908	-	-	-	-	-	-	-	-
BGIBMGA001020	8.79472	15.1118	2.4776	0.163951	-2.60866	0.0190394	0.0808047	scaf1	5251217	5253334	-	438	-	GO:0004252;GO:0004252;GO:0006508;GO:0006508;	-	-	-	-	-	-
BGIBMGA011649	18.5001	28.0694	8.9308	0.318168	-1.65214	0.0191234	0.0810811	scaf16	2950037	2961201	-	1737	-	GO:0016020;GO:0016021;GO:0016021;	-	-	-	-	-	-
BGIBMGA008110	94.5021	145.334	43.6703	0.300483	-1.73465	0.0204314	0.0856405	scaf87	904444	912213	+	1551	-	-	-	-	-	-	-	101735869
BGIBMGA003944	12.5934	20.4602	4.72664	0.231016	-2.11393	0.0208001	0.0867905	scaf105	332199	345180	-	1596	CYP9A19	GO:0004497;GO:0004497;GO:0005506;GO:0005506;GO:0016491;GO:0016705;GO:0016705;GO:0020037;GO:0020037;GO:0046872;GO:0055114;GO:0055114;GO:0055114;	K15003	EC:1.14.-.-	-	-	Cytochrome P450[Source:UniProtKB/TrEMBL;Acc:A4UU25]	100126178
BGIBMGA000755	32.4202	45.134	19.7065	0.436623	-1.19554	0.0210496	0.0876612	scaf89	1185359	1186051	-	693	-	-	-	-	-	-	-	101736091
BGIBMGA003724	42.1836	56.9952	27.372	0.480251	-1.05814	0.0212375	0.0883297	scaf9	6405433	6416516	+	2370	-	GO:0003950;GO:0003950;GO:0003950;GO:0016740;GO:0016757;GO:0016787;GO:0016787;	-	-	-	-	-	-
BGIBMGA011498	21.5086	31.8415	11.1757	0.35098	-1.51054	0.0213469	0.0886703	scaf22	146618	149865	-	1143	-	GO:0003676;GO:0003676;	-	-	-	-	-	-
BGIBMGA014011	44.9506	60.1658	29.7353	0.494223	-1.01677	0.0214614	0.0890185	scaf29	4040525	4050632	+	969	-	GO:0005507;GO:0005507;GO:0016491;GO:0016491;GO:0016491;GO:0046872;GO:0055114;GO:0055114;GO:0055114;	-	-	-	-	-	-
BGIBMGA003903	20.2502	30.1288	10.3716	0.344244	-1.5385	0.0220376	0.0909237	scaf200	12264	14966	-	621	-	-	-	-	-	-	-	-
BGIBMGA011148	15.2954	23.7907	6.80015	0.285832	-1.80676	0.02247	0.0922643	scaf95	794918	801727	+	1275	-	GO:0006629;GO:0006629;GO:0016020;GO:0016021;GO:0016021;GO:0016491;GO:0055114;GO:0080019;GO:0080019;GO:0102965;GO:0102965;	-	-	-	-	-	-
BGIBMGA008802	24.4814	35.3054	13.6574	0.386837	-1.3702	0.0232093	0.0947267	scaf134	797487	804097	-	753	-	GO:0004930;GO:0004930;GO:0004930;GO:0007165;GO:0007186;GO:0007186;GO:0007186;GO:0016020;GO:0016021;GO:0016021;GO:0016021;	-	-	-	-	-	-
BGIBMGA003025	8.51682	14.6703	2.36332	0.161095	-2.63402	0.0232312	0.094774	scaf13	3716285	3717739	-	588	-	GO:0004252;GO:0004252;GO:0006508;GO:0006508;	-	-	-	-	-	-
BGIBMGA006345	6.83181	12.2228	1.44085	0.117882	-3.08458	0.0234672	0.0955369	scaf11	6780031	6788614	-	1512	-	GO:0005524;GO:0005524;GO:0006298;GO:0006298;GO:0007131;GO:0007131;GO:0016887;GO:0016887;GO:0032300;GO:0032300;	-	-	-	-	-	-
BGIBMGA013953	16.5218	25.4352	7.60833	0.299126	-1.74118	0.0242781	0.0982794	scaf29	347088	347276	+	189	-	-	-	-	-	-	-	-
BGIBMGA007014	10.9275	17.8793	3.97559	0.222357	-2.16905	0.0243111	0.0983821	scaf21	2431115	2433743	-	699	BMORCPR9	GO:0042302;GO:0042302;GO:0042302;	-	-	-	-	Putative cuticle protein[Source:UniProtKB/TrEMBL;Acc:C0H6K0]	100379457
BGIBMGA004237	10.0668	16.6763	3.45722	0.207313	-2.27012	0.0245635	0.0991234	scaf150	301542	301802	-	261	-	-	-	-	-	-	-	-
BGIBMGA001240	12.186	19.6454	4.72664	0.240598	-2.05531	0.0250482	0.100732	scaf1	10998454	11000692	+	909	-	GO:0016020;GO:0016021;GO:0016021;GO:0016021;	-	-	-	-	-	-
BGIBMGA011191	15.2251	23.5359	6.91443	0.293783	-1.76718	0.0254047	0.101911	scaf12	5429007	5440003	-	1248	-	-	-	-	-	-	-	-
BGIBMGA002421	14.4616	22.4129	6.51034	0.290473	-1.78352	0.0262424	0.104459	scaf14	2176408	2177371	-	267	-	-	-	-	-	-	-	-
BGIBMGA005970	17.1655	26.09	8.24099	0.315867	-1.66261	0.0263674	0.104827	scaf5	6031539	6032566	-	951	-	-	-	-	-	-	-	-
BGIBMGA002056	30.4095	42.6064	18.2126	0.427462	-1.22613	0.0263846	0.104863	scaf23	407753	411868	-	1239	-	-	-	-	-	-	-	-
BGIBMGA001942	21.942	33.7409	10.1431	0.300617	-1.734	0.0264394	0.104984	scaf28	2388926	2407097	+	2292	-	GO:0005515;	-	-	-	-	-	-
BGIBMGA003639	38.9351	52.7432	25.1271	0.476404	-1.06974	0.0266226	0.105548	scaf9	2171470	2193358	+	3450	-	-	-	-	-	-	-	-
BGIBMGA009891	26.1307	37.1632	15.0983	0.40627	-1.29949	0.02758	0.108509	scaf51	1191948	1205588	+	5709	-	GO:0005576;GO:0005576;GO:0006030;GO:0006030;GO:0008061;GO:0008061;	-	-	-	-	-	-
BGIBMGA008115	12.8298	20.3002	5.3593	0.264002	-1.92138	0.0281509	0.110418	scaf87	1373894	1377117	+	2361	-	-	-	-	-	-	-	-
BGIBMGA011225	25.5367	36.0935	14.9799	0.41503	-1.26871	0.0287845	0.112288	scaf12	4019378	4029846	-	1566	-	GO:0016020;GO:0016021;GO:0016021;GO:0016021;GO:0022857;GO:0022857;GO:0055085;GO:0055085;	-	-	-	-	-	-
BGIBMGA009015	30.383	42.3249	18.4412	0.435706	-1.19857	0.0288657	0.112498	scaf17	4221835	4227340	+	1605	-	-	-	-	-	-	-	-
BGIBMGA012923	11.9957	19.1506	4.84092	0.252782	-1.98403	0.0290888	0.112996	scaf4	373656	379075	+	894	-	GO:0004252;GO:0004252;GO:0006508;GO:0006508;	-	-	-	-	-	-
BGIBMGA000376	25.2701	35.9602	14.5799	0.405446	-1.30242	0.0293172	0.113609	scaf18	857277	864205	+	1536	-	GO:0003676;GO:0003676;GO:0005515;	-	-	-	-	-	-
BGIBMGA003369	9.80221	16.2615	3.34293	0.205573	-2.28227	0.0293503	0.11367	scaf42	353394	369139	-	2442	-	GO:0005216;GO:0005216;GO:0005515;GO:0006811;GO:0006811;GO:0006811;GO:0016020;GO:0016020;GO:0016020;GO:0016021;GO:0016021;GO:0016021;GO:0034220;GO:0055085;GO:0055085;	-	-	-	-	-	-
BGIBMGA010917	4.61197	8.70557	0.518378	0.0595455	-4.06986	0.030656	0.117351	scaf68	1487411	1491745	-	552	-	-	-	-	-	-	-	-
BGIBMGA008119	4.59864	8.67891	0.518378	0.0597285	-4.06544	0.0308181	0.117831	scaf52	2767045	2769087	-	2043	-	GO:0016020;GO:0016021;GO:0016021;	-	-	-	-	-	-
BGIBMGA001385	5.61342	10.1901	1.03676	0.101742	-3.29702	0.0308849	0.117943	scaf7	8296625	8301099	-	1413	-	GO:0016491;GO:0016491;GO:0055114;GO:0055114;	-	-	-	-	-	101736057
BGIBMGA008988	30.1379	43.851	16.4248	0.37456	-1.41673	0.0308931	0.117943	scaf17	2484952	2489172	+	1245	-	GO:0003824;GO:0003824;GO:0005515;GO:0005975;GO:0005975;	-	-	-	-	-	-
BGIBMGA012756	20.1382	29.5006	10.7757	0.365272	-1.45296	0.0310191	0.118249	scaf4	8907164	8924248	-	1644	-	GO:0016020;GO:0016021;GO:0016021;	-	-	-	-	-	-
BGIBMGA010609	5.58676	10.1368	1.03676	0.102277	-3.28945	0.0311553	0.118698	scaf84	1347360	1352990	-	1005	-	GO:0004984;GO:0004984;GO:0005549;GO:0005549;GO:0007165;GO:0007608;GO:0007608;GO:0007608;GO:0016020;GO:0016020;GO:0016020;GO:0016021;GO:0016021;GO:0050896;GO:0050911;	-	-	-	-	-	-
BGIBMGA002955	5.57152	10.1634	0.979613	0.096386	-3.37503	0.0313114	0.119152	scaf13	6243973	6249850	-	804	-	GO:0005576;GO:0005576;	K19919	-	-	-	-	101746068
BGIBMGA005025	4.55674	8.65225	0.461235	0.0533081	-4.2295	0.0313358	0.119209	scaf32	3673368	3674279	-	627	-	-	-	-	-	-	-	-
BGIBMGA003150	74.3531	101.619	47.0867	0.463364	-1.10978	0.0313914	0.119386	scaf13	4176561	4177109	+	399	-	-	-	-	-	-	-	-
BGIBMGA003039	55.0518	76.5723	33.5313	0.437904	-1.19131	0.031739	0.120494	scaf13	2925505	2976350	-	11166	-	GO:0003777;GO:0003777;GO:0005524;GO:0005524;GO:0007018;GO:0007018;GO:0030286;GO:0030286;	-	-	-	-	-	-
BGIBMGA012284	18.0593	31.8532	4.2654	0.133908	-2.90069	0.0318049	0.120709	scaf26	866104	868152	-	1053	-	-	-	-	-	-	-	-
BGIBMGA005364	15.3872	23.4559	7.31852	0.312012	-1.68032	0.0329078	0.123864	scaf19	2044028	2049560	-	615	-	-	-	-	-	-	-	-
BGIBMGA009502	3.32311	6.64622	0	0	-Inf	0.032913	0.123864	scaf40	1645246	1656735	+	1566	-	GO:0005524;GO:0005524;GO:0016020;GO:0016021;GO:0016021;GO:0016021;GO:0016887;GO:0016887;GO:0042626;GO:0042626;GO:0055085;GO:0055085;	-	-	-	-	-	-
BGIBMGA009784	3.32311	6.64622	0	0	-Inf	0.032913	0.123864	scaf27	3762122	3762777	+	231	-	-	-	-	-	-	-	-
BGIBMGA002956	15.3853	23.5092	7.26138	0.308874	-1.69491	0.0329149	0.123864	scaf13	6226651	6242728	-	3633	-	GO:0003824;GO:0003824;GO:0005515;	-	-	-	-	-	-
BGIBMGA001247	522.413	740.759	304.068	0.410482	-1.28461	0.0329543	0.123941	scaf1	11132588	11141094	+	1473	-	-	-	-	-	-	-	-
BGIBMGA006266	12.5366	19.8853	5.18787	0.260889	-1.93849	0.0330303	0.124189	scaf49	1971994	1978294	-	1239	-	-	-	-	-	-	-	101741944
BGIBMGA014571	8.10578	13.734	2.4776	0.1804	-2.47073	0.0332842	0.125034	scaf497	14501	16859	+	288	-	GO:0004252;GO:0004252;GO:0006508;GO:0006508;	-	-	-	-	-	-
BGIBMGA012679	3.29645	6.5929	0	0	-Inf	0.0333787	0.12528	scaf69	910811	911969	-	1110	-	-	-	-	-	-	-	-
BGIBMGA000713	3.28312	6.56624	0	0	-Inf	0.0336153	0.125984	scaf8	5967753	5971819	+	447	-	-	-	-	-	-	-	-
BGIBMGA005730	11.1581	17.8793	4.43683	0.248154	-2.01069	0.0338315	0.1265	scaf123	266128	267333	-	840	-	-	K00079	-	-	-	-	101738709
BGIBMGA002748	23.1261	32.8845	13.3676	0.406502	-1.29866	0.0341861	0.127419	scaf117	469424	486163	+	4560	-	GO:0005509;GO:0005509;GO:0005886;GO:0005886;GO:0007155;GO:0007155;GO:0007156;GO:0007156;GO:0016020;GO:0016020;GO:0016020;GO:0016021;GO:0016021;	-	-	-	-	-	-
BGIBMGA010876	9.5986	15.74	3.45722	0.219645	-2.18675	0.0346145	0.128681	scaf61	14053	15607	-	1311	-	GO:0005576;GO:0005576;	-	-	-	-	30K protein 12[Source:UniProtKB/TrEMBL;Acc:H9B445]	101739532
BGIBMGA004855	16.5488	24.9137	8.18385	0.328488	-1.60609	0.0349488	0.129624	scaf46	1211515	1216068	+	894	-	-	-	-	-	-	-	-
BGIBMGA001314	9.4729	15.66	3.28579	0.20982	-2.25277	0.035425	0.131013	scaf139	53892	61073	-	567	-	GO:0016020;GO:0016021;GO:0016021;	-	-	-	-	-	-
BGIBMGA008471	6.33888	11.1798	1.49799	0.133991	-2.89979	0.0357523	0.131944	scaf2	3839035	3844631	+	918	-	GO:0004252;GO:0004252;GO:0006508;GO:0006508;	-	-	-	-	-	-
BGIBMGA011108	28.6161	39.7707	17.4616	0.439057	-1.18752	0.0357586	0.131944	scaf95	1157313	1162906	-	750	-	-	-	-	-	-	-	-
BGIBMGA001592	58.0237	81.814	34.2334	0.418429	-1.25694	0.0360272	0.132745	scaf7	7120141	7123385	+	858	-	GO:0042626;GO:0042626;GO:0055085;	K02149	-	-	-	Vacuolar ATP synthase subunit D[Source:UniProtKB/TrEMBL;Acc:Q1HPT6]	733120
BGIBMGA002576	6.29889	11.0998	1.49799	0.134957	-2.88943	0.0361518	0.133014	scaf20	4928483	4945371	-	1965	-	GO:0003997;GO:0003997;GO:0005777;GO:0005777;GO:0006631;GO:0006631;GO:0006635;GO:0006635;GO:0016627;GO:0016627;GO:0050660;GO:0050660;GO:0055114;GO:0055114;GO:0071949;GO:0071949;	-	-	-	-	Acyl-coenzyme A oxidase[Source:UniProtKB/TrEMBL;Acc:H9IZ91]	-
BGIBMGA000238	12.6255	23.6958	1.55513	0.065629	-3.92952	0.0376394	0.137506	scaf18	4599000	4611061	-	1458	-	GO:0004601;GO:0004601;GO:0006979;GO:0006979;GO:0020037;GO:0020037;GO:0042600;GO:0042600;GO:0055114;GO:0055114;GO:0098869;	-	-	-	-	-	-
BGIBMGA000686	58.1757	79.2364	37.1151	0.46841	-1.09416	0.0385078	0.140004	scaf8	4610849	4619793	+	1590	-	-	-	-	-	-	-	-
BGIBMGA008617	26.2812	37.3498	15.2126	0.4073	-1.29584	0.0386409	0.14021	scaf136	181378	185559	-	1305	-	-	-	-	-	-	-	-
BGIBMGA006759	7.03768	12.1161	1.95923	0.161704	-2.62857	0.0391216	0.141676	scaf10	5292801	5300605	+	1422	-	-	-	-	-	-	-	-
BGIBMGA009884	10.884	17.3312	4.43683	0.256003	-1.96577	0.039892	0.143578	scaf51	921662	935049	+	1323	-	GO:0000166;GO:0003774;GO:0003777;GO:0003777;GO:0005524;GO:0005524;GO:0005524;GO:0005874;GO:0005874;GO:0007018;GO:0007018;GO:0008017;GO:0008017;	-	-	-	-	-	-
BGIBMGA009464	9.53542	16.0749	2.99598	0.186377	-2.42371	0.0406987	0.14587	scaf40	1241264	1247001	-	933	-	-	-	-	-	-	-	-
BGIBMGA003444	4.26933	8.07742	0.461235	0.0571017	-4.13032	0.0407804	0.146122	scaf9	8072944	8073949	-	333	-	-	-	-	-	-	-	-
BGIBMGA006854	36.0089	48.103	23.9148	0.497158	-1.00822	0.0410873	0.14714	scaf70	634876	636767	+	336	-	-	-	-	-	-	-	-
BGIBMGA008482	9.2788	15.2718	3.28579	0.215154	-2.21656	0.0416237	0.148607	scaf2	4459291	4463978	+	606	-	GO:0003677;GO:0003677;GO:0003677;GO:0005634;GO:0005634;GO:0006355;GO:0006355;GO:0043565;GO:0043565;	K09339	-	-	-	-	101744413
BGIBMGA001059	13.4851	20.6884	6.28177	0.303637	-1.71958	0.0417747	0.149104	scaf1	1716839	1725401	-	1185	-	-	-	-	-	-	-	-
BGIBMGA007365	22.8503	32.1614	13.5391	0.420972	-1.2482	0.0422286	0.150474	scaf55	1158943	1168708	-	1326	-	GO:0004252;GO:0004252;GO:0006508;GO:0006508;	-	-	-	-	-	-
BGIBMGA005783	23.8842	33.5926	14.1758	0.421992	-1.24471	0.0428022	0.152056	scaf54	21626	21961	+	336	-	-	-	-	-	-	-	-
BGIBMGA002168	14.799	22.2796	7.31852	0.328486	-1.6061	0.0437787	0.154884	scaf64	1708687	1710069	-	1383	-	GO:0003676;GO:0003676;	-	-	-	-	-	101737149
BGIBMGA003629	3.0357	6.0714	0	0	-Inf	0.0447953	0.157572	scaf9	1833676	1847254	+	1848	-	GO:0005887;GO:0005887;GO:0006811;GO:0006811;GO:0015379;GO:0015379;GO:0016020;GO:0016020;GO:0016020;GO:0016021;GO:0016021;GO:0016021;GO:0055085;GO:0055085;GO:0071477;GO:0071477;GO:0071805;GO:1902476;GO:1902476;	-	-	-	-	-	-
BGIBMGA001162	34.8759	63.1231	6.62872	0.105012	-3.25137	0.0448828	0.157836	scaf1	7064612	7073791	+	1671	CYP4G25	GO:0004497;GO:0004497;GO:0005506;GO:0005506;GO:0016020;GO:0016021;GO:0016021;GO:0016491;GO:0016705;GO:0016705;GO:0020037;GO:0020037;GO:0046872;GO:0055114;GO:0055114;GO:0055114;	-	-	-	-	Cytochrome P450[Source:UniProtKB/TrEMBL;Acc:H9IV82]	-
BGIBMGA003100	17.3714	28.7509	5.99196	0.20841	-2.26251	0.0453776	0.159099	scaf13	2173261	2180517	+	1389	-	GO:0005515;	-	-	-	-	-	-
BGIBMGA009510	12.5006	19.4705	5.53073	0.284057	-1.81575	0.0462647	0.161375	scaf40	1842557	1843848	+	630	-	-	-	-	-	-	-	-
BGIBMGA013903	6.82074	11.568	2.07351	0.179246	-2.47999	0.0471902	0.163717	scaf29	2683665	2686002	-	1044	SERPIN-31	GO:0005615;GO:0005615;	K04525	-	-	-	Serpin-31 [Source:UniProtKB/TrEMBL;Acc:C0J8I0]"	100272195
BGIBMGA009815	6.81501	11.7279	1.90208	0.162184	-2.6243	0.0472538	0.16385	scaf161	61393	67930	+	2655	-	GO:0005524;GO:0005524;GO:0006298;GO:0006298;GO:0030983;GO:0030983;	-	-	-	-	-	-
BGIBMGA003912	21.3003	30.1554	12.4452	0.412701	-1.27683	0.047361	0.164133	scaf114	393757	401486	-	246	-	-	-	-	-	-	-	-
BGIBMGA007499	30.4309	41.845	19.0167	0.454457	-1.13778	0.0474985	0.164521	scaf66	1485746	1487768	-	537	-	-	-	-	-	-	-	-
BGIBMGA009415	10.4442	16.623	4.2654	0.256596	-1.96243	0.0481222	0.166101	scaf81	688467	696971	+	1158	-	-	-	-	-	-	-	-
BGIBMGA002688	7.59952	12.6643	2.53475	0.200149	-2.32085	0.0483908	0.166894	scaf20	2607217	2607405	+	189	-	-	-	-	-	-	-	-
BGIBMGA003455	7.57095	12.6643	2.4776	0.195637	-2.35375	0.0486796	0.167621	scaf9	7226387	7229703	-	1578	-	GO:0005622;GO:0005622;GO:0007155;GO:0007155;GO:0007266;GO:0007266;GO:0051015;GO:0051015;	-	-	-	-	-	-
BGIBMGA009919	25.0103	36.8816	13.1391	0.356249	-1.48904	0.049957	0.170877	scaf51	2418897	2419244	+	285	-	-	-	-	-	-	-	-
