# Supplementary material for: Corona or hydrochloric acid modulates embryonic diapause in silkworms by activating different signaling pathways
Source: PeerJ. 2025 Feb 20;13:e18966. doi: 10.7717/peerj.18966 (PMC11847486; doi:10.7717/peerj.18966)
Supplement: Table S11 [file peerj-13-18966-s012.xlsx]

## Sheet: Sheet1
id	baseMean	baseMeanA	baseMeanB	foldChange	log2FoldChange	pval	padj	Chromosome	Start Site	End Site	Direction	Length	Name	GO	KEGG	EC	eggNOG Class	eggNOG	Description	NCBI_GI
BGIBMGA010154	1379.66	536.654	2222.66	4.1417	2.05022	6.56219e-51	9.40872e-48	scaf15	2534231	2534834	-	444	-	GO:0004170;GO:0004170;GO:0046080;GO:0046080;	K01520	EC:3.6.1.23	-	-	-	101741979
BGIBMGA000391	1189.28	492.996	1885.57	3.82471	1.93535	6.62167e-44	6.57277e-41	scaf18	1492145	1508728	+	2928	-	GO:0003824;GO:0003824;GO:0004375;GO:0004375;GO:0004375;GO:0005739;GO:0005739;GO:0006520;GO:0006520;GO:0006544;GO:0006544;GO:0006546;GO:0006546;GO:0016491;GO:0016829;GO:0016829;GO:0055114;GO:0055114;GO:0055114;	-	-	-	-	-	-
BGIBMGA010933	737.661	228.406	1246.92	5.45921	2.44869	7.25107e-43	6.23786e-40	scaf68	173739	183779	-	2052	-	GO:0016020;GO:0016021;GO:0016021;GO:0016021;GO:0055085;GO:0055085;	-	-	-	-	-	-
BGIBMGA013134	1427.31	639.878	2214.73	3.46118	1.79127	6.87534e-41	4.92886e-38	scaf124	177740	181773	+	960	CDC2	GO:0000166;GO:0004672;GO:0004672;GO:0004674;GO:0004674;GO:0005524;GO:0005524;GO:0005524;GO:0006468;GO:0006468;	K02087	-	-	-	Bm cdc2 [Source:UniProtKB/TrEMBL;Acc:O17507]"	693060
BGIBMGA013449	5594.97	2590.89	8599.04	3.31895	1.73073	1.04394e-38	6.41474e-36	scaf111	177836	179225	-	396	HIS2AV	GO:0000786;GO:0000786;GO:0000786;GO:0003677;GO:0003677;GO:0003677;GO:0005634;GO:0005634;GO:0005634;GO:0005694;GO:0046982;GO:0046982;	-	-	-	-	Histone H2A [Source:UniProtKB/TrEMBL;Acc:H9JV86]"	-
BGIBMGA009310	904.17	422.566	1385.77	3.27942	1.71344	1.35318e-31	5.82046e-29	scaf53	2519707	2521644	-	1938	-	GO:0004672;GO:0004672;GO:0005524;GO:0005524;GO:0006468;GO:0006468;	-	-	-	-	-	-
BGIBMGA007393	2982.92	1647.31	4318.52	2.62156	1.39043	2.29272e-31	9.54365e-29	scaf55	508118	508483	+	366	-	GO:0003677;GO:0003677;GO:0005634;GO:0005634;	K11295	-	-	-	-	101739065
BGIBMGA007000	895.396	421.658	1369.13	3.24702	1.69912	4.07488e-31	1.6432e-28	scaf21	3459444	3464365	-	1140	-	GO:0005515;	-	-	-	-	-	-
BGIBMGA010464	5790.55	3170.39	8410.71	2.6529	1.40757	1.16594e-30	4.42509e-28	scaf6	1045301	1047007	-	345	-	-	-	-	-	-	-	101744904
BGIBMGA005151	1042.7	510.018	1575.38	3.08887	1.62708	1.5603e-30	5.7526e-28	scaf32	2848376	2856304	+	2028	-	GO:0000166;GO:0003677;GO:0003677;GO:0003677;GO:0003688;GO:0003688;GO:0004386;GO:0004386;GO:0005524;GO:0005524;GO:0005524;GO:0005634;GO:0005634;GO:0005634;GO:0006260;GO:0006260;GO:0006260;GO:0006270;GO:0006270;GO:0016787;GO:0042555;GO:0042555;	-	-	-	-	-	-
BGIBMGA000462	944.779	476.34	1413.22	2.96683	1.56892	9.35349e-28	2.90858e-25	scaf18	4855528	4864623	+	684	-	GO:0005576;GO:0005576;	-	-	-	-	27 kDa glycoprotein [Source:UniProtKB/Swiss-Prot;Acc:Q8T113]	692422
BGIBMGA011920	2175.86	1188.44	3163.28	2.66172	1.41236	3.32737e-27	9.1354e-25	scaf59	941566	947300	-	1140	-	GO:0003676;GO:0003676;GO:0003723;GO:0003723;GO:0005730;GO:0005730;GO:0008270;GO:0008270;GO:0042254;GO:0042254;GO:0046872;GO:0046872;GO:0046872;GO:1990904;GO:1990904;	-	-	-	-	-	-
BGIBMGA001324	3675.16	2162.31	5188.01	2.39928	1.2626	4.61849e-27	1.2416e-24	scaf139	325065	333260	+	711	-	-	-	-	-	-	-	692495
BGIBMGA002602	7372.69	4497.1	10248.3	2.27886	1.18832	1.01779e-26	2.62671e-24	scaf20	2581921	2585372	-	579	-	-	-	-	-	-	-	-
BGIBMGA003385	2097.23	1195.1	2999.36	2.50971	1.32752	1.4122e-26	3.57313e-24	scaf42	415187	420533	+	1380	-	GO:0004672;GO:0004672;GO:0005515;GO:0005524;GO:0005524;GO:0006468;GO:0006468;	-	-	-	-	-	-
BGIBMGA012045	1377.81	753.949	2001.66	2.6549	1.40866	3.09806e-26	7.68795e-24	scaf24	3002575	3003271	-	267	-	GO:0000387;GO:0000387;GO:0000398;GO:0000398;GO:0003723;GO:0003723;GO:0005634;GO:0005681;GO:0005681;GO:0005681;GO:0005732;GO:0005732;GO:0006397;GO:0008380;	K11098	-	-	-	Small nuclear ribonucleoprotein protein F[Source:UniProtKB/TrEMBL;Acc:Q1HPQ7]	100101178
BGIBMGA011897	644.851	298.525	991.178	3.32025	1.73129	4.11015e-26	9.82173e-24	scaf59	2001517	2002739	-	492	-	GO:0006974;GO:0006974;GO:0051726;GO:0051726;	-	-	-	-	-	-
BGIBMGA006813	1261.79	689.188	1834.39	2.66168	1.41233	6.78076e-26	1.59089e-23	scaf70	1336534	1344733	-	2826	-	GO:0005515;GO:0005643;GO:0005643;GO:0006913;GO:0006913;GO:0017056;GO:0017056;	-	-	-	-	-	-
BGIBMGA002350	761.012	378.27	1143.75	3.02364	1.59629	7.1017e-26	1.63644e-23	scaf337	13927	17080	+	759	-	GO:0000166;GO:0000278;GO:0004672;GO:0004672;GO:0004674;GO:0004674;GO:0004674;GO:0005524;GO:0005524;GO:0005524;GO:0006468;GO:0006468;GO:0007094;GO:0007094;GO:0031577;GO:0032133;GO:0032133;GO:0032467;GO:0032467;GO:0043988;GO:0043988;	-	-	-	-	-	-
BGIBMGA004566	105.46	14.5388	196.381	13.5074	3.75568	2.37041e-25	5.36627e-23	scaf48	974298	975383	-	1086	-	GO:0016020;GO:0016021;GO:0016021;GO:0016021;GO:0022857;GO:0022857;GO:0055085;GO:0055085;	-	-	-	-	-	-
BGIBMGA004302	2034.85	1188.42	2881.28	2.42447	1.27767	5.8182e-25	1.23079e-22	scaf79	526019	530206	-	999	-	GO:0003676;GO:0003676;GO:0003723;GO:0003723;GO:0003743;GO:0003743;GO:0006413;	K03237	-	-	-	-	693063
BGIBMGA012734	1236.06	691.468	1780.65	2.57518	1.36467	4.74558e-24	9.56828e-22	scaf93	475685	479203	-	612	-	GO:0007094;GO:0007094;	-	-	-	-	-	-
BGIBMGA012032	745.483	384.454	1106.51	2.87814	1.52513	7.3887e-24	1.4446e-21	scaf24	3749419	3749730	-	312	-	GO:0005524;GO:0005524;GO:0005737;GO:0005737;GO:0006457;GO:0006457;	K04078	-	-	-	-	101745352
BGIBMGA008443	1119.27	621.716	1616.82	2.60057	1.37883	2.18159e-23	3.96497e-21	scaf2	1823020	1824613	+	1071	-	GO:0005634;GO:0005634;GO:0031144;GO:0031144;GO:0071630;GO:0071630;	-	-	-	-	-	101738001
BGIBMGA014378	1317.73	550.555	2084.9	3.7869	1.92102	4.97465e-23	8.79354e-21	scaf155	310943	317264	+	924	-	-	-	-	-	-	-	-
BGIBMGA005444	336.32	139.721	532.919	3.81417	1.93137	7.43399e-23	1.26631e-20	scaf19	1630820	1632747	+	1233	-	GO:0016491;GO:0016627;GO:0016627;GO:0050660;GO:0050660;GO:0050660;GO:0055114;GO:0055114;GO:0055114;	-	-	-	-	-	-
BGIBMGA013510	2014.69	834.23	3195.15	3.83005	1.93737	7.45812e-23	1.26631e-20	scaf101	165625	174329	+	1128	BMRNRS	GO:0009263;GO:0009263;GO:0016491;GO:0016491;GO:0055114;GO:0055114;	K10808	EC:1.17.4.1	-	-	Ribonucleoside diphosphate reductase small subunit[Source:UniProtKB/TrEMBL;Acc:H9JVE7]	100873153
BGIBMGA009323	363.669	159.155	568.182	3.56999	1.83592	3.72658e-22	5.79371e-20	scaf53	1729955	1737712	-	732	-	GO:0004616;GO:0050661;GO:0050661;	-	-	-	-	-	-
BGIBMGA001695	1424.5	833.074	2015.93	2.41987	1.27493	4.16836e-22	6.40339e-20	scaf35	496476	501713	-	1953	-	GO:0003824;GO:0003824;GO:0004559;GO:0004559;GO:0005975;GO:0005975;GO:0006013;GO:0006013;GO:0030246;GO:0030246;	-	-	-	-	-	-
BGIBMGA004034	78.7314	8.27303	149.19	18.0333	4.17259	4.96462e-22	7.44924e-20	scaf36	820725	841519	-	849	-	GO:0004930;GO:0004930;GO:0007186;GO:0007186;GO:0008528;GO:0008528;GO:0016020;GO:0016021;GO:0016021;GO:0016021;	-	-	-	-	-	-
BGIBMGA013453	631.126	326.76	935.492	2.86293	1.51749	9.42465e-22	1.382e-19	scaf111	34350	40085	-	909	CDK2	GO:0000166;GO:0004672;GO:0004672;GO:0004674;GO:0004674;GO:0005524;GO:0005524;GO:0005524;GO:0006468;GO:0006468;GO:0016301;GO:0016310;	K02206	EC:2.7.11.22	-	-	Cyclin dependent kinase 2[Source:UniProtKB/TrEMBL;Acc:H6VMF4]	101738936
BGIBMGA003746	1501.04	899.175	2102.91	2.33871	1.22572	2.64151e-21	3.62617e-19	scaf9	7400897	7402390	+	1272	-	-	-	-	-	-	-	101740936
BGIBMGA005726	667.318	354.765	979.871	2.76203	1.46573	3.47935e-21	4.67683e-19	scaf123	567680	586782	-	2910	-	GO:0000166;GO:0000166;GO:0000166;GO:0005524;GO:0005524;GO:0006812;GO:0006812;GO:0016020;GO:0016021;GO:0016021;GO:0016021;GO:0016787;GO:0016887;GO:0016887;GO:0046872;GO:0046872;	-	-	-	-	-	-
BGIBMGA000964	859.289	477.709	1240.87	2.59754	1.37715	4.18266e-21	5.45183e-19	scaf1	8153334	8163530	-	5865	-	-	-	-	-	-	-	-
BGIBMGA006173	1299.19	771.893	1826.48	2.36624	1.2426	1.02728e-20	1.2952e-18	scaf5	5761547	5762644	+	867	-	GO:0003676;GO:0003676;GO:0003746;GO:0003746;GO:0005634;GO:0005634;GO:0005634;GO:0006351;GO:0006351;GO:0006355;GO:0006355;GO:0006414;GO:0008270;GO:0008270;GO:0046872;	K03145	-	-	-	Transcription elongation factor S-II[Source:UniProtKB/TrEMBL;Acc:Q1HQ13]	732942
BGIBMGA007541	1083.66	627.604	1539.71	2.45332	1.29473	1.21717e-20	1.46788e-18	scaf66	301158	302929	-	990	-	-	-	-	-	-	-	-
BGIBMGA011219	1292.69	767.502	1817.88	2.36857	1.24402	1.7563e-20	2.0603e-18	scaf12	4335952	4340859	-	1869	-	-	-	-	-	-	-	101739044
BGIBMGA011581	8050.03	5307	10793.1	2.03374	1.02413	1.90447e-20	2.19422e-18	scaf22	4387289	4388301	+	276	SMT3	GO:0005515;GO:0005634;GO:0005634;GO:0016925;GO:0016925;	K12160	-	-	-	SUMO; Small ubiquitin-like modifier protein;Ubiquitin-like protein SMT3[Source:UniProtKB/TrEMBL;Acc:Q2VEW6]	692976
BGIBMGA013605	1088.83	638.087	1539.58	2.4128	1.27071	3.36076e-20	3.67892e-18	scaf78	99520	102832	-	963	-	GO:0003723;GO:0003723;GO:0003723;GO:0003743;GO:0003743;GO:0003743;GO:0005737;GO:0005737;GO:0006412;GO:0006413;GO:0006413;GO:0006413;	-	-	-	-	-	-
BGIBMGA003946	979.819	566.451	1393.19	2.4595	1.29837	6.14981e-20	6.55844e-18	scaf105	230268	230822	-	411	IAP2	-	-	-	-	-	Survivin-2 [Source:UniProtKB/TrEMBL;Acc:E9JEI2]"	-
BGIBMGA013782	1152.58	555.814	1749.35	3.14737	1.65415	6.23055e-20	6.59008e-18	scaf47	566821	567177	+	357	-	-	-	-	-	-	-	101746461
BGIBMGA001457	810.931	457.393	1164.47	2.54588	1.34817	7.66114e-20	8.03735e-18	scaf7	1991453	1997168	-	1911	-	-	-	-	-	-	-	-
BGIBMGA010621	1812.22	1126.93	2497.51	2.2162	1.14809	8.16304e-20	8.49483e-18	scaf84	916712	921764	-	2397	BMO.4128	GO:0000166;GO:0004748;GO:0004748;GO:0004748;GO:0005524;GO:0005524;GO:0005524;GO:0006260;GO:0006260;GO:0006260;GO:0016491;GO:0055114;GO:0055114;GO:0055114;	K10807	EC:1.17.4.1	-	-	Ribonucleoside-diphosphate reductase[Source:UniProtKB/TrEMBL;Acc:H9JM68]	101741714
BGIBMGA004695	5387.69	3556.06	7219.32	2.03015	1.02158	1.58812e-19	1.60102e-17	scaf108	177246	177724	-	345	HMGA	GO:0003677;GO:0003677;	K09283	-	-	-	HMGA [Source:UniProtKB/TrEMBL;Acc:A9X4T2]"	100134920
BGIBMGA005594	908.619	453.286	1363.95	3.00903	1.5893	2.74211e-19	2.70108e-17	scaf33	72565	86332	-	2991	-	GO:0005515;GO:0007051;GO:0007051;	-	-	-	-	-	-
BGIBMGA014551	4265.46	2804.26	5726.66	2.04213	1.03007	2.8799e-19	2.81532e-17	scaf419	18400	18795	+	396	BMPP	-	-	-	-	-	Paralytic peptide; Precursor of insect cytokineparalytic peptide [Source:UniProtKB/TrEMBL;Acc:Q95YI2]	692427
BGIBMGA012164	717.161	400.838	1033.48	2.57831	1.36642	4.03034e-19	3.87961e-17	scaf75	581534	583836	-	375	-	-	-	-	-	-	-	-
BGIBMGA011589	5823.05	2644.7	9001.4	3.40356	1.76704	5.27907e-19	4.97234e-17	scaf22	4875833	4877474	+	351	-	-	-	-	-	-	-	101740613
BGIBMGA006677	586.653	317.512	855.795	2.69532	1.43045	7.633e-19	6.98555e-17	scaf10	543515	545744	+	963	-	GO:0000278;GO:0000278;GO:0004672;GO:0004672;GO:0004674;GO:0004674;GO:0005524;GO:0005524;GO:0006468;GO:0006468;	K08865	EC:2.7.12.2	-	-	-	101736944
BGIBMGA014115	2577.24	1425.15	3729.33	2.61679	1.3878	9.0012e-19	8.17969e-17	scaf76	114373	123093	-	1149	-	GO:0004553;GO:0004553;GO:0004563;GO:0004563;GO:0005975;GO:0005975;	-	-	-	-	-	-
BGIBMGA003747	1426.14	816.448	2035.83	2.49352	1.31818	1.05489e-18	9.51909e-17	scaf9	7415673	7421508	+	1578	-	GO:0005634;GO:0005634;	K21770	-	-	-	Cyclin B homolog[Source:UniProtKB/TrEMBL;Acc:P92162]	692763
BGIBMGA004765	2168.59	1388.97	2948.21	2.12259	1.08582	1.18074e-18	1.05808e-16	scaf57	286569	298201	+	3384	-	GO:0005515;GO:0005524;GO:0005524;GO:0005694;GO:0005694;GO:0051276;GO:0051276;	-	-	-	-	-	-
BGIBMGA000081	334.656	157.514	511.797	3.24921	1.70009	2.69448e-18	2.36528e-16	scaf43	2010028	2010387	-	360	-	GO:0005634;GO:0005634;GO:0046982;GO:0046982;	K02326	EC:2.7.7.7	-	-	-	101741556
BGIBMGA003927	198.017	7.16103	388.872	54.3039	5.76299	2.79094e-18	2.4334e-16	scaf249	41510	53374	+	1299	FMO3	GO:0004497;GO:0004499;GO:0004499;GO:0016491;GO:0050660;GO:0050660;GO:0050661;GO:0050661;GO:0055114;GO:0055114;GO:0055114;	-	-	-	-	Flavin-dependent monooxygenase FMO3A[Source:UniProtKB/TrEMBL;Acc:D7PGZ6]	-
BGIBMGA001202	520.097	278.477	761.716	2.73529	1.45169	3.30437e-18	2.84264e-16	scaf1	8961319	8968471	+	1554	-	GO:0046872;GO:0046872;	-	-	-	-	-	-
BGIBMGA000899	570.371	312.627	828.114	2.64888	1.40539	4.20294e-18	3.5917e-16	scaf1	11056781	11060455	-	2175	-	-	-	-	-	-	-	-
BGIBMGA005038	1601.23	1015.79	2186.67	2.15268	1.10614	5.84399e-18	4.89681e-16	scaf32	3000944	3004368	-	1728	-	GO:0007052;	-	-	-	-	-	-
BGIBMGA004825	1356.05	844.06	1868.04	2.21316	1.14611	6.28366e-18	5.23125e-16	scaf46	820374	857499	-	6276	-	GO:0000166;GO:0000166;GO:0003676;GO:0003676;GO:0003677;GO:0003677;GO:0003677;GO:0003887;GO:0003887;GO:0003887;GO:0005634;GO:0005634;GO:0005634;GO:0006260;GO:0006260;GO:0006260;GO:0006281;GO:0006281;GO:0008270;GO:0008270;GO:0008622;GO:0008622;GO:0016740;GO:0016779;GO:0046872;GO:0051536;GO:0051539;GO:0071897;	-	-	-	-	DNA polymerase[Source:UniProtKB/TrEMBL;Acc:H9J5N5]	-
BGIBMGA006763	1582.55	978.385	2186.71	2.23502	1.16029	9.86495e-18	8.05679e-16	scaf10	5624914	5635200	+	5955	-	-	-	-	-	-	-	-
BGIBMGA000475	6277.35	3377.62	9177.07	2.71702	1.44202	1.15236e-17	9.35221e-16	scaf18	5806256	5810434	+	1197	CRT	GO:0005509;GO:0005509;GO:0005515;GO:0005783;GO:0005783;GO:0005783;GO:0006457;GO:0006457;GO:0051082;GO:0051082;	-	-	-	-	Calreticulin [Source:UniProtKB/Swiss-Prot;Acc:Q7Z1E6]	-
BGIBMGA003840	1960.23	1270.99	2649.47	2.08457	1.05975	1.20665e-17	9.73161e-16	scaf107	1047811	1048191	+	381	-	GO:0000387;GO:0000387;GO:0006396;GO:0006396;	-	-	-	-	-	-
BGIBMGA011029	1883.25	1184.47	2582.03	2.17989	1.12426	1.56563e-17	1.25484e-15	scaf31	2470870	2472657	-	1218	-	GO:0003824;GO:0003824;GO:0008152;GO:0016740;GO:0016746;GO:0016747;GO:0016747;	-	-	-	-	-	-
BGIBMGA011028	1723.13	1114.05	2332.22	2.09346	1.06589	3.2448e-17	2.53763e-15	scaf31	2499953	2535493	-	5421	-	GO:0005515;GO:0010997;GO:0010997;GO:0031145;GO:0031145;GO:0042981;GO:0042981;GO:0043531;GO:0043531;GO:0097027;GO:0097027;GO:1904668;GO:1904668;	-	-	-	-	-	-
BGIBMGA007961	317.055	151.804	482.306	3.17715	1.66774	3.60376e-17	2.80138e-15	scaf3	8977825	8979285	+	1461	-	GO:0003676;GO:0003676;GO:0003723;GO:0003723;	-	-	-	-	-	-
BGIBMGA008676	712.824	414.074	1011.57	2.44298	1.28864	3.6537e-17	2.82319e-15	scaf90	911112	912048	-	405	-	-	-	-	-	-	-	-
BGIBMGA007822	713.896	415.392	1012.4	2.43721	1.28523	4.01419e-17	3.06504e-15	scaf3	2269766	2271640	+	807	-	GO:0003676;GO:0003676;GO:0003723;GO:0003723;	-	-	-	-	-	-
BGIBMGA013237	40.8875	1.03074	80.7442	78.3359	6.2916	4.87373e-17	3.65643e-15	scaf39	1611522	1613971	+	1572	-	GO:0004497;GO:0004497;GO:0005506;GO:0005506;GO:0016020;GO:0016021;GO:0016021;GO:0016491;GO:0016705;GO:0016705;GO:0020037;GO:0020037;GO:0046872;GO:0055114;GO:0055114;GO:0055114;	-	-	-	-	-	-
BGIBMGA001609	1068.85	662.717	1474.99	2.22568	1.15424	5.70102e-17	4.20377e-15	scaf35	4110784	4112244	-	1461	-	GO:0008152;GO:0070569;GO:0070569;	-	-	-	-	-	-
BGIBMGA012019	1812.15	985.778	2638.52	2.67658	1.42039	6.67891e-17	4.89686e-15	scaf24	4760930	4777154	-	1332	-	GO:0008430;GO:0008430;	-	-	-	-	-	-
BGIBMGA014117	761.924	453.69	1070.16	2.35879	1.23805	7.3635e-17	5.36828e-15	scaf76	70699	75695	-	690	-	GO:0016311;GO:0016791;GO:0016791;	-	-	-	-	-	-
BGIBMGA008821	611.453	298.294	924.613	3.09967	1.63211	9.34438e-17	6.73631e-15	scaf113	24135	32365	+	1368	-	GO:0008152;GO:0016740;GO:0016746;GO:0016746;GO:0016746;	-	-	-	-	-	-
BGIBMGA009817	406.646	212.672	600.62	2.82416	1.49782	1.13908e-16	8.16596e-15	scaf161	98786	99190	+	405	BMRPA3	GO:0003677;GO:0003677;GO:0005634;GO:0005634;GO:0006260;GO:0006260;GO:0006281;GO:0006281;GO:0006310;GO:0006310;	K10740	-	-	-	Replication protein A small subunit[Source:UniProtKB/TrEMBL;Acc:Q5TLD1]	692486
BGIBMGA005428	1053.28	655.704	1450.87	2.21268	1.1458	1.53313e-16	1.087e-14	scaf19	1023845	1030288	+	1227	-	-	-	-	-	-	-	-
BGIBMGA006942	351.866	177.723	526.009	2.95972	1.56546	1.85325e-16	1.29969e-14	scaf44	873215	874389	+	1008	-	GO:0003676;GO:0003676;	K09195	-	-	-	-	101741557
BGIBMGA010948	115.689	32.8483	198.53	6.04383	2.59546	2.06549e-16	1.44071e-14	scaf68	1954424	1958837	+	2187	-	-	-	-	-	-	-	100327241
BGIBMGA006405	5412.27	2826.19	7998.35	2.83008	1.50084	3.18257e-16	2.16147e-14	scaf11	1954699	1958794	-	1086	-	GO:0003676;GO:0003676;GO:0003723;GO:0003723;	-	-	-	-	-	-
BGIBMGA004023	1061.95	670.839	1453.05	2.16602	1.11505	4.63408e-16	3.08238e-14	scaf36	1748630	1750290	-	753	-	-	-	-	-	-	-	101735856
BGIBMGA009514	837.696	514.992	1160.4	2.25323	1.172	6.2948e-16	4.16554e-14	scaf40	1897883	1909990	+	1674	-	GO:0003824;GO:0003824;GO:0004474;GO:0004474;GO:0006097;GO:0006097;	-	-	-	-	Malate synthase[Source:UniProtKB/TrEMBL;Acc:H9JJ13]	-
BGIBMGA004614	241.259	109.029	373.488	3.42558	1.77635	7.60724e-16	5.00836e-14	scaf128	599080	601061	-	1668	-	GO:0000166;GO:0005524;GO:0005524;	-	-	-	-	-	-
BGIBMGA001238	513.108	291.022	735.194	2.52625	1.337	1.0752e-15	6.86853e-14	scaf1	10852173	10868852	+	2058	-	GO:0000166;GO:0000166;GO:0004812;GO:0004812;GO:0004817;GO:0004817;GO:0005524;GO:0005524;GO:0006418;GO:0006418;GO:0006423;GO:0006423;	-	-	-	-	-	-
BGIBMGA000582	270.997	129.901	412.094	3.17238	1.66556	1.43562e-15	9.03669e-14	scaf8	1329639	1333212	-	1647	-	GO:0016020;GO:0016021;GO:0016021;	-	-	-	-	-	101744139
BGIBMGA002988	276.532	133.78	419.285	3.13414	1.64807	1.61334e-15	1.00573e-13	scaf13	4907488	4913847	-	525	-	GO:0016020;GO:0016020;GO:0016020;GO:0016021;GO:0016021;GO:0022857;GO:0022857;GO:0055085;GO:0055085;	-	-	-	-	-	-
BGIBMGA013204	247.417	114.82	380.014	3.30965	1.72668	2.28237e-15	1.38923e-13	scaf39	158652	162235	-	1755	-	GO:0003723;GO:0003723;	-	-	-	-	-	-
BGIBMGA008415	816.472	300.679	1332.27	4.43085	2.14758	2.61344e-15	1.58328e-13	scaf2	479588	485797	+	801	-	GO:0016020;GO:0016021;GO:0016021;GO:0022857;GO:0022857;GO:0055085;GO:0055085;	-	-	-	-	-	-
BGIBMGA009342	382.103	206.217	557.988	2.70583	1.43607	4.67559e-15	2.79323e-13	scaf53	255370	263236	-	1437	-	GO:0000030;GO:0005783;GO:0005789;GO:0005789;GO:0006506;GO:0016020;GO:0016021;GO:0016021;GO:0016757;GO:0016757;GO:0016757;	-	-	-	-	-	-
BGIBMGA011521	1116.77	646.682	1586.85	2.45383	1.29504	5.16494e-15	3.07136e-13	scaf22	610251	618137	+	1785	-	GO:0000166;GO:0004066;GO:0004066;GO:0005524;GO:0005524;GO:0006529;GO:0006529;GO:0006529;GO:0006541;GO:0006541;GO:0008652;	-	-	-	-	Asparagine synthetase[Source:UniProtKB/TrEMBL;Acc:H9JPR6]	-
BGIBMGA003032	2748.22	1726.56	3769.87	2.18346	1.12662	5.2686e-15	3.11862e-13	scaf13	3257634	3268869	-	906	-	-	-	-	-	-	-	-
BGIBMGA011193	828.091	515.781	1140.4	2.21102	1.14471	5.89656e-15	3.4586e-13	scaf12	5097413	5100019	-	2607	-	GO:0000166;GO:0000915;GO:0000915;GO:0003774;GO:0003777;GO:0003777;GO:0005524;GO:0005524;GO:0005524;GO:0005874;GO:0005874;GO:0007018;GO:0007018;GO:0008017;GO:0008017;GO:0072383;GO:0072383;	-	-	-	-	-	-
BGIBMGA012974	1156.27	749.068	1563.47	2.08722	1.06159	7.73863e-15	4.478e-13	scaf4	3119310	3141047	+	2874	-	GO:0000796;GO:0000796;GO:0007076;GO:0007076;	-	-	-	-	-	-
BGIBMGA006022	3640.17	2379.49	4900.84	2.05962	1.04238	7.81617e-15	4.47817e-13	scaf5	2327797	2331324	-	1164	-	GO:0003676;GO:0003676;GO:0003723;GO:0003723;GO:0003723;GO:0005634;GO:0005634;GO:0006396;GO:0006396;GO:1990904;GO:1990904;	-	-	-	-	-	-
BGIBMGA010738	206.472	90.3946	322.549	3.56823	1.83521	9.4204e-15	5.30833e-13	scaf25	2345886	2347933	-	1023	-	GO:0016020;GO:0016021;GO:0016021;	-	-	-	-	-	101737271
BGIBMGA014109	371.499	199.572	543.425	2.72295	1.44517	1.20683e-14	6.68364e-13	scaf76	1014802	1022009	-	1596	-	GO:0007165;GO:0007165;	-	-	-	-	-	-
BGIBMGA010298	433.97	243.23	624.711	2.5684	1.36087	1.2547e-14	6.91908e-13	scaf127	486589	492604	-	405	-	-	-	-	-	-	-	-
BGIBMGA005855	357.87	192.668	523.073	2.7149	1.4409	1.32982e-14	7.2712e-13	scaf125	24203	24825	+	198	-	-	-	-	-	-	-	-
BGIBMGA009675	507.632	295.294	719.97	2.43814	1.28578	1.41508e-14	7.70475e-13	scaf27	1875742	1886365	-	1614	-	GO:0003824;GO:0003824;GO:0008152;	-	-	-	-	-	101735849
BGIBMGA003777	679.293	417.534	941.052	2.25384	1.17238	1.71157e-14	9.08894e-13	scaf91	27230	31947	+	1536	-	GO:0000079;GO:0000079;GO:0005634;GO:0005634;GO:0010389;GO:0010389;GO:0019901;GO:0019901;	K21771	-	-	-	-	100126204
BGIBMGA009763	1219.28	800.279	1638.29	2.04715	1.03362	1.72007e-14	9.09665e-13	scaf27	2772166	2772887	+	195	-	-	-	-	-	-	-	101736864
BGIBMGA003004	4450.68	2488.94	6412.41	2.57636	1.36534	1.79559e-14	9.45727e-13	scaf13	4326807	4327346	-	540	-	-	-	-	-	-	-	-
BGIBMGA012953	246.145	118.441	373.848	3.1564	1.65828	2.33958e-14	1.21244e-12	scaf4	2303103	2305431	+	858	-	GO:0016020;GO:0016021;GO:0016021;	-	-	-	-	-	-
BGIBMGA006296	1108.09	726.54	1489.63	2.05031	1.03584	2.45344e-14	1.26132e-12	scaf49	318990	324976	+	645	-	-	-	-	-	-	-	-
BGIBMGA005972	219.483	101.406	337.56	3.32879	1.735	2.82151e-14	1.43908e-12	scaf5	5940625	5947929	-	1566	-	GO:0004672;GO:0004672;GO:0004713;GO:0004713;GO:0005524;GO:0005524;GO:0006468;GO:0006468;GO:0016020;GO:0016021;GO:0016021;GO:0018108;	-	-	-	-	-	-
BGIBMGA010352	2794.89	936.676	4653.11	4.96768	2.31257	3.35294e-14	1.69009e-12	scaf109	853867	867351	+	1284	-	GO:0004046;GO:0004046;GO:0005737;GO:0005737;GO:0006508;GO:0006508;GO:0006520;GO:0006520;GO:0008237;GO:0008237;GO:0016787;GO:0016787;	-	-	-	-	-	-
BGIBMGA007090	709.55	440.984	978.115	2.21803	1.14928	3.47706e-14	1.74584e-12	scaf21	2664675	2668241	+	915	-	GO:0003729;GO:0003729;GO:0005685;GO:0005685;GO:0006376;GO:0006376;	-	-	-	-	-	-
BGIBMGA011410	389.213	218.301	560.125	2.56584	1.35943	7.45985e-14	3.66015e-12	scaf12	6325461	6338841	+	3129	-	-	-	-	-	-	-	-
BGIBMGA008284	1085.74	552.373	1619.1	2.93117	1.55148	8.26753e-14	4.04107e-12	scaf94	1451220	1452346	+	1071	-	GO:0003676;GO:0003676;GO:0003723;GO:0003723;	-	-	-	-	-	-
BGIBMGA003396	1282.75	767.285	1798.21	2.3436	1.22873	9.73063e-14	4.68522e-12	scaf42	961368	970034	+	4140	-	GO:0000166;GO:0000166;GO:0001882;GO:0001882;GO:0003676;GO:0003676;GO:0003677;GO:0003677;GO:0003677;GO:0003887;GO:0003887;GO:0003887;GO:0005634;GO:0005634;GO:0006260;GO:0006260;GO:0006260;GO:0016740;GO:0016779;GO:0046872;GO:0046872;GO:0051536;GO:0051539;GO:0051539;GO:0071897;	-	-	-	-	DNA polymerase[Source:UniProtKB/TrEMBL;Acc:H9J1K9]	-
BGIBMGA003117	341.25	185.06	497.44	2.68799	1.42653	9.79159e-14	4.69705e-12	scaf13	2794788	2798345	+	633	-	GO:0000776;GO:0000776;GO:0034508;GO:0034508;	-	-	-	-	-	-
BGIBMGA006509	668.78	417.425	920.134	2.20431	1.14033	1.07483e-13	5.13687e-12	scaf11	4855646	4856653	+	747	-	-	-	-	-	-	-	-
BGIBMGA009467	275.859	141.605	410.113	2.89617	1.53415	1.23831e-13	5.89638e-12	scaf40	1117760	1124646	-	837	-	GO:0004342;GO:0004342;GO:0004342;GO:0005737;GO:0005737;GO:0005975;GO:0005975;GO:0005975;GO:0006044;GO:0006044;GO:0016787;	K02564	EC:3.5.99.6	-	-	-	101746460
BGIBMGA001725	293.677	155.155	432.2	2.78561	1.47799	2.86376e-13	1.31042e-11	scaf35	330370	342252	+	1260	-	GO:0008152;	-	-	-	-	-	-
BGIBMGA004036	1727.51	1142.52	2312.5	2.02404	1.01724	2.96196e-13	1.35057e-11	scaf36	563959	573174	-	1854	-	GO:0000166;GO:0003676;GO:0003676;GO:0004386;GO:0004386;GO:0005524;GO:0005524;GO:0005524;GO:0016787;	-	-	-	-	-	-
BGIBMGA007518	1337.6	792.643	1882.57	2.37505	1.24796	3.09743e-13	1.40737e-11	scaf66	1008988	1010343	-	1356	-	GO:0003676;GO:0003676;GO:0003723;GO:0003723;	-	-	-	-	-	-
BGIBMGA006109	846.898	553.89	1139.91	2.058	1.04125	6.18708e-13	2.64364e-11	scaf5	1316675	1319087	+	576	-	GO:0005634;GO:0005634;GO:0005634;	-	-	-	-	-	-
BGIBMGA007424	1514.8	999.919	2029.67	2.02984	1.02136	6.91371e-13	2.93469e-11	scaf55	1805480	1812563	+	1500	-	GO:0016020;GO:0016021;GO:0016021;	-	-	-	-	-	-
BGIBMGA014049	470.423	282.559	658.288	2.32973	1.22017	7.33339e-13	3.10262e-11	scaf218	51002	76771	+	5295	-	GO:0009166;GO:0009166;GO:0016787;GO:0016787;	-	-	-	-	-	-
BGIBMGA003656	285.645	119.756	451.534	3.77045	1.91474	8.36477e-13	3.52742e-11	scaf9	2976092	2984767	+	1068	-	GO:0003824;GO:0003824;GO:0030170;GO:0030170;	-	-	-	-	-	-
BGIBMGA000991	851.115	558.352	1143.88	2.04867	1.03469	8.52625e-13	3.5838e-11	scaf1	6804421	6811604	-	1476	-	GO:0004812;GO:0004812;GO:0005524;GO:0005524;GO:0005737;GO:0005737;GO:0006418;GO:0006418;	-	-	-	-	-	-
BGIBMGA003118	854.111	562.136	1146.09	2.03881	1.02772	9.06224e-13	3.78444e-11	scaf13	2801655	2804064	+	702	-	-	-	-	-	-	-	-
BGIBMGA001490	9659.45	6412.09	12906.8	2.01289	1.00927	9.4328e-13	3.90131e-11	scaf7	115147	120033	+	1209	FKBP45	GO:0000412;GO:0000413;GO:0003755;GO:0003755;GO:0005528;GO:0005730;GO:0016853;	K14826	EC:5.2.1.8	-	-	Peptidyl-prolyl cis-trans isomerase[Source:UniProtKB/TrEMBL;Acc:Q4JI71]	692771
BGIBMGA007431	655.159	417.18	893.139	2.14089	1.09821	1.2028e-12	4.9117e-11	scaf55	2262712	2268480	+	1314	-	GO:0005515;	-	-	-	-	-	-
BGIBMGA007955	662.022	423.04	901.005	2.12984	1.09074	1.31446e-12	5.31717e-11	scaf3	8433560	8438409	+	843	-	-	K14846	-	-	-	-	101736576
BGIBMGA005426	412.129	243.284	580.975	2.38805	1.25584	1.91455e-12	7.6251e-11	scaf19	1015805	1020139	+	1296	-	GO:0003677;GO:0003677;GO:0005634;GO:0005634;	-	-	-	-	-	-
BGIBMGA010912	814.505	509.365	1119.64	2.19812	1.13627	1.93974e-12	7.70167e-11	scaf68	2029458	2033463	-	1290	-	-	-	-	-	-	-	101735996
BGIBMGA013536	1183.49	701.789	1665.19	2.37278	1.24658	2.19555e-12	8.66402e-11	scaf101	956749	958038	+	1056	DNAJ-5	GO:0006457;GO:0006457;GO:0051082;GO:0051082;	-	-	-	-	DnaJ-5 [Source:UniProtKB/TrEMBL;Acc:H6VTP5]"	692539
BGIBMGA012118	805.946	528.311	1083.58	2.05103	1.03635	2.79607e-12	1.09335e-10	scaf24	3584008	3584964	+	666	-	GO:0003676;GO:0003676;GO:0003723;GO:0003723;	-	-	-	-	-	-
BGIBMGA000425	707.063	459.034	955.092	2.08065	1.05704	3.36262e-12	1.30304e-10	scaf18	3040504	3051120	+	933	-	GO:0008152;GO:0016020;GO:0016021;GO:0016021;GO:0016746;GO:0016746;	-	-	-	-	-	-
BGIBMGA000106	492.311	304.111	680.511	2.23771	1.16202	3.94372e-12	1.50562e-10	scaf43	470325	471423	-	282	TIM10	GO:0005739;GO:0008565;GO:0008565;GO:0015031;GO:0042719;GO:0042719;GO:0042721;GO:0042721;GO:0045039;GO:0045039;GO:0046872;GO:0046872;	K17778	-	-	-	Mitochondrial intermembrane space translocasesubunit Tim10 [Source:UniProtKB/TrEMBL;Acc:Q2F5K3]	692979
BGIBMGA000799	430.058	257.877	602.24	2.33538	1.22366	4.27292e-12	1.61694e-10	scaf89	611272	615225	+	1407	-	-	-	-	-	-	-	-
BGIBMGA005023	1504.77	980.945	2028.59	2.068	1.04824	5.27526e-12	1.9674e-10	scaf32	3693133	3695219	-	1245	-	GO:0003677;	K15263	-	-	-	-	101737668
BGIBMGA003014	55.8623	11.3111	100.413	8.87743	3.15014	6.13426e-12	2.26059e-10	scaf13	4022228	4023110	-	468	-	GO:0020037;GO:0020037;GO:0020037;GO:0046872;GO:0046872;	-	-	-	-	-	101746637
BGIBMGA012133	47.6188	7.66285	87.5748	11.4285	3.51456	7.01679e-12	2.55776e-10	scaf24	4721118	4725179	+	657	-	-	-	-	-	-	-	-
BGIBMGA003398	813.07	498.337	1127.8	2.26313	1.17832	1.06085e-11	3.81315e-10	scaf42	1034768	1036378	+	441	-	GO:0005634;GO:0005634;	K12877	-	-	-	Mago nashi; Mago-nashi-like protein[Source:UniProtKB/TrEMBL;Acc:Q5I200]	733069
BGIBMGA002754	352.343	206.38	498.307	2.41451	1.27173	1.16983e-11	4.12444e-10	scaf146	159599	163921	-	1503	-	GO:0005524;GO:0005524;	-	-	-	-	-	-
BGIBMGA003364	1195.05	780.804	1609.3	2.06108	1.0434	1.37987e-11	4.83854e-10	scaf42	478557	481878	-	582	-	-	-	-	-	-	-	-
BGIBMGA007731	1122.44	535.378	1709.5	3.19308	1.67495	1.39125e-11	4.85935e-10	scaf3	1155833	1159849	-	915	-	-	-	-	-	-	-	-
BGIBMGA001726	243.049	129.386	356.711	2.75695	1.46307	1.39333e-11	4.85935e-10	scaf35	390941	394350	+	855	-	GO:0008152;	-	-	-	-	-	-
BGIBMGA004711	901.484	465.314	1337.65	2.87473	1.52343	1.76665e-11	6.14469e-10	scaf108	400604	406369	+	1371	-	GO:0000166;GO:0003678;GO:0003678;GO:0004386;GO:0005524;GO:0005524;GO:0005524;GO:0005634;GO:0006281;GO:0006281;GO:0006325;GO:0006325;GO:0006351;GO:0006355;GO:0006974;GO:0016787;GO:0031011;GO:0031011;GO:0032508;GO:0035267;GO:0035267;GO:0043141;GO:0043141;GO:0097255;GO:0097255;	K04499	-	-	-	-	101739823
BGIBMGA008222	150.616	67.9207	233.311	3.43505	1.78033	1.99262e-11	6.89349e-10	scaf121	181241	183625	-	345	-	-	-	-	-	-	-	-
BGIBMGA012298	488.949	306.864	671.034	2.18675	1.12879	2.39607e-11	8.13656e-10	scaf26	48740	63001	-	1359	-	GO:0004616;GO:0004616;GO:0004616;GO:0006098;GO:0006098;GO:0006098;GO:0016491;GO:0016491;GO:0016491;GO:0019521;GO:0019521;GO:0050661;GO:0050661;GO:0055114;GO:0055114;GO:0055114;	-	-	-	-	6-phosphogluconate dehydrogenase, decarboxylating[Source:UniProtKB/TrEMBL;Acc:H9JRY8]	-
BGIBMGA011324	522.162	300.328	743.995	2.47727	1.30875	2.63856e-11	8.91308e-10	scaf12	1594228	1597386	+	906	-	GO:0003676;GO:0003676;GO:0003677;GO:0003677;	-	-	-	-	-	-
BGIBMGA013448	494.411	313.373	675.448	2.15541	1.10796	2.9613e-11	9.89963e-10	scaf111	182006	188797	-	954	SPARC	GO:0005509;GO:0005509;GO:0005515;GO:0005518;GO:0005518;GO:0005615;GO:0005615;GO:0007165;GO:0050840;GO:0062023;GO:0062023;	-	-	-	-	Secreted protein acidic and rich in cysteine[Source:UniProtKB/TrEMBL;Acc:Q1HPY3]	732958
BGIBMGA007194	502.962	319.911	686.014	2.14439	1.10057	3.03329e-11	1.00621e-09	scaf74	323731	336549	+	2817	-	GO:0000166;GO:0003677;GO:0004176;GO:0004176;GO:0004176;GO:0004252;GO:0004252;GO:0004252;GO:0005524;GO:0005524;GO:0005524;GO:0005739;GO:0005759;GO:0005759;GO:0006508;GO:0006508;GO:0006508;GO:0006515;GO:0006515;GO:0006515;GO:0008233;GO:0008236;GO:0016787;GO:0016887;GO:0030163;GO:0030163;GO:0034599;GO:0034599;GO:0043565;GO:0043565;GO:0051131;GO:0051131;GO:0070407;GO:0070407;	-	-	-	-	Lon protease homolog, mitochondrial[Source:UniProtKB/TrEMBL;Acc:H9JCE9]	-
BGIBMGA006539	338.473	198.881	478.064	2.40378	1.2653	3.14621e-11	1.03305e-09	scaf11	6817663	6828908	+	1944	-	GO:0006508;GO:0006508;GO:0008237;GO:0008237;GO:0008241;GO:0008241;GO:0016020;GO:0016020;GO:0016020;GO:0016021;GO:0016021;	-	-	-	-	-	-
BGIBMGA002892	649.505	427.488	871.523	2.03871	1.02766	3.1788e-11	1.0411e-09	scaf30	1740365	1747354	+	2385	-	GO:0003684;GO:0003684;GO:0006281;GO:0006281;	-	-	-	-	-	-
BGIBMGA010495	1013.47	615.481	1411.46	2.29327	1.19741	3.26579e-11	1.06688e-09	scaf6	99875	104153	+	1722	-	GO:0005515;	-	-	-	-	-	-
BGIBMGA007187	583.228	377.727	788.73	2.0881	1.06219	3.31332e-11	1.07967e-09	scaf74	158720	163534	+	837	-	GO:0006807;GO:0006807;	K13566	EC:3.5.1.3	-	-	-	101736797
BGIBMGA006681	673.516	447.209	899.824	2.01209	1.0087	3.80005e-11	1.2259e-09	scaf10	1483366	1484322	+	957	-	GO:0000166;GO:0004672;GO:0004672;GO:0004674;GO:0004674;GO:0005524;GO:0005524;GO:0005524;GO:0006468;GO:0006468;GO:0007049;	-	-	-	-	-	-
BGIBMGA007504	544.46	350.631	738.29	2.1056	1.07423	3.89011e-11	1.24871e-09	scaf66	1372840	1376595	-	762	-	-	-	-	-	-	-	101746139
BGIBMGA004896	782.142	492.319	1071.96	2.17738	1.12259	4.19955e-11	1.34136e-09	scaf65	2142449	2148893	-	2544	-	GO:0007165;GO:0007165;	K20635	-	-	-	-	101742778
BGIBMGA011536	546.66	353.422	739.898	2.09352	1.06593	4.21047e-11	1.34153e-09	scaf22	1441390	1448502	+	1302	-	-	-	-	-	-	-	-
BGIBMGA009732	134.105	58.2919	209.918	3.60115	1.84846	4.88414e-11	1.54095e-09	scaf27	551930	553655	+	1089	-	GO:0005634;GO:0005634;GO:0006338;GO:0006338;	-	-	-	-	-	-
BGIBMGA012474	586.153	386.745	785.561	2.03121	1.02234	8.44078e-11	2.56886e-09	scaf56	902336	904895	-	363	-	-	-	-	-	-	-	101742246
BGIBMGA005319	471.266	301.438	641.095	2.12679	1.08868	1.00131e-10	3.01188e-09	scaf19	4495591	4496930	-	534	-	GO:0003743;GO:0003743;GO:0006413;GO:0006413;	-	-	-	-	-	101745156
BGIBMGA004661	1141.85	758.035	1525.66	2.01265	1.00909	1.13536e-10	3.39139e-09	scaf135	175300	175587	+	288	-	GO:0000398;GO:0000398;GO:0005681;GO:0005681;	-	-	-	-	-	-
BGIBMGA009419	388.148	239.676	536.62	2.23894	1.16282	1.13537e-10	3.39139e-09	scaf81	797698	805479	+	615	-	GO:0003723;GO:0003723;GO:0005737;GO:0005737;	-	-	-	-	-	-
BGIBMGA003229	349.335	211.479	487.19	2.30373	1.20397	1.17946e-10	3.50685e-09	scaf73	984456	986959	-	2358	-	GO:0004420;GO:0004420;GO:0008299;GO:0008299;GO:0015936;GO:0015936;GO:0016020;GO:0016021;GO:0016021;GO:0016021;GO:0016616;GO:0016616;GO:0050661;GO:0050661;GO:0050662;GO:0050662;GO:0055114;GO:0055114;	-	-	-	-	-	-
BGIBMGA003319	419.689	263.681	575.698	2.18331	1.12652	1.4882e-10	4.36448e-09	scaf42	2655007	2669966	-	1176	-	GO:0003824;GO:0003824;GO:0004069;GO:0004069;GO:0006520;GO:0006520;GO:0008483;GO:0008483;GO:0008483;GO:0009058;GO:0009058;GO:0016740;GO:0030170;GO:0030170;	-	-	-	-	Aspartate aminotransferase[Source:UniProtKB/TrEMBL;Acc:H9J1D2]	-
BGIBMGA003814	151.665	72.0437	231.285	3.21035	1.68273	1.61507e-10	4.68335e-09	scaf107	729279	737871	-	900	-	GO:0006629;GO:0006629;GO:0008081;GO:0008081;GO:0008889;GO:0008889;	-	-	-	-	-	-
BGIBMGA009227	379.241	210.354	548.128	2.60574	1.38169	1.7573e-10	5.07298e-09	scaf38	1912056	1912349	-	294	-	-	-	-	-	-	-	-
BGIBMGA004202	595.32	396.484	794.156	2.003	1.00216	2.12387e-10	6.009e-09	scaf60	1267156	1272187	+	930	-	GO:0005198;GO:0005198;GO:0005515;GO:0015031;GO:0015031;GO:1904263;GO:1904263;	-	-	-	-	-	-
BGIBMGA014150	216.647	117.451	315.843	2.68916	1.42716	2.7491e-10	7.66185e-09	scaf99	884115	901868	-	3273	-	GO:0000049;GO:0000049;GO:0000166;GO:0000166;GO:0000166;GO:0002161;GO:0002161;GO:0004553;GO:0004553;GO:0004812;GO:0004812;GO:0004812;GO:0004822;GO:0004822;GO:0005524;GO:0005524;GO:0005524;GO:0005737;GO:0005737;GO:0005975;GO:0005975;GO:0006412;GO:0006418;GO:0006418;GO:0006428;GO:0006428;GO:0016874;GO:0106074;	-	-	-	-	-	-
BGIBMGA014238	265.699	153.364	378.035	2.46495	1.30156	2.7849e-10	7.7449e-09	scaf80	1040292	1054444	-	1902	-	GO:0016020;GO:0016020;GO:0016020;GO:0016021;GO:0016021;GO:0022857;GO:0022857;GO:0055085;GO:0055085;	-	-	-	-	-	-
BGIBMGA000601	398.807	250.227	547.388	2.18757	1.12933	2.79893e-10	7.76491e-09	scaf8	529573	545423	-	1434	-	GO:0000166;GO:0004672;GO:0004672;GO:0004674;GO:0004675;GO:0004675;GO:0005524;GO:0005524;GO:0005524;GO:0006468;GO:0006468;GO:0007178;GO:0007178;GO:0016020;GO:0016020;GO:0016020;GO:0016021;GO:0016021;GO:0016301;GO:0016310;GO:0016740;GO:0046872;GO:0046872;	-	-	-	-	-	-
BGIBMGA012399	249.36	141.401	357.319	2.52698	1.33742	2.80413e-10	7.76491e-09	scaf82	1673413	1676909	+	915	-	GO:0055114;GO:0055114;	-	-	-	-	-	-
BGIBMGA011483	296.168	45.136	547.2	12.1234	3.59972	3.61029e-10	9.84929e-09	scaf22	1139263	1140291	-	1029	-	GO:0016787;GO:0016787;	-	-	-	-	-	-
BGIBMGA011818	904.779	551.423	1258.13	2.28161	1.19005	4.01983e-10	1.0941e-08	scaf16	2573436	2576812	+	1767	BMCDT1	-	K10727	-	-	-	Cdc10 dependent transcript 1[Source:UniProtKB/TrEMBL;Acc:H7CHT8]	100873154
BGIBMGA007331	397.08	232.841	561.319	2.41074	1.26948	4.0274e-10	1.0941e-08	scaf55	2487833	2490314	-	1659	-	GO:0003690;GO:0003697;GO:0005634;GO:0005634;GO:0006260;GO:0006260;GO:0006270;	-	-	-	-	-	-
BGIBMGA010333	551.296	293.682	808.909	2.75437	1.46172	4.33703e-10	1.17082e-08	scaf109	84654	88531	+	684	-	GO:0000398;GO:0000398;GO:0003676;GO:0003676;GO:0003723;GO:0003723;GO:0003723;GO:0046872;GO:0046872;GO:0046872;GO:0089701;GO:0089701;	K12836	-	-	-	-	101742886
BGIBMGA005856	437.193	280.294	594.093	2.11954	1.08375	5.29125e-10	1.41656e-08	scaf125	25792	32392	+	1116	-	GO:0004672;GO:0004672;GO:0005524;GO:0005524;GO:0006468;GO:0006468;	-	-	-	-	-	-
BGIBMGA006905	421.898	240.652	603.143	2.50629	1.32555	5.45258e-10	1.45263e-08	scaf44	1915190	1921244	-	1605	-	GO:0004560;GO:0004560;GO:0005975;GO:0005975;GO:0006004;GO:0006004;	-	-	-	-	-	-
BGIBMGA011290	392.659	248.057	537.261	2.16588	1.11495	5.45973e-10	1.45263e-08	scaf12	1238482	1242210	-	2208	-	-	-	-	-	-	-	-
BGIBMGA002870	372.702	229.993	515.411	2.24099	1.16413	5.60099e-10	1.48409e-08	scaf30	782490	785396	+	2907	-	GO:0000166;GO:0000723;GO:0000723;GO:0003676;GO:0003676;GO:0003677;GO:0003677;GO:0003677;GO:0004003;GO:0004003;GO:0004003;GO:0004386;GO:0005524;GO:0005524;GO:0005524;GO:0005634;GO:0005634;GO:0005634;GO:0006139;GO:0006139;GO:0006260;GO:0006260;GO:0006281;GO:0006281;GO:0006281;GO:0006310;GO:0006310;GO:0006974;GO:0008026;GO:0008026;GO:0010569;GO:0010569;GO:0016787;GO:0016818;GO:0016818;GO:0032508;GO:…	K11136	EC:3.6.4.12	-	-	-	101736870
BGIBMGA003941	41.6666	0	83.3333	Inf	Inf	7.11235e-10	1.8692e-08	scaf105	388815	389576	-	762	-	-	K00069	EC:1.1.1.141	-	-	-	101735322
BGIBMGA003547	39.5476	6.63211	72.4631	10.9261	3.44971	7.15832e-10	1.87746e-08	scaf9	2353213	2353965	-	753	-	GO:0003677;GO:0003700;GO:0003700;GO:0005634;GO:0005634;GO:0006355;GO:0006355;GO:0043565;GO:0043565;	K09411	-	-	-	-	101741019
BGIBMGA007118	380.639	239.051	522.226	2.18458	1.12736	7.47849e-10	1.95745e-08	scaf21	4366616	4378803	+	1221	-	-	-	-	-	-	-	-
BGIBMGA001118	800.269	248.613	1351.93	5.43787	2.44304	8.38711e-10	2.17761e-08	scaf1	3831478	3840079	+	825	-	GO:0000287;GO:0000287;GO:0005737;GO:0005737;GO:0008253;GO:0008253;GO:0016311;	-	-	-	-	-	-
BGIBMGA004998	449.257	237.343	661.17	2.78571	1.47805	1.02809e-09	2.63746e-08	scaf65	1643091	1651704	+	2661	-	-	-	-	-	-	-	-
BGIBMGA007587	708.143	428.792	987.495	2.30297	1.20349	1.24506e-09	3.15026e-08	scaf66	1556836	1564132	+	2097	-	GO:0004518;GO:0004518;GO:0006281;GO:0006281;GO:0090305;	-	-	-	-	-	-
BGIBMGA013776	212.826	118.427	307.224	2.59421	1.37529	1.4442e-09	3.59308e-08	scaf47	266394	288604	+	2202	-	GO:0016020;GO:0016021;GO:0016021;	-	-	-	-	-	-
BGIBMGA001001	52.1804	13.2642	91.0966	6.86785	2.77986	1.5498e-09	3.80926e-08	scaf1	6071748	6072329	-	582	-	GO:0003677;GO:0003677;GO:0006357;GO:0006357;GO:0046983;GO:0046983;	-	-	-	-	-	-
BGIBMGA006630	186.103	99.7383	272.467	2.73182	1.44986	1.59561e-09	3.9144e-08	scaf10	2971867	2973790	-	1314	-	-	-	-	-	-	-	-
BGIBMGA005966	424.085	266.204	581.967	2.18617	1.1284	2.15268e-09	5.21168e-08	scaf5	6413288	6414769	-	1482	-	GO:0004345;GO:0004345;GO:0004345;GO:0005975;GO:0006006;GO:0006006;GO:0006006;GO:0006098;GO:0006098;GO:0016491;GO:0050661;GO:0050661;GO:0055114;GO:0055114;GO:0055114;	K00036	-	-	-	Glucose-6-phosphate 1-dehydrogenase[Source:UniProtKB/TrEMBL;Acc:H9J8X4]	101746394
BGIBMGA001137	521.001	245.603	796.398	3.24262	1.69716	2.95567e-09	6.97258e-08	scaf1	5506756	5509494	+	762	TYMS	GO:0004799;GO:0004799;GO:0006231;GO:0006231;GO:0032259;	-	-	-	-	Thymidylate synthase[Source:UniProtKB/TrEMBL;Acc:H9IV57]	-
BGIBMGA011308	948.61	604.112	1293.11	2.14051	1.09795	2.98033e-09	7.01792e-08	scaf12	568603	576257	+	1059	-	GO:0003995;GO:0003995;GO:0016491;GO:0016627;GO:0016627;GO:0050660;GO:0050660;GO:0050660;GO:0055114;GO:0055114;GO:0055114;	-	-	-	-	-	-
BGIBMGA008440	48.7033	11.8129	85.5936	7.24576	2.85714	3.1501e-09	7.36393e-08	scaf2	1679752	1690553	+	3327	-	GO:0005506;GO:0005506;GO:0009055;GO:0009055;GO:0016491;GO:0016491;GO:0016614;GO:0022900;GO:0046872;GO:0046872;GO:0046872;GO:0050660;GO:0050660;GO:0051536;GO:0051536;GO:0051536;GO:0051537;GO:0051537;GO:0051537;GO:0055114;GO:0055114;GO:0071949;GO:0071949;	-	-	-	-	-	-
BGIBMGA011461	565.049	362.296	767.803	2.11927	1.08357	3.79394e-09	8.75797e-08	scaf22	2419145	2420212	-	1068	-	GO:0003677;GO:0003677;GO:0006260;GO:0006260;	K10756	-	-	-	-	101735712
BGIBMGA007334	458.22	304.477	611.962	2.00988	1.00711	4.03868e-09	9.25668e-08	scaf55	2366275	2366841	-	234	-	GO:0005515;	K12158	-	-	-	-	101744114
BGIBMGA011736	349.102	222.424	475.78	2.13907	1.09698	4.06725e-09	9.30564e-08	scaf16	345944	348921	-	1143	-	GO:0003677;GO:0003677;GO:0003887;GO:0003887;GO:0006260;GO:0006260;GO:0071897;	-	-	-	-	-	-
BGIBMGA007838	76.4503	4.59771	148.303	32.2558	5.01149	4.30817e-09	9.80469e-08	scaf3	3068619	3075477	+	621	-	GO:0003841;GO:0003841;GO:0003841;GO:0006629;GO:0008654;GO:0008654;GO:0008654;GO:0016020;GO:0016020;GO:0016020;GO:0016021;GO:0016021;GO:0016740;GO:0016746;GO:0016746;GO:0016746;	-	-	-	-	-	-
BGIBMGA001550	337.511	213.609	461.412	2.16008	1.11108	4.90617e-09	1.10874e-07	scaf7	4905624	4911209	+	1017	CDK7	GO:0004672;GO:0004672;GO:0005524;GO:0005524;GO:0005675;GO:0005675;GO:0006468;GO:0006468;GO:0008353;GO:0008353;GO:0016301;GO:0016310;GO:0070985;GO:0070985;	K02202	-	-	-	Cyclin dependent kinase 7[Source:UniProtKB/TrEMBL;Acc:D2IGZ5]	100379321
BGIBMGA002151	350.649	223.55	477.749	2.1371	1.09565	5.03074e-09	1.13293e-07	scaf23	5022229	5022672	+	444	-	GO:0000413;GO:0000413;GO:0003755;GO:0003755;GO:0003755;GO:0006457;GO:0006457;GO:0016853;	K12733	EC:5.2.1.8	-	-	Peptidyl-prolyl cis-trans isomerase[Source:UniProtKB/TrEMBL;Acc:H9IY18]	733108
BGIBMGA009855	292.45	181.492	403.407	2.22273	1.15233	6.63096e-09	1.46017e-07	scaf51	938885	939940	-	426	-	-	-	-	-	-	-	-
BGIBMGA008902	47.5217	11.8129	83.2304	7.04571	2.81675	7.93246e-09	1.72034e-07	scaf17	2401403	2407864	-	828	-	-	-	-	-	-	-	-
BGIBMGA007777	226.152	78.3636	373.94	4.77186	2.25455	1.3636e-08	2.81985e-07	scaf3	472925	478767	+	870	-	-	-	-	-	-	-	-
BGIBMGA004950	1146.48	604.79	1688.18	2.79135	1.48096	1.40387e-08	2.89147e-07	scaf65	285749	299325	-	2799	-	GO:0003824;GO:0003824;GO:0004329;GO:0004329;GO:0004488;GO:0004488;GO:0005524;GO:0005524;GO:0055114;GO:0055114;	K00288	-	-	-	-	101743494
BGIBMGA009096	21.846	0.528916	43.1631	81.6068	6.35062	2.14914e-08	4.32644e-07	scaf63	970619	974589	+	528	-	-	-	-	-	-	-	-
BGIBMGA013705	187.47	105.95	268.99	2.53884	1.34417	2.16453e-08	4.35064e-07	scaf104	231065	237540	-	882	-	GO:0008168;GO:0016740;GO:0017174;GO:0017174;GO:0032259;	K00552	EC:2.1.1.20	-	-	-	101738705
BGIBMGA001130	146.566	77.6992	215.432	2.77264	1.47126	2.20113e-08	4.41732e-07	scaf1	4638260	4660819	+	1062	-	GO:0006812;GO:0006812;GO:0008324;GO:0008324;GO:0016020;GO:0016021;GO:0016021;GO:0016021;GO:0055085;GO:0055085;GO:0098655;	-	-	-	-	-	-
BGIBMGA000868	174.995	97.0125	252.978	2.60769	1.38277	2.34963e-08	4.67895e-07	scaf1	13260902	13263113	-	441	-	GO:0004497;GO:0004497;GO:0005506;GO:0005506;GO:0016491;GO:0016705;GO:0016705;GO:0020037;GO:0020037;GO:0046872;GO:0055114;GO:0055114;GO:0055114;	-	-	-	-	-	-
BGIBMGA000029	575.236	357.371	793.1	2.21926	1.15008	2.36452e-08	4.70135e-07	scaf98	110692	111813	-	471	-	GO:0003723;GO:0003723;GO:0005730;GO:0005730;	K11129	-	-	-	Nucleolar protein family A member 2[Source:UniProtKB/TrEMBL;Acc:Q1HPV4]	732976
BGIBMGA013227	215.692	128.233	303.152	2.36407	1.24128	2.97256e-08	5.83834e-07	scaf39	1256977	1269360	+	1866	-	GO:0005634;GO:0005634;GO:0006508;GO:0006508;GO:0008233;GO:0008233;	-	-	-	-	-	-
BGIBMGA008749	316.965	205.037	428.893	2.09179	1.06474	3.01664e-08	5.91073e-07	scaf115	482604	484643	-	525	-	-	-	-	-	-	Adenylate cyclase[Source:UniProtKB/TrEMBL;Acc:Q2F5T9]	692922
BGIBMGA001908	56.3474	18.5263	94.1686	5.08297	2.34567	3.90889e-08	7.49484e-07	scaf28	311730	312696	-	882	-	GO:0016020;GO:0016021;GO:0016021;GO:0016021;GO:0055085;GO:0055085;	-	-	-	-	-	-
BGIBMGA012491	339.878	128.382	551.374	4.29478	2.10258	4.155e-08	7.95492e-07	scaf56	758638	767858	+	1584	-	-	K19176	EC:3.5.1.99	-	-	-	101741517
BGIBMGA005162	193.229	112.405	274.054	2.43809	1.28575	4.19242e-08	8.00282e-07	scaf32	3035333	3037793	+	591	-	GO:0003735;GO:0003735;GO:0005840;GO:0005840;GO:0005840;GO:0006412;GO:0006412;	K02867	-	-	-	-	101736605
BGIBMGA005226	318.211	206.977	429.444	2.07484	1.053	5.04171e-08	9.48457e-07	scaf110	44749	63074	-	1596	-	GO:0000166;GO:0005524;GO:0005524;GO:0005524;GO:0016020;GO:0016020;GO:0016020;GO:0016021;GO:0016021;GO:0016887;GO:0016887;	-	-	-	-	-	-
BGIBMGA012521	21.5711	1.53257	41.6097	27.1503	4.76289	5.41162e-08	1.01059e-06	scaf183	149994	152645	+	939	-	GO:0005576;GO:0005576;	K19919	-	-	-	-	101746572
BGIBMGA012352	120.434	60.6784	180.19	2.96959	1.57026	5.46901e-08	1.01983e-06	scaf26	3591183	3595945	+	432	-	GO:0003677;GO:0003677;GO:0016589;GO:0016589;GO:0071339;GO:0071339;	-	-	-	-	-	101738367
BGIBMGA008901	33.7675	6.60502	60.93	9.2248	3.20552	5.62398e-08	1.0457e-06	scaf17	2421048	2421642	-	330	-	GO:0016020;GO:0016021;GO:0016021;	-	-	-	-	-	-
BGIBMGA013141	295.621	190.063	401.178	2.11076	1.07776	5.70901e-08	1.05999e-06	scaf124	332641	333445	+	489	-	-	K14822	-	-	-	-	101744082
BGIBMGA005897	4735.64	1178.38	8292.9	7.03753	2.81507	6.09267e-08	1.12314e-06	scaf67	1375584	1378281	+	864	-	GO:0003824;GO:0003824;GO:0006596;GO:0006596;GO:0016740;GO:0016740;	K00797	EC:2.5.1.16	-	-	-	101742094
BGIBMGA007045	255.05	107.659	402.441	3.73811	1.90231	6.70921e-08	1.22628e-06	scaf21	612053	624850	-	3531	-	GO:0005515;GO:0007009;GO:0007009;	-	-	-	-	-	-
BGIBMGA005167	888.305	569.446	1207.16	2.11989	1.08399	6.73502e-08	1.22926e-06	scaf32	4025020	4027739	+	792	-	GO:0004497;GO:0004499;GO:0004499;GO:0016491;GO:0050660;GO:0050660;GO:0050661;GO:0050661;GO:0055114;GO:0055114;GO:0055114;	-	-	-	-	-	-
BGIBMGA005699	144.481	78.0656	210.896	2.70153	1.43378	7.47752e-08	1.34951e-06	scaf143	66557	67057	-	501	-	GO:0006281;GO:0006281;GO:0008413;GO:0008413;GO:0016787;GO:0016787;	K17816	-	-	-	-	101739539
BGIBMGA002603	74.8533	30.1767	119.53	3.961	1.98587	7.67005e-08	1.3804e-06	scaf20	2545898	2546431	-	246	-	-	-	-	-	-	-	-
BGIBMGA002138	176.627	102.098	251.157	2.45996	1.29864	7.94804e-08	1.42249e-06	scaf23	3851038	3883630	+	3276	-	GO:0016020;GO:0016021;GO:0016021;	-	-	-	-	-	-
BGIBMGA006120	1893.8	1206.14	2581.46	2.14027	1.09779	8.05395e-08	1.43945e-06	scaf5	2045275	2046327	+	1053	-	GO:0003676;GO:0003676;	-	-	-	-	-	-
BGIBMGA011834	686.147	349.234	1023.06	2.92944	1.55063	8.76702e-08	1.56041e-06	scaf16	3063466	3068706	+	678	-	GO:0008113;GO:0008113;GO:0055114;GO:0055114;	-	-	-	-	-	-
BGIBMGA000638	60.3595	21.5102	99.2089	4.61218	2.20545	9.60924e-08	1.70561e-06	scaf8	2038062	2044417	+	1389	-	GO:0003677;GO:0003677;GO:0003677;GO:0005634;GO:0005634;GO:0005634;GO:0006355;GO:0006355;GO:0043565;GO:0043565;	-	-	-	-	-	-
BGIBMGA007967	151.219	76.7911	225.646	2.93845	1.55505	9.77595e-08	1.73281e-06	scaf3	9114087	9121194	+	1209	-	GO:0004725;GO:0004725;GO:0006470;GO:0006470;GO:0008138;GO:0008138;GO:0016311;GO:0016311;GO:0016787;GO:0016791;GO:0016791;GO:0035335;	-	-	-	-	-	-
BGIBMGA001825	407.85	242.24	573.46	2.36732	1.24325	1.03207e-07	1.82187e-06	scaf35	3883160	3883579	+	420	-	GO:0000398;GO:0000398;GO:0000956;GO:0000956;GO:0006396;GO:0006396;	K12623	-	-	-	-	101745795
BGIBMGA002762	331.331	220.389	442.272	2.00677	1.00488	1.09291e-07	1.91616e-06	scaf146	95094	102255	+	534	-	-	-	-	-	-	-	-
BGIBMGA007231	219.972	123.12	316.824	2.57329	1.36361	1.10648e-07	1.93731e-06	scaf131	160142	162041	-	636	-	-	-	-	-	-	-	101745476
BGIBMGA006056	355.949	224.27	487.627	2.17429	1.12054	1.116e-07	1.95134e-06	scaf5	911589	912287	-	699	-	GO:0001522;GO:0001522;GO:0003723;GO:0003723;GO:0005634;GO:0005730;GO:0006364;GO:0006364;GO:0031429;GO:0031429;GO:0042254;GO:0042254;GO:0042254;	K11128	-	-	-	-	101746301
BGIBMGA001789	173.392	95.2903	251.494	2.63925	1.40013	1.22677e-07	2.12772e-06	scaf35	2325184	2338230	+	2283	-	GO:0008270;GO:0008270;GO:0046872;	-	-	-	-	-	-
BGIBMGA007952	410.241	229.491	590.991	2.57523	1.3647	1.23824e-07	2.14474e-06	scaf3	8389276	8400178	+	816	-	GO:0005375;GO:0005375;GO:0016020;GO:0016021;GO:0016021;GO:0016021;GO:0035434;GO:0035434;	-	-	-	-	-	-
BGIBMGA002939	716.937	258.798	1175.08	4.54052	2.18286	1.36883e-07	2.35511e-06	scaf30	4346099	4349398	+	672	-	-	-	-	-	-	-	-
BGIBMGA004227	562.049	343.39	780.708	2.27353	1.18493	1.59216e-07	2.71403e-06	scaf152	102627	108111	+	1143	-	GO:0000287;GO:0000287;GO:0003677;GO:0003677;GO:0003677;GO:0003824;GO:0003824;GO:0004518;GO:0004518;GO:0004518;GO:0004519;GO:0004527;GO:0005634;GO:0005654;GO:0005654;GO:0005730;GO:0005730;GO:0005739;GO:0005739;GO:0006260;GO:0006281;GO:0006281;GO:0006281;GO:0006284;GO:0006284;GO:0006974;GO:0008409;GO:0008409;GO:0016787;GO:0016788;GO:0016788;GO:0017108;GO:0017108;GO:0043137;GO:0043137;GO:0046872;GO:…	K04799	EC:3.-.-.-	-	-	-	101741812
BGIBMGA000480	143.31	78.7841	207.836	2.63804	1.39947	1.66286e-07	2.82337e-06	scaf8	7900451	7903168	-	1185	-	-	-	-	-	-	-	-
BGIBMGA010017	275.505	178.591	372.42	2.08532	1.06027	1.66656e-07	2.82593e-06	scaf45	1476732	1488364	-	585	-	-	-	-	-	-	-	-
BGIBMGA006075	207.102	126.523	287.68	2.27373	1.18506	1.69824e-07	2.87209e-06	scaf5	427312	431617	-	885	-	GO:0016020;GO:0016021;GO:0016021;GO:0022857;GO:0022857;GO:0055085;GO:0055085;	K15106	-	-	-	-	101743508
BGIBMGA011919	300.193	197.374	403.012	2.04187	1.02989	1.81606e-07	3.05924e-06	scaf59	951504	952046	-	543	-	-	-	-	-	-	-	-
BGIBMGA013110	209.017	127.135	290.899	2.28811	1.19416	1.85225e-07	3.11217e-06	scaf219	63911	70371	-	840	-	-	-	-	-	-	-	101743179
BGIBMGA013781	1323.6	854.664	1792.53	2.09735	1.06857	1.94956e-07	3.24608e-06	scaf47	544622	544966	+	345	-	-	-	-	-	-	-	101746322
BGIBMGA006062	44.0691	12.952	75.1861	5.80498	2.53729	1.97117e-07	3.27784e-06	scaf5	825753	837569	-	1014	-	GO:0005890;GO:0005890;GO:0006813;GO:0006813;GO:0006814;GO:0006814;GO:0016020;GO:0016021;	-	-	-	-	-	-
BGIBMGA000926	1346.77	834.702	1858.84	2.22695	1.15507	2.41906e-07	3.96136e-06	scaf1	10198866	10205197	-	999	-	GO:0003824;GO:0003824;GO:0004801;GO:0004801;GO:0004801;GO:0005737;GO:0005737;GO:0005975;GO:0005975;GO:0006098;GO:0006098;GO:0006098;GO:0016740;	-	-	-	-	Transaldolase[Source:UniProtKB/TrEMBL;Acc:H9IUJ6]	-
BGIBMGA013623	273.263	178.685	367.84	2.0586	1.04166	2.49728e-07	4.06367e-06	scaf78	548545	551042	+	321	-	GO:0006368;GO:0006368;GO:0030891;GO:0030891;GO:0070449;GO:0070449;	-	-	-	-	-	-
BGIBMGA012609	403.721	202.677	604.765	2.98388	1.57719	2.81808e-07	4.51733e-06	scaf100	712063	713367	+	1305	-	GO:0000166;GO:0005524;GO:0005524;GO:0005524;	K22399	-	-	-	AAA family ATPase[Source:UniProtKB/TrEMBL;Acc:Q1HQ67]	732909
BGIBMGA006892	93.4235	44.8238	142.023	3.16848	1.66379	2.92438e-07	4.67611e-06	scaf44	3181417	3197080	-	963	-	GO:0016020;GO:0016020;GO:0016757;GO:0016757;	-	-	-	-	-	-
BGIBMGA002030	97.9197	48.2011	147.638	3.06296	1.61493	3.47387e-07	5.4904e-06	scaf23	1743586	1752184	-	375	-	GO:0005096;GO:0005096;GO:0043547;GO:0046872;GO:0046872;	-	-	-	-	-	-
BGIBMGA011373	118.608	62.5503	174.665	2.79239	1.4815	3.69937e-07	5.80033e-06	scaf12	3757035	3785305	+	2979	-	GO:0004672;GO:0004672;GO:0005524;GO:0005524;GO:0006468;GO:0006468;	-	-	-	-	-	-
BGIBMGA007739	1206.28	726.822	1685.74	2.31933	1.21371	3.78126e-07	5.91435e-06	scaf3	902263	902736	-	474	-	-	K15730	EC:5.3.99.3	-	-	-	101746199
BGIBMGA000714	1377.48	605.916	2149.04	3.54677	1.82651	4.10448e-07	6.38892e-06	scaf8	5995152	6001614	+	1395	-	GO:0016020;GO:0016021;GO:0016021;	K14209	-	-	-	-	101746014
BGIBMGA012333	289.531	146.284	432.777	2.95847	1.56485	4.13278e-07	6.4175e-06	scaf26	2209629	2218250	+	918	-	-	-	-	-	-	-	-
BGIBMGA011371	276.656	181.873	371.439	2.0423	1.0302	4.57395e-07	7.02646e-06	scaf12	3609204	3611272	+	384	-	-	-	-	-	-	-	-
BGIBMGA013463	434.215	256.658	611.772	2.38361	1.25315	4.95617e-07	7.55962e-06	scaf111	147261	151658	+	654	-	-	K06685	-	-	-	-	101739784
BGIBMGA012984	188.192	114.169	262.216	2.29674	1.19959	4.98199e-07	7.59003e-06	scaf4	3539422	3542650	+	417	-	GO:0016787;GO:0016787;	-	-	-	-	-	-
BGIBMGA008541	279.079	186.009	372.15	2.00071	1.00052	5.60382e-07	8.48729e-06	scaf2	8920182	8928165	+	675	-	-	-	-	-	-	-	-
BGIBMGA009708	275.121	181.819	368.424	2.02633	1.01887	5.80691e-07	8.75379e-06	scaf27	342574	347029	-	1155	-	GO:0000808;GO:0000808;GO:0003677;GO:0003677;GO:0003677;GO:0005634;GO:0005634;GO:0005634;GO:0006260;GO:0006260;GO:0006260;	-	-	-	-	-	-
BGIBMGA004889	236.674	147.736	325.612	2.20402	1.14014	6.12459e-07	9.17906e-06	scaf144	70340	75335	-	1026	-	GO:0006812;GO:0006812;GO:0008324;GO:0008324;GO:0016020;GO:0016021;GO:0016021;GO:0016021;GO:0055085;GO:0055085;GO:0098655;	K14692	-	-	-	-	101741721
BGIBMGA002518	202.368	121.927	282.809	2.31949	1.21381	7.13053e-07	1.04798e-05	scaf14	3838683	3858467	+	1944	-	GO:0004222;GO:0004222;GO:0004222;GO:0006508;GO:0006508;GO:0006508;GO:0008233;GO:0008237;GO:0008237;GO:0008237;GO:0008270;GO:0008270;GO:0016787;GO:0046872;	-	-	-	-	-	-
BGIBMGA005067	205.433	127.269	283.596	2.22832	1.15596	7.42617e-07	1.08402e-05	scaf32	2139931	2141619	-	789	-	-	-	-	-	-	-	-
BGIBMGA004268	107.88	44.6613	171.099	3.83104	1.93774	7.88562e-07	1.1459e-05	scaf79	1470860	1486154	-	2646	-	GO:0003676;GO:0003676;	K11268	EC:2.3.1.-	-	-	-	101742011
BGIBMGA009043	80.5302	37.188	123.872	3.33098	1.73595	9.03718e-07	1.29143e-05	scaf63	1897384	1906396	-	1032	-	GO:0016491;GO:0016616;GO:0016616;GO:0051287;GO:0051287;GO:0055114;GO:0055114;GO:0055114;	-	-	-	-	-	-
BGIBMGA008215	107.506	23.6258	191.387	8.10075	3.01806	9.15292e-07	1.30652e-05	scaf121	586826	587935	-	1110	-	GO:0016491;GO:0016491;GO:0055114;GO:0055114;	-	-	-	-	-	101744754
BGIBMGA007572	174.802	63.1605	286.444	4.53518	2.18116	9.91682e-07	1.40314e-05	scaf66	858855	869555	+	1362	-	GO:0016020;GO:0016021;GO:0016021;GO:0016021;GO:0055085;GO:0055085;	-	-	-	-	-	-
BGIBMGA006638	153.159	90.3932	215.926	2.38874	1.25625	1.07924e-06	1.5121e-05	scaf10	2759256	2759723	-	186	-	GO:0000166;GO:0000166;GO:0003824;GO:0003824;GO:0005666;GO:0005666;GO:0006352;GO:0006352;GO:0006384;GO:0006384;GO:0030880;GO:0030880;GO:0044237;GO:0044237;	-	-	-	-	-	-
BGIBMGA007767	207.741	125.833	289.648	2.30184	1.20279	1.10412e-06	1.54362e-05	scaf3	48143	50722	+	1242	-	GO:0006629;GO:0006629;GO:0008081;GO:0008081;GO:0016020;GO:0016021;GO:0016021;	-	-	-	-	-	-
BGIBMGA014067	203.473	104.648	302.298	2.88871	1.53042	1.1334e-06	1.57629e-05	scaf251	2977	18451	-	1548	-	-	-	-	-	-	-	-
BGIBMGA009377	69.0324	30.5288	107.536	3.52244	1.81658	1.1336e-06	1.57629e-05	scaf53	1971619	1972716	+	1098	-	-	-	-	-	-	-	-
BGIBMGA003954	144.809	83.9649	205.652	2.44926	1.29235	1.18214e-06	1.63674e-05	scaf105	198729	200341	+	381	-	GO:0000045;GO:0000045;GO:0005737;GO:0005737;GO:0005737;GO:0006914;	K08336	-	-	-	Autophagy related protein Atg12-like protein[Source:UniProtKB/TrEMBL;Acc:B7TYK6]	100216353
BGIBMGA014618	98.1691	45.4482	150.89	3.32004	1.7312	1.19462e-06	1.65047e-05	scaf624	6671	8814	-	1161	-	GO:0000166;GO:0005524;GO:0005524;	-	-	-	-	-	-
BGIBMGA000977	196.93	124.341	269.52	2.16759	1.11609	1.2146e-06	1.67346e-05	scaf1	7380459	7380824	-	366	-	GO:0003677;GO:0003697;GO:0003697;GO:0006260;GO:0006260;	-	-	-	-	Single-stranded DNA-binding protein[Source:UniProtKB/TrEMBL;Acc:H9IUP7]	-
BGIBMGA003562	229.699	149.091	310.307	2.08132	1.0575	1.21515e-06	1.67346e-05	scaf9	1899338	1899945	-	357	-	GO:0005743;GO:0005747;GO:0005747;GO:0016651;GO:0022904;GO:0022904;	-	-	-	-	-	-
BGIBMGA000291	550.026	304.476	795.577	2.61294	1.38567	1.2489e-06	1.71262e-05	scaf18	2818188	2839441	-	852	-	GO:0006629;GO:0006631;GO:0006633;GO:0006633;GO:0016020;GO:0016021;GO:0016021;GO:0016021;GO:0016740;GO:0102336;GO:0102336;GO:0102337;GO:0102337;GO:0102338;GO:0102338;GO:0102756;GO:0102756;	-	-	-	-	-	-
BGIBMGA001621	358.685	123.743	593.626	4.79724	2.2622	1.26496e-06	1.73281e-05	scaf35	3545812	3565702	-	1992	-	GO:0003676;GO:0003676;	-	-	-	-	-	-
BGIBMGA003541	86.4685	42.6269	130.31	3.057	1.61211	1.4163e-06	1.91665e-05	scaf9	2551534	2553778	-	1503	-	-	-	-	-	-	-	-
BGIBMGA006280	28.7256	6.26572	51.1854	8.16911	3.03018	1.42694e-06	1.92608e-05	scaf49	1258263	1259038	-	192	CECA	GO:0002376;GO:0005576;GO:0005576;GO:0005576;GO:0019731;GO:0019731;GO:0042742;GO:0045087;GO:0045087;	-	-	-	-	Cecropin-A [Source:UniProtKB/Swiss-Prot;Acc:Q27239]	-
BGIBMGA012441	516.151	289.924	742.377	2.56059	1.35648	1.47187e-06	1.97843e-05	scaf86	249541	256444	+	882	-	-	-	-	-	-	-	101742052
BGIBMGA008135	81.6873	35.1137	128.261	3.65273	1.86898	1.50253e-06	2.01336e-05	scaf52	1702204	1707037	-	1674	-	GO:0005515;	-	-	-	-	-	-
BGIBMGA012995	166.661	72.8035	260.519	3.57839	1.83931	1.61583e-06	2.14513e-05	scaf4	4231647	4238932	+	1122	-	GO:0004067;GO:0004067;	-	-	-	-	-	-
BGIBMGA002376	233.553	154.11	312.997	2.031	1.02219	1.99133e-06	2.60874e-05	scaf14	5674545	5677093	-	1047	-	GO:0003860;GO:0003860;GO:0003860;GO:0005739;GO:0005739;GO:0006574;GO:0006574;GO:0009083;GO:0016787;	-	-	-	-	-	-
BGIBMGA011755	1394.92	836.684	1953.16	2.33441	1.22306	2.10851e-06	2.74378e-05	scaf16	495913	498991	+	1587	-	GO:0004672;GO:0004672;GO:0004674;GO:0004674;GO:0005524;GO:0005524;GO:0006468;GO:0006468;	-	-	-	-	-	-
BGIBMGA014578	88.9849	14.1053	163.865	11.6172	3.53819	2.1144e-06	2.74766e-05	scaf576	18710	19552	-	843	-	GO:0000786;GO:0000786;GO:0003677;GO:0003677;GO:0003677;GO:0005634;GO:0005634;GO:0005634;GO:0005694;GO:0006334;GO:0006334;	K11275	-	-	-	-	101740214
BGIBMGA005895	337.865	214.001	461.728	2.1576	1.10942	2.18834e-06	2.83234e-05	scaf67	1304895	1307100	+	513	-	-	-	-	-	-	-	-
BGIBMGA001796	212.654	98.2328	327.075	3.32959	1.73535	2.31259e-06	2.9782e-05	scaf35	2654528	2656208	+	819	-	-	-	-	-	-	-	101740622
BGIBMGA009155	108.789	59.5664	158.013	2.65271	1.40747	2.46943e-06	3.155e-05	scaf96	1000760	1001269	+	510	-	-	K03871	-	-	-	-	101739221
BGIBMGA001601	120.414	68.1103	172.719	2.53586	1.34248	2.50284e-06	3.19137e-05	scaf7	8241880	8244851	+	948	-	GO:0016020;GO:0016021;GO:0016021;GO:0016021;GO:0022857;GO:0022857;GO:0055085;GO:0055085;	-	-	-	-	-	-
BGIBMGA011246	599.808	365.929	833.687	2.27827	1.18794	3.01558e-06	3.789e-05	scaf12	3033742	3035895	-	228	-	GO:0006221;GO:0006221;GO:0007049;GO:0045747;GO:0045747;	-	-	-	-	-	-
BGIBMGA008227	67.8054	30.7869	104.824	3.40483	1.76758	3.15309e-06	3.94641e-05	scaf121	10588	13484	+	429	-	GO:0007155;GO:0007155;GO:0016020;GO:0016021;GO:0016021;GO:0016021;GO:0042246;GO:0042246;	-	-	-	-	-	-
BGIBMGA007012	223.685	146.909	300.462	2.04523	1.03226	3.15886e-06	3.9498e-05	scaf21	2509332	2531167	-	1356	-	-	-	-	-	-	-	-
BGIBMGA001148	72.3991	34.2583	110.54	3.22666	1.69004	3.25319e-06	4.05204e-05	scaf1	6191216	6191935	+	720	ASH2	GO:0003677;GO:0003677;GO:0006357;GO:0006357;GO:0046983;GO:0046983;	K09067	-	-	-	Achaete-scute-like protein ASH2[Source:UniProtKB/TrEMBL;Acc:A6N867]	100125603
BGIBMGA011066	1193.78	493.364	1894.19	3.83933	1.94085	3.65544e-06	4.50955e-05	scaf31	684207	684410	+	204	-	-	-	-	-	-	-	101747015
BGIBMGA012803	576.143	246.877	905.41	3.66746	1.87478	3.68546e-06	4.54223e-05	scaf4	6948732	6950632	-	1695	-	-	-	-	-	-	-	-
BGIBMGA014193	383.455	224.202	542.709	2.42063	1.27538	4.36385e-06	5.31739e-05	scaf99	1188671	1190266	+	1596	-	GO:0006479;GO:0006479;GO:0008168;GO:0008168;GO:0008168;GO:0016740;GO:0032259;	K05931	EC:2.1.1.319	-	-	-	101737538
BGIBMGA005249	98.1498	53.151	143.149	2.69325	1.42935	4.43521e-06	5.39924e-05	scaf58	1199215	1201698	-	735	-	GO:0005525;GO:0005525;	-	-	-	-	-	-
BGIBMGA001938	125.083	73.3182	176.848	2.41206	1.27027	5.3244e-06	6.33236e-05	scaf28	2046256	2050259	+	804	-	GO:0006479;GO:0006479;GO:0008168;GO:0008168;GO:0008168;GO:0016740;GO:0032259;	-	-	-	-	-	-
BGIBMGA013631	347.832	227.85	467.815	2.05317	1.03785	5.91198e-06	6.92899e-05	scaf78	875763	890597	+	1122	-	GO:0003824;GO:0003824;GO:0050662;GO:0050662;	-	-	-	-	-	692916
BGIBMGA008532	1658.59	1062.57	2254.61	2.12185	1.08532	6.70796e-06	7.81223e-05	scaf2	8307607	8308493	+	564	-	-	-	-	-	-	-	-
BGIBMGA004033	18.8821	2.5904	35.1739	13.5785	3.76326	6.76714e-06	7.87404e-05	scaf36	853436	853871	-	363	-	-	-	-	-	-	-	-
BGIBMGA008540	190.081	123.052	257.109	2.08944	1.06312	6.92908e-06	8.04796e-05	scaf2	8867745	8868134	+	390	-	-	-	-	-	-	-	-
BGIBMGA000963	91.2587	48.8655	133.652	2.7351	1.45159	7.02625e-06	8.14616e-05	scaf1	8175091	8185940	-	2040	-	GO:0016020;GO:0016021;GO:0016021;	-	-	-	-	-	-
BGIBMGA000419	296.737	120.909	472.565	3.90843	1.96659	7.17232e-06	8.29316e-05	scaf18	2737892	2745506	+	972	-	GO:0003857;GO:0003857;GO:0006631;GO:0006631;GO:0016491;GO:0016491;GO:0055114;GO:0055114;GO:0070403;GO:0070403;	K13247	EC:1.1.1.45	-	-	-	101740023
BGIBMGA013236	18.9505	2.53623	35.3648	13.9439	3.80156	7.40928e-06	8.54418e-05	scaf39	1600636	1603780	+	1383	-	GO:0004497;GO:0004497;GO:0005506;GO:0005506;GO:0016020;GO:0016021;GO:0016021;GO:0016491;GO:0016705;GO:0016705;GO:0020037;GO:0020037;GO:0046872;GO:0055114;GO:0055114;GO:0055114;	-	-	-	-	-	-
BGIBMGA014607	183.883	118.658	249.107	2.09937	1.06996	8.49394e-06	9.6484e-05	scaf583	4565	5031	+	270	-	GO:0005739;GO:0005739;GO:0005758;GO:0005758;GO:0015031;GO:0015031;GO:0046872;GO:0046872;GO:0072321;GO:0072321;	K17780	-	-	-	Translocase of inner mitochondrial membrane 8homolog b [Source:UniProtKB/TrEMBL;Acc:Q2F5V6]	692908
BGIBMGA009012	538.669	293.395	783.943	2.67197	1.4179	8.64032e-06	9.77166e-05	scaf17	4058313	4059663	+	327	-	GO:0005739;GO:0005739;GO:0009055;GO:0009055;GO:0020037;GO:0020037;GO:0022900;GO:0046872;GO:0046872;GO:0055114;GO:0070469;GO:0070469;	-	-	-	-	-	-
BGIBMGA008620	230.49	122.292	338.687	2.7695	1.46962	8.76555e-06	9.90461e-05	scaf136	105740	106123	-	384	-	GO:0005744;GO:0005744;GO:0030150;GO:0030150;	K17805	-	-	-	Mitochondria-associated granulocyte macrophage CSFsignaling molecule [Source:UniProtKB/TrEMBL;Acc:Q2F5Q0]	692951
BGIBMGA004612	3573.9	1703.07	5444.74	3.197	1.67672	9.03227e-06	0.000101615	scaf128	617708	619858	-	2151	HSP90	GO:0000166;GO:0005515;GO:0005524;GO:0005524;GO:0005524;GO:0005737;GO:0005737;GO:0006457;GO:0006457;GO:0006950;GO:0051082;GO:0051082;	K04079	-	-	-	90-kDa heat shock protein[Source:UniProtKB/TrEMBL;Acc:Q9BLC5]	692420
BGIBMGA011575	31.8163	9.19543	54.4373	5.92004	2.56561	9.32715e-06	0.000104477	scaf22	3636219	3637520	+	504	-	-	-	-	-	-	-	-
BGIBMGA004560	94.1576	33.2276	155.088	4.66743	2.22263	9.85856e-06	0.000110238	scaf48	1080054	1085918	-	1437	-	GO:0005215;GO:0005215;GO:0016020;GO:0016020;GO:0016020;GO:0016021;GO:0016021;GO:0016021;GO:0022857;GO:0022857;GO:0055085;GO:0055085;	-	-	-	-	-	-
BGIBMGA011287	154.26	94.3266	214.194	2.27077	1.18318	9.96666e-06	0.000111334	scaf12	1269162	1271582	-	489	-	-	-	-	-	-	-	-
BGIBMGA014005	70.2549	33.9874	106.522	3.13417	1.64808	1.01351e-05	0.000112842	scaf29	3823309	3835709	+	1056	-	GO:0005230;GO:0005230;GO:0006811;GO:0006811;GO:0016021;GO:0016021;GO:0034220;	-	-	-	-	-	-
BGIBMGA008235	160.131	101.556	218.706	2.15355	1.10672	1.07101e-05	0.000118223	scaf121	558529	561388	+	468	-	GO:0005344;GO:0005344;GO:0015671;GO:0019825;GO:0019825;GO:0020037;GO:0020037;GO:0046872;GO:0046872;	-	-	-	-	-	-
BGIBMGA003111	169.496	109.001	229.991	2.10999	1.07724	1.08534e-05	0.000119601	scaf13	2599343	2607681	+	1209	-	GO:0004180;GO:0004185;GO:0004185;GO:0004185;GO:0006508;GO:0006508;GO:0006508;GO:0008233;GO:0016020;GO:0016021;GO:0016021;GO:0016787;	K09645	EC:3.4.16.-	-	-	-	101738672
BGIBMGA012199	121.776	49.3673	194.185	3.93348	1.97581	1.18684e-05	0.000129678	scaf75	1361831	1394203	+	3402	-	-	-	-	-	-	-	-
BGIBMGA002894	926.87	595.636	1258.1	2.1122	1.07875	1.21767e-05	0.000132597	scaf30	1778260	1788975	+	1908	-	GO:0003924;GO:0003924;GO:0005525;GO:0005525;	-	-	-	-	-	-
BGIBMGA003730	194.347	128.626	260.068	2.02189	1.0157	1.22673e-05	0.000133359	scaf9	6580515	6582746	+	723	-	GO:0003723;GO:0003723;GO:0005634;GO:0005634;GO:0005737;GO:0005737;GO:0006397;GO:0006397;	K12839	-	-	-	-	101736899
BGIBMGA006498	99.1783	55.2538	143.103	2.58992	1.37291	1.38409e-05	0.000148465	scaf11	4188824	4189197	+	300	-	-	-	-	-	-	-	-
BGIBMGA004613	127.268	50.4793	204.057	4.04238	2.01521	1.44878e-05	0.000154761	scaf128	607395	609831	-	762	-	GO:0000166;GO:0005524;GO:0005524;	-	-	-	-	-	-
BGIBMGA006536	1004.74	600.166	1409.31	2.3482	1.23155	1.62894e-05	0.000172011	scaf11	6799690	6799911	+	222	-	-	-	-	-	-	-	-
BGIBMGA013768	171.121	111.104	231.138	2.08039	1.05685	1.6534e-05	0.000174168	scaf47	101209	103046	-	843	-	GO:0016020;GO:0016021;GO:0016021;	-	-	-	-	-	-
BGIBMGA007919	191.688	118.535	264.84	2.23427	1.1598	1.75501e-05	0.000183412	scaf3	6469203	6473984	+	759	-	GO:0016491;GO:0016491;GO:0055114;	-	-	-	-	-	-
BGIBMGA004515	94.9965	43.6034	146.39	3.35729	1.7473	1.75927e-05	0.00018367	scaf97	1076410	1077045	-	636	-	GO:0046872;	-	-	-	-	-	-
BGIBMGA001795	101.98	43.1558	160.804	3.72612	1.89767	1.9401e-05	0.000201085	scaf35	2563377	2569464	+	1152	-	GO:0016020;GO:0016021;GO:0016021;	-	-	-	-	-	105842074
BGIBMGA010523	520.863	318.433	723.294	2.27142	1.18359	1.95804e-05	0.000202619	scaf6	2170520	2177388	+	1644	-	GO:0000139;GO:0000139;GO:0005794;GO:0006486;GO:0006486;GO:0016020;GO:0016021;GO:0016021;GO:0016740;GO:0016757;GO:0016757;GO:0030246;GO:0030246;	-	-	-	-	-	-
BGIBMGA013507	61.0462	28.7795	93.3129	3.24233	1.69703	2.00725e-05	0.000206551	scaf101	89629	107742	+	1461	BMCYCE	GO:0005634;GO:0005634;	-	-	-	-	Cyclin E [Source:UniProtKB/TrEMBL;Acc:B6ZL90]"	-
BGIBMGA014337	161.781	104.824	218.739	2.08673	1.06125	2.18416e-05	0.000221924	BABH01045936	1482	3323	-	756	-	GO:0000049;GO:0000049;GO:0004812;GO:0004812;GO:0005524;GO:0005524;GO:0005737;GO:0005737;GO:0043039;GO:0043039;	-	-	-	-	-	-
BGIBMGA014580	80.0486	27.9527	132.144	4.72744	2.24106	2.24772e-05	0.000227486	scaf576	13570	13881	-	312	H4-L	GO:0000786;GO:0000786;GO:0000786;GO:0003677;GO:0003677;GO:0003677;GO:0005634;GO:0005634;GO:0005634;GO:0005694;GO:0006334;GO:0006334;GO:0006352;GO:0006352;GO:0046982;GO:0046982;	K11254	-	-	-	Histone H4 [Source:UniProtKB/TrEMBL;Acc:B9X1S5]"	100301501
BGIBMGA004775	165.273	85.2395	245.306	2.87785	1.52499	2.29313e-05	0.000231463	scaf57	1599790	1601872	+	636	-	GO:0016787;GO:0016787;GO:0016818;GO:0016818;GO:0046872;GO:0046872;	K08077	EC:3.6.1.45	-	-	-	101741144
BGIBMGA013975	18.2363	3.06514	33.4075	10.8992	3.44615	2.90791e-05	0.000284918	scaf29	1836398	1837621	+	1224	-	GO:0003723;GO:0003723;GO:0003723;GO:0005634;GO:0005634;GO:0006396;GO:0006396;GO:1990904;GO:1990904;	K18733	-	-	-	-	101745593
BGIBMGA004513	158.241	103.414	213.069	2.06035	1.04289	3.12436e-05	0.000304277	scaf97	1130517	1135488	-	1524	-	GO:0005515;	-	-	-	-	-	-
BGIBMGA005207	334.827	212.685	456.969	2.14857	1.10338	3.14646e-05	0.000305738	scaf119	336850	348427	+	1506	-	GO:0003824;GO:0003824;GO:0008152;	-	-	-	-	-	-
BGIBMGA002541	24.2112	3.06514	45.3574	14.7978	3.88731	3.30561e-05	0.000318801	scaf14	5496340	5504708	+	1146	-	GO:0004620;GO:0004620;GO:0016788;GO:0016788;	-	-	-	-	-	-
BGIBMGA001157	113.731	64.2725	163.189	2.53902	1.34427	3.44719e-05	0.000330971	scaf1	6588713	6595793	+	681	-	GO:0046872;GO:0046872;	-	-	-	-	-	-
BGIBMGA007072	2304.27	956.376	3652.16	3.81875	1.9331	3.75788e-05	0.000357872	scaf21	1678853	1680196	+	1344	-	-	-	-	-	-	-	-
BGIBMGA013646	17.8504	2.0344	33.6664	16.5486	4.04863	3.97027e-05	0.000375604	scaf78	1722325	1725658	+	582	-	GO:0016020;GO:0016021;GO:0016021;GO:0016491;GO:0016491;GO:0055114;	-	-	-	-	-	-
BGIBMGA001333	24.265	6.21155	42.3185	6.81287	2.76826	4.40068e-05	0.000412093	scaf288	481	3756	-	1014	-	GO:0004846;GO:0004846;GO:0004846;GO:0005777;GO:0005777;GO:0006144;GO:0006144;GO:0006144;GO:0016491;GO:0019628;GO:0019628;GO:0055114;GO:0055114;GO:0055114;	K00365	EC:1.7.3.3	-	-	Uricase [Source:UniProtKB/TrEMBL;Acc:Q3HWK9]"	692784
BGIBMGA004605	635.638	208.334	1062.94	5.1021	2.35109	5.07853e-05	0.000471124	scaf48	2707115	2707675	+	87	-	-	-	-	-	-	-	-
BGIBMGA006485	48.1774	21.6185	74.7363	3.45705	1.78954	5.42617e-05	0.000499069	scaf11	2459966	2462279	+	555	-	GO:0003677;GO:0003677;GO:0003700;GO:0003700;GO:0006355;GO:0006355;	-	-	-	-	-	-
BGIBMGA011452	82.5506	46.3022	118.799	2.56573	1.35937	5.64307e-05	0.000517542	scaf22	3142641	3143551	-	399	-	GO:0008083;GO:0008083;GO:0010469;	-	-	-	-	-	-
BGIBMGA011784	566.022	321.119	810.926	2.52532	1.33646	6.05577e-05	0.000552252	scaf16	1300452	1304777	+	3915	-	GO:0003676;GO:0003676;GO:0005524;GO:0005524;GO:0006310;GO:0006310;GO:0008026;GO:0008026;GO:0008270;GO:0008270;	-	-	-	-	-	-
BGIBMGA009376	291.416	187.501	395.33	2.10841	1.07616	6.21458e-05	0.000565137	scaf53	1921994	1924630	+	1278	-	GO:0005215;GO:0005215;GO:0016020;GO:0016021;GO:0016021;GO:0016021;GO:0022857;GO:0022857;GO:0055085;GO:0055085;	-	-	-	-	-	-
BGIBMGA000752	156.147	103.332	208.961	2.02222	1.01594	6.23077e-05	0.000565812	scaf89	1250547	1252370	-	1134	-	GO:0008299;GO:0008299;GO:0016740;GO:0016740;	-	-	-	-	-	-
BGIBMGA012219	171.358	114.006	228.709	2.00611	1.0044	6.43511e-05	0.000581911	scaf168	51995	58286	+	1005	-	GO:0004594;GO:0004594;GO:0005524;GO:0005524;GO:0015937;GO:0015937;GO:0016310;	-	-	-	-	-	-
BGIBMGA010479	67.7696	35.9135	99.6257	2.77405	1.47199	7.67216e-05	0.000677628	scaf6	416867	417544	-	378	-	-	-	-	-	-	-	-
BGIBMGA003387	103.907	62.9566	144.858	2.30092	1.20221	7.80255e-05	0.000687264	scaf42	456715	467611	+	1152	-	GO:0016020;GO:0016021;GO:0016021;GO:0022857;	-	-	-	-	-	-
BGIBMGA007854	110.701	68.2058	153.196	2.24609	1.16741	7.94568e-05	0.000698917	scaf3	3735638	3737257	+	684	-	GO:0008152;GO:0016787;GO:0016787;	-	-	-	-	-	-
BGIBMGA005177	4637.33	3017.21	6257.46	2.07392	1.05236	8.01738e-05	0.000704264	scaf290	26603	36938	-	1953	-	GO:0003676;GO:0003676;GO:0003723;GO:0003723;	-	-	-	-	-	-
BGIBMGA007505	124.264	73.4679	175.06	2.38281	1.25266	8.14695e-05	0.000713702	scaf66	1363848	1367997	-	372	-	GO:0000166;GO:0003924;GO:0003924;GO:0005525;GO:0005525;GO:0005525;GO:0005622;GO:0005622;GO:0007264;GO:0007264;	-	-	-	-	-	-
BGIBMGA014598	104.198	62.9979	145.398	2.30798	1.20663	8.92163e-05	0.000774208	scaf512	2435	4470	-	492	-	-	-	-	-	-	-	101735771
BGIBMGA000941	116.935	73.3595	160.51	2.18799	1.1296	9.67509e-05	0.000828449	scaf1	9302120	9306751	-	861	-	GO:0005515;	-	-	-	-	-	-
BGIBMGA006486	111.212	69.3849	153.038	2.20564	1.1412	0.000100967	0.000861696	scaf11	2477649	2478269	+	621	-	GO:0003677;GO:0003677;GO:0003677;GO:0005634;GO:0005634;GO:0006355;GO:0006355;GO:0043565;GO:0043565;	-	-	-	-	-	-
BGIBMGA013330	129.975	83.8566	176.093	2.09994	1.07035	0.000110151	0.000932055	scaf142	216639	217646	+	1008	CROC	GO:0003677;GO:0003700;GO:0003700;GO:0005634;GO:0005634;GO:0006355;GO:0006355;GO:0043565;GO:0043565;	K09396	-	-	-	Transcription factor crocodile[Source:UniProtKB/TrEMBL;Acc:G5EI84]	100852390
BGIBMGA013340	184.496	116.203	252.789	2.17541	1.12128	0.00011269	0.000951018	scaf199	8451	12057	+	558	-	GO:0004146;GO:0004146;GO:0006545;GO:0006545;GO:0046654;GO:0046654;GO:0050661;GO:0050661;GO:0055114;GO:0055114;	-	-	-	-	-	-
BGIBMGA006195	419.196	221.801	616.592	2.77993	1.47505	0.000114437	0.000962015	scaf5	7310042	7315094	+	1119	-	GO:0006270;GO:0006270;GO:0051301;GO:0051301;	-	-	-	-	-	-
BGIBMGA014536	43.0485	19.001	67.0959	3.53117	1.82015	0.000115667	0.000971723	scaf377	13743	15629	-	1887	BMO.7782	GO:0000166;GO:0005524;GO:0005524;	K03283	-	-	-	Heat shock protein 68[Source:UniProtKB/TrEMBL;Acc:F8UN43]	100862772
BGIBMGA000305	107.94	67.5001	148.38	2.19822	1.13633	0.000147884	0.00120094	scaf18	1692908	1706179	-	1350	-	GO:0003677;GO:0005634;GO:0005634;GO:0006355;GO:0006355;GO:0043565;GO:0043565;GO:0046872;GO:0046872;	-	-	-	-	-	-
BGIBMGA006973	124.826	80.8727	168.78	2.08698	1.06142	0.00014897	0.00120824	scaf21	5309631	5313247	-	858	-	GO:0000166;GO:0005524;GO:0005524;GO:0005524;GO:0005737;GO:0005737;GO:0016226;GO:0016226;GO:0016226;GO:0046872;GO:0046872;GO:0051536;GO:0051539;GO:0051539;GO:0051539;	-	-	-	-	-	-
BGIBMGA003865	375.484	126.904	624.065	4.91761	2.29796	0.000149419	0.00121112	scaf72	577935	582712	-	486	-	GO:0005739;GO:0005739;GO:0005960;GO:0005960;GO:0005960;GO:0019464;GO:0019464;GO:0019464;	K02437	-	-	-	-	101743217
BGIBMGA003046	110.468	68.9657	151.97	2.20356	1.13983	0.000151429	0.00122665	scaf13	2528082	2538652	-	2091	-	GO:0005216;GO:0005216;GO:0006811;GO:0006811;GO:0006811;GO:0016020;GO:0016020;GO:0016020;GO:0016021;GO:0016021;GO:0034220;GO:0055085;GO:0055085;	-	-	-	-	-	-
BGIBMGA003128	220.187	105.76	334.615	3.1639	1.6617	0.000154806	0.00125086	scaf13	3202263	3203047	+	234	-	-	-	-	-	-	-	-
BGIBMGA013010	657.166	433.115	881.216	2.0346	1.02475	0.0001581	0.0012711	scaf4	4682802	4687135	+	924	-	GO:0016787;GO:0016787;	K15423	EC:3.1.3.16	-	-	-	101742306
BGIBMGA014590	31.4837	10.8363	52.131	4.81076	2.26626	0.000159173	0.00127814	BABH01043539	2250	3138	-	567	-	-	-	-	-	-	-	-
BGIBMGA007060	135.915	90.3119	181.518	2.0099	1.00712	0.000163936	0.00130825	scaf21	479471	481403	+	804	-	-	-	-	-	-	-	-
BGIBMGA005869	176.638	99.1823	254.094	2.56189	1.35721	0.000169953	0.00134699	scaf125	444667	445014	+	348	-	GO:0000811;GO:0000811;GO:0006260;GO:0006260;	-	-	-	-	-	-
BGIBMGA003373	25.6706	8.24595	43.0952	5.22623	2.38577	0.000172493	0.00136304	scaf42	306837	307933	-	864	-	-	-	-	-	-	-	-
BGIBMGA003129	1950.83	979.708	2921.94	2.98246	1.5765	0.000174682	0.00137612	scaf13	3212931	3222216	+	648	-	-	-	-	-	-	-	-
BGIBMGA006814	107.264	67.5543	146.973	2.17563	1.12144	0.000184957	0.00144648	scaf70	1332252	1334604	-	558	-	GO:0005643;GO:0005643;GO:0006913;GO:0006913;GO:0017056;GO:0017056;	-	-	-	-	-	-
BGIBMGA014208	83.2923	49.5299	117.055	2.36332	1.24081	0.000216199	0.00166359	scaf207	94788	96662	+	504	-	GO:0016020;GO:0016021;GO:0016021;GO:0020037;GO:0020037;GO:0020037;GO:0046872;GO:0046872;	-	-	-	-	-	-
BGIBMGA009947	86.7591	45.2444	128.274	2.83513	1.50342	0.000224511	0.00171934	scaf267	27452	28427	-	663	-	-	-	-	-	-	-	-
BGIBMGA004618	14.6571	2.5904	26.7238	10.3165	3.36688	0.000227451	0.00173465	scaf128	329522	342278	-	1086	-	GO:0005576;GO:0005576;GO:0008083;GO:0008083;GO:0008083;GO:0010469;	K04669	-	-	-	-	101735420
BGIBMGA011307	33.2682	13.4268	53.1097	3.95551	1.98387	0.000227922	0.00173721	scaf12	560195	560470	+	183	-	-	-	-	-	-	-	-
BGIBMGA000882	92.7022	56.6367	128.768	2.27357	1.18496	0.000229516	0.00174524	scaf1	12329356	12330213	-	405	-	GO:0003735;GO:0003735;GO:0005622;GO:0005622;GO:0005840;GO:0005840;GO:0006412;GO:0006412;	-	-	-	-	-	-
BGIBMGA010908	36.4051	15.3799	57.4302	3.73411	1.90077	0.000242986	0.00182828	scaf195	44377	45666	-	1290	-	GO:0005634;GO:0005634;GO:0005737;GO:0005739;GO:0005759;GO:0005759;GO:0008033;GO:0008168;GO:0009019;GO:0009019;GO:0009019;GO:0016740;GO:0030488;GO:0030488;GO:0030488;GO:0032259;GO:0052906;GO:0052906;	-	-	-	-	tRNA (guanine(37)-N1)-methyltransferase[Source:UniProtKB/TrEMBL;Acc:H9JN05]	-
BGIBMGA006803	15.9046	3.03805	28.7711	9.47025	3.2434	0.000252114	0.00188596	scaf70	1809328	1810428	-	333	-	-	-	-	-	-	-	-
BGIBMGA000404	306.717	159.074	454.359	2.85628	1.51414	0.000253674	0.00189653	scaf18	2225404	2238603	+	1413	-	-	-	-	-	-	-	-
BGIBMGA004580	128.791	85.1582	172.425	2.02476	1.01775	0.000263365	0.00196103	scaf48	641175	645064	+	675	-	GO:0046872;GO:0046872;	-	-	-	-	-	-
BGIBMGA000178	127.196	84.2629	170.13	2.01903	1.01366	0.000279175	0.00206801	scaf154	1225	9773	+	858	-	GO:0016020;GO:0016021;GO:0016021;GO:0016021;GO:0055085;GO:0055085;	-	-	-	-	-	-
BGIBMGA010980	83.6534	50.14	117.167	2.33679	1.22453	0.000284462	0.00209994	scaf83	193394	194278	-	885	-	GO:0003677;GO:0003677;GO:0003677;GO:0005634;GO:0005634;GO:0006355;GO:0006355;GO:0043565;GO:0043565;	K09310	-	-	-	-	101743730
BGIBMGA006124	131.61	87.6545	175.565	2.00292	1.0021	0.000284699	0.00210049	scaf5	2184436	2186676	+	360	-	-	-	-	-	-	-	-
BGIBMGA008958	147.383	69.2637	225.503	3.25572	1.70298	0.000325316	0.00236633	scaf17	1169339	1179920	+	2703	-	GO:0001944;GO:0001944;GO:0005515;GO:0008191;GO:0008191;GO:0060828;GO:0060828;GO:1904684;GO:1904684;	-	-	-	-	-	-
BGIBMGA003858	88.3131	54.5752	122.051	2.23638	1.16117	0.000337343	0.00243626	scaf72	1141421	1151389	-	1377	-	GO:0000166;GO:0004672;GO:0004672;GO:0004674;GO:0004674;GO:0004674;GO:0005524;GO:0005524;GO:0005524;GO:0006468;GO:0006468;GO:0016301;GO:0016310;GO:0016740;	-	-	-	-	-	-
BGIBMGA005922	229.778	138.175	321.381	2.3259	1.21779	0.000337384	0.00243626	scaf5	8479497	8481573	-	360	-	GO:0005856;GO:0005885;GO:0005885;GO:0015629;GO:0015629;GO:0030833;GO:0030833;GO:0034314;GO:0034314;	-	-	-	-	Actin-related protein 2/3 complex subunit 5[Source:UniProtKB/TrEMBL;Acc:H9J8T0]	-
BGIBMGA003355	245.116	141.362	348.871	2.46793	1.3033	0.000344513	0.00248358	scaf42	669972	676803	-	924	-	GO:0005525;GO:0005525;	K16185	-	-	-	-	101742921
BGIBMGA001296	127.385	83.4902	171.279	2.05149	1.03667	0.00035345	0.00253525	scaf1	15200514	15217202	+	1410	-	GO:0003677;GO:0003700;GO:0003700;GO:0005634;GO:0005634;GO:0005634;GO:0006355;GO:0006355;GO:0043565;GO:0043565;	K09442	-	-	-	-	101746525
BGIBMGA009232	40.4208	18.4721	62.3696	3.37642	1.75549	0.000358952	0.00256758	scaf38	1762143	1767186	-	1092	-	GO:0003824;GO:0003824;GO:0004034;GO:0004034;GO:0005975;GO:0005975;GO:0005975;GO:0016853;GO:0016853;GO:0016853;GO:0019318;GO:0019318;GO:0019318;GO:0030246;GO:0030246;	K01785	EC:5.1.3.3	-	-	Aldose 1-epimerase[Source:UniProtKB/TrEMBL;Acc:H9JI83]	101741280
BGIBMGA011531	41.0879	18.8385	63.3372	3.36212	1.74937	0.000363328	0.00259027	scaf22	1121163	1138665	+	1338	-	GO:0006629;GO:0006629;GO:0006650;GO:0008081;GO:0008081;GO:0047396;	-	-	-	-	-	101743953
BGIBMGA001635	89.1401	55.2396	123.041	2.2274	1.15536	0.000372476	0.00264671	scaf35	3000016	3001920	-	1905	-	GO:0000166;GO:0005524;GO:0005524;	-	-	-	-	-	-
BGIBMGA001410	45.1099	22.0662	68.1535	3.0886	1.62695	0.000377466	0.00267774	scaf7	6078917	6082848	-	3165	-	GO:0003676;GO:0003676;	-	-	-	-	-	-
BGIBMGA009874	114.852	20.9542	208.75	9.96222	3.31647	0.000397487	0.00280743	scaf51	433778	453764	+	1677	-	GO:0016787;GO:0016787;	-	-	-	-	-	-
BGIBMGA004169	55.9684	30.2579	81.6789	2.69942	1.43265	0.00040429	0.00285235	scaf60	603695	606087	-	561	-	GO:0005737;GO:0005737;GO:0120009;GO:0120009;GO:0120013;GO:0120013;	-	-	-	-	-	-
BGIBMGA000639	23.3673	7.68994	39.0446	5.07735	2.34408	0.000413823	0.00290848	scaf8	2214105	2215018	+	810	-	GO:0003677;GO:0003677;GO:0003677;GO:0005634;GO:0005634;GO:0005634;GO:0006355;GO:0006355;GO:0043565;GO:0043565;	-	-	-	-	-	-
BGIBMGA006394	57.665	27.5863	87.7438	3.1807	1.66935	0.000420615	0.002953	scaf11	2628103	2637204	-	819	-	GO:0003677;GO:0003677;GO:0003700;GO:0003700;GO:0006355;GO:0006355;	-	-	-	-	-	-
BGIBMGA000319	83.3365	50.5748	116.098	2.29557	1.19885	0.000425685	0.00298697	scaf18	869323	875174	-	3171	-	GO:0003676;GO:0003676;GO:0005515;	-	-	-	-	-	-
BGIBMGA004029	517.849	292.69	743.009	2.53855	1.34401	0.000444276	0.0031056	scaf36	1185687	1195164	-	807	-	GO:0046872;GO:0046872;GO:0046872;	-	-	-	-	-	-
BGIBMGA005443	7.29699	0	14.594	Inf	Inf	0.000446509	0.00311952	scaf19	1617251	1621883	+	1461	-	GO:0008152;GO:0015020;GO:0015020;GO:0016020;GO:0016021;GO:0016021;GO:0016740;GO:0016757;GO:0016758;GO:0016758;	-	-	-	-	-	-
BGIBMGA002573	30.6442	12.4773	48.8112	3.91201	1.96791	0.00045934	0.00319877	scaf20	4982970	5004755	-	2061	-	GO:0003997;GO:0003997;GO:0005777;GO:0005777;GO:0006631;GO:0006631;GO:0006635;GO:0006635;GO:0016627;GO:0016627;GO:0050660;GO:0050660;GO:0055114;GO:0055114;GO:0071949;GO:0071949;	-	-	-	-	Acyl-coenzyme A oxidase[Source:UniProtKB/TrEMBL;Acc:H9IZ88]	-
BGIBMGA014579	18.7752	5.09954	32.4508	6.36348	2.66982	0.000477177	0.00330746	scaf576	17419	17793	-	375	H2A-L2	GO:0000786;GO:0000786;GO:0000786;GO:0003677;GO:0003677;GO:0003677;GO:0005634;GO:0005634;GO:0005634;GO:0005694;GO:0046982;GO:0046982;	-	-	-	-	Histone H2A [Source:UniProtKB/TrEMBL;Acc:B9A9Z3]"	-
BGIBMGA008398	80.3555	49.3944	111.317	2.25363	1.17225	0.000516332	0.00352933	scaf2	863499	866651	-	525	-	GO:0016020;GO:0016021;GO:0016021;	-	-	-	-	-	-
BGIBMGA013485	94.9418	58.088	131.796	2.26889	1.18199	0.000576803	0.00388613	scaf101	831864	853742	-	1989	-	GO:0005215;GO:0005215;GO:0005515;GO:0005886;GO:0005886;GO:0006811;GO:0006811;GO:0016020;GO:0016020;GO:0016020;GO:0016021;GO:0016021;GO:0055085;GO:0055085;	-	-	-	-	-	-
BGIBMGA014266	12.6607	2.00731	23.314	11.6145	3.53786	0.000587545	0.00395085	scaf80	1007418	1014870	+	1710	-	GO:0016020;GO:0016020;GO:0016020;GO:0016021;GO:0016021;GO:0022857;GO:0022857;GO:0055085;GO:0055085;	-	-	-	-	-	-
BGIBMGA001386	2438.19	1353.08	3523.29	2.6039	1.38067	0.000651074	0.00431508	scaf7	8282876	8284130	-	1098	-	GO:0000287;GO:0000287;GO:0004749;GO:0004749;GO:0009116;GO:0009116;GO:0009156;GO:0009156;GO:0009165;GO:0009165;GO:0044249;GO:0044249;	-	-	-	-	-	-
BGIBMGA004168	28.1338	11.3382	44.9295	3.96268	1.98648	0.000688098	0.00453253	scaf60	656003	657569	-	333	CHHL	GO:0005179;GO:0005184;GO:0005184;GO:0005576;GO:0005576;GO:0005576;GO:0007218;GO:0007218;GO:0010469;	-	-	-	-	CHH-like protein [Source:UniProtKB/Swiss-Prot;Acc:Q9NL55]	100127118
BGIBMGA010918	470.289	311.273	629.305	2.02171	1.01558	0.000713964	0.00468855	scaf68	1318446	1325790	-	762	-	GO:0006629;GO:0006631;GO:0006633;GO:0006633;GO:0016020;GO:0016021;GO:0016021;GO:0016021;GO:0016740;GO:0102336;GO:0102336;GO:0102337;GO:0102337;GO:0102338;GO:0102338;GO:0102756;GO:0102756;	-	-	-	-	-	-
BGIBMGA012103	334.151	208.903	459.4	2.19911	1.13692	0.000844208	0.00541973	scaf24	2457515	2467047	+	1881	-	GO:0003677;GO:0003677;GO:0003824;GO:0003824;GO:0004518;GO:0004518;GO:0005634;GO:0005634;GO:0006281;GO:0006281;GO:0016788;GO:0016788;GO:0035312;GO:0035312;GO:0090305;	-	-	-	-	-	-
BGIBMGA003374	74.0325	45.2444	102.821	2.27256	1.18432	0.000916322	0.00583657	scaf42	151804	163030	-	1767	-	GO:0005509;GO:0005509;	-	-	-	-	-	-
BGIBMGA000896	910.275	581.916	1238.63	2.12854	1.08986	0.000961688	0.00608613	scaf1	11104273	11114597	-	969	-	GO:0006812;GO:0006812;GO:0008324;GO:0008324;GO:0016020;GO:0016021;GO:0016021;GO:0016021;GO:0055085;GO:0055085;GO:0098655;	-	-	-	-	-	-
BGIBMGA003909	199.355	126.05	272.66	2.16311	1.11311	0.000986006	0.00620655	scaf114	448445	450932	-	681	-	GO:0000166;GO:0005524;GO:0005524;GO:0005524;GO:0006139;GO:0006139;GO:0009165;GO:0019206;GO:0019206;	K05961	EC:2.7.1.145	-	-	-	101741300
BGIBMGA010772	376.345	127.094	625.596	4.92233	2.29934	0.00107391	0.00665939	scaf25	301924	303170	-	369	-	-	-	-	-	-	-	-
BGIBMGA003657	34.1783	15.8546	52.5019	3.31146	1.72747	0.0011019	0.00680982	scaf9	2987036	2987236	+	201	-	GO:0003824;GO:0003824;GO:0030170;GO:0030170;	-	-	-	-	-	-
BGIBMGA009745	56.2603	32.3052	80.2154	2.48305	1.31211	0.00112259	0.00692774	scaf27	1156905	1161640	+	420	-	GO:0016020;GO:0016021;GO:0016021;	-	-	-	-	-	-
BGIBMGA013017	246.348	161.841	330.856	2.04433	1.03163	0.00137068	0.00827469	scaf4	4961717	4970742	+	951	-	-	-	-	-	-	-	-
BGIBMGA010337	80.0775	51.0895	109.065	2.13479	1.0941	0.00137938	0.0083098	scaf109	306524	306751	+	228	-	GO:0003677;GO:0003677;GO:0003713;GO:0006355;GO:0006355;	-	-	-	-	-	-
BGIBMGA002238	29.241	12.8437	45.6383	3.55337	1.82919	0.0013821	0.00832225	scaf34	3939186	3940091	-	906	-	GO:0003676;GO:0003676;	K12379	-	-	-	-	101735539
BGIBMGA012269	54.32	31.0577	77.5823	2.498	1.32078	0.00141902	0.00850097	scaf26	1585166	1588778	-	1923	-	GO:0005085;GO:0005085;GO:0005085;GO:0005622;GO:0005622;GO:0007264;GO:0007264;	-	-	-	-	-	-
BGIBMGA008875	81.0847	52.1473	110.022	2.10983	1.07713	0.00142414	0.00852372	scaf17	4066733	4075129	-	1455	-	-	-	-	-	-	-	-
BGIBMGA005472	133.359	70.1447	196.574	2.80241	1.48667	0.00146181	0.00870477	scaf19	3870164	3877893	+	897	PDXK	GO:0008478;GO:0008478;GO:0009443;GO:0009443;GO:0016301;GO:0016310;	K00868	EC:2.7.1.35	-	-	Pyridoxal kinase[Source:UniProtKB/TrEMBL;Acc:Q1PCB1]	693009
BGIBMGA012948	50.8802	28.7795	72.9809	2.53586	1.34247	0.0015046	0.00893244	scaf4	1392963	1404127	+	1485	-	GO:0000166;GO:0000166;GO:0009166;GO:0009166;GO:0016787;GO:0016787;GO:0016787;	-	-	-	-	-	-
BGIBMGA012729	69.7081	43.0203	96.3958	2.2407	1.16395	0.0015658	0.00922188	scaf93	954706	958505	-	1584	-	GO:0016787;GO:0016787;	-	-	-	-	-	-
BGIBMGA006048	26.151	10.7822	41.5197	3.85078	1.94515	0.00160985	0.00945108	scaf5	1015603	1022574	-	1038	-	GO:0016020;GO:0016021;GO:0016021;GO:0016491;GO:0016491;GO:0055114;	-	-	-	-	-	-
BGIBMGA002778	121.795	75.6648	167.926	2.21934	1.15013	0.00161807	0.00949065	scaf30	3866888	3869693	-	789	-	GO:0003677;GO:0003677;GO:0005524;GO:0005524;GO:0006281;GO:0006281;GO:0008094;GO:0008094;	-	-	-	-	-	-
BGIBMGA004140	221.725	82.7845	360.665	4.35667	2.12322	0.00166879	0.00974032	scaf36	3943021	3944694	+	1674	-	GO:0016874;GO:0016874;	K01969	EC:6.4.1.4	-	-	-	101744540
BGIBMGA009688	59.344	35.4117	83.2763	2.35166	1.23368	0.00171525	0.0099836	scaf27	1212348	1228317	-	1809	-	GO:0003677;GO:0003677;GO:0003677;GO:0003700;GO:0003700;GO:0003707;GO:0003707;GO:0004887;GO:0004887;GO:0005634;GO:0005634;GO:0005634;GO:0006351;GO:0006351;GO:0006355;GO:0006355;GO:0006355;GO:0008270;GO:0008270;GO:0030522;GO:0043401;GO:0043565;GO:0043565;GO:0046872;	-	-	-	-	-	-
BGIBMGA002448	67.6719	41.8399	93.5039	2.2348	1.16015	0.00180408	0.0103709	scaf14	356511	363699	-	888	-	GO:0003924;GO:0003924;GO:0005525;GO:0005525;GO:0007165;GO:0007165;GO:0016020;GO:0016020;	-	-	-	-	-	-
BGIBMGA010052	9.04994	1.03074	17.0691	16.56	4.04963	0.00183957	0.0105407	scaf45	286595	289123	+	477	-	GO:0003677;GO:0003677;GO:0003677;GO:0005634;GO:0005634;	-	-	-	-	-	-
BGIBMGA012885	12.1356	2.64458	21.6265	8.17769	3.03169	0.00186068	0.0106475	scaf4	1739846	1745594	-	657	-	-	-	-	-	-	-	-
BGIBMGA000091	24.9496	10.4158	39.4834	3.79073	1.92247	0.00187261	0.0106968	scaf43	1198756	1206654	-	1107	-	GO:0003677;GO:0003677;GO:0003677;GO:0005634;GO:0005634;GO:0006355;GO:0006355;GO:0043565;GO:0043565;	K15615	-	-	-	-	101745557
BGIBMGA013822	10.8493	2.00731	19.6912	9.80975	3.29422	0.00223166	0.0124563	scaf62	1747829	1757409	-	1641	-	GO:0003824;GO:0003824;GO:0004415;GO:0004415;GO:0004415;GO:0005975;GO:0005975;GO:0006952;GO:0006952;GO:0008152;GO:0016787;GO:0016798;	-	-	-	-	Hyaluronidase[Source:UniProtKB/TrEMBL;Acc:H9JWA8]	-
BGIBMGA012900	112.013	73.5634	150.462	2.04534	1.03234	0.00246003	0.013537	scaf4	687236	694863	-	843	-	GO:0003677;GO:0003677;GO:0004003;GO:0004003;GO:0005524;GO:0005524;GO:0016818;GO:0016818;GO:0032508;	-	-	-	-	-	-
BGIBMGA003267	66.9398	42.423	91.4565	2.15582	1.10824	0.00251452	0.0138015	scaf73	968833	977466	+	579	-	-	-	-	-	-	-	-
BGIBMGA008509	36.2142	18.6888	53.7395	2.87549	1.52381	0.00258246	0.0141185	scaf2	6641153	6641917	+	765	-	GO:0016491;GO:0016491;GO:0055114;	-	-	-	-	-	101735610
BGIBMGA000298	74.8004	36.5508	113.05	3.09296	1.62899	0.00283876	0.0152758	scaf18	1870033	1882127	-	1071	-	GO:0005576;GO:0005576;GO:0006030;GO:0006030;GO:0008061;GO:0008061;	-	-	-	-	-	-
BGIBMGA006530	201.31	131.827	270.793	2.05416	1.03855	0.00296165	0.0158249	scaf11	6317429	6322155	+	696	-	GO:0006281;GO:0006281;GO:0030915;GO:0030915;	-	-	-	-	-	-
BGIBMGA000139	64.6531	41.2026	88.1037	2.1383	1.09646	0.00320603	0.016976	scaf43	1756254	1758534	+	501	-	GO:0001736;GO:0001736;GO:0004672;GO:0004672;GO:0004713;GO:0004713;GO:0005524;GO:0005524;GO:0005887;GO:0005887;GO:0006468;GO:0006468;GO:0016055;GO:0016055;GO:0018108;GO:0060026;GO:0060026;GO:0060071;GO:1904929;GO:1904929;	-	-	-	-	-	-
BGIBMGA001056	146.653	92.2665	201.04	2.1789	1.1236	0.00322986	0.0170559	scaf1	1759761	1764368	-	1026	-	GO:0006629;GO:0006629;GO:0006629;GO:0016042;GO:0016042;GO:0016042;GO:0016787;GO:0016787;GO:0016787;	-	-	-	-	Adipose triglyceride lipase brummer[Source:UniProtKB/TrEMBL;Acc:D3K9G3]	100359389
BGIBMGA007947	71.8179	46.3293	97.3066	2.10033	1.07061	0.00352372	0.0183866	scaf3	8260076	8263410	+	333	-	GO:0000166;GO:0005524;GO:0005524;GO:0016209;GO:0016491;GO:0032542;GO:0032542;GO:0032542;GO:0055114;GO:0055114;GO:0055114;GO:0098869;	-	-	-	-	Sulfiredoxin [Source:UniProtKB/TrEMBL;Acc:H9JEK0]"	-
BGIBMGA012702	93.3963	56.3245	130.468	2.31636	1.21186	0.00366551	0.0190012	scaf69	852802	855503	+	606	-	GO:0006629;GO:0006631;GO:0006633;GO:0006633;GO:0016020;GO:0016021;GO:0016021;GO:0016021;GO:0016740;GO:0102336;GO:0102336;GO:0102337;GO:0102337;GO:0102338;GO:0102338;GO:0102756;GO:0102756;	-	-	-	-	-	-
BGIBMGA008466	5.36165	0	10.7233	Inf	Inf	0.00368968	0.0190777	scaf2	3708770	3709795	+	1026	-	-	-	-	-	-	-	-
BGIBMGA005813	69.5332	38.0562	101.01	2.65423	1.4083	0.00376536	0.0193965	scaf54	1108720	1109586	+	384	-	GO:0005634;GO:0005634;GO:0046982;GO:0046982;	K11656	-	-	-	-	101740858
BGIBMGA001204	24.2902	10.8634	37.717	3.47192	1.79573	0.00378708	0.019485	scaf1	9062203	9066151	+	705	-	GO:0046872;GO:0046872;	-	-	-	-	-	-
BGIBMGA010689	42.5706	24.2902	60.851	2.50517	1.32491	0.00397588	0.0203348	scaf148	176606	178131	-	525	-	GO:0016020;GO:0016021;GO:0016021;	-	-	-	-	-	-
BGIBMGA006924	49.2777	29.2543	69.3012	2.36892	1.24423	0.00402481	0.0205363	scaf44	252890	259674	-	315	-	-	-	-	-	-	-	-
BGIBMGA012672	176.287	112.297	240.277	2.13966	1.09738	0.00423116	0.0213027	scaf69	1390933	1392578	-	879	-	GO:0003676;GO:0003676;GO:0005634;GO:0005643;GO:0005643;GO:0006913;GO:0006913;GO:0015031;GO:0015031;GO:0031965;GO:0031965;GO:0051028;GO:0051028;	K14313	-	-	-	-	101742780
BGIBMGA007093	5678.49	1775.77	9581.22	5.39552	2.43176	0.00430251	0.0215754	scaf21	3069304	3083971	+	951	-	GO:0005739;GO:0005743;GO:0005743;GO:0005743;GO:0015187;GO:0015187;GO:0015187;GO:0016020;GO:0016021;GO:0016021;GO:0022857;GO:1904983;GO:1904983;GO:1904983;	K15118	-	-	-	-	101745781
BGIBMGA011774	60.662	38.6664	82.6575	2.13771	1.09607	0.00435397	0.0217935	scaf16	938936	952575	+	966	-	GO:0003824;GO:0003824;GO:0004731;GO:0004731;GO:0004731;GO:0006139;GO:0006139;GO:0009116;GO:0009116;GO:0016740;GO:0016757;	K03783	EC:2.4.2.1	-	-	Purine nucleoside phosphorylase[Source:UniProtKB/TrEMBL;Acc:H9JQG8]	101736818
BGIBMGA008555	72.9602	47.916	98.0043	2.04534	1.03234	0.00437176	0.0218402	scaf2	10284840	10299269	+	1455	-	GO:0003824;GO:0003824;GO:0008152;	-	-	-	-	-	-
BGIBMGA003989	28.227	13.4268	43.0272	3.20459	1.68014	0.00437885	0.0218587	scaf36	3366970	3373822	-	990	-	GO:0016491;GO:0016491;GO:0055114;GO:0055114;	-	-	-	-	-	-
BGIBMGA012780	75.6867	50.3981	100.975	2.00355	1.00256	0.00442852	0.022064	scaf4	7987242	7988237	-	996	-	GO:0000166;GO:0000166;GO:0003824;GO:0003824;GO:0004775;GO:0004775;GO:0004776;GO:0004776;GO:0005739;GO:0005739;GO:0006099;GO:0006099;GO:0016874;GO:0048037;GO:0048037;	K01899	-	-	-	-	101735810
BGIBMGA000181	10.0615	2.00731	18.1158	9.0249	3.17391	0.0046095	0.0228597	scaf154	285157	292491	+	1239	-	GO:0005515;	-	-	-	-	-	-
BGIBMGA010741	45.2617	26.2975	64.2259	2.44228	1.28823	0.0049645	0.024386	scaf25	2201139	2208742	-	1416	-	GO:0005215;GO:0005215;GO:0016020;GO:0016020;GO:0016020;GO:0016021;GO:0016021;GO:0016021;GO:0022857;GO:0022857;GO:0055085;GO:0055085;	-	-	-	-	-	-
BGIBMGA010693	34.4657	18.6346	50.2967	2.6991	1.43248	0.00511925	0.0250128	scaf148	11230	11796	-	567	-	-	-	-	-	-	-	-
BGIBMGA013361	16.0331	5.60137	26.4649	4.72472	2.24023	0.00516674	0.0251637	scaf112	25302	31184	+	891	-	-	-	-	-	-	-	-
BGIBMGA008499	28.928	14.3221	43.534	3.03965	1.6039	0.00516824	0.0251637	scaf2	5946441	5954166	+	684	-	-	-	-	-	-	-	-
BGIBMGA003818	8.87004	1.55966	16.1804	10.3743	3.37495	0.00534681	0.0258312	scaf107	549447	550454	-	366	-	-	-	-	-	-	-	-
BGIBMGA010701	26.1838	10.7009	41.6666	3.89375	1.96116	0.0054055	0.0260368	scaf148	270765	282358	+	963	-	GO:0005739;GO:0006811;GO:0006811;GO:0015075;GO:0015075;GO:0016020;GO:0016020;GO:0016020;GO:0016021;GO:0016021;GO:0031966;GO:0031966;GO:0034220;GO:0055085;GO:0055085;	-	-	-	-	-	101736404
BGIBMGA004445	14.6017	4.65189	24.5516	5.27776	2.39993	0.00557341	0.0267524	scaf37	1111761	1118603	+	909	-	GO:0004252;GO:0004252;GO:0006508;GO:0006508;	-	-	-	-	-	-
BGIBMGA011587	48.7826	29.3897	68.1756	2.31971	1.21394	0.005589	0.0268006	scaf22	4617858	4623628	+	4320	-	GO:0005615;GO:0005615;	-	-	-	-	-	100272001
BGIBMGA010474	56.4266	35.7096	77.1435	2.1603	1.11123	0.00594873	0.0281904	scaf6	658697	663106	-	882	-	GO:0003777;GO:0003777;GO:0007018;GO:0007018;	-	-	-	-	-	-
BGIBMGA001198	49.3053	22.31	76.3007	3.42003	1.77401	0.00596319	0.0282485	scaf1	8859742	8873984	+	861	-	GO:0005634;GO:0005634;	-	-	-	-	-	-
BGIBMGA014116	912.274	508.343	1316.2	2.5892	1.37251	0.00600412	0.0284007	scaf76	79490	97045	-	1611	GLCNACASE3	GO:0004553;GO:0004553;GO:0004563;GO:0004563;GO:0004563;GO:0005975;GO:0005975;GO:0008152;GO:0016787;GO:0016798;GO:0102148;GO:0102148;	-	-	-	-	Beta-hexosaminidase[Source:UniProtKB/TrEMBL;Acc:H9JX51]	-
BGIBMGA009579	69.286	33.1734	105.399	3.1772	1.66776	0.00601935	0.0284519	scaf103	769124	776043	-	708	-	GO:0016311;GO:0016791;GO:0016791;	K13248	EC:3.1.3.74	-	-	-	101745817
BGIBMGA005181	32.9482	17.333	48.5633	2.80178	1.48634	0.00631871	0.0295959	scaf119	688854	693372	-	327	-	GO:0003824;GO:0003824;GO:0005992;GO:0005992;	-	-	-	-	-	-
BGIBMGA013872	15.0666	5.15372	24.9794	4.84687	2.27705	0.00632101	0.0295959	scaf62	1604691	1627469	+	885	-	GO:0003677;GO:0003677;GO:0003677;GO:0005634;GO:0005634;GO:0006355;GO:0006355;GO:0043565;GO:0043565;GO:0046872;GO:0046872;	-	-	-	-	-	-
BGIBMGA007658	38.0956	21.754	54.4373	2.50241	1.32332	0.00660722	0.0306799	scaf3	7309611	7311201	-	285	-	-	-	-	-	-	-	-
BGIBMGA006718	53.7589	34.1771	73.3408	2.14591	1.10159	0.00673469	0.0311866	scaf10	3446836	3454293	+	1020	-	GO:0016020;GO:0016021;GO:0016021;	-	-	-	-	-	-
BGIBMGA007109	62.9194	41.7857	84.053	2.01152	1.00829	0.00686878	0.0317006	scaf21	3912027	3922689	+	687	-	GO:0016020;GO:0016020;GO:0016020;GO:0016021;GO:0016021;	-	-	-	-	-	101736592
BGIBMGA004668	88.5076	55.864	121.151	2.16868	1.11682	0.00714663	0.0328069	scaf135	368034	369738	+	420	-	-	-	-	-	-	-	-
BGIBMGA002791	25.2968	11.7858	38.8077	3.29274	1.71929	0.00720325	0.0330316	scaf30	2848468	2851233	-	2766	-	-	-	-	-	-	-	101741846
BGIBMGA007853	54.6947	34.9911	74.3984	2.12621	1.08828	0.00748179	0.0340667	scaf3	3730080	3732341	+	240	-	-	-	-	-	-	-	-
BGIBMGA006943	60.4424	39.3308	81.554	2.07354	1.0521	0.00757841	0.0344216	scaf44	961193	962287	+	1095	-	GO:0003676;GO:0003676;	-	-	-	-	-	-
BGIBMGA000307	349.866	176.351	523.382	2.96784	1.56941	0.0078922	0.0355423	scaf18	1666372	1677960	-	1452	-	GO:0004181;GO:0004181;GO:0006508;GO:0006508;GO:0008270;GO:0008270;	K01294	EC:3.4.17.10	-	-	-	101740426
BGIBMGA003328	7.23855	1.03074	13.4464	13.0453	3.70546	0.00791458	0.0355977	scaf42	2053484	2054128	-	645	-	GO:0005576;GO:0005576;	-	-	-	-	-	-
BGIBMGA014006	19.922	8.72069	31.1233	3.5689	1.83548	0.008074	0.0361886	scaf29	3837876	3839421	+	333	-	GO:0016020;GO:0016021;GO:0016021;	-	-	-	-	-	-
BGIBMGA008546	106.403	70.1176	142.688	2.03498	1.02501	0.00835533	0.0371527	scaf2	9602763	9603305	+	543	-	-	-	-	-	-	-	101745870
BGIBMGA000449	18.7786	7.05267	30.5045	4.32524	2.11278	0.00860449	0.0380769	scaf18	3961027	3963606	+	618	-	-	-	-	-	-	-	-
BGIBMGA011289	158.129	91.384	224.873	2.46075	1.2991	0.00880472	0.0386976	scaf12	1242908	1248180	-	1512	-	GO:0000166;GO:0003774;GO:0003777;GO:0003777;GO:0005524;GO:0005524;GO:0005524;GO:0005874;GO:0005874;GO:0007018;GO:0007018;GO:0008017;GO:0008017;	-	-	-	-	-	-
BGIBMGA006147	18.3588	7.60868	29.109	3.82576	1.93575	0.00884511	0.0388222	scaf5	4417091	4421153	+	774	-	GO:0005102;GO:0005102;GO:0005576;GO:0005576;GO:0005576;GO:0007275;GO:0007275;GO:0007275;GO:0016055;GO:0016055;GO:0016055;	-	-	-	-	Protein Wnt [Source:UniProtKB/TrEMBL;Acc:H9J9F4]"	-
BGIBMGA007527	19.0713	8.24595	29.8967	3.62562	1.85823	0.00897729	0.0393354	scaf66	872115	872945	-	831	-	-	-	-	-	-	-	101742824
BGIBMGA001058	60.5067	40.2803	80.7332	2.00429	1.00309	0.00929538	0.0405228	scaf1	1736418	1737245	-	294	-	-	-	-	-	-	-	-
BGIBMGA004629	11.9261	3.62115	20.231	5.58692	2.48205	0.00969532	0.0419404	scaf128	540536	554836	+	1494	-	GO:0016020;GO:0016020;GO:0016020;GO:0016021;GO:0016021;GO:0016021;GO:0022857;GO:0022857;GO:0055085;GO:0055085;	-	-	-	-	-	-
BGIBMGA014350	41.4936	13.2913	69.6959	5.24372	2.39059	0.00992143	0.0427324	scaf2320	298	816	+	519	-	GO:0016020;GO:0016021;GO:0016021;	-	-	-	-	-	-
BGIBMGA012372	27.2914	12.4773	42.1055	3.37457	1.75471	0.0101662	0.0436121	scaf82	1255017	1259749	-	2628	-	GO:0000166;GO:0000723;GO:0000723;GO:0003678;GO:0003678;GO:0004386;GO:0005524;GO:0005524;GO:0006281;GO:0006281;GO:0006281;GO:0006310;GO:0006310;GO:0006974;GO:0016787;GO:0032508;	-	-	-	-	-	-
BGIBMGA000637	21.773	10.3074	33.2386	3.22472	1.68917	0.0102459	0.0439101	scaf8	2010959	2011651	+	564	-	-	-	-	-	-	-	-
BGIBMGA010771	90.6806	33.8791	147.482	4.35319	2.12207	0.0104702	0.0446343	scaf25	306683	308272	-	1026	-	-	-	-	-	-	-	101744818
BGIBMGA006371	38.4508	20.9	56.0017	2.67951	1.42197	0.010832	0.0459337	scaf11	4632058	4640503	-	2262	-	GO:0016020;GO:0016021;GO:0016021;	-	-	-	-	-	-
BGIBMGA013075	85.8742	54.2088	117.539	2.16827	1.11655	0.0110459	0.0467025	scaf4	7813373	7822152	+	1233	-	GO:0000166;GO:0004496;GO:0004496;GO:0004496;GO:0005524;GO:0005524;GO:0005524;GO:0005737;GO:0005737;GO:0005737;GO:0006629;GO:0006694;GO:0008202;GO:0008299;GO:0008299;GO:0016126;GO:0016126;GO:0016301;GO:0016310;GO:0016740;GO:0019287;GO:0019287;	-	-	-	-	-	-
BGIBMGA009643	47.0601	29.8374	64.2829	2.15444	1.10731	0.0113222	0.0476058	scaf27	4282675	4284238	-	1074	INV	-	-	-	-	-	Homeobox protein invected [Source:UniProtKB/Swiss-Prot;Acc:P27610]	-
BGIBMGA004485	14.7887	5.65554	23.9218	4.22979	2.08059	0.0122576	0.0507775	scaf37	2705509	2706489	+	207	-	-	-	-	-	-	-	-
BGIBMGA003660	48.0286	30.7056	65.3515	2.12833	1.08972	0.0134395	0.0545472	scaf9	3076051	3083667	+	1113	-	-	-	-	-	-	-	-
BGIBMGA004303	42.998	26.7993	59.1966	2.20889	1.14332	0.0134978	0.0547512	scaf79	505010	506762	-	984	-	-	-	-	-	-	-	-
BGIBMGA008597	33.042	19.0281	47.0558	2.47296	1.30624	0.0136944	0.0553893	scaf85	391126	393108	+	1872	-	GO:0005515;GO:0016020;GO:0016021;GO:0016021;	-	-	-	-	-	-
BGIBMGA006020	47.3344	30.285	64.3839	2.12593	1.08809	0.0138702	0.0559491	scaf5	2413365	2444819	-	1587	-	GO:0001522;GO:0001522;GO:0003723;GO:0003723;GO:0003723;GO:0009451;GO:0009451;GO:0009982;GO:0009982;	-	-	-	-	-	-
BGIBMGA006354	8.75419	2.11566	15.3927	7.2756	2.86307	0.0139079	0.0560659	scaf11	6148250	6154413	-	552	-	-	-	-	-	-	-	-
BGIBMGA006321	26.4661	13.9557	38.9766	2.79289	1.48176	0.0139385	0.0561718	scaf49	1656756	1669293	+	720	-	GO:0004383;GO:0004383;GO:0006182;GO:0006182;GO:0020037;GO:0020037;	-	-	-	-	-	-
BGIBMGA008324	41.6277	25.904	57.3513	2.21399	1.14665	0.0143227	0.0574691	scaf2	8339936	8340181	-	246	-	GO:0008203;GO:0008203;GO:0016042;GO:0016042;GO:0016298;GO:0016298;	-	-	-	-	-	-
BGIBMGA000619	78.4968	43.6847	113.309	2.59379	1.37506	0.0144013	0.0576948	scaf8	840181	842206	+	447	-	GO:0000413;GO:0003755;GO:0003755;GO:0005509;GO:0005509;GO:0016853;	-	-	-	-	-	-
BGIBMGA001860	13.1009	4.73315	21.4686	4.5358	2.18136	0.0146228	0.0583827	scaf28	2983851	2999620	-	537	-	-	-	-	-	-	-	-
BGIBMGA004541	379.518	209.201	549.835	2.62826	1.39411	0.0148164	0.0589911	scaf48	2701904	2702449	-	546	HSP20.4	GO:0046872;	K09542	-	-	-	Heat shock protein hsp20.4[Source:UniProtKB/TrEMBL;Acc:Q9GSB6]	692591
BGIBMGA000818	14.3129	5.68263	22.9431	4.03741	2.01343	0.01484	0.0590306	scaf89	1136767	1137372	+	606	-	GO:0008080;	-	-	-	-	-	101735376
BGIBMGA009128	19.6859	9.38504	29.9867	3.19516	1.67589	0.0149045	0.0592143	scaf96	1014763	1016618	-	1677	-	-	-	-	-	-	-	-
BGIBMGA000223	18.198	8.16468	28.2313	3.45773	1.78983	0.0150589	0.0596256	scaf18	5460692	5479652	-	1368	-	GO:0005215;GO:0005215;GO:0016020;GO:0016021;GO:0016021;GO:0016021;GO:0022857;GO:0022857;GO:0055085;GO:0055085;	-	-	-	-	-	-
BGIBMGA009235	702.399	394.424	1010.37	2.56164	1.35707	0.0150687	0.0596278	scaf38	1554493	1556832	-	2340	-	-	-	-	-	-	-	-
BGIBMGA004557	32.8361	19.0552	46.617	2.44642	1.29067	0.0150801	0.0596365	scaf48	1418297	1428559	-	753	-	-	-	-	-	-	-	-
BGIBMGA012371	48.8852	29.2001	68.5704	2.34829	1.23161	0.0154139	0.0606591	scaf82	1427652	1438039	-	1056	-	GO:0016020;GO:0016020;GO:0016020;GO:0016021;GO:0016021;GO:0030001;GO:0030001;GO:0046873;GO:0046873;GO:0055085;GO:0055085;	-	-	-	-	-	-
BGIBMGA010868	39.955	24.494	55.4159	2.26243	1.17787	0.0155199	0.0609934	scaf61	864041	865099	-	1059	SGF3	GO:0003677;GO:0003677;GO:0003677;GO:0003700;GO:0003700;GO:0005634;GO:0005634;GO:0006351;GO:0006351;GO:0006355;GO:0006355;GO:0006355;GO:0043565;GO:0043565;	-	-	-	-	Silk gland factor 3[Source:UniProtKB/TrEMBL;Acc:H9JMW5]	-
BGIBMGA006143	32.4343	17.8348	47.0338	2.63718	1.399	0.0155457	0.0610474	scaf5	4126755	4127294	+	540	-	GO:0003677;GO:0003677;GO:0005634;GO:0005634;	-	-	-	-	-	-
BGIBMGA005354	50.1916	33.3773	67.0059	2.00753	1.00542	0.0172466	0.0661761	scaf19	2545421	2549634	-	309	-	-	-	-	-	-	-	-
BGIBMGA003641	11.6877	4.12297	19.2524	4.66953	2.22328	0.0178884	0.0681725	scaf9	2319969	2320688	+	720	-	GO:0003677;GO:0003700;GO:0003700;GO:0005634;GO:0005634;GO:0006351;GO:0006355;GO:0006355;GO:0043565;GO:0043565;	-	-	-	-	-	-
BGIBMGA010168	35.9306	22.0933	49.7679	2.25263	1.17161	0.0187938	0.0709732	scaf15	1481095	1482625	-	1311	PP-BP	GO:0005576;GO:0005576;	-	-	-	-	30K protein 13; Putative paralytic peptide-bindingprotein [Source:UniProtKB/TrEMBL;Acc:Q2PQU4]	692790
BGIBMGA013220	42.1696	26.7181	57.6212	2.15664	1.10878	0.0189428	0.0714105	scaf39	1025072	1025821	+	750	-	-	-	-	-	-	-	101741138
BGIBMGA001273	10.8235	3.62115	18.0258	4.97793	2.31554	0.0194164	0.0728765	scaf1	12952569	12956594	+	699	-	GO:0016491;GO:0016491;GO:0055114;GO:0055114;	-	-	-	-	-	-
BGIBMGA011335	21.1486	9.2496	33.0476	3.57287	1.83708	0.0207105	0.0765755	scaf12	2159105	2160588	+	801	-	-	-	-	-	-	-	-
BGIBMGA006180	36.9926	23.0698	50.9155	2.20702	1.1421	0.0209519	0.0773129	scaf5	6080737	6111088	+	3693	-	GO:0006508;GO:0006508;GO:0008236;GO:0008236;GO:0016491;GO:0016491;GO:0055114;GO:0055114;	-	-	-	-	-	-
BGIBMGA009448	175.917	108.894	242.94	2.23098	1.15768	0.021305	0.0784365	scaf40	2208520	2214076	-	657	-	-	-	-	-	-	-	101736168
BGIBMGA004582	17.4633	8.19177	26.7348	3.26362	1.70647	0.0222378	0.081153	scaf48	801968	812082	+	1239	-	GO:0003677;GO:0003700;GO:0003700;GO:0005634;GO:0005634;GO:0006351;GO:0006355;GO:0006355;GO:0043565;GO:0043565;	-	-	-	-	-	-
BGIBMGA009361	106.857	67.7853	145.929	2.15281	1.10622	0.0226096	0.0822537	scaf53	376131	381877	+	609	-	GO:0003924;GO:0003924;GO:0005525;GO:0005525;	K07917	-	-	-	-	101737287
BGIBMGA009997	7.17318	1.58675	12.7596	8.04137	3.00744	0.0244644	0.0876913	scaf170	42495	46499	+	729	-	-	-	-	-	-	-	-
BGIBMGA012988	12.0827	4.73315	19.4323	4.10557	2.03758	0.0245199	0.087817	scaf4	3844688	3845532	+	348	-	-	-	-	-	-	-	-
BGIBMGA009433	30.5668	18.4992	42.6343	2.30466	1.20455	0.024577	0.0879588	scaf40	3564911	3565402	-	156	-	-	-	-	-	-	-	-
BGIBMGA004486	40.823	26.691	54.9551	2.05894	1.0419	0.0253908	0.09021	scaf37	2733224	2740500	+	1197	-	GO:0016020;GO:0016021;GO:0016021;GO:0016021;GO:0022857;GO:0022857;GO:0055085;GO:0055085;	-	-	-	-	-	-
BGIBMGA012993	11.7777	4.65189	18.9035	4.06362	2.02276	0.0288251	0.099534	scaf4	4178256	4179238	+	264	-	-	-	-	-	-	-	-
BGIBMGA000451	13.2157	5.68263	20.7489	3.65127	1.8684	0.0297608	0.102245	scaf18	4037744	4040406	+	363	-	-	-	-	-	-	-	-
BGIBMGA012386	10.3137	3.64823	16.9792	4.65408	2.2185	0.0300297	0.102991	scaf82	570794	572440	+	1143	-	GO:0004497;GO:0004497;GO:0005506;GO:0005506;GO:0016491;GO:0016705;GO:0016705;GO:0020037;GO:0020037;GO:0046872;GO:0055114;GO:0055114;GO:0055114;	-	-	-	-	-	-
BGIBMGA009687	9.34048	3.11932	15.5616	4.98879	2.31869	0.0300962	0.103178	scaf27	1239351	1239851	-	339	-	-	-	-	-	-	-	-
BGIBMGA002583	22.2522	12.2335	32.2709	2.63792	1.3994	0.0308489	0.105255	scaf20	4373867	4374115	-	249	-	-	-	-	-	-	-	-
BGIBMGA009882	24.6074	12.7353	36.4794	2.86443	1.51825	0.0315429	0.107057	scaf51	700581	717077	+	699	-	-	-	-	-	-	-	-
BGIBMGA012534	46.1321	29.7148	62.5495	2.105	1.07382	0.033049	0.11141	scaf77	1025741	1027775	-	456	-	GO:0007267;GO:0007267;	-	-	-	-	-	-
BGIBMGA002542	33.9112	14.0369	53.7854	3.83171	1.93799	0.03564	0.117983	scaf14	5535237	5544013	+	1350	-	GO:0000166;GO:0003924;GO:0003924;GO:0003924;GO:0005200;GO:0005200;GO:0005525;GO:0005525;GO:0005525;GO:0005737;GO:0005737;GO:0005856;GO:0005874;GO:0005874;GO:0005874;GO:0007010;GO:0007017;GO:0007017;	-	-	-	-	-	-
BGIBMGA014290	34.7885	22.6222	46.9548	2.07561	1.05354	0.0368839	0.121292	scaf815	2649	3534	+	369	-	-	-	-	-	-	-	-
BGIBMGA007872	5.66311	1.03074	10.2955	9.98839	3.32025	0.0374631	0.122665	scaf3	4197590	4198472	+	573	-	-	-	-	-	-	-	-
BGIBMGA003553	21.3442	11.8129	30.8754	2.6137	1.38609	0.0382712	0.12471	scaf9	2059544	2070266	-	804	-	GO:0016020;GO:0016021;GO:0016021;	-	-	-	-	-	101740465
BGIBMGA012398	8.11271	2.50914	13.7163	5.46653	2.45063	0.0396646	0.128274	scaf82	1664306	1668792	+	315	-	GO:0055114;GO:0055114;	-	-	-	-	-	-
BGIBMGA001582	24.3091	14.3221	34.2962	2.39464	1.25981	0.0411367	0.13208	scaf7	6867620	6870135	+	267	-	-	-	-	-	-	-	-
BGIBMGA002646	14.2475	6.76755	21.7275	3.21055	1.68282	0.0424618	0.135659	scaf20	220081	220323	-	243	-	-	-	-	-	-	-	-
BGIBMGA000348	13.1843	6.23864	20.1301	3.22668	1.69005	0.0449974	0.142045	scaf18	288419	290584	-	828	CPR149	GO:0042302;GO:0042302;GO:0042302;	-	-	-	-	Putative cuticle protein CPR149[Source:UniProtKB/TrEMBL;Acc:D0VEM2]	-
BGIBMGA004458	8.89359	3.09223	14.695	4.75222	2.2486	0.0461919	0.145239	scaf37	1688090	1692799	+	381	-	GO:0060271;	-	-	-	-	-	-
BGIBMGA011918	6.20001	1.58675	10.8133	6.81474	2.76866	0.0469609	0.147153	scaf59	964154	967076	-	1218	-	GO:0004930;GO:0004930;GO:0004930;GO:0007165;GO:0007186;GO:0007186;GO:0007186;GO:0016020;GO:0016021;GO:0016021;GO:0016021;	K04134	-	-	-	-	101746094
BGIBMGA000010	4.29602	0.501828	8.09021	16.1215	4.01091	0.0470799	0.14736	scaf98	810283	816094	-	723	OSI9	GO:0016020;GO:0016021;GO:0016021;	-	-	-	-	Osiris 9 [Source:UniProtKB/TrEMBL;Acc:B6DXB0]"	100190962
BGIBMGA000318	3.07744	0	6.15488	Inf	Inf	0.0481372	0.14988	scaf18	889795	890052	-	258	-	-	-	-	-	-	-	-
BGIBMGA005958	22.7416	13.2913	32.1919	2.42203	1.27622	0.0481459	0.14988	scaf5	7059983	7068731	-	846	-	-	-	-	-	-	-	101735520
BGIBMGA008696	5.25019	1.00366	9.49673	9.46214	3.24217	0.0487851	0.151312	scaf90	97382	99315	-	414	-	-	-	-	-	-	-	-
BGIBMGA001399	1878.41	3317.06	439.76	0.132575	-2.91512	1.32837e-103	1.71413e-99	scaf7	6827311	6837724	-	1011	-	GO:0005975;GO:0005975;GO:0005975;GO:0016311;GO:0016787;GO:0016791;GO:0016791;GO:0042132;GO:0042132;GO:0042578;GO:0042578;	K03841	EC:3.1.3.11	-	-	Fructose-1,6-bisphosphatase[Source:UniProtKB/TrEMBL;Acc:Q1HQ57]	732915
BGIBMGA004276	7922.29	13248.4	2596.14	0.195958	-2.35138	1.88707e-92	1.21754e-88	scaf79	1184485	1196931	-	1914	-	GO:0004611;GO:0004611;GO:0004613;GO:0004613;GO:0005525;GO:0005525;GO:0006094;GO:0006094;GO:0017076;GO:0017076;	-	-	-	-	-	-
BGIBMGA012838	4531.35	7528.39	1534.31	0.203803	-2.29475	1.06398e-82	4.57655e-79	scaf4	4244120	4250275	-	726	-	-	-	-	-	-	-	-
BGIBMGA013492	1068.6	1927.89	209.308	0.108568	-3.20333	2.03812e-82	5.87871e-79	scaf101	275853	279751	-	2241	-	GO:0005515;GO:0016020;GO:0016021;GO:0016021;	-	-	-	-	-	101741626
BGIBMGA008421	1670.91	2909.72	432.096	0.148501	-2.75146	2.27786e-82	5.87871e-79	scaf2	736972	768509	+	3645	-	GO:0005506;GO:0005506;GO:0016491;GO:0016491;GO:0016614;GO:0046872;GO:0046872;GO:0046872;GO:0050660;GO:0050660;GO:0051536;GO:0051537;GO:0051537;GO:0055114;GO:0055114;GO:0071949;GO:0071949;	-	-	-	-	-	-
BGIBMGA007675	2754.45	4687.57	821.34	0.175217	-2.51279	1.93398e-81	4.15934e-78	scaf3	5988208	5988738	-	228	-	GO:0016020;GO:0016021;GO:0016021;	-	-	-	-	-	-
BGIBMGA006335	19370.5	30223.6	8517.45	0.281815	-1.82718	6.7345e-62	1.24146e-58	scaf49	2275116	2276597	+	1482	-	-	-	-	-	-	-	101743105
BGIBMGA006017	9143.09	14085.1	4201.05	0.298261	-1.74535	3.20036e-54	5.16218e-51	scaf5	3248067	3248396	-	330	-	-	-	-	-	-	-	-
BGIBMGA001182	18116.4	27244.3	8988.62	0.329927	-1.59978	5.0091e-49	6.46374e-46	scaf1	7876736	7883446	+	3951	-	-	-	-	-	-	-	-
BGIBMGA005097	2392.31	3716.86	1067.76	0.287274	-1.7995	1.99752e-47	2.34327e-44	scaf32	24432	25823	+	1074	-	-	-	-	-	-	-	-
BGIBMGA013616	2018.78	3114.44	923.133	0.296404	-1.75436	3.62867e-44	3.90203e-41	scaf78	449789	476684	+	3360	-	GO:0005509;GO:0005509;GO:0005886;GO:0005886;GO:0007155;GO:0007155;GO:0007156;GO:0007156;GO:0016020;GO:0016020;GO:0016020;GO:0016021;GO:0016021;	-	-	-	-	-	-
BGIBMGA007697	1035.45	1651.39	419.52	0.254041	-1.97687	3.88873e-43	3.5843e-40	scaf3	4387186	4387992	-	807	-	GO:0043565;GO:0043565;	-	-	-	-	-	101736485
BGIBMGA007573	1138.75	1791.5	485.995	0.271278	-1.88216	1.6585e-41	1.33758e-38	scaf66	909979	923292	+	2559	-	GO:0004649;GO:0004649;GO:0005975;GO:0005975;	-	-	-	-	-	-
BGIBMGA006018	2237.51	3409.07	1065.96	0.312683	-1.67723	1.76512e-41	1.33983e-38	scaf5	3182792	3183163	-	372	-	-	K20701	-	-	-	-	101738751
BGIBMGA001347	235.516	423.854	47.1788	0.111309	-3.16735	1.14725e-39	7.79163e-37	scaf118	605960	609092	-	663	P25	GO:0005198;GO:0005198;GO:0005198;GO:0005576;GO:0005576;GO:0005576;	-	-	-	-	Fibrohexamerin [Source:UniProtKB/Swiss-Prot;Acc:P04148]	-
BGIBMGA012479	1797.86	2745.24	850.482	0.309803	-1.69058	1.48199e-39	9.56183e-37	scaf56	366145	375670	-	2511	-	GO:0008270;GO:0008270;	-	-	-	-	-	-
BGIBMGA002635	33978.9	49232.9	18724.9	0.380333	-1.39466	2.1183e-38	1.24248e-35	scaf20	460294	466597	-	1404	-	GO:0005215;GO:0005215;GO:0016020;GO:0016020;GO:0016020;GO:0016021;GO:0016021;GO:0016021;GO:0022857;GO:0022857;GO:0055085;GO:0055085;	-	-	-	-	-	-
BGIBMGA004178	2596.98	3837.37	1356.59	0.353521	-1.50013	2.3996e-35	1.34628e-32	scaf60	565557	573691	+	1155	-	GO:0006869;GO:0006869;	-	-	-	-	Oxysterol-binding protein[Source:UniProtKB/TrEMBL;Acc:H9J3T9]	-
BGIBMGA002611	5379.38	7815.33	2943.43	0.376622	-1.40881	3.19426e-35	1.71745e-32	scaf20	2291042	2302639	-	2580	-	GO:0005515;GO:0010468;GO:0010468;GO:0046872;GO:0046872;GO:0071557;GO:0071557;GO:0071558;GO:0071558;	-	-	-	-	-	-
BGIBMGA006613	9654.92	13922.3	5387.5	0.386968	-1.36971	1.60127e-34	8.26511e-32	scaf10	4040363	4054326	-	4554	-	-	-	-	-	-	-	-
BGIBMGA003682	2573.33	3789.39	1357.27	0.358176	-1.48126	1.85367e-34	9.1999e-32	scaf9	4061133	4063861	+	747	-	GO:0005515;	-	-	-	-	-	-
BGIBMGA007729	904.705	1397.01	412.397	0.295199	-1.76024	2.61394e-33	1.24927e-30	scaf3	1284537	1290944	-	1242	-	GO:0005615;GO:0005615;	-	-	-	-	-	100126553
BGIBMGA005211	684.29	1142.94	225.637	0.197418	-2.34068	8.12355e-33	3.7438e-30	scaf119	530161	531578	+	1254	-	-	-	-	-	-	-	-
BGIBMGA004665	270.002	464.268	75.737	0.163132	-2.61589	2.71912e-32	1.20991e-29	scaf135	284105	284491	+	387	-	-	-	-	-	-	-	-
BGIBMGA011276	3870.92	5540.43	2201.42	0.397337	-1.33156	7.87806e-31	3.08056e-28	scaf12	1916600	1921739	-	501	-	-	-	-	-	-	-	-
BGIBMGA008915	646.034	1008.79	283.281	0.280813	-1.83232	1.95699e-30	7.01473e-28	scaf17	1480331	1481056	-	726	-	GO:0003677;GO:0003677;GO:0005634;GO:0005634;GO:0006351;GO:0006351;GO:0006355;GO:0006355;GO:0006355;GO:0046983;GO:0046983;	-	-	-	-	-	-
BGIBMGA000073	1238.98	1848.19	629.773	0.340751	-1.55321	2.22885e-30	7.77325e-28	scaf43	2389587	2396756	-	951	-	GO:0003677;GO:0003677;GO:0005634;GO:0005634;	-	-	-	-	-	-
BGIBMGA005266	1615.67	2748.76	482.58	0.175563	-2.50994	5.73676e-30	1.94808e-27	scaf58	56770	61320	-	819	-	GO:0005506;GO:0005506;GO:0016705;GO:0016705;GO:0020037;GO:0020037;GO:0055114;GO:0055114;	-	-	-	-	-	-
BGIBMGA009933	22324.7	31995.8	12653.6	0.395478	-1.33833	1.82052e-29	6.02357e-27	scaf137	275089	296011	-	2346	-	-	-	-	-	-	-	-
BGIBMGA014370	1531.92	2247.16	816.671	0.363424	-1.46028	6.36538e-29	2.05347e-26	scaf155	50598	59265	-	3057	-	GO:0005515;GO:0007165;GO:0007165;GO:0016020;GO:0016021;GO:0016021;	-	-	-	-	-	-
BGIBMGA013604	185.536	325.321	45.7503	0.140631	-2.83001	9.46685e-28	2.90858e-25	scaf78	119642	122829	-	1065	-	GO:0003676;GO:0003676;GO:0003723;GO:0003730;GO:0003730;GO:0006417;GO:0006417;GO:0045182;GO:0045182;	-	-	-	-	-	-
BGIBMGA012070	448.368	711.146	185.59	0.260973	-1.93803	1.47637e-27	4.43048e-25	scaf24	681990	690584	-	603	-	GO:0005515;GO:0005634;GO:0005634;GO:0006511;GO:0006511;GO:0007275;GO:0007275;GO:0008270;GO:0008270;GO:0046872;	-	-	-	-	-	-
BGIBMGA005342	2324.63	3316.04	1333.21	0.402048	-1.31456	2.23224e-27	6.54655e-25	scaf19	3420475	3426241	-	1326	-	GO:0004843;GO:0004843;GO:0005622;GO:0005622;GO:0006508;GO:0006511;GO:0006511;GO:0006511;GO:0008233;GO:0008234;GO:0016787;GO:0036459;	-	-	-	-	-	-
BGIBMGA002432	1727.8	2574.25	881.341	0.342368	-1.54638	2.3757e-27	6.81245e-25	scaf14	1291644	1312807	-	2511	-	GO:0000220;GO:0000220;GO:0006811;GO:0015078;GO:0015078;GO:0015991;GO:0015991;GO:0016020;GO:0016021;GO:0016021;GO:0033179;GO:0033179;	-	-	-	-	-	-
BGIBMGA013098	3624.02	5259.45	1988.59	0.378098	-1.40317	2.73382e-27	7.66895e-25	scaf4	8823434	8827610	+	768	-	-	-	-	-	-	-	-
BGIBMGA006415	7597.08	11581.3	3612.89	0.31196	-1.68057	9.8465e-27	2.59305e-24	scaf11	1240114	1242300	-	1539	CBZ	GO:0003700;GO:0003700;GO:0006355;GO:0006355;	-	-	-	-	Chorion b-ZIP transcription factor[Source:UniProtKB/TrEMBL;Acc:Q538A5]	692648
BGIBMGA013299	1525.09	2201.44	848.736	0.385538	-1.37506	3.573e-26	8.69924e-24	scaf71	612593	627389	-	1980	-	GO:0005975;GO:0005975;GO:0016773;GO:0016773;	-	-	-	-	-	-
BGIBMGA001566	197.56	337.826	57.2944	0.169597	-2.55981	2.42846e-25	5.40291e-23	scaf7	5745769	5763125	+	5877	-	GO:0005622;GO:0005622;GO:0007268;GO:0007268;GO:0019992;GO:0019992;GO:0035556;GO:0035556;GO:0046872;GO:0046872;	-	-	-	-	-	-
BGIBMGA011477	313.724	509.864	117.584	0.230617	-2.11643	2.97602e-25	6.50891e-23	scaf22	1335961	1350007	-	1362	-	GO:0000166;GO:0001678;GO:0001678;GO:0004396;GO:0004396;GO:0004396;GO:0005524;GO:0005524;GO:0005524;GO:0005536;GO:0005536;GO:0005623;GO:0005623;GO:0005975;GO:0005975;GO:0006096;GO:0006096;GO:0006096;GO:0016301;GO:0016310;GO:0016740;GO:0016773;GO:0016773;GO:0046835;	K00844	EC:2.7.1.1	-	-	-	101745054
BGIBMGA012892	1265.7	1832.28	699.119	0.381556	-1.39003	3.88238e-25	8.3497e-23	scaf4	1134195	1147579	-	1338	-	GO:0003824;GO:0003824;GO:0008152;	-	-	-	-	-	-
BGIBMGA002197	1314.2	1962.63	665.764	0.33922	-1.55971	9.27166e-25	1.9297e-22	scaf64	2183886	2194054	+	3735	-	GO:0000166;GO:0004383;GO:0004383;GO:0004383;GO:0004672;GO:0004672;GO:0005524;GO:0005524;GO:0005622;GO:0005622;GO:0006182;GO:0006182;GO:0006182;GO:0006468;GO:0006468;GO:0009190;GO:0009190;GO:0016020;GO:0016021;GO:0016021;GO:0016829;GO:0016849;GO:0016849;GO:0035556;GO:0035556;	K12322	EC:4.6.1.2	-	-	Guanylate cyclase[Source:UniProtKB/TrEMBL;Acc:H9IY64]	101740270
BGIBMGA006426	28661.4	39036.6	18286.2	0.468438	-1.09407	2.46702e-24	5.05307e-22	scaf11	895454	897614	-	1047	-	GO:0005515;	-	-	-	-	-	-
BGIBMGA002851	2670.92	3729.01	1612.83	0.432508	-1.2092	6.43478e-24	1.27745e-21	scaf30	7111	9775	+	1770	-	GO:0004888;GO:0004888;GO:0004930;GO:0004930;GO:0007166;GO:0007166;GO:0007186;GO:0007186;GO:0016020;GO:0016021;GO:0016021;GO:0016021;	K04599	-	-	-	-	101745169
BGIBMGA003680	431.137	752.175	110.099	0.146375	-2.77226	1.24289e-23	2.39377e-21	scaf9	3941440	3944628	+	1122	-	GO:0046872;GO:0046872;GO:0046872;	-	-	-	-	-	-
BGIBMGA011198	1227.41	1879.2	575.626	0.306314	-1.70691	1.29462e-23	2.45672e-21	scaf12	4955422	4975881	-	3429	-	-	-	-	-	-	-	-
BGIBMGA000590	2752.71	3831.93	1673.5	0.436723	-1.19521	1.6633e-23	3.11062e-21	scaf8	1029153	1031000	-	345	-	GO:0008083;GO:0008083;GO:0010469;	-	-	-	-	-	-
BGIBMGA005599	2173.55	3046.25	1300.84	0.427031	-1.22759	1.76588e-23	3.25527e-21	scaf33	41273	44809	+	561	-	GO:0005515;	-	-	-	-	-	-
BGIBMGA002539	3373.49	4658.84	2088.14	0.44821	-1.15775	3.60455e-23	6.46015e-21	scaf14	5424635	5436986	+	1848	-	GO:0006811;GO:0015078;GO:0015078;GO:0015991;GO:0015991;GO:0016020;GO:0016021;GO:0016021;GO:0033179;GO:0033179;	-	-	-	-	-	-
BGIBMGA006873	1832.38	2576.64	1088.12	0.422303	-1.24365	5.29249e-23	9.22896e-21	scaf70	1316194	1330235	+	2223	-	GO:0005515;GO:0016020;GO:0016021;GO:0016021;	-	-	-	-	-	-
BGIBMGA010306	701.908	1036.43	367.387	0.354474	-1.49625	8.0271e-23	1.34522e-20	scaf127	110679	115196	+	1188	-	GO:0004252;GO:0004252;GO:0006508;GO:0006508;GO:0006508;GO:0008233;GO:0008236;GO:0016787;	-	-	-	-	-	-
BGIBMGA012680	1150.76	1646.7	654.83	0.397662	-1.33038	9.97745e-23	1.65063e-20	scaf69	889206	899447	-	570	-	GO:0046872;GO:0046872;	-	-	-	-	-	-
BGIBMGA002618	24879.9	33537.2	16222.6	0.483722	-1.04775	1.25994e-22	2.05801e-20	scaf20	1686069	1690954	-	2196	-	GO:0005515;	-	-	-	-	-	-
BGIBMGA013173	2258.79	3286.06	1231.52	0.37477	-1.41592	1.35304e-22	2.18246e-20	scaf39	2031002	2050733	-	1209	-	GO:0046983;GO:0046983;	-	-	-	-	-	-
BGIBMGA007487	826.159	1206.99	445.331	0.368961	-1.43846	1.48126e-22	2.35977e-20	scaf102	942845	951322	+	900	-	GO:0016020;GO:0016021;GO:0016021;GO:0022857;GO:0022857;GO:0055085;GO:0055085;	-	-	-	-	-	-
BGIBMGA002660	3085.42	4241.67	1929.17	0.454814	-1.13665	2.07226e-22	3.26102e-20	scaf20	451872	460152	+	1572	-	GO:0004553;GO:0004553;GO:0005975;GO:0005975;	-	-	-	-	-	-
BGIBMGA002433	217.358	358.957	75.759	0.211053	-2.24432	4.86714e-22	7.38889e-20	scaf14	1218057	1224476	-	2007	-	-	-	-	-	-	-	-
BGIBMGA008006	525.711	794.391	257.031	0.323557	-1.62791	5.7843e-22	8.57938e-20	scaf41	1574565	1577208	-	1272	-	GO:1990817;GO:1990817;	-	-	-	-	-	-
BGIBMGA009298	2614.93	4046.8	1183.06	0.292343	-1.77427	1.02804e-21	1.49054e-19	scaf38	3612292	3617247	+	1128	-	GO:0016301;GO:0016301;GO:0016301;GO:0016310;GO:0016740;GO:0032958;GO:0032958;	-	-	-	-	-	-
BGIBMGA009269	1648.49	2304.57	992.412	0.430629	-1.21548	1.39455e-21	1.99947e-19	scaf38	1380622	1398931	+	3801	-	-	-	-	-	-	-	-
BGIBMGA003681	1530.29	2143.12	917.452	0.428091	-1.22401	1.96578e-21	2.78751e-19	scaf9	4023873	4024349	+	477	-	GO:0005515;	-	-	-	-	-	-
BGIBMGA010363	3925.61	5353.19	2498.02	0.466641	-1.09961	2.09644e-21	2.94048e-19	scaf6	7987831	8032140	-	9987	-	GO:0005515;GO:0016020;GO:0016021;GO:0016021;	-	-	-	-	-	-
BGIBMGA003036	1796.01	2503.26	1088.77	0.434939	-1.20111	2.50771e-21	3.47951e-19	scaf13	3043325	3046900	-	1533	-	GO:0004930;GO:0004930;GO:0007186;GO:0007186;GO:0016020;GO:0016021;GO:0016021;GO:0016021;	-	-	-	-	-	-
BGIBMGA009132	72618	96990.7	48245.3	0.497422	-1.00746	2.99468e-21	4.06772e-19	scaf96	924094	929331	-	1344	BMTUB2	GO:0000166;GO:0003924;GO:0003924;GO:0003924;GO:0005200;GO:0005200;GO:0005525;GO:0005525;GO:0005525;GO:0005737;GO:0005737;GO:0005856;GO:0005874;GO:0005874;GO:0005874;GO:0007010;GO:0007017;GO:0007017;	K07375	-	-	-	Beta-tubulin [Source:UniProtKB/TrEMBL;Acc:Q8T8B2]"	692511
BGIBMGA013849	728.982	1062.93	395.034	0.371646	-1.428	3.55403e-21	4.68694e-19	scaf62	156885	157913	+	1029	-	GO:0005615;GO:0005615;	-	-	-	-	-	-
BGIBMGA002435	736.47	1071.86	401.075	0.374185	-1.41818	3.55952e-21	4.68694e-19	scaf14	1178019	1195310	-	1467	-	-	-	-	-	-	-	-
BGIBMGA001732	3373.92	5625.14	1122.7	0.199586	-2.32492	4.45987e-21	5.75502e-19	scaf35	572010	575232	+	645	-	GO:0005740;GO:0005740;GO:0016020;GO:0016021;GO:0016021;GO:0016021;GO:0043065;GO:0043065;	-	-	-	-	-	-
BGIBMGA012677	744.071	1080.17	407.974	0.377695	-1.40471	8.43988e-21	1.0783e-18	scaf69	1000877	1002754	-	732	-	-	-	-	-	-	-	-
BGIBMGA014040	738.585	1070.92	406.251	0.379349	-1.3984	1.03383e-20	1.2952e-18	scaf204	45078	57727	+	5307	-	GO:0005201;GO:0005201;GO:0005581;GO:0005581;GO:0005581;GO:0005604;	-	-	-	-	-	-
BGIBMGA010596	2422.85	3324.02	1521.68	0.457785	-1.12726	1.06913e-20	1.32655e-18	scaf145	208327	210768	+	2442	-	GO:0003677;GO:0003677;GO:0005634;GO:0005634;GO:0046872;GO:0046872;	K11446	EC:1.14.11.-	-	-	-	100533205
BGIBMGA011309	11708.1	15644.3	7772	0.496794	-1.00928	1.12424e-20	1.38164e-18	scaf12	682797	691133	+	4146	-	-	-	-	-	-	-	-
BGIBMGA004806	846.922	1214.69	479.151	0.394463	-1.34204	1.16111e-20	1.41348e-18	scaf46	1466982	1506269	-	8526	-	GO:0031409;GO:0031409;	-	-	-	-	-	-
BGIBMGA007087	6646.49	8931.62	4361.36	0.488305	-1.03414	1.32384e-20	1.58174e-18	scaf21	2474064	2477412	+	225	-	GO:0016020;GO:0016021;GO:0016021;GO:0019991;GO:0019991;	-	-	-	-	-	-
BGIBMGA013160	1470.13	2272.51	667.746	0.293836	-1.76692	1.36232e-20	1.61278e-18	scaf39	3057410	3058162	-	753	-	GO:0016491;GO:0016491;GO:0055114;	-	-	-	-	-	105842801
BGIBMGA009238	827.792	1191.96	463.627	0.388962	-1.3623	1.80844e-20	2.10235e-18	scaf38	943936	954364	-	2082	-	-	-	-	-	-	-	-
BGIBMGA013819	4961.22	6940.41	2982.04	0.429663	-1.21872	2.01486e-20	2.30086e-18	scaf62	1849842	1858940	-	2001	-	GO:0005737;GO:0005737;GO:0006629;GO:0006629;GO:0016020;GO:0016021;GO:0016021;GO:0016021;GO:0016627;GO:0016627;GO:0055114;	-	-	-	-	-	-
BGIBMGA006136	584.501	860.564	308.438	0.358414	-1.4803	2.10603e-20	2.38388e-18	scaf5	3641106	3647485	+	699	-	GO:0004672;GO:0004672;GO:0005524;GO:0005524;GO:0006468;GO:0006468;	-	-	-	-	-	-
BGIBMGA013619	410.215	623.275	197.156	0.316323	-1.66053	2.23212e-20	2.50464e-18	scaf78	503773	512198	+	672	-	GO:0016020;GO:0016021;GO:0016021;	-	-	-	-	-	-
BGIBMGA010407	613.754	901.617	325.891	0.361452	-1.46812	2.32796e-20	2.58965e-18	scaf6	4786990	4789721	-	945	-	-	-	-	-	-	-	-
BGIBMGA006686	891.601	1274.7	508.499	0.398916	-1.32584	3.36417e-20	3.67892e-18	scaf10	1810409	1815624	+	2598	-	GO:0001104;GO:0003712;GO:0003712;GO:0005634;GO:0006351;GO:0006357;GO:0006357;GO:0016592;GO:0016592;	-	-	-	-	-	-
BGIBMGA002596	4431.58	6318.68	2544.47	0.40269	-1.31226	3.50798e-20	3.80395e-18	scaf20	2906245	2920578	-	3858	-	GO:0016740;GO:0016757;GO:0016757;	-	-	-	-	-	-
BGIBMGA012699	1268.09	1774.98	761.194	0.428847	-1.22147	3.77352e-20	4.0578e-18	scaf69	691978	700845	+	5823	-	GO:0006211;GO:0070579;GO:0080111;	-	-	-	-	-	-
BGIBMGA010598	1891.15	2626.56	1155.73	0.440019	-1.18436	8.73122e-20	8.97125e-18	scaf234	45340	47340	-	966	-	-	-	-	-	-	-	105841884
BGIBMGA012074	607.88	889.329	326.431	0.367053	-1.44594	8.7599e-20	8.97125e-18	scaf24	297792	299098	-	1056	-	-	-	-	-	-	-	101738147
BGIBMGA007021	894.311	1273.07	515.556	0.404972	-1.30411	1.55921e-19	1.58425e-17	scaf21	2208669	2211985	-	768	-	GO:0003924;GO:0003924;GO:0005525;GO:0005525;	-	-	-	-	-	-
BGIBMGA013483	159.851	270.013	49.6889	0.184024	-2.44204	1.67518e-19	1.6757e-17	scaf101	970192	973388	-	564	-	GO:0004601;GO:0004601;GO:0006979;GO:0006979;GO:0020037;GO:0020037;GO:0055114;GO:0055114;GO:0098869;	-	-	-	-	-	-
BGIBMGA006238	172.521	286.601	58.442	0.203914	-2.29397	2.01854e-19	2.00363e-17	scaf88	702225	705323	-	423	-	-	-	-	-	-	-	101739535
BGIBMGA004335	678.212	978.774	377.649	0.385839	-1.37393	3.11197e-19	3.01931e-17	scaf79	1042179	1046966	+	984	-	-	-	-	-	-	-	-
BGIBMGA001564	127.091	219.955	34.2283	0.155615	-2.68395	4.0588e-19	3.87961e-17	scaf7	5545416	5554980	+	1839	-	-	-	-	-	-	-	-
BGIBMGA010338	3093.05	4722.04	1464.06	0.310047	-1.68944	4.33487e-19	4.11303e-17	scaf109	339058	376457	+	2706	-	GO:0016491;GO:0016491;GO:0055114;GO:0055114;	-	-	-	-	-	-
BGIBMGA008221	4671.95	6461.76	2882.14	0.446031	-1.16479	5.86451e-19	5.48374e-17	scaf121	188896	195647	-	465	PP	GO:0005622;GO:0005622;GO:0032367;GO:0032367;	K13443	-	-	-	Promoting protein[Source:UniProtKB/TrEMBL;Acc:Q69FX2]	692685
BGIBMGA003874	1875.99	2564.27	1187.72	0.463179	-1.11036	6.57463e-19	6.10353e-17	scaf72	114424	122687	-	858	-	GO:0003700;GO:0003700;GO:0006355;GO:0006355;GO:0006357;	-	-	-	-	-	-
BGIBMGA011614	385.536	585.719	185.353	0.316454	-1.65993	6.82552e-19	6.29118e-17	scaf16	5382902	5388152	-	498	-	GO:0004842;GO:0004842;GO:0016020;GO:0016021;GO:0016021;GO:0016567;GO:0016567;GO:0016740;GO:0046872;GO:0046872;	-	-	-	-	-	-
BGIBMGA004378	513.93	791.343	236.517	0.29888	-1.74236	1.67188e-18	1.48786e-16	scaf37	2840432	2847390	-	1038	-	-	-	-	-	-	-	101739669
BGIBMGA012504	58.9399	112.243	5.63707	0.0502222	-4.31553	1.8596e-18	1.64358e-16	scaf56	1793390	1806247	+	1167	-	GO:0004888;GO:0004888;GO:0005216;GO:0005216;GO:0005230;GO:0005230;GO:0005886;GO:0005886;GO:0006811;GO:0006811;GO:0006811;GO:0016020;GO:0016021;GO:0016021;GO:0016021;GO:0034220;GO:0034220;	-	-	-	-	-	-
BGIBMGA005788	132.473	226.059	38.8866	0.17202	-2.53935	3.13824e-18	2.71784e-16	scaf54	157357	157590	+	234	-	-	-	-	-	-	-	-
BGIBMGA014562	337.508	512.875	162.14	0.31614	-1.66137	4.98431e-18	4.23142e-16	scaf442	6464	12182	-	936	-	GO:0005267;GO:0005267;GO:0006811;GO:0016020;GO:0016020;GO:0016020;GO:0016021;GO:0016021;GO:0016021;GO:0071805;GO:0071805;	-	-	-	-	-	-
BGIBMGA003999	1049.26	1486.42	612.098	0.411792	-1.28001	5.1419e-18	4.33667e-16	scaf36	2975117	2986372	-	2028	-	GO:0003676;GO:0003676;	-	-	-	-	-	-
BGIBMGA008174	5606.53	8474.7	2738.35	0.323121	-1.62986	9.68528e-18	7.96044e-16	scaf52	1035138	1037822	+	816	-	-	-	-	-	-	-	-
BGIBMGA013642	459.77	761.731	157.809	0.207171	-2.2711	1.65313e-17	1.31679e-15	scaf78	1326051	1347024	+	1524	-	GO:0016020;GO:0016021;GO:0016021;GO:0016021;GO:0055085;GO:0055085;	-	-	-	-	-	-
BGIBMGA013021	44802	62360.5	27243.4	0.436869	-1.19473	2.89474e-17	2.29164e-15	scaf4	5085639	5098856	+	1095	-	GO:0003824;GO:0003824;GO:0004332;GO:0004332;GO:0004332;GO:0006096;GO:0006096;GO:0006096;GO:0016829;	K01623	EC:4.1.2.13	-	-	Fructose-bisphosphate aldolase[Source:UniProtKB/TrEMBL;Acc:Q1HPN7]	778467
BGIBMGA010256	382.396	571.032	193.759	0.339314	-1.55931	3.13192e-17	2.46429e-15	scaf15	3648176	3662611	+	1770	-	-	-	-	-	-	-	-
BGIBMGA010929	614.296	877.339	351.252	0.400361	-1.32063	4.72932e-17	3.56884e-15	scaf68	739663	747047	-	1293	-	GO:0003677;GO:0003677;GO:0005634;GO:0005634;GO:0006351;GO:0006351;GO:0006355;GO:0006355;GO:0006355;GO:0046983;GO:0046983;	-	-	-	-	-	-
BGIBMGA013421	1576.55	2137.59	1015.51	0.475074	-1.07378	5.20426e-17	3.88183e-15	scaf50	2459389	2460679	+	1164	-	GO:0003700;GO:0003700;GO:0006355;GO:0006355;	-	-	-	-	-	-
BGIBMGA006068	1482.31	2014.33	950.297	0.471768	-1.08385	5.41781e-17	4.0179e-15	scaf5	526938	527612	-	675	-	-	-	-	-	-	-	-
BGIBMGA013148	828.631	1154.26	503.007	0.435785	-1.19831	1.45711e-16	1.03881e-14	scaf124	505718	507272	+	1251	-	GO:0016740;GO:0017183;GO:0017183;GO:0017183;	-	-	-	-	Diphthamide biosynthesis protein 1[Source:UniProtKB/TrEMBL;Acc:H9JUD5]	-
BGIBMGA009263	524.659	795.339	253.979	0.319334	-1.64686	2.16768e-16	1.50385e-14	scaf38	907304	910597	+	3294	-	-	-	-	-	-	-	105842505
BGIBMGA007397	7014.24	10035	3993.47	0.397954	-1.32933	2.25492e-16	1.55602e-14	scaf55	780051	781377	+	645	-	GO:0005737;GO:0005737;GO:0009968;GO:0009968;	-	-	-	-	-	-
BGIBMGA004104	1453.09	1964.84	941.329	0.479086	-1.06164	2.63832e-16	1.8109e-14	scaf36	2048115	2056517	+	1056	-	GO:0003677;GO:0003677;GO:0005634;GO:0005634;	-	-	-	-	-	-
BGIBMGA010221	1285.14	1743.37	826.917	0.474322	-1.07606	2.97156e-16	2.02884e-14	scaf15	2480277	2503263	+	12657	-	GO:0003677;GO:0003700;GO:0003700;GO:0005515;GO:0005634;GO:0005634;GO:0005634;GO:0006351;GO:0006351;GO:0006355;GO:0006355;GO:0006355;GO:0008168;GO:0008168;GO:0008270;GO:0008270;GO:0016740;GO:0032259;GO:0043565;GO:0043565;GO:0046872;	-	-	-	-	-	-
BGIBMGA012235	567.605	810.027	325.182	0.401446	-1.31672	4.02393e-16	2.70442e-14	scaf26	3578054	3580180	-	1395	-	-	-	-	-	-	-	-
BGIBMGA011701	394.376	578.341	210.412	0.363819	-1.45871	8.57332e-16	5.58738e-14	scaf16	1179108	1186424	-	363	-	GO:0016020;GO:0016021;GO:0016021;	-	-	-	-	-	-
BGIBMGA011691	1377.97	2108.02	647.93	0.307365	-1.70198	1.00501e-15	6.45206e-14	scaf16	1365818	1373814	-	2826	-	GO:0004970;GO:0004970;GO:0005216;GO:0005216;GO:0005234;GO:0005886;GO:0006811;GO:0006811;GO:0006811;GO:0016020;GO:0016020;GO:0016020;GO:0016021;GO:0016021;GO:0030054;GO:0030054;GO:0034220;GO:0035235;GO:0038023;GO:0038023;GO:0045202;GO:0045211;GO:0045211;	-	-	-	-	-	-
BGIBMGA008543	944.042	1395.16	492.927	0.353313	-1.50098	1.30589e-15	8.30107e-14	scaf2	9344540	9345019	+	480	-	-	-	-	-	-	-	101744991
BGIBMGA003646	294.13	463.184	125.075	0.270033	-1.88879	1.50634e-15	9.43584e-14	scaf9	2481791	2505492	+	2919	-	GO:0005515;GO:0016020;GO:0016021;GO:0016021;	-	-	-	-	-	-
BGIBMGA006676	507.166	725.1	289.232	0.398885	-1.32596	1.6877e-15	1.04703e-13	scaf10	519122	521807	+	1347	-	GO:0004672;GO:0004672;GO:0005524;GO:0005524;GO:0006468;GO:0006468;	-	-	-	-	-	-
BGIBMGA006579	89.8809	157.595	22.1664	0.140654	-2.82978	1.90345e-15	1.17522e-13	scaf10	5326482	5333183	-	822	-	GO:0004888;GO:0004888;GO:0005216;GO:0005216;GO:0005230;GO:0005230;GO:0005886;GO:0005886;GO:0006811;GO:0006811;GO:0006811;GO:0016020;GO:0016021;GO:0016021;GO:0016021;GO:0034220;GO:0034220;	-	-	-	-	-	-
BGIBMGA008483	1356.61	1826.49	886.723	0.48548	-1.04252	2.03064e-15	1.24778e-13	scaf2	4481370	4484189	+	936	-	GO:0018024;GO:0018024;GO:0034968;	-	-	-	-	-	-
BGIBMGA003240	700.073	975.34	424.806	0.435547	-1.1991	2.23592e-15	1.36741e-13	scaf73	345638	347718	-	1290	-	-	-	-	-	-	-	-
BGIBMGA000200	1127.55	1523.56	731.536	0.480148	-1.05845	6.36483e-15	3.71637e-13	scaf163	335068	345136	+	1869	-	GO:0005515;GO:0016020;GO:0016021;GO:0016021;	-	-	-	-	-	-
BGIBMGA004745	528.11	750.749	305.471	0.406888	-1.2973	7.79633e-15	4.47817e-13	scaf57	1512237	1521808	-	612	-	GO:0005758;GO:0005758;	-	-	-	-	-	101740359
BGIBMGA012526	1044.08	1525.09	563.069	0.369203	-1.43751	7.84305e-15	4.47817e-13	scaf77	1554877	1562708	-	1317	-	GO:0003824;GO:0003824;GO:0008483;GO:0008483;GO:0030170;GO:0030170;	-	-	-	-	-	-
BGIBMGA008787	589.477	824.744	354.21	0.429479	-1.21934	9.10037e-15	5.15049e-13	scaf115	498366	503702	+	1527	-	GO:0003676;GO:0003676;	-	-	-	-	-	-
BGIBMGA008538	419.045	789.189	48.9012	0.0619639	-4.01243	1.00716e-14	5.65061e-13	scaf2	8825717	8840501	+	645	-	-	-	-	-	-	-	-
BGIBMGA002356	1067.41	1442.39	692.435	0.480061	-1.05871	1.11488e-14	6.2279e-13	scaf116	418669	419283	-	615	-	-	-	-	-	-	-	101741301
BGIBMGA003960	776.813	1068	485.624	0.454703	-1.137	1.19529e-14	6.6483e-13	scaf105	896463	905692	+	1680	-	GO:0008271;GO:0008271;GO:0008271;GO:0008272;GO:0008272;GO:0015116;GO:0015116;GO:0016020;GO:0016020;GO:0016020;GO:0016021;GO:0016021;GO:0016021;GO:0055085;GO:0055085;GO:1902358;	-	-	-	-	-	-
BGIBMGA004813	306.366	532.214	80.5184	0.151289	-2.72462	1.28029e-14	7.03015e-13	scaf46	1272178	1274713	-	162	-	-	-	-	-	-	-	-
BGIBMGA004790	194.766	303.838	85.6946	0.28204	-1.82603	1.4574e-14	7.86873e-13	scaf46	2663992	2681786	-	1038	-	GO:0000166;GO:0004672;GO:0004672;GO:0004674;GO:0004674;GO:0005524;GO:0005524;GO:0005524;GO:0006468;GO:0006468;	-	-	-	-	-	-
BGIBMGA002746	596.114	890.116	302.112	0.339408	-1.55891	1.59039e-14	8.55099e-13	scaf117	22570	24949	-	408	-	-	-	-	-	-	-	-
BGIBMGA010263	824.145	1128	520.291	0.461251	-1.11638	1.63265e-14	8.74178e-13	scaf15	4052020	4089174	+	4947	-	GO:0003677;GO:0003677;GO:0005634;GO:0005634;	-	-	-	-	-	-
BGIBMGA000688	20475.6	28934.6	12016.5	0.415299	-1.26778	1.65599e-14	8.83013e-13	scaf8	4647478	4655876	+	1284	-	GO:0016020;GO:0016021;GO:0016021;GO:0016021;GO:0055085;GO:0055085;	-	-	-	-	-	-
BGIBMGA013161	1208.63	1827.16	590.088	0.322953	-1.6306	1.83996e-14	9.61646e-13	scaf39	3034644	3036845	-	645	-	GO:0016491;GO:0016491;GO:0055114;	-	-	-	-	-	-
BGIBMGA001528	420.778	604.747	236.809	0.391583	-1.35261	1.84072e-14	9.61646e-13	scaf7	3087089	3091476	+	1998	-	-	-	-	-	-	-	-
BGIBMGA000591	83.1692	145.579	20.7599	0.142602	-2.80993	2.4671e-14	1.26331e-12	scaf8	878398	883160	-	3246	-	GO:0005515;	-	-	-	-	-	-
BGIBMGA009168	69.8261	129.278	10.3744	0.0802491	-3.63937	5.20788e-14	2.59469e-12	scaf96	1443573	1457855	+	2757	-	-	-	-	-	-	-	-
BGIBMGA001034	70.9028	126.863	14.9428	0.117788	-3.08574	5.38356e-14	2.6719e-12	scaf1	4170683	4171693	-	1011	-	-	-	-	-	-	-	101740370
BGIBMGA007432	354.741	521.518	187.964	0.360418	-1.47226	5.93736e-14	2.93547e-12	scaf55	2353318	2359901	+	498	-	-	-	-	-	-	-	-
BGIBMGA003791	166.103	262.365	69.841	0.266198	-1.90943	9.03896e-14	4.40146e-12	scaf91	839519	850971	+	867	-	GO:0016020;GO:0016021;GO:0016021;	K18264	-	-	-	-	101739397
BGIBMGA006324	353.263	510.775	195.75	0.38324	-1.38368	9.42456e-14	4.57197e-12	scaf49	1761614	1766927	+	720	-	GO:0004252;GO:0004252;GO:0006508;GO:0006508;	-	-	-	-	-	-
BGIBMGA014224	140.188	226.478	53.8974	0.23798	-2.07109	1.65781e-13	7.83605e-12	scaf80	1524763	1528391	-	1323	-	-	-	-	-	-	Yellow-f [Source:UniProtKB/TrEMBL;Acc:H9JXF8]"	101736658
BGIBMGA001272	469.421	660.885	277.957	0.420584	-1.24953	1.86043e-13	8.69817e-12	scaf1	12900308	12922336	+	2214	-	GO:0006508;GO:0006508;GO:0008236;GO:0008236;GO:0016020;GO:0016021;GO:0016021;	-	-	-	-	-	-
BGIBMGA000592	57.5536	105.082	10.0255	0.0954072	-3.38976	1.96388e-13	9.14872e-12	scaf8	876572	877930	-	1359	-	GO:0004177;GO:0004177;GO:0005622;GO:0005622;GO:0005737;GO:0005737;GO:0006508;GO:0006508;GO:0008235;GO:0008235;GO:0019538;GO:0019538;GO:0030145;GO:0030145;	-	-	-	-	-	-
BGIBMGA005980	5416.24	7734.59	3097.88	0.400523	-1.32004	2.2565e-13	1.04365e-11	scaf5	5763566	5772183	-	5085	-	GO:0003676;GO:0003676;	-	-	-	-	-	-
BGIBMGA002538	886.906	1195.66	578.149	0.483539	-1.0483	2.27735e-13	1.04953e-11	scaf14	5400662	5405806	+	501	-	GO:0006811;GO:0015078;GO:0015078;GO:0015991;GO:0015991;GO:0033179;GO:0033179;	-	-	-	-	-	-
BGIBMGA008857	494.616	734.204	255.027	0.347352	-1.52553	2.4356e-13	1.11847e-11	scaf17	5355320	5355886	-	267	-	-	-	-	-	-	-	-
BGIBMGA000237	998.626	1335.35	661.897	0.495672	-1.01254	3.37355e-13	1.52745e-11	scaf18	4689433	4719165	-	3057	-	-	-	-	-	-	-	-
BGIBMGA003800	304.665	483.746	125.584	0.259607	-1.9456	3.43733e-13	1.55089e-11	scaf91	1513613	1528201	+	1863	-	GO:0004383;GO:0004383;GO:0004672;GO:0004672;GO:0004713;GO:0004713;GO:0005524;GO:0005524;GO:0006182;GO:0006468;GO:0006468;GO:0016020;GO:0016021;GO:0016021;GO:0018108;	-	-	-	-	-	-
BGIBMGA001904	200.432	306.741	94.1226	0.306847	-1.70441	3.61309e-13	1.61326e-11	scaf28	746744	750782	-	840	-	-	-	-	-	-	-	101743244
BGIBMGA009881	785.716	1195.3	376.131	0.314674	-1.66807	3.65565e-13	1.62664e-11	scaf51	664194	691500	+	3420	-	GO:0003779;GO:0003779;GO:0016043;GO:0016043;GO:0017048;GO:0017048;GO:0030036;GO:0030036;	-	-	-	-	-	-
BGIBMGA013535	903.245	1209.5	596.994	0.493589	-1.01862	4.40622e-13	1.94054e-11	scaf101	937233	951658	+	1758	-	-	-	-	-	-	-	-
BGIBMGA003998	419.255	593.802	244.708	0.412103	-1.27892	4.67934e-13	2.05381e-11	scaf36	3069071	3070360	-	993	-	-	-	-	-	-	-	-
BGIBMGA012314	234.85	395.302	74.3984	0.188206	-2.40961	5.7356e-13	2.48363e-11	scaf26	621386	623193	+	1200	-	GO:0003676;GO:0003676;	-	-	-	-	-	101744006
BGIBMGA014360	228.794	361.519	96.069	0.265737	-1.91193	6.16895e-13	2.64364e-11	scaf138	4319	5799	+	516	IRP1	GO:0002376;GO:0003674;GO:0005576;GO:0005576;GO:0042742;GO:0042742;GO:0042832;GO:0042832;GO:0045087;GO:0045087;	-	-	-	-	Putative defense protein [Source:UniProtKB/Swiss-Prot;Acc:Q008X1]	778525
BGIBMGA012336	2180.48	3448.26	912.69	0.264681	-1.91767	9.12793e-13	3.79957e-11	scaf26	2276001	2284775	+	996	LDH	GO:0003824;GO:0003824;GO:0004459;GO:0004459;GO:0004459;GO:0005737;GO:0005737;GO:0005975;GO:0005975;GO:0016491;GO:0016491;GO:0016491;GO:0016616;GO:0016616;GO:0019752;GO:0019752;GO:0055114;GO:0055114;GO:0055114;	K00016	EC:1.1.1.27	-	-	L-lactate dehydrogenase[Source:UniProtKB/TrEMBL;Acc:A7LBQ0]	100124423
BGIBMGA010073	76.1328	145.931	6.33482	0.0434098	-4.52584	1.05631e-12	4.35485e-11	scaf45	1383931	1384780	+	294	-	-	-	-	-	-	-	-
BGIBMGA008105	686.702	931.629	441.774	0.474195	-1.07645	1.12534e-12	4.62464e-11	scaf87	353983	359856	-	1932	-	GO:0005515;	-	-	-	-	-	-
BGIBMGA001807	93.5109	156.754	30.2676	0.19309	-2.37266	1.70964e-12	6.8513e-11	scaf35	3057554	3065764	+	1242	-	GO:0004222;GO:0004222;GO:0006508;GO:0006508;GO:0008237;GO:0008237;	-	-	-	-	-	-
BGIBMGA001613	367.894	523.226	212.562	0.406253	-1.29955	2.55032e-12	1.00333e-10	scaf35	3904904	3910983	-	1137	BMO.9491	GO:0005975;GO:0006012;GO:0006012;GO:0006012;GO:0008108;GO:0008108;GO:0008108;GO:0008270;GO:0008270;GO:0016740;GO:0016779;GO:0033499;GO:0033499;GO:0046872;	-	-	-	-	Galactose-1-phosphate uridylyltransferase[Source:UniProtKB/TrEMBL;Acc:H9IWI1]	-
BGIBMGA011982	2052.6	2877.17	1228.03	0.426818	-1.22831	3.31314e-12	1.28773e-10	scaf59	1392001	1431668	+	12990	-	GO:0005509;GO:0005509;GO:0005515;GO:0016020;GO:0016021;GO:0016021;	-	-	-	-	-	-
BGIBMGA006338	422.314	594.578	250.051	0.420552	-1.24964	3.47419e-12	1.33425e-10	scaf49	2347163	2374400	+	4497	-	-	-	-	-	-	-	-
BGIBMGA000538	2683.66	4480.88	886.437	0.197826	-2.33769	3.76351e-12	1.44108e-10	scaf8	4633938	4636953	-	1380	-	GO:0016020;GO:0016021;GO:0016021;GO:0016021;GO:0055085;GO:0055085;	-	-	-	-	-	-
BGIBMGA003093	246.549	363.812	129.286	0.355363	-1.49263	4.07345e-12	1.55055e-10	scaf13	1500441	1508008	+	1137	-	GO:0003779;GO:0003779;GO:0016192;GO:0016192;GO:0045010;GO:0045010;GO:0046872;GO:0046872;	-	-	-	-	-	-
BGIBMGA005589	384.679	542.429	226.93	0.418359	-1.25719	4.53537e-12	1.70625e-10	scaf33	862733	872244	-	3351	-	GO:0003676;GO:0003676;GO:0035278;GO:0035278;	-	-	-	-	-	-
BGIBMGA011370	841.712	1124.61	558.816	0.496899	-1.00898	4.85609e-12	1.8216e-10	scaf12	3575267	3596864	+	4122	-	GO:0000166;GO:0004672;GO:0004672;GO:0004674;GO:0004674;GO:0005524;GO:0005524;GO:0005524;GO:0006468;GO:0006468;GO:0016301;GO:0016310;GO:0016740;	-	-	-	-	-	-
BGIBMGA003684	143.35	224.038	62.6615	0.279692	-1.83809	5.73326e-12	2.13205e-10	scaf9	4150961	4155043	+	1566	-	GO:0004359;GO:0004359;GO:0005515;GO:0006541;GO:0006541;	-	-	-	-	-	-
BGIBMGA013452	53.3477	96.13	10.5654	0.109907	-3.18564	6.00277e-12	2.22585e-10	scaf111	84851	93107	-	912	-	GO:0005515;	-	-	-	-	-	-
BGIBMGA003011	741.102	997.231	484.974	0.486321	-1.04002	6.14899e-12	2.26059e-10	scaf13	4151500	4159796	-	2142	-	GO:0005085;GO:0005085;GO:0005085;GO:0005622;GO:0005622;GO:0007165;GO:0007165;GO:0007264;GO:0007264;	K17635	-	-	-	-	101747001
BGIBMGA006787	848.348	1274.76	421.934	0.33099	-1.59514	6.43242e-12	2.35807e-10	scaf10	6969461	6969836	+	267	-	-	-	-	-	-	-	-
BGIBMGA003123	456.817	655.131	258.503	0.394582	-1.3416	6.93179e-12	2.53393e-10	scaf13	3106441	3116296	+	831	-	-	-	-	-	-	-	-
BGIBMGA010681	164.403	258.852	69.9548	0.27025	-1.88763	1.06897e-11	3.82104e-10	scaf84	1412149	1418779	+	1062	-	GO:0006629;GO:0006629;GO:0006633;GO:0006633;GO:0016020;GO:0016021;GO:0016021;GO:0016491;GO:0016717;GO:0016717;GO:0055114;GO:0055114;GO:0055114;	K00507	EC:1.14.19.1	-	-	-	692568
BGIBMGA011449	125.713	203.042	48.3834	0.238292	-2.0692	1.07565e-11	3.82376e-10	scaf22	3399966	3407139	-	1410	-	-	-	-	-	-	-	-
BGIBMGA008245	690.014	1006.39	373.641	0.371269	-1.42946	1.09047e-11	3.86578e-10	scaf94	557880	558541	-	264	-	GO:0005198;GO:0005198;GO:0031012;GO:0031012;	-	-	-	-	-	-
BGIBMGA009825	187.754	283.4	92.1084	0.325012	-1.62144	1.11257e-11	3.93331e-10	scaf51	2582891	2586037	-	1074	-	GO:0005515;	-	-	-	-	-	-
BGIBMGA005854	826.659	1126.29	527.03	0.467935	-1.09562	1.18651e-11	4.17187e-10	scaf125	5279	14755	-	1998	-	GO:0005515;GO:0016020;GO:0016021;GO:0016021;	-	-	-	-	-	-
BGIBMGA006268	656.585	878.846	434.325	0.494199	-1.01684	2.15013e-11	7.41853e-10	scaf49	1960237	1963563	-	495	-	-	-	-	-	-	-	-
BGIBMGA012721	38.9352	72.7622	5.10825	0.0702048	-3.83229	2.28279e-11	7.83434e-10	scaf93	1452803	1459827	-	714	-	GO:0005634;GO:0005634;GO:0006355;GO:0006355;	-	-	-	-	-	-
BGIBMGA010961	532.338	1009.35	55.326	0.0548135	-4.18933	2.31509e-11	7.92411e-10	scaf83	1374978	1376447	-	264	-	-	-	-	-	-	-	-
BGIBMGA008072	726.851	969.877	483.825	0.498852	-1.00332	2.3355e-11	7.97283e-10	scaf41	1380811	1389272	+	963	-	GO:0004089;GO:0004089;GO:0008270;GO:0008270;	K01672	EC:4.2.1.1	-	-	-	101738069
BGIBMGA002675	9138.78	12283.4	5994.17	0.48799	-1.03508	2.68451e-11	9.04461e-10	scaf20	1872887	1874998	+	2112	-	GO:0005515;GO:0016020;GO:0016021;GO:0016021;	-	-	-	-	-	-
BGIBMGA001346	408.329	625.433	191.225	0.305749	-1.70958	2.99243e-11	9.97785e-10	scaf118	667763	676842	-	4875	-	-	-	-	-	-	-	-
BGIBMGA001926	59435.5	79396.5	39474.6	0.497183	-1.00815	3.01595e-11	1.00304e-09	scaf28	1403825	1413600	+	1284	-	GO:0004161;GO:0004337;GO:0008299;GO:0008299;GO:0016740;GO:0016740;GO:0033384;GO:0045337;	-	-	-	-	-	-
BGIBMGA013380	4173.08	5613.68	2732.48	0.486754	-1.03874	3.04144e-11	1.00633e-09	scaf50	2491067	2517157	-	10671	-	-	-	-	-	-	-	-
BGIBMGA006425	221.092	323.735	118.448	0.365881	-1.45055	3.77831e-11	1.22194e-09	scaf11	921672	925194	-	471	-	GO:0005515;	-	-	-	-	-	-
BGIBMGA005063	1135.52	1517.23	753.817	0.496837	-1.00916	3.87436e-11	1.24675e-09	scaf32	2287331	2296582	-	909	-	GO:0008063;GO:0008063;	-	-	-	-	-	-
BGIBMGA006799	68.3887	130.443	6.33482	0.0485641	-4.36397	4.06782e-11	1.30251e-09	scaf70	1905474	1945501	-	3333	-	GO:0000166;GO:0004383;GO:0004383;GO:0004672;GO:0004672;GO:0005524;GO:0005524;GO:0005622;GO:0005622;GO:0006182;GO:0006468;GO:0006468;GO:0009190;GO:0009190;GO:0016020;GO:0016021;GO:0016021;GO:0016829;GO:0016849;GO:0016849;GO:0035556;GO:0035556;	-	-	-	-	-	-
BGIBMGA009656	383.143	532.571	233.715	0.438843	-1.18822	4.66875e-11	1.48388e-09	scaf27	3477032	3478681	-	1650	-	GO:0008270;GO:0008270;	-	-	-	-	-	101738020
BGIBMGA005722	245.922	356.989	134.855	0.377755	-1.40448	4.68596e-11	1.48569e-09	scaf120	155390	180523	+	2259	-	GO:0004222;GO:0004222;GO:0006508;GO:0006508;GO:0007218;GO:0007218;GO:0008237;GO:0008237;	-	-	-	-	-	-
BGIBMGA006442	380.647	528.704	232.589	0.439923	-1.18468	5.33515e-11	1.67914e-09	scaf11	449668	457426	-	1233	-	GO:0003676;GO:0003676;GO:0003677;GO:0003677;	-	-	-	-	-	-
BGIBMGA005212	748.057	1219.08	277.034	0.227248	-2.13766	6.56468e-11	2.05111e-09	scaf119	549276	550566	+	1110	-	-	-	-	-	-	-	-
BGIBMGA003349	106.736	171.334	42.1385	0.245943	-2.0236	6.99248e-11	2.17424e-09	scaf42	1014613	1018676	-	1722	-	GO:0003676;GO:0003676;GO:0005615;GO:0005615;GO:0008168;GO:0008168;GO:0032259;GO:0032259;	-	-	-	-	-	-
BGIBMGA007046	578.414	876.284	280.543	0.32015	-1.64318	7.09267e-11	2.19482e-09	scaf21	538858	543585	-	1380	-	GO:0004252;GO:0004252;GO:0006508;GO:0006508;GO:0006508;GO:0008233;GO:0008236;GO:0016787;	-	-	-	-	-	-
BGIBMGA000891	64.141	110.954	17.328	0.156173	-2.67878	8.10622e-11	2.49054e-09	scaf1	11339969	11352405	-	1620	-	GO:0004888;GO:0004888;GO:0005216;GO:0005216;GO:0005230;GO:0005230;GO:0005886;GO:0005886;GO:0006811;GO:0006811;GO:0006811;GO:0016020;GO:0016021;GO:0016021;GO:0016021;GO:0034220;GO:0034220;	-	-	-	-	-	-
BGIBMGA003049	476.806	650.55	303.062	0.465855	-1.10205	8.22096e-11	2.51382e-09	scaf13	2460839	2475391	-	2265	GPD	GO:0004368;GO:0004368;GO:0004368;GO:0005509;GO:0005509;GO:0006072;GO:0006072;GO:0006072;GO:0009331;GO:0009331;GO:0009331;GO:0016491;GO:0016491;GO:0016491;GO:0052590;GO:0052591;GO:0052591;GO:0055114;GO:0055114;GO:0055114;	K00111	EC:1.1.5.3	-	-	Glycerol-3-phosphate dehydrogenase[Source:UniProtKB/TrEMBL;Acc:B0EVL7]	100037430
BGIBMGA005852	505.016	686.109	323.923	0.472116	-1.08279	8.28131e-11	2.52629e-09	scaf125	47362	49893	-	534	-	GO:0005737;GO:0005737;GO:0042325;GO:0042325;	-	-	-	-	-	-
BGIBMGA004418	132.661	206.475	58.8478	0.285011	-1.81091	8.5263e-11	2.58879e-09	scaf37	747756	748316	-	561	-	-	-	-	-	-	-	-
BGIBMGA011860	62.0065	107.293	16.7203	0.155838	-2.68188	9.39736e-11	2.84656e-09	scaf16	4572611	4580420	+	759	-	-	K00069	EC:1.1.1.141	-	-	-	101742233
BGIBMGA005170	129.679	202.446	56.9124	0.281124	-1.83072	9.5226e-11	2.87102e-09	scaf32	4186077	4195039	+	2241	-	GO:0005216;GO:0005216;GO:0005515;GO:0006811;GO:0006811;GO:0006811;GO:0016020;GO:0016020;GO:0016020;GO:0016021;GO:0016021;GO:0034220;GO:0055085;GO:0055085;	-	-	-	-	-	-
BGIBMGA013617	143.533	221.556	65.5094	0.295679	-1.75789	1.16388e-10	3.46853e-09	scaf78	483939	488725	+	690	-	GO:0016020;GO:0016021;GO:0016021;	-	-	-	-	-	-
BGIBMGA011612	225.209	327.885	122.534	0.37371	-1.42001	1.34235e-10	3.97285e-09	scaf16	5497538	5498367	-	765	-	-	-	-	-	-	-	-
BGIBMGA000146	734.036	983.047	485.025	0.49339	-1.0192	1.38227e-10	4.07234e-09	scaf43	2072799	2085395	+	1605	-	GO:0005622;GO:0005622;GO:0035556;GO:0035556;GO:0046872;GO:0046872;	-	-	-	-	-	-
BGIBMGA012374	59.7161	111.781	7.65137	0.0684498	-3.86881	1.38739e-10	4.07812e-09	scaf82	1112929	1120958	-	1725	-	GO:0016614;GO:0016614;GO:0050660;GO:0050660;GO:0055114;GO:0055114;	-	-	-	-	-	-
BGIBMGA003041	286.833	480.758	92.9071	0.193251	-2.37145	2.10819e-10	5.99209e-09	scaf13	2784853	2790408	-	2988	-	GO:0006355;GO:0006355;	-	-	-	-	-	-
BGIBMGA010251	12477.7	17560.2	7395.24	0.421137	-1.24764	2.12178e-10	6.009e-09	scaf15	3397188	3402331	+	738	-	GO:0005737;GO:0005737;GO:0006914;GO:0006914;GO:0006914;	-	-	-	-	-	-
BGIBMGA007987	123.91	192.574	55.247	0.286888	-1.80144	3.09921e-10	8.56364e-09	scaf41	3540320	3543929	-	588	-	GO:0002376;GO:0008270;GO:0008270;GO:0008745;GO:0008745;GO:0009253;GO:0009253;GO:0042834;GO:0042834;GO:0045087;GO:0045087;GO:0045087;	-	-	-	-	-	-
BGIBMGA010235	110.321	174.914	45.7283	0.261433	-1.93549	3.32859e-10	9.15823e-09	scaf15	2854372	2864321	+	2406	-	-	-	-	-	-	-	-
BGIBMGA009278	1033.42	1379.49	687.349	0.498262	-1.00502	4.25317e-10	1.15059e-08	scaf38	1815365	1815565	+	201	-	-	-	-	-	-	-	-
BGIBMGA003091	129.885	200.303	59.4666	0.296882	-1.75204	4.38591e-10	1.18154e-08	scaf13	1448495	1452692	+	618	-	GO:0003779;GO:0003779;GO:0016192;GO:0016192;GO:0045010;GO:0045010;	-	-	-	-	-	-
BGIBMGA004346	358.716	494.283	223.149	0.45146	-1.14733	5.38366e-10	1.43832e-08	scaf263	49816	50867	-	456	-	-	-	-	-	-	-	-
BGIBMGA006552	4140.62	5595.91	2685.33	0.479874	-1.05927	5.77061e-10	1.52278e-08	scaf10	6716922	6727114	-	2055	-	GO:0004672;GO:0004672;GO:0005524;GO:0005524;GO:0006468;GO:0006468;	-	-	-	-	-	-
BGIBMGA004955	350.867	507.425	194.308	0.38293	-1.38485	5.94203e-10	1.56481e-08	scaf65	14157	25964	-	1611	-	GO:0005615;GO:0005615;GO:0016020;GO:0016020;GO:0016020;GO:0016021;GO:0016021;GO:0030001;GO:0030001;GO:0046873;GO:0046873;GO:0055085;GO:0055085;	-	-	-	-	-	-
BGIBMGA011277	338.733	466.684	210.783	0.45166	-1.14669	8.11073e-10	2.11864e-08	scaf12	1856161	1908680	-	10212	-	-	-	-	-	-	-	-
BGIBMGA000228	294.433	411.254	177.612	0.431879	-1.2113	8.27645e-10	2.15756e-08	scaf18	5224396	5230397	-	4482	-	-	-	-	-	-	-	-
BGIBMGA004981	132.649	202.107	63.1903	0.312658	-1.67734	8.32373e-10	2.16551e-08	scaf65	952104	954337	+	2160	-	GO:0005515;	-	-	-	-	-	-
BGIBMGA011320	57.0804	98.5992	15.5616	0.157827	-2.66358	1.14497e-09	2.90841e-08	scaf12	1517283	1522090	+	1515	-	GO:0005515;GO:0016020;GO:0016021;GO:0016021;	-	-	-	-	-	101746016
BGIBMGA001944	396.299	551.83	240.769	0.436311	-1.19657	1.23293e-09	3.12569e-08	scaf28	2437585	2444466	+	987	-	GO:0016020;GO:0016021;GO:0016021;	-	-	-	-	-	-
BGIBMGA007911	427.246	576.254	278.238	0.48284	-1.05038	1.35313e-09	3.39703e-08	scaf3	6253212	6268517	+	3018	-	GO:0045216;GO:0045216;	-	-	-	-	-	-
BGIBMGA001583	417.534	565.132	269.935	0.477649	-1.06598	1.39435e-09	3.48695e-08	scaf7	6873483	6874217	+	735	-	-	-	-	-	-	-	-
BGIBMGA007607	499.875	668.355	331.394	0.495835	-1.01207	1.4068e-09	3.51128e-08	scaf3	9553683	9566256	-	1821	-	GO:0005509;GO:0005509;	-	-	-	-	-	-
BGIBMGA008961	169.454	251.501	87.4059	0.347537	-1.52476	1.44514e-09	3.59308e-08	scaf17	1497293	1499543	+	624	-	GO:0003676;GO:0003676;GO:0003677;GO:0003677;	-	-	-	-	-	101741784
BGIBMGA010812	46.5015	82.9884	10.0145	0.120674	-3.05081	1.47349e-09	3.65653e-08	scaf25	2601494	2604918	+	1524	-	GO:0004553;GO:0004553;GO:0005975;GO:0005975;	-	-	-	-	-	-
BGIBMGA002187	463.046	732.829	193.264	0.263723	-1.92291	1.48778e-09	3.67783e-08	scaf64	1677927	1683316	+	771	NANOSO	GO:0003723;GO:0003723;GO:0003723;GO:0006417;GO:0006417;GO:0008270;GO:0008270;	K18741	-	-	-	Zinc finger protein NANOS-O[Source:UniProtKB/TrEMBL;Acc:A5LI39]	100101221
BGIBMGA012693	368.991	503.952	234.03	0.46439	-1.10659	1.94669e-09	4.76663e-08	scaf69	455101	457928	+	1971	-	GO:0006357;	-	-	-	-	-	-
BGIBMGA011454	359.375	490.932	227.819	0.464054	-1.10764	2.04626e-09	4.99149e-08	scaf22	2861657	2868687	-	3036	-	GO:0005515;	-	-	-	-	-	-
BGIBMGA007610	226.766	322.705	130.826	0.405404	-1.30257	2.0892e-09	5.07703e-08	scaf3	9524922	9527026	-	558	-	GO:0005509;GO:0005509;GO:0016020;GO:0016021;GO:0016021;	-	-	-	-	-	-
BGIBMGA005775	852.904	1148.41	557.397	0.485363	-1.04286	2.26076e-09	5.45287e-08	scaf54	287481	293984	-	1503	-	GO:0003700;GO:0003700;GO:0006357;GO:0006357;	-	-	-	-	-	-
BGIBMGA010994	139.524	210.434	68.6144	0.326061	-1.61679	2.40165e-09	5.74971e-08	scaf83	671131	671628	+	390	-	GO:0016020;GO:0016021;GO:0016021;	-	-	-	-	-	-
BGIBMGA010521	159.153	235.064	83.2414	0.354123	-1.49768	2.73893e-09	6.48498e-08	scaf6	1998552	2009556	+	1560	-	GO:0004114;GO:0004114;GO:0005515;GO:0007165;GO:0007165;	-	-	-	-	-	-
BGIBMGA006856	4241.08	5744.93	2737.23	0.47646	-1.06957	3.165e-09	7.38539e-08	scaf70	734157	825505	+	56262	-	GO:0003700;GO:0003700;GO:0005509;GO:0005509;GO:0005576;GO:0005576;GO:0005634;GO:0005634;GO:0006355;GO:0006355;GO:0008270;GO:0008270;GO:0010466;GO:0016020;GO:0016021;GO:0016021;GO:0030414;GO:0030414;	-	-	-	-	Notch-like protein[Source:UniProtKB/TrEMBL;Acc:Q2F5X6]	-
BGIBMGA002265	200.563	288.066	113.059	0.392476	-1.34932	3.20207e-09	7.4584e-08	scaf34	1475950	1481391	-	519	-	GO:0003779;GO:0003779;GO:0007010;GO:0007010;	-	-	-	-	-	-
BGIBMGA001770	4349.19	5839.25	2859.14	0.489641	-1.0302	3.47834e-09	8.05825e-08	scaf35	1841343	1854789	+	4512	-	-	-	-	-	-	-	-
BGIBMGA004130	55.3745	94.5575	16.1914	0.171234	-2.54596	4.08529e-09	9.33037e-08	scaf36	3387161	3391804	+	1071	-	GO:0016491;GO:0016491;GO:0055114;GO:0055114;	-	-	-	-	-	101742189
BGIBMGA006226	319.743	438.582	200.904	0.458076	-1.12634	4.41992e-09	1.00413e-07	scaf5	8446688	8453069	+	2025	-	-	-	-	-	-	-	-
BGIBMGA006227	443.186	591.986	294.386	0.497285	-1.00786	5.1394e-09	1.15538e-07	scaf5	8464712	8472336	+	1371	-	-	-	-	-	-	-	-
BGIBMGA000895	53.4942	94.1498	12.8386	0.136363	-2.87447	5.37142e-09	1.20335e-07	scaf1	11143401	11149906	-	2121	-	-	-	-	-	-	-	-
BGIBMGA013427	108.139	179.416	36.8613	0.205451	-2.28313	5.40843e-09	1.20745e-07	scaf50	2680493	2737063	+	16398	-	GO:0005515;GO:0007165;GO:0007165;	-	-	-	-	-	-
BGIBMGA005091	49.7435	86.3786	13.1085	0.151756	-2.72017	5.62748e-09	1.25418e-07	scaf32	414961	444746	-	1677	-	GO:0004252;GO:0004252;GO:0006508;GO:0006508;	-	-	-	-	-	-
BGIBMGA001859	95.6336	149.905	41.3618	0.275919	-1.85768	6.14616e-09	1.36272e-07	scaf28	3008256	3091445	-	12462	-	GO:0003777;GO:0003777;GO:0005524;GO:0005524;GO:0007018;GO:0007018;GO:0016887;GO:0016887;GO:0030286;GO:0030286;	-	-	-	-	-	-
BGIBMGA000145	282.132	393.976	170.287	0.432228	-1.21014	6.35533e-09	1.40187e-07	scaf43	2045801	2046564	+	630	-	GO:0016020;GO:0016021;GO:0016021;	-	-	-	-	-	-
BGIBMGA013539	79.0797	143.993	14.1661	0.0983806	-3.34548	7.69074e-09	1.67073e-07	scaf101	1210436	1212800	+	411	-	GO:0046983;GO:0046983;	K09091	-	-	-	-	105841640
BGIBMGA001498	74.2094	120.705	27.7135	0.229596	-2.12283	8.23554e-09	1.78308e-07	scaf7	642053	658676	+	1671	-	GO:0005215;GO:0005215;GO:0016020;GO:0016021;GO:0016021;GO:0016021;GO:0055085;GO:0055085;	K06258	-	-	-	-	101745246
BGIBMGA006926	333.521	454.177	212.865	0.468682	-1.09332	8.26362e-09	1.78616e-07	scaf44	205382	214886	-	1848	-	GO:0005929;GO:0005929;GO:0015631;GO:0015631;GO:0030992;GO:0030992;GO:0042073;GO:0042073;GO:0060271;GO:0060271;	-	-	-	-	-	-
BGIBMGA004334	778.856	1096.68	461.038	0.420396	-1.25018	8.39129e-09	1.8077e-07	scaf79	1025725	1035416	+	1329	-	-	-	-	-	-	-	-
BGIBMGA002264	287.75	395.941	179.558	0.453498	-1.14083	8.53226e-09	1.83501e-07	scaf34	1485780	1489947	-	654	-	-	-	-	-	-	-	-
BGIBMGA010362	228.491	320.969	136.013	0.423758	-1.23869	9.86302e-09	2.0933e-07	scaf6	8035456	8040341	-	1755	-	-	-	-	-	-	-	-
BGIBMGA002876	292.239	448.982	135.495	0.301784	-1.72841	1.07627e-08	2.26561e-07	scaf30	1263115	1279868	+	1461	-	GO:0004222;GO:0004222;GO:0006508;GO:0006508;GO:0008237;GO:0008237;GO:0016020;GO:0016021;GO:0016021;GO:0046872;	-	-	-	-	-	-
BGIBMGA000030	80.0552	131.339	28.7711	0.21906	-2.1906	1.11787e-08	2.34554e-07	scaf98	47871	59327	-	1524	-	GO:0005509;GO:0005509;GO:0016012;GO:0016012;GO:0016020;GO:0016020;GO:0016020;GO:0016021;GO:0016021;	-	-	-	-	-	-
BGIBMGA008854	1375.51	2058.51	692.516	0.336415	-1.57168	1.16889e-08	2.44462e-07	scaf17	5443261	5443752	-	492	-	-	-	-	-	-	-	-
BGIBMGA008978	60.4665	100.511	20.422	0.203182	-2.29916	1.40495e-08	2.89147e-07	scaf17	2264842	2267542	+	1119	-	GO:0005576;GO:0005576;GO:0005737;GO:0005737;	-	-	-	-	Putative neuropeptide precursor protein[Source:UniProtKB/Swiss-Prot;Acc:B9WZ56]	100301494
BGIBMGA008419	77.807	124.368	31.2463	0.251241	-1.99286	1.5222e-08	3.11785e-07	scaf2	682499	685542	+	339	-	GO:0016020;GO:0016021;GO:0016021;	-	-	-	-	-	-
BGIBMGA001708	203.489	288.935	118.044	0.408551	-1.29141	1.55359e-08	3.17711e-07	scaf35	129274	132481	-	987	-	-	-	-	-	-	-	101739385
BGIBMGA002467	67.7219	110.262	25.1814	0.228377	-2.13051	1.59642e-08	3.25438e-07	scaf14	1260394	1268844	+	741	-	-	-	-	-	-	-	-
BGIBMGA011603	632.746	887.633	377.86	0.425695	-1.23211	1.99211e-08	4.02918e-07	scaf16	6156650	6174686	-	3345	-	GO:0000166;GO:0005524;GO:0005524;GO:0016301;GO:0016307;GO:0016307;GO:0016307;GO:0016310;GO:0016740;GO:0046488;GO:0046488;GO:0046488;GO:0046854;	-	-	-	-	-	-
BGIBMGA013816	3761.86	5650.11	1873.61	0.331606	-1.59246	2.56263e-08	5.07959e-07	scaf62	1964828	1974180	-	1116	-	-	K18201	EC:2.7.1.81	-	-	-	101742724
BGIBMGA006367	2425.41	3367.63	1483.2	0.440428	-1.18302	3.40982e-08	6.62655e-07	scaf11	4861283	4914515	-	9072	-	-	-	-	-	-	-	-
BGIBMGA000493	277.035	378.786	175.284	0.462751	-1.11169	4.31592e-08	8.20215e-07	scaf8	6869897	6871487	-	606	-	-	-	-	-	-	-	101736369
BGIBMGA013794	108.57	164.796	52.344	0.317629	-1.65459	4.48607e-08	8.51299e-07	scaf47	1846803	1883194	+	3156	-	GO:0005515;	-	-	-	-	-	-
BGIBMGA012401	304.437	411.279	197.595	0.48044	-1.05757	4.73236e-08	8.94091e-07	scaf190	77994	79968	-	504	-	GO:0005096;	-	-	-	-	-	-
BGIBMGA004535	418.013	683.407	152.62	0.223322	-2.1628	5.05581e-08	9.48457e-07	scaf97	1035659	1036427	+	186	-	-	-	-	-	-	-	-
BGIBMGA002877	913.491	1358.29	468.696	0.345064	-1.53506	5.05606e-08	9.48457e-07	scaf30	1284023	1287751	+	837	-	-	-	-	-	-	-	-
BGIBMGA003882	687.742	1042.05	333.438	0.319984	-1.64393	5.13666e-08	9.60629e-07	scaf72	100930	104692	+	1380	-	GO:0016020;GO:0016021;GO:0016021;	K14209	-	-	-	-	101741858
BGIBMGA003213	117.709	175.851	59.5675	0.338739	-1.56175	5.54829e-08	1.03312e-06	scaf73	1895671	1901107	-	4902	-	-	-	-	-	-	-	-
BGIBMGA010757	535.847	748.752	322.942	0.431307	-1.21321	6.27473e-08	1.15177e-06	scaf25	912618	926854	-	2004	-	-	-	-	-	-	-	101746596
BGIBMGA014253	43.2233	74.2948	12.1518	0.163563	-2.61209	7.43341e-08	1.34343e-06	scaf80	123643	127493	-	528	-	-	-	-	-	-	-	-
BGIBMGA002148	91.4075	156.238	26.5769	0.170105	-2.5555	7.81339e-08	1.40033e-06	scaf23	4589526	4616211	+	9339	-	GO:0003777;GO:0003777;GO:0005524;GO:0005524;GO:0007018;GO:0007018;GO:0016887;GO:0016887;GO:0030286;GO:0030286;	K10408	-	-	-	-	101738460
BGIBMGA003658	232.646	322.581	142.71	0.4424	-1.17658	9.93308e-08	1.75584e-06	scaf9	2992189	2994985	+	1011	-	GO:0016491;GO:0016491;GO:0055114;	K00078	-	-	-	-	101744141
BGIBMGA001958	62.4463	101.758	23.134	0.227343	-2.13706	1.06244e-07	1.87035e-06	scaf28	2976517	2977584	+	873	CPG31	-	-	-	-	-	Putative cuticle protein CPG31[Source:UniProtKB/TrEMBL;Acc:D0VEM6]	101738773
BGIBMGA003239	197.308	275.941	118.674	0.430071	-1.21735	1.13594e-07	1.98083e-06	scaf73	352653	355973	-	429	-	-	-	-	-	-	-	-
BGIBMGA006306	85.7123	132.437	38.9876	0.294386	-1.76422	1.21676e-07	2.11604e-06	scaf49	944974	954022	+	3345	-	GO:0005576;GO:0005576;GO:0005615;GO:0005615;	-	-	-	-	-	-
BGIBMGA011644	42.7128	73.9826	11.4431	0.154673	-2.69271	1.34249e-07	2.31907e-06	scaf16	3329045	3336828	-	3030	-	GO:0060271;GO:0060271;GO:0090162;GO:0090162;GO:0097539;GO:0097539;	-	-	-	-	-	-
BGIBMGA010963	19.8891	38.1917	1.58646	0.0415394	-4.58938	1.40665e-07	2.41697e-06	scaf83	1249402	1253591	-	1002	-	-	-	-	-	-	-	101745759
BGIBMGA011702	690.386	1053.5	327.275	0.310656	-1.68661	1.63245e-07	2.77537e-06	scaf16	1158684	1169081	-	714	-	-	-	-	-	-	-	-
BGIBMGA010375	105.362	157.839	52.8838	0.335049	-1.57756	1.81838e-07	3.05924e-06	scaf6	7380581	7380820	-	240	-	-	-	-	-	-	-	-
BGIBMGA005140	1091.5	1467.55	715.448	0.48751	-1.0365	1.91258e-07	3.19688e-06	scaf32	2441242	2445918	+	1143	-	GO:0003677;GO:0003677;GO:0003677;GO:0003700;GO:0003700;GO:0006355;GO:0006355;GO:0006357;GO:0006357;	K09031	-	-	-	-	101743155
BGIBMGA004110	232.517	366.783	98.2504	0.26787	-1.90039	2.03751e-07	3.37434e-06	scaf36	2446016	2452925	+	1014	-	GO:0005622;GO:0005622;GO:0009190;GO:0009190;GO:0016849;GO:0016849;GO:0035556;GO:0035556;	-	-	-	-	-	-
BGIBMGA010410	72.2299	114.833	29.6268	0.257999	-1.95456	2.03966e-07	3.37434e-06	scaf6	4584829	4593398	-	735	-	-	-	-	-	-	-	-
BGIBMGA001563	22.1477	41.9212	2.37418	0.0566344	-4.14218	2.2133e-07	3.6429e-06	scaf7	5539475	5542116	+	453	-	-	-	-	-	-	-	-
BGIBMGA005595	252.6	344.173	161.028	0.467869	-1.09582	2.25506e-07	3.70691e-06	scaf33	35315	36916	-	1065	-	-	-	-	-	-	-	-
BGIBMGA011742	469.748	660.637	278.859	0.422106	-1.24432	2.44157e-07	3.9881e-06	scaf16	77441	79981	-	411	-	-	-	-	-	-	-	101745002
BGIBMGA013818	13300	18623.2	7976.77	0.428325	-1.22322	2.47082e-07	4.03078e-06	scaf62	1863420	1867877	-	1713	-	-	-	-	-	-	-	-
BGIBMGA008362	82.463	127.446	37.4801	0.294087	-1.76569	2.64322e-07	4.25819e-06	scaf2	3738261	3740810	-	699	-	GO:0016020;GO:0016021;GO:0016021;	-	-	-	-	-	-
BGIBMGA003479	256.7	347.254	166.147	0.47846	-1.06353	3.00746e-07	4.79706e-06	scaf9	6211993	6221678	-	1092	-	GO:0003700;GO:0006357;	-	-	-	-	-	-
BGIBMGA004404	28932.6	41993	15872.1	0.37797	-1.40366	3.24202e-07	5.14577e-06	scaf37	1568113	1568868	-	756	-	GO:0005576;GO:0005576;	-	-	-	-	30K protein 5[Source:UniProtKB/TrEMBL;Acc:H9J4G4]	101746510
BGIBMGA009824	135.14	195.692	74.5894	0.381158	-1.39154	3.48038e-07	5.4904e-06	scaf51	2586360	2589281	-	672	-	GO:0005515;	-	-	-	-	-	-
BGIBMGA010600	33.5395	58.8878	8.1912	0.139098	-2.84582	3.71284e-07	5.81438e-06	scaf234	17089	20491	+	678	-	GO:0005576;GO:0005576;GO:0052689;GO:0052689;	-	-	-	-	-	-
BGIBMGA002154	538.944	777.428	300.46	0.386479	-1.37154	4.12377e-07	6.41122e-06	scaf64	2133463	2138845	-	618	-	-	-	-	-	-	-	-
BGIBMGA007724	368.001	632.045	103.957	0.164478	-2.60404	5.12839e-07	7.79467e-06	scaf3	1599886	1605672	-	1737	-	GO:0005315;GO:0005315;GO:0006817;GO:0006817;GO:0006817;GO:0016020;GO:0016020;GO:0016020;GO:0016021;GO:0016021;GO:0055085;	-	-	-	-	-	-
BGIBMGA009357	124.457	180.828	68.0856	0.376522	-1.40919	5.60281e-07	8.48729e-06	scaf53	264276	275471	+	1524	-	GO:0005515;	-	-	-	-	-	-
BGIBMGA006913	389.808	529.531	250.084	0.472275	-1.0823	5.73096e-07	8.65952e-06	scaf44	742527	750190	-	1752	-	GO:0005515;	-	-	-	-	-	-
BGIBMGA013482	208.856	332.308	85.4026	0.256998	-1.96017	5.92987e-07	8.90793e-06	scaf101	974145	1001671	-	2100	-	GO:0004601;GO:0004601;GO:0006979;GO:0006979;GO:0016020;GO:0016021;GO:0016021;GO:0020037;GO:0020037;GO:0055114;GO:0055114;GO:0098869;	-	-	-	-	-	-
BGIBMGA011291	74.8987	115.918	33.8794	0.29227	-1.77463	6.28186e-07	9.37122e-06	scaf12	1222673	1236042	-	2169	-	GO:0004114;GO:0004114;GO:0005515;GO:0007165;GO:0007165;GO:0008081;GO:0008081;GO:0016787;GO:0046872;GO:0046872;	-	-	-	-	-	-
BGIBMGA014250	90.7102	137.807	43.613	0.316478	-1.65982	6.29947e-07	9.38665e-06	scaf80	181535	195382	-	1449	-	-	-	-	-	-	-	-
BGIBMGA000949	87.5219	140.14	34.904	0.249065	-2.0054	6.90946e-07	1.0213e-05	scaf1	8829381	8833096	-	1065	-	GO:0005515;	-	-	-	-	-	-
BGIBMGA009944	232.125	313.902	150.348	0.478966	-1.06201	6.97959e-07	1.03049e-05	scaf137	343730	350860	+	912	-	GO:0005929;GO:0005929;GO:0035735;GO:0035735;	-	-	-	-	-	-
BGIBMGA000379	79.807	122.944	36.6704	0.29827	-1.74531	7.26481e-07	1.06355e-05	scaf18	1047681	1089336	+	4797	-	GO:0005089;GO:0005089;GO:0005515;GO:0007165;GO:0007165;GO:0035023;GO:0035023;	-	-	-	-	-	-
BGIBMGA011703	1516.1	2287.02	745.183	0.325831	-1.6178	7.26514e-07	1.06355e-05	scaf16	1122511	1130992	-	741	-	-	-	-	-	-	-	-
BGIBMGA002153	1716.82	2350.78	1082.85	0.460632	-1.11831	7.73938e-07	1.12719e-05	scaf64	2149395	2152397	-	525	-	-	-	-	-	-	-	-
BGIBMGA010067	245.333	328.672	161.993	0.492873	-1.02071	7.82526e-07	1.13841e-05	scaf45	1252039	1256864	+	1059	-	GO:0005545;GO:0005545;GO:0030136;GO:0030136;GO:0030276;GO:0030276;GO:0048268;GO:0048268;	-	-	-	-	-	-
BGIBMGA003846	218.016	328.429	107.602	0.327626	-1.60988	7.91792e-07	1.1493e-05	scaf72	2001012	2004966	-	579	-	-	-	-	-	-	-	-
BGIBMGA003253	133.54	190.973	76.1079	0.398528	-1.32725	8.2331e-07	1.1897e-05	scaf73	244285	246733	+	291	-	-	-	-	-	-	-	-
BGIBMGA007609	1207.35	1754.58	660.131	0.376234	-1.4103	8.28957e-07	1.19652e-05	scaf3	9527927	9545017	-	3969	-	GO:0005509;GO:0005509;	-	-	-	-	-	-
BGIBMGA013690	64.0549	101.094	27.0157	0.267233	-1.90383	8.47408e-07	1.21775e-05	scaf160	55322	68788	+	1623	-	GO:0004888;GO:0004888;GO:0004890;GO:0004890;GO:0005216;GO:0005216;GO:0005230;GO:0005230;GO:0005886;GO:0005886;GO:0006811;GO:0006811;GO:0006811;GO:0016020;GO:0016020;GO:0016020;GO:0016021;GO:0016021;GO:0016021;GO:0034220;GO:0034220;	-	-	-	-	-	-
BGIBMGA003848	9010.33	12317.2	5703.47	0.46305	-1.11076	9.3154e-07	1.32824e-05	scaf72	1877441	1878370	-	930	-	-	-	-	-	-	-	-
BGIBMGA006070	23.0309	42.4501	3.61177	0.0850827	-3.55499	9.39786e-07	1.33852e-05	scaf5	492443	499787	-	939	-	GO:0005623;GO:0005623;GO:0045454;GO:0045454;	-	-	-	-	-	-
BGIBMGA006869	225.766	329.728	121.803	0.369405	-1.43673	9.50371e-07	1.3521e-05	scaf70	1180002	1194887	+	795	-	GO:0016020;GO:0016020;GO:0016020;GO:0016021;GO:0016021;	-	-	-	-	-	-
BGIBMGA004062	495.873	667.893	323.853	0.484887	-1.04428	1.01036e-06	1.42489e-05	scaf36	196928	210787	+	1368	-	GO:0005975;GO:0005975;GO:0016301;GO:0016301;GO:0016310;GO:0016740;GO:0016773;GO:0016773;	-	-	-	-	-	-
BGIBMGA012698	49.8232	81.6996	17.9468	0.219669	-2.1866	1.0574e-06	1.48473e-05	scaf69	562942	569901	+	1443	-	GO:0003677;GO:0003677;GO:0008270;GO:0008270;	-	-	-	-	-	-
BGIBMGA002912	263.232	389.27	137.194	0.352439	-1.50456	1.07108e-06	1.5023e-05	scaf30	2731274	2745487	+	3396	-	-	-	-	-	-	-	-
BGIBMGA003728	118.502	188.801	48.2034	0.255313	-1.96966	1.14416e-06	1.58842e-05	scaf9	6525025	6530932	+	486	-	-	-	-	-	-	-	101736330
BGIBMGA011283	748.611	1013.35	483.869	0.477493	-1.06645	1.14486e-06	1.58842e-05	scaf12	1543366	1550739	-	2448	-	GO:0004672;GO:0004672;GO:0005524;GO:0005524;GO:0006468;GO:0006468;	K17541	-	-	-	-	101743513
BGIBMGA000951	288.673	393.637	183.71	0.466699	-1.09944	1.14602e-06	1.58842e-05	scaf1	8787954	8796180	-	2433	-	-	-	-	-	-	-	-
BGIBMGA002793	100.868	151.642	50.0947	0.330349	-1.59794	1.19709e-06	1.65212e-05	scaf30	2773007	2775298	-	1542	-	GO:0003756;GO:0003756;GO:0005783;GO:0005783;GO:0016671;GO:0016671;GO:0055114;GO:0055114;	-	-	-	-	-	-
BGIBMGA000687	92.0366	150.205	33.8684	0.225481	-2.14892	1.32958e-06	1.81362e-05	scaf8	4626664	4629813	+	963	-	GO:0016020;GO:0016020;GO:0016020;GO:0016021;GO:0016021;GO:0022857;GO:0022857;GO:0055085;GO:0055085;	-	-	-	-	-	-
BGIBMGA000681	182.738	273.458	92.0184	0.336499	-1.57132	1.33757e-06	1.82068e-05	scaf8	4319191	4320840	+	1470	-	-	-	-	-	-	-	-
BGIBMGA010121	143.409	203.721	83.0964	0.407894	-1.29374	1.45061e-06	1.95393e-05	scaf15	3927436	3959227	-	1245	-	GO:0007165;GO:0007165;	-	-	-	-	-	-
BGIBMGA003901	568.476	807.957	328.994	0.407192	-1.29622	1.47038e-06	1.97843e-05	scaf200	189123	199624	-	1335	-	GO:0000166;GO:0005524;GO:0005524;GO:0005524;GO:0006754;GO:0015986;GO:0015986;GO:0045261;GO:0045261;GO:0045261;GO:0046933;GO:0046933;GO:0099132;	-	-	-	-	ATP synthase subunit beta[Source:UniProtKB/TrEMBL;Acc:H9J314]	-
BGIBMGA001917	60.7076	96.0758	25.3393	0.263743	-1.9228	1.48565e-06	1.99489e-05	scaf28	766146	772938	+	1479	-	GO:0005515;	-	-	-	-	-	-
BGIBMGA003040	530.277	839.397	221.157	0.263471	-1.92428	1.50185e-06	2.01336e-05	scaf13	2842492	2842968	-	477	-	GO:0003677;GO:0003677;GO:0003677;GO:0005634;GO:0005634;	-	-	-	-	-	-
BGIBMGA013107	2319.15	3310.02	1328.28	0.401292	-1.31728	1.54274e-06	2.0612e-05	scaf4	9085120	9087288	+	1557	-	-	-	-	-	-	-	-
BGIBMGA010248	644.331	878.721	409.94	0.466519	-1.09999	1.54303e-06	2.0612e-05	scaf15	3317140	3327852	+	933	-	GO:0016020;GO:0016021;GO:0016021;GO:0022857;GO:0022857;GO:0055085;GO:0055085;	-	-	-	-	-	-
BGIBMGA005418	7581.26	11397.4	3765.08	0.330344	-1.59796	1.58373e-06	2.10685e-05	scaf19	840197	847409	+	2034	-	GO:0006629;GO:0016020;GO:0016021;GO:0016021;GO:0016042;GO:0016042;GO:0016787;GO:0016787;	-	-	-	-	-	101743473
BGIBMGA006846	146.849	216.172	77.5254	0.358628	-1.47944	1.72246e-06	2.27732e-05	scaf70	419038	429248	+	9168	-	GO:0005515;	-	-	-	-	-	-
BGIBMGA003254	141.25	200.181	82.3197	0.411226	-1.282	1.73833e-06	2.29595e-05	scaf73	257644	260854	+	252	-	-	-	-	-	-	-	-
BGIBMGA014365	55.1414	87.9254	22.3573	0.254276	-1.97553	1.75019e-06	2.30924e-05	scaf155	248228	258130	-	3702	-	GO:0003341;GO:0003341;GO:0003777;GO:0003777;GO:0005524;GO:0005524;GO:0005858;GO:0005858;GO:0007018;GO:0007018;GO:0016887;GO:0016887;	-	-	-	-	-	-
BGIBMGA001905	25.4683	46.0983	4.83834	0.104957	-3.25213	1.75479e-06	2.31295e-05	scaf28	743112	745131	-	1113	-	GO:0003824;GO:0003824;GO:0005515;GO:0006518;GO:0006518;GO:0016020;GO:0016020;	K18200	EC:4.3.2.5	-	-	-	101742958
BGIBMGA009879	88.456	131.949	44.9626	0.340756	-1.55319	1.85303e-06	2.43498e-05	scaf51	580672	584555	+	927	-	GO:0003723;GO:0003723;GO:0005515;	-	-	-	-	-	-
BGIBMGA000886	100.565	148.088	53.0418	0.358178	-1.48125	1.94328e-06	2.54838e-05	scaf1	12017707	12022620	-	390	-	-	K19363	-	-	-	-	101740969
BGIBMGA012339	117.917	170.493	65.3405	0.383244	-1.38366	2.02596e-06	2.64873e-05	scaf26	2567395	2617096	+	6021	-	-	-	-	-	-	-	-
BGIBMGA012562	73.7106	112.934	34.4872	0.305374	-1.71135	2.06481e-06	2.69679e-05	scaf77	675405	688802	+	1008	-	GO:0004888;GO:0004888;GO:0005216;GO:0005216;GO:0005230;GO:0005230;GO:0005886;GO:0006811;GO:0006811;GO:0006811;GO:0016020;GO:0016021;GO:0016021;GO:0016021;GO:0022848;GO:0022848;GO:0030054;GO:0030054;GO:0034220;GO:0034220;GO:0045202;GO:0045211;GO:0045211;GO:0045211;GO:0060078;GO:0060079;	-	-	-	-	-	-
BGIBMGA012082	4494.28	6161.49	2827.08	0.45883	-1.12397	2.08176e-06	2.71618e-05	scaf24	421282	423309	+	1395	-	GO:0005215;GO:0005215;GO:0016020;GO:0016020;GO:0016020;GO:0016021;GO:0016021;GO:0016021;GO:0022857;GO:0022857;GO:0055085;GO:0055085;	-	-	-	-	-	-
BGIBMGA014606	453.773	654.512	253.033	0.386598	-1.37109	2.10332e-06	2.74154e-05	scaf583	84	1171	+	516	-	-	-	-	-	-	-	-
BGIBMGA007563	491.368	705.195	277.541	0.393566	-1.34532	2.41201e-06	3.09698e-05	scaf66	520744	521298	+	555	-	-	-	-	-	-	-	-
BGIBMGA014347	680.064	920.064	440.063	0.478296	-1.06403	2.43688e-06	3.12269e-05	scaf2644	54	659	-	606	-	-	-	-	-	-	-	-
BGIBMGA003276	340.712	502.937	178.488	0.354891	-1.49455	2.61127e-06	3.31979e-05	scaf73	1354098	1356880	+	345	-	-	-	-	-	-	-	-
BGIBMGA012210	31.5896	54.819	8.36013	0.152504	-2.71308	2.80254e-06	3.54549e-05	scaf75	1629770	1646915	+	2226	-	-	-	-	-	-	-	-
BGIBMGA003090	86.5608	129.318	43.8039	0.338731	-1.56179	2.97697e-06	3.74413e-05	scaf13	1295454	1295774	+	321	-	-	-	-	-	-	-	-
BGIBMGA008803	30895.9	41497.7	20294.2	0.489045	-1.03196	3.17939e-06	3.96779e-05	scaf134	755216	755530	-	315	-	-	-	-	-	-	-	101741350
BGIBMGA012765	358.371	538.973	177.768	0.329827	-1.60022	3.18977e-06	3.97689e-05	scaf4	8734595	8737487	-	2010	-	-	-	-	-	-	-	-
BGIBMGA013128	28.4564	49.8692	7.04359	0.141241	-2.82376	3.52232e-06	4.35365e-05	scaf124	167050	171851	-	4449	-	-	-	-	-	-	-	-
BGIBMGA012467	297.38	413.954	180.807	0.43678	-1.19502	4.32544e-06	5.27556e-05	scaf56	1295846	1309166	-	2337	-	GO:0005515;GO:0007015;GO:0007015;GO:0007155;GO:0007155;	-	-	-	-	-	-
BGIBMGA005300	114.854	164.525	65.1826	0.396185	-1.33575	4.45969e-06	5.42393e-05	scaf19	5419679	5437334	-	1515	-	GO:0006508;GO:0006751;GO:0006751;GO:0036374;GO:0036374;	-	-	-	-	-	-
BGIBMGA013661	208.447	279.766	137.128	0.490152	-1.0287	4.55109e-06	5.52803e-05	scaf162	232979	238508	+	3228	-	-	-	-	-	-	-	-
BGIBMGA005839	73.1039	119.023	27.1847	0.228398	-2.13038	4.56563e-06	5.53712e-05	scaf125	330328	332481	-	1389	-	GO:0005515;	-	-	-	-	-	101738213
BGIBMGA008723	121.38	173.111	69.65	0.402344	-1.3135	4.69867e-06	5.69311e-05	scaf90	1055230	1060413	+	645	-	GO:0000166;GO:0003924;GO:0003924;GO:0005525;GO:0005525;GO:0005525;GO:0007165;GO:0007165;GO:0016020;GO:0016020;	-	-	-	-	-	-
BGIBMGA003683	64.396	99.2222	29.5699	0.298016	-1.74654	4.72968e-06	5.71995e-05	scaf9	4108597	4120435	+	1251	-	GO:0005506;GO:0005506;GO:0016705;GO:0016705;GO:0020037;GO:0020037;GO:0055114;GO:0055114;	-	-	-	-	-	-
BGIBMGA003947	162.543	224.146	100.94	0.450333	-1.15094	4.88831e-06	5.8897e-05	scaf105	202402	221084	-	2343	-	GO:0005515;	-	-	-	-	-	-
BGIBMGA014599	154.198	213.947	94.4495	0.441462	-1.17964	4.936e-06	5.93608e-05	scaf543	4721	7101	-	1425	-	-	-	-	-	-	-	-
BGIBMGA003851	111.974	159.711	64.237	0.402207	-1.31399	5.5904e-06	6.58799e-05	scaf72	1473937	1483913	-	1749	-	GO:0005216;GO:0005216;GO:0005244;GO:0005249;GO:0005249;GO:0005267;GO:0006811;GO:0006811;GO:0006811;GO:0006813;GO:0006813;GO:0006813;GO:0008076;GO:0008076;GO:0016020;GO:0016020;GO:0016020;GO:0016021;GO:0034765;GO:0034765;GO:0051260;GO:0051260;GO:0055085;GO:0055085;GO:0071805;	-	-	-	-	-	-
BGIBMGA004405	277.153	413.15	141.156	0.341659	-1.54937	5.77816e-06	6.78448e-05	scaf37	1533823	1534587	-	765	-	GO:0005576;GO:0005576;	-	-	-	-	-	101743208
BGIBMGA005847	380.444	532.093	228.795	0.429991	-1.21762	5.8816e-06	6.89965e-05	scaf125	103958	117694	-	1569	-	GO:0016020;GO:0016021;GO:0016021;GO:0016021;GO:0033227;GO:0033227;GO:0051033;GO:0051033;	-	-	-	-	-	-
BGIBMGA007829	30.4055	52.5408	8.27016	0.157404	-2.66745	5.99224e-06	7.01669e-05	scaf3	2498958	2504482	+	1101	-	GO:0016020;GO:0016021;GO:0016021;	-	-	-	-	-	-
BGIBMGA000095	186.374	251.61	121.138	0.481454	-1.05453	6.36519e-06	7.43989e-05	scaf43	763800	764868	-	345	-	-	-	-	-	-	-	-
BGIBMGA007766	443.929	775.655	112.204	0.144656	-2.7893	6.55589e-06	7.64894e-05	scaf3	43287	44423	+	1137	-	GO:0006629;GO:0006629;GO:0008081;GO:0008081;	-	-	-	-	-	101740291
BGIBMGA001742	695.071	1084.69	305.454	0.281606	-1.82825	7.06575e-06	8.17726e-05	scaf35	849609	861673	+	1017	-	GO:0005484;GO:0005484;GO:0005622;GO:0005622;GO:0006886;GO:0006886;GO:0016020;GO:0016020;GO:0016192;GO:0016192;GO:0061025;	-	-	-	-	-	-
BGIBMGA006578	29.9606	51.741	8.18019	0.158099	-2.6611	7.46622e-06	8.60215e-05	scaf10	5339948	5343868	-	366	-	GO:0004888;GO:0004888;GO:0005216;GO:0005216;GO:0005230;GO:0005230;GO:0006811;GO:0006811;GO:0016021;GO:0016021;GO:0034220;GO:0034220;	-	-	-	-	-	-
BGIBMGA010374	148.287	204.196	92.3783	0.452401	-1.14433	8.27534e-06	9.44165e-05	scaf6	7405043	7406660	-	249	-	GO:0046872;GO:0046872;GO:0046872;	-	-	-	-	-	105842113
BGIBMGA003802	123.364	173.084	73.6437	0.425481	-1.23283	8.95865e-06	0.000100875	scaf91	1550600	1553371	+	2679	-	GO:0004383;GO:0004383;GO:0004672;GO:0004672;GO:0004713;GO:0004713;GO:0005524;GO:0005524;GO:0006182;GO:0006468;GO:0006468;GO:0018108;	-	-	-	-	-	-
BGIBMGA007228	120.61	174.71	66.5102	0.380688	-1.39332	1.03933e-05	0.000115417	scaf131	226328	259966	-	3720	+NSD-2	GO:0005328;GO:0005328;GO:0006836;GO:0006836;GO:0015293;GO:0016020;GO:0016021;GO:0016021;GO:0016021;GO:0055085;	-	-	-	-	Transporter [Source:UniProtKB/TrEMBL;Acc:H9JCI3]"	-
BGIBMGA004693	24.8537	43.9014	5.806	0.132251	-2.91865	1.25978e-05	0.000136492	scaf108	228305	232801	-	1113	-	-	-	-	-	-	-	-
BGIBMGA010174	180.564	248.53	112.598	0.453057	-1.14224	1.26328e-05	0.000136757	scaf15	1179049	1187681	-	912	-	-	-	-	-	-	-	-
BGIBMGA001255	130.779	182.4	79.1578	0.433978	-1.2043	1.30291e-05	0.000140811	scaf1	11332386	11334209	+	1824	-	GO:0000166;GO:0000166;GO:0005622;GO:0005622;GO:0009190;GO:0009190;GO:0016020;GO:0016021;GO:0016021;GO:0016829;GO:0016849;GO:0016849;GO:0035556;GO:0035556;	-	-	-	-	-	-
BGIBMGA012466	154.501	211.29	97.7124	0.462457	-1.11261	1.31974e-05	0.00014251	scaf56	1309903	1328322	-	1704	-	-	-	-	-	-	-	-
BGIBMGA008349	76.7062	116.27	37.1423	0.319448	-1.64635	1.33682e-05	0.000143993	scaf2	4250477	4251715	-	1239	-	-	-	-	-	-	-	-
BGIBMGA000885	76.7698	113.775	39.7643	0.349499	-1.51664	1.47239e-05	0.000156892	scaf1	12092585	12097497	-	411	-	-	-	-	-	-	-	-
BGIBMGA009488	102.821	161.624	44.0169	0.272341	-1.87651	1.52597e-05	0.0001622	scaf40	621406	637293	+	1188	-	GO:0003993;GO:0003993;GO:0016311;	-	-	-	-	-	-
BGIBMGA002932	146.259	199.937	92.5802	0.463047	-1.11077	1.6388e-05	0.000172911	scaf30	3972819	3975674	+	780	-	GO:0016020;GO:0016021;GO:0016021;GO:0016491;GO:0016491;GO:0055114;GO:0055114;	-	-	-	-	-	-
BGIBMGA013687	14.8827	28.359	1.40652	0.0495968	-4.33361	1.64861e-05	0.000173804	scaf160	204653	205486	-	834	C/EBP	GO:0003700;GO:0003700;GO:0006355;GO:0006355;	K10052	-	-	-	Chorion specific C/EBP[Source:UniProtKB/TrEMBL;Acc:Q38Q34]	692780
BGIBMGA005952	131.311	181.777	80.8452	0.444749	-1.16894	1.66161e-05	0.000174605	scaf5	7153045	7174834	-	849	-	GO:0000166;GO:0004672;GO:0004672;GO:0004674;GO:0004674;GO:0004674;GO:0005524;GO:0005524;GO:0005524;GO:0006468;GO:0006468;GO:0016301;GO:0016310;GO:0016740;	-	-	-	-	-	-
BGIBMGA002969	79.1297	116.189	42.0706	0.362088	-1.46559	1.69522e-05	0.000177703	scaf13	5738836	5741252	-	1752	-	GO:0030314;	-	-	-	-	-	-
BGIBMGA014457	55.9262	86.2431	25.6092	0.296942	-1.75175	1.76922e-05	0.000184559	scaf264	34621	35991	+	501	-	-	-	-	-	-	-	-
BGIBMGA008524	102.234	152.034	52.434	0.344883	-1.53582	1.92028e-05	0.000199191	scaf2	7430858	7447989	+	1776	-	GO:0003824;GO:0003824;GO:0008152;	-	-	-	-	-	101736671
BGIBMGA010567	78.7963	116.624	40.9689	0.351291	-1.50926	1.97599e-05	0.000203862	scaf6	6589252	6594094	+	681	-	-	-	-	-	-	-	-
BGIBMGA002440	25.2303	43.766	6.69471	0.152966	-2.70871	2.02719e-05	0.000208437	scaf14	792351	796956	-	1371	-	-	-	-	-	-	-	-
BGIBMGA006494	79.6212	116.474	42.7683	0.367192	-1.44539	2.04705e-05	0.000210144	scaf11	4064790	4065068	+	279	-	GO:0003676;GO:0003676;GO:0003677;GO:0003677;	-	-	-	-	-	-
BGIBMGA002442	46.8188	79.3815	14.2561	0.17959	-2.47722	2.15088e-05	0.000219233	scaf14	680838	683307	-	570	-	GO:0004930;GO:0004930;GO:0004930;GO:0007165;GO:0007186;GO:0007186;GO:0007186;GO:0016020;GO:0016021;GO:0016021;GO:0016021;	-	-	-	-	-	-
BGIBMGA010735	46.7125	73.7117	19.7132	0.267437	-1.90273	2.20882e-05	0.000224254	scaf25	2563689	2578616	-	1440	-	GO:0004553;GO:0004553;GO:0005975;GO:0005975;	-	-	-	-	-	-
BGIBMGA005015	206.301	342.299	70.3019	0.205381	-2.28362	2.22305e-05	0.000225167	scaf32	4031816	4050823	-	1311	-	GO:0004497;GO:0004499;GO:0004499;GO:0016491;GO:0050660;GO:0050660;GO:0050661;GO:0050661;GO:0055114;GO:0055114;GO:0055114;	-	-	-	-	-	-
BGIBMGA014470	170.995	246.743	95.2482	0.386023	-1.37324	2.38123e-05	0.000238938	scaf261	16997	22942	+	3372	-	GO:0005509;GO:0005509;	-	-	-	-	-	-
BGIBMGA006950	52.833	82.0931	23.5729	0.287148	-1.80013	2.52128e-05	0.000251039	scaf44	1750276	1752747	+	261	-	-	-	-	-	-	-	-
BGIBMGA009270	52.2196	81.0352	23.404	0.288812	-1.7918	2.53921e-05	0.000252629	scaf38	1549465	1550181	+	717	-	-	-	-	-	-	-	101740122
BGIBMGA011228	1063.04	1581.42	544.663	0.344415	-1.53778	2.70155e-05	0.000266929	scaf12	3891903	3918977	-	3936	-	GO:0000166;GO:0005524;GO:0005524;GO:0005524;GO:0016020;GO:0016021;GO:0016021;GO:0016021;GO:0016887;GO:0016887;GO:0042626;GO:0042626;GO:0055085;GO:0055085;	-	-	-	-	-	-
BGIBMGA003230	171.038	228.5	113.577	0.497055	-1.00852	2.70156e-05	0.000266929	scaf73	831133	835658	-	4371	-	GO:0001172;GO:0003968;GO:0003968;GO:0004482;GO:0004482;GO:0005524;GO:0005524;GO:0006370;GO:0006370;GO:0019012;GO:0106005;	-	-	-	-	-	-
BGIBMGA010342	280.845	401.531	160.159	0.398871	-1.32601	2.80652e-05	0.000275822	scaf109	478736	480596	+	312	-	-	-	-	-	-	-	-
BGIBMGA000357	57.808	88.7123	26.9037	0.303269	-1.72133	2.85307e-05	0.000280182	scaf18	103721	105420	-	480	PTTH	-	-	-	-	-	Prothoracicotropic hormone P2K P6KProthoracicotropic hormone [Source:UniProtKB/Swiss-Prot;Acc:P17219]	-
BGIBMGA002156	4617.02	6365.66	2868.37	0.450601	-1.15008	2.93892e-05	0.00028752	scaf64	2125315	2127939	-	909	-	GO:0003700;GO:0003700;GO:0006355;GO:0006355;GO:0008270;GO:0008270;GO:0043565;GO:0043565;GO:0046872;	-	-	-	-	-	-
BGIBMGA010313	224.703	324.7	124.706	0.384066	-1.38057	2.96051e-05	0.000289412	scaf127	475001	480032	+	570	-	-	-	-	-	-	-	-
BGIBMGA006071	23.6306	41.3652	5.89598	0.142535	-2.81061	3.24446e-05	0.000313842	scaf5	490389	492049	-	672	-	-	-	-	-	-	-	-
BGIBMGA011393	95.1605	135.963	54.3583	0.399803	-1.32264	3.26295e-05	0.000315394	scaf12	5089761	5122946	+	2478	-	GO:0004672;GO:0004672;GO:0005524;GO:0005524;GO:0006468;GO:0006468;	-	-	-	-	-	-
BGIBMGA006456	285.731	385.445	186.016	0.482601	-1.0511	3.75509e-05	0.000357871	scaf11	907751	918874	+	2100	-	-	-	-	-	-	-	-
BGIBMGA002195	93.4163	132.722	54.1104	0.407697	-1.29443	3.89266e-05	0.000369617	scaf64	2178488	2180068	+	615	-	GO:0016020;GO:0016021;GO:0016021;	-	-	-	-	-	-
BGIBMGA007598	41.39	65.5199	17.2601	0.263433	-1.92449	3.95892e-05	0.000374805	scaf3	9755739	9760895	-	1062	-	GO:0004888;GO:0004888;GO:0004890;GO:0004890;GO:0005216;GO:0005216;GO:0005230;GO:0005230;GO:0005886;GO:0005886;GO:0006811;GO:0006811;GO:0006811;GO:0016020;GO:0016020;GO:0016020;GO:0016021;GO:0016021;GO:0016021;GO:0034220;GO:0034220;	-	-	-	-	-	-
BGIBMGA004990	95.2233	135.38	55.0671	0.406761	-1.29775	4.12588e-05	0.000389184	scaf65	1392406	1398314	+	1848	-	GO:0008017;GO:0008017;	K19680	-	-	-	-	101739256
BGIBMGA012465	153.113	237.33	68.8953	0.290293	-1.78442	4.1433e-05	0.000390542	scaf56	1387596	1391399	-	3621	-	-	-	-	-	-	-	-
BGIBMGA009074	163.824	218.83	108.818	0.497271	-1.0079	4.15568e-05	0.000391423	scaf63	721220	722636	-	621	-	GO:0003677;GO:0003677;GO:0005634;GO:0005634;	-	-	-	-	-	-
BGIBMGA000245	27.5414	46.7227	8.36013	0.178931	-2.48253	4.25072e-05	0.000399499	scaf18	3596471	3600742	-	513	BMORCPR130	GO:0042302;GO:0042302;GO:0042302;	-	-	-	-	Putative cuticle protein[Source:UniProtKB/TrEMBL;Acc:C0H6X2]	100379349
BGIBMGA004844	31.5021	52.2699	10.7343	0.205363	-2.28375	4.50259e-05	0.00042133	scaf46	639089	654538	+	2748	-	GO:0004930;GO:0004930;GO:0007186;GO:0016020;GO:0016020;GO:0016020;GO:0016021;GO:0016021;	-	-	-	-	-	-
BGIBMGA013520	123.087	169.3	76.8736	0.454067	-1.13902	5.04215e-05	0.000468086	scaf101	398207	407994	+	336	-	-	-	-	-	-	-	-
BGIBMGA011740	27.1285	46.1667	8.09021	0.175239	-2.5126	5.21318e-05	0.000482229	scaf16	149609	155743	-	513	-	GO:0006887;GO:0006887;GO:0016020;GO:0016020;GO:0017137;GO:0017137;GO:0048786;GO:0048786;	-	-	-	-	-	-
BGIBMGA014132	282.796	377.797	187.795	0.497081	-1.00845	5.23748e-05	0.000484129	scaf76	1222327	1232094	+	1590	-	GO:0000166;GO:0004672;GO:0004672;GO:0004674;GO:0004674;GO:0004674;GO:0004697;GO:0004697;GO:0005524;GO:0005524;GO:0005524;GO:0006468;GO:0006468;GO:0008270;GO:0008270;GO:0016301;GO:0016310;GO:0016740;	-	-	-	-	-	-
BGIBMGA009942	94.4918	133.197	55.7869	0.41883	-1.25556	5.43697e-05	0.000499705	scaf137	327743	332712	+	2412	-	-	-	-	-	-	-	-
BGIBMGA010500	20.0231	35.7367	4.30952	0.120591	-3.05181	5.80966e-05	0.000531737	scaf6	268812	278566	+	1590	-	GO:0042302;GO:0042302;GO:0042302;	-	-	-	-	-	-
BGIBMGA005941	121.972	189.384	54.5603	0.288093	-1.7954	6.63246e-05	0.00059808	scaf5	7942791	7949769	-	798	-	GO:0016020;GO:0016021;GO:0016021;	-	-	-	-	-	-
BGIBMGA007907	30.8128	50.9812	10.6443	0.20879	-2.25988	7.21086e-05	0.000642604	scaf3	6056119	6061794	+	1881	-	GO:0005515;	-	-	-	-	-	-
BGIBMGA003478	123.362	178.008	68.7154	0.386025	-1.37323	7.47302e-05	0.000662762	scaf9	6248419	6260451	-	954	-	GO:0003700;GO:0006357;	-	-	-	-	-	-
BGIBMGA013767	33.1298	54.2088	12.0509	0.222304	-2.16939	7.5096e-05	0.000665549	scaf47	115456	116945	-	231	-	-	-	-	-	-	-	-
BGIBMGA007435	137.685	185.738	89.6332	0.48258	-1.05116	7.71479e-05	0.000680363	scaf55	2449905	2451173	+	1269	-	GO:0016020;GO:0016021;GO:0016021;	-	-	-	-	-	-
BGIBMGA002231	64.8444	102.504	27.1847	0.265206	-1.91482	7.83228e-05	0.000689411	scaf34	4108264	4123983	-	1419	-	GO:0005515;	-	-	-	-	-	-
BGIBMGA012661	59.2033	88.3189	30.0877	0.340671	-1.55355	8.35162e-05	0.000729678	scaf129	350793	361412	+	1200	-	GO:0003824;GO:0003824;GO:0008152;GO:0016740;GO:0016746;GO:0016747;GO:0016747;	K07508	EC:2.3.1.16	-	-	-	101738252
BGIBMGA005481	20.3461	36.2927	4.39949	0.121222	-3.04427	8.40838e-05	0.000734112	scaf19	4305876	4306670	+	612	-	GO:0005515;	-	-	-	-	-	-
BGIBMGA004991	18.4814	33.0921	3.87067	0.116966	-3.09583	9.08914e-05	0.000788214	scaf65	1422376	1428267	+	1131	-	-	-	-	-	-	-	-
BGIBMGA013149	1178.75	1574.17	783.326	0.497612	-1.00691	9.22989e-05	0.000798274	scaf124	553024	563173	+	1458	-	GO:0005634;GO:0005634;	K13118	-	-	-	-	101745334
BGIBMGA008987	61.0417	90.9492	31.1343	0.342326	-1.54656	9.31344e-05	0.00080427	scaf17	2465063	2476834	+	936	-	GO:0016020;GO:0016021;GO:0016021;	-	-	-	-	-	-
BGIBMGA002923	35.4156	59.0503	11.7809	0.199507	-2.32549	9.69328e-05	0.000829457	scaf30	3309111	3311236	+	327	-	-	-	-	-	-	-	-
BGIBMGA008806	51.445	84.4254	18.4646	0.218709	-2.19291	0.000105535	0.000898303	scaf134	68500	95325	-	5772	-	-	-	-	-	-	-	-
BGIBMGA006337	93.2237	130.132	56.3157	0.432759	-1.20836	0.000107698	0.000915507	scaf49	2340355	2346387	+	1224	-	-	-	-	-	-	-	-
BGIBMGA010420	25.5309	42.8707	8.1912	0.191068	-2.38784	0.000108023	0.000917666	scaf6	3797137	3802257	-	1029	-	GO:0003676;GO:0003676;	-	-	-	-	-	-
BGIBMGA006542	22.8729	39.1412	6.60474	0.168742	-2.56711	0.000109076	0.000924785	scaf10	7258575	7259999	-	1425	-	-	-	-	-	-	-	-
BGIBMGA012146	30.3348	49.6653	11.0042	0.221568	-2.17418	0.000111161	0.000939374	scaf75	1263275	1273259	-	915	BMORCPR48	GO:0042302;GO:0042302;GO:0042302;	-	-	-	-	Putative cuticle protein[Source:UniProtKB/TrEMBL;Acc:C0H6P0]	100379423
BGIBMGA006381	30.8323	51.808	9.85662	0.190253	-2.39401	0.000112828	0.000951018	scaf11	4092999	4098870	-	249	-	GO:0005576;GO:0005576;GO:0006030;GO:0006030;GO:0008061;GO:0008061;	-	-	-	-	-	-
BGIBMGA012326	35.3884	56.8805	13.8962	0.244306	-2.03324	0.000118698	0.000994601	scaf26	1798935	1800909	+	435	-	-	-	-	-	-	-	-
BGIBMGA014436	13.9647	25.904	2.02531	0.078185	-3.67696	0.000126662	0.00105244	scaf212	19836	31115	-	852	-	GO:0004252;GO:0004252;GO:0006508;GO:0006508;	-	-	-	-	-	-
BGIBMGA005264	13.924	25.8228	2.02531	0.0784311	-3.67243	0.00012842	0.00106366	scaf58	218539	219159	-	297	-	-	-	-	-	-	-	-
BGIBMGA011176	74.9291	107.36	42.4984	0.39585	-1.33697	0.000130787	0.00107977	scaf12	6443453	6446509	-	630	-	GO:0003779;GO:0003779;GO:0007015;GO:0007015;GO:0007049;	-	-	-	-	-	-
BGIBMGA009522	31.672	55.2538	8.09021	0.146419	-2.77182	0.000132206	0.00109008	scaf40	2317300	2337538	+	1104	-	GO:0005506;GO:0005506;GO:0016705;GO:0016705;GO:0020037;GO:0020037;GO:0055114;GO:0055114;	-	-	-	-	-	-
BGIBMGA005875	421.003	575.199	266.806	0.463851	-1.10827	0.00013339	0.00109635	scaf67	1578457	1601227	-	3366	-	GO:0000166;GO:0003774;GO:0003777;GO:0003777;GO:0005524;GO:0005524;GO:0005524;GO:0007018;GO:0007018;GO:0008017;GO:0008017;	-	-	-	-	-	-
BGIBMGA011752	35.9172	57.4094	14.425	0.251266	-1.99271	0.000135695	0.00111316	scaf16	357798	365343	+	1635	-	GO:0005515;	-	-	-	-	-	-
BGIBMGA011312	29.6422	48.7301	10.5544	0.216588	-2.20697	0.000139535	0.00114322	scaf12	794312	796392	+	327	-	-	-	-	-	-	-	-
BGIBMGA003002	110.689	151.357	70.0209	0.462622	-1.11209	0.000143784	0.0011743	scaf13	4358011	4375650	-	6054	-	GO:0004842;GO:0004842;GO:0016567;GO:0046872;GO:0046872;GO:0071797;GO:0071797;	-	-	-	-	-	-
BGIBMGA007516	166.472	246.292	86.6512	0.351823	-1.50708	0.000151915	0.0012298	scaf66	1042600	1045518	-	1389	BMO.4342	GO:0000166;GO:0003746;GO:0003746;GO:0003746;GO:0003924;GO:0003924;GO:0003924;GO:0005525;GO:0005525;GO:0005525;GO:0005737;GO:0005737;GO:0006414;GO:0006414;GO:0006414;	K03231	-	-	-	Elongation factor 1-alpha[Source:UniProtKB/TrEMBL;Acc:H9JDB9]	101743635
BGIBMGA012464	33.4034	53.7883	13.0185	0.242033	-2.04673	0.000160119	0.00128493	scaf56	1416879	1429465	-	1476	-	GO:0005515;	-	-	-	-	-	-
BGIBMGA013574	25.4935	42.6269	8.36013	0.196124	-2.35017	0.000167499	0.00133092	scaf78	1291754	1303120	-	1278	-	GO:0016020;GO:0016021;GO:0016021;GO:0016021;GO:0022857;GO:0022857;GO:0055085;GO:0055085;	-	-	-	-	-	-
BGIBMGA004995	45.4885	69.7783	21.1987	0.303801	-1.7188	0.000171642	0.00135798	scaf65	1545137	1551937	+	549	-	-	-	-	-	-	-	-
BGIBMGA008388	42.9759	66.7674	19.1844	0.287332	-1.79921	0.00018836	0.00146953	scaf2	1160837	1162441	-	858	-	-	-	-	-	-	-	101740013
BGIBMGA011613	60.516	89.1999	31.832	0.356862	-1.48656	0.000189786	0.00147887	scaf16	5425059	5425226	-	168	-	-	-	-	-	-	-	-
BGIBMGA012214	59.4735	87.003	31.944	0.36716	-1.44552	0.000199737	0.00155079	scaf239	12449	13118	-	222	-	-	-	-	-	-	-	-
BGIBMGA006769	22.0872	38.3684	5.806	0.151322	-2.7243	0.000203145	0.00157377	scaf10	6042951	6050173	+	1269	-	-	-	-	-	-	-	-
BGIBMGA009083	88.5757	123.581	53.5706	0.433486	-1.20594	0.000204767	0.00158222	scaf63	33053	37738	+	1161	-	-	-	-	-	-	-	-
BGIBMGA003508	26.7755	44.4032	9.14785	0.206018	-2.27916	0.000208482	0.001609	scaf9	4262335	4263076	-	432	-	-	-	-	-	-	-	101739838
BGIBMGA013163	88.4521	129.859	47.0448	0.362275	-1.46484	0.000215209	0.00165695	scaf39	2961971	2969064	-	552	BMORCPR56	GO:0042302;GO:0042302;GO:0042302;	-	-	-	-	Putative cuticle protein[Source:UniProtKB/TrEMBL;Acc:C0H6P8]	100379415
BGIBMGA000514	74.6456	106.275	43.0162	0.404764	-1.30485	0.000219178	0.0016832	scaf8	5914470	5916638	-	357	-	-	-	-	-	-	-	-
BGIBMGA013290	82.3862	116.501	48.2714	0.414343	-1.2711	0.00021927	0.0016832	scaf71	1753620	1761667	-	1074	-	GO:0016020;GO:0016021;GO:0016021;	-	-	-	-	-	-
BGIBMGA003530	4025.94	6432.01	1619.88	0.251846	-1.98938	0.000224656	0.00171943	scaf9	3162419	3164333	-	888	-	-	-	-	-	-	-	-
BGIBMGA001562	12.1677	22.8389	1.49649	0.0655237	-3.93184	0.000225507	0.0017239	scaf7	5509681	5512808	+	261	-	GO:0007268;GO:0007268;GO:0019992;GO:0019992;	-	-	-	-	-	-
BGIBMGA005566	44.2833	67.7168	20.8498	0.307897	-1.69948	0.000226676	0.00172976	scaf33	1967640	1969175	-	771	-	-	-	-	-	-	-	-
BGIBMGA007564	2866.67	3870.52	1862.81	0.481283	-1.05504	0.000228458	0.00173822	scaf66	535288	569257	+	2571	-	-	-	-	-	-	-	-
BGIBMGA014063	792.761	1086.4	499.124	0.459429	-1.12209	0.000237539	0.00179356	scaf223	35899	46481	+	909	-	GO:0004363;GO:0004363;GO:0005524;GO:0005524;GO:0006750;GO:0006750;GO:0016874;GO:0016874;	-	-	-	-	-	-
BGIBMGA010311	120.284	161.569	78.9999	0.488955	-1.03223	0.000239547	0.00180491	scaf127	420628	421165	+	282	-	-	-	-	-	-	-	-
BGIBMGA012231	35.5487	56.0536	15.0438	0.268383	-1.89764	0.000239601	0.00180491	scaf26	4022650	4023967	-	1056	-	GO:0005515;	-	-	-	-	-	-
BGIBMGA000911	103.708	140.806	66.6111	0.473072	-1.07987	0.000250837	0.00187749	scaf1	10746672	10752798	-	1683	-	GO:0003777;GO:0003777;GO:0005524;GO:0005524;GO:0007018;GO:0007018;	-	-	-	-	-	-
BGIBMGA006745	79.6768	112.568	46.7859	0.415624	-1.26665	0.000259774	0.00193876	scaf10	4836432	4840937	+	2130	-	GO:0005507;GO:0005507;GO:0016491;GO:0016491;GO:0016491;GO:0046872;GO:0055114;GO:0055114;GO:0055114;	-	-	-	-	-	-
BGIBMGA004925	26.8153	50.5477	3.08295	0.0609908	-4.03526	0.000260114	0.00194018	scaf65	1199083	1202442	-	516	-	GO:0016020;GO:0016021;GO:0016021;	-	-	-	-	-	101738037
BGIBMGA003591	33.3227	52.3783	14.2671	0.272386	-1.87627	0.000278307	0.00206277	scaf9	424451	429635	-	408	-	-	-	-	-	-	-	-
BGIBMGA012306	114.965	153.812	76.1189	0.494884	-1.01484	0.000292743	0.00215614	scaf26	326377	335668	+	2034	-	-	-	-	-	-	-	-
BGIBMGA013938	1763.6	2498.85	1028.36	0.411533	-1.28092	0.000324981	0.00236633	scaf29	318459	319441	-	495	-	GO:0005634;GO:0005634;GO:0006950;GO:0051726;GO:0051726;	K04402	-	-	-	-	101742570
BGIBMGA010192	114.214	152.658	75.77	0.496337	-1.01061	0.00032811	0.00238531	scaf15	387665	388702	+	1038	-	-	-	-	-	-	-	101739557
BGIBMGA001424	42.8992	66.3881	19.4103	0.292376	-1.7741	0.000343435	0.00247718	scaf7	4976559	4976897	-	339	-	-	-	-	-	-	-	-
BGIBMGA002614	106.847	159.875	53.8185	0.336629	-1.57077	0.0003451	0.00248642	scaf20	2083206	2084669	-	162	-	-	-	-	-	-	-	-
BGIBMGA008575	88.735	121.492	55.9778	0.460752	-1.11794	0.000366707	0.0026086	scaf85	1430966	1437705	-	2559	-	-	-	-	-	-	-	-
BGIBMGA003945	11.2887	21.1709	1.40652	0.0664363	-3.91188	0.000477428	0.00330746	scaf105	315279	327628	-	1611	-	GO:0004497;GO:0004497;GO:0005506;GO:0005506;GO:0016491;GO:0016705;GO:0016705;GO:0020037;GO:0020037;GO:0046872;GO:0055114;GO:0055114;GO:0055114;	-	-	-	-	-	-
BGIBMGA009592	54.1683	78.9467	29.3899	0.372276	-1.42556	0.000477511	0.00330746	scaf103	342124	345626	-	336	-	-	-	-	-	-	-	101745081
BGIBMGA002885	21.1815	35.8593	6.50376	0.181369	-2.463	0.000517585	0.00353569	scaf30	1529073	1537279	+	1311	-	GO:0004222;GO:0004222;GO:0006508;GO:0006508;GO:0006508;GO:0008233;GO:0008237;GO:0008237;GO:0008237;GO:0008270;GO:0008270;GO:0016787;GO:0031012;GO:0031012;GO:0046872;	-	-	-	-	-	-
BGIBMGA002163	29.1283	46.4647	11.792	0.253783	-1.97833	0.000532425	0.00362746	scaf64	1896803	1900218	-	1137	-	-	-	-	-	-	-	-
BGIBMGA011705	29.6513	47.2517	12.0509	0.255036	-1.97123	0.000542808	0.00368847	scaf16	1002776	1028916	-	1287	-	-	-	-	-	-	-	-
BGIBMGA010443	117.929	161.122	74.7363	0.463848	-1.10828	0.000554476	0.00375786	scaf6	2071196	2071738	-	543	-	GO:0016020;GO:0016021;GO:0016021;	-	-	-	-	-	-
BGIBMGA002531	54.2484	79.0279	29.4689	0.372892	-1.42317	0.000574303	0.00387189	scaf14	5203566	5213879	+	462	-	GO:0006508;GO:0006508;GO:0008237;GO:0008237;GO:0008241;GO:0008241;GO:0016020;GO:0016020;GO:0016020;GO:0016021;GO:0016021;	-	-	-	-	-	-
BGIBMGA011789	122.107	190.632	53.5816	0.281074	-1.83098	0.000577017	0.00388613	scaf16	1484611	1486512	+	1362	-	GO:0006508;GO:0006508;GO:0006508;GO:0008233;GO:0008237;GO:0008237;GO:0016020;GO:0016021;GO:0016021;GO:0016787;GO:0016805;GO:0016805;GO:0016805;GO:0031225;GO:0031225;GO:0046872;GO:0046872;	-	-	-	-	-	-
BGIBMGA003272	6.89657	13.7931	0	0	-Inf	0.000580839	0.00390983	scaf73	1143925	1148884	+	411	-	GO:0005576;GO:0005576;GO:0006030;GO:0006030;GO:0008061;GO:0008061;	-	-	-	-	-	101746039
BGIBMGA007329	165.167	224.959	105.375	0.468418	-1.09413	0.000582069	0.00391607	scaf55	2592830	2598025	-	690	-	GO:0005515;	-	-	-	-	-	-
BGIBMGA003210	40.3129	60.7326	19.8932	0.327554	-1.6102	0.000600749	0.00402914	scaf13	6354391	6356823	+	2433	-	GO:0000943;GO:0000943;GO:0003676;GO:0003676;GO:0008270;GO:0008270;GO:0015074;GO:0015074;	-	-	-	-	-	-
BGIBMGA001891	56.4258	86.0948	26.7568	0.310783	-1.68602	0.000604416	0.00404953	scaf28	1733256	1736620	-	1257	-	GO:0004180;GO:0004180;GO:0004181;GO:0004181;GO:0006508;GO:0006508;GO:0008270;GO:0008270;	-	-	-	-	-	-
BGIBMGA002731	69.1961	97.5813	40.811	0.418225	-1.25765	0.000631251	0.0042053	scaf20	5559205	5576395	+	1833	-	-	-	-	-	-	-	-
BGIBMGA010164	1666.8	2500.63	832.971	0.333104	-1.58595	0.000646714	0.00429279	scaf15	1969190	1970416	-	1227	-	-	-	-	-	-	-	-
BGIBMGA003763	366.749	557.203	176.295	0.316394	-1.66021	0.000660683	0.00437203	scaf91	583928	592395	-	813	-	GO:0007165;GO:0007165;	-	-	-	-	-	101738478
BGIBMGA011260	17.4988	30.3392	4.65839	0.153544	-2.70328	0.000697948	0.00459272	scaf12	2655605	2662546	-	2262	-	GO:0004970;GO:0004970;GO:0005234;GO:0005886;GO:0005886;GO:0006811;GO:0016020;GO:0016020;GO:0016020;GO:0016021;GO:0016021;GO:0035235;GO:0098794;	-	-	-	-	-	-
BGIBMGA012706	50.2639	73.793	26.7348	0.362295	-1.46476	0.000728813	0.00477391	scaf69	1322129	1329917	+	2148	-	-	-	-	-	-	-	-
BGIBMGA005790	172.133	288.421	55.8438	0.193619	-2.36871	0.000741964	0.00485021	scaf54	183692	185928	+	321	-	GO:0016020;GO:0016021;GO:0016021;	-	-	-	-	-	-
BGIBMGA006214	377.004	613.83	140.178	0.228366	-2.13058	0.000743916	0.00486051	scaf5	8132104	8137598	+	1731	-	GO:0003824;GO:0003824;GO:0005515;GO:0005576;GO:0005576;GO:0005975;GO:0005975;GO:0006030;GO:0006030;GO:0008061;GO:0008061;	-	-	-	-	-	-
BGIBMGA007365	19.2117	32.6174	5.806	0.178003	-2.49002	0.000755814	0.00493324	scaf55	1158943	1168708	-	1326	-	GO:0004252;GO:0004252;GO:0006508;GO:0006508;	-	-	-	-	-	-
BGIBMGA004399	78.1299	123.675	32.5849	0.263472	-1.92428	0.000758982	0.00495142	scaf37	1633889	1634659	-	771	LP-C12	GO:0005576;GO:0005576;	-	-	-	-	Low molecular 30 kDa lipoprotein PBMHP-12[Source:UniProtKB/Swiss-Prot;Acc:P09335]	-
BGIBMGA014252	12.9518	23.2594	2.6441	0.113679	-3.13697	0.000778224	0.00506926	scaf80	164730	165769	-	177	-	-	-	-	-	-	-	-
BGIBMGA001245	13.7213	24.6295	2.81303	0.114214	-3.13019	0.000807085	0.00522037	scaf1	11089302	11093537	+	1626	-	-	-	-	-	-	-	-
BGIBMGA011535	394.081	647.558	140.604	0.217129	-2.20337	0.000817025	0.00527408	scaf22	1402162	1425993	+	6807	-	GO:0000166;GO:0004672;GO:0004672;GO:0004713;GO:0004713;GO:0004713;GO:0004714;GO:0004714;GO:0004714;GO:0005515;GO:0005524;GO:0005524;GO:0005524;GO:0006468;GO:0006468;GO:0007169;GO:0007169;GO:0016020;GO:0016020;GO:0016020;GO:0016021;GO:0016021;GO:0016301;GO:0016310;GO:0016740;GO:0018108;	-	-	-	-	Tyrosine-protein kinase receptor[Source:UniProtKB/TrEMBL;Acc:H9JPT0]	-
BGIBMGA011573	54.787	78.4178	31.1563	0.397312	-1.33166	0.000876505	0.00560477	scaf22	3585334	3589879	+	291	-	GO:0005515;	-	-	-	-	Kazal-type proteinase inhibitor[Source:UniProtKB/TrEMBL;Acc:Q2F5Q6]	692945
BGIBMGA004474	291.748	404.985	178.512	0.440786	-1.18185	0.000895352	0.00570979	scaf37	2264910	2265779	+	870	-	GO:0005576;GO:0005576;	-	-	-	-	-	101737529
BGIBMGA008285	47.8313	70.3343	25.3283	0.360113	-1.47348	0.000926214	0.00589342	scaf94	1565878	1569752	+	588	-	-	-	-	-	-	-	-
BGIBMGA006249	87.8567	119.431	56.2826	0.471257	-1.08541	0.000973989	0.0061459	scaf88	780442	781520	+	615	-	-	-	-	-	-	-	-
BGIBMGA000858	177.739	251.151	104.328	0.415401	-1.26742	0.000977436	0.00616463	scaf1	14181243	14200450	-	4068	-	GO:0016020;GO:0016021;GO:0016021;	-	-	-	-	-	-
BGIBMGA010093	15.2721	26.8535	3.69073	0.137439	-2.86313	0.00102654	0.00642722	scaf15	6091886	6095317	-	597	-	GO:0005515;	-	-	-	-	-	-
BGIBMGA004043	11.9781	22.4596	1.49649	0.06663	-3.90768	0.00103673	0.00648136	scaf36	361850	367362	-	375	CSP14	-	-	-	-	-	Chemosensory protein 14; Chemosensory protein CSP2[Source:UniProtKB/TrEMBL;Acc:Q3LB92]	692682
BGIBMGA000411	142.255	194.866	89.6442	0.46003	-1.1202	0.00105453	0.00656422	scaf18	2400976	2405022	+	759	-	GO:0005576;GO:0005576;GO:0052689;GO:0052689;	-	-	-	-	-	-
BGIBMGA005789	38.2985	61.913	14.6839	0.237171	-2.076	0.00108091	0.00669938	scaf54	179684	180130	+	333	-	GO:0016020;GO:0016021;GO:0016021;	-	-	-	-	-	-
BGIBMGA013455	41.4772	62.1155	20.8388	0.335485	-1.57568	0.00109772	0.00679052	scaf111	19696	21765	-	474	-	GO:0016020;GO:0016021;GO:0016021;GO:0016021;GO:0055085;GO:0055085;	-	-	-	-	-	-
BGIBMGA005321	294.328	405.058	183.598	0.453263	-1.14158	0.0011818	0.00726537	scaf19	4455585	4457882	-	261	-	-	-	-	-	-	-	-
BGIBMGA000523	22.5096	36.6591	8.36013	0.228051	-2.13257	0.00118505	0.00727841	scaf8	5324831	5326233	-	489	-	-	-	-	-	-	-	101742897
BGIBMGA003115	176.319	238.497	114.141	0.478584	-1.06316	0.00119017	0.00730636	scaf13	2748472	2750388	+	1686	-	GO:0005576;GO:0005576;GO:0006030;GO:0006030;GO:0008061;GO:0008061;	-	-	-	-	-	101740021
BGIBMGA006128	3679.52	5074.81	2284.24	0.450113	-1.15164	0.00126158	0.00768621	scaf5	2307137	2322063	+	1479	-	-	-	-	-	-	-	-
BGIBMGA008320	75.7468	103.549	47.9445	0.463013	-1.11088	0.00135118	0.00817805	scaf2	9044414	9051267	-	1488	-	GO:0016020;GO:0016021;GO:0016021;	-	-	-	-	-	-
BGIBMGA001896	2289.76	4145.28	434.242	0.104756	-3.2549	0.00136519	0.00825511	scaf28	1356902	1383224	-	4161	-	GO:0016020;GO:0016021;GO:0016021;	-	-	-	-	-	-
BGIBMGA006430	61.62	86.3786	36.8613	0.426742	-1.22857	0.00141884	0.00850097	scaf11	850376	854296	-	603	-	-	-	-	-	-	-	-
BGIBMGA000981	85.567	125.182	45.9523	0.367084	-1.44582	0.00143274	0.00856325	scaf1	7187070	7201251	-	3783	-	GO:0003676;GO:0003676;GO:0016020;GO:0016021;GO:0016021;GO:0046872;GO:0046872;	-	-	-	-	-	-
BGIBMGA011679	58.9086	93.7834	24.0338	0.256269	-1.96427	0.00146109	0.00870448	scaf16	1730307	1730833	-	438	-	-	-	-	-	-	-	-
BGIBMGA008241	53.3167	76.017	30.6165	0.402759	-1.31201	0.0014915	0.00886755	scaf94	1472193	1479519	-	1251	-	-	-	-	-	-	-	-
BGIBMGA006138	108.671	157.202	60.1404	0.382568	-1.38621	0.00150489	0.00893244	scaf5	3671943	3673818	+	474	-	GO:0003714;GO:0003714;GO:0004672;GO:0004672;GO:0005524;GO:0005524;GO:0006468;GO:0006468;GO:1903507;	-	-	-	-	-	-
BGIBMGA003639	35.4991	53.4903	17.508	0.327311	-1.61126	0.00151567	0.00897991	scaf9	2171470	2193358	+	3450	-	-	-	-	-	-	-	-
BGIBMGA012135	38.9277	57.6133	20.2421	0.351344	-1.50905	0.00155413	0.0091615	scaf24	4892155	4892994	+	840	-	-	-	-	-	-	-	-
BGIBMGA011699	24.2344	38.6122	9.85662	0.255272	-1.96989	0.00160055	0.00940077	scaf16	1217883	1220354	-	468	-	-	-	-	-	-	-	-
BGIBMGA006691	19.6365	32.3194	6.95362	0.215153	-2.21657	0.00161879	0.00949065	scaf10	2274834	2279533	+	2196	-	GO:0004497;GO:0004497;GO:0004497;GO:0005506;GO:0005506;GO:0005515;GO:0016491;GO:0016705;GO:0016705;GO:0020037;GO:0020037;GO:0046872;GO:0055114;GO:0055114;GO:0055114;	-	-	-	-	-	-
BGIBMGA011683	34.0615	51.6726	16.4503	0.318357	-1.65128	0.00162661	0.0095278	scaf16	1500150	1508105	-	1272	-	GO:0000166;GO:0000166;GO:0016020;GO:0016021;GO:0016021;	-	-	-	-	-	-
BGIBMGA009047	3492.39	5440.19	1544.58	0.28392	-1.81644	0.00170311	0.00992188	scaf63	1785779	1787323	-	585	-	GO:0005515;	-	-	-	-	-	101742927
BGIBMGA002615	685.263	997.266	373.261	0.374284	-1.41779	0.00171616	0.00998436	scaf20	1952727	1965788	-	2001	-	GO:0003677;GO:0003677;GO:0003677;GO:0005634;GO:0005634;GO:0006338;	-	-	-	-	-	-
BGIBMGA014357	66.4172	91.5736	41.2608	0.450575	-1.15016	0.00175113	0.0101194	scaf138	445236	448189	-	678	-	-	-	-	-	-	-	-
BGIBMGA006902	114.886	153.539	76.2327	0.496503	-1.01013	0.00177335	0.0102299	scaf44	2037258	2039687	-	771	-	GO:0003677;GO:0003677;GO:0005634;GO:0005634;GO:0006351;GO:0006351;GO:0006355;GO:0006355;	-	-	-	-	-	-
BGIBMGA011886	34.1477	51.0353	17.2601	0.338199	-1.56406	0.00178978	0.010315	scaf59	2243562	2255912	-	1914	-	GO:0004601;GO:0004601;GO:0006979;GO:0006979;GO:0020037;GO:0020037;GO:0042600;GO:0042600;GO:0055114;GO:0055114;GO:0098869;	-	-	-	-	-	-
BGIBMGA008731	17.9658	29.9457	5.98595	0.199893	-2.3227	0.00180307	0.0103709	scaf90	1452388	1459597	+	954	-	GO:0005576;GO:0005576;GO:0052689;GO:0052689;	-	-	-	-	-	-
BGIBMGA008102	81.9354	110.941	52.9298	0.477098	-1.06764	0.00182693	0.0104823	scaf87	493216	493677	-	462	-	GO:0005515;	-	-	-	-	-	-
BGIBMGA010346	42.9641	62.7941	23.134	0.368411	-1.44061	0.00183357	0.0105157	scaf109	689753	708649	+	906	-	GO:0016020;GO:0016021;GO:0016021;	-	-	-	-	-	-
BGIBMGA012644	60.7024	84.9144	36.4904	0.429732	-1.21849	0.00203119	0.0114807	scaf129	45704	47660	-	378	-	GO:0003924;GO:0003924;GO:0005525;GO:0005525;	-	-	-	-	-	-
BGIBMGA006300	145.62	199.977	91.2637	0.456371	-1.13172	0.00208677	0.0117691	scaf49	588504	588809	+	306	-	-	-	-	-	-	-	-
BGIBMGA012660	311.279	417.481	205.078	0.491226	-1.02554	0.00212328	0.0119385	scaf129	341361	349058	+	1203	-	GO:0003824;GO:0003824;GO:0008152;GO:0016740;GO:0016746;GO:0016747;GO:0016747;	K07508	EC:2.3.1.16	-	-	-	105841738
BGIBMGA014190	12.6016	22.1203	3.08295	0.139372	-2.84299	0.00215105	0.0120683	scaf99	1066995	1078263	+	1296	-	GO:0004553;GO:0004553;GO:0005975;GO:0005975;	-	-	-	-	-	-
BGIBMGA004051	17.6341	29.5523	5.71603	0.193421	-2.37018	0.00217178	0.012174	scaf36	152753	156479	-	1860	-	-	-	-	-	-	-	-
BGIBMGA013766	20.1263	32.5903	7.66238	0.235112	-2.08858	0.00218066	0.0122185	scaf47	122963	126227	-	594	-	GO:0008017;GO:0008017;	-	-	-	-	-	-
BGIBMGA007305	23.5343	37.3919	9.67667	0.258791	-1.95014	0.00221385	0.0123864	scaf92	1427138	1431555	+	1068	-	GO:0016020;GO:0016021;GO:0016021;	-	-	-	-	-	-
BGIBMGA008500	29.8736	48.7429	11.0042	0.225761	-2.14713	0.00222851	0.0124488	scaf2	6164534	6169389	+	1239	-	GO:0016020;GO:0016021;GO:0016021;	-	-	-	-	-	101746716
BGIBMGA003903	18.3104	30.5559	6.06491	0.198486	-2.33289	0.00224779	0.0125348	scaf200	12264	14966	-	621	-	-	-	-	-	-	-	-
BGIBMGA003270	12.4082	22.0933	2.72306	0.123253	-3.02031	0.00226121	0.0126042	scaf73	1092524	1097071	+	804	-	GO:0005576;GO:0005576;GO:0006030;GO:0006030;GO:0008061;GO:0008061;	-	-	-	-	-	101740538
BGIBMGA006288	26.4886	41.3652	11.612	0.280719	-1.8328	0.00228033	0.012681	scaf49	218166	219563	-	1398	-	GO:0016020;GO:0016021;GO:0016021;	-	-	-	-	-	-
BGIBMGA010913	8.42469	15.8817	0.967667	0.0609297	-4.03671	0.00228848	0.0127177	scaf68	1991982	1996457	-	1122	-	GO:0042302;GO:0042302;GO:0042302;	-	-	-	-	-	-
BGIBMGA011547	11.5937	20.7232	2.46415	0.118908	-3.07208	0.00229992	0.0127593	scaf22	1964842	1970133	+	1521	-	-	-	-	-	-	-	-
BGIBMGA001592	52.0414	82.9741	21.1087	0.254401	-1.97482	0.00238057	0.0131558	scaf7	7120141	7123385	+	858	-	GO:0042626;GO:0042626;GO:0055085;	K02149	-	-	-	Vacuolar ATP synthase subunit D[Source:UniProtKB/TrEMBL;Acc:Q1HPT6]	733120
BGIBMGA002293	47.1976	68.1103	26.2849	0.385917	-1.37364	0.00242117	0.0133402	scaf34	435123	441066	+	1515	-	GO:0015929;GO:0015929;GO:0016020;GO:0016021;GO:0016021;	-	-	-	-	-	-
BGIBMGA000884	57.682	80.6289	34.735	0.430801	-1.21491	0.00249223	0.013685	scaf1	12100205	12103811	-	495	-	-	-	-	-	-	-	-
BGIBMGA009936	16.5536	27.8301	5.27718	0.189622	-2.3988	0.00254402	0.0139397	scaf137	211266	213183	-	1605	-	-	-	-	-	-	-	-
BGIBMGA000686	52.8487	80.358	25.3393	0.31533	-1.66507	0.002593	0.014154	scaf8	4610849	4619793	+	1590	-	-	-	-	-	-	-	-
BGIBMGA005320	381.679	511.686	251.672	0.491849	-1.02371	0.0025948	0.0141579	scaf19	4460757	4466564	-	852	-	GO:0004181;GO:0004181;GO:0006508;GO:0006508;GO:0008270;GO:0008270;	-	-	-	-	-	-
BGIBMGA001051	29.0019	44.1865	13.8173	0.312703	-1.67713	0.00263745	0.0143685	scaf1	1998421	1999473	-	207	-	GO:0005515;	-	-	-	-	-	-
BGIBMGA006666	28.9395	44.5116	13.3674	0.300313	-1.73546	0.00265434	0.0144404	scaf10	527986	531316	-	2877	-	-	-	-	-	-	-	-
BGIBMGA013881	26.5178	41.7045	11.3311	0.271699	-1.87992	0.00268385	0.0145759	scaf62	2141146	2142530	+	555	-	-	-	-	-	-	-	-
BGIBMGA007256	42.7803	61.6279	23.9328	0.388343	-1.3646	0.00270818	0.0146834	scaf92	1431640	1433520	-	1230	-	-	-	-	-	-	-	-
BGIBMGA001247	472.849	751.243	194.455	0.258845	-1.94984	0.00271722	0.01472	scaf1	11132588	11141094	+	1473	-	-	-	-	-	-	-	-
BGIBMGA002196	28.2676	43.4267	13.1085	0.301854	-1.72808	0.00272572	0.0147536	scaf64	2180636	2180869	+	234	-	-	-	-	-	-	-	-
BGIBMGA001815	43.9139	63.3772	24.4506	0.385795	-1.37409	0.00275565	0.0148907	scaf35	3305411	3306037	+	627	-	-	-	-	-	-	-	-
BGIBMGA013102	39.3487	69.0997	9.59772	0.138897	-2.84792	0.00295749	0.0158158	scaf4	8971222	8982494	+	1959	-	GO:0016020;GO:0016021;GO:0016021;	-	-	-	-	-	-
BGIBMGA008925	75.7575	102.952	48.5633	0.47171	-1.08403	0.00306712	0.0163276	scaf17	983654	984392	-	480	-	GO:0003824;GO:0003824;GO:0004126;GO:0004126;GO:0004126;GO:0008270;GO:0008270;GO:0008270;GO:0009972;GO:0009972;GO:0016787;GO:0016787;GO:0016787;GO:0046872;	-	-	-	-	-	-
BGIBMGA004921	13.7212	23.5717	3.87067	0.164209	-2.6064	0.0032281	0.0170559	scaf65	1238475	1246376	-	999	-	GO:0003824;GO:0003824;GO:0008152;	-	-	-	-	-	-
BGIBMGA014523	60.7381	88.5755	32.9007	0.371442	-1.42879	0.00325208	0.0171495	scaf357	12706	18604	+	924	-	GO:0003824;GO:0003824;GO:0008152;GO:0016829;GO:0016829;	-	-	-	-	-	-
BGIBMGA006435	66.7036	90.8409	42.5664	0.468582	-1.09363	0.00347489	0.0181686	scaf11	770939	774022	-	483	-	-	-	-	-	-	-	-
BGIBMGA005858	551.236	745.671	356.801	0.478497	-1.06342	0.00348371	0.0182073	scaf125	61840	71902	+	1764	-	GO:0005515;GO:0016020;GO:0016021;GO:0016021;	-	-	-	-	-	-
BGIBMGA001013	25.5825	39.643	11.522	0.290645	-1.78267	0.00351577	0.01836	scaf1	5592649	5596393	-	1083	-	GO:0000166;GO:0004672;GO:0004672;GO:0004674;GO:0004674;GO:0005524;GO:0005524;GO:0005524;GO:0006468;GO:0006468;	-	-	-	-	-	-
BGIBMGA008496	49.2698	69.0598	29.4799	0.426875	-1.22812	0.00353314	0.0184283	scaf2	5548624	5561095	+	1917	-	-	-	-	-	-	-	-
BGIBMGA013431	169.721	240.718	98.7241	0.410124	-1.28587	0.00354792	0.0184979	scaf111	709434	732462	-	1677	-	GO:0005515;	-	-	-	-	-	-
BGIBMGA009394	19.3059	30.9494	7.66238	0.247578	-2.01405	0.00355656	0.0185355	scaf81	864953	866424	-	705	-	-	-	-	-	-	-	-
BGIBMGA000378	21.1097	33.9604	8.25915	0.2432	-2.03979	0.00366157	0.0189907	scaf18	987747	1017562	+	2340	-	-	-	-	-	-	-	-
BGIBMGA008877	7.94076	14.8239	1.05764	0.071347	-3.809	0.0036738	0.0190236	scaf17	3819165	3821311	-	690	-	-	-	-	-	-	-	-
BGIBMGA009452	19.0467	35.3703	2.72306	0.0769871	-3.69924	0.00369075	0.0190777	scaf40	1945005	1971694	-	3939	-	GO:0000166;GO:0005524;GO:0005524;GO:0005524;GO:0016020;GO:0016021;GO:0016021;GO:0016021;GO:0016887;GO:0016887;GO:0042626;GO:0042626;GO:0055085;GO:0055085;	-	-	-	-	-	-
BGIBMGA005090	10.8215	19.4487	2.19424	0.112822	-3.14788	0.00374283	0.019305	scaf32	449268	449922	-	258	-	GO:0004252;GO:0004252;GO:0006508;GO:0006508;	-	-	-	-	-	-
BGIBMGA006694	70.6148	97.1337	44.0959	0.453971	-1.13933	0.00374311	0.019305	scaf10	2381995	2392515	+	2052	-	GO:0005515;GO:0005576;GO:0005576;	-	-	-	-	-	-
BGIBMGA006692	55.0446	76.2208	33.8684	0.444345	-1.17025	0.00379544	0.0195203	scaf10	2281033	2294549	+	2325	-	GO:0005515;	-	-	-	-	Hemocytin [Source:UniProtKB/Swiss-Prot;Acc:P98092]	-
BGIBMGA003603	8.96275	16.519	1.40652	0.0851454	-3.55393	0.00385749	0.0198078	scaf9	445601	445864	+	264	-	-	-	-	-	-	-	-
BGIBMGA007253	44.0557	63.323	24.7885	0.391461	-1.35306	0.00388418	0.0199254	scaf92	1506236	1527876	-	1161	-	-	-	-	-	-	-	-
BGIBMGA007217	58.441	80.5605	36.3215	0.45086	-1.14925	0.00402695	0.020539	scaf175	124185	140466	-	2718	-	GO:0000166;GO:0005524;GO:0005524;GO:0005524;GO:0016020;GO:0016021;GO:0016021;GO:0016021;GO:0016887;GO:0016887;GO:0042626;GO:0042626;GO:0055085;GO:0055085;	-	-	-	-	-	-
BGIBMGA005982	15.1067	25.3751	4.83834	0.190673	-2.39083	0.00411641	0.0208768	scaf5	5722928	5727338	-	1770	-	GO:0005509;GO:0005509;	-	-	-	-	-	-
BGIBMGA006949	21.6609	34.3538	8.96791	0.261045	-1.93763	0.00412827	0.0209052	scaf44	1734512	1742346	+	246	-	-	-	-	-	-	-	-
BGIBMGA006313	16.7471	27.3282	6.16589	0.225624	-2.14801	0.00417992	0.0210941	scaf49	1317110	1320058	+	1980	-	GO:0000166;GO:0005524;GO:0005524;	-	-	-	-	-	-
BGIBMGA002748	20.8946	33.3502	8.43909	0.253045	-1.98253	0.00422781	0.0213025	scaf117	469424	486163	+	4560	-	GO:0005509;GO:0005509;GO:0005886;GO:0005886;GO:0007155;GO:0007155;GO:0007156;GO:0007156;GO:0016020;GO:0016020;GO:0016020;GO:0016021;GO:0016021;	-	-	-	-	-	-
BGIBMGA013639	33.8587	49.9504	17.7669	0.355691	-1.49131	0.00437164	0.0218402	scaf78	1148852	1159587	+	1095	-	GO:0016020;GO:0016021;GO:0016021;	-	-	-	-	-	-
BGIBMGA011352	5.09954	10.1991	0	0	-Inf	0.00442612	0.0220605	scaf12	2822891	2827885	+	699	-	-	-	-	-	-	-	-
BGIBMGA009369	45.146	63.9061	26.3859	0.412886	-1.27618	0.00467438	0.0231282	scaf53	1490029	1495432	+	753	-	-	-	-	-	-	-	101738382
BGIBMGA011600	81.6331	113.735	49.531	0.435494	-1.19928	0.00472507	0.0233521	scaf16	6226080	6232979	-	1383	-	GO:0003824;GO:0003824;GO:0008483;GO:0008483;GO:0030170;GO:0030170;	-	-	-	-	-	-
BGIBMGA005848	42.3429	59.8644	24.8215	0.414629	-1.27011	0.00480877	0.0237113	scaf125	96637	99746	-	537	-	GO:0016020;GO:0016021;GO:0016021;GO:0016021;GO:0033227;GO:0033227;GO:0051033;GO:0051033;	-	-	-	-	-	-
BGIBMGA011339	13.9856	23.5717	4.39949	0.186643	-2.42164	0.00486342	0.0239533	scaf12	2433384	2433545	+	162	-	-	-	-	-	-	-	-
BGIBMGA009892	19.1654	30.9494	7.38145	0.238501	-2.06793	0.00508026	0.0248651	scaf51	1257344	1261323	+	1803	-	GO:0005576;GO:0005576;GO:0006030;GO:0006030;GO:0008061;GO:0008061;	-	-	-	-	-	-
BGIBMGA003688	36.1036	52.595	19.6123	0.372892	-1.42317	0.00508053	0.0248651	scaf9	4264215	4267947	+	1050	-	GO:0004521;GO:0004521;GO:0090502;	K14648	EC:3.1.-.-	-	-	-	101740108
BGIBMGA014460	15.5001	25.6331	5.36716	0.209384	-2.25578	0.00509256	0.0249107	scaf266	47052	48047	-	996	-	-	-	-	-	-	-	-
BGIBMGA013953	15.4465	25.7957	5.09724	0.197601	-2.33934	0.0051411	0.025091	scaf29	347088	347276	+	189	-	-	-	-	-	-	-	-
BGIBMGA012362	59.01	80.3709	37.6491	0.468441	-1.09406	0.00516955	0.0251637	scaf26	4546285	4549179	+	1551	-	-	-	-	-	-	-	-
BGIBMGA004238	26.4583	40.9446	11.9719	0.292393	-1.77402	0.00518199	0.0251954	scaf150	286689	290047	-	1794	-	-	-	-	-	-	-	-
BGIBMGA009585	63.9443	86.189	41.6997	0.483817	-1.04747	0.0051998	0.0252629	scaf103	556802	566460	-	1323	-	-	-	-	-	-	-	-
BGIBMGA007347	24.9154	38.2188	11.612	0.30383	-1.71866	0.00523692	0.0254144	scaf55	1685538	1703809	-	3069	-	GO:0004984;GO:0004984;GO:0005549;GO:0005549;GO:0007165;GO:0007608;GO:0007608;GO:0007608;GO:0016020;GO:0016020;GO:0016020;GO:0016021;GO:0016021;GO:0050896;GO:0050911;	-	-	-	-	-	-
BGIBMGA006021	16.8667	27.9384	5.79499	0.20742	-2.26937	0.00526619	0.0255374	scaf5	2336808	2342044	-	594	-	GO:0016020;GO:0016021;GO:0016021;GO:0016021;	-	-	-	-	-	-
BGIBMGA005482	74.4311	102.504	46.3581	0.452256	-1.14479	0.00527828	0.0255691	scaf19	4323128	4327090	+	1665	-	GO:0004930;GO:0004930;GO:0007186;GO:0007186;GO:0016020;GO:0016021;GO:0016021;GO:0016021;	-	-	-	-	-	-
BGIBMGA006160	64.405	86.3116	42.4984	0.492384	-1.02214	0.00537793	0.0259331	scaf5	5218232	5224116	+	1038	-	GO:0003824;GO:0003824;GO:0050662;GO:0050662;	-	-	-	-	-	-
BGIBMGA013954	21.3525	33.3773	9.3278	0.279466	-1.83926	0.00538685	0.0259567	scaf29	354294	357060	+	1086	-	GO:0017154;GO:0017154;GO:0071526;GO:0071526;	-	-	-	-	-	-
BGIBMGA008908	28.2854	42.3147	14.2561	0.336907	-1.56958	0.00549332	0.0263909	scaf17	1847596	1850186	-	597	-	-	-	-	-	-	-	-
BGIBMGA014366	53.6275	78.7428	28.5122	0.362093	-1.46557	0.00564011	0.0269655	scaf155	240462	244232	-	1053	-	GO:0003341;GO:0003341;GO:0003777;GO:0003777;GO:0005858;GO:0005858;GO:0007018;GO:0007018;GO:0016887;GO:0016887;	-	-	-	-	-	-
BGIBMGA011739	19.852	31.6137	8.09021	0.255908	-1.9663	0.00565083	0.0270068	scaf16	157349	163633	-	891	-	GO:0006887;GO:0006887;GO:0016020;GO:0016020;GO:0017137;GO:0017137;GO:0048786;GO:0048786;	-	-	-	-	-	-
BGIBMGA005866	7.5202	13.9828	1.05764	0.0756389	-3.72473	0.00574412	0.0273918	scaf125	317624	321899	+	1239	-	GO:0005515;	-	-	-	-	-	-
BGIBMGA008340	4.88926	9.77852	0	0	-Inf	0.00577558	0.0275113	scaf2	5742593	5742883	-	291	-	-	-	-	-	-	-	-
BGIBMGA013746	43.2901	61.0719	25.5082	0.417675	-1.25955	0.005783	0.0275365	scaf47	2387909	2391158	-	873	-	GO:0004252;GO:0006508;	-	-	-	-	-	-
BGIBMGA005127	17.6969	28.4402	6.95362	0.244499	-2.0321	0.00583708	0.027753	scaf32	1720442	1722877	+	705	-	GO:0003700;GO:0046983;GO:0046983;	-	-	-	-	-	101741094
BGIBMGA006457	14.5686	24.2089	4.92831	0.203574	-2.29637	0.00586449	0.0278628	scaf11	927218	929441	+	1755	-	-	-	-	-	-	-	-
BGIBMGA008482	8.53735	15.4882	1.58646	0.10243	-3.28729	0.00589142	0.0279764	scaf2	4459291	4463978	+	606	-	GO:0003677;GO:0003677;GO:0003677;GO:0005634;GO:0005634;GO:0006355;GO:0006355;GO:0043565;GO:0043565;	K09339	-	-	-	-	101744413
BGIBMGA009584	60.9857	82.2969	39.6744	0.482088	-1.05263	0.00593432	0.0281427	scaf103	570155	571126	-	294	-	-	-	-	-	-	-	-
BGIBMGA007680	16.0875	26.1891	5.98595	0.228566	-2.12932	0.00597472	0.0282824	scaf3	5611359	5621357	-	3741	-	-	-	-	-	-	-	-
BGIBMGA012923	11.1623	19.4216	2.903	0.149473	-2.74204	0.0060506	0.0285578	scaf4	373656	379075	+	894	-	GO:0004252;GO:0004252;GO:0006508;GO:0006508;	-	-	-	-	-	-
BGIBMGA004556	57.438	77.8347	37.0413	0.475897	-1.07128	0.00623585	0.0293035	scaf48	1466647	1474004	-	900	-	-	-	-	-	-	-	-
BGIBMGA014139	32.6349	48.1327	17.1371	0.356038	-1.4899	0.0070695	0.0324875	scaf99	1266329	1282590	-	1848	-	GO:0000166;GO:0000166;GO:0009166;GO:0009166;GO:0016787;GO:0016787;GO:0016787;	-	-	-	-	-	-
BGIBMGA004060	61.6187	82.6633	40.5741	0.490835	-1.02669	0.00724903	0.0332061	scaf36	111438	114701	+	2967	-	-	-	-	-	-	-	-
BGIBMGA001757	20.1614	31.6137	8.70901	0.275482	-1.85997	0.00733889	0.03357	scaf35	1408117	1411581	+	912	-	-	-	-	-	-	-	101735363
BGIBMGA013113	40.8119	60.5829	21.0408	0.347306	-1.52572	0.00738123	0.0337039	scaf124	567981	581743	-	1359	-	-	-	-	-	-	-	-
BGIBMGA002597	259.148	374.157	144.138	0.385235	-1.37619	0.00750214	0.0341353	scaf20	2857847	2864361	-	1548	-	GO:0004672;GO:0004672;GO:0005524;GO:0005524;GO:0006468;GO:0006468;GO:0016020;GO:0016021;GO:0016021;	-	-	-	-	-	-
BGIBMGA001439	4.63834	9.27669	0	0	-Inf	0.00769992	0.0348875	scaf7	4109983	4110570	-	588	-	-	-	-	-	-	-	-
BGIBMGA012011	18.0107	28.359	7.66238	0.270192	-1.88794	0.00777972	0.0351504	scaf141	39912	44334	+	1389	-	GO:0000166;GO:0004672;GO:0004672;GO:0004674;GO:0004674;GO:0005524;GO:0005524;GO:0005524;GO:0006468;GO:0006468;	-	-	-	-	-	-
BGIBMGA004322	50.2017	68.6392	31.7641	0.462769	-1.11164	0.00784112	0.0353782	scaf79	368911	371050	+	1314	-	-	-	-	-	-	-	-
BGIBMGA010640	26.0977	39.087	13.1085	0.335367	-1.57619	0.00785954	0.035449	scaf84	203419	212355	-	1272	BMO.2494	GO:0006629;GO:0006629;GO:0016042;GO:0016042;GO:0016787;GO:0016788;GO:0016788;	-	-	-	-	Lipase [Source:UniProtKB/TrEMBL;Acc:H9JM87]"	101737626
BGIBMGA005143	21.8851	34.0145	9.75563	0.286808	-1.80184	0.00790549	0.0355692	scaf32	2645290	2646009	+	720	-	GO:0016020;GO:0016021;GO:0016021;	-	-	-	-	-	-
BGIBMGA000705	25.5434	38.3271	12.7596	0.332914	-1.58678	0.00807083	0.0361869	scaf8	5404596	5432831	+	3186	-	GO:0006813;GO:0006813;GO:0016020;GO:0016020;	-	-	-	-	-	-
BGIBMGA013289	51.4761	70.3215	32.6308	0.464023	-1.10773	0.00816114	0.0364652	scaf71	1772969	1777053	-	558	-	GO:0016020;GO:0016021;GO:0016021;	-	-	-	-	-	-
BGIBMGA010275	38.2955	54.1547	22.4363	0.4143	-1.27125	0.00828481	0.0369155	scaf15	5261785	5270500	+	1218	-	GO:0016020;GO:0016021;GO:0016021;	-	-	-	-	-	-
BGIBMGA006390	31.6124	46.1667	17.0581	0.369489	-1.43639	0.00835477	0.0371527	scaf11	3114484	3114672	-	189	-	GO:0003677;GO:0003677;GO:0003677;GO:0005634;GO:0005634;GO:0006355;GO:0006355;GO:0043565;GO:0043565;	-	-	-	-	-	-
BGIBMGA012031	15.5141	25.4022	5.62606	0.221479	-2.17476	0.00837069	0.0371912	scaf24	3754558	3758752	-	1623	AE13	-	-	-	-	-	Carboxylesterase[Source:UniProtKB/TrEMBL;Acc:Q2F622]	692864
BGIBMGA002903	51.3494	69.6971	33.0017	0.473502	-1.07856	0.00840278	0.0373123	scaf30	2092704	2099407	+	903	-	GO:0034464;GO:0034464;GO:1905515;GO:1905515;	-	-	-	-	-	-
BGIBMGA010865	13.9633	23.1782	4.74836	0.204864	-2.28726	0.00840981	0.0373306	scaf61	1049646	1056344	-	723	-	GO:0005506;GO:0005506;GO:0016705;GO:0016705;GO:0020037;GO:0020037;GO:0055114;GO:0055114;	-	-	-	-	-	-
BGIBMGA005711	29.7804	43.5493	16.0115	0.367664	-1.44354	0.0085578	0.0379223	scaf143	367571	373532	+	1698	-	GO:0016614;GO:0016614;GO:0050660;GO:0050660;GO:0055114;GO:0055114;	-	-	-	-	-	-
BGIBMGA002852	456.298	801.415	111.181	0.138731	-2.84964	0.00865321	0.0382324	scaf30	77179	80890	+	1440	-	GO:0016020;GO:0016021;GO:0016021;GO:0016021;GO:0022857;GO:0022857;GO:0055085;GO:0055085;	-	-	-	-	-	101747196
BGIBMGA009084	41.0677	57.5049	24.6305	0.42832	-1.22324	0.00871188	0.0384204	scaf63	39115	45321	+	1245	-	GO:0005515;	-	-	-	-	-	-
BGIBMGA009511	36.1621	51.5643	20.7599	0.402602	-1.31257	0.00882097	0.0387558	scaf40	1860073	1861245	+	489	-	-	-	-	-	-	-	-
BGIBMGA006901	67.2689	92.7811	41.7566	0.450055	-1.15183	0.00882969	0.0387677	scaf44	2271815	2275763	-	753	-	-	K14443	-	-	-	-	101744020
BGIBMGA007713	21.4387	34.7872	8.09021	0.232563	-2.10431	0.0090252	0.0394918	scaf3	2243267	2252679	-	297	-	GO:0016020;GO:0016021;GO:0016021;	-	-	-	-	-	-
BGIBMGA006569	39.092	55.05	23.134	0.420237	-1.25072	0.0092559	0.0404053	scaf10	6025064	6035977	-	1665	-	GO:0006629;GO:0006629;GO:0016020;GO:0016021;GO:0016021;GO:0016491;GO:0055114;GO:0080019;GO:0080019;GO:0102965;GO:0102965;	-	-	-	-	-	-
BGIBMGA009272	23.1944	34.8557	11.5331	0.33088	-1.59562	0.00926401	0.040427	scaf38	1644728	1670215	+	3525	-	GO:0005216;GO:0005216;GO:0005262;GO:0005262;GO:0005515;GO:0006811;GO:0006811;GO:0006811;GO:0016020;GO:0016020;GO:0016020;GO:0016021;GO:0016021;GO:0016021;GO:0055085;GO:0055085;GO:0070588;GO:0070588;	-	-	-	-	-	-
BGIBMGA004894	20.5607	31.6137	9.50774	0.300747	-1.73338	0.00930009	0.0405297	scaf144	98463	109641	+	1641	-	-	-	-	-	-	-	-
BGIBMGA010216	64.1504	86.0264	42.2744	0.491412	-1.025	0.00940435	0.0409362	scaf15	2101934	2108675	+	1509	-	GO:0005615;GO:0005615;	-	-	-	-	-	-
BGIBMGA010081	16.845	26.8264	6.86364	0.255854	-1.96661	0.00944944	0.0410652	scaf45	1947609	1948571	+	963	-	GO:0016020;GO:0016021;GO:0016021;	-	-	-	-	-	101737011
BGIBMGA007668	7.98618	14.5658	1.40652	0.0965625	-3.37239	0.00950503	0.0412695	scaf3	6492346	6495310	-	525	-	GO:0004252;GO:0004252;GO:0006508;GO:0006508;	-	-	-	-	-	-
BGIBMGA001127	7.91846	14.4304	1.40652	0.0974688	-3.35892	0.0095115	0.0412814	scaf1	4516784	4520031	+	510	-	GO:0000139;	-	-	-	-	-	-
BGIBMGA014364	16.0967	25.7686	6.4248	0.249327	-2.00389	0.0096003	0.0415992	scaf155	259463	278689	-	3720	-	GO:0003341;GO:0003341;GO:0003777;GO:0003777;GO:0005858;GO:0005858;GO:0007018;GO:0007018;GO:0016887;GO:0016887;	-	-	-	-	-	-
BGIBMGA011119	39.6886	55.7143	23.6629	0.424718	-1.23542	0.0096561	0.0417848	scaf95	583494	625777	-	5952	-	-	-	-	-	-	-	-
BGIBMGA000530	33.5502	47.916	19.1844	0.400376	-1.32057	0.00971151	0.0419824	scaf8	4928410	4941126	-	1086	-	GO:0016020;GO:0016021;GO:0016021;GO:0016021;	-	-	-	-	-	-
BGIBMGA000847	24.3279	36.6049	12.0509	0.329214	-1.6029	0.00978606	0.0422339	scaf1	14983858	14984172	-	315	-	-	-	-	-	-	-	-
BGIBMGA005808	4.41452	8.82904	0	0	-Inf	0.0101229	0.0434839	scaf54	903756	910331	+	969	-	GO:0016491;GO:0016491;GO:0055114;	-	-	-	-	-	101739814
BGIBMGA005025	4.38743	8.77486	0	0	-Inf	0.0102663	0.0439483	scaf32	3673368	3674279	-	627	-	-	-	-	-	-	-	-
BGIBMGA013797	680.384	1016.51	344.255	0.338662	-1.56208	0.0105349	0.0448505	scaf47	2281147	2289247	+	837	-	GO:0004252;GO:0004252;GO:0006508;GO:0006508;	-	-	-	-	-	-
BGIBMGA003512	28.3165	46.1796	10.4534	0.226364	-2.14329	0.0106602	0.0453095	scaf9	4068774	4074436	-	1509	-	GO:0004553;GO:0004553;GO:0005975;GO:0005975;GO:0008152;GO:0016787;GO:0016798;	-	-	-	-	-	-
BGIBMGA012861	8.6668	15.4882	1.84536	0.119146	-3.0692	0.0110441	0.0467025	scaf4	3182622	3188724	-	633	BMORCPH30	-	-	-	-	-	Putative cuticle protein[Source:UniProtKB/TrEMBL;Acc:C0H6I7]	100379466
BGIBMGA007933	45.3203	62.3193	28.3213	0.454454	-1.13779	0.0110717	0.0467657	scaf3	7800998	7808309	+	1716	-	-	-	-	-	-	-	-
BGIBMGA007678	39.8674	55.633	24.1017	0.433227	-1.20681	0.0112197	0.0472981	scaf3	5719200	5731481	-	873	-	GO:0005576;GO:0005576;GO:0006030;GO:0006030;GO:0008061;GO:0008061;	-	-	-	-	-	-
BGIBMGA002194	15.1831	24.2902	6.07592	0.250139	-1.9992	0.0112425	0.0473632	scaf64	2165894	2166785	+	369	-	-	-	-	-	-	-	-
BGIBMGA002506	31.2293	45.0405	17.418	0.386719	-1.37064	0.011447	0.0479895	scaf14	3187299	3194489	+	918	-	GO:0004930;GO:0004930;GO:0004930;GO:0004995;GO:0004995;GO:0005886;GO:0005886;GO:0007165;GO:0007186;GO:0007186;GO:0007186;GO:0007217;GO:0016020;GO:0016021;GO:0016021;GO:0016021;	-	-	-	-	-	-
BGIBMGA012099	12.7716	21.1438	4.39949	0.208075	-2.26483	0.0115826	0.0484779	scaf24	2363290	2368979	+	2061	-	GO:0004672;GO:0004672;GO:0005524;GO:0005524;GO:0006468;GO:0006468;	K08858	EC:2.7.11.1	-	-	-	101740891
BGIBMGA006366	98.7452	133.848	63.6421	0.475479	-1.07255	0.0119343	0.0496769	scaf11	4969425	4970116	-	312	-	-	-	-	-	-	-	-
BGIBMGA006746	9.07541	16.1255	2.02531	0.125597	-2.99313	0.0122224	0.0506642	scaf10	4842377	4844106	+	801	-	GO:0005507;GO:0005507;GO:0016491;GO:0016491;GO:0016491;GO:0046872;GO:0055114;GO:0055114;GO:0055114;	-	-	-	-	-	105842235
BGIBMGA008598	42.5827	58.7795	26.3859	0.448897	-1.15554	0.0125737	0.0517547	scaf85	441603	442907	+	1305	-	-	-	-	-	-	-	101738207
BGIBMGA003817	45.3375	62.4548	28.2203	0.451851	-1.14608	0.0127395	0.0522704	scaf107	689681	704396	-	1707	-	GO:0008152;GO:0016740;GO:0016757;GO:0016758;GO:0016758;	-	-	-	-	-	-
BGIBMGA012150	39.9025	55.7143	24.0907	0.432397	-1.20957	0.0130701	0.0534571	scaf75	1120735	1122997	-	264	-	-	-	-	-	-	-	-
BGIBMGA008553	43.5585	62.6444	24.4726	0.390659	-1.35602	0.0132177	0.053889	scaf2	10249139	10251304	+	1896	-	-	-	-	-	-	-	-
BGIBMGA005602	21.0744	31.7634	10.3854	0.326962	-1.6128	0.0133136	0.0541953	scaf33	97098	102123	+	1482	-	GO:0004553;GO:0004553;GO:0005975;GO:0005975;	-	-	-	-	-	-
BGIBMGA002956	14.8243	23.8425	5.806	0.243515	-2.03792	0.0133904	0.0544391	scaf13	6226651	6242728	-	3633	-	GO:0003824;GO:0003824;GO:0005515;	-	-	-	-	-	-
BGIBMGA002758	20.4165	30.9765	9.85662	0.318197	-1.65201	0.0137627	0.0556197	scaf146	42278	48246	-	441	-	GO:0005509;GO:0005509;	-	-	-	-	-	-
BGIBMGA006513	70.4635	94.2311	46.6959	0.495547	-1.01291	0.0143678	0.0576142	scaf11	5150171	5153525	+	690	-	-	-	-	-	-	-	-
BGIBMGA005215	9.2542	16.0442	2.46415	0.153585	-2.70289	0.014517	0.058104	scaf119	585937	588319	+	918	-	-	K19755	-	-	-	-	101740871
BGIBMGA005632	13.7365	25.5376	1.93533	0.0757836	-3.72197	0.014573	0.0582738	scaf33	1682406	1695697	+	2430	-	GO:0035082;GO:0035082;	-	-	-	-	-	-
BGIBMGA011203	7.44808	13.3997	1.49649	0.111681	-3.16254	0.0145814	0.0582796	scaf12	4916587	4917564	-	978	-	-	-	-	-	-	-	-
BGIBMGA012756	19.4433	29.9186	8.96791	0.299743	-1.7382	0.0146854	0.0585601	scaf4	8907164	8924248	-	1644	-	GO:0016020;GO:0016021;GO:0016021;	-	-	-	-	-	-
BGIBMGA014570	9.18648	15.9088	2.46415	0.154893	-2.69066	0.014752	0.0588076	scaf497	4366	6617	+	600	-	-	-	-	-	-	-	-
BGIBMGA005122	6.503	11.9484	1.05764	0.0885176	-3.49789	0.0147647	0.05884	scaf32	1529987	1531912	+	456	-	GO:0005515;	-	-	-	-	-	-
BGIBMGA006671	16.1373	25.3209	6.95362	0.274619	-1.86449	0.0148279	0.0590189	scaf10	17996	18542	-	186	-	GO:0016020;GO:0016021;GO:0016021;	-	-	-	-	-	-
BGIBMGA012284	17.5591	32.3052	2.81303	0.0870767	-3.52157	0.0150365	0.0595735	scaf26	866104	868152	-	1053	-	-	-	-	-	-	-	-
BGIBMGA003258	337.181	496.986	177.375	0.356901	-1.4864	0.0150678	0.0596278	scaf73	474170	481189	+	1299	-	GO:0004672;GO:0004672;GO:0006468;	-	-	-	-	-	-
BGIBMGA001314	9.08296	15.8817	2.28421	0.143826	-2.7976	0.0151211	0.0597438	scaf139	53892	61073	-	567	-	GO:0016020;GO:0016021;GO:0016021;	-	-	-	-	-	-
BGIBMGA007290	22.5656	33.8791	11.2521	0.332126	-1.5902	0.0153924	0.0605931	scaf92	750400	755554	+	1083	-	GO:0004970;GO:0004970;GO:0016020;GO:0016020;GO:0016020;GO:0016021;GO:0016021;GO:0035235;	-	-	-	-	-	-
BGIBMGA002286	25.3899	37.0526	13.7273	0.370481	-1.43253	0.0156535	0.0613585	scaf34	442509	450494	-	3354	-	GO:0005267;GO:0005267;GO:0006811;GO:0016020;GO:0016020;GO:0016020;GO:0016021;GO:0016021;GO:0071805;GO:0071805;	-	-	-	-	-	-
BGIBMGA007370	26.8156	38.6664	14.9649	0.387025	-1.3695	0.0156621	0.0613737	scaf55	701724	702807	-	357	-	-	-	-	-	-	-	-
BGIBMGA005730	10.7373	18.1328	3.34185	0.184298	-2.43988	0.0159859	0.0624528	scaf123	266128	267333	-	840	-	-	K00079	-	-	-	-	101738709
BGIBMGA001263	46.9853	67.9336	26.037	0.383272	-1.38356	0.016273	0.0634017	scaf1	11752912	11753881	+	885	-	-	-	-	-	-	-	-
BGIBMGA001059	12.9998	20.9813	5.01828	0.239179	-2.06384	0.0162894	0.0634274	scaf1	1716839	1725401	-	1185	-	-	-	-	-	-	-	-
BGIBMGA006266	12.1934	20.1672	4.21955	0.209228	-2.25685	0.0165042	0.0640705	scaf49	1971994	1978294	-	1239	-	-	-	-	-	-	-	101741944
BGIBMGA011706	21.3301	31.926	10.7343	0.336225	-1.5725	0.0165458	0.0642008	scaf16	995181	1000286	-	648	-	-	-	-	-	-	-	-
BGIBMGA005165	10.5526	17.9432	3.16191	0.176217	-2.50457	0.0165843	0.0642655	scaf32	3750166	3759582	+	1038	-	-	-	-	-	-	-	101738155
BGIBMGA013934	23.4757	42.1921	4.75938	0.112803	-3.14813	0.0166272	0.0643818	scaf29	490599	499580	-	1503	-	-	-	-	-	-	-	-
BGIBMGA012454	16.6661	25.8498	7.48244	0.289458	-1.78858	0.0166309	0.0643818	scaf56	2200695	2204048	-	501	-	-	-	-	-	-	-	105841316
BGIBMGA002942	73.0453	108.959	37.1313	0.340781	-1.55309	0.0166574	0.0644134	scaf30	4393941	4396063	+	813	-	-	-	-	-	-	-	-
BGIBMGA008657	61.6199	82.7446	40.4951	0.489399	-1.03092	0.0171051	0.0658456	scaf132	575927	576373	+	375	-	-	-	-	-	-	-	-
BGIBMGA009061	26.899	39.1141	14.6839	0.375413	-1.41345	0.0171782	0.0659686	scaf63	1280754	1282624	-	1764	-	-	-	-	-	-	-	-
BGIBMGA002157	94.6492	134.253	55.045	0.410009	-1.28627	0.0171823	0.0659686	scaf64	2100171	2102219	-	1788	-	GO:0003700;GO:0003700;GO:0006355;GO:0006355;GO:0008270;GO:0008270;GO:0043565;GO:0043565;GO:0046872;	-	-	-	-	-	-
BGIBMGA002441	45.1717	61.2344	29.109	0.47537	-1.07288	0.0172677	0.0662176	scaf14	774674	774946	-	273	-	-	-	-	-	-	-	-
BGIBMGA008973	15.7601	24.6566	6.86364	0.27837	-1.84493	0.0175037	0.0669435	scaf17	2154418	2160393	+	1098	-	GO:0004181;GO:0004181;GO:0006508;GO:0006508;GO:0008270;GO:0008270;	-	-	-	-	-	-
BGIBMGA001857	11.5426	19.3945	3.69073	0.190297	-2.39367	0.0175682	0.0671503	scaf28	3117016	3121153	-	3831	-	GO:0005576;GO:0005576;GO:0006030;GO:0006030;GO:0008061;GO:0008061;	-	-	-	-	-	-
BGIBMGA007369	20.4333	30.841	10.0255	0.325072	-1.62117	0.0175848	0.0671942	scaf55	742868	745353	-	618	-	GO:0003677;GO:0003677;GO:0005634;GO:0005634;GO:0006351;GO:0006351;GO:0006355;GO:0006355;	-	-	-	-	-	-
BGIBMGA011911	53.0713	75.7062	30.4365	0.402035	-1.31461	0.0176273	0.0673164	scaf59	1641564	1648511	-	2787	-	GO:0005515;GO:0016020;GO:0016021;GO:0016021;	-	-	-	-	-	-
BGIBMGA008110	94.5253	147.395	41.6556	0.282612	-1.8231	0.0176857	0.0674997	scaf87	904444	912213	+	1551	-	-	-	-	-	-	-	101735869
BGIBMGA008794	49.5425	66.1843	32.9007	0.497107	-1.00837	0.0178392	0.0680253	scaf115	680170	687159	+	1518	-	GO:0003676;GO:0003676;	-	-	-	-	-	-
BGIBMGA002911	23.262	33.9333	12.5907	0.371043	-1.43034	0.0180987	0.0688926	scaf30	2539725	2540536	+	189	-	-	-	-	-	-	-	-
BGIBMGA011712	5.15367	9.77852	0.52882	0.0540798	-4.20877	0.0183806	0.0698009	scaf16	838151	844346	-	999	-	GO:0006508;GO:0008242;GO:0008242;GO:0016787;GO:0016787;GO:0016787;GO:0034722;GO:0034722;	-	-	-	-	-	-
BGIBMGA006695	5.12223	9.80561	0.438848	0.0447548	-4.48181	0.0186136	0.0705196	scaf10	2408251	2409498	+	258	-	-	-	-	-	-	-	-
BGIBMGA009880	31.8901	48.0386	15.7416	0.327686	-1.60961	0.0187381	0.070833	scaf51	590759	591894	+	174	-	-	-	-	-	-	-	-
BGIBMGA003944	12.8393	20.7503	4.92831	0.237505	-2.07397	0.018916	0.0713511	scaf105	332199	345180	-	1596	CYP9A19	GO:0004497;GO:0004497;GO:0005506;GO:0005506;GO:0016491;GO:0016705;GO:0016705;GO:0020037;GO:0020037;GO:0046872;GO:0055114;GO:0055114;GO:0055114;	K15003	EC:1.14.-.-	-	-	Cytochrome P450[Source:UniProtKB/TrEMBL;Acc:A4UU25]	100126178
BGIBMGA003369	9.65246	16.4919	2.81303	0.17057	-2.55156	0.0189396	0.0714105	scaf42	353394	369139	-	2442	-	GO:0005216;GO:0005216;GO:0005515;GO:0006811;GO:0006811;GO:0006811;GO:0016020;GO:0016020;GO:0016020;GO:0016021;GO:0016021;GO:0016021;GO:0034220;GO:0055085;GO:0055085;	-	-	-	-	-	-
BGIBMGA013274	25.5281	36.8901	14.1661	0.38401	-1.38079	0.0189768	0.0715178	scaf39	3170575	3189374	+	2082	-	GO:0005267;GO:0005267;GO:0006811;GO:0016020;GO:0016020;GO:0016020;GO:0016021;GO:0016021;GO:0071805;GO:0071805;	-	-	-	-	-	-
BGIBMGA000152	20.9622	31.3699	10.5544	0.336448	-1.57154	0.0190302	0.0716982	scaf43	2255961	2279633	+	3351	-	GO:0004672;GO:0004672;GO:0004713;GO:0004713;GO:0005515;GO:0005524;GO:0005524;GO:0005887;GO:0005887;GO:0006468;GO:0006468;GO:0016020;GO:0016020;GO:0016020;GO:0016021;GO:0018108;	-	-	-	-	-	-
BGIBMGA011704	16.9111	26.0808	7.74134	0.296821	-1.75233	0.0191022	0.0719062	scaf16	1034297	1065252	-	1584	-	-	-	-	-	-	-	-
BGIBMGA004856	22.221	32.74	11.702	0.357422	-1.4843	0.0195162	0.0732085	scaf46	1218321	1220746	+	912	-	-	-	-	-	-	-	-
BGIBMGA003914	23.5795	34.4893	12.6696	0.36735	-1.44477	0.0197092	0.0738465	scaf114	349677	357926	-	2319	-	GO:0016020;GO:0016021;GO:0016021;GO:0016021;GO:0055085;GO:0055085;	-	-	-	-	-	101742394
BGIBMGA011909	80.1238	111.414	48.8332	0.438303	-1.19	0.0198537	0.0741664	scaf59	1750526	1751662	-	558	-	-	-	-	-	-	-	-
BGIBMGA012826	46.0951	61.5737	30.6165	0.497233	-1.00801	0.0199927	0.0745158	scaf4	5252716	5254065	-	1350	-	GO:0004930;GO:0004930;GO:0007186;GO:0007186;GO:0016020;GO:0016021;GO:0016021;GO:0016021;	-	-	-	-	-	-
BGIBMGA001973	27.4561	39.2495	15.6626	0.399053	-1.32535	0.0199975	0.0745158	scaf28	3874944	3880273	+	405	-	GO:0016020;GO:0016021;GO:0016021;	-	-	-	-	-	-
BGIBMGA010179	29.6593	42.2605	17.0581	0.403643	-1.30885	0.0202703	0.0752931	scaf15	637330	638520	-	465	-	-	-	-	-	-	-	-
BGIBMGA006938	43.1337	58.1151	28.1523	0.484424	-1.04566	0.0203018	0.0753881	scaf44	789848	790033	+	186	-	-	-	-	-	-	-	-
BGIBMGA000755	33.0526	45.7733	20.332	0.44419	-1.17075	0.0204363	0.075774	scaf89	1185359	1186051	-	693	-	-	-	-	-	-	-	101736091
BGIBMGA013912	14.9229	23.1511	6.69471	0.289175	-1.78999	0.020518	0.0760163	scaf29	2295587	2306766	-	1173	-	-	-	-	-	-	-	-
BGIBMGA012370	143.107	190.998	95.2152	0.498513	-1.0043	0.0205718	0.0761759	scaf82	1463287	1471890	-	1266	-	GO:0004725;GO:0004725;GO:0006470;GO:0006470;GO:0016311;GO:0016311;GO:0016787;GO:0016791;GO:0016791;GO:0035335;	-	-	-	-	-	-
BGIBMGA001256	30.1347	42.4914	17.7779	0.418388	-1.25709	0.0206054	0.0762522	scaf1	11422444	11442177	+	5331	-	GO:0005509;GO:0005509;GO:0005515;GO:0016020;GO:0016021;GO:0016021;GO:0030509;GO:0030509;GO:0048513;GO:0048513;GO:0060828;GO:0060828;	-	-	-	-	-	-
BGIBMGA000972	44.475	63.025	25.925	0.411345	-1.28158	0.0210845	0.0777448	scaf1	7703907	7706171	-	219	-	GO:0005515;	-	-	-	-	-	-
BGIBMGA010075	37.7171	51.5913	23.8428	0.462148	-1.11357	0.0212806	0.0783912	scaf45	1508538	1509539	+	1002	-	-	-	-	-	-	-	-
BGIBMGA008617	24.9257	37.8795	11.9719	0.316052	-1.66176	0.0215692	0.0792056	scaf136	181378	185559	-	1305	-	-	-	-	-	-	-	-
BGIBMGA011590	16.8135	25.7957	7.83131	0.30359	-1.7198	0.0216275	0.0793522	scaf22	4879316	4896202	+	2715	-	GO:0004970;GO:0004970;GO:0005216;GO:0005216;GO:0005234;GO:0005886;GO:0005886;GO:0006811;GO:0006811;GO:0006811;GO:0016020;GO:0016020;GO:0016020;GO:0016021;GO:0016021;GO:0034220;GO:0035235;GO:0038023;GO:0038023;GO:0098794;	-	-	-	-	-	-
BGIBMGA008962	20.6576	31.0307	10.2845	0.331429	-1.59323	0.0217303	0.0796613	scaf17	1529348	1530737	+	525	-	-	-	-	-	-	-	-
BGIBMGA003140	53.3369	76.1253	30.5485	0.401293	-1.31727	0.0221865	0.0809887	scaf13	3796947	3797477	+	285	-	-	-	-	-	-	-	-
BGIBMGA013177	8.54969	14.9051	2.19424	0.147213	-2.76402	0.0224275	0.0817296	scaf39	1861841	1862104	-	264	-	-	-	-	-	-	-	-
BGIBMGA008366	6.92835	12.4502	1.40652	0.112971	-3.14597	0.0225463	0.08207	scaf2	3411541	3419988	-	1227	-	-	-	-	-	-	-	-
BGIBMGA009810	33.1393	46.5873	19.6912	0.422673	-1.24239	0.0226287	0.0823	scaf161	256456	259211	-	681	-	GO:0004930;GO:0004930;GO:0007186;GO:0007186;GO:0016020;GO:0016021;GO:0016021;GO:0016021;	-	-	-	-	-	-
BGIBMGA006094	38.8648	52.6492	25.0804	0.476368	-1.06985	0.0227916	0.0827758	scaf5	649648	653218	+	489	-	-	-	-	-	-	-	-
BGIBMGA011350	15.9075	24.6024	7.21252	0.293163	-1.77022	0.0229093	0.0830821	scaf12	2740370	2753615	+	1728	-	GO:0016020;GO:0016020;GO:0016020;GO:0016021;GO:0016021;	-	-	-	-	-	-
BGIBMGA006432	35.768	48.9197	22.6162	0.462314	-1.11306	0.022921	0.0830821	scaf11	832503	834642	-	297	-	-	-	-	-	-	-	-
BGIBMGA006452	40.6931	54.6294	26.7568	0.489788	-1.02977	0.0230249	0.083365	scaf11	561671	564168	+	504	-	-	-	-	-	-	-	-
BGIBMGA006443	31.5796	48.2953	14.8639	0.307771	-1.70007	0.0232698	0.0841377	scaf11	438988	440486	-	723	-	-	-	-	-	-	-	-
BGIBMGA001820	41.7165	59.0503	24.3826	0.412913	-1.27609	0.0232866	0.0841472	scaf35	3486798	3488072	+	1275	-	-	-	-	-	-	-	101746931
BGIBMGA008802	24.3723	35.8051	12.9396	0.361389	-1.46838	0.0233684	0.0843312	scaf134	797487	804097	-	753	-	GO:0004930;GO:0004930;GO:0004930;GO:0007165;GO:0007186;GO:0007186;GO:0007186;GO:0016020;GO:0016021;GO:0016021;GO:0016021;	-	-	-	-	-	-
BGIBMGA005080	11.6103	19.001	4.21955	0.222069	-2.17092	0.0233701	0.0843312	scaf32	1329255	1339451	-	1722	-	-	-	-	-	-	-	-
BGIBMGA010357	68.8002	104.891	32.7097	0.311846	-1.68109	0.0234164	0.0844746	scaf6	8137737	8167553	-	5058	-	GO:0005515;	-	-	-	-	-	-
BGIBMGA006968	17.4188	26.2975	8.54008	0.324749	-1.6226	0.0235682	0.0849746	scaf44	3030255	3033573	+	729	-	GO:0016020;GO:0016021;GO:0016021;GO:0071949;GO:0071949;	-	-	-	-	-	-
BGIBMGA005364	15.191	23.7884	6.59373	0.277183	-1.85109	0.0237002	0.0854028	scaf19	2044028	2049560	-	615	-	-	-	-	-	-	-	-
BGIBMGA011678	4.88486	9.33087	0.438848	0.0470318	-4.41022	0.0238013	0.0857191	scaf16	1752617	1752892	-	276	-	-	-	-	-	-	-	-
BGIBMGA008918	4.84422	9.2496	0.438848	0.047445	-4.3976	0.0241874	0.0869401	scaf17	1241692	1259280	-	1488	-	GO:0003824;GO:0003824;GO:0005975;GO:0005975;GO:0016491;GO:0016491;GO:0016616;GO:0016616;GO:0055114;GO:0055114;	K00026	EC:1.1.1.37	-	-	-	101740981
BGIBMGA000871	9.46932	16.6544	2.28421	0.137153	-2.86614	0.0243215	0.0873732	scaf1	12804830	12819827	-	1482	-	-	-	-	-	-	-	-
BGIBMGA005228	3.63469	7.26938	0	0	-Inf	0.0243422	0.087399	scaf110	228160	229485	+	579	-	-	-	-	-	-	-	-
BGIBMGA009919	23.9795	37.4047	10.5544	0.282167	-1.82538	0.0243781	0.0874792	scaf51	2418897	2419244	+	285	-	-	-	-	-	-	-	-
BGIBMGA011075	14.4698	22.7847	6.15488	0.270132	-1.88826	0.0244629	0.0876913	scaf31	2107808	2110481	+	720	-	-	-	-	-	-	-	105843019
BGIBMGA001672	28.3393	39.7784	16.9002	0.424859	-1.23495	0.0246956	0.0883482	scaf35	1567228	1569192	-	621	-	-	-	-	-	-	-	-
BGIBMGA008142	7.70813	13.4809	1.93533	0.143561	-2.80026	0.0247063	0.0883621	scaf52	1133998	1136850	-	351	BMORCPR142	GO:0042302;GO:0042302;GO:0042302;	-	-	-	-	Putative cuticle protein[Source:UniProtKB/TrEMBL;Acc:C0H6Y4]	-
BGIBMGA000363	20.2398	30.285	10.1945	0.336618	-1.57082	0.0250239	0.0892505	scaf18	122489	124917	+	483	-	-	-	-	-	-	-	-
BGIBMGA014153	18.4754	27.803	9.14785	0.329024	-1.60373	0.0250661	0.0893403	scaf99	561188	563264	-	357	-	-	-	-	-	-	-	-
BGIBMGA001173	20.0046	29.4439	10.5654	0.358831	-1.47862	0.0251951	0.089663	scaf1	7658744	7660746	+	957	-	GO:0003676;GO:0003676;GO:0016787;GO:0016787;GO:0046872;GO:0046872;	-	-	-	-	-	-
BGIBMGA014471	24.3099	35.0724	13.5473	0.386268	-1.37232	0.0252673	0.0898542	scaf261	26170	26643	+	384	-	-	-	-	-	-	-	-
BGIBMGA005348	25.4202	36.4153	14.425	0.396126	-1.33597	0.0255438	0.0906537	scaf19	3112396	3128337	-	2409	-	GO:0005515;GO:0007275;GO:0007275;	-	-	-	-	-	-
BGIBMGA013700	41.7752	55.8369	27.7135	0.496329	-1.01063	0.0258308	0.0914963	scaf104	385494	389357	-	1119	-	GO:0005861;GO:0005861;GO:0006937;GO:0006937;	-	-	-	-	-	-
BGIBMGA011832	8.50581	14.4575	2.55413	0.176665	-2.50092	0.0259248	0.0917284	scaf16	3007127	3009150	+	783	-	-	-	-	-	-	-	-
BGIBMGA009884	10.9037	17.5768	4.23056	0.24069	-2.05475	0.0265123	0.0933974	scaf51	921662	935049	+	1323	-	GO:0000166;GO:0003774;GO:0003777;GO:0003777;GO:0005524;GO:0005524;GO:0005524;GO:0005874;GO:0005874;GO:0007018;GO:0007018;GO:0008017;GO:0008017;	-	-	-	-	-	-
BGIBMGA004094	35.7581	49.0009	22.5153	0.459486	-1.12191	0.0265546	0.0935207	scaf36	1687451	1692203	+	810	-	GO:0016020;GO:0016021;GO:0016021;	-	-	-	-	-	-
BGIBMGA011831	10.8631	17.4955	4.23056	0.241808	-2.04807	0.0266934	0.0939328	scaf16	2991985	3005991	+	2415	-	GO:0006811;GO:0006812;GO:0006812;GO:0006814;GO:0006814;GO:0006814;GO:0006885;GO:0006885;GO:0015297;GO:0015299;GO:0015299;GO:0015385;GO:0015385;GO:0016020;GO:0016021;GO:0016021;GO:0016021;GO:0035725;GO:0055085;GO:0055085;GO:1902600;	-	-	-	-	Sodium/hydrogen exchanger[Source:UniProtKB/TrEMBL;Acc:H9JQM5]	-
BGIBMGA003208	18.6755	34.9769	2.37418	0.0678787	-3.8809	0.0267821	0.094091	scaf13	6208581	6219815	+	948	-	GO:0003677;GO:0003677;GO:0003677;GO:0005634;GO:0005634;GO:0006355;GO:0006355;GO:0043565;GO:0043565;GO:0046872;GO:0046872;	-	-	-	-	-	-
BGIBMGA008807	9.98459	16.6273	3.34185	0.200985	-2.31484	0.0272714	0.0954721	scaf134	57047	64929	-	930	-	GO:0005515;	-	-	-	-	-	-
BGIBMGA001020	9.11436	15.3257	2.903	0.18942	-2.40034	0.0275571	0.0963154	scaf1	5251217	5253334	-	438	-	GO:0004252;GO:0004252;GO:0006508;GO:0006508;	-	-	-	-	-	-
BGIBMGA001031	21.5945	31.397	11.792	0.375575	-1.41283	0.0279538	0.097438	scaf1	4411694	4428740	-	999	-	GO:0005861;GO:0005861;	-	-	-	-	-	-
BGIBMGA013903	6.65906	11.7317	1.58646	0.135229	-2.88652	0.0280343	0.0975932	scaf29	2683665	2686002	-	1044	SERPIN-31	GO:0005615;GO:0005615;	K04525	-	-	-	Serpin-31 [Source:UniProtKB/TrEMBL;Acc:C0J8I0]"	100272195
BGIBMGA006989	6.60972	11.8129	1.40652	0.119066	-3.07017	0.0284213	0.0985961	scaf21	4442165	4461906	-	6387	-	GO:0005576;GO:0005576;GO:0005975;GO:0005975;GO:0006030;GO:0006030;GO:0008061;GO:0008061;	-	-	-	-	-	-
BGIBMGA008400	16.3237	25.5248	7.12255	0.279044	-1.84143	0.02853	0.0989123	scaf2	640484	642194	-	399	-	GO:0016020;GO:0016021;GO:0016021;	-	-	-	-	-	-
BGIBMGA009327	7.69023	13.5351	1.84536	0.136339	-2.87473	0.0285794	0.0990035	scaf53	1501269	1509422	-	834	-	GO:0007165;GO:0007165;	-	-	-	-	-	-
BGIBMGA001010	37.5924	50.7231	24.4616	0.482257	-1.05212	0.0291626	0.100592	scaf1	5666627	5667932	-	726	-	GO:0005576;GO:0005576;GO:0006030;GO:0006030;GO:0008061;GO:0008061;	-	-	-	-	-	-
BGIBMGA002056	31.5066	43.21	19.8032	0.458302	-1.12563	0.0295051	0.101583	scaf23	407753	411868	-	1239	-	-	-	-	-	-	-	-
BGIBMGA009456	20.8466	30.6101	11.0832	0.362076	-1.46563	0.0295232	0.101591	scaf40	1827626	1829021	-	627	-	-	-	-	-	-	-	-
BGIBMGA005359	23.4543	33.3502	13.5584	0.406545	-1.29851	0.029736	0.102187	scaf19	2258686	2259877	-	1116	-	-	-	-	-	-	-	-
BGIBMGA011191	15.5411	23.8696	7.21252	0.302163	-1.7266	0.029972	0.102882	scaf12	5429007	5440003	-	1248	-	-	-	-	-	-	-	-
BGIBMGA010917	4.67893	8.82904	0.52882	0.0598955	-4.06141	0.0300337	0.102991	scaf68	1487411	1491745	-	552	-	-	-	-	-	-	-	-
BGIBMGA009100	12.7623	19.9776	5.5471	0.277666	-1.84858	0.0301623	0.10335	scaf63	1209336	1210459	+	339	-	-	-	-	-	-	-	-
BGIBMGA005873	25.6217	36.4695	14.7739	0.405103	-1.30364	0.0302397	0.103532	scaf67	1901070	1901417	-	348	-	-	-	-	-	-	-	-
BGIBMGA002075	30.2392	44.1181	16.3604	0.370831	-1.43117	0.0310103	0.105694	scaf23	62293	62999	+	480	-	-	-	-	-	-	-	105842509
BGIBMGA009908	7.32661	12.8978	1.75539	0.1361	-2.87727	0.0311513	0.106062	scaf51	1977789	1980096	+	327	-	GO:0003676;GO:0003676;	-	-	-	-	-	-
BGIBMGA005880	47.7782	64.2311	31.3252	0.487696	-1.03595	0.0312352	0.106264	scaf67	1322074	1340939	-	2691	-	GO:0000166;GO:0000166;GO:0000166;GO:0000287;GO:0000287;GO:0000287;GO:0004012;GO:0004012;GO:0004012;GO:0005524;GO:0005524;GO:0005524;GO:0015914;GO:0015914;GO:0016020;GO:0016021;GO:0016021;GO:0016021;GO:0016787;GO:0045332;	-	-	-	-	-	-
BGIBMGA004855	16.8134	25.2668	8.36013	0.330875	-1.59564	0.0312968	0.106417	scaf46	1211515	1216068	+	894	-	-	-	-	-	-	-	-
BGIBMGA012258	15.1222	23.5717	6.67269	0.283081	-1.82071	0.0313921	0.106657	scaf26	2073585	2076213	-	1470	-	GO:0005509;GO:0005509;GO:0016020;GO:0016021;GO:0016021;GO:0016021;GO:0016079;GO:0016079;GO:0045202;GO:0098793;GO:0098793;	-	-	-	-	-	-
BGIBMGA000417	9.02113	14.9593	3.08295	0.206089	-2.27866	0.032031	0.108513	scaf18	2699234	2705473	+	2373	-	-	-	-	-	-	-	-
BGIBMGA010978	14.516	23.9238	5.10825	0.213522	-2.22754	0.0320741	0.108631	scaf83	299406	334193	-	5229	-	GO:0005929;GO:0005929;	-	-	-	-	-	-
BGIBMGA004237	10.4815	16.9125	4.05061	0.239505	-2.06187	0.0323042	0.109359	scaf150	301542	301802	-	261	-	-	-	-	-	-	-	-
BGIBMGA010460	10.423	16.8854	3.96064	0.234561	-2.09197	0.0326168	0.110266	scaf6	1145111	1176580	-	3255	-	GO:0004930;GO:0004930;GO:0004965;GO:0004965;GO:0007186;GO:0007186;GO:0016020;GO:0016021;GO:0016021;GO:0016021;	-	-	-	-	-	-
BGIBMGA011580	3.37023	6.74046	0	0	-Inf	0.0326885	0.110454	scaf22	4376535	4377981	+	378	-	-	-	-	-	-	-	-
BGIBMGA001745	9.6974	15.963	3.43182	0.214986	-2.21768	0.0326893	0.110454	scaf35	936668	940389	+	921	-	GO:0004252;GO:0004252;GO:0006508;GO:0006508;GO:0006508;GO:0008233;GO:0008236;GO:0016787;	-	-	-	-	-	-
BGIBMGA005123	8.05222	13.8202	2.28421	0.16528	-2.59701	0.0327574	0.110539	scaf32	1535711	1541329	+	807	-	GO:0005515;	-	-	-	-	-	-
BGIBMGA014009	35.2061	48.5946	21.8175	0.44897	-1.15531	0.0330587	0.11141	scaf29	4010802	4015362	+	1038	-	GO:0005507;GO:0005507;GO:0055114;GO:0055114;	-	-	-	-	-	-
BGIBMGA010652	21.7825	31.4241	12.1408	0.386354	-1.37201	0.033743	0.113008	scaf84	339464	341350	+	1887	-	-	-	-	-	-	-	-
BGIBMGA011365	15.4566	23.3407	7.57241	0.324429	-1.62402	0.0338816	0.113354	scaf12	3309269	3310453	+	813	-	-	-	-	-	-	-	-
BGIBMGA011006	31.6365	43.4808	19.7922	0.455194	-1.13545	0.0341536	0.114117	scaf83	1481437	1485453	+	774	-	-	-	-	-	-	-	-
BGIBMGA014485	31.3032	43.2641	19.3423	0.447076	-1.16141	0.0346849	0.115622	scaf297	35905	38677	+	402	-	GO:0016020;GO:0016021;GO:0016021;	-	-	-	-	-	-
BGIBMGA000622	27.0821	37.8937	16.2704	0.429369	-1.21971	0.0350637	0.116524	scaf8	907742	935941	+	14445	-	-	-	-	-	-	-	-
BGIBMGA000749	18.6423	28.0468	9.23783	0.329372	-1.60221	0.0352399	0.116989	scaf8	7891768	7892082	+	315	-	-	-	-	-	-	-	-
BGIBMGA013880	6.28673	11.2569	1.31654	0.116954	-3.09598	0.0357769	0.118387	scaf62	2131009	2134054	+	534	-	GO:0016020;GO:0016021;GO:0016021;	-	-	-	-	-	-
BGIBMGA000238	12.8093	24.0322	1.58646	0.066014	-3.92108	0.0361907	0.119469	scaf18	4599000	4611061	-	1458	-	GO:0004601;GO:0004601;GO:0006979;GO:0006979;GO:0020037;GO:0020037;GO:0042600;GO:0042600;GO:0055114;GO:0055114;GO:0098869;	-	-	-	-	-	-
BGIBMGA009846	7.25564	12.396	2.11528	0.170642	-2.55096	0.0363802	0.119941	scaf51	1370652	1377038	-	570	-	-	-	-	-	-	-	-
BGIBMGA006643	11.7273	18.5263	4.92831	0.266017	-1.91041	0.0364588	0.120126	scaf10	2444779	2454801	-	5814	-	-	-	-	-	-	-	-
BGIBMGA008628	7.21066	12.396	2.02531	0.163384	-2.61366	0.0367642	0.120991	scaf136	244472	244896	+	363	-	-	-	-	-	-	-	-
BGIBMGA014422	34.5947	46.5731	22.6162	0.485608	-1.04214	0.0369358	0.121401	scaf198	39295	52471	-	4827	-	GO:0003777;GO:0003777;GO:0007018;GO:0007018;GO:0030286;GO:0030286;	-	-	-	-	-	-
BGIBMGA013215	25.3811	35.6284	15.1338	0.424768	-1.23525	0.0370679	0.121704	scaf39	148305	155924	+	2004	-	GO:0016614;GO:0016614;GO:0050660;GO:0050660;GO:0055114;GO:0055114;	-	-	-	-	-	-
BGIBMGA009455	22.8852	32.482	13.2884	0.409102	-1.28947	0.0376207	0.123056	scaf40	1853845	1855752	-	426	-	-	-	-	-	-	-	-
BGIBMGA009506	25.0797	35.6555	14.504	0.406782	-1.29767	0.0377244	0.123302	scaf40	1801417	1801671	+	255	-	-	-	-	-	-	-	-
BGIBMGA010582	31.2772	42.7623	19.7922	0.462842	-1.11141	0.0378727	0.123724	scaf6	7705573	7713700	+	681	-	GO:0005576;GO:0005576;GO:0052689;GO:0052689;	-	-	-	-	-	-
BGIBMGA014380	21.5093	31.0577	11.9609	0.385118	-1.37663	0.0380139	0.124059	scaf155	332147	334136	+	714	-	-	-	-	-	-	-	-
BGIBMGA013248	23.7885	33.7707	13.8062	0.408823	-1.29045	0.0382108	0.124582	scaf39	2074584	2075173	+	480	-	-	-	-	-	-	-	-
BGIBMGA008445	5.37745	9.69725	1.05764	0.109066	-3.19673	0.0383482	0.124902	scaf2	1853060	1872164	+	3222	-	GO:0005506;GO:0005506;GO:0009055;GO:0009055;GO:0016491;GO:0016491;GO:0016614;GO:0022900;GO:0046872;GO:0046872;GO:0046872;GO:0050660;GO:0050660;GO:0051536;GO:0051536;GO:0051536;GO:0051537;GO:0051537;GO:0051537;GO:0055114;GO:0055114;	-	-	-	-	-	-
BGIBMGA006759	7.02152	12.2877	1.75539	0.142858	-2.80735	0.0384434	0.125176	scaf10	5292801	5300605	+	1422	-	-	-	-	-	-	-	-
BGIBMGA006854	36.5779	48.7842	24.3716	0.49958	-1.00121	0.0388029	0.126061	scaf70	634876	636767	+	336	-	-	-	-	-	-	-	-
BGIBMGA002663	4.38738	8.24595	0.52882	0.0641309	-3.96284	0.0391209	0.126775	scaf20	854986	855744	+	759	-	GO:0004984;GO:0004984;GO:0005549;GO:0005549;GO:0007165;GO:0007608;GO:0007608;GO:0007608;GO:0016020;GO:0016020;GO:0016020;GO:0016021;GO:0016021;GO:0050896;GO:0050911;	-	-	-	-	-	-
BGIBMGA002668	9.4015	15.4611	3.34185	0.216145	-2.20993	0.0391596	0.126868	scaf20	1516126	1519029	+	624	-	-	-	-	-	-	-	-
BGIBMGA006008	19.5829	28.5215	10.6443	0.373204	-1.42196	0.0399209	0.128946	scaf5	3804757	3806879	-	537	-	GO:0003677;GO:0003677;GO:0003677;GO:0005634;GO:0005634;GO:0007275;GO:0007275;	-	-	-	-	-	-
BGIBMGA011649	19.5558	28.4673	10.6443	0.373914	-1.41922	0.0400033	0.129147	scaf16	2950037	2961201	-	1737	-	GO:0016020;GO:0016021;GO:0016021;	-	-	-	-	-	-
BGIBMGA010601	26.538	36.7945	16.2814	0.442495	-1.17627	0.0403765	0.130059	scaf234	59744	65493	+	900	-	GO:0005576;GO:0005576;GO:0006629;GO:0006629;GO:0052689;GO:0052689;	-	-	-	-	-	-
BGIBMGA007861	241.251	353.162	129.341	0.366236	-1.44915	0.0412283	0.132341	scaf3	3859497	3878009	+	5085	-	GO:0005201;GO:0005201;	-	-	-	-	-	-
BGIBMGA009867	12.1933	19.1094	5.27718	0.276157	-1.85644	0.041304	0.132518	scaf51	220367	225072	-	417	-	GO:0000166;GO:0000166;GO:0005622;GO:0005622;GO:0009190;GO:0009190;GO:0016020;GO:0016021;GO:0016021;GO:0016829;GO:0016849;GO:0016849;GO:0035556;GO:0035556;	-	-	-	-	-	-
BGIBMGA006549	12.1754	19.1636	5.18721	0.270681	-1.88533	0.0413986	0.132755	scaf10	6828337	6830124	-	324	-	-	-	-	-	-	-	-
BGIBMGA013831	14.2725	21.5914	6.95362	0.322054	-1.63462	0.0416301	0.133398	scaf62	923862	928783	-	1737	-	GO:0008152;GO:0016020;GO:0016021;GO:0016021;GO:0016740;GO:0016757;GO:0016758;GO:0016758;	-	-	-	-	-	-
BGIBMGA001351	36.325	48.5262	24.1237	0.497128	-1.00831	0.0416789	0.133521	scaf118	269885	277683	-	1023	-	GO:0016491;GO:0016491;GO:0055114;GO:0055114;	-	-	-	-	-	-
BGIBMGA000148	20.2463	28.7795	11.713	0.40699	-1.29693	0.0420085	0.134477	scaf43	2109927	2110303	+	330	-	GO:0003676;GO:0003676;	-	-	-	-	-	-
BGIBMGA014603	22.5308	31.953	13.1085	0.410243	-1.28545	0.0424255	0.135577	scaf577	4201	5586	+	384	-	-	-	-	-	-	-	-
BGIBMGA002729	10.8901	17.0208	4.75938	0.279621	-1.83845	0.0429301	0.136884	scaf20	5386218	5390561	+	867	-	GO:0000166;GO:0005524;GO:0005524;GO:0005524;GO:0016021;GO:0016021;GO:0016887;GO:0016887;GO:0042626;GO:0042626;GO:0055085;GO:0055085;	-	-	-	-	-	-
BGIBMGA009907	6.12143	10.8363	1.40652	0.129796	-2.94568	0.0430624	0.137204	scaf51	1969110	1973311	+	867	-	GO:0005515;	-	-	-	-	-	-
BGIBMGA001993	26.5899	37.2693	15.9105	0.426907	-1.22801	0.0431915	0.137514	scaf23	4960991	4968325	-	573	-	-	-	-	-	-	-	-
BGIBMGA008029	3.11932	6.23864	0	0	-Inf	0.0435908	0.138648	scaf41	382892	389072	-	732	-	GO:0000256;GO:0000256;GO:0004037;GO:0004037;	-	-	-	-	-	-
BGIBMGA013333	52.0281	72.1121	31.944	0.442978	-1.17469	0.0441182	0.139946	scaf142	380940	385868	+	2127	-	GO:0003676;GO:0003676;GO:0003677;GO:0003677;	-	-	-	-	-	-
BGIBMGA007391	24.2783	34.0416	14.515	0.42639	-1.22975	0.0441476	0.140005	scaf55	364401	371599	+	1434	-	GO:0003824;GO:0003824;GO:0009058;GO:0009058;GO:0030170;GO:0030170;	K00825	-	-	-	-	101738563
BGIBMGA011366	21.9488	30.8681	13.0295	0.422103	-1.24433	0.0445717	0.140934	scaf12	3314885	3315486	+	213	-	-	-	-	-	-	-	-
BGIBMGA003535	70.5991	104.416	36.7824	0.352268	-1.50525	0.0447088	0.141285	scaf9	2940971	2943141	-	1134	-	GO:0005741;GO:0005741;GO:0008320;GO:0008320;GO:0030150;GO:0030150;GO:0055085;GO:0055085;	K11518	-	-	-	-	101743849
BGIBMGA003455	7.69889	12.8437	2.55413	0.198863	-2.33015	0.046125	0.145099	scaf9	7226387	7229703	-	1578	-	GO:0005622;GO:0005622;GO:0007155;GO:0007155;GO:0007266;GO:0007266;GO:0051015;GO:0051015;	-	-	-	-	-	-
BGIBMGA001407	8.47432	13.9557	2.99297	0.214463	-2.2212	0.0462209	0.145295	scaf7	6606201	6608688	-	1269	-	-	-	-	-	-	-	101744418
BGIBMGA006332	16.0965	23.6529	8.54008	0.361058	-1.4697	0.0465077	0.145983	scaf49	2128602	2143628	+	2022	-	-	-	-	-	-	-	-
BGIBMGA011817	8.39789	13.9828	2.81303	0.201179	-2.31345	0.0468697	0.146947	scaf16	2479317	2489013	+	696	-	GO:0008146;GO:0008146;GO:0016021;GO:0016021;	-	-	-	-	-	-
BGIBMGA009464	9.82206	16.3023	3.34185	0.204993	-2.28635	0.0470836	0.14736	scaf40	1241264	1247001	-	933	-	-	-	-	-	-	-	-
BGIBMGA001101	18.5566	26.9077	10.2055	0.379278	-1.39867	0.0478749	0.149402	scaf1	1689280	1696156	+	1146	-	-	-	-	-	-	-	-
BGIBMGA004633	11.9017	18.5263	5.27718	0.284848	-1.81173	0.0482402	0.150106	scaf193	8426	10886	-	801	-	-	-	-	-	-	-	-
BGIBMGA003567	27.075	38.4084	15.7416	0.409848	-1.28684	0.0482562	0.15012	scaf9	1705374	1707745	-	771	-	GO:0004252;GO:0004252;GO:0006508;GO:0006508;GO:0006508;GO:0008233;GO:0008236;GO:0016787;	-	-	-	-	-	101738353
BGIBMGA003884	5.09509	9.22251	0.967667	0.104924	-3.25258	0.0484366	0.150609	scaf72	262222	263708	+	435	-	-	-	-	-	-	-	-
BGIBMGA002703	5.07719	9.27669	0.877695	0.094613	-3.40182	0.0487034	0.151183	scaf20	4200136	4202964	+	774	-	GO:0031409;GO:0031409;	-	-	-	-	-	-
BGIBMGA010059	27.8248	38.4226	17.2271	0.448357	-1.15728	0.0493078	0.152546	scaf45	1025170	1028091	+	2922	-	GO:0005216;GO:0005216;GO:0005515;GO:0006811;GO:0006811;GO:0006811;GO:0016020;GO:0016020;GO:0016020;GO:0016021;GO:0016021;GO:0034220;GO:0055085;GO:0055085;	-	-	-	-	-	-
BGIBMGA008919	15.2088	22.6764	7.74134	0.341384	-1.55053	0.0497183	0.153595	scaf17	1211927	1216274	-	1041	-	-	-	-	-	-	-	-
